# Supplementary material for: Syntheses, structural, photophysical and theoretical studies of heteroleptic cycloplatinated guanidinate(1−) complexes bearing acetylacetonate and picolinate ancillary ligands
Source: Royal Society of Chemistry journal article supplement (doi:10.1039/d4ra00828f), 2024-01-01
Supplement: d4ra00828f2.pdf [file d4ra00828f2.pdf]

**Syntheses, structural, photophysical and theoretical studies of heteroleptic cycloplatinated guanidinate(1–) complexes bearing acetylacetonate and picolinate ancillary ligands**

**Vasudha Thakur,<sup>a</sup> Jisha Mary Thomas,<sup>b</sup> Mohammad Adnan,<sup>c</sup> Chinnappan Sivasankar,<sup>b</sup> G. Vijaya Prakash,<sup>c</sup> and Natesan Thirupathi\*<sup>a</sup>**

---

*<sup>a</sup>Department of Chemistry, University of Delhi, Delhi 110 007, India. Email: tnat@chemistry.du.ac.in, thirupathi\_n@yahoo.com*

*<sup>b</sup>Catalysis and Energy Laboratory, Department of Chemistry, Pondicherry University, Puducherry 605 014, India. E-mail: siva.che@pondiuni.edu.in*

*<sup>c</sup>Nanophotonics Laboratory, Department of Physics, Indian Institute of Technology, Delhi, New Delhi-110016, India. Email: prakash@physics.iitd.ac.in*

**General considerations**  $K_2PtCl_4$  (Alfa Aesar),  $Ag(OC(O)CF_3)$  (Spectrochem) and NaOAc (Sigma Aldrich) were purchased from commercial vendors and used as received. The IR spectral data were obtained through ATR method from powdered samples on an IRAffinity-1 Shimadzu FTIR spectrometer in the frequency range 400–4000  $cm^{-1}$ . Elemental analyses were performed on an Elementar Analysensysteme GmbH VarioEL V3.00 and VarioEL Cube. Time of flight mass (TOF-MS) spectra were recorded on Agilent Technologies 6530, Accurate-Mass Q-TOF LC/MS instrument using electrospray positive ion mode.  $^1H$ ,  $^{13}C$  and  $^{19}F$  NMR spectra were recorded on a JEOL ECX 400 NMR spectrometer operating at 400, 100.5, and 376.5 MHz (with  $CF_3COOH$  as an external standard), respectively.  $^{195}Pt$  NMR spectra of **10–13** were recorded on a Bruker AV-400 NMR spectrometer operating at 85.8 MHz (with  $K_2PtCl_4$  as an external standard).  $^{195}Pt$  NMR spectra of **7–9** and **14–19** were recorded on a JEOL ECX 400 NMR spectrometer operating at 85.8 MHz (with  $K_2PtCl_4$  as an external standard). The chemical shifts are reported in ppm relative to tetramethylsilane or residual solvent signal. Melting points were recorded on a Buchi melting point apparatus (Model: M-560) and the reported values are uncorrected.

### **Optical measurements**

The microscopic optical images (Bright field), PL images and crystalline state visible emission spectra were recorded using a modified confocal high-resolution microscope (Olympus BX-51). The modified microscope is equipped with a fiber coupled 400nm ( $\pm 5$ nm) diode laser and -xenon lamp as sources. The emission spectra and images were collected, respectively by a fiber optic spectrometer (Ocean Optics, Maya 2000Pro) and a camera (Olympus, DP26) through a 425 nm long-pass filter in specular reflection mode.<sup>1</sup>

## Syntheses of some useful compounds

Symmetrical *N,N',N''*-triarylguanidines,  $[\text{ArN}=\text{C}(\text{NHAr})_2]$  ( $\text{Ar} = 2\text{-(MeO)C}_6\text{H}_4$ ,  $2\text{-MeC}_6\text{H}_4$ ,  $4\text{-MeC}_6\text{H}_4$ ,  $2,4\text{-Me}_2\text{C}_6\text{H}_3$ ,<sup>2</sup>  $2,5\text{-Me}_2\text{C}_6\text{H}_3$ ,<sup>3</sup>  $2\text{-FC}_6\text{H}_4$ <sup>4</sup> and  $2\text{-ClC}_6\text{H}_4$ <sup>5</sup>), *cis*- $[\text{PtCl}_2(\text{S}(\text{O})\text{Me}_2)_2]$ , *cis*- $[\text{Pt}(\text{TFA})_2(\text{S}(\text{O})\text{Me}_2)_2]$ <sup>6</sup> and **1–5**<sup>3,5,6</sup> were prepared following the literature procedures.

$[\text{ArN}=\text{C}(\text{N}(\text{H})\text{Ar})_2]$  ( $\text{Ar} = 2\text{-BrC}_6\text{H}_4$ ) *N,N'*-Bis(2-bromophenyl)thiourea (386 mg, 1.00 mmol), 2-bromoaniline (190 mg, 1.10 mmol), KOH (675 mg as 70% aq. solution) and nitrobenzene (100 mg) were charged into a 25 mL round bottom (RB) flask. The contents in the RB flask were gradually heated up to 110 °C and maintained at the same temperature, while being stirred for 8 h. The reaction mixture was cooled to RT and diluted with water (10 mL). The organic portion was extracted with  $\text{CH}_2\text{Cl}_2$  ( $3 \times 5$  mL) and the extract dried over anhydrous  $\text{Na}_2\text{SO}_4$  for an hour and filtered. The volatiles from the extract were removed under vacuum to afford a dirty white solid. Subsequently, the solid was purified by column chromatography using 5% ethyl acetate:*n*-hexane (1/5, v/v) mixture as eluent to afford the guanidine as white flaky solid. Yield = 85% (445.3 mg, 0.849 mmol). Mp: 131.4 °C. Anal. Calcd. for  $\text{C}_{19}\text{H}_{14}\text{N}_3\text{Br}_3$  ( $M_w = 524.05$ ): C, 43.55; H, 2.69; N, 8.02. Found: C, 43.35; H, 2.54; N, 7.80. ATR-IR ( $\text{cm}^{-1}$ ):  $\nu(\text{NH})$  3368 (br, w);  $\nu(\text{C}=\text{N})$  1632 (m). ESI Mass (HRMS)  $m/z$  [ion] Calcd.: 523.8796  $[\text{M}+\text{H}]^+$ . Found 523.8832.  $^1\text{H}$  NMR ( $\text{CDCl}_3$ , 400 MHz):  $\delta_{\text{H}}$  6.93 (br, 3 H, *ArH* (1 H), *NH* (2 H)), 7.30 (t,  $J_{\text{HH}} = 7.8$  Hz, 6 H, *ArH*), 7.55 (d,  $J_{\text{HH}} = 7.6$  Hz, 5 H, *ArH*).  $^{13}\text{C}\{^1\text{H}\}$  NMR ( $\text{CDCl}_3$ , 100.5 MHz):  $\delta_{\text{C}}$  122.9, 124.0, 125.4, 126.7, 128.6, 129.7, 133.0, 144.1.

[ArN=C(N(H)Ar)<sub>2</sub>] (Ar = 4-FC<sub>6</sub>H<sub>4</sub>) *N,N'*-Bis(4-fluorophenyl)thiourea (500 mg, 1.89 mmol), 4-fluoroaniline (210 mg, 1.89mmol), KOH (260 mg as 35% aq. solution) and nitrobenzene (100 mg) were charged into a 25 mL RB flask. The contents in the RB flask were gradually heated up to 110 °C and maintained at the same temperature, while being stirred for 8 h. The reaction mixture was cooled to RT and diluted with water (10 mL). The organic portion was extracted with CH<sub>2</sub>Cl<sub>2</sub> (3 × 5 mL) and the extract dried over anhydrous Na<sub>2</sub>SO<sub>4</sub> for an hour and filtered. The volatiles from the extract were removed under vacuum to afford a dirty white solid. Subsequently, the solid was purified by column chromatography using 10% ethyl acetate:*n*-hexane (1/10, v/v) mixture as eluent to afford the guanidine as white solid. Yield = 71% (458.5 mg, 1.343 mmol). Mp: 105.2 °C. ATR–IR (cm<sup>-1</sup>): ν(NH) 3398 (w); ν(C=N) 1631 (s); 826 (s). ESI Mass (HRMS) *m/z* [ion] Calcd.: 341.1140 [M+H]<sup>+</sup>. Found: 341.1159. <sup>1</sup>H NMR (CDCl<sub>3</sub>, 400 MHz): δ<sub>H</sub> 5.72 (br, 2 H, NH), 6.98–7.02 (m, 6 H, ArH), 7.15 (br, 6 H, ArH). <sup>13</sup>C{<sup>1</sup>H} NMR (CDCl<sub>3</sub>, 100.5 MHz): δ<sub>C</sub> 116.0, 116.2, 122.9, 125.7, 129.5, 139.8, 145.8, 146.1, 158.0, 160.3. <sup>19</sup>F{<sup>1</sup>H} NMR (CDCl<sub>3</sub>, 376.31 MHz): δ<sub>F</sub> -116.3 and -120.8.

**X-Ray crystallography** Details of data collection, structure solution and refinement for structurally characterized compounds are presented in Tables S1 and S2. X-ray crystallographic diffraction data for **11** were collected on a Brukeraxs kappa apex2 Diffractometer with a CCD area detector (MoKα, 0.71073 Å, graphite monochromator).<sup>7</sup> Frames were collected at 293 K by ω, φ, and 2θ rotation at 10 s per frame with APEX2.<sup>8</sup> The measured intensities were reduced to *F*<sup>2</sup> with SAINT/XPREP and corrected for absorption with SADABS.<sup>9</sup> X-ray crystallographic diffraction data for **12–19** were collected at 298 K on an Oxford Xcalibur, Eos diffractometer (4-circle kappa goniometer, Eos CCD

detector, omega scans, graphite monochromator, and a single wavelength Enhance X-ray source with MoK $\alpha$  radiation).<sup>10</sup> Pre-experiment, data collection, data reduction, and absorption corrections were performed with the CrysAlisPro software suite.<sup>11</sup> The structures were solved and refined using the SHELX-2017 program package and SHELXL-2017/1 (within the WinGX program package).<sup>12</sup> Non-hydrogen atoms were refined anisotropically. C–H/N–H hydrogen atoms were placed in geometrically calculated positions by using a riding model. The molecular structures were created with Olex2 program.<sup>13</sup>

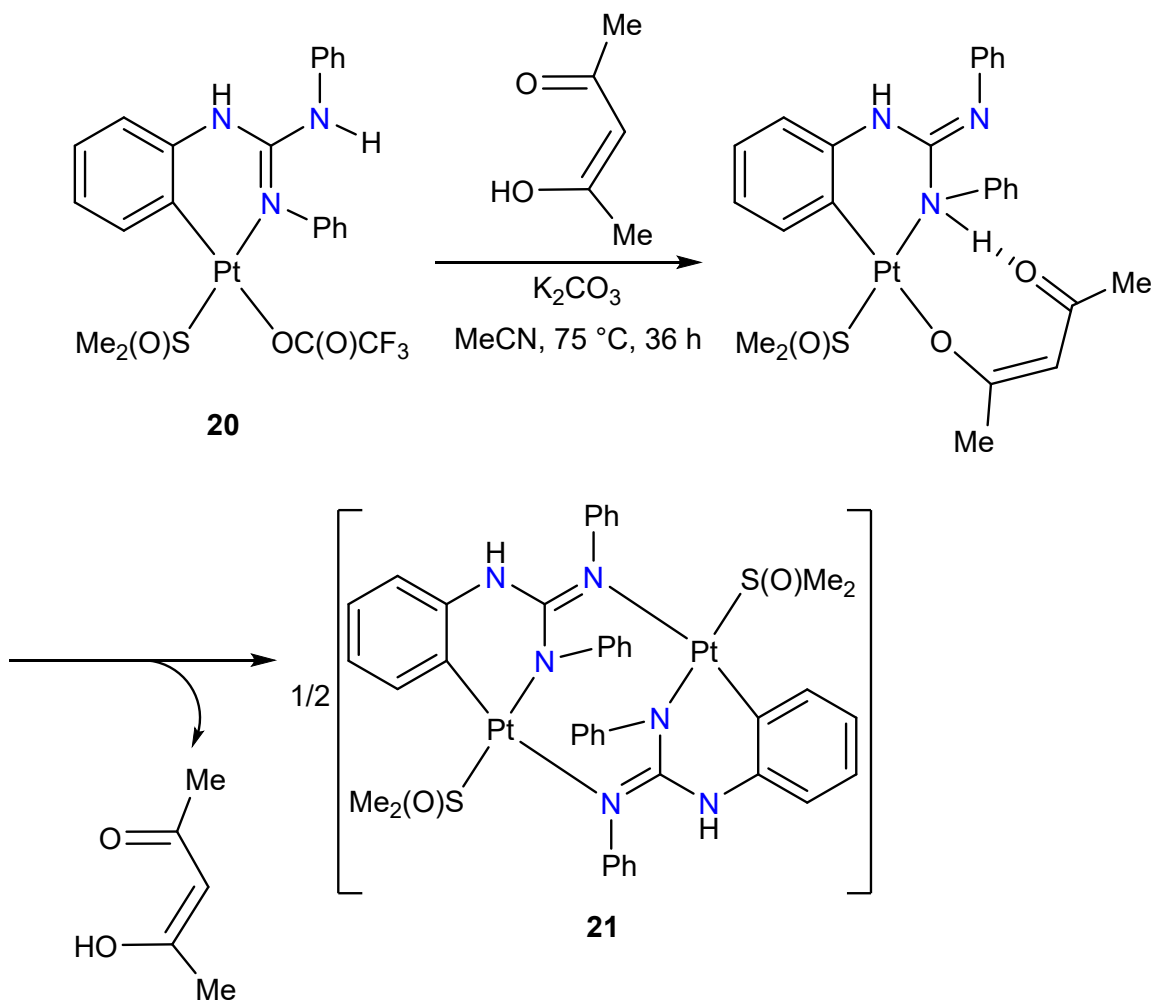

**Scheme S1.** Reaction of **20** with acacH and K<sub>2</sub>CO<sub>3</sub> under the optimized conditions.

**Table S1** Crystallographic data for **11**, **12**, **13**-0.5 toluene, **14** and **15**.

|                                                   | <b>11</b>                                                        | <b>12</b>                                                        | <b>13</b> -0.5 toluene                                                           | <b>14</b>                                                        | <b>15</b>                                                                       |
|---------------------------------------------------|------------------------------------------------------------------|------------------------------------------------------------------|----------------------------------------------------------------------------------|------------------------------------------------------------------|---------------------------------------------------------------------------------|
| Formula                                           | C <sub>27</sub> H <sub>29</sub> N <sub>3</sub> O <sub>2</sub> Pt | C <sub>27</sub> H <sub>29</sub> N <sub>3</sub> O <sub>2</sub> Pt | C <sub>63.25</sub> H <sub>74</sub> N <sub>6</sub> O <sub>4</sub> Pt <sub>2</sub> | C <sub>30</sub> H <sub>35</sub> N <sub>3</sub> O <sub>2</sub> Pt | C <sub>24</sub> H <sub>20</sub> N <sub>3</sub> O <sub>2</sub> F <sub>3</sub> Pt |
| Fw                                                | 622.62                                                           | 622.62                                                           | 1368.43                                                                          | 664.70                                                           | 634.52                                                                          |
| Temperature (K)                                   | 296(2) K                                                         | 298(2)                                                           | 293(2)                                                                           | 298(2)                                                           | 293(2)                                                                          |
| Wavelength (Å)                                    | 0.71073                                                          | 0.71073                                                          | 0.71073                                                                          | 0.71073                                                          | 0.71073                                                                         |
| Crystal system                                    | Triclinic                                                        | Triclinic                                                        | Triclinic                                                                        | Triclinic                                                        | Orthorhombic                                                                    |
| Space group                                       | <i>P</i> -1                                                      | <i>P</i> -1                                                      | <i>P</i> -1                                                                      | <i>P</i> -1                                                      | <i>Pca</i> 2 <sub>1</sub>                                                       |
| <i>a</i> (Å)                                      | 10.5977(5)                                                       | 11.0129(7)                                                       | 12.4667(5)                                                                       | 10.8336(5)                                                       | 23.5630(5)                                                                      |
| <i>b</i> (Å)                                      | 10.9118(5)                                                       | 11.7585(8)                                                       | 13.3851(7)                                                                       | 10.9407(6)                                                       | 5.29830(10)                                                                     |
| <i>c</i> (Å)                                      | 11.3038(5)                                                       | 20.8975(11)                                                      | 18.9089(6)                                                                       | 12.9074(5)                                                       | 18.4229(3)                                                                      |
| $\alpha$ (deg)                                    | 70.094(2)                                                        | 105.026(5)                                                       | 93.304(3)                                                                        | 75.575(4)                                                        | 90                                                                              |
| $\beta$ (deg)                                     | 79.697(2)                                                        | 96.671(5)                                                        | 98.761(3)                                                                        | 88.599(4)                                                        | 90                                                                              |
| $\gamma$ (deg)                                    | 80.099(2)                                                        | 95.534(5)                                                        | 104.327(4)                                                                       | 70.372(4)                                                        | 90                                                                              |
| Volume (Å <sup>3</sup> )                          | 1200.51(10)                                                      | 2573.2(3)                                                        | 3006.5(2)                                                                        | 1392.61(12)                                                      | 2299.99(8)                                                                      |
| <i>Z</i>                                          | 2                                                                | 4                                                                | 2                                                                                | 2                                                                | 4                                                                               |
| $\rho_{\text{calcd}}$ (Mg/m <sup>3</sup> )        | 1.722                                                            | 1.607                                                            | 1.516                                                                            | 1.585                                                            | 1.832                                                                           |
| $\mu$ (Mo K $\alpha$ ) (mm <sup>-1</sup> )        | 5.873                                                            | 5.480                                                            | 4.698                                                                            | 5.068                                                            | 6.151                                                                           |
| <i>F</i> (000)                                    | 612                                                              | 1224                                                             | 1367                                                                             | 660                                                              | 1224                                                                            |
| $\theta$ range (deg)                              | 2.969 – 26.370°                                                  | 3.312–26.372                                                     | 3.003–26.372                                                                     | 3.312–26.371                                                     | 3.459–26.369                                                                    |
| No. of reflns collected                           | 20918                                                            | 35935                                                            | 40424                                                                            | 19670                                                            | 29520                                                                           |
| No. of reflns used                                | 4900                                                             | 10493                                                            | 12285                                                                            | 5685                                                             | 4706                                                                            |
| Parameters                                        | 414                                                              | 595                                                              | 694                                                                              | 325                                                              | 345                                                                             |
| R <sub>1</sub> [I>2 $\sigma$ (I)] <sup>a</sup>    | 0.0126                                                           | 0.0761                                                           | 0.0672                                                                           | 0.0486                                                           | 0.0360                                                                          |
| wR <sub>2</sub> (all reflns) <sup>b</sup>         | 0.0316                                                           | 0.1056                                                           | 0.1412                                                                           | 0.1093                                                           | 0.0822                                                                          |
| GooF on <i>F</i> <sup>2 c</sup>                   | 1.030                                                            | 0.980                                                            | 0.970                                                                            | 1.049                                                            | 1.092                                                                           |
| Largest diff. peak and hole, (e·Å <sup>-3</sup> ) | 0.434/–0.492                                                     | 0.985/–1.010                                                     | 0.772/–0.708                                                                     | 1.683/–0.689                                                     | 0.90/–0.81                                                                      |

$$^a R_1 = \sum ||F_o| - |F_c|| / \sum |F_o|; ^b wR_2 = \{\sum [w(F_o^2 - F_c^2)^2] / \sum [w(F_o^2)^2]\}^{1/2}; ^c S = \{\sum [w(F_o^2 - F_c^2)^2] / (n-p)\}^{1/2}$$

**Table S2** Crystallographic data for **16**, **17**, **18** and **19**.

|                                                                  | <b>16</b>                                                                        | <b>17</b>                                                                        | <b>18</b>                                                                       | <b>19</b>                                                        |
|------------------------------------------------------------------|----------------------------------------------------------------------------------|----------------------------------------------------------------------------------|---------------------------------------------------------------------------------|------------------------------------------------------------------|
| Formula                                                          | C <sub>24</sub> H <sub>20</sub> Cl <sub>3</sub> N <sub>3</sub> O <sub>2</sub> Pt | C <sub>24</sub> H <sub>20</sub> Br <sub>3</sub> N <sub>3</sub> O <sub>2</sub> Pt | C <sub>24</sub> H <sub>20</sub> F <sub>3</sub> N <sub>3</sub> O <sub>2</sub> Pt | C <sub>28</sub> H <sub>26</sub> N <sub>4</sub> O <sub>5</sub> Pt |
| Fw                                                               | 683.87                                                                           | 817.25                                                                           | 634.52                                                                          | 693.62                                                           |
| Temperature (K)                                                  | 298(2)                                                                           | 293(2)                                                                           | 298(2)                                                                          | 298(2)                                                           |
| Wavelength (Å)                                                   | 0.71073                                                                          | 0.71073                                                                          | 0.71073                                                                         | 0.71073                                                          |
| Crystal system                                                   | Monoclinic                                                                       | Monoclinic                                                                       | Monoclinic                                                                      | Monoclinic                                                       |
| Space group                                                      | <i>P2<sub>1</sub>/n</i>                                                          | <i>P2<sub>1</sub>/n</i>                                                          | <i>P2<sub>1</sub>/c</i>                                                         | <i>P2<sub>1</sub>/n</i>                                          |
| <i>a</i> (Å)                                                     | 9.6602(3)                                                                        | 9.8997(3)                                                                        | 10.2195(4)                                                                      | 9.9894(3)                                                        |
| <i>b</i> (Å)                                                     | 13.4897(4)                                                                       | 13.5956(4)                                                                       | 10.2608(5)                                                                      | 22.7931(7)                                                       |
| <i>c</i> (Å)                                                     | 18.9814(6)                                                                       | 18.9893(5)                                                                       | 21.3421(8)                                                                      | 11.6752(3)                                                       |
| $\alpha$ (deg)                                                   | 90                                                                               | 90                                                                               | 90                                                                              | 90                                                               |
| $\beta$ (deg)                                                    | 99.169(3)                                                                        | 99.627(2)                                                                        | 90.459(3)                                                                       | 93.968(3)                                                        |
| $\gamma$ (deg)                                                   | 90                                                                               | 90                                                                               | 90                                                                              | 90                                                               |
| Volume (Å <sup>3</sup> )                                         | 2441.92(13)                                                                      | 2519.82(13)                                                                      | 2237.87(16)                                                                     | 2651.95(13)                                                      |
| <i>Z</i>                                                         | 4                                                                                | 4                                                                                | 4                                                                               | 4                                                                |
| $\rho_{\text{calcd}}$ (Mg/m <sup>3</sup> )                       | 1.860                                                                            | 2.154                                                                            | 1.883                                                                           | 1.737                                                            |
| $\mu$ (Mo K $\alpha$ ) (mm <sup>-1</sup> )                       | 6.101                                                                            | 10.352                                                                           | 6.322                                                                           | 5.336                                                            |
| <i>F</i> (000)                                                   | 1320                                                                             | 1536                                                                             | 1224                                                                            | 1360                                                             |
| $\theta$ range (deg)                                             | 3.595–26.372                                                                     | 3.569–26.372                                                                     | 3.391–26.372                                                                    | 3.306–26.367                                                     |
| No. of reflns collected                                          | 33882                                                                            | 34866                                                                            | 29916                                                                           | 36627                                                            |
| No. of reflns used                                               | 4974                                                                             | 5136                                                                             | 4562                                                                            | 5400                                                             |
| Parameters                                                       | 298                                                                              | 264                                                                              | 346                                                                             | 343                                                              |
| R <sub>1</sub> [ <i>I</i> >2 $\sigma$ ( <i>I</i> )] <sup>a</sup> | 0.0460                                                                           | 0.0690                                                                           | 0.0387                                                                          | 0.0401                                                           |
| wR <sub>2</sub> (all reflns) <sup>b</sup>                        | 0.1141                                                                           | 0.2107                                                                           | 0.0899                                                                          | 0.0730                                                           |
| Goof on <i>F</i> <sup>2</sup> <sup>c</sup>                       | 1.049                                                                            | 0.932                                                                            | 1.095                                                                           | 1.194                                                            |
| Largest diff. peak and hole, (e·Å <sup>-3</sup> )                | 2.406/–1.348                                                                     | 2.031/–0.895                                                                     | 1.619/–1.545                                                                    | 0.836/–0.764                                                     |

$$^a R_1 = \frac{\sum ||F_o| - |F_c||}{\sum |F_o|}; ^b wR_2 = \{\frac{\sum [w(F_o^2 - F_c^2)^2]}{\sum [w(F_o^2)^2]}\}^{1/2}; ^c S = \{\frac{\sum [w(F_o^2 - F_c^2)^2]}{(n-p)}\}^{1/2}$$

**Table S3** Selected bond distances (Å) of **11**, and **13**·0.5 toluene

|             | <b>11</b>  | <b>12</b> <sup>§</sup> | <b>13</b> ·0.5 toluene <sup>§</sup> |
|-------------|------------|------------------------|-------------------------------------|
| Pt(1)-C(15) | 1.9853(19) | 1.973(11)/1.973(11)    | 1.992(8)/1.998(9)                   |
| Pt(1)-N(1)  | 2.0090(15) | 2.012(8)/2.015(8)      | 1.996(8)/1.995(6)                   |
| Pt(1)-O(1)  | 2.0131(14) | 2.015(6)/1.997(7)      | 2.015(7)/2.019(5)                   |
| Pt(1)-O(2)  | 2.0933(14) | 2.077(8)/2.071(7)      | 2.086(6)/2.089(6)                   |
| N(1)-C(1)   | 1.308(2)   | 1.312(12)/1.303(12)    | 1.302(12)/1.304(9)                  |
| N(3)-C(1)   | 1.344(2)   | 1.351(13)/1.357(13)    | 1.340(10)/1.360(9)                  |
| N(2)-C(1)   | 1.370(2)   | 1.391(12)/1.380(12)    | 1.367(12)/1.369(9)                  |

<sup>§</sup>Two molecules per asymmetric unit were found in the crystal lattice.

**Table S4** Selected bond distances (Å) of **14–18**

|             | <b>14</b> | <b>15</b> | <b>16</b> | <b>17</b> | <b>18</b> |
|-------------|-----------|-----------|-----------|-----------|-----------|
| Pt(1)-C(15) | 1.998(7)  | 1.986(10) | 1.975(7)  | 2.010(8)  | 1.984(6)  |
| Pt(1)-N(1)  | 2.001(5)  | 2.005(8)  | 2.005(5)  | 2.008(11) | 2.012(5)  |
| Pt(1)-O(1)  | 2.004(4)  | 2.007(8)  | 2.016(5)  | 2.027(9)  | 2.016(4)  |
| Pt(1)-O(2)  | 2.098(4)  | 2.074(8)  | 2.083(5)  | 2.091(10) | 2.075(4)  |
| N(1)-C(1)   | 1.278(8)  | 1.310(12) | 1.289(8)  | 1.346(17) | 1.303(7)  |
| N(3)-C(1)   | 1.373(8)  | 1.332(12) | 1.356(9)  | 1.300(19) | 1.339(8)  |
| N(2)-C(1)   | 1.362(8)  | 1.357(14) | 1.368(9)  | 1.396(19) | 1.355(7)  |



**Table S5** Selected bond distances (Å) of **19**.

|             |          |
|-------------|----------|
| Pt(1)-C(15) | 1.993(5) |
| Pt(1)-N(1)  | 2.007(4) |
| Pt(1)-N(4)  | 2.009(4) |
| Pt(1)-O(4)  | 2.121(4) |
| N(1)-C(1)   | 1.315(6) |
| N(3)-C(1)   | 1.362(6) |
| N(2)-C(1)   | 1.362(6) |

**Table S6** Bond angles (deg) of **11–13**

|                  | <b>11</b>  | <b>12</b> <sup>§</sup> | <b>13</b> ·0.5 toluene <sup>§</sup> |
|------------------|------------|------------------------|-------------------------------------|
| C(15)-Pt(1)-N(1) | 91.80(7)   | 92.9(4)/91.4(4)        | 92.1(4)/92.3(3)                     |
| C(15)-Pt(1)-O(1) | 89.48(7)   | 88.3(4)/88.9(4)        | 90.3(3)/89.9(3)                     |
| N(1)-Pt(1)-O(1)  | 174.43(6)  | 178.2(4)/178.3(4)      | 177.5(3)/177.8(3)                   |
| C(15)-Pt(1)-O(2) | 178.06(6)  | 179.8(4)/178.2(4)      | 177.0(3)/179.5(3)                   |
| N(1)-Pt(1)-O(2)  | 88.51(6)   | 87.3(4)/88.8(3)        | 87.9(3)/87.8(3)                     |
| O(1)-Pt(1)-O(2)  | 90.39(6)   | 91.6(3)/90.8(3)        | 89.7(3)/90.0(2)                     |
| N(1)-C(1)-N(3)   | 122.62(17) | 124.0(11)/121.9(11)    | 122.1(10)/122.0(8)                  |
| N(1)-C(1)-N(2)   | 122.77(17) | 119.6(11)/122.2(11)    | 122.9(9)/122.9(8)                   |
| N(3)-C(1)-N(2)   | 114.60(18) | 116.4(11)/115.8(11)    | 115.0(10)/115.1(8)                  |

<sup>§</sup>Two molecules per asymmetric unit were found in the crystal lattice.

**Table S7** Bond angles (deg) of **14–18**

|                  | <b>14</b> | <b>15</b> | <b>16</b> | <b>17</b> | <b>18</b>  |
|------------------|-----------|-----------|-----------|-----------|------------|
| C(15)-Pt(1)-N(1) | 88.5(2)   | 92.0(3)   | 91.4(2)   | 92.5(4)   | 91.9(2)    |
| C(15)-Pt(1)-O(1) | 90.4(2)   | 88.5(4)   | 90.8(3)   | 89.2(4)   | 89.6(2)    |
| N(1)-Pt(1)-O(1)  | 176.2(2)  | 179.2(3)  | 177.8(2)  | 178.3(4)  | 178.40(19) |
| C(15)-Pt(1)-O(2) | 177.1(2)  | 179.1(4)  | 179.5(2)  | 178.2(4)  | 177.26(18) |
| N(1)-Pt(1)-O(2)  | 90.5(2)   | 88.9(3)   | 88.3(2)   | 87.9(4)   | 89.20(17)  |
| O(1)-Pt(1)-O(2)  | 90.39(19) | 90.6(4)   | 89.5(2)   | 90.5(4)   | 89.24(17)  |
| N(1)-C(1)-N(3)   | 121.3(6)  | 122.3(9)  | 122.9(6)  | 123.5(15) | 123.4(5)   |
| N(1)-C(1)-N(2)   | 124.6(6)  | 121.9(8)  | 121.0(7)  | 118.6(16) | 120.9(6)   |
| N(3)-C(1)-N(2)   | 114.1(6)  | 115.8(9)  | 116.2(6)  | 117.9(13) | 115.6(5)   |

**Table S8** Bond Angles (deg) of **19**.

|                  |            |
|------------------|------------|
| C(15)-Pt(1)-N(1) | 88.23(19)  |
| C(15)-Pt(1)-N(4) | 99.1(2)    |
| N(1)-Pt(1)-O(4)  | 93.07 (15) |
| N(4)-Pt(1)-O(4)  | 80.12(17)  |
| C(15)-Pt(1)-O(4) | 174.70(17) |
| N(1)-Pt(1)-N(4)  | 170.90(16) |
| N(1)-C(1)-N(3)   | 121.4(5)   |
| N(1)-C(1)-N(2)   | 121.7(4)   |
| N(3)-C(1)-N(2)   | 116.8(5)   |

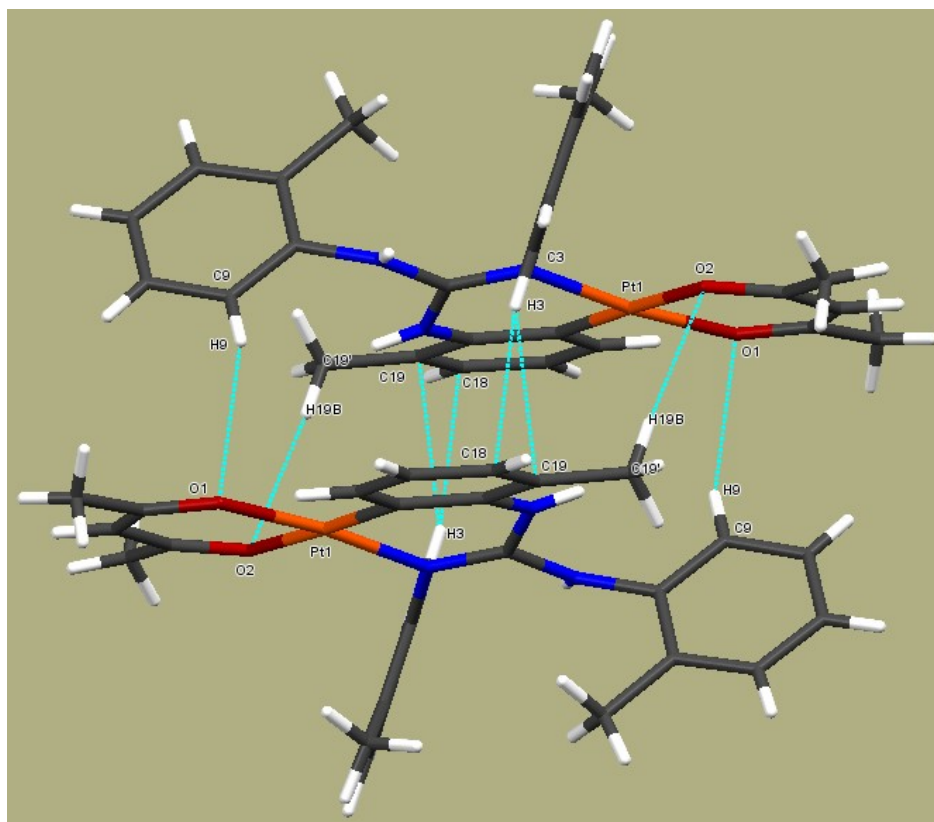

**Fig. S1** Crystal packing diagram of **11**, illustrating intermolecular interactions. The intermolecular distances (Å) and angles (deg.) are: (i) C9...O1 = 3.247, H9...O1 = 2.545 and C9–H9–O1 = 136.63. (ii) C19'...O2 = 3.553, O2...H19B = 2.611 and C19'–H19B–O2 = 174.27. (iii) C3...C18 = 3.713, H3...C18 = 2.814, C3–H3–C18 = 160.88. (iv) C3...C19 = 3.616, H3...C19 = 2.751, C3–H3–C19 = 153.71. In **11**, the reference molecule and inversion related adjacent molecule are linked by C–H...O and C–H... $\pi$  interactions.

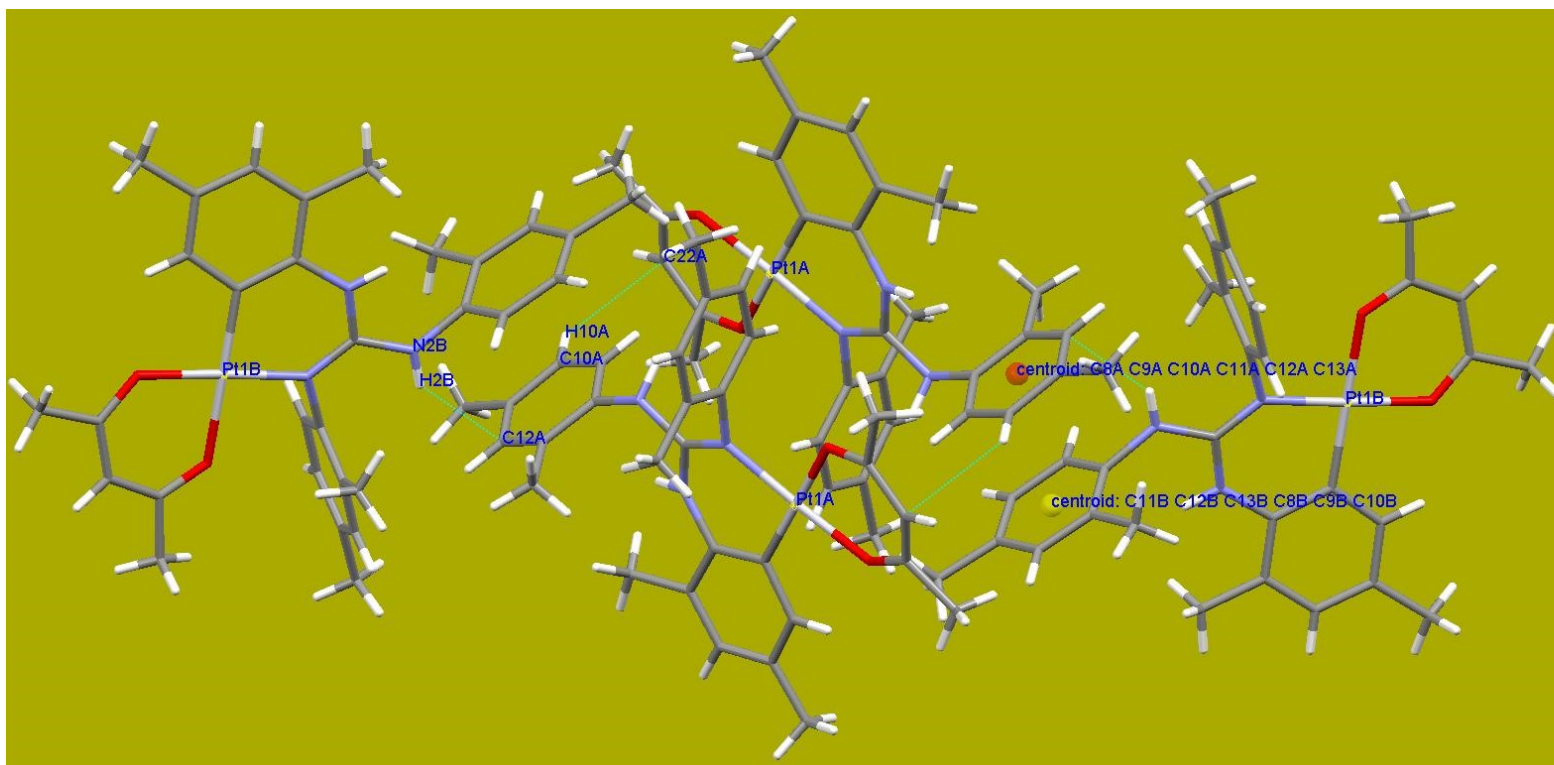

**Fig. S2** Crystal packing diagram of **13**·0.5 toluene, illustrating intermolecular interactions. Toluene is omitted for clarity. The intermolecular distances (Å) and angles (deg.) are: (i) C12A···N2B = 3.414, H2B···C12A = 2.691 and C12A–H2B–N2B = 142.68. (ii) C10A···C22A = 3.650, C22A···H10A = 2.897 and C710A–H10A–C22A = 138.84. In **13**·0.5 toluene, there are two molecules in an asymmetric unit ( $Z' = 2$ ). These two molecules are linked by N–H··· $\pi$  and  $\pi$ ··· $\pi$  interactions.

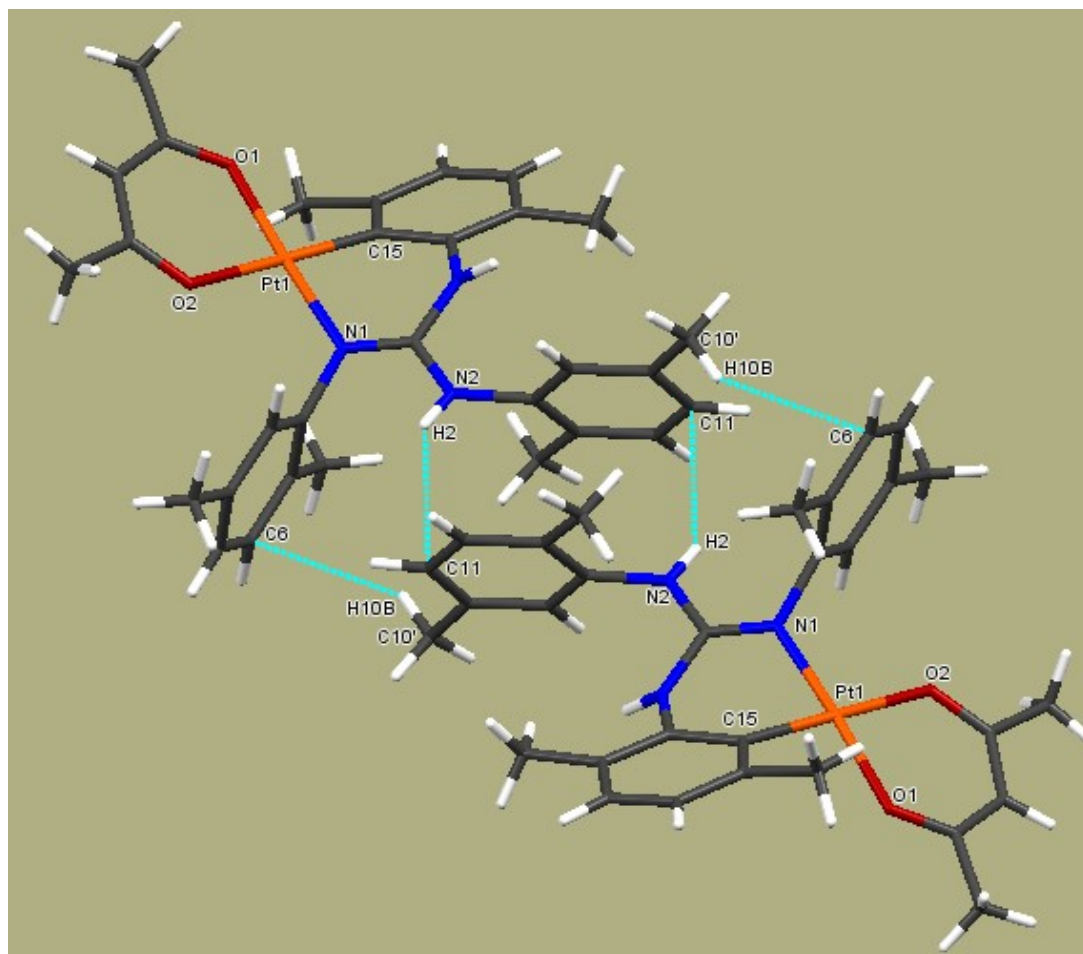

**Fig. S3** Crystal packing diagram of **14**, illustrating intermolecular interactions. The intermolecular distances (Å) and angles (deg.) are: (i)  $C6 \cdots C10' = 3.710$ ,  $H10B \cdots C6 = 2.893$  and  $C6-H10B-C10' = 143.64$ . (ii)  $N2 \cdots C11 = 3.563$ ,  $C11 \cdots H2 = 2.837$  and  $N2-H2-C11 = 143.34$ . In **14**, the reference and inversion related adjacent molecules are linked by one pair of  $N-H \cdots \pi$  and one pair of  $C-H \cdots \pi$  interactions to form a dimer.

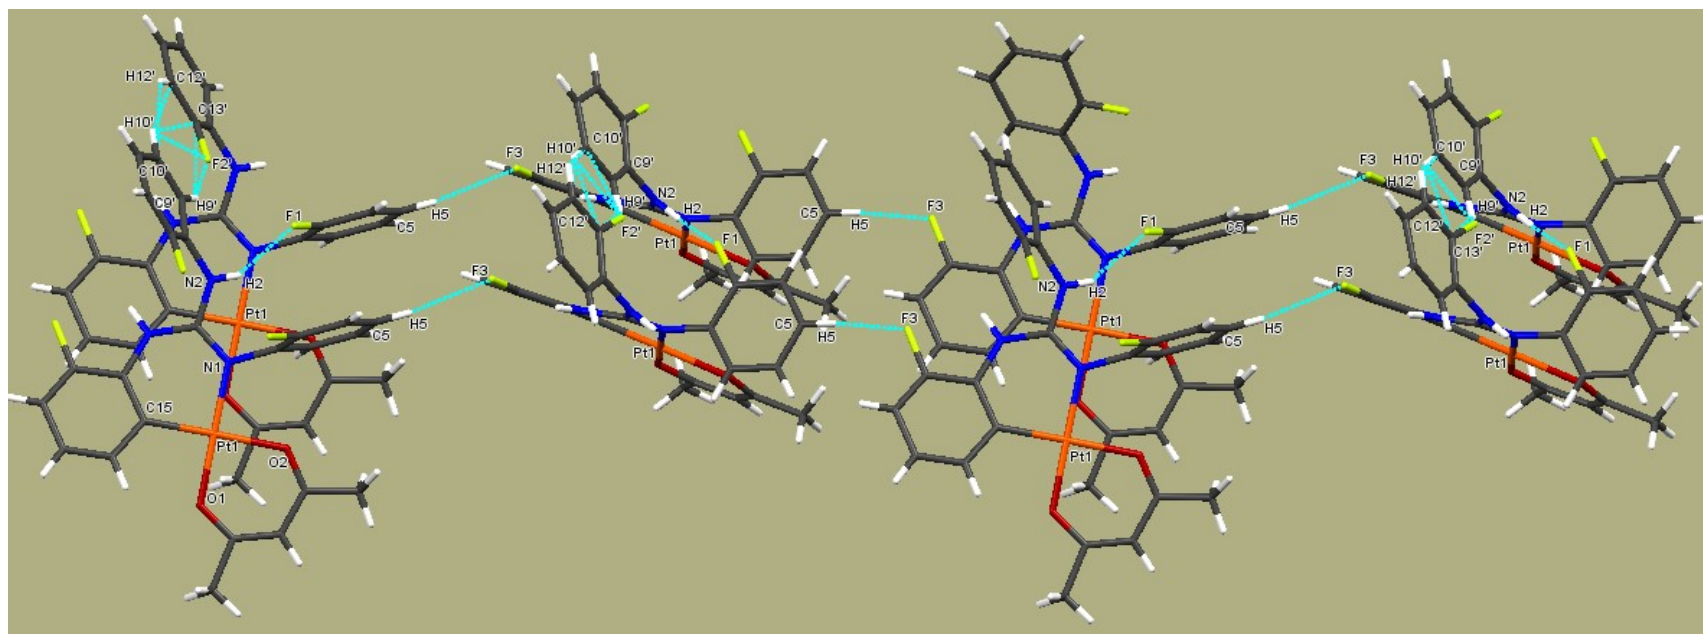

**Fig. S4** Crystal packing diagram of **15**, illustrating intermolecular interactions. The intermolecular distances (Å) and angles (deg.) are: (i) C5...F3 = 3.371, H5...F3 = 2.454 and C5–H5–F3 = 168.59. (ii) C24...F2 = 3.092, F2...H24B = 2.338 and F2–C24B–C24 = 134.72. (iii) N2...F1 = 3.086, F1...H2 = 2.304 and N2–H2–F1 = 151.52. (iv) C9...C14 = 3.545, C14...H9 = 2.854 and C9–H9–C14 = 131.94. (v) C9...C19 = 3.471, C19...H9 = 2.652 and C9–H9–C19 = 147.26. The rotational disorder of one of the aryl rings in **15** precluded our discussion about the intermolecular interactions in the crystal lattice.

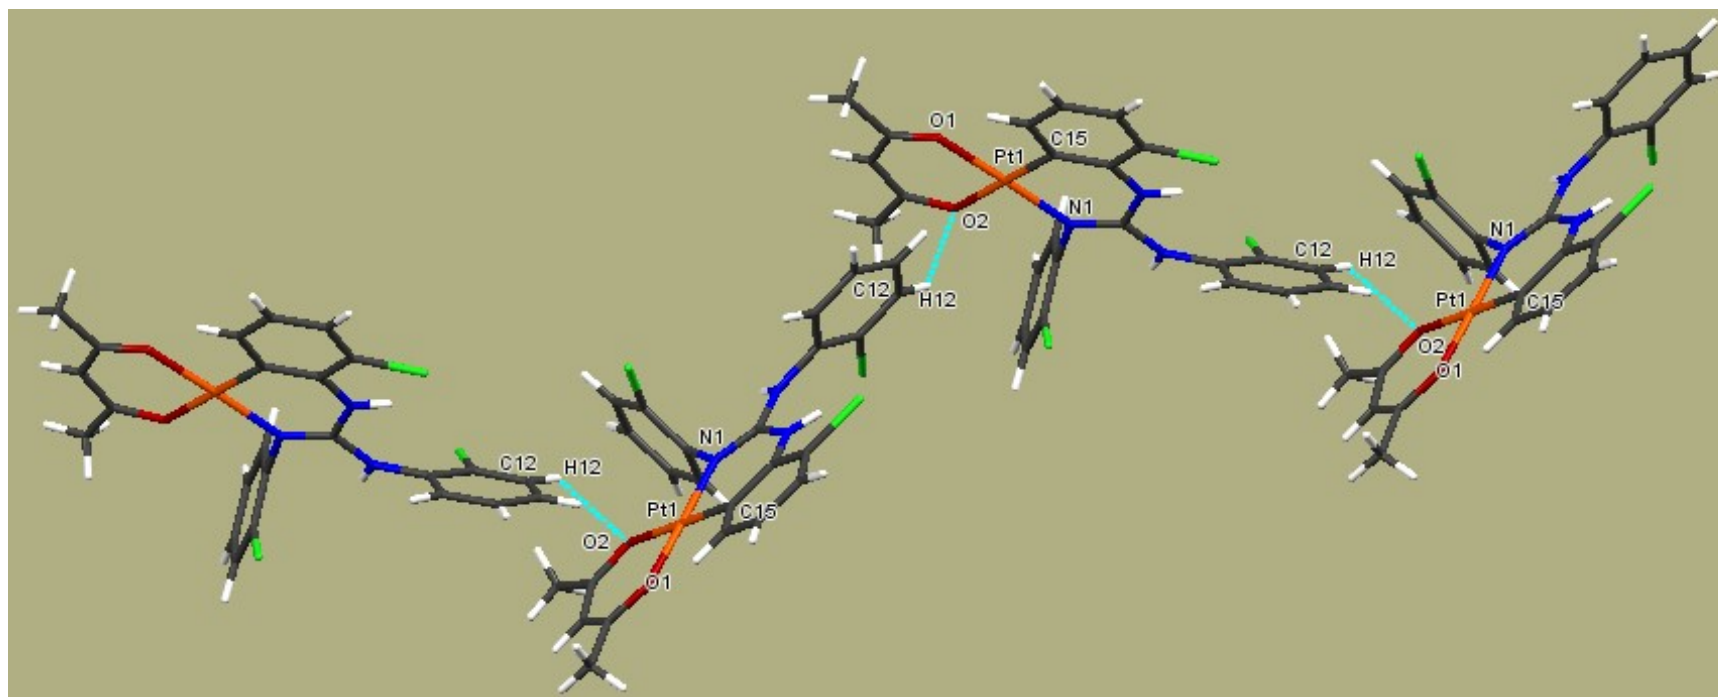

**Fig. S5** Crystal packing diagram of **16**, illustrating intermolecular interactions. The intermolecular distances (Å) and angles (deg.) are: (i) C12...O2 = 3.490, H12...O2 = 2.718 and C12-H12-O2 = 140.98. In the crystal lattice of **16**, the reference molecule is linked to the neighboring molecules only via intermolecular C-H...O hydrogen bond leading to the formation of a one-dimensional chain.

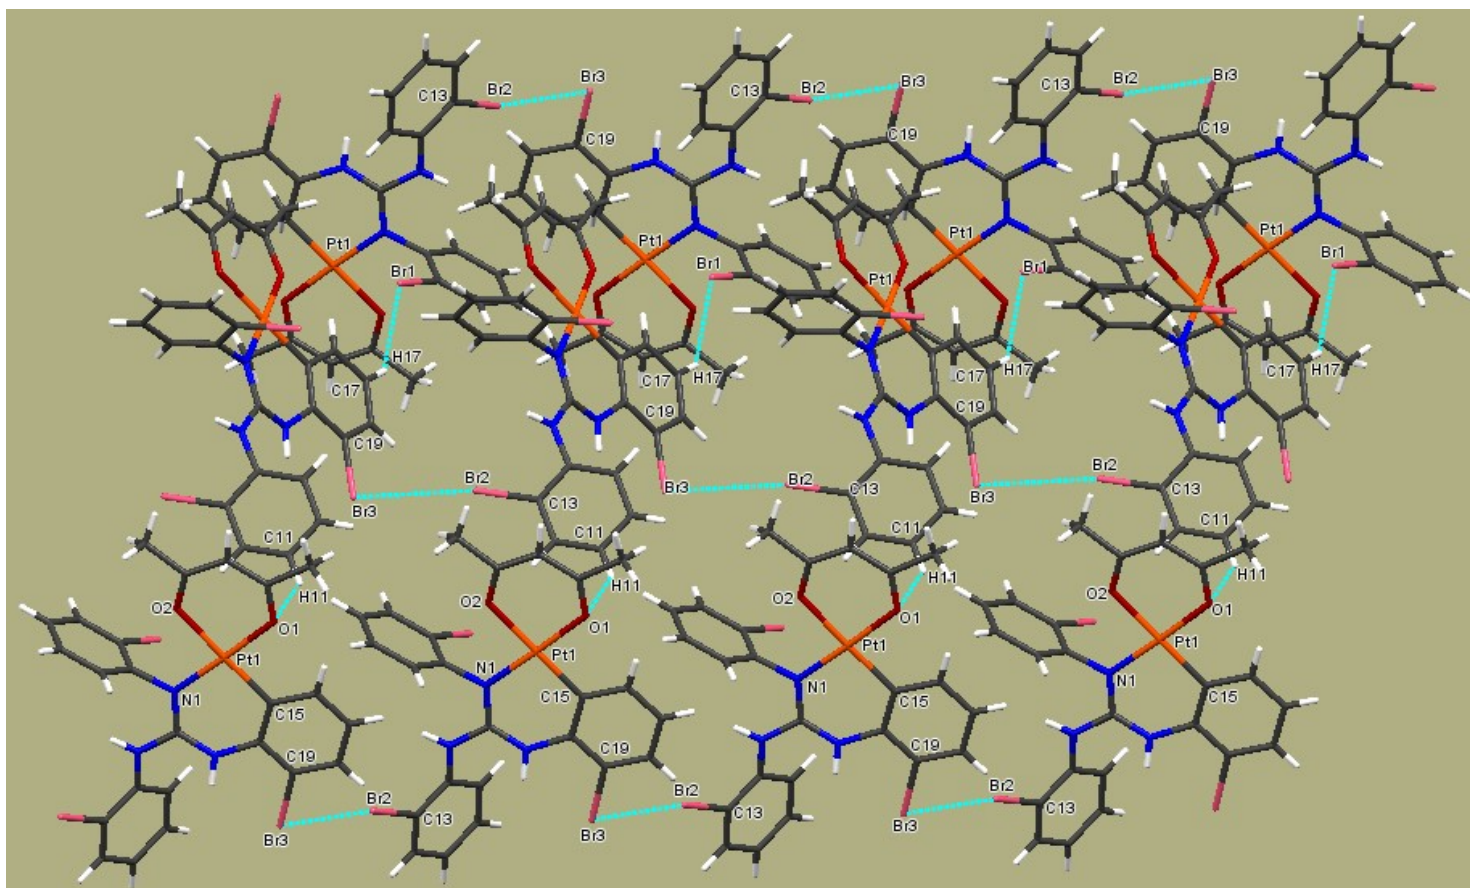

**Fig. S6** Crystal packing diagram of **17**, illustrating intermolecular interactions. The intermolecular distances (Å) and angles (deg.) are: (i) Br2...Br3 = 3.634, C13–Br2–Br3 = 168.15, C19–Br3–Br2 = 94.52. (ii) O1...C11 = 3.311, O1...H11 = 2.700 and C11–H11–O1 = 124.02. (iii) Br1...C17 = 3.676, Br1...H17 = 2.962 and Br1–H17–C17 = 134.68. In **17**, the reference molecule is linked to two adjacent identical molecules via type II halogen bond<sup>14</sup> to form a one-dimensional chain and this chain is linked to two adjacent chains related by screw axis and glide plane via C–H...Br and C–H...O hydrogen bonds respectively and thus forms a two-dimensional layer structure. Halogen bonding in weakly luminescent platinumacycle, [Pt(ND- $\kappa$ C, $\kappa$ N)(Cl)(PPh<sub>3</sub>)] derived from 2-(2-benzothienyl)pyridine and IC<sub>6</sub>F<sub>5</sub>/I<sub>2</sub>C<sub>6</sub>F<sub>4</sub> were shown to amplify photophysical performance of the resulting adducts formed from the aforementioned pair.<sup>15</sup>



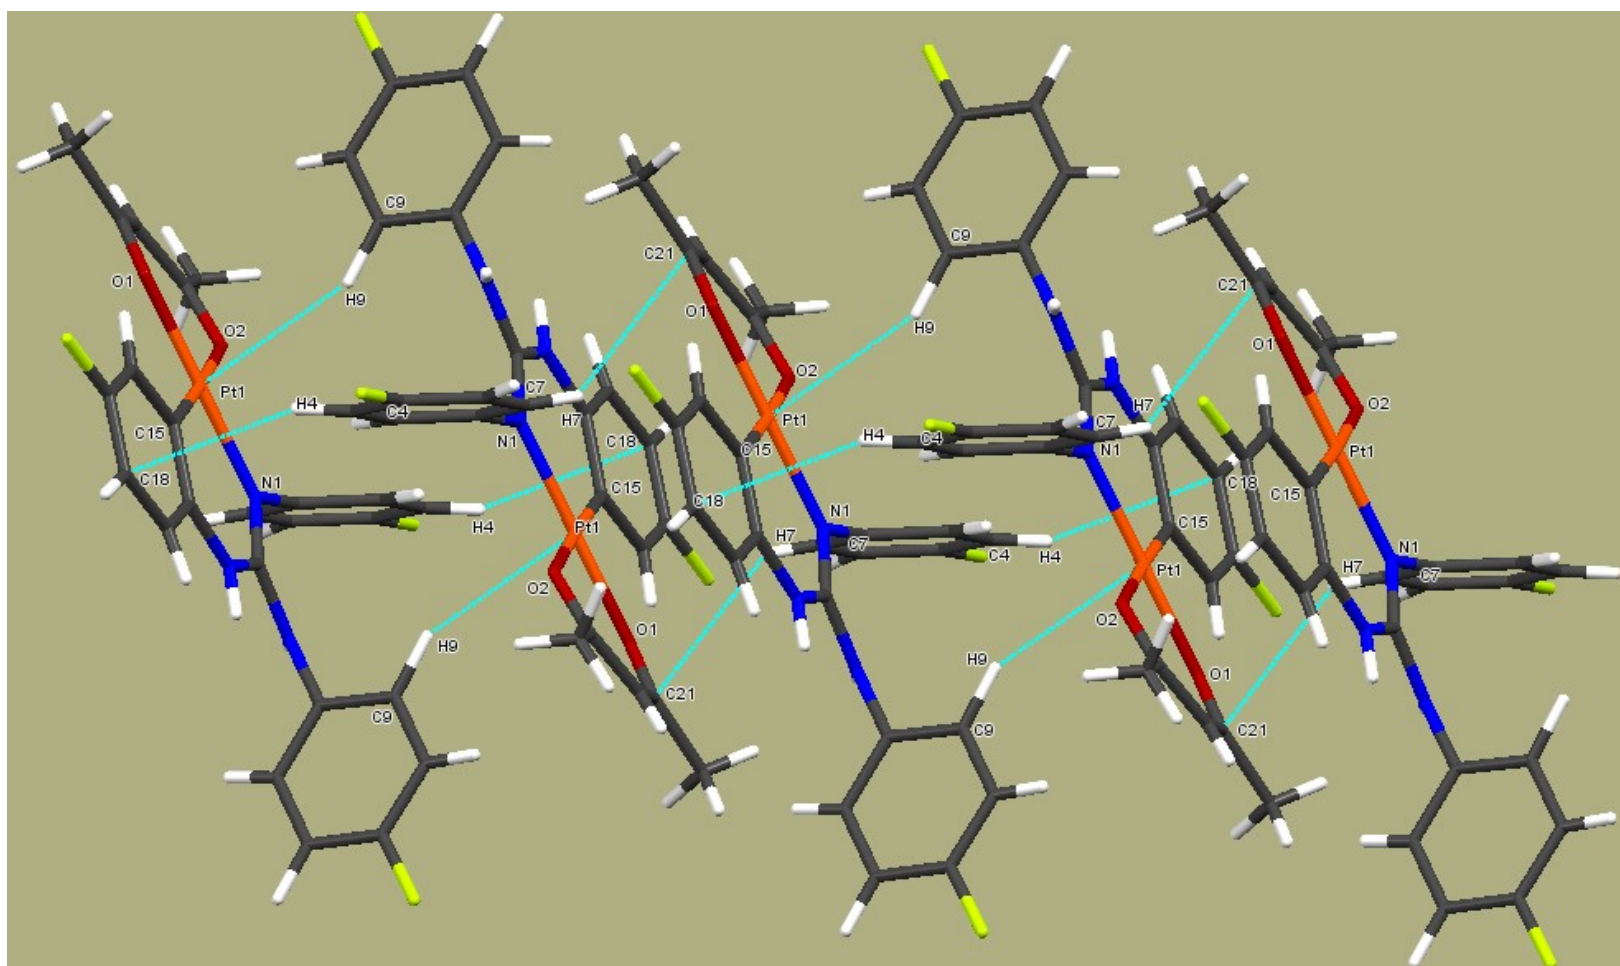

**Fig. S7** Crystal packing diagram of **18**, illustrating intermolecular interactions. The intermolecular distances (Å) and angles (deg.) are: (i) Pt1...C9 = 3.863, Pt1...H9 = 2.876, Pt1–H9–C9 = 152.47. (ii) C7...C21 = 3.551, C21...H7 = 2.896 and C7–H7–C21 = 135.72. (iii) C4...C18 = 3.740, C18...H4 = 2.895 and C18–H4–C4 = 156.81. In **18**, the F atom in 4<sup>th</sup> position of the N(H)Ar unit simultaneously acts as a bifurcated acceptor, one involving type II halogen bond with the inversion related adjacent molecule and the other involving N–H...F hydrogen bond with the adjacent molecule related by screw axis. The reference molecule and inversion related adjacent molecule are linked by a pair of C–H...Pt interactions.

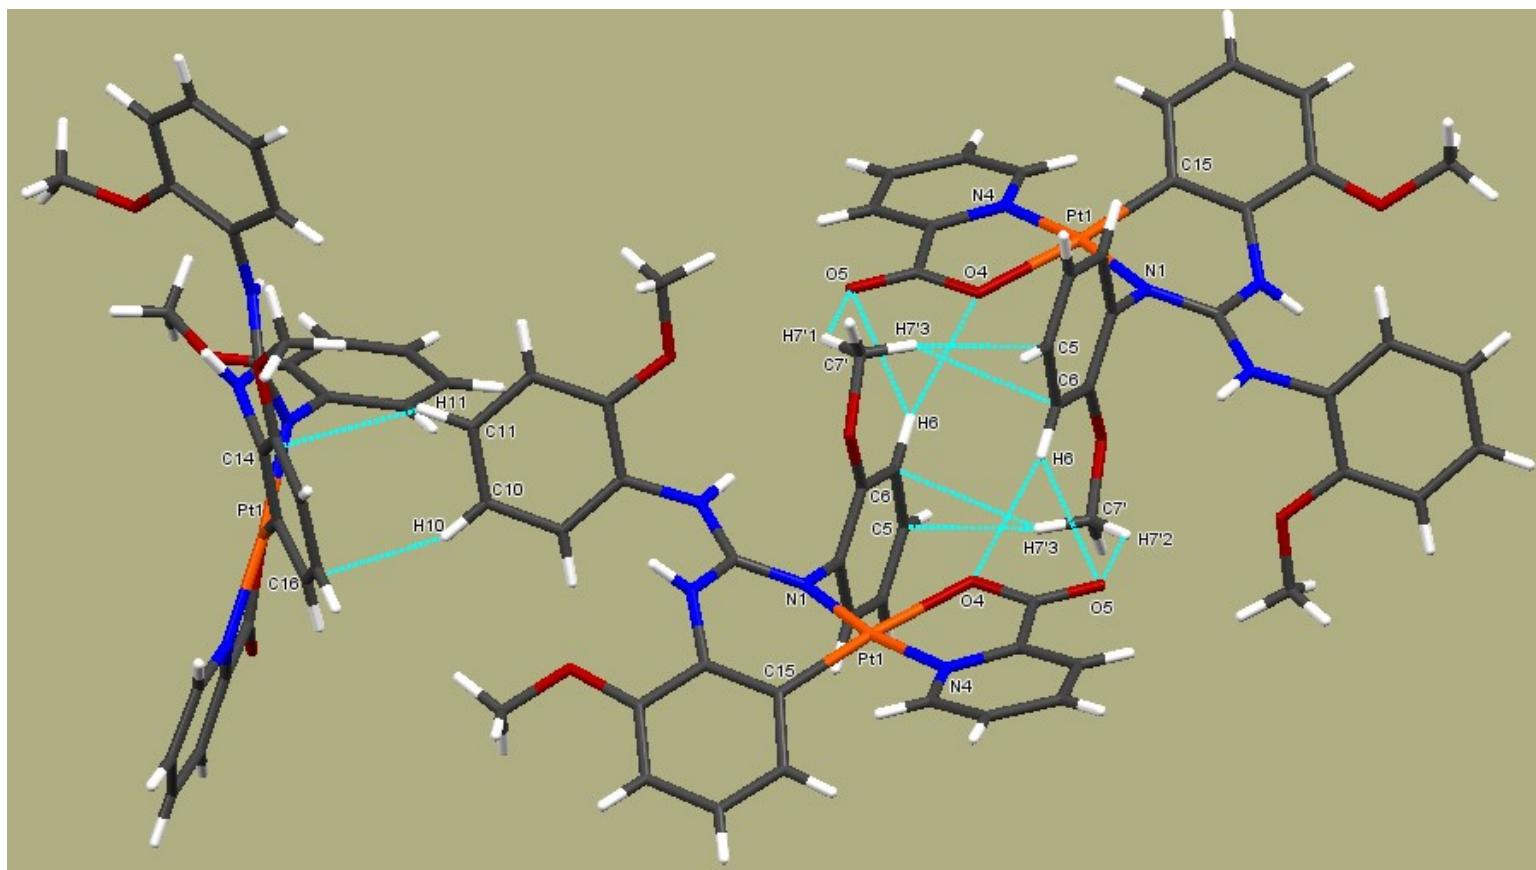

**Fig. S8** Crystal packing diagram of **19**, illustrating intermolecular interactions. The intermolecular distances (Å) and angles (deg.) are: (i) C11...H11 = 0.931, H11...C14 = 2.858 and C14–H11–C11 = 145.70. (ii) C10...H10 = 0.929, H10...C16 = 2.712 and C16–H10–C10 = 143.17. (iii) C7'...H7'1 = 0.960 Å, H7'1...O5 = 2.700 and O5–H7'1–C7' = 132.44. (iv) C6...H6 = 0.930, H6...O5 = 2.705 and O5–H6–C6 = 139.47. (v) C6...H6 = 0.930, H6...O4 = 2.611 and O4–H6–C6 = 167.19. (vi) C7'...H7'3 = 0.960, H7'3...C5 = 2.882 and C5–H7'3–C7' = 126.67°. (vii) C7'...H7'3 = 0.960, H7'3...C6 = 2.805 and C6–H7'3–C7' = 134.94. In **19**, the reference molecule is linked to the adjacent molecule related by an inversion symmetry through a pair of bifurcated C–H...O, normal C–H...O hydrogen bonds and a pair of C–H... $\pi$  interactions on one side and through a pair of C–H... $\pi$  interactions with the glide related adjacent molecule on the other side.

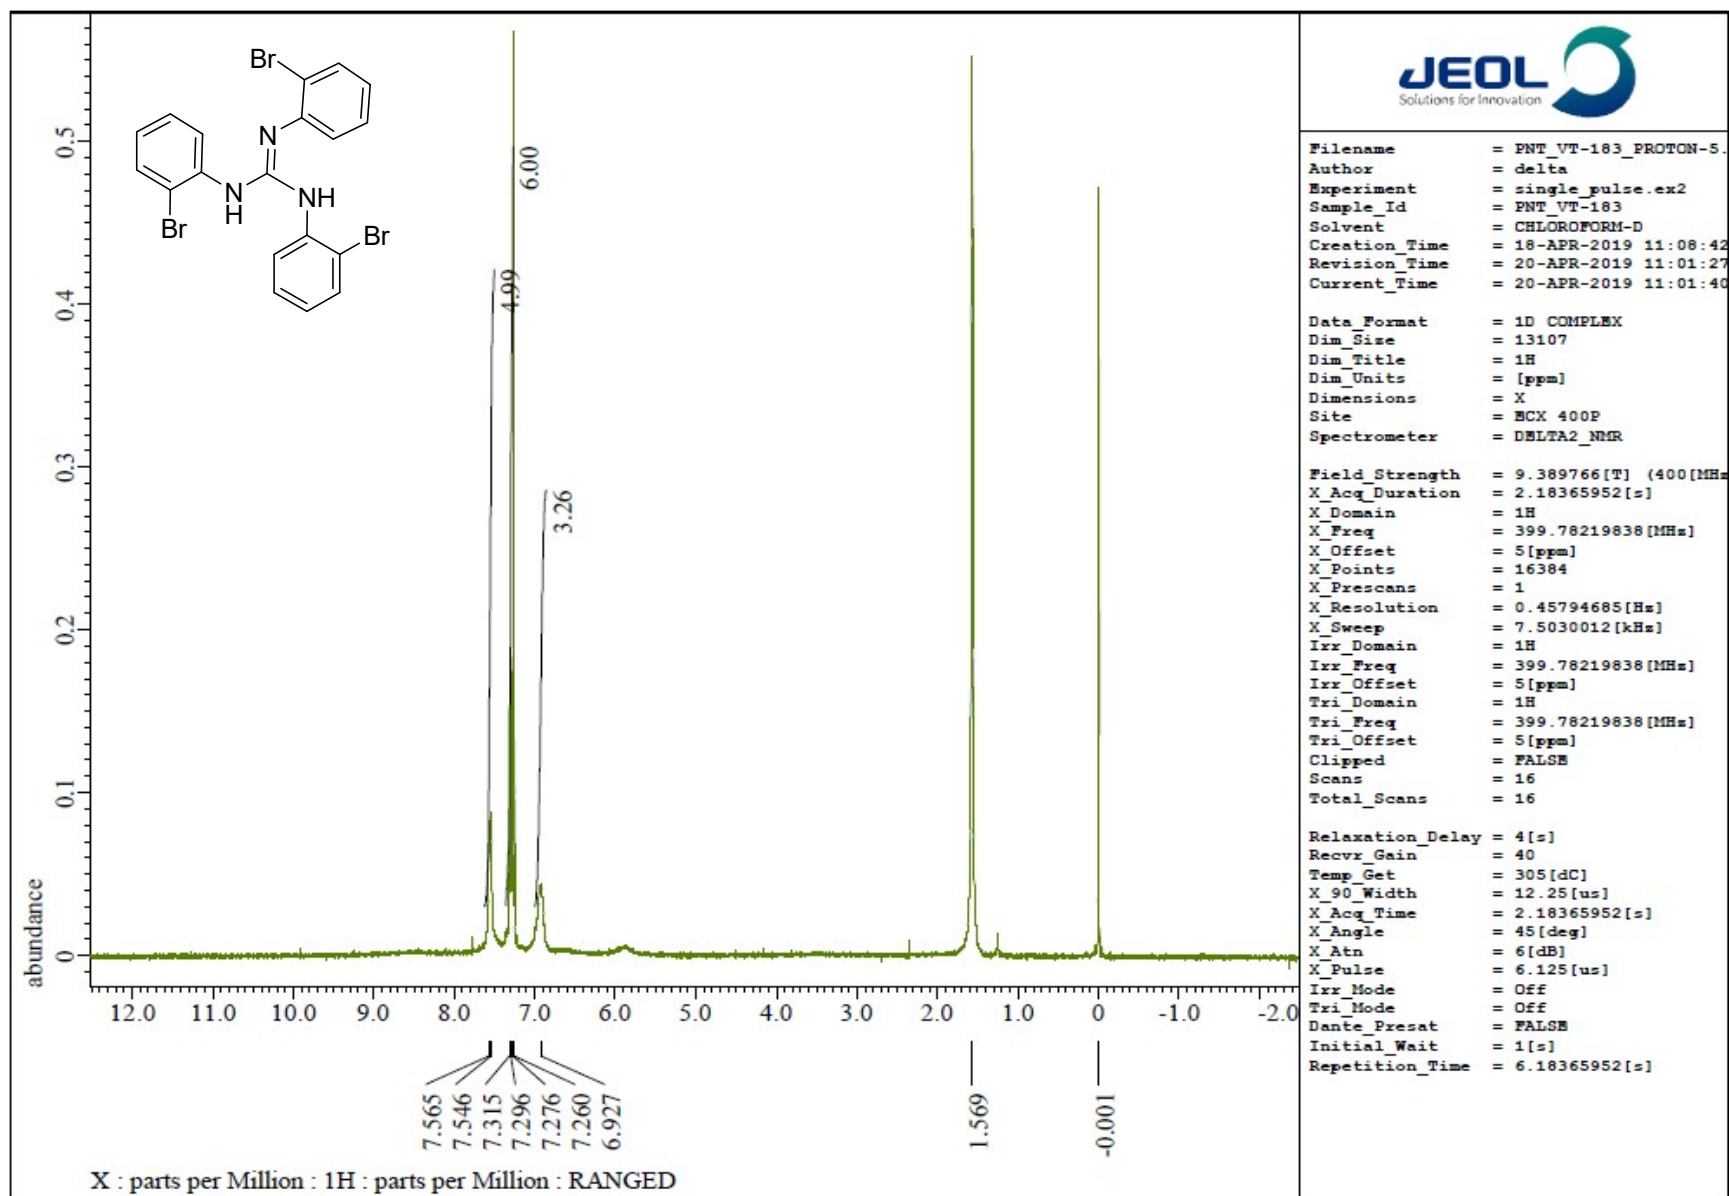

Fig. S9 <sup>1</sup>H NMR (CDCl<sub>3</sub>, 400 MHz) spectrum of [ArN=C(N(H)Ar)<sub>2</sub>] (Ar = 2-BrC<sub>6</sub>H<sub>4</sub>).

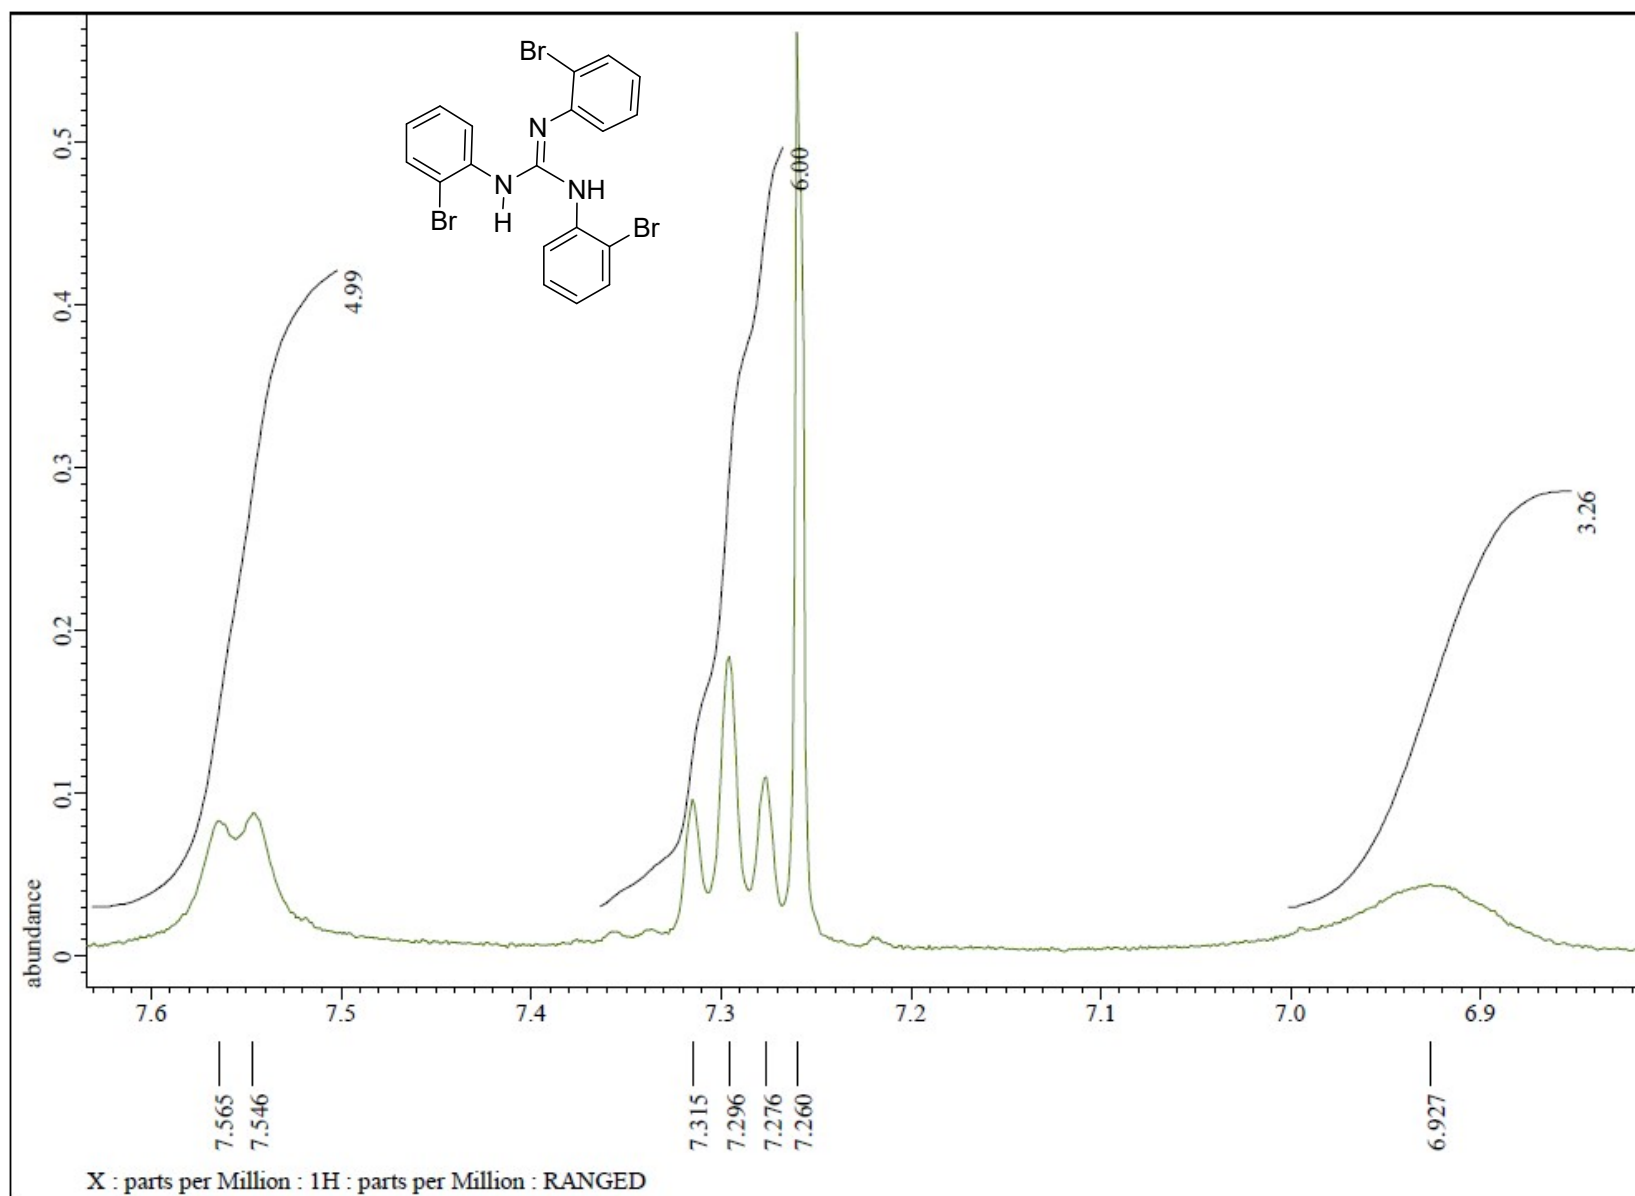

**Fig. S10** <sup>1</sup>H NMR (CDCl<sub>3</sub>, 400 MHz) spectrum of [ArN=C(N(H)Ar)<sub>2</sub>] (Ar = 2-BrC<sub>6</sub>H<sub>4</sub>) in the indicated region.

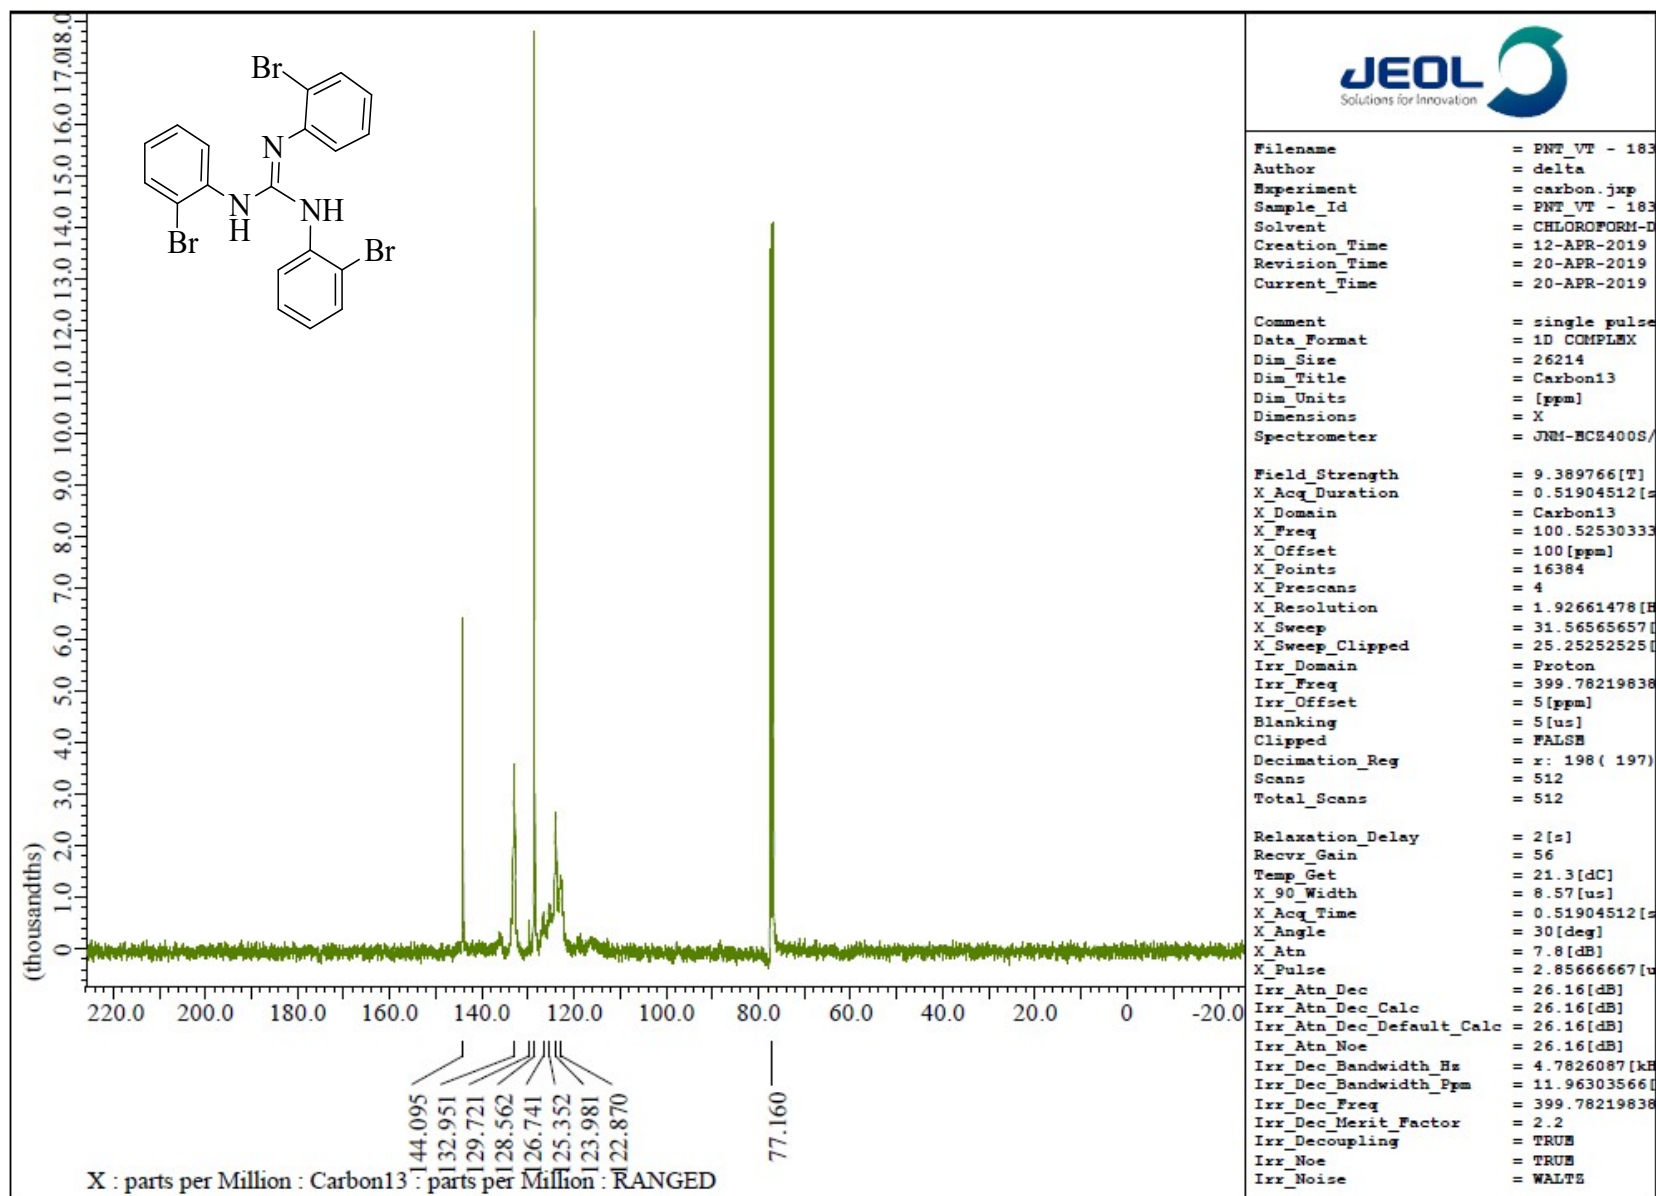

Fig. S11  $^{13}\text{C}\{^1\text{H}\}$ NMR ( $\text{CDCl}_3$ , 100.5 MHz) spectrum of  $[\text{ArN}=\text{C}(\text{N}(\text{H})\text{Ar})_2]$  ( $\text{Ar} = 2\text{-BrC}_6\text{H}_4$ ).

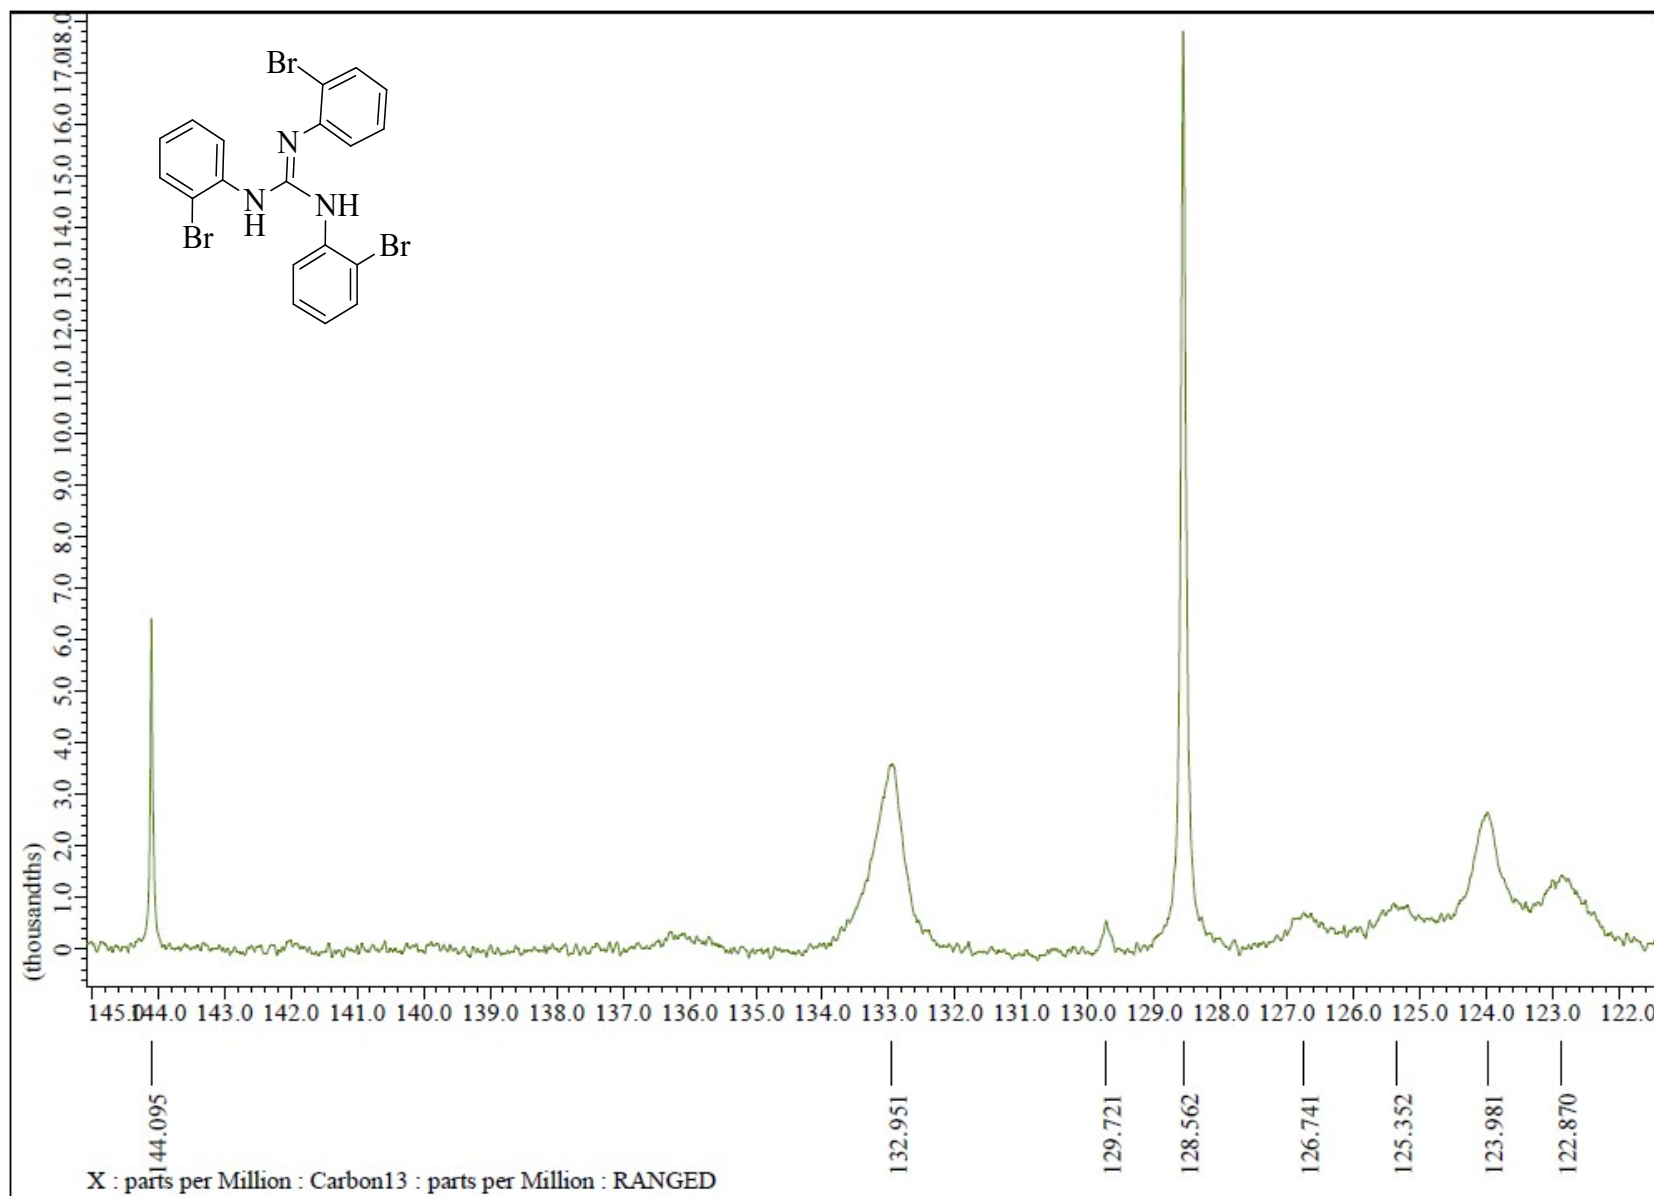

**Fig. S12**  $^{13}\text{C}\{^1\text{H}\}$  NMR ( $\text{CDCl}_3$ , 100.5 MHz) spectrum of  $[\text{ArN}=\text{C}(\text{N}(\text{H})\text{Ar})_2]$  ( $\text{Ar} = 2\text{-BrC}_6\text{H}_4$ ) in the indicated region.

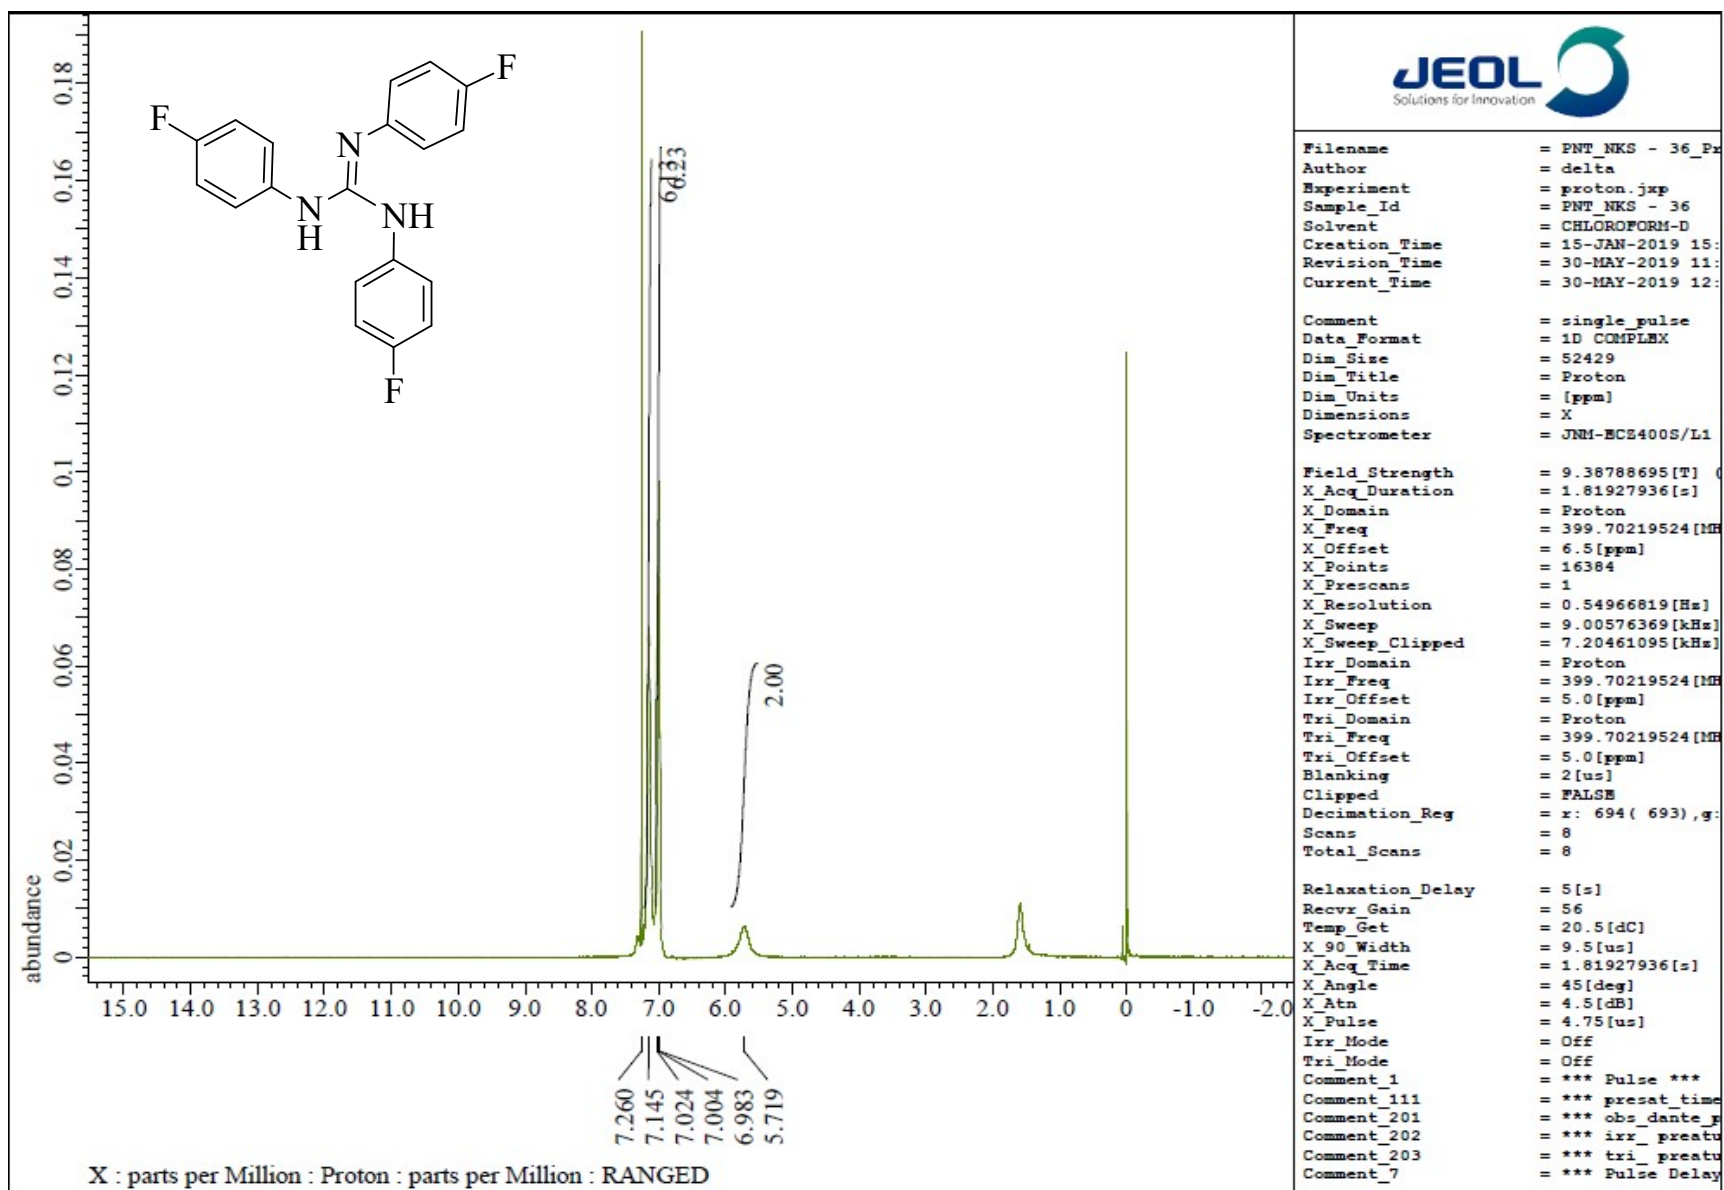

Fig. S13 <sup>1</sup>H NMR (CDCl<sub>3</sub>, 400 MHz) spectrum of [ArN=C(N(H)Ar)<sub>2</sub>] (Ar = 4-FC<sub>6</sub>H<sub>4</sub>).

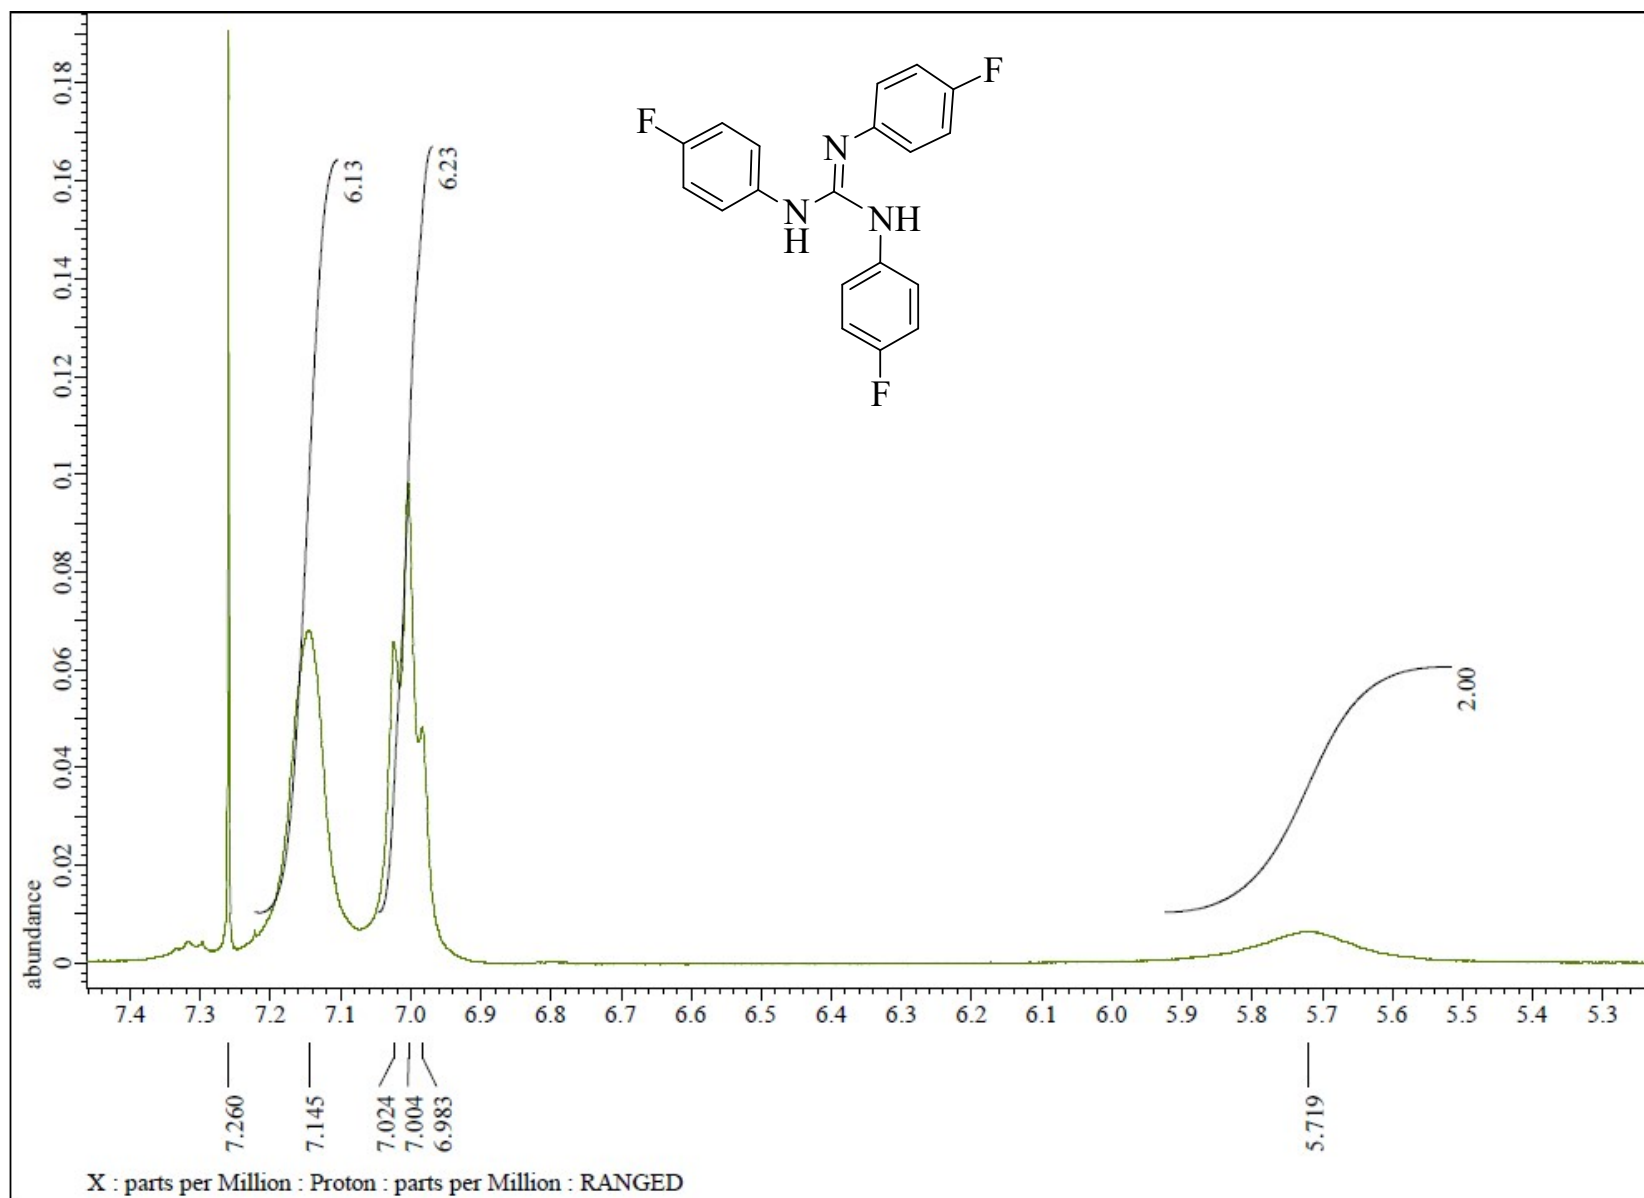

**Fig. S14** <sup>1</sup>H NMR (CDCl<sub>3</sub>, 400 MHz) spectrum of [ArN=C(N(H)Ar)<sub>2</sub>] (Ar = 4-FC<sub>6</sub>H<sub>4</sub>) in the indicated region.



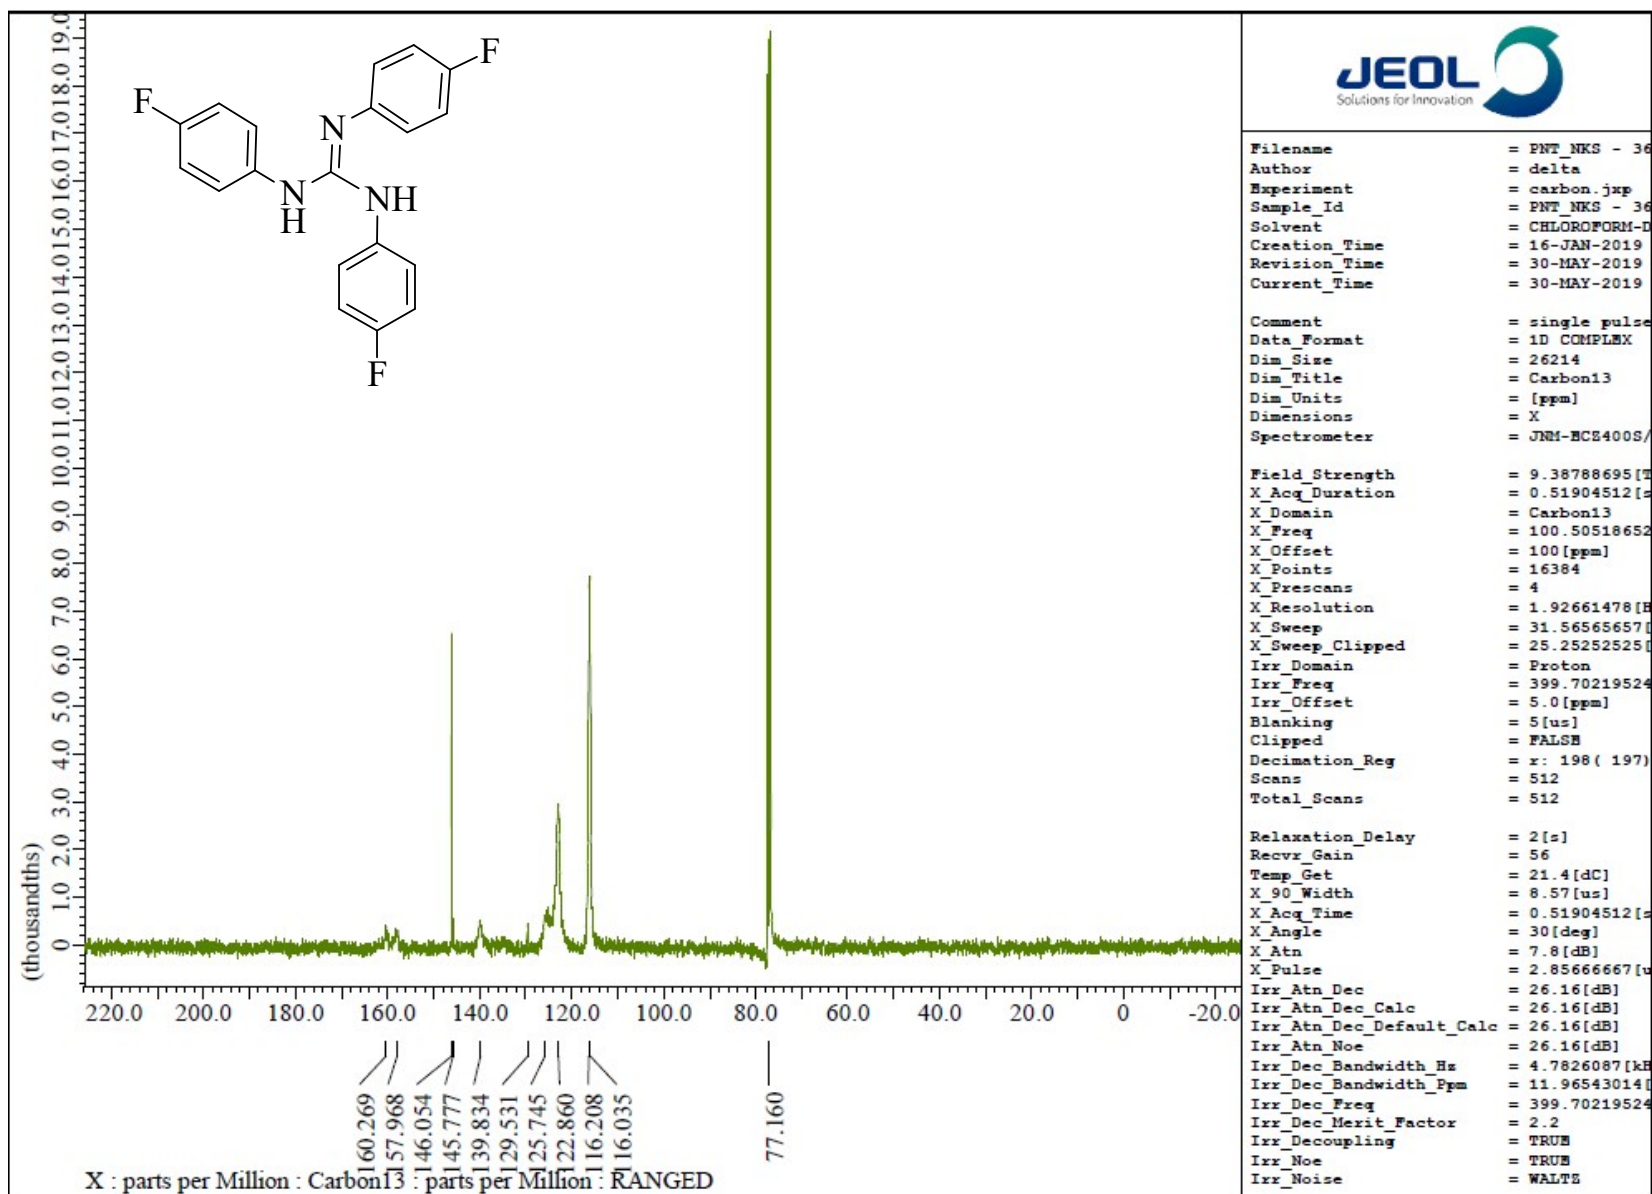

Fig. S15  $^{13}\text{C}\{^1\text{H}\}$  NMR ( $\text{CDCl}_3$ , 100.5 MHz) spectrum of  $[\text{ArN}=\text{C}(\text{N}(\text{H})\text{Ar})_2]$  ( $\text{Ar} = 4\text{-FC}_6\text{H}_4$ ).

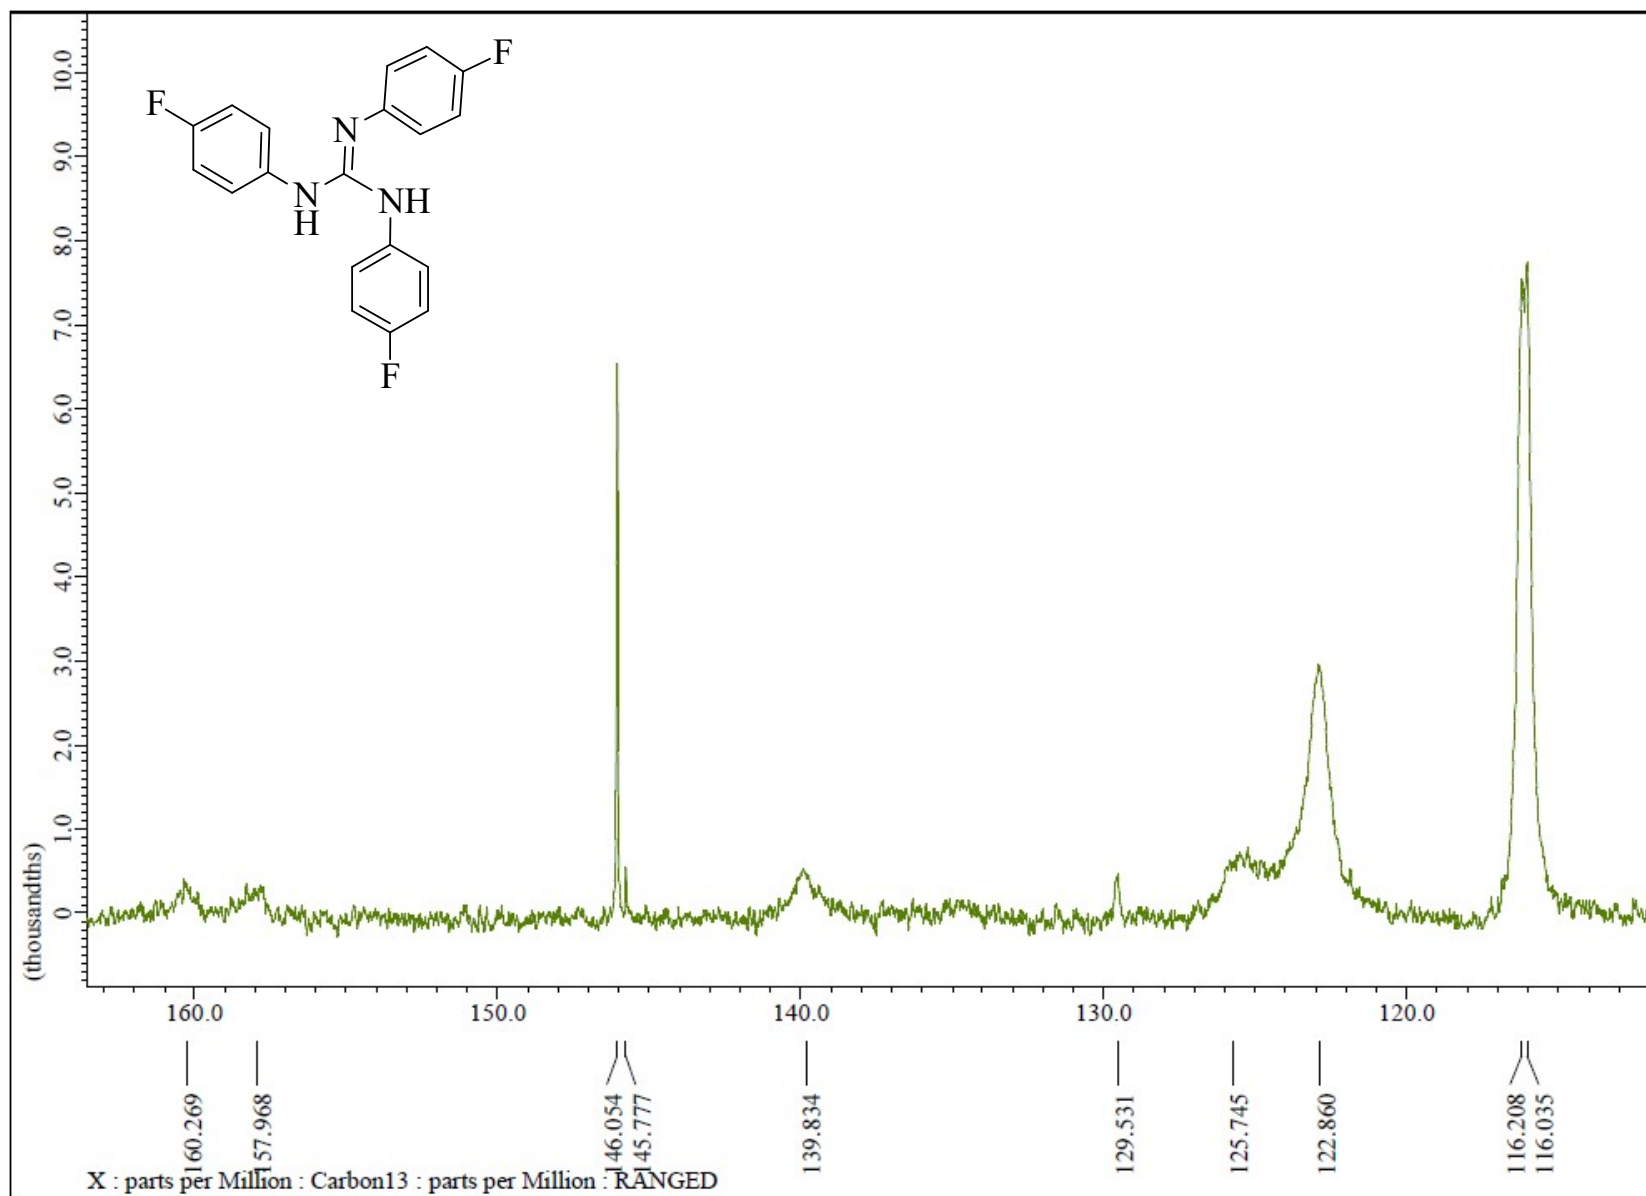

**Fig. S16**  $^{13}\text{C}\{^1\text{H}\}$  NMR ( $\text{CDCl}_3$ , 100.5 MHz) spectrum of  $[\text{ArN}=\text{C}(\text{N}(\text{H})\text{Ar})_2]$  ( $\text{Ar} = 4\text{-FC}_6\text{H}_4$ ) in the indicated region.

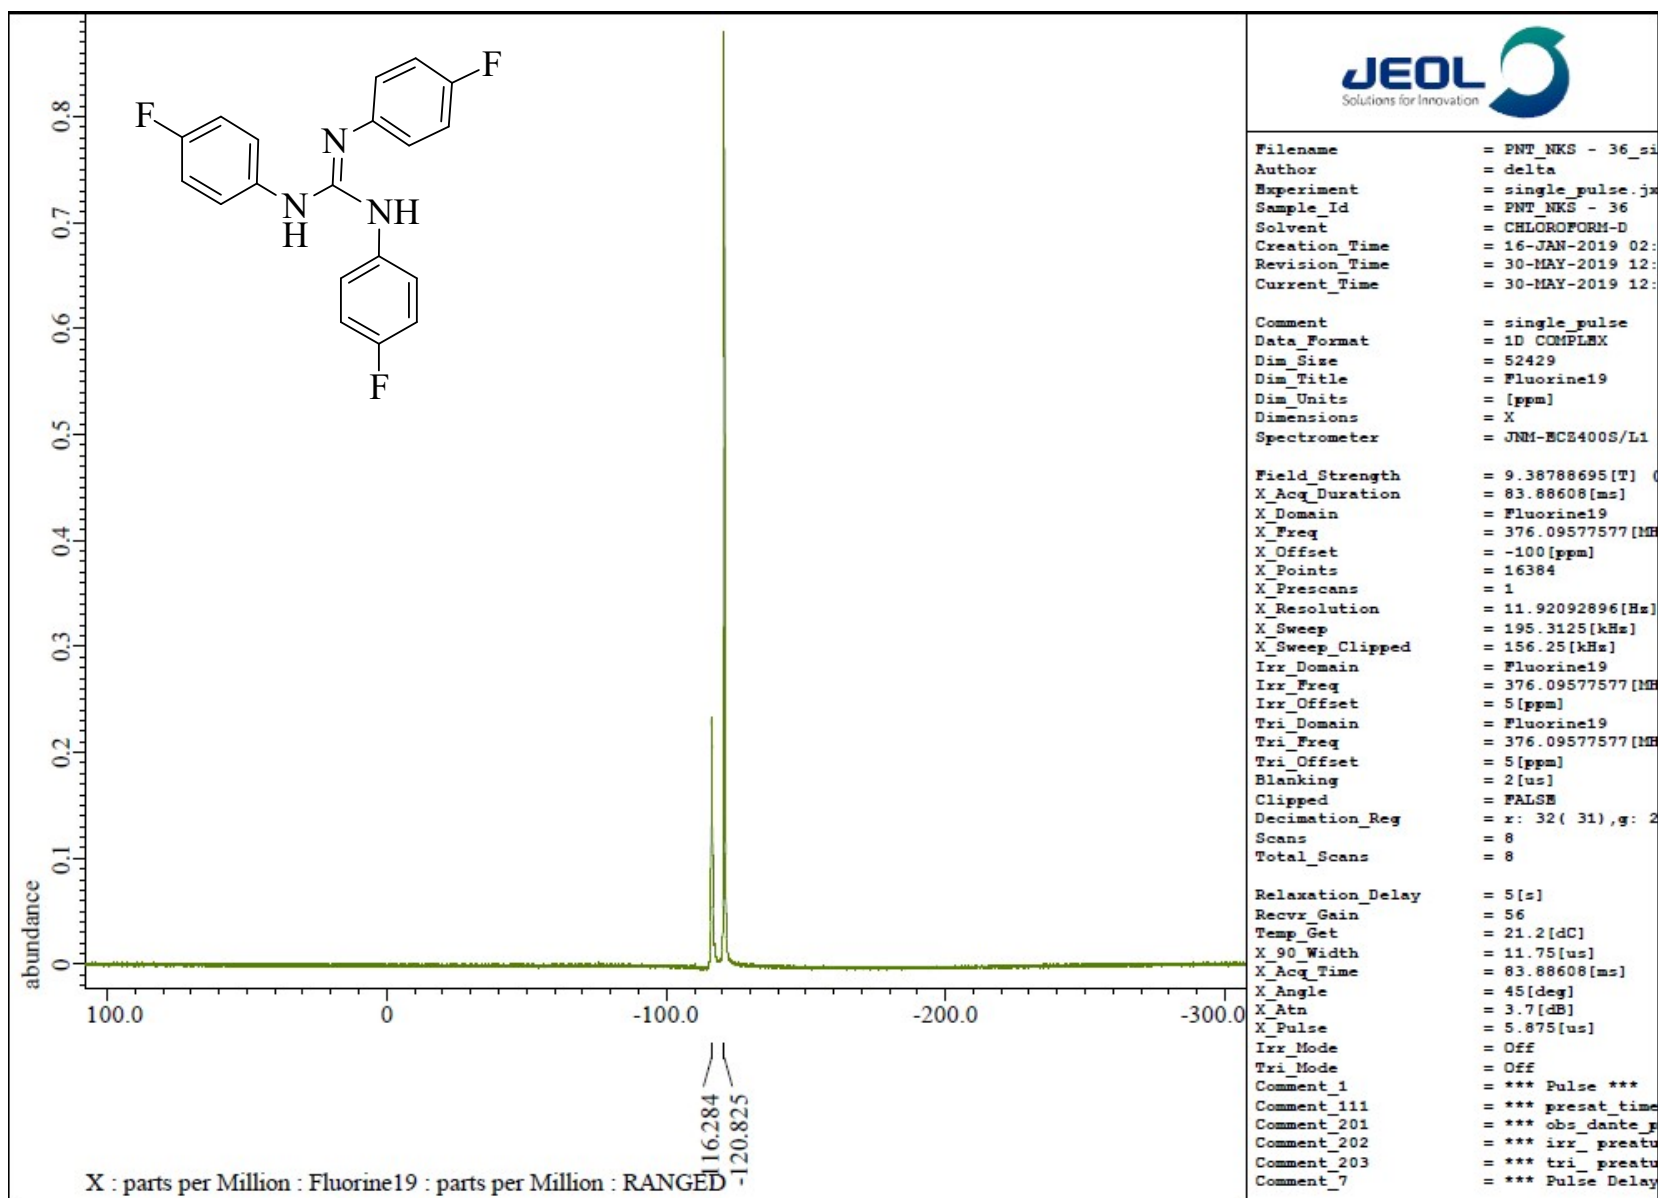

Fig. S17  $^{19}\text{F}\{^1\text{H}\}$  NMR ( $\text{CDCl}_3$ , 376.31 MHz) spectrum of  $[\text{ArN}=\text{C}(\text{N}(\text{H})\text{Ar})_2]$  ( $\text{Ar} = 4\text{-FC}_6\text{H}_4$ ).

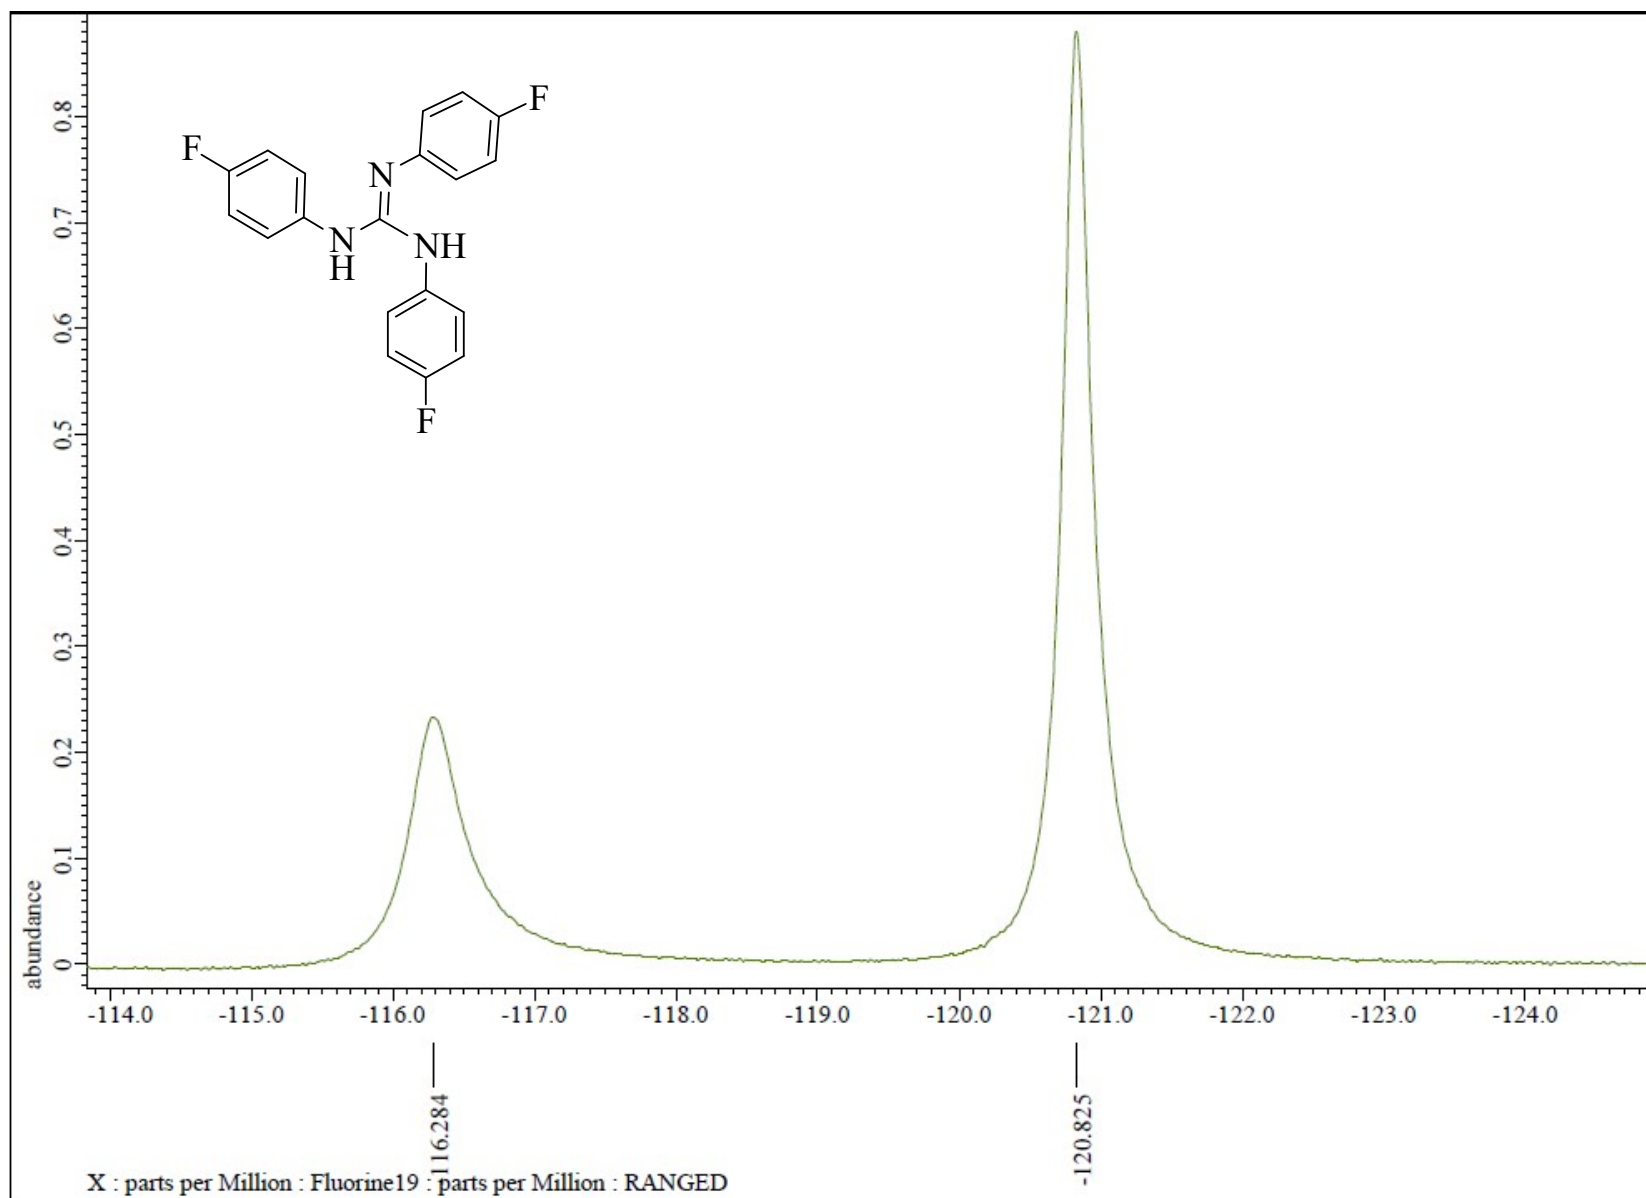

**Fig. S18**  $^{19}\text{F}$   $\{^1\text{H}\}$  NMR ( $\text{CDCl}_3$ , 376.31 MHz) spectrum of  $[\text{ArN}=\text{C}(\text{N}(\text{H})\text{Ar})_2]$  ( $\text{Ar} = 4\text{-FC}_6\text{H}_4$ ).

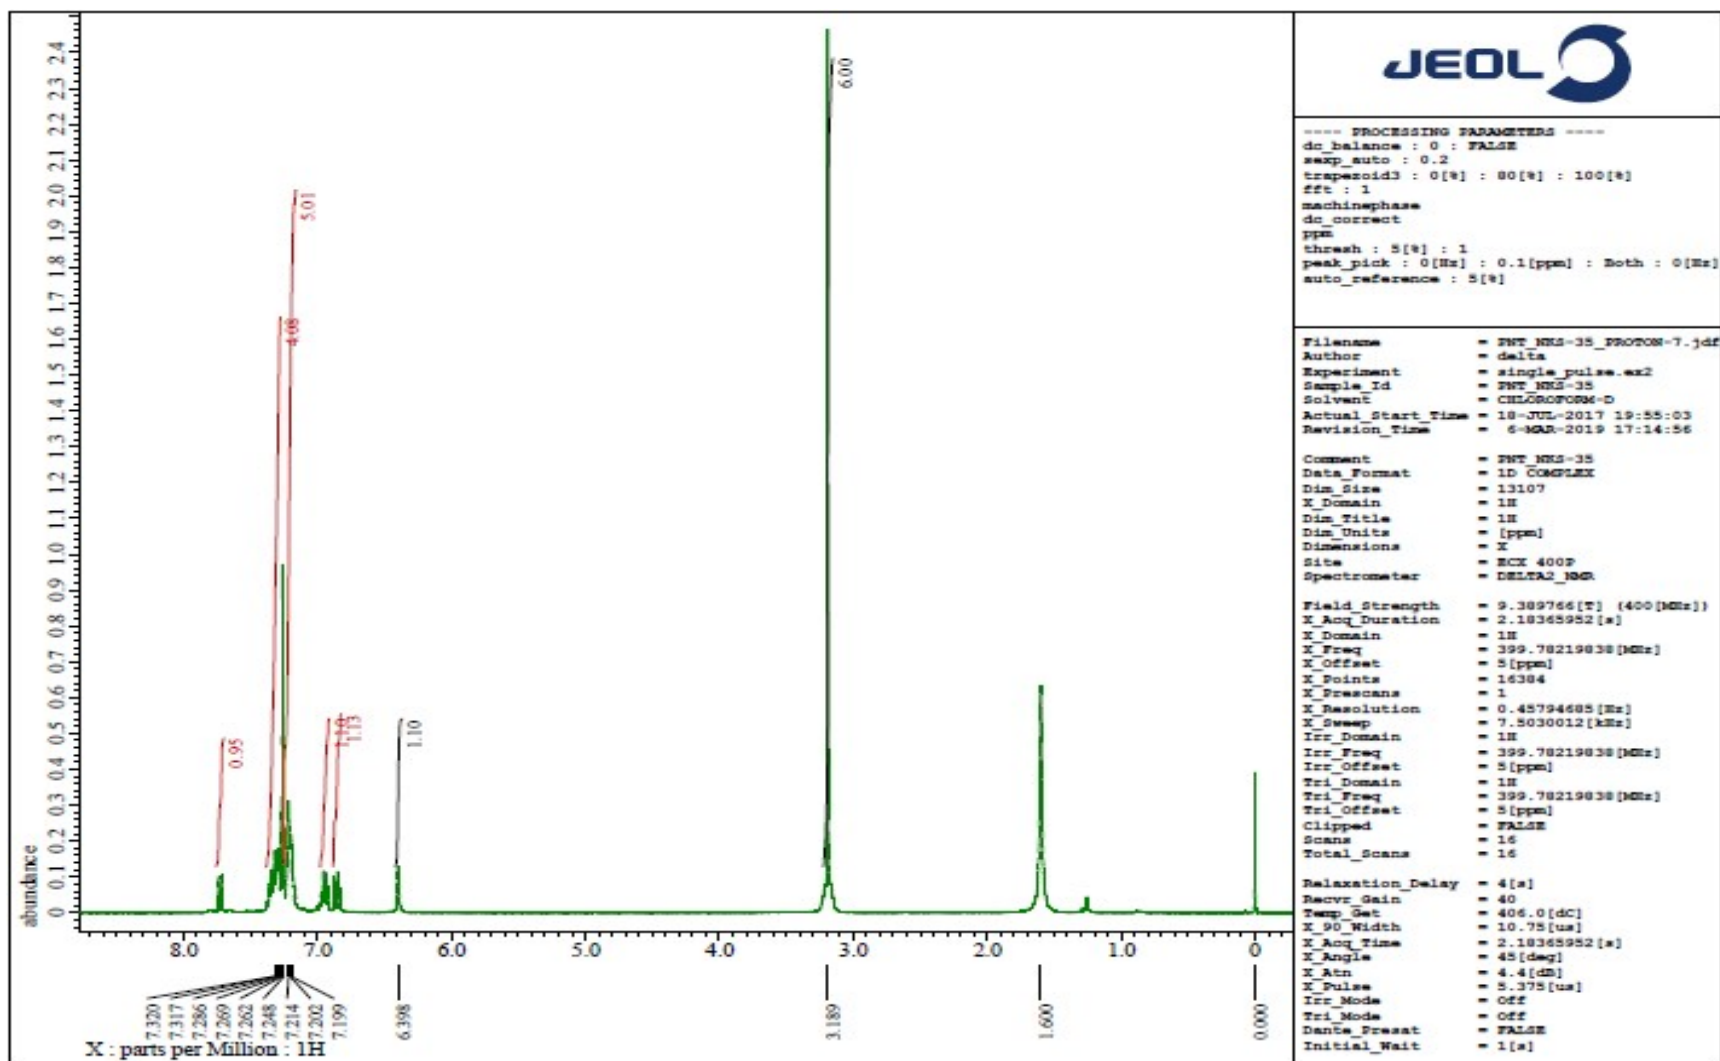

Fig. S19  $^1\text{H}$  NMR ( $\text{CDCl}_3$ , 400MHz) spectrum of complex 6.

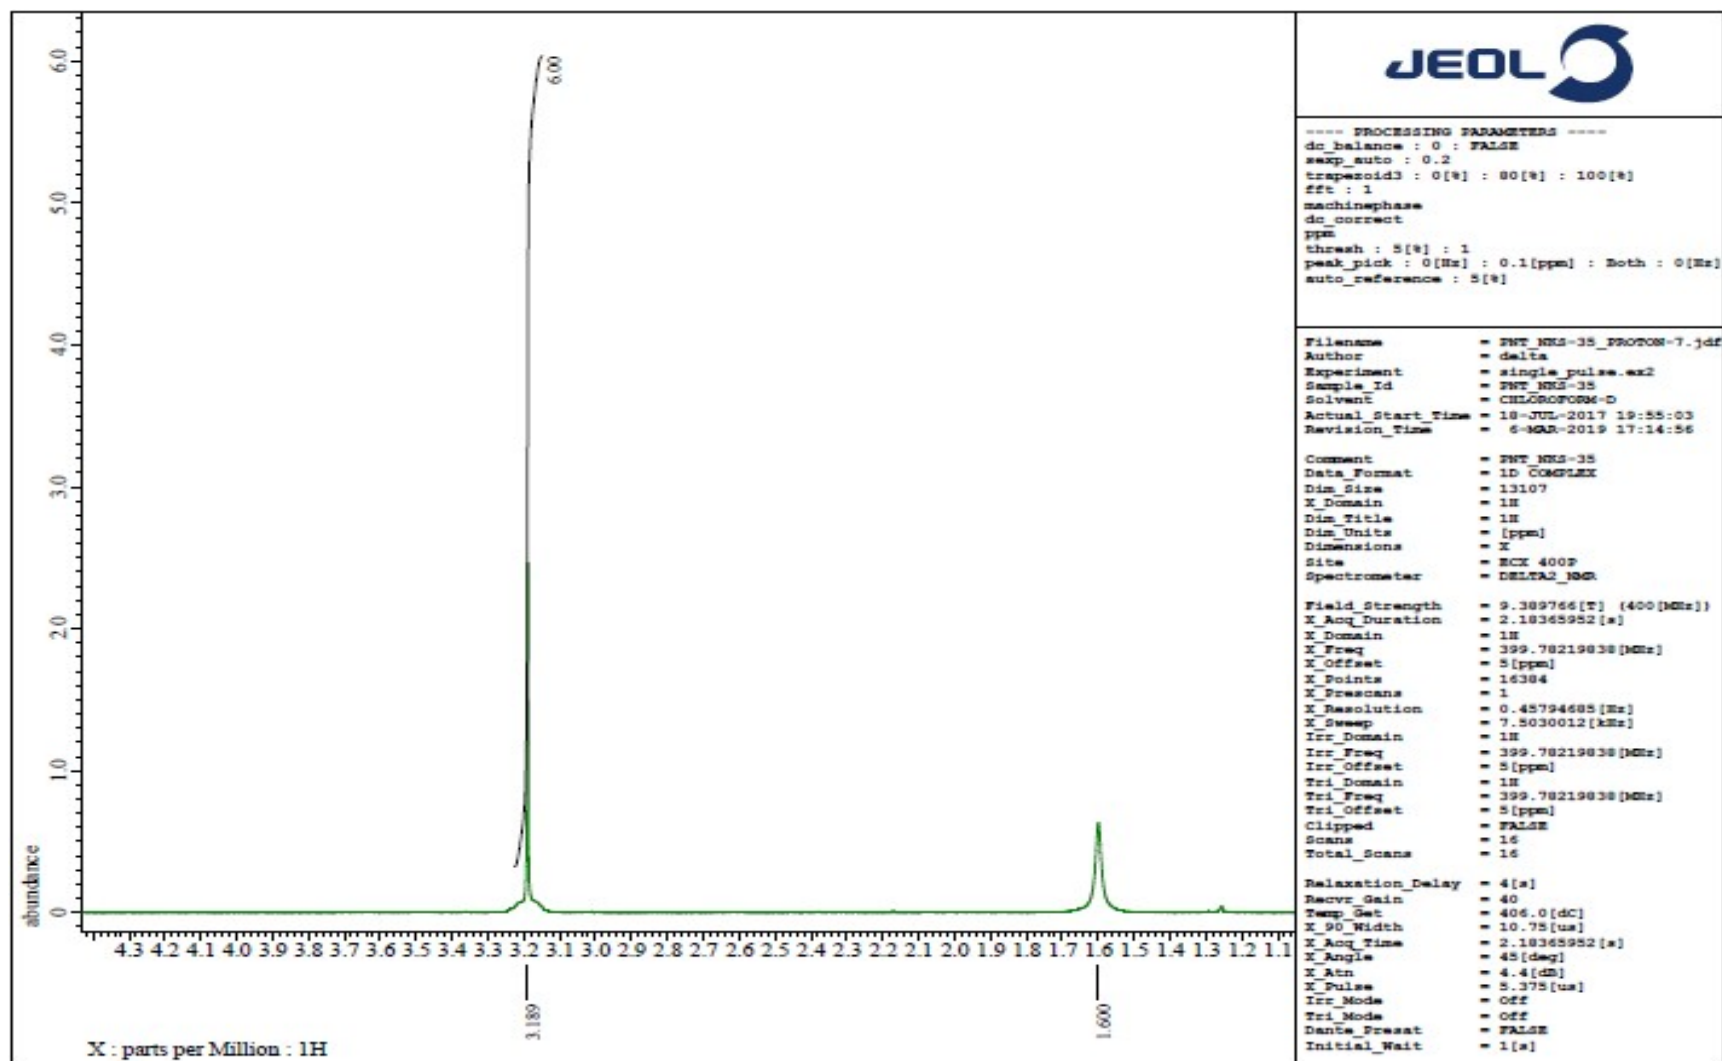

Fig. S20  $^1\text{H}$  NMR ( $\text{CDCl}_3$ , 400MHz) spectrum of complex 6 in the indicated region.

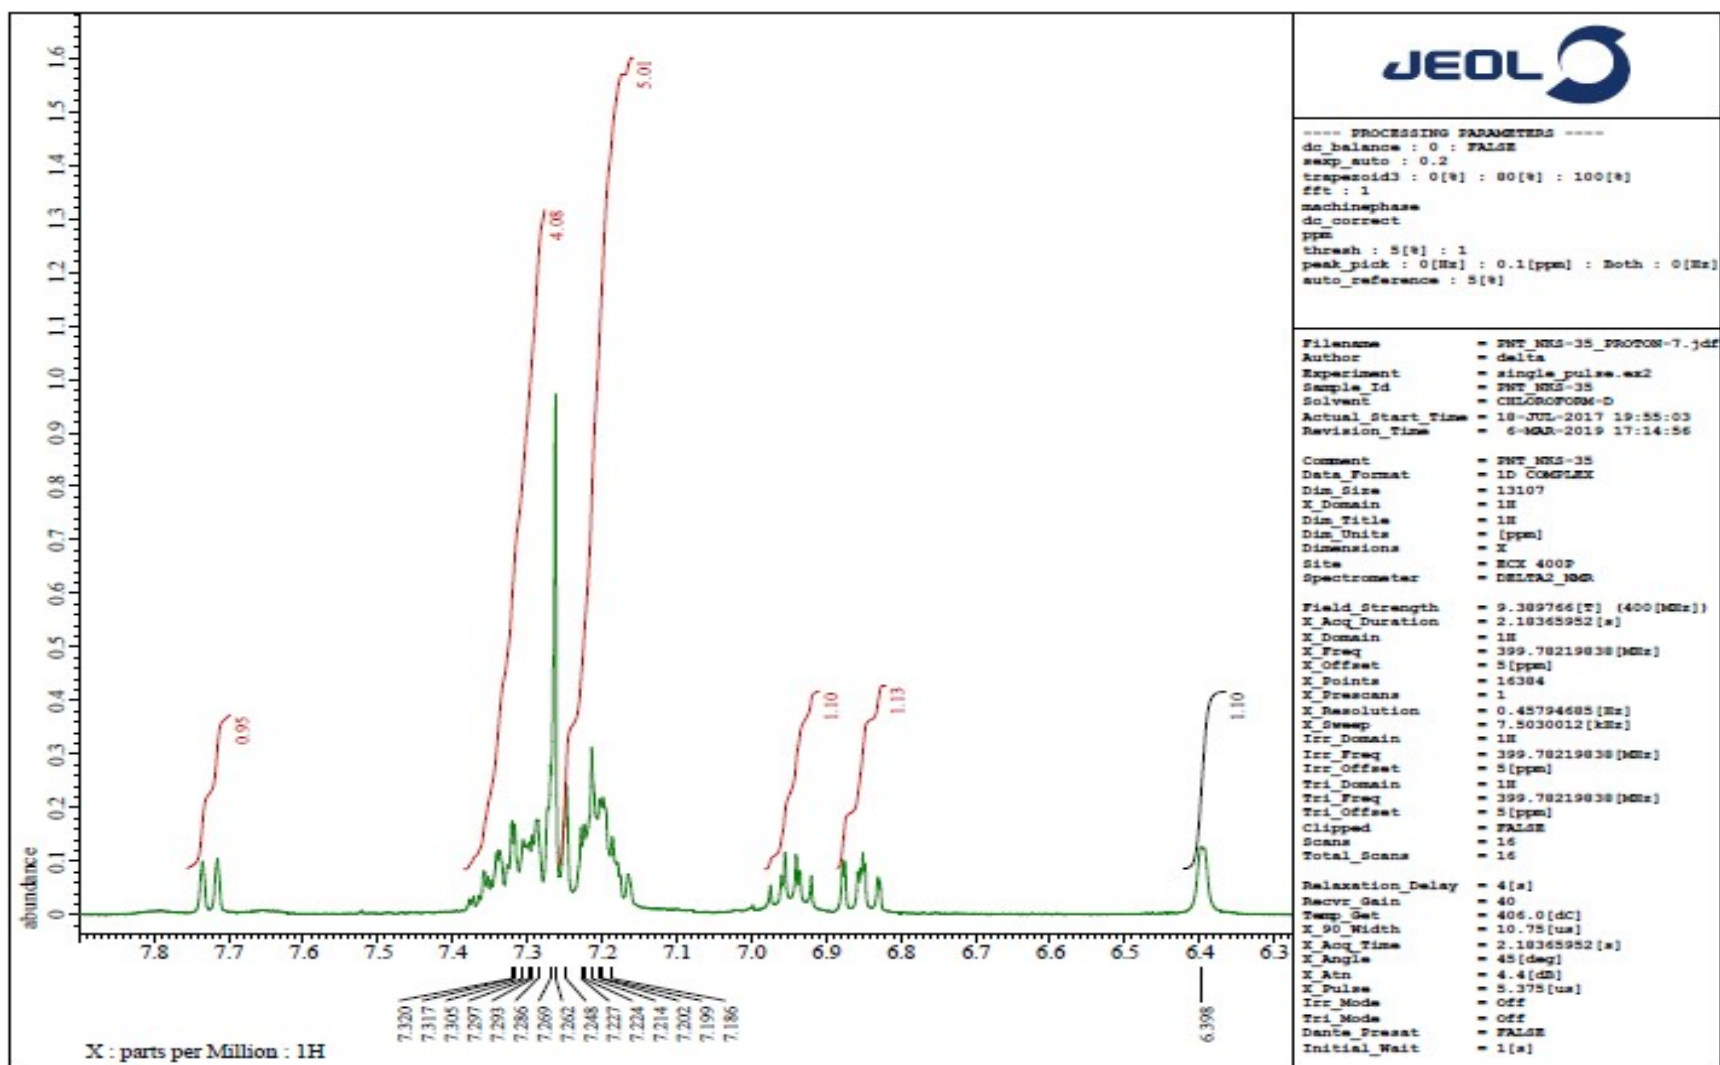

Fig. S21  $^1\text{H}$  NMR ( $\text{CDCl}_3$ , 400MHz) spectrum of complex 6 in the indicated region.

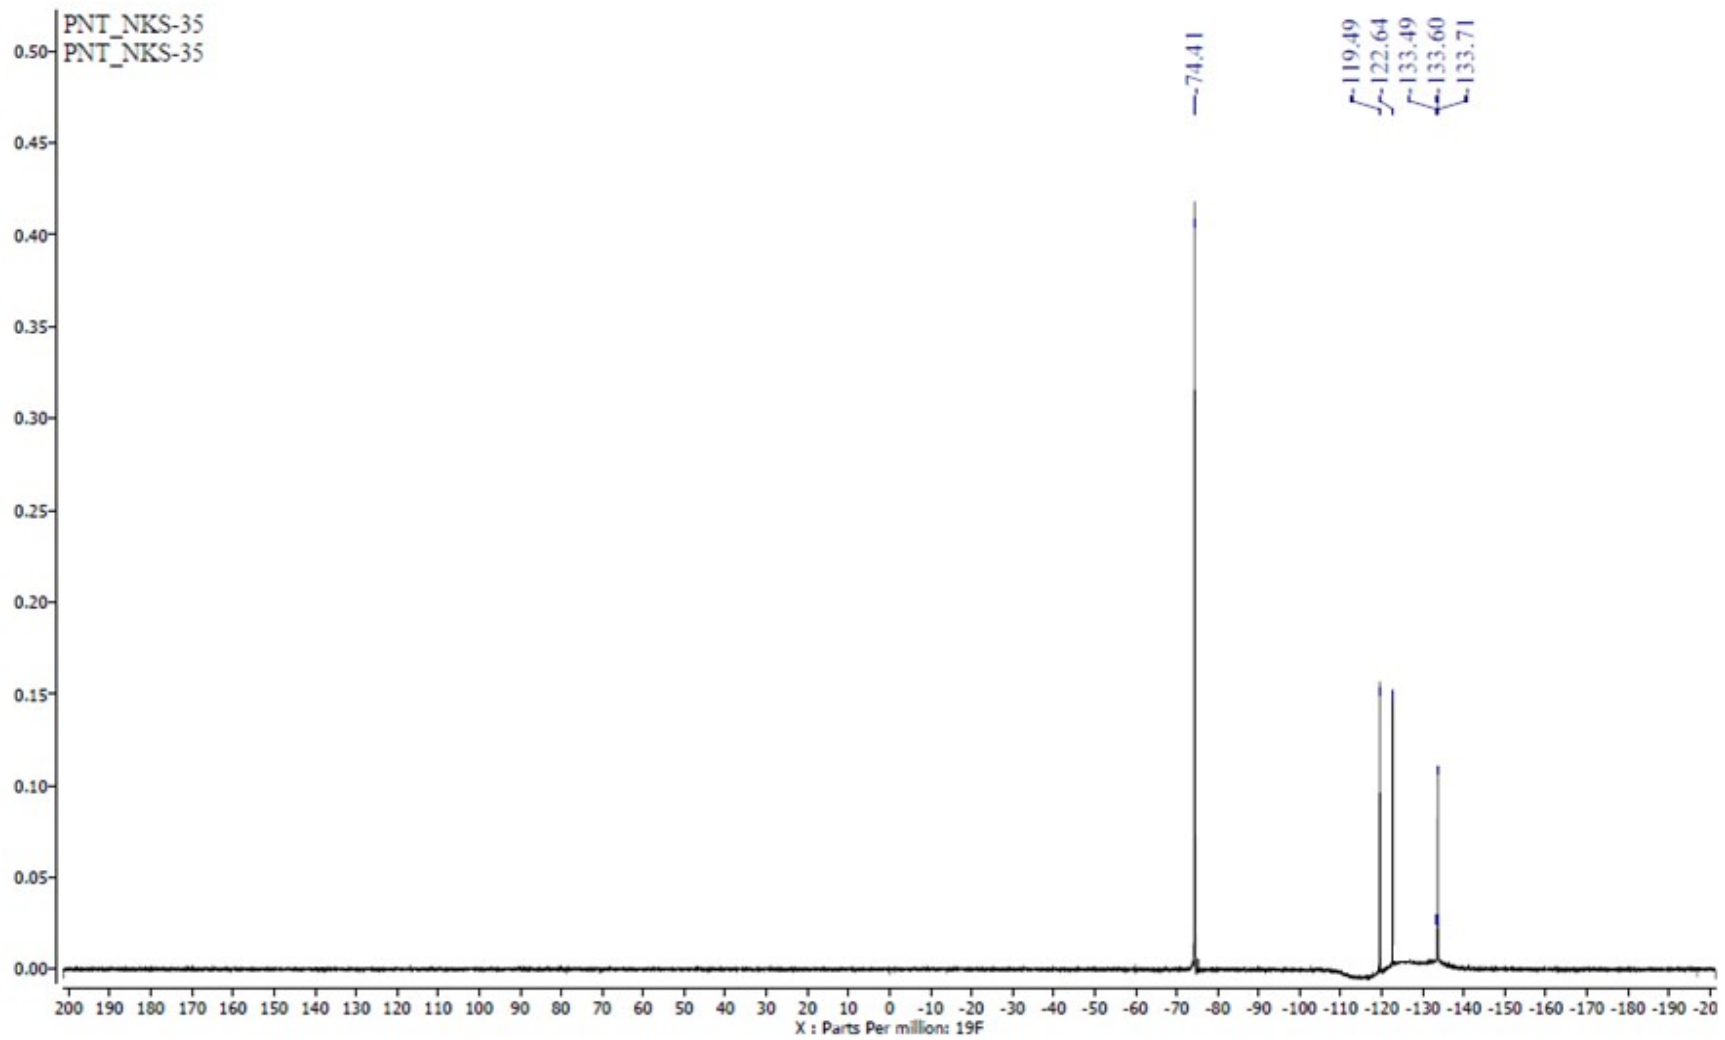

Fig. S22  $^{19}\text{F}\{^1\text{H}\}$  NMR ( $\text{CDCl}_3$ , 376.31MHz) spectrum of complex **6**.



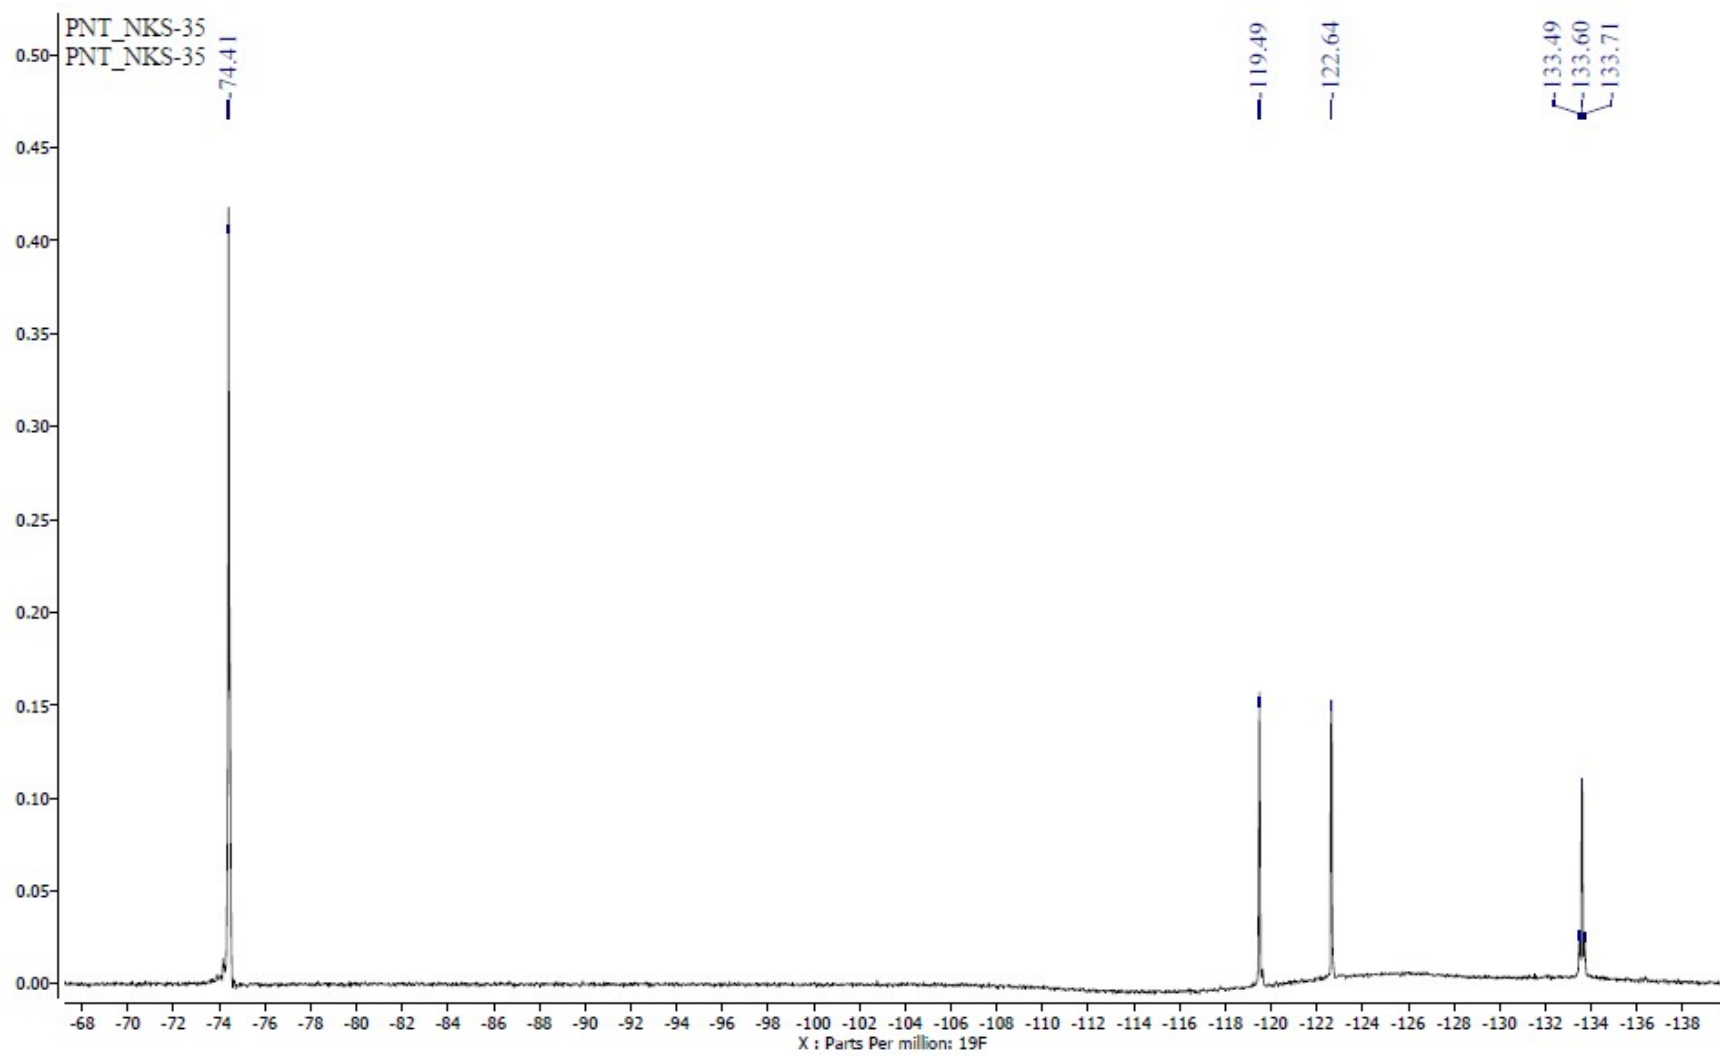

**Fig. S23**  $^{19}\text{F}\{^1\text{H}\}$  NMR ( $\text{CDCl}_3$ , 376.31MHz) spectrum of complex **6** in the indicated region.

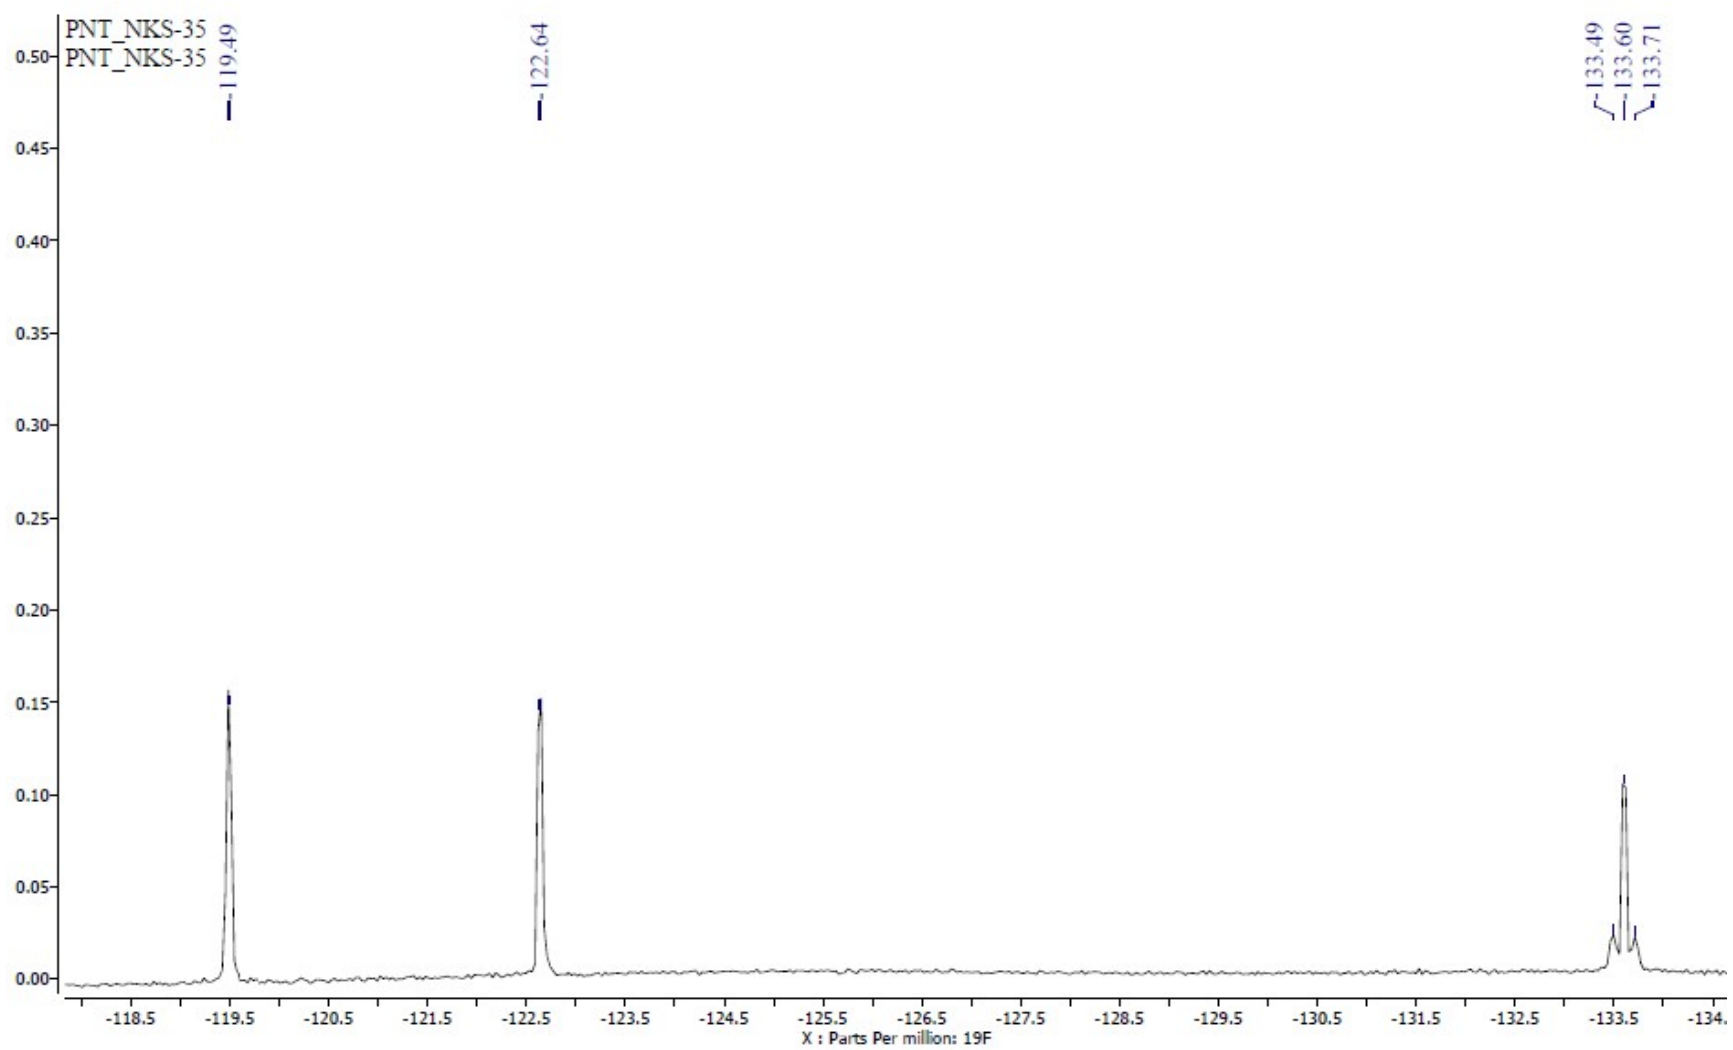

**Fig. S24**  $^{19}\text{F}$   $\{^1\text{H}\}$  NMR ( $\text{CDCl}_3$ , 376.31MHz) spectrum of complex **6** in the indicated region.

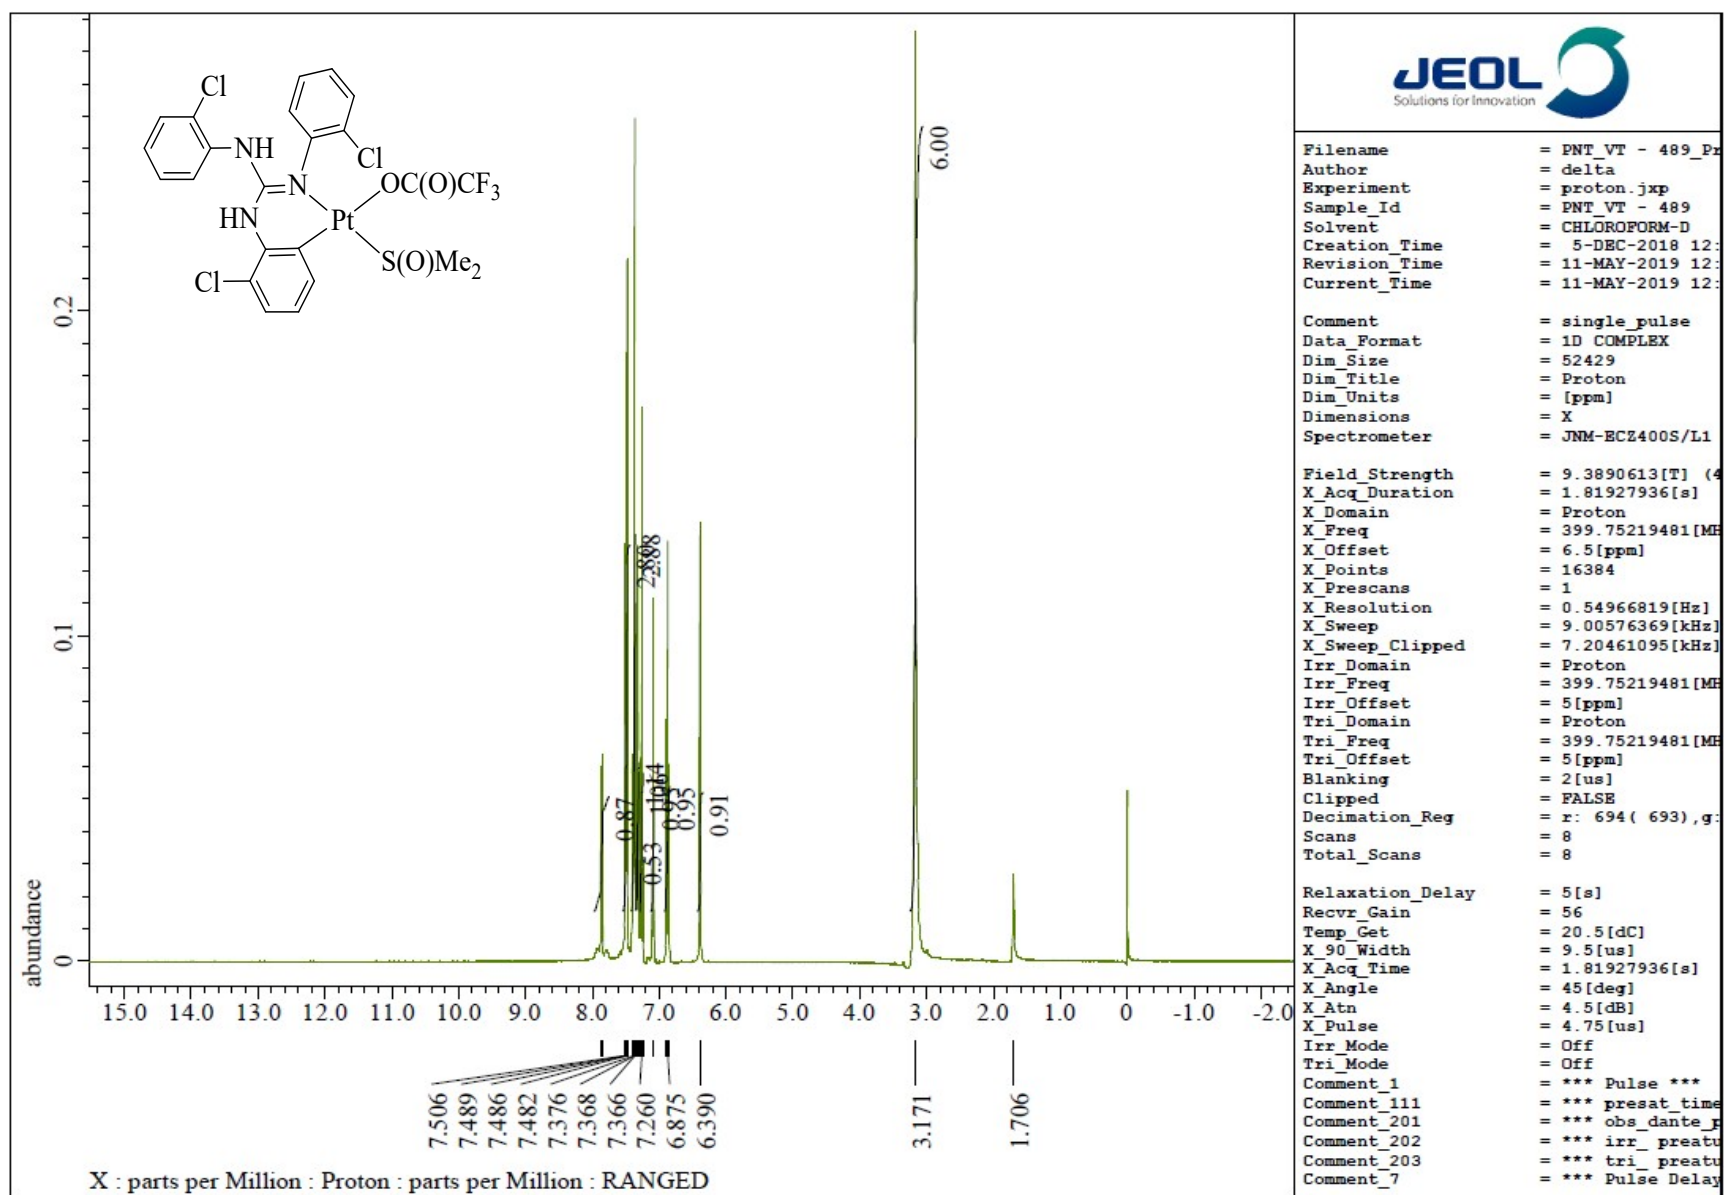

Fig. S25 <sup>1</sup>H NMR (CDCl<sub>3</sub>, 400 MHz) spectrum of 7.

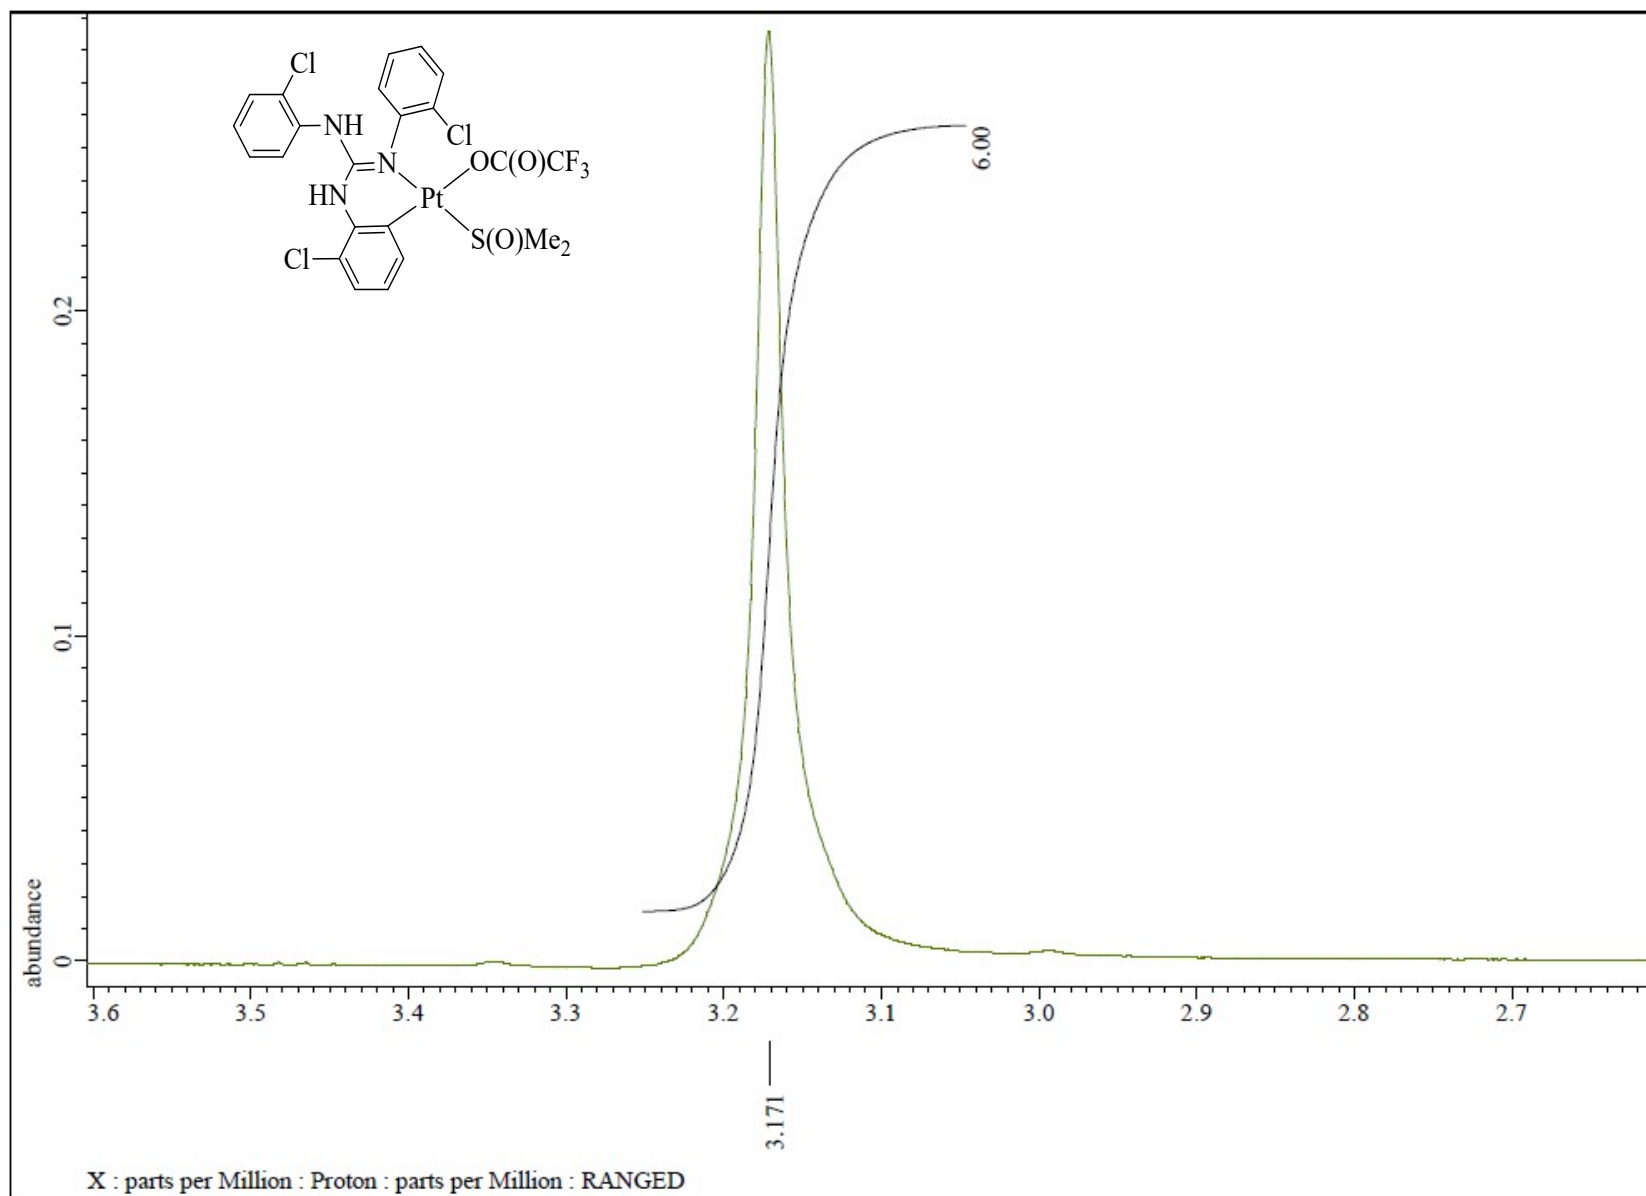

Fig. S26  $^1\text{H}$  NMR ( $\text{CDCl}_3$ , 400 MHz) spectrum of **7** in the indicated region.

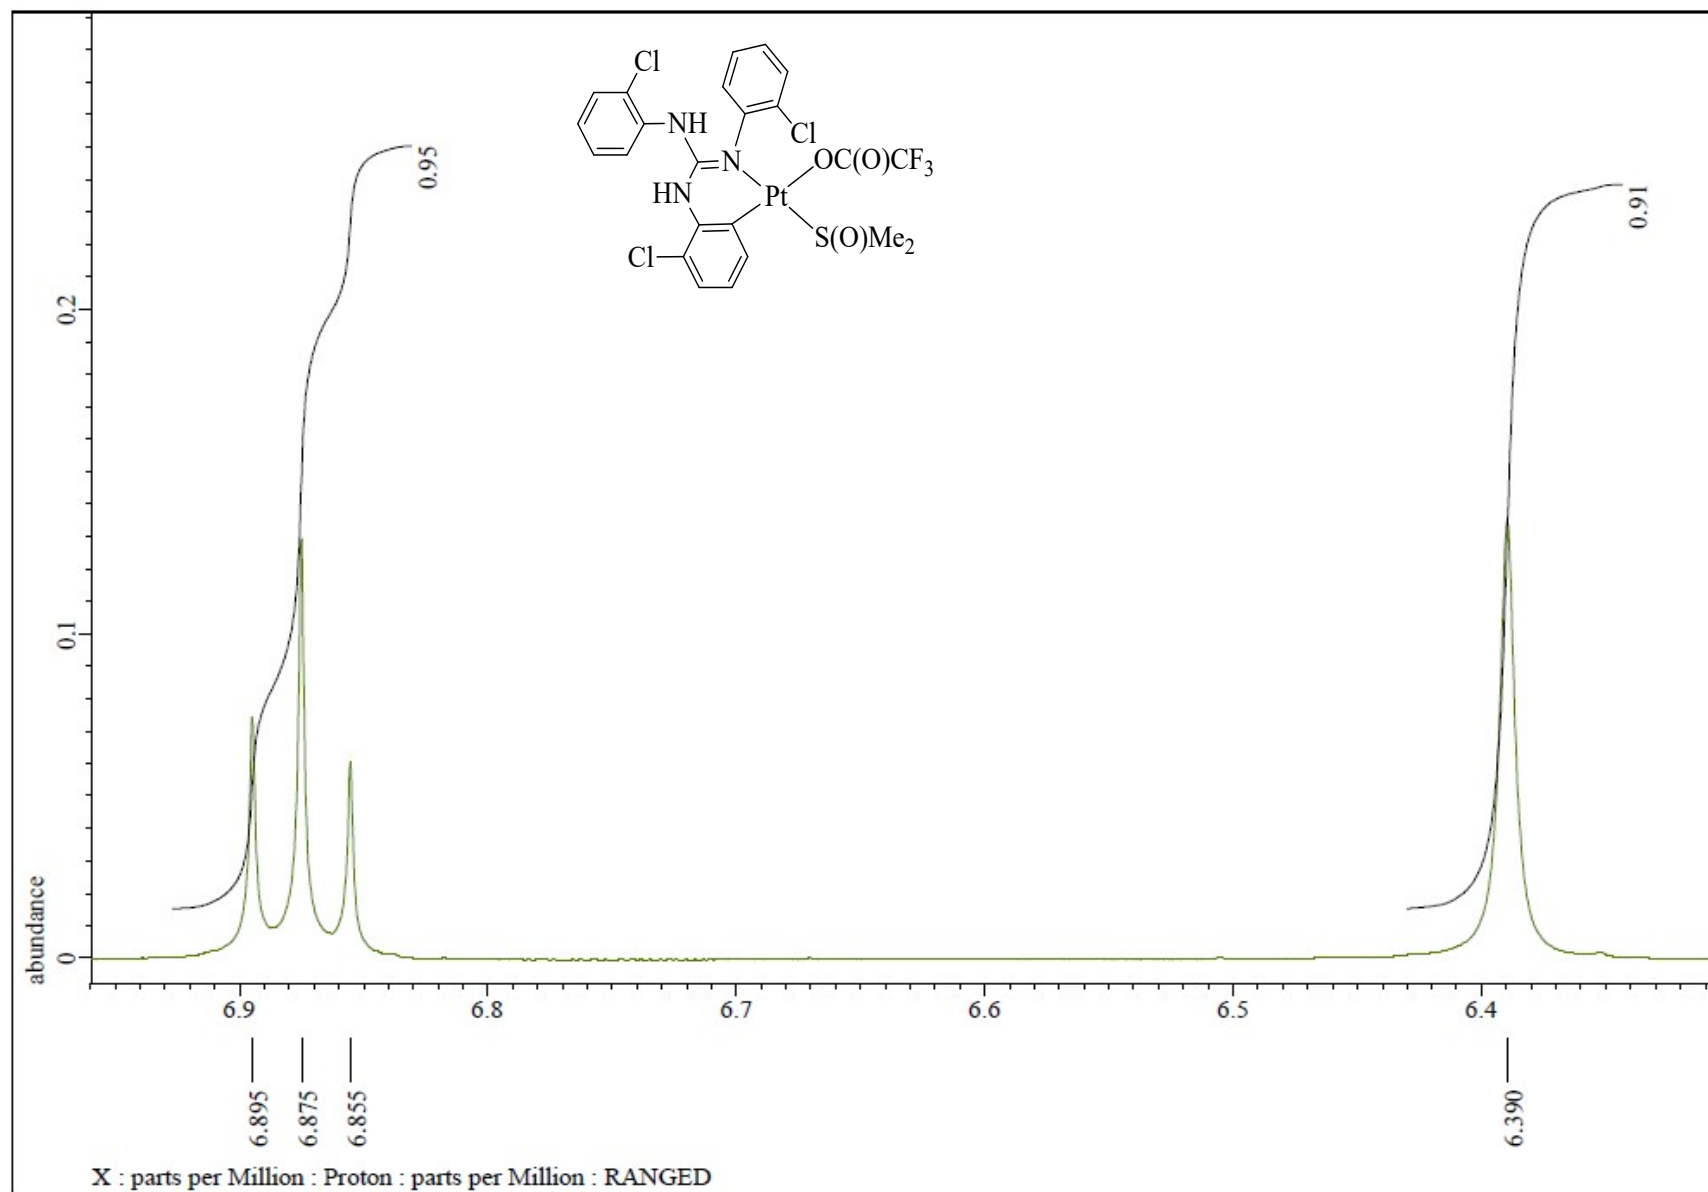

Fig. S27  $^1\text{H}$  NMR ( $\text{CDCl}_3$ , 400 MHz) spectrum of **7** in the indicated region.

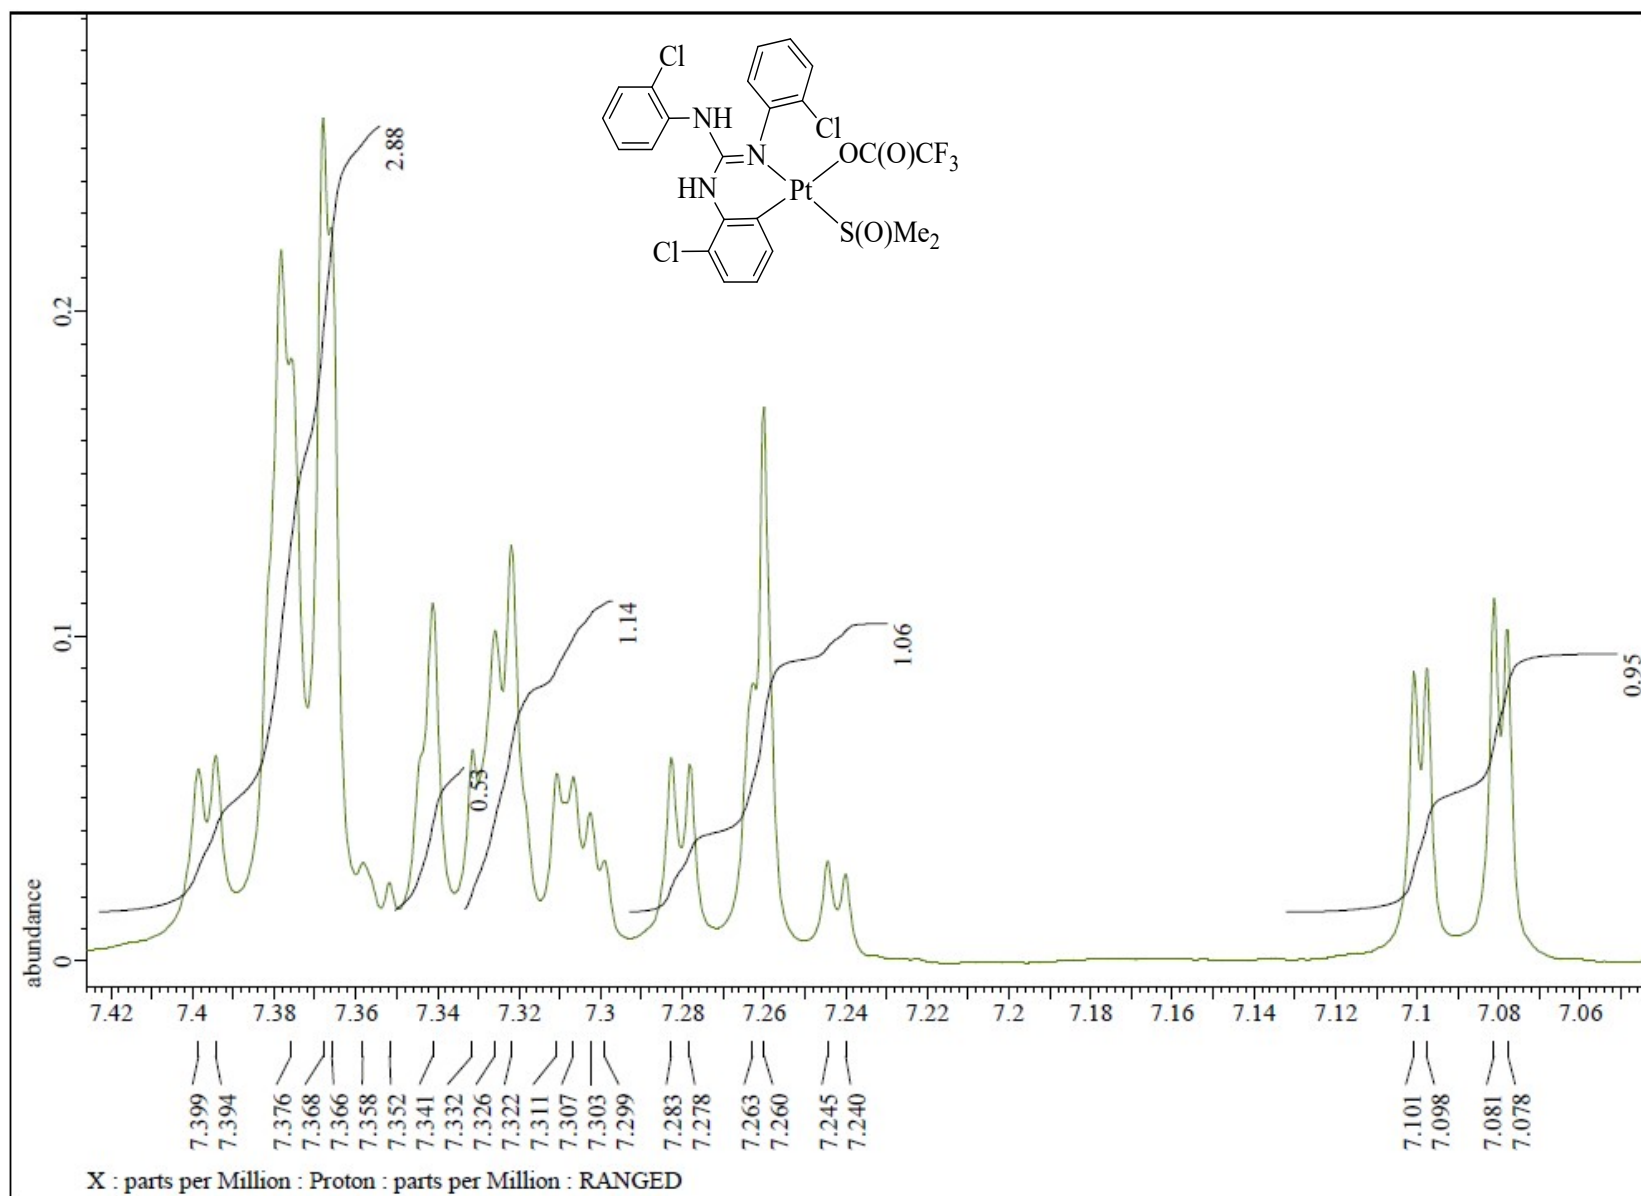

Fig. S28 <sup>1</sup>H NMR (CDCl<sub>3</sub>, 400 MHz) spectrum of 7 in the indicated region.

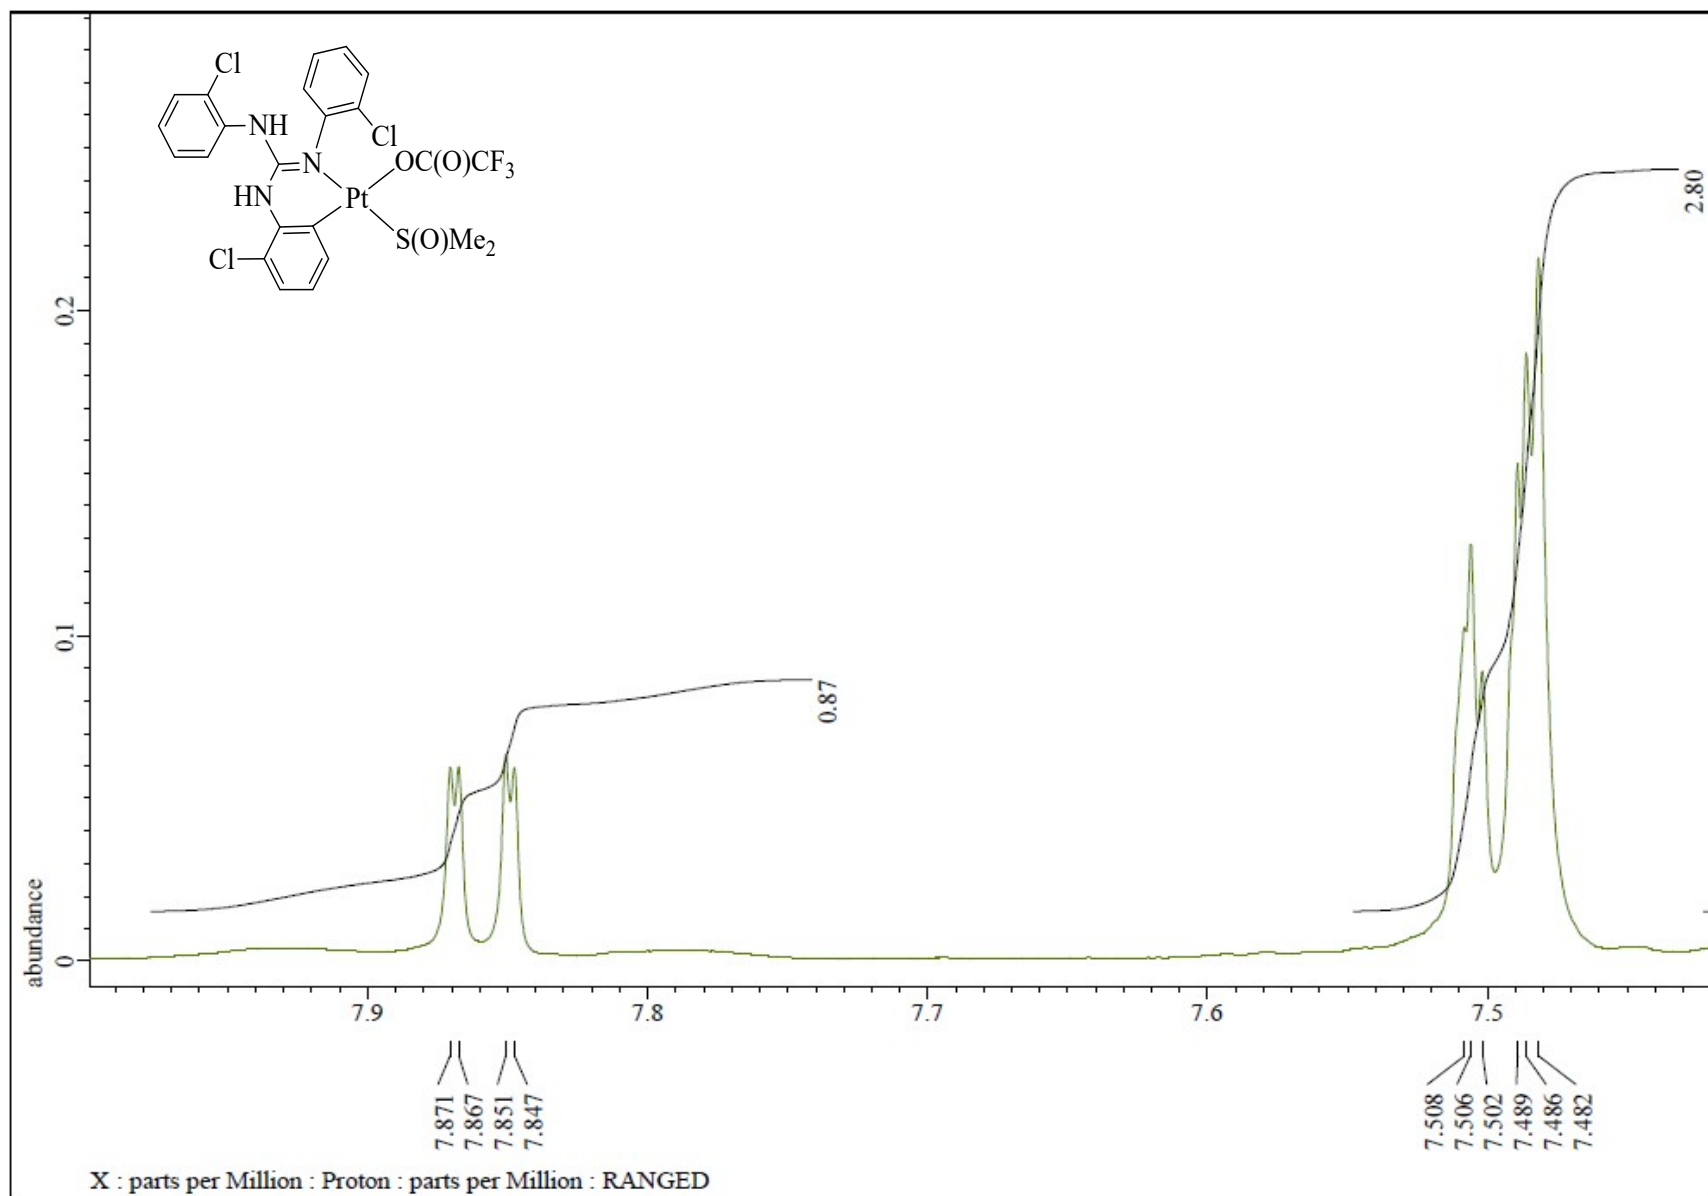

Fig. S29 <sup>1</sup>H NMR (CDCl<sub>3</sub>, 400 MHz) spectrum of 7 in the indicated region.

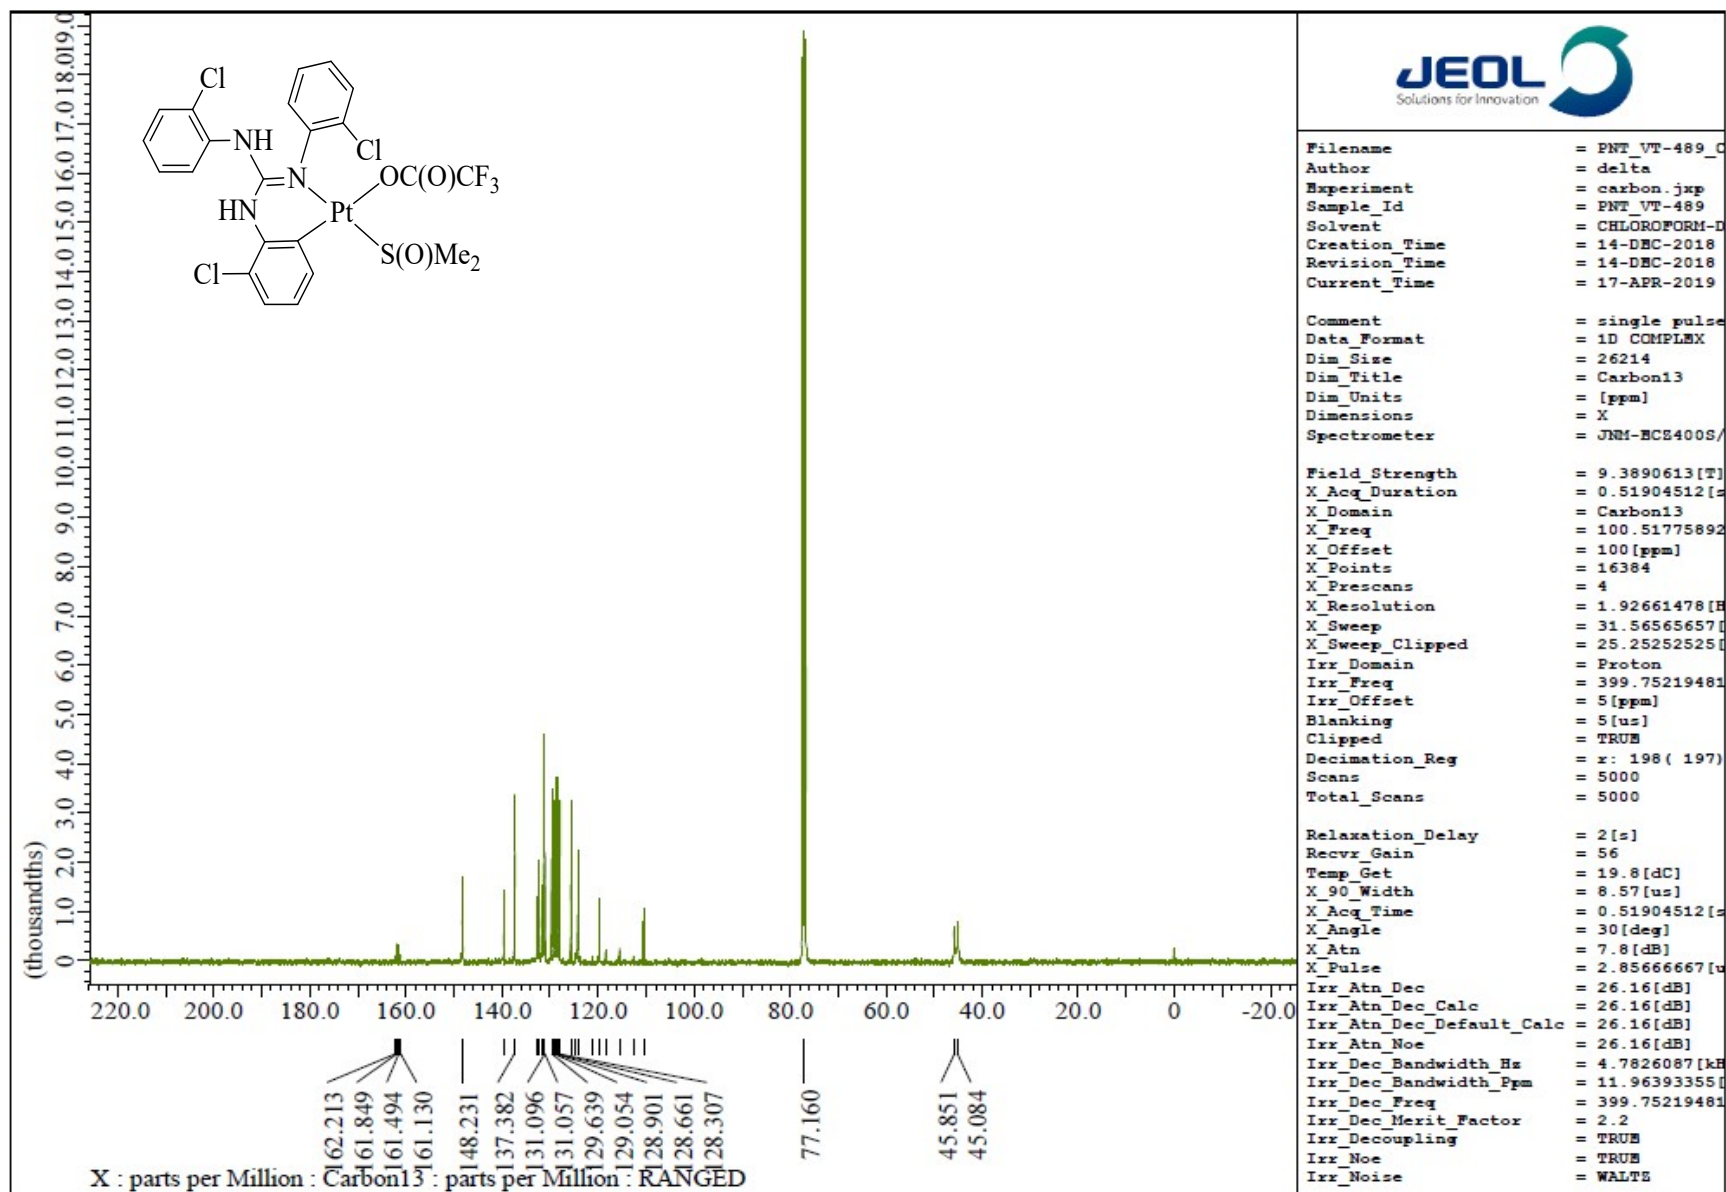

Fig. S30  $^{13}\text{C}\{^1\text{H}\}$  NMR ( $\text{CDCl}_3$ , 100.5 MHz) spectrum of 7.



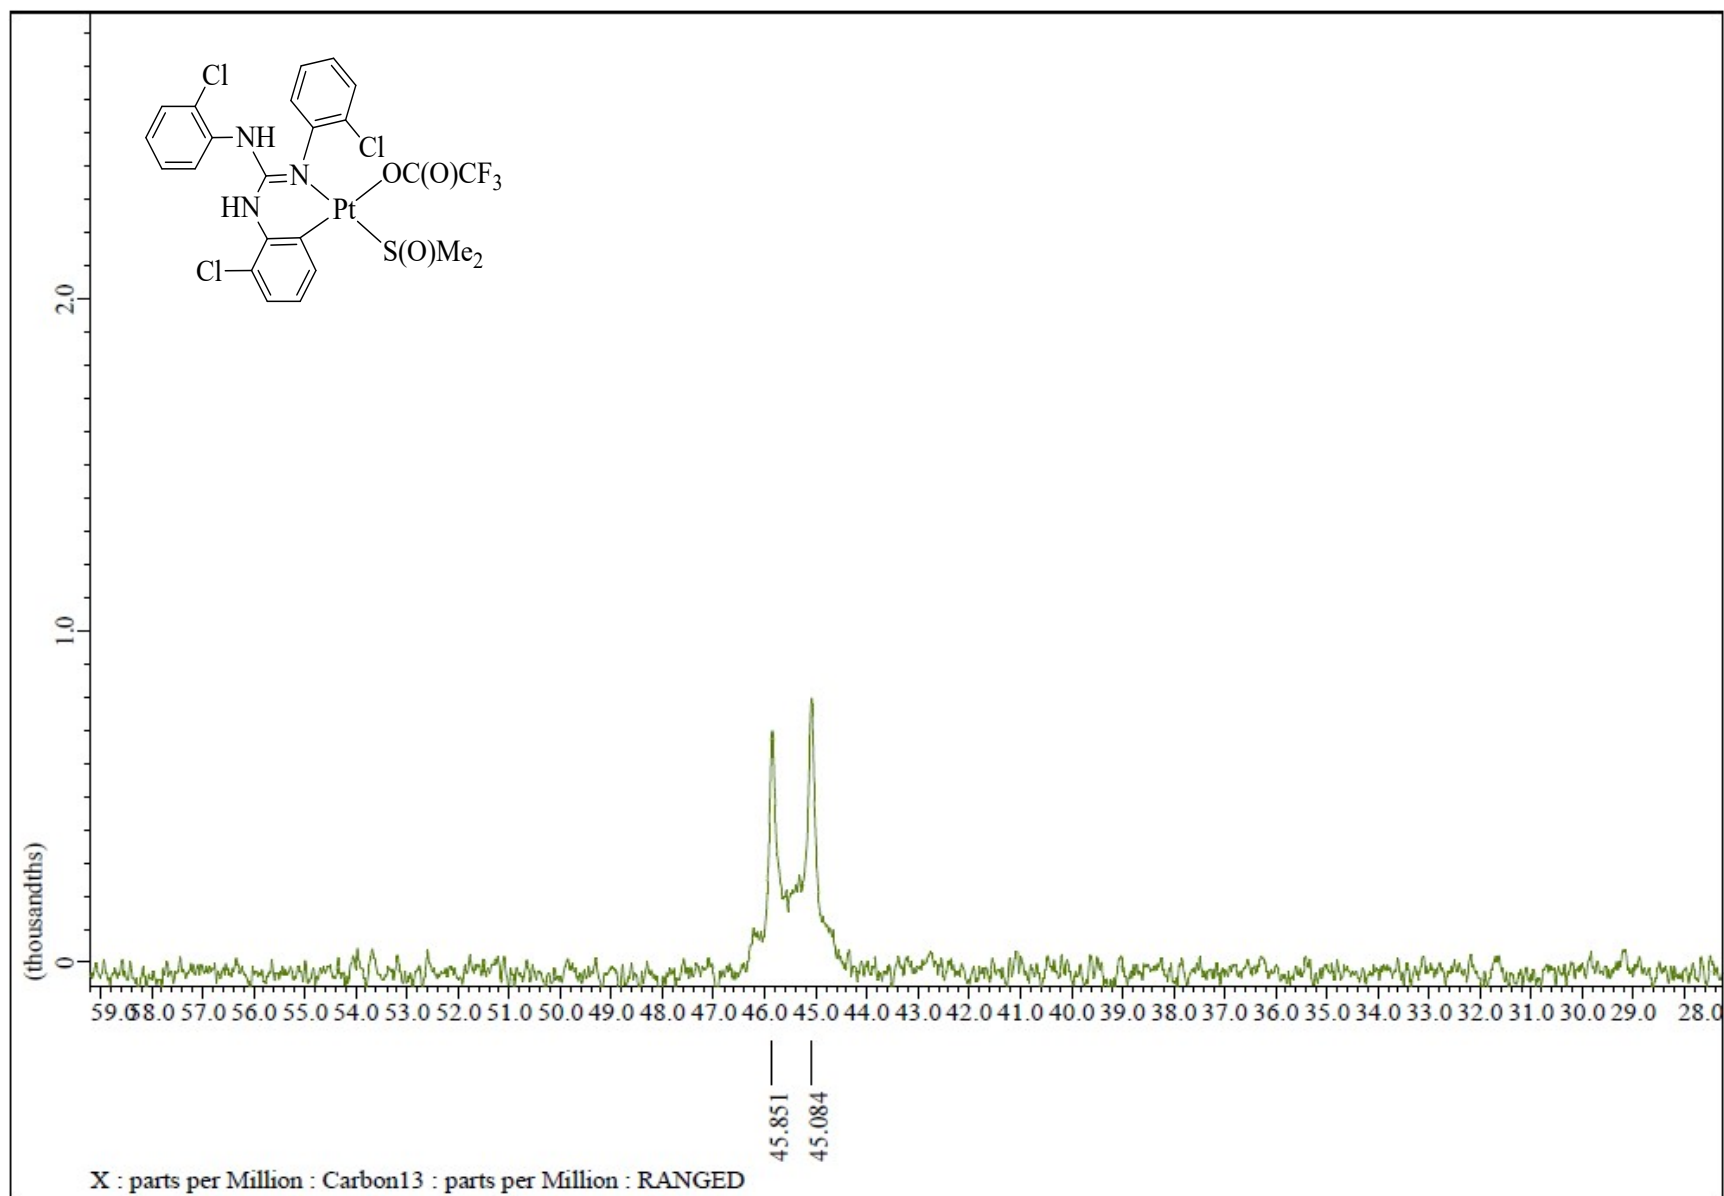

Fig. S31  $^{13}\text{C}\{^1\text{H}\}$  NMR ( $\text{CDCl}_3$ , 100.5 MHz) spectrum of **7** in the indicated region.

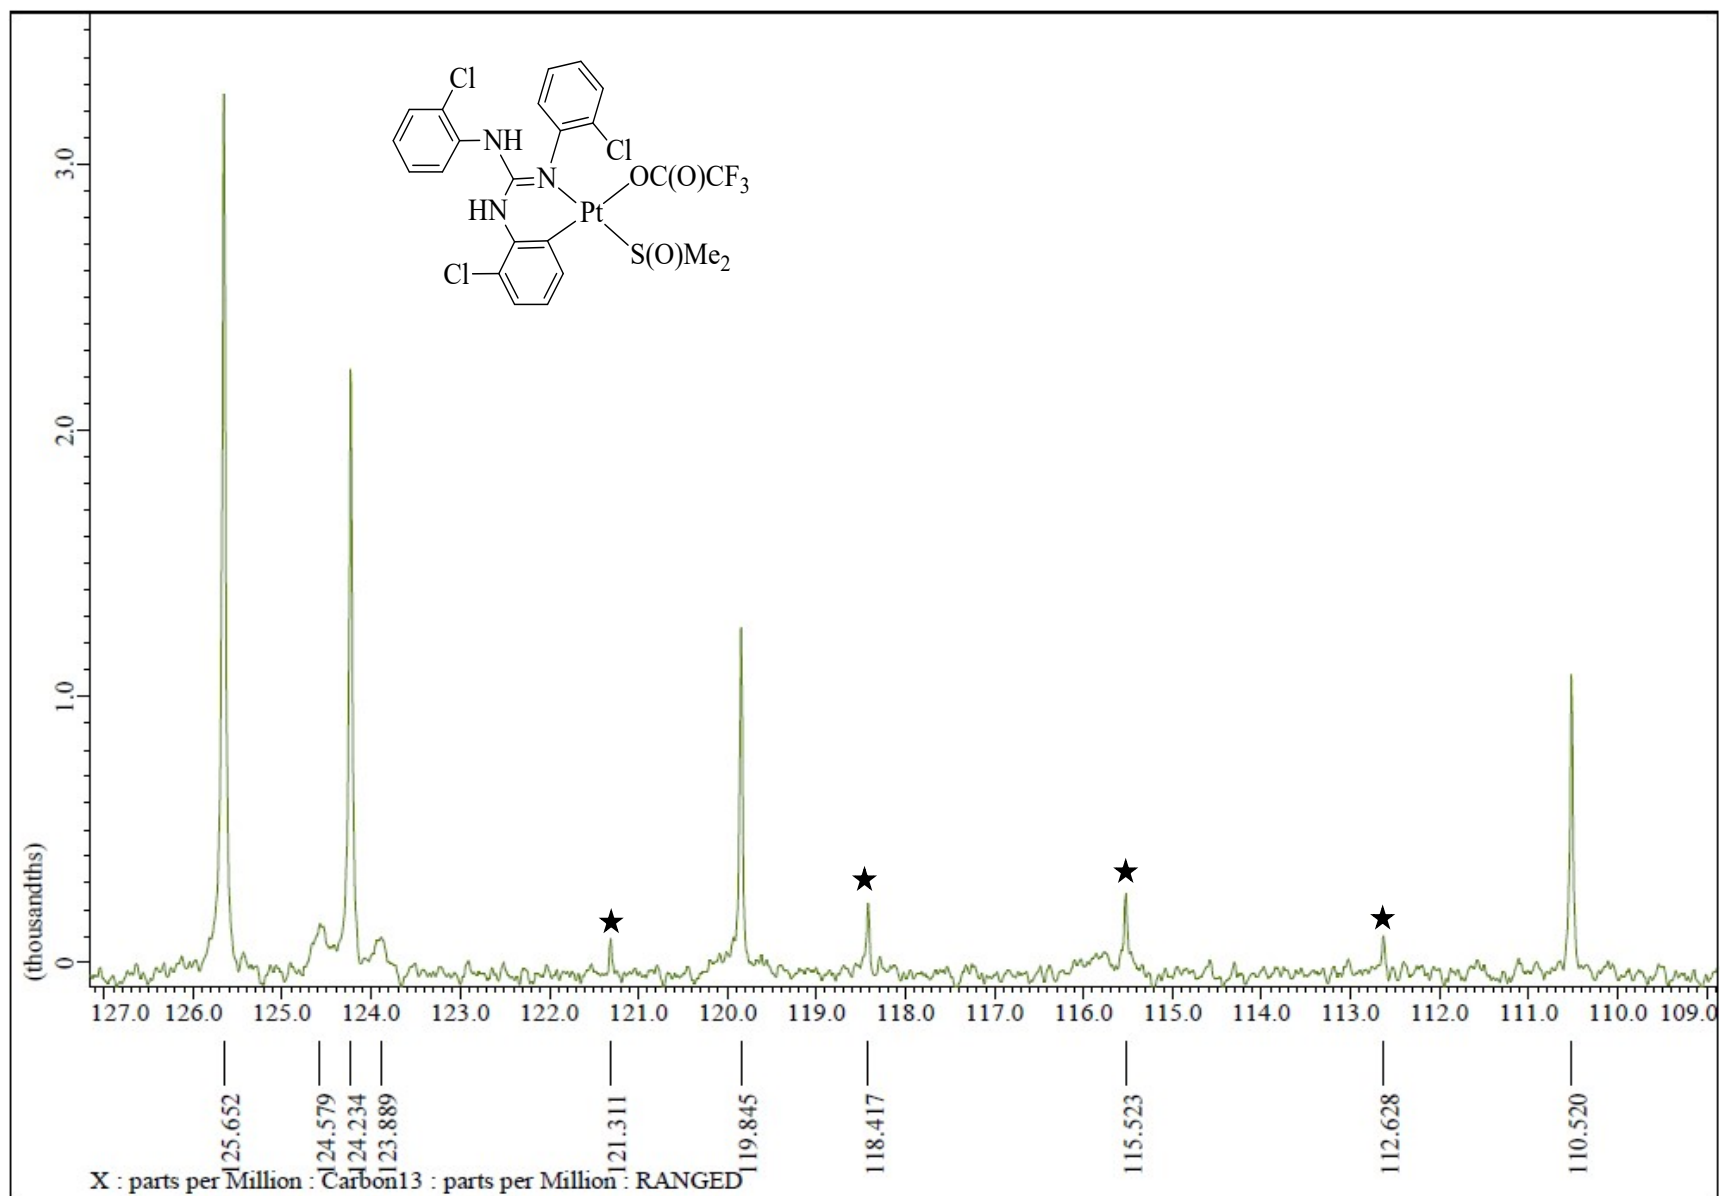

Fig. S32  $^{13}\text{C}\{^1\text{H}\}$  NMR ( $\text{CDCl}_3$ , 100.5 MHz) spectrum of **7** in the indicated region.

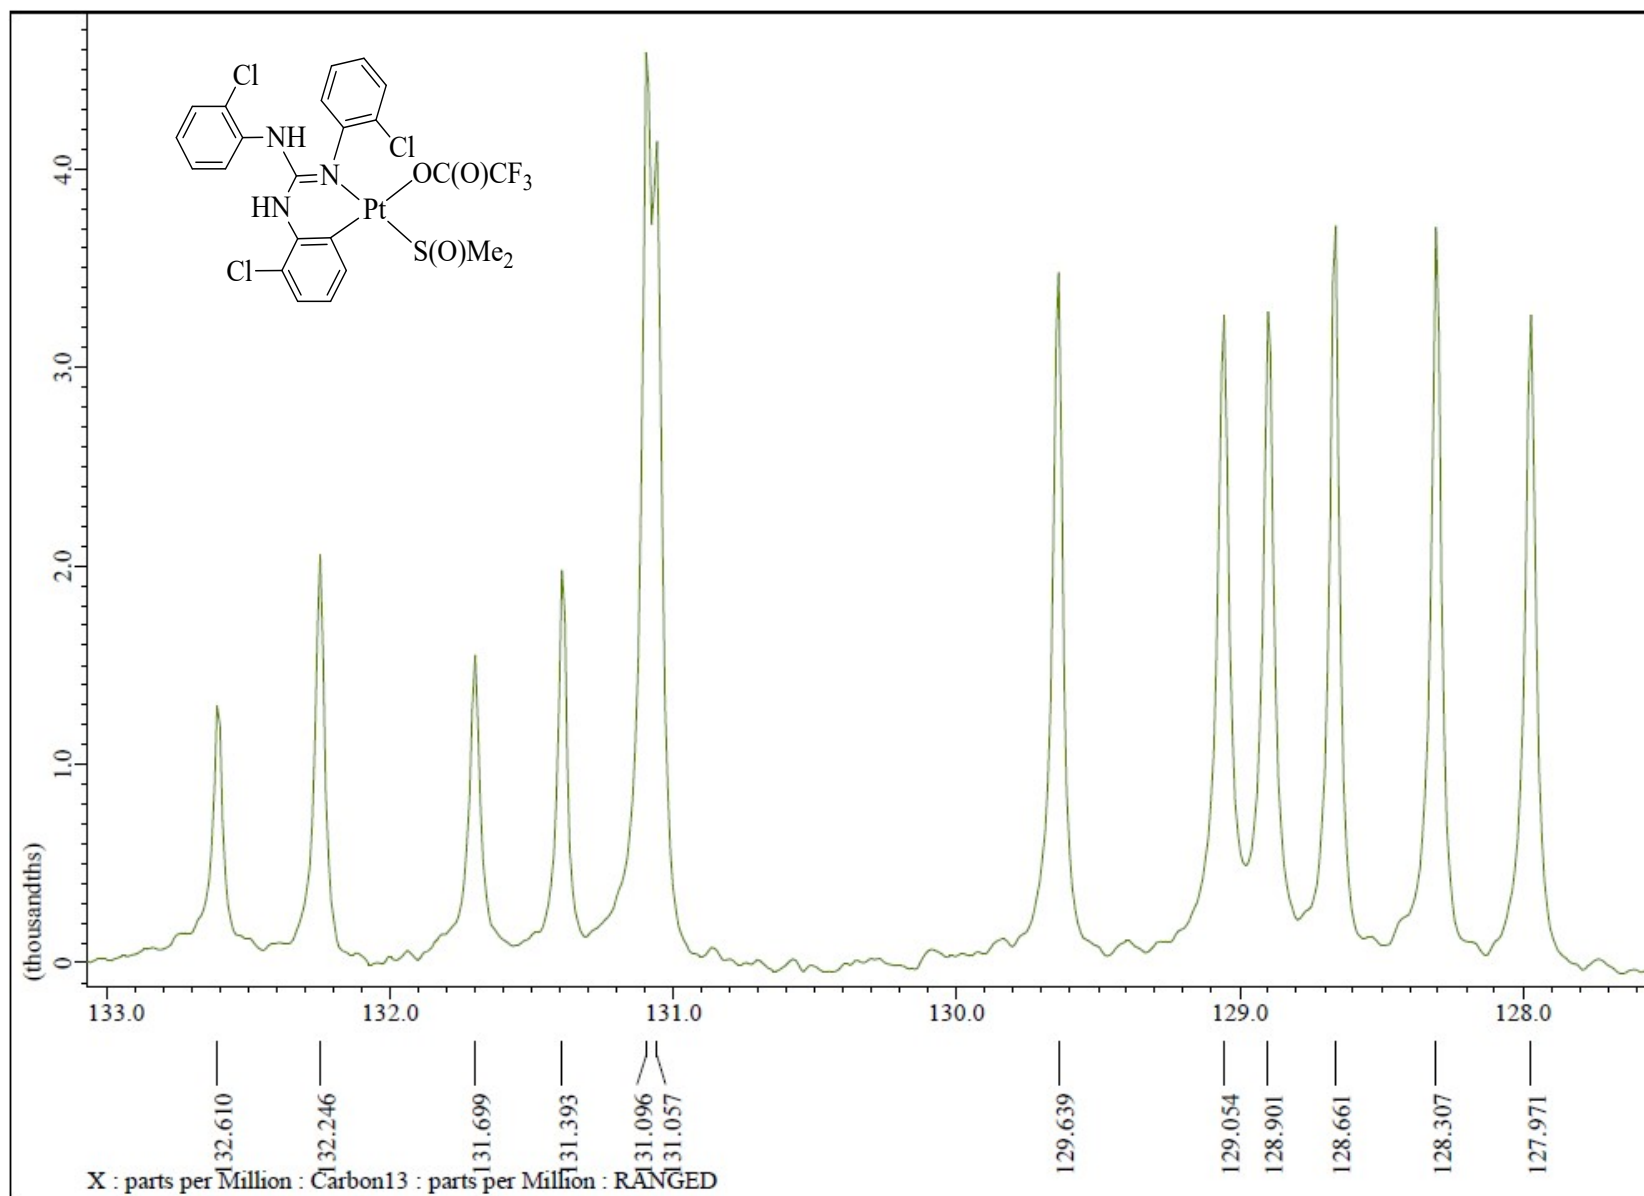

Fig. S33  $^{13}\text{C}\{^1\text{H}\}$  NMR (CDCl<sub>3</sub>, 100.5 MHz) spectrum of **7** in the indicated region.

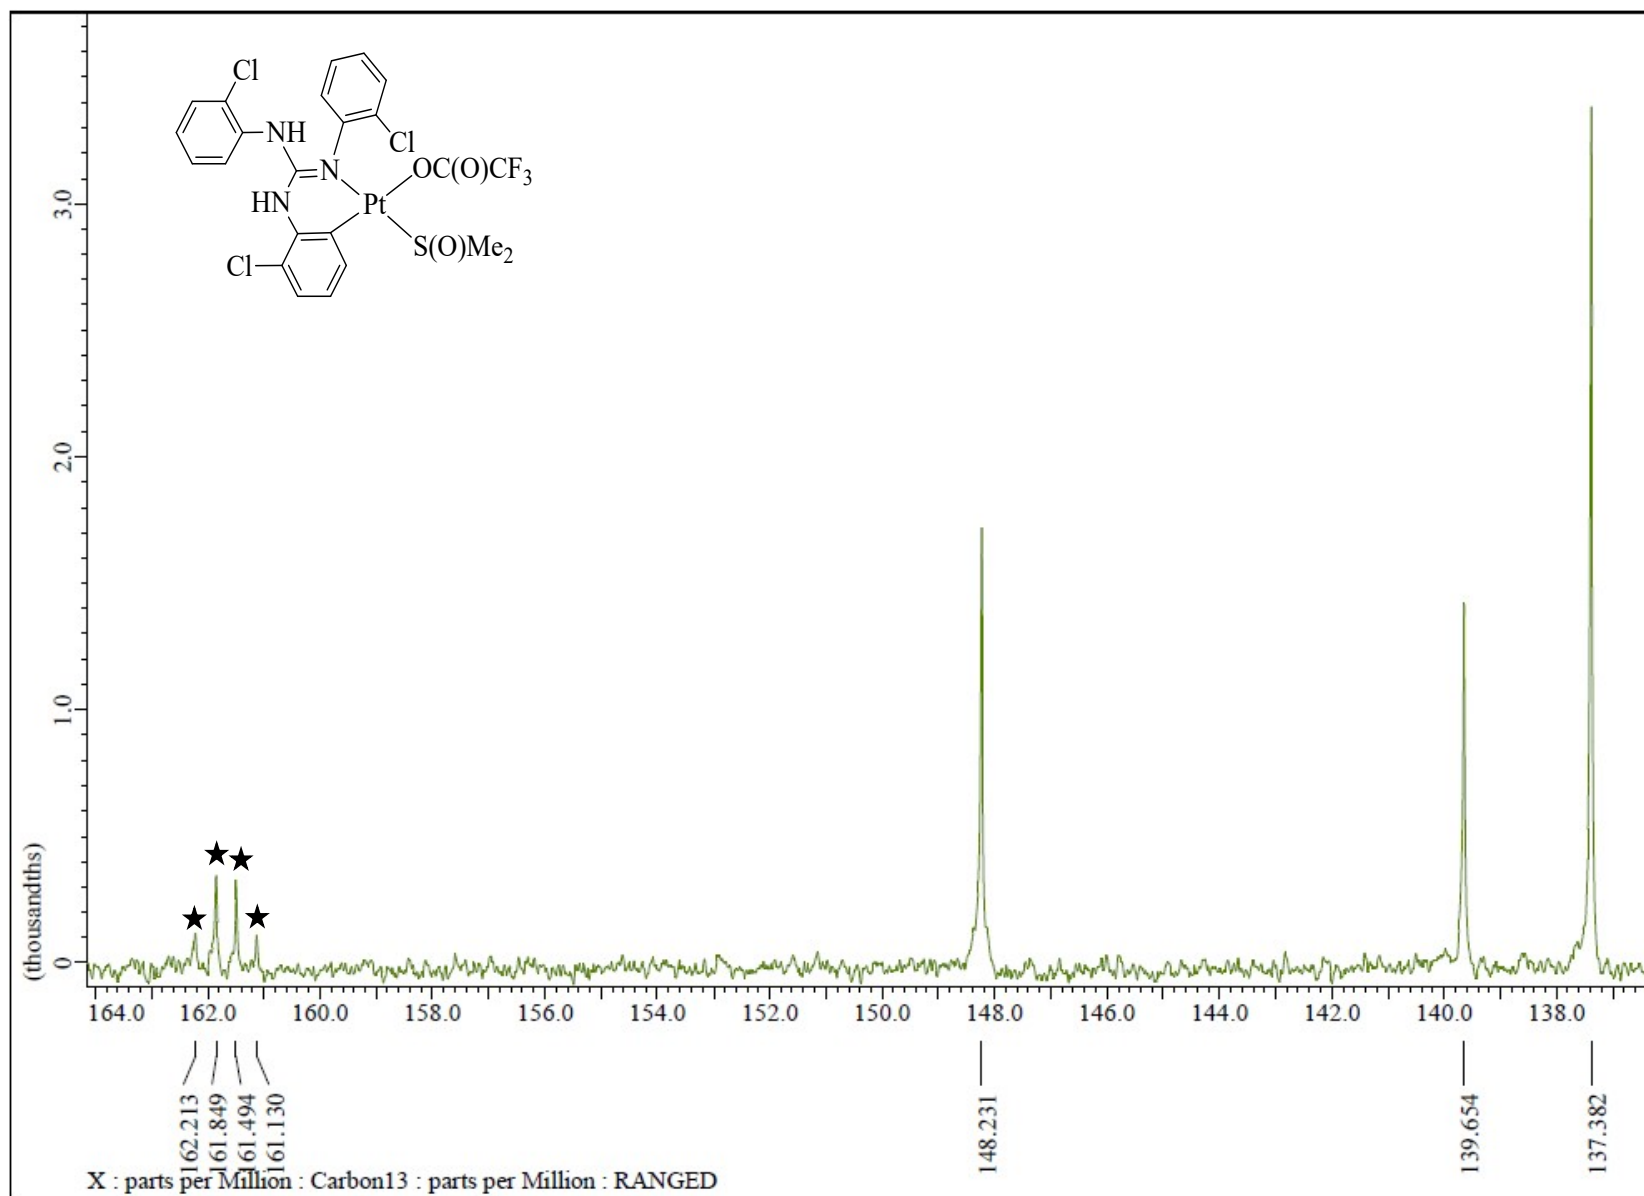

Fig. S34  $^{13}\text{C}\{^1\text{H}\}$  NMR (CDCl<sub>3</sub>, 100.5 MHz) spectrum of 7 in the indicated region.

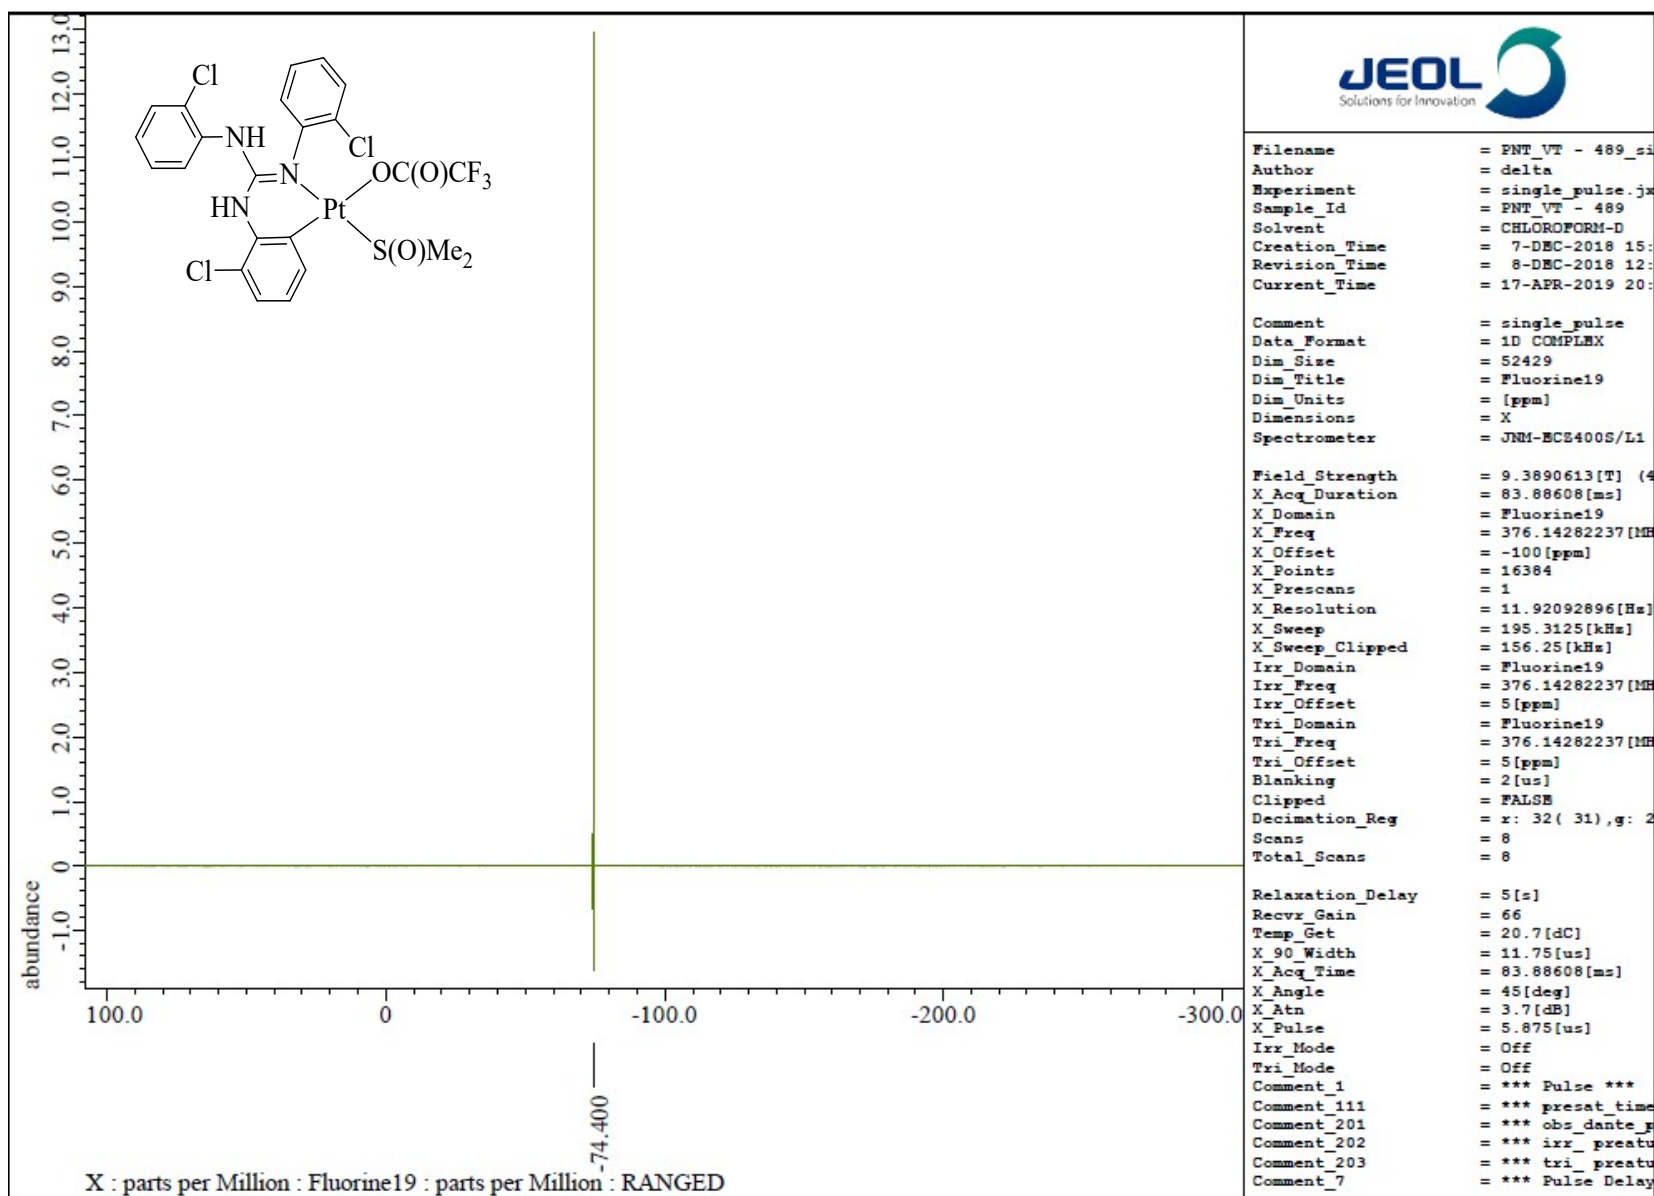

Fig. S35  $^{19}\text{F}\{^1\text{H}\}$  NMR ( $\text{CDCl}_3$ , 376.31 MHz) spectrum of 7.

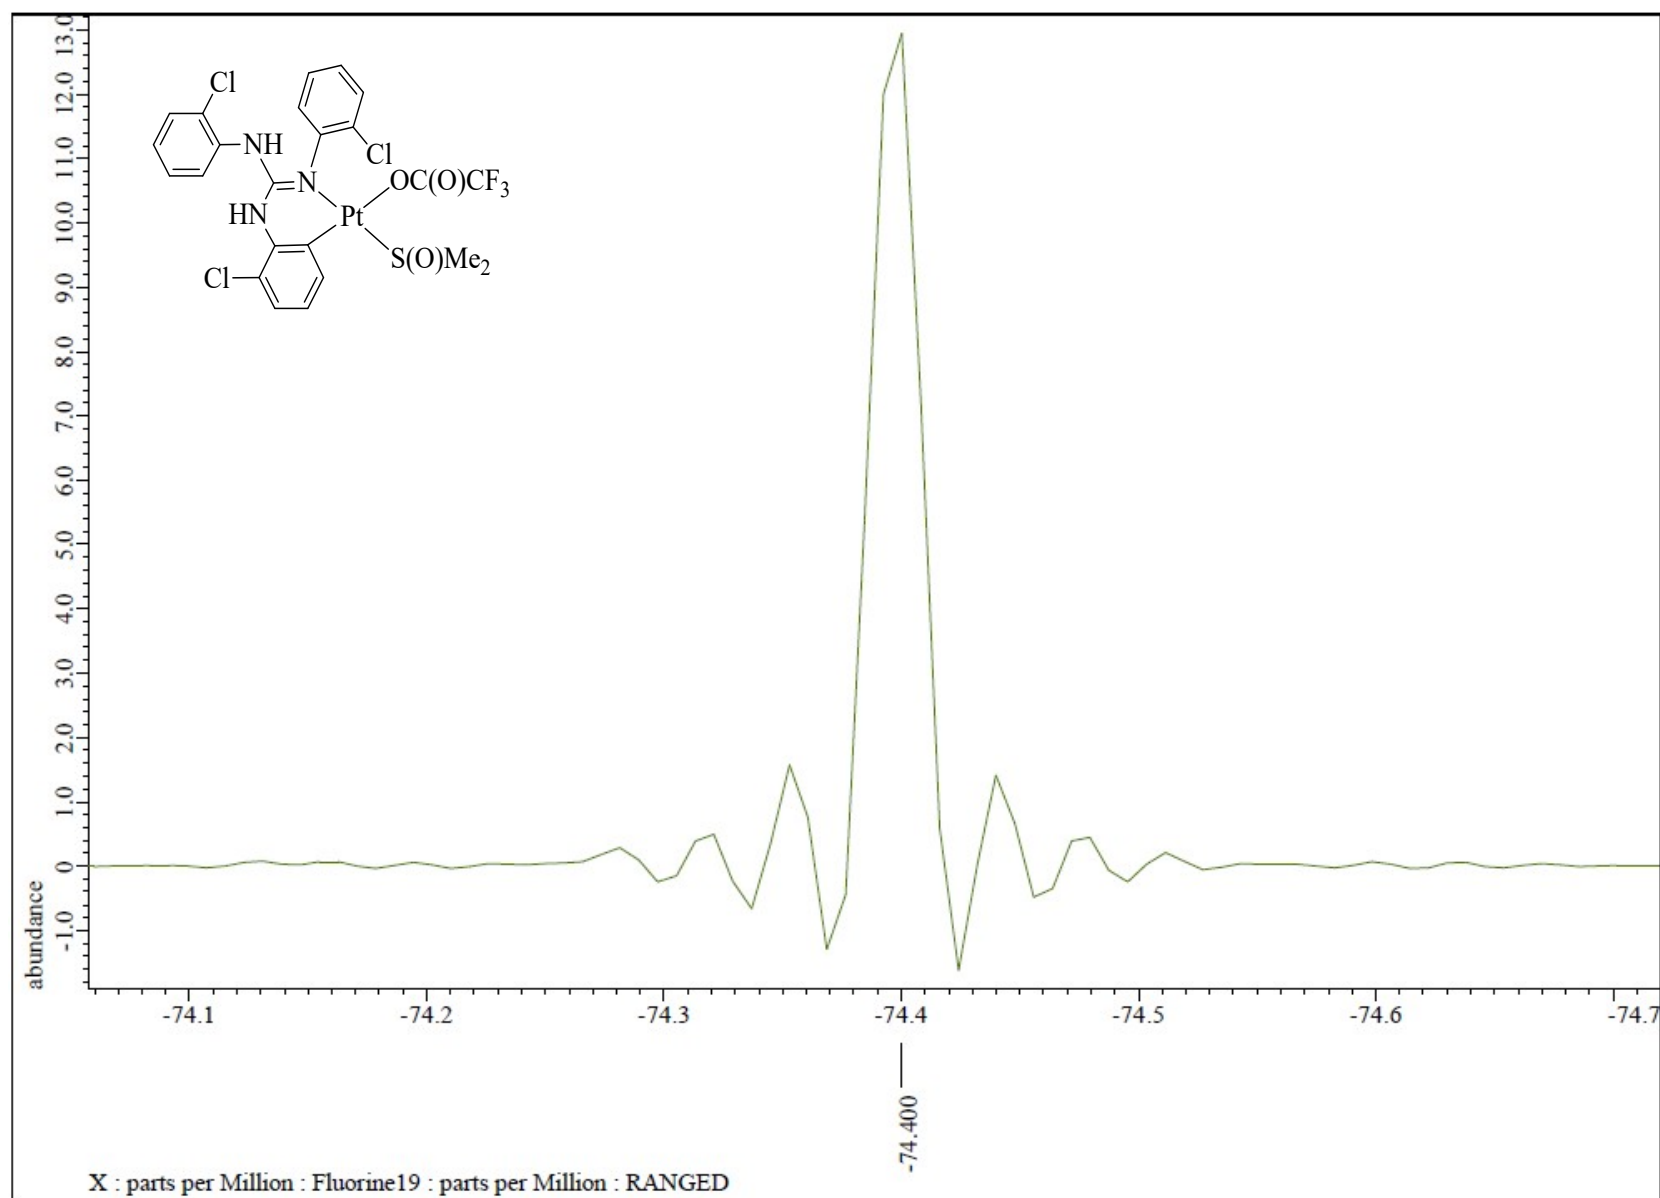

**Fig. S36**  $^{19}\text{F}$   $\{^1\text{H}\}$  NMR ( $\text{CDCl}_3$ , 376.31 MHz) spectrum of **7** in the indicated region.

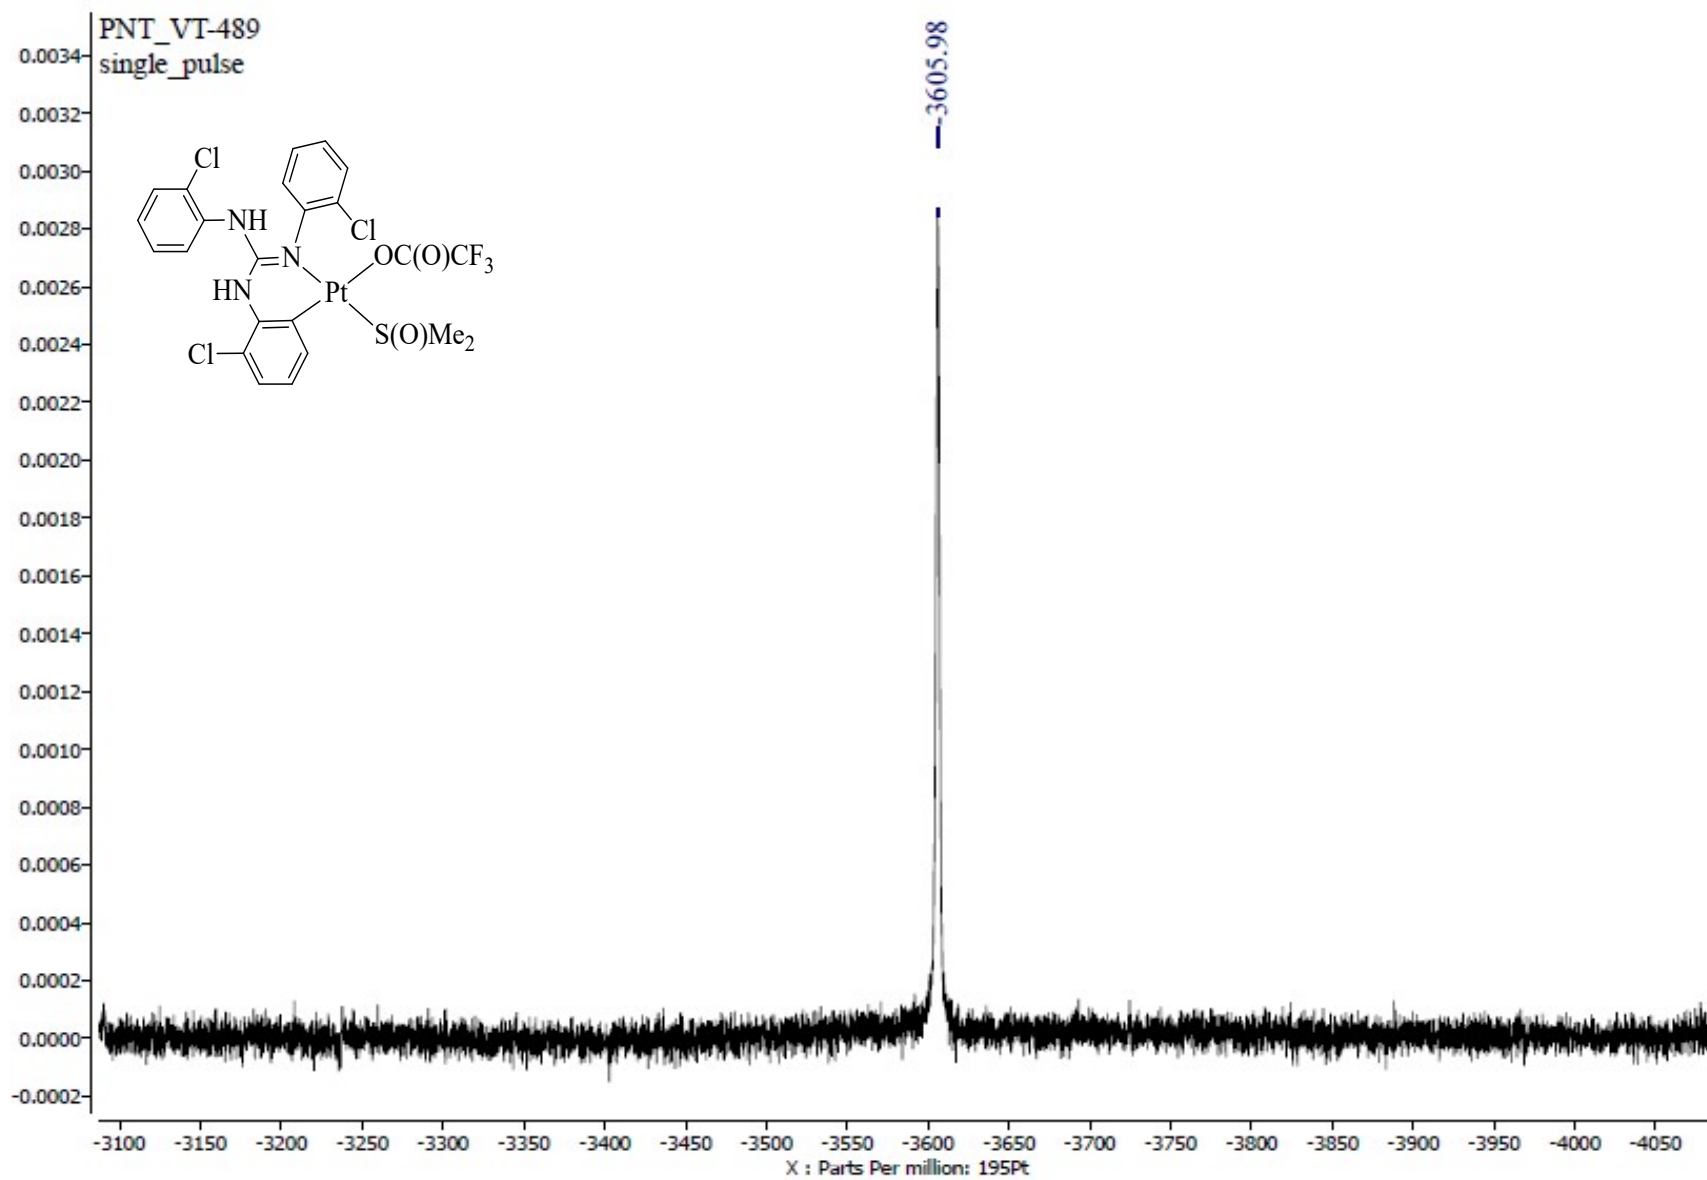

Fig. S37  $^{195}\text{Pt}\{^1\text{H}\}$  NMR ( $\text{CDCl}_3$ , 85.8 MHz) spectrum of 7.

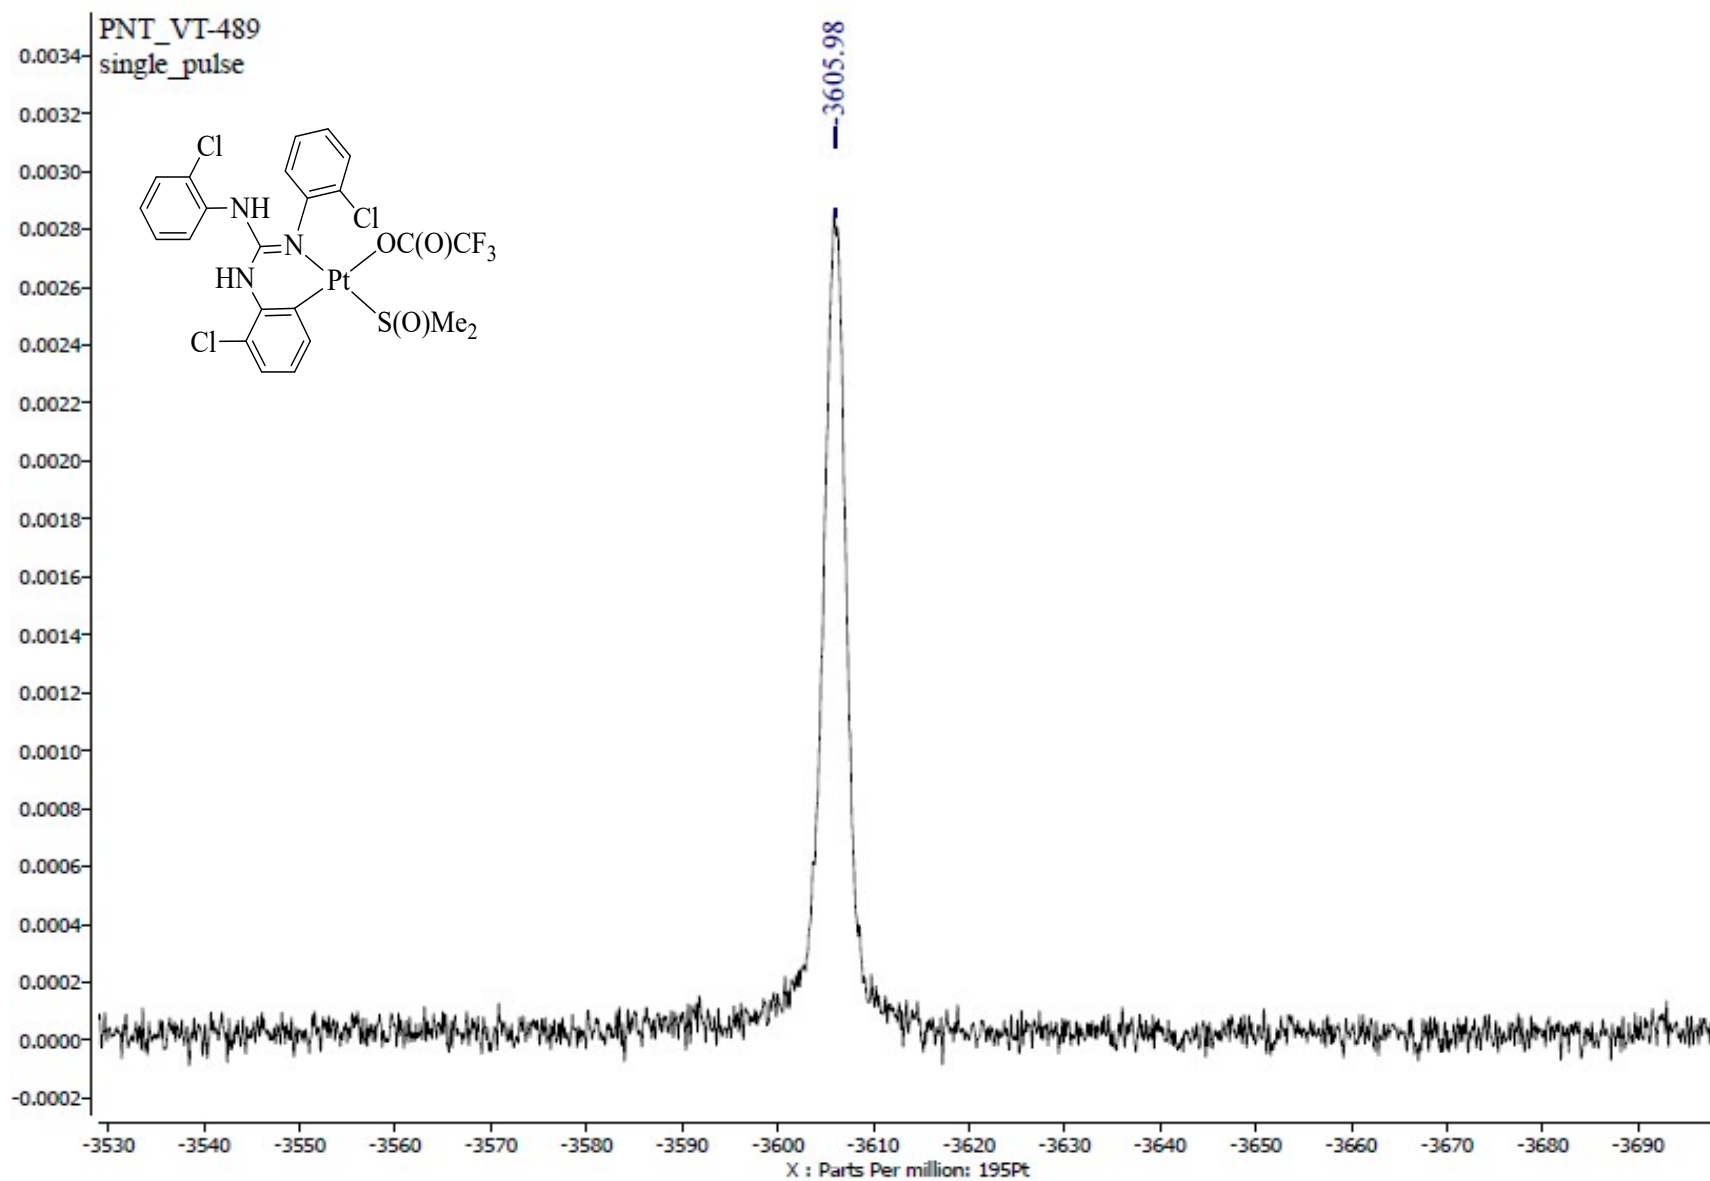

Fig. S38  $^{195}\text{Pt}\{^1\text{H}\}$  NMR ( $\text{CDCl}_3$ , 85.8 MHz) spectrum of **27**.



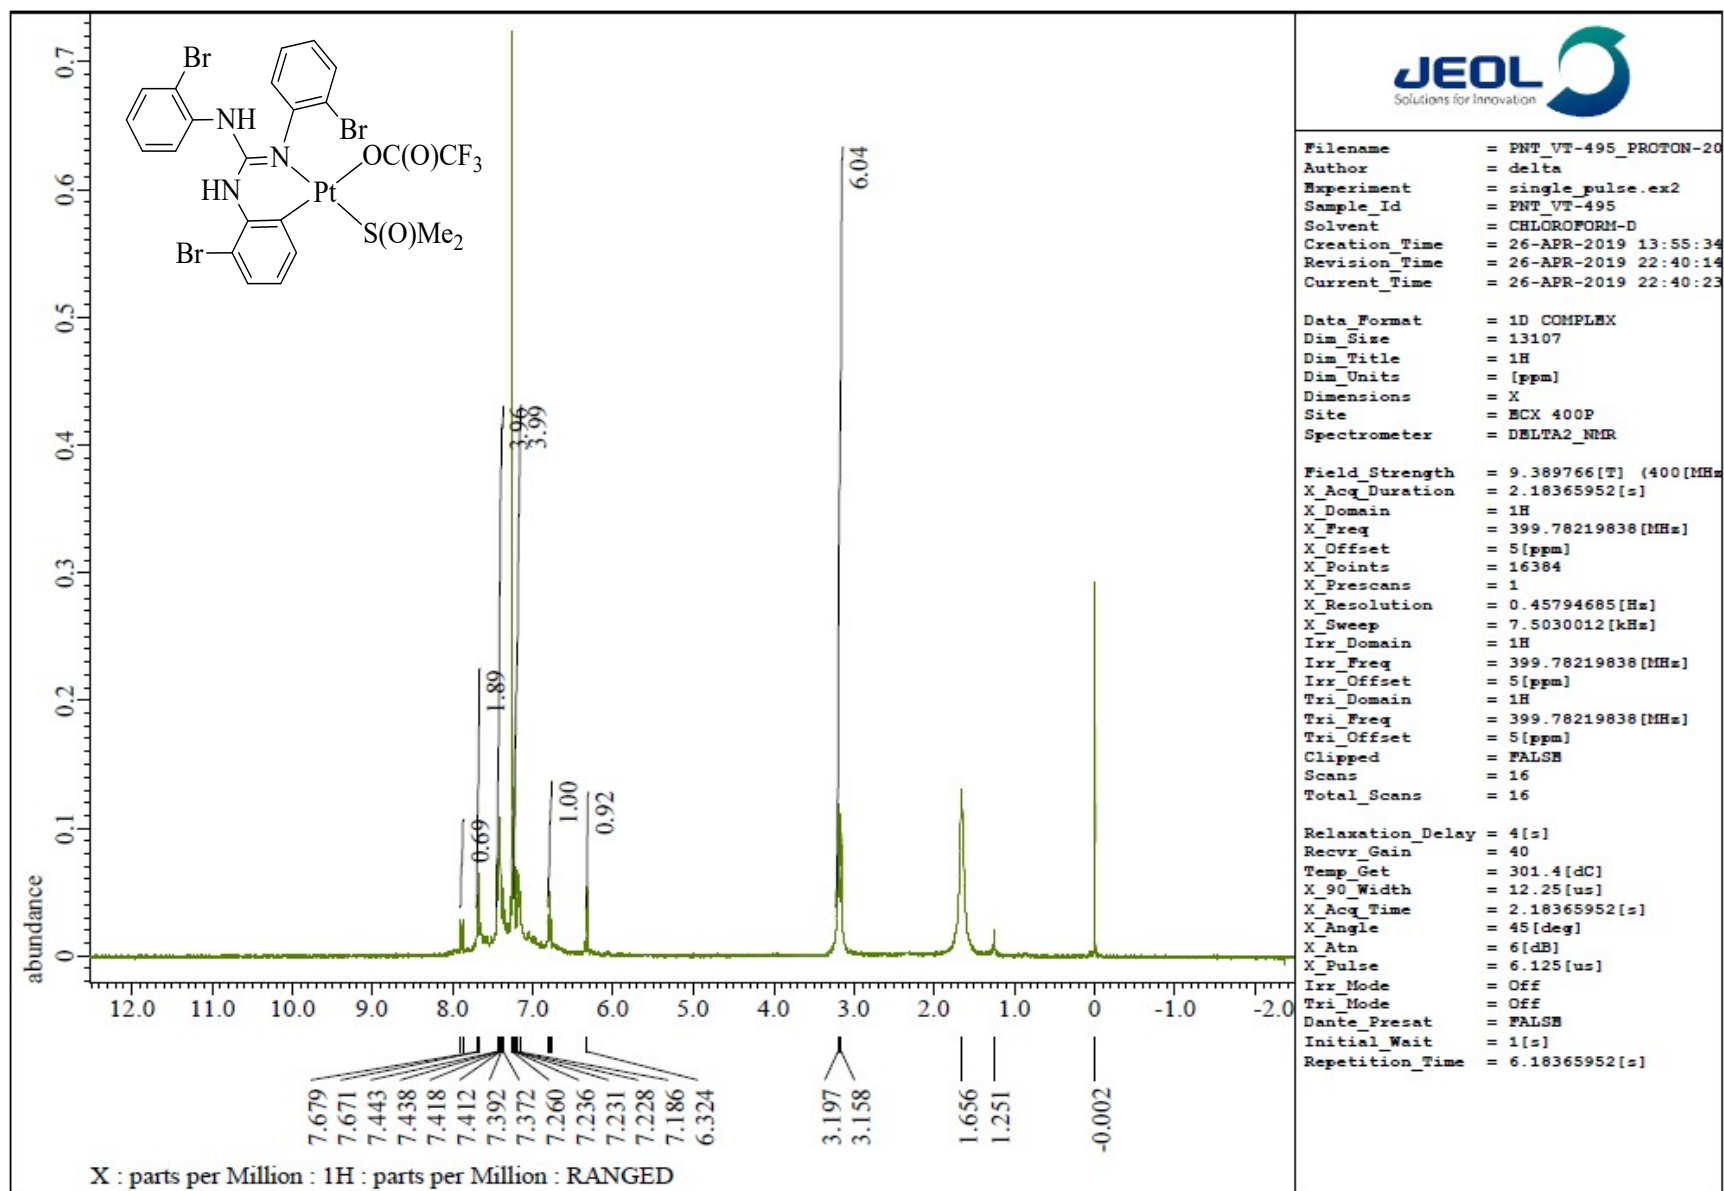

Fig. S39 <sup>1</sup>H NMR (CDCl<sub>3</sub>, 400 MHz) spectrum of 8.

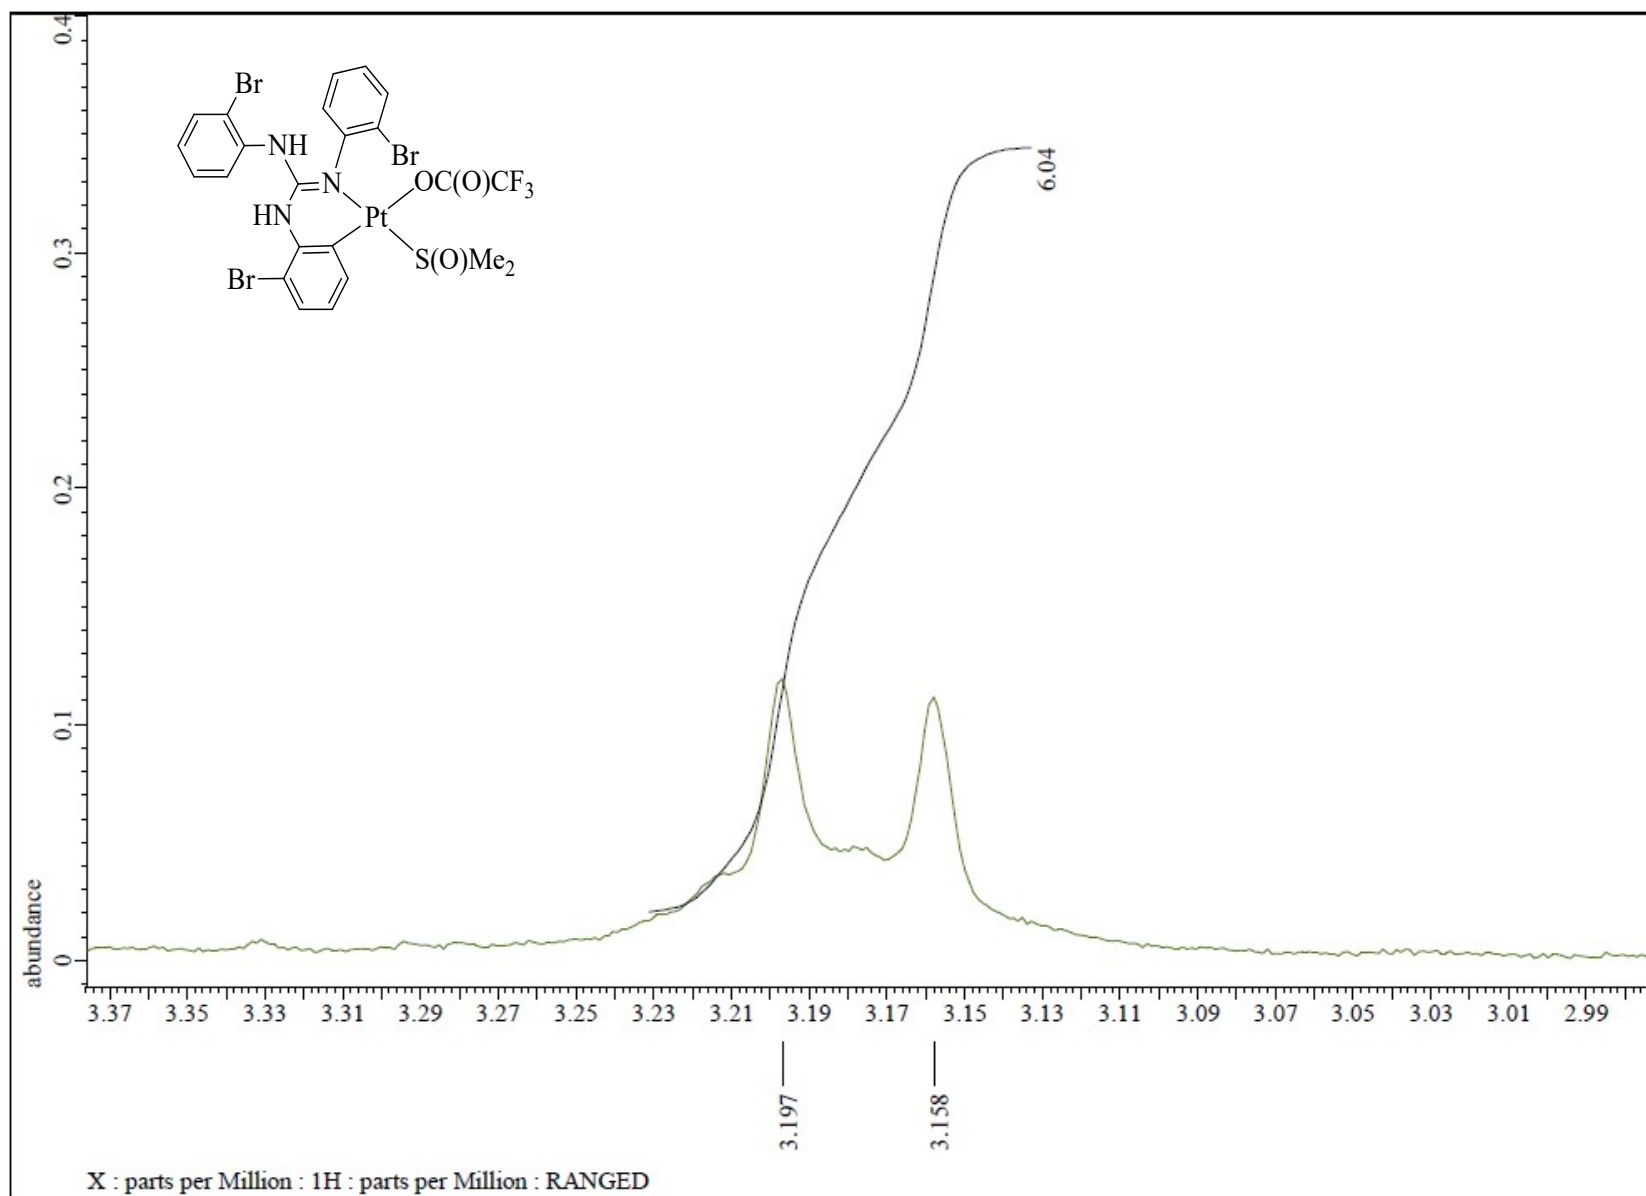

Fig. S40  $^1\text{H}$  NMR ( $\text{CDCl}_3$ , 400 MHz) spectrum of **8** in the indicated region.

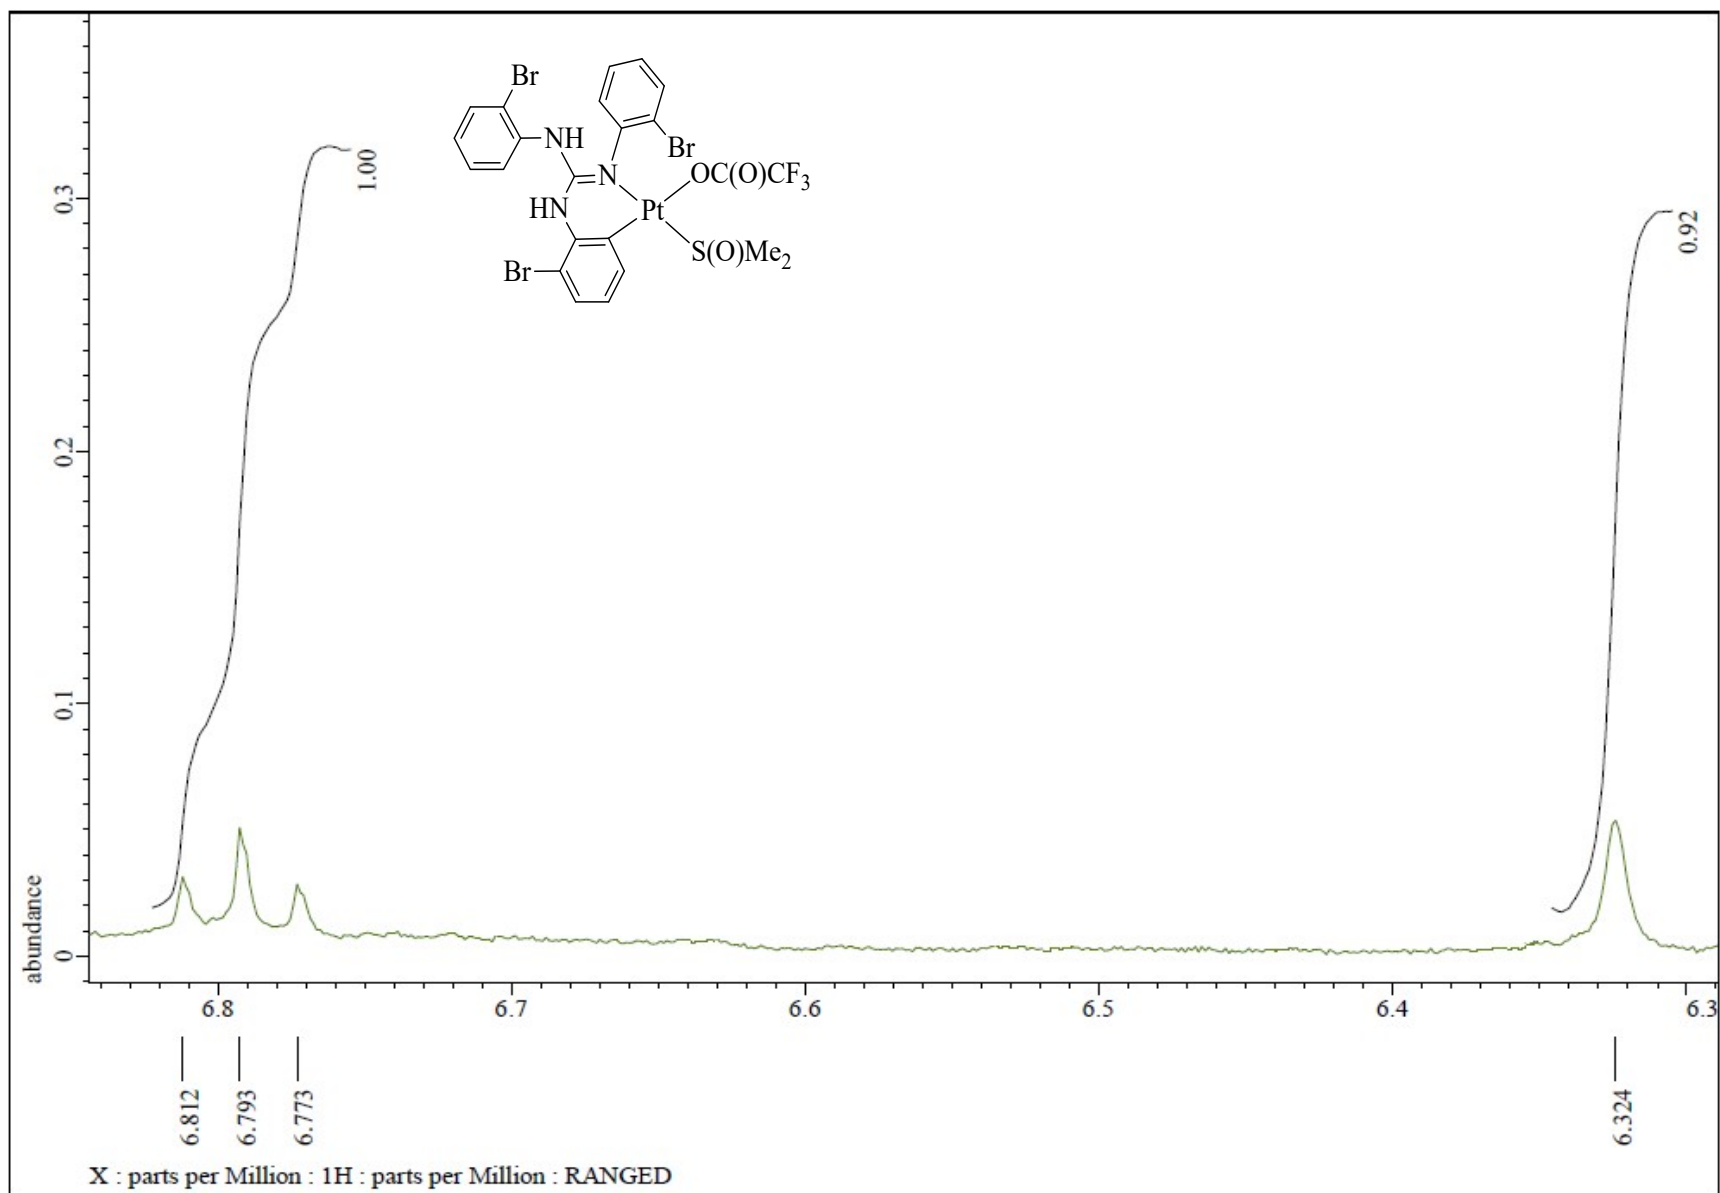

Fig. S41  $^1\text{H}$  NMR ( $\text{CDCl}_3$ , 400 MHz) spectrum of **8** in the indicated region.

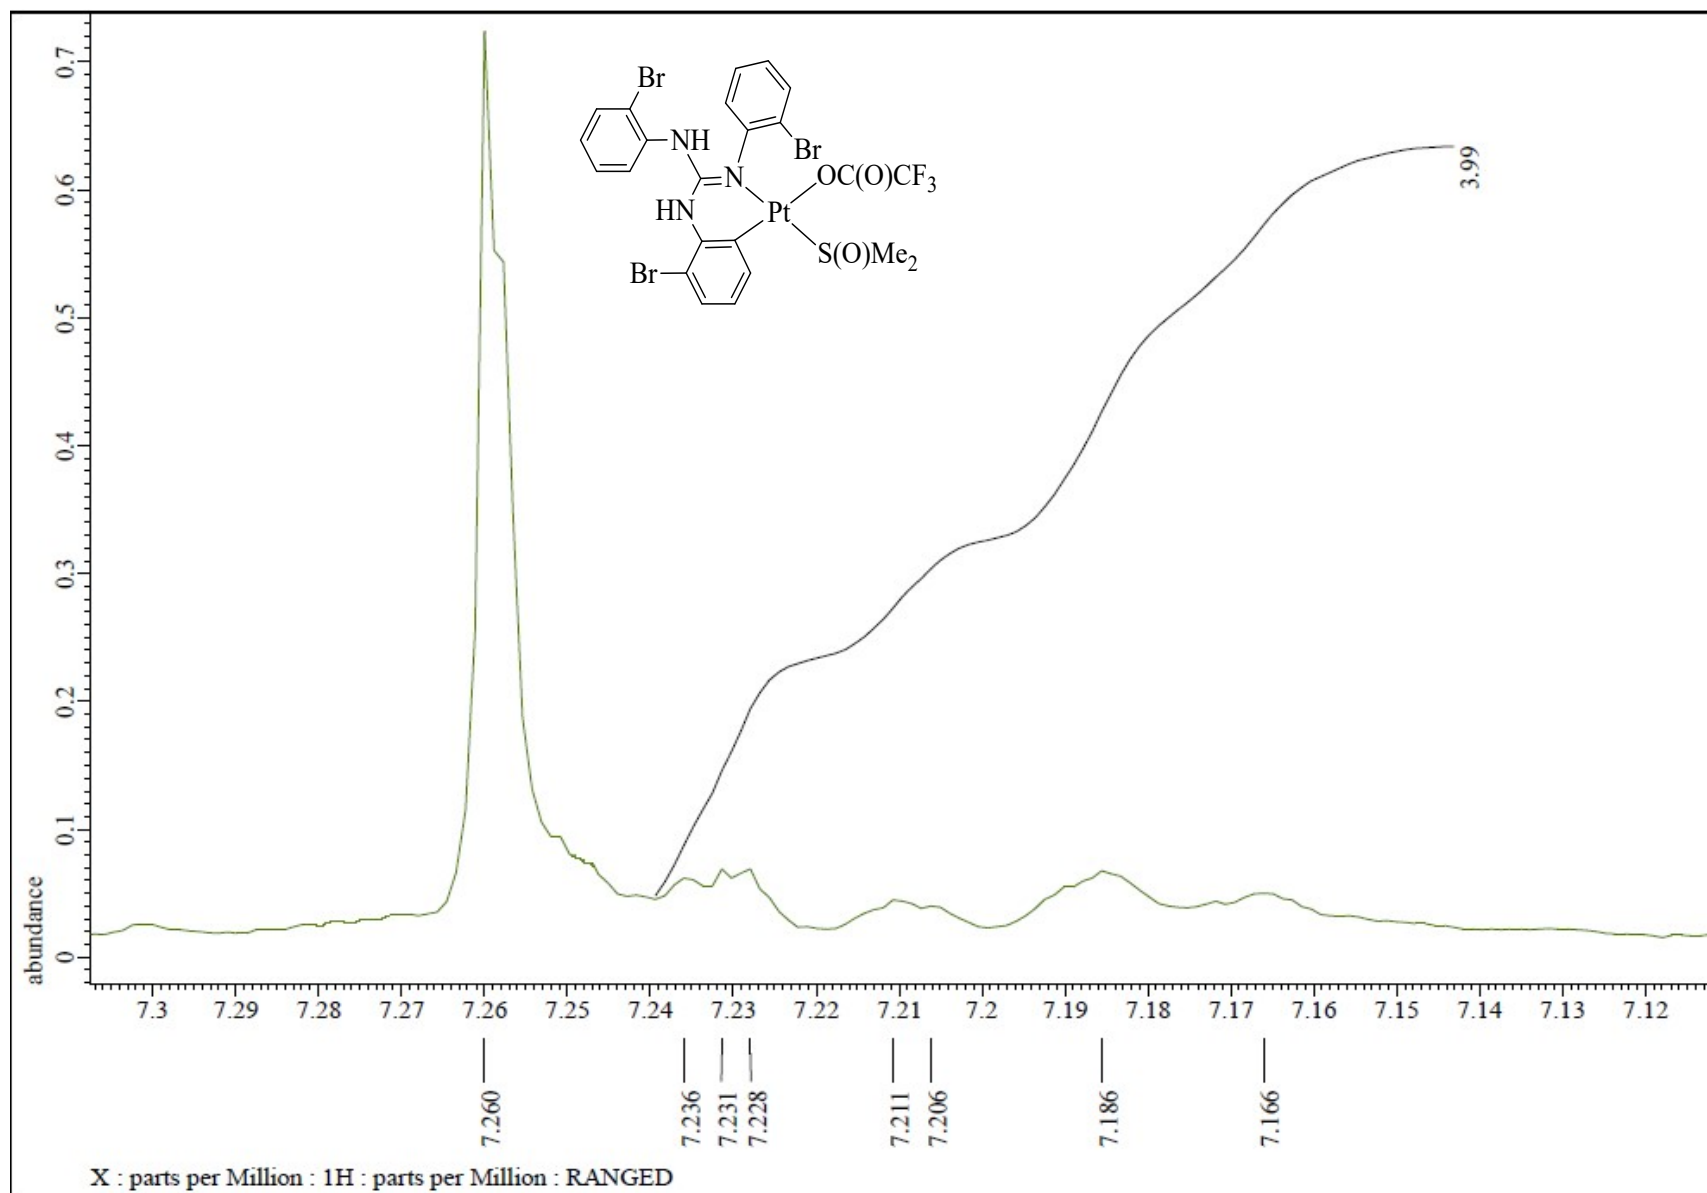

Fig. S42  $^1\text{H}$  NMR ( $\text{CDCl}_3$ , 400 MHz) spectrum of **8** in the indicated region.

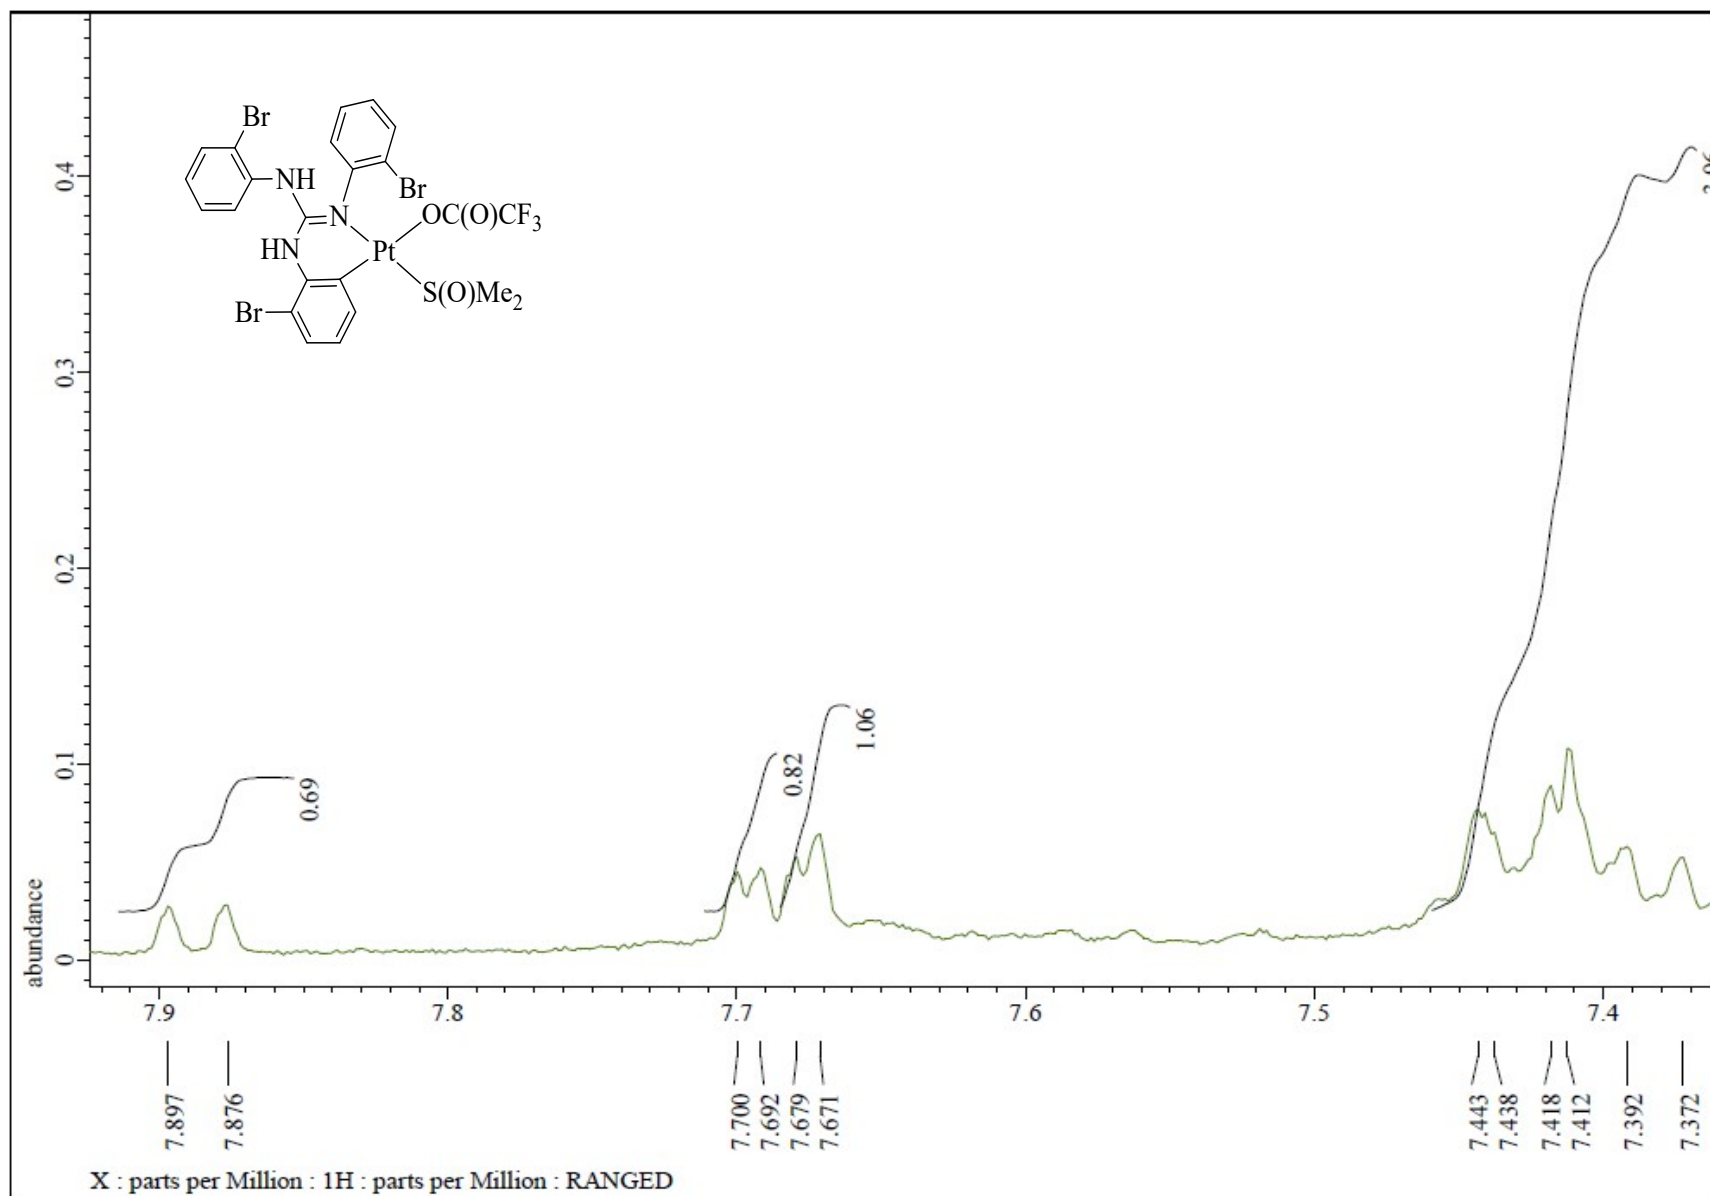

Fig. S43  $^1\text{H NMR}$  (CDCl<sub>3</sub>, 400 MHz) spectrum of **8** in the indicated region.

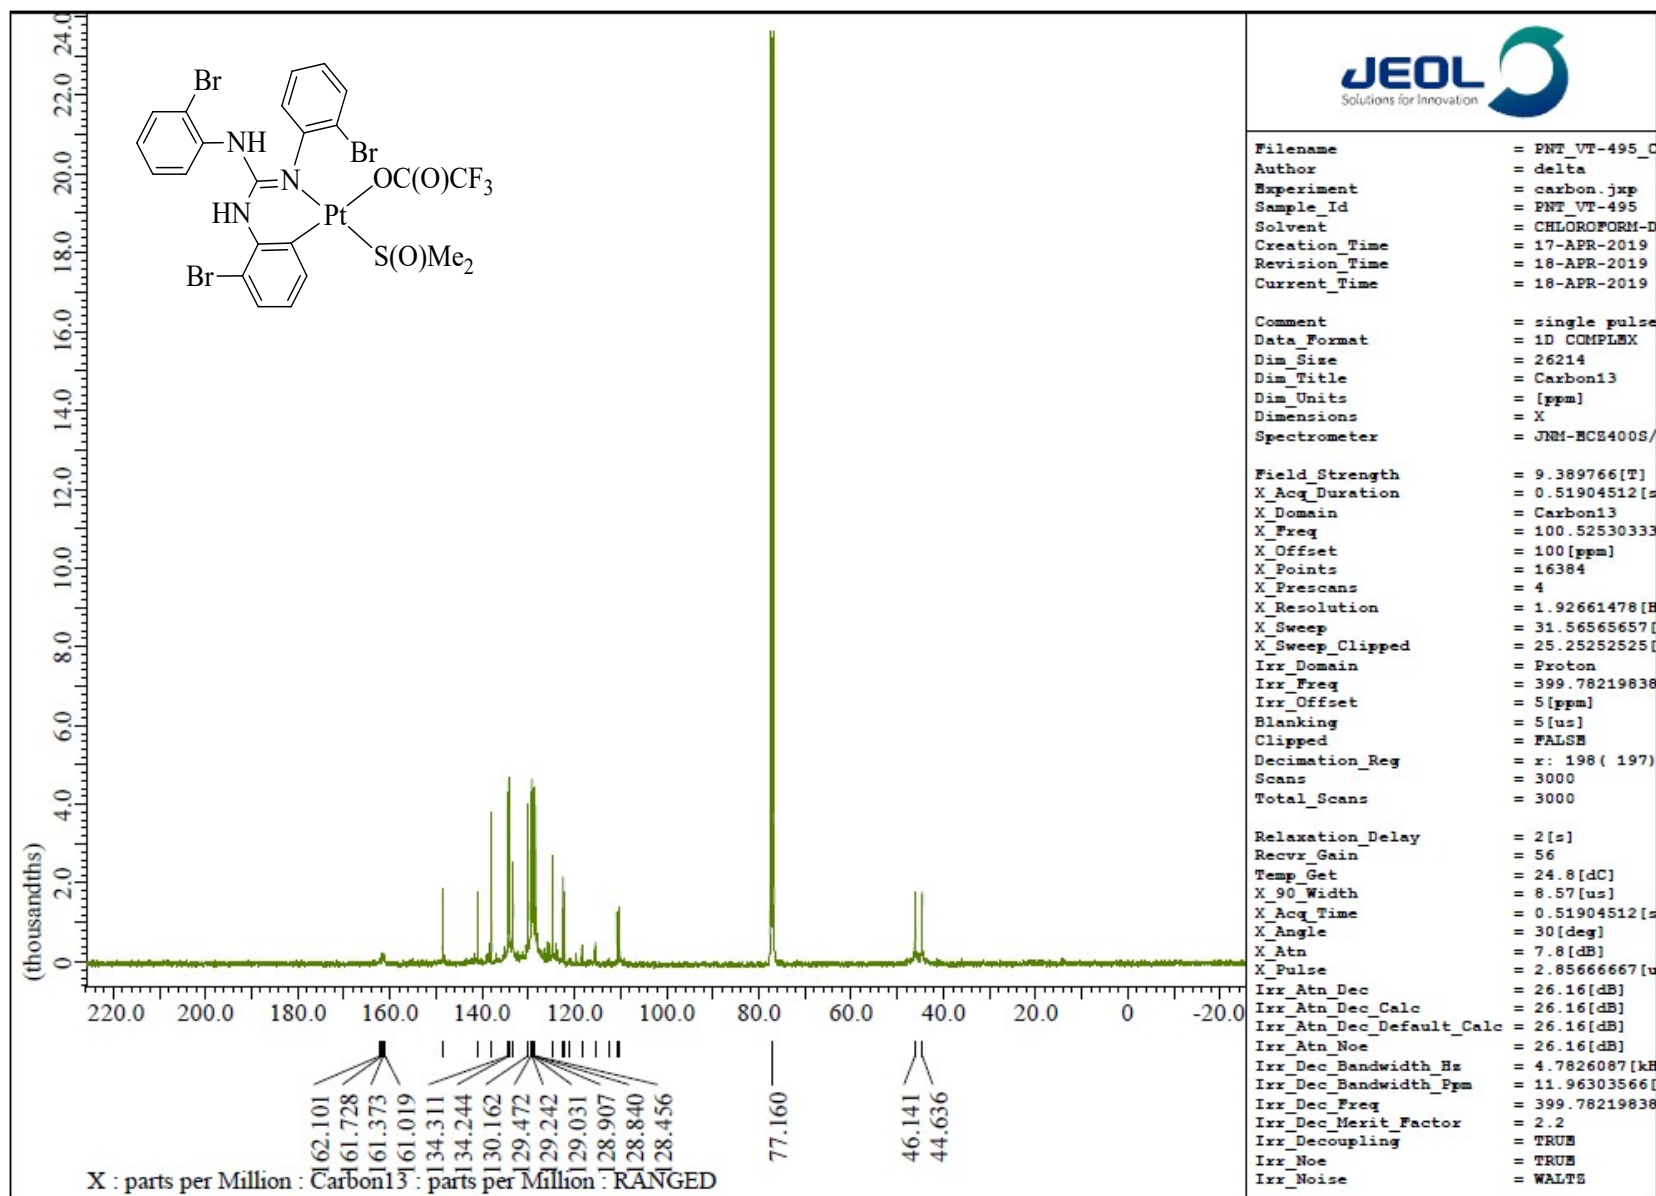

Fig. S44 <sup>13</sup>C NMR (CDCl<sub>3</sub>, 100.5 MHz) spectrum of **8**.

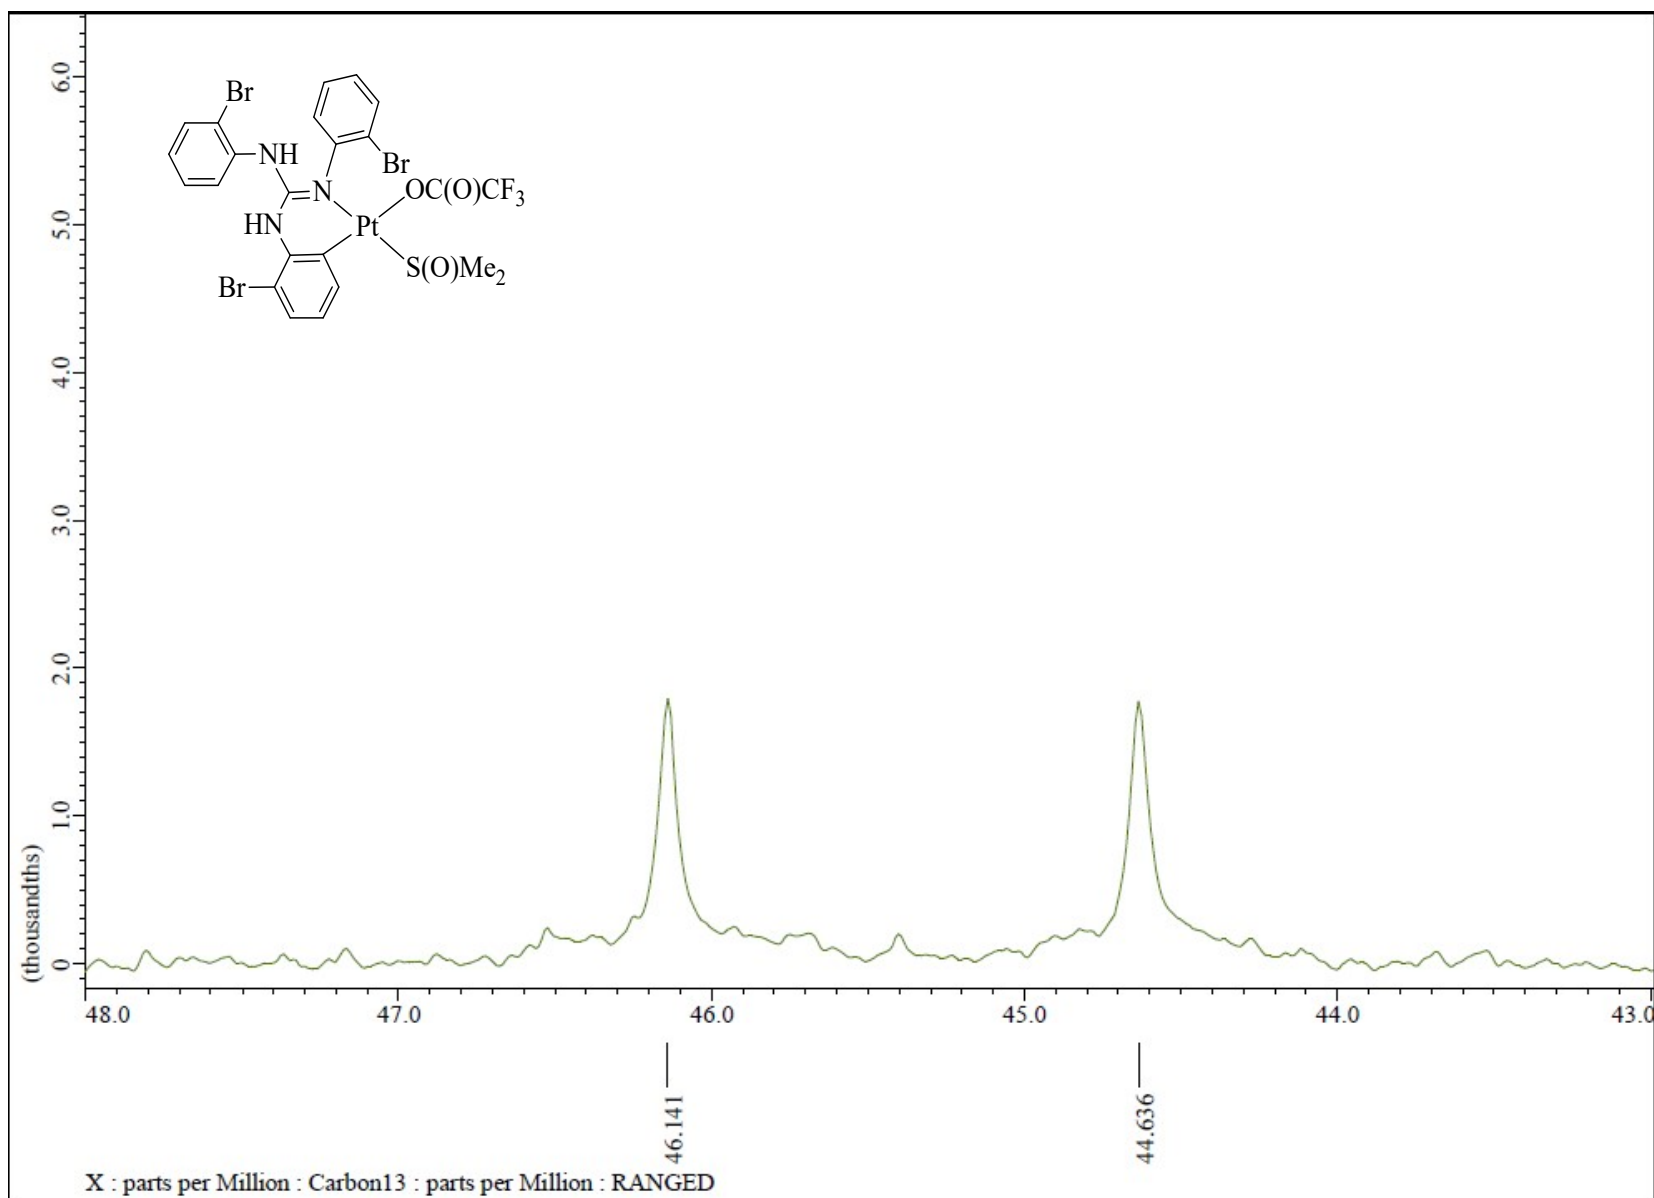

Fig. S45  $^{13}\text{C}$  NMR ( $\text{CDCl}_3$ , 100.5 MHz) spectrum of **8** in the indicated region.

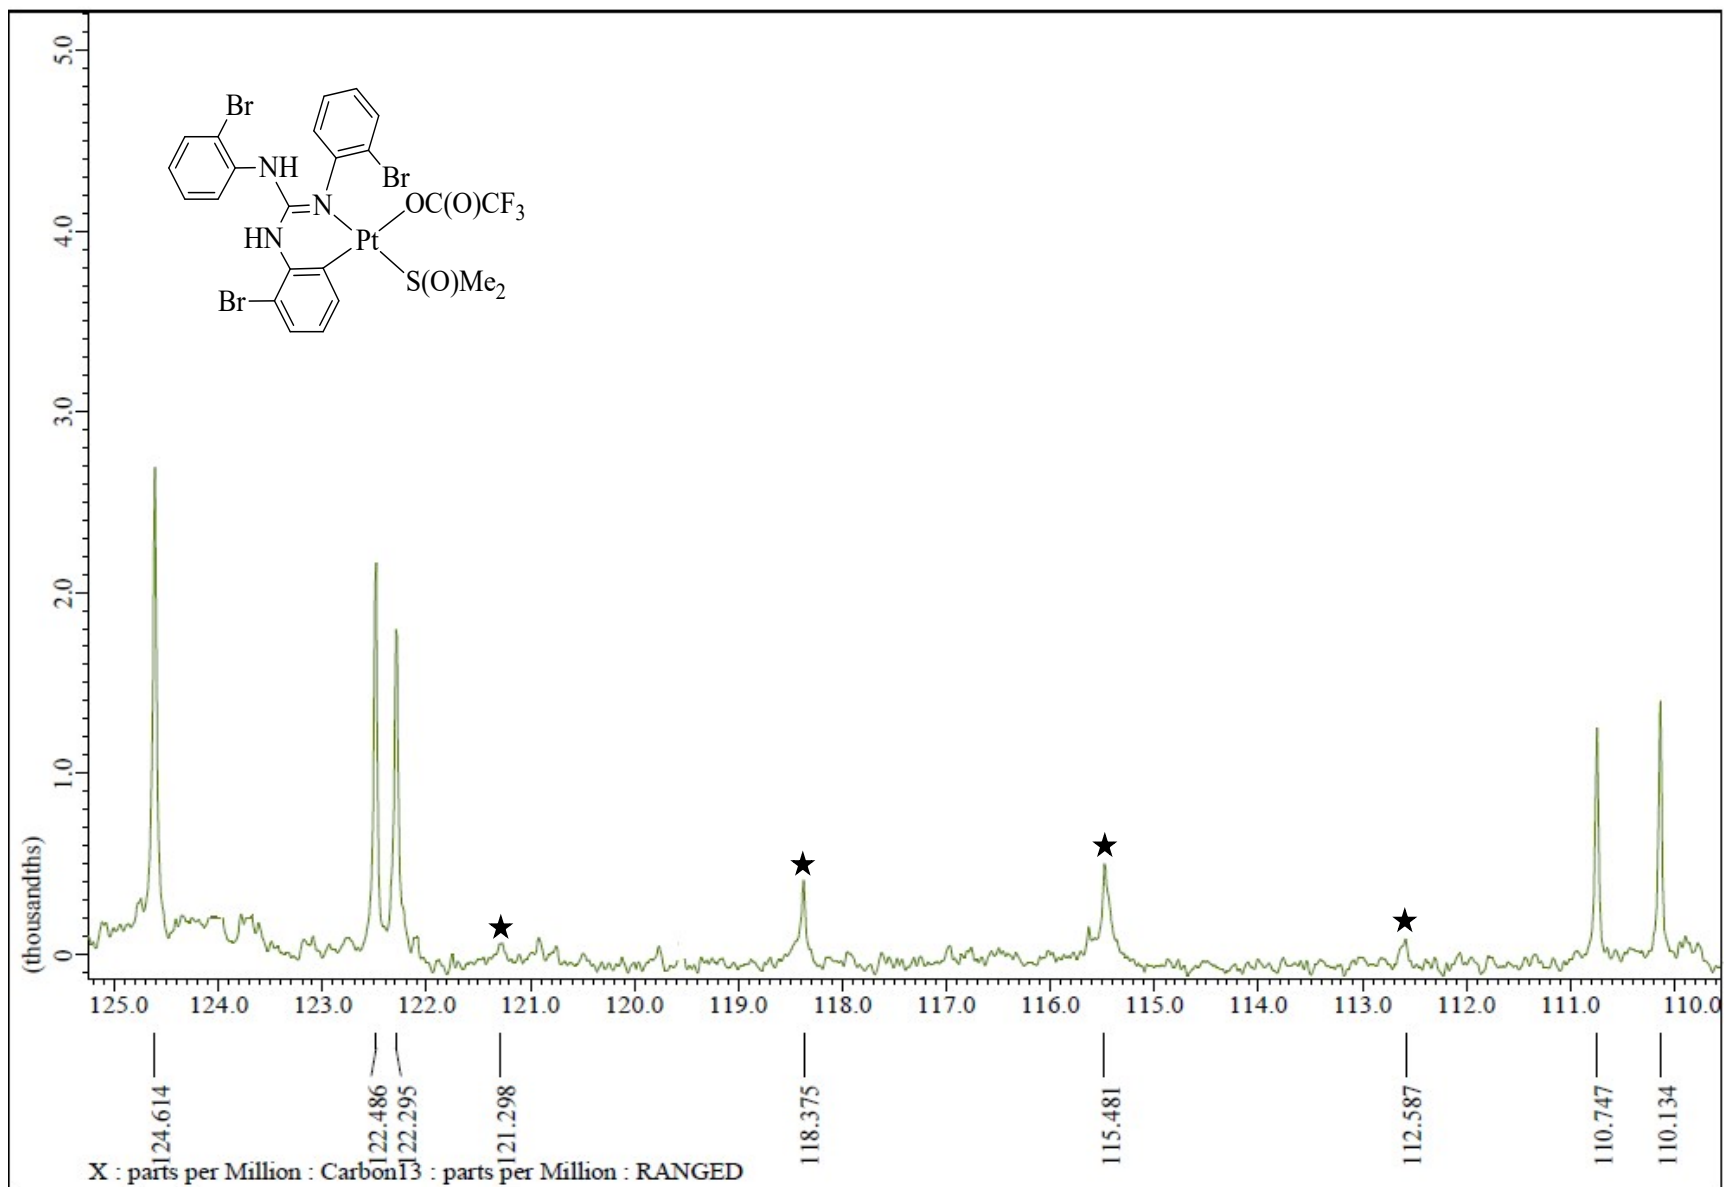

Fig. S46  $^{13}\text{C}$  NMR (CDCl<sub>3</sub>, 100.5 MHz) spectrum of **8** in the indicated region.



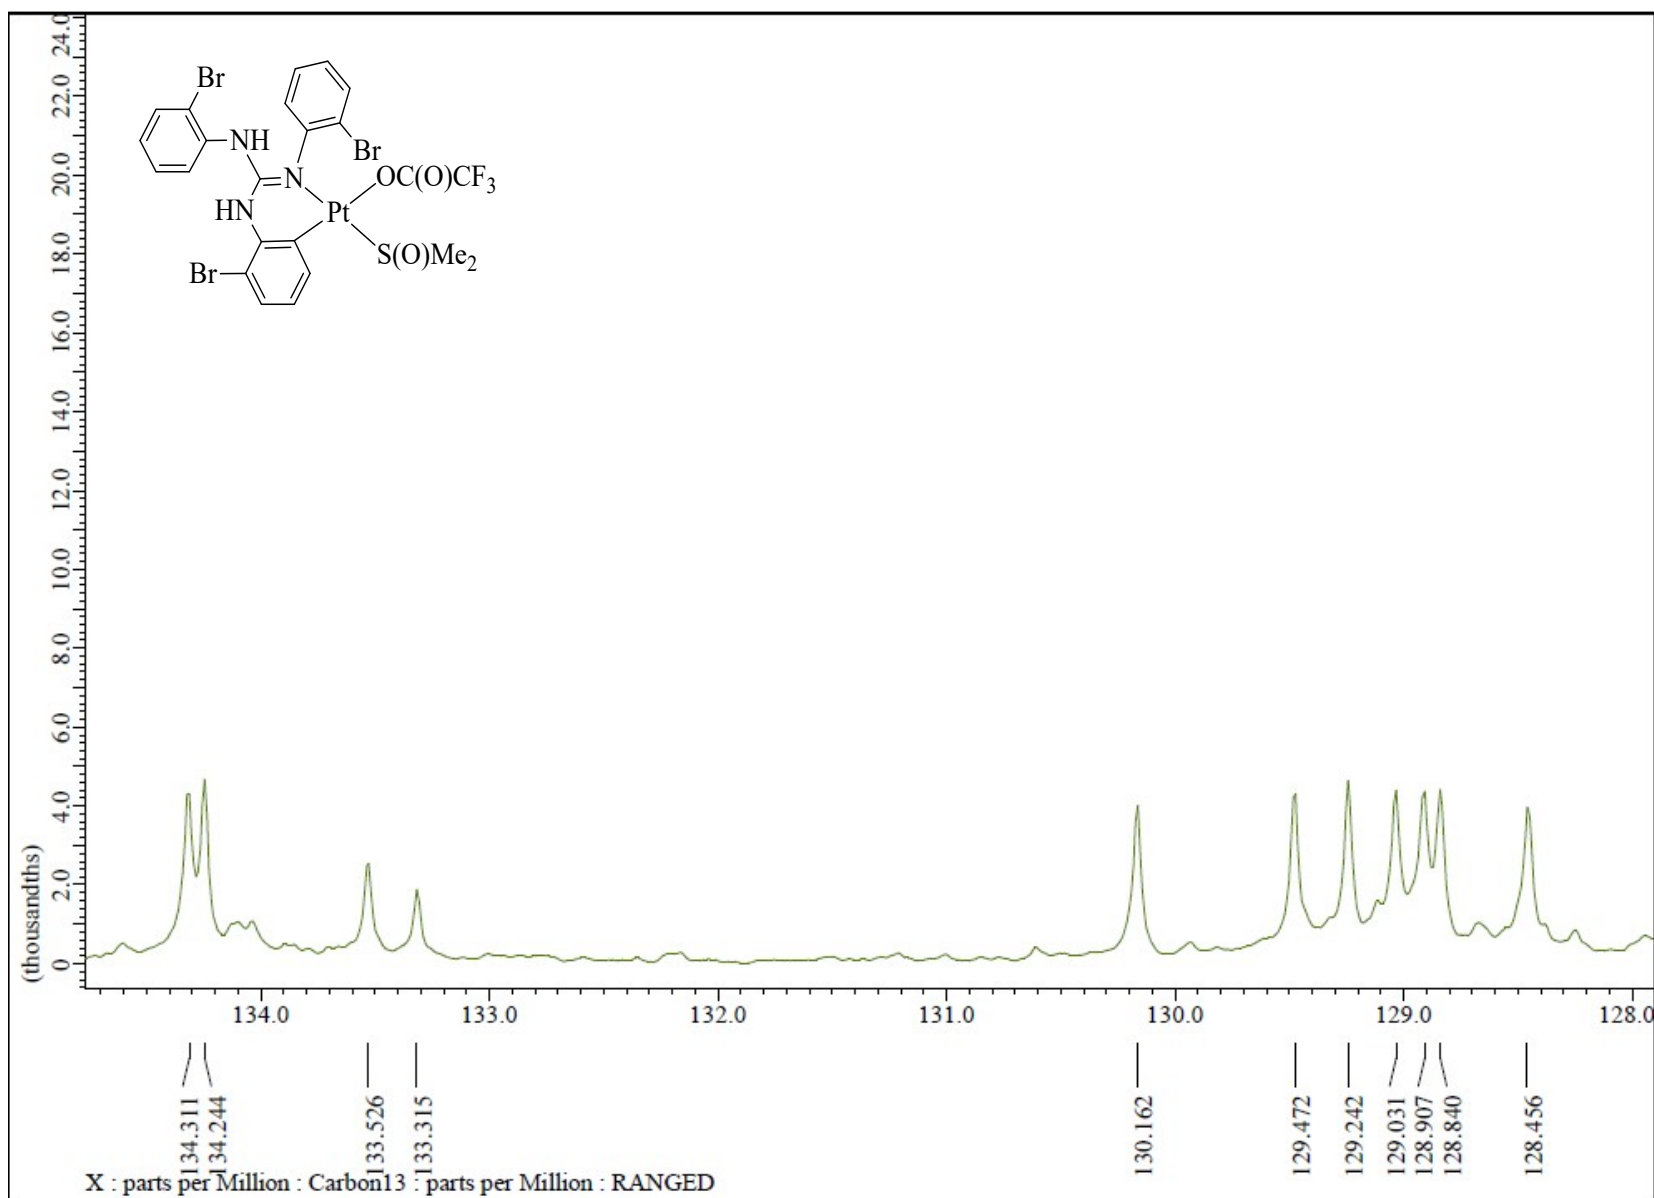

Fig. S47 <sup>13</sup>C NMR (CDCl<sub>3</sub>, 100.5 MHz) spectrum of **8** in the indicated region.

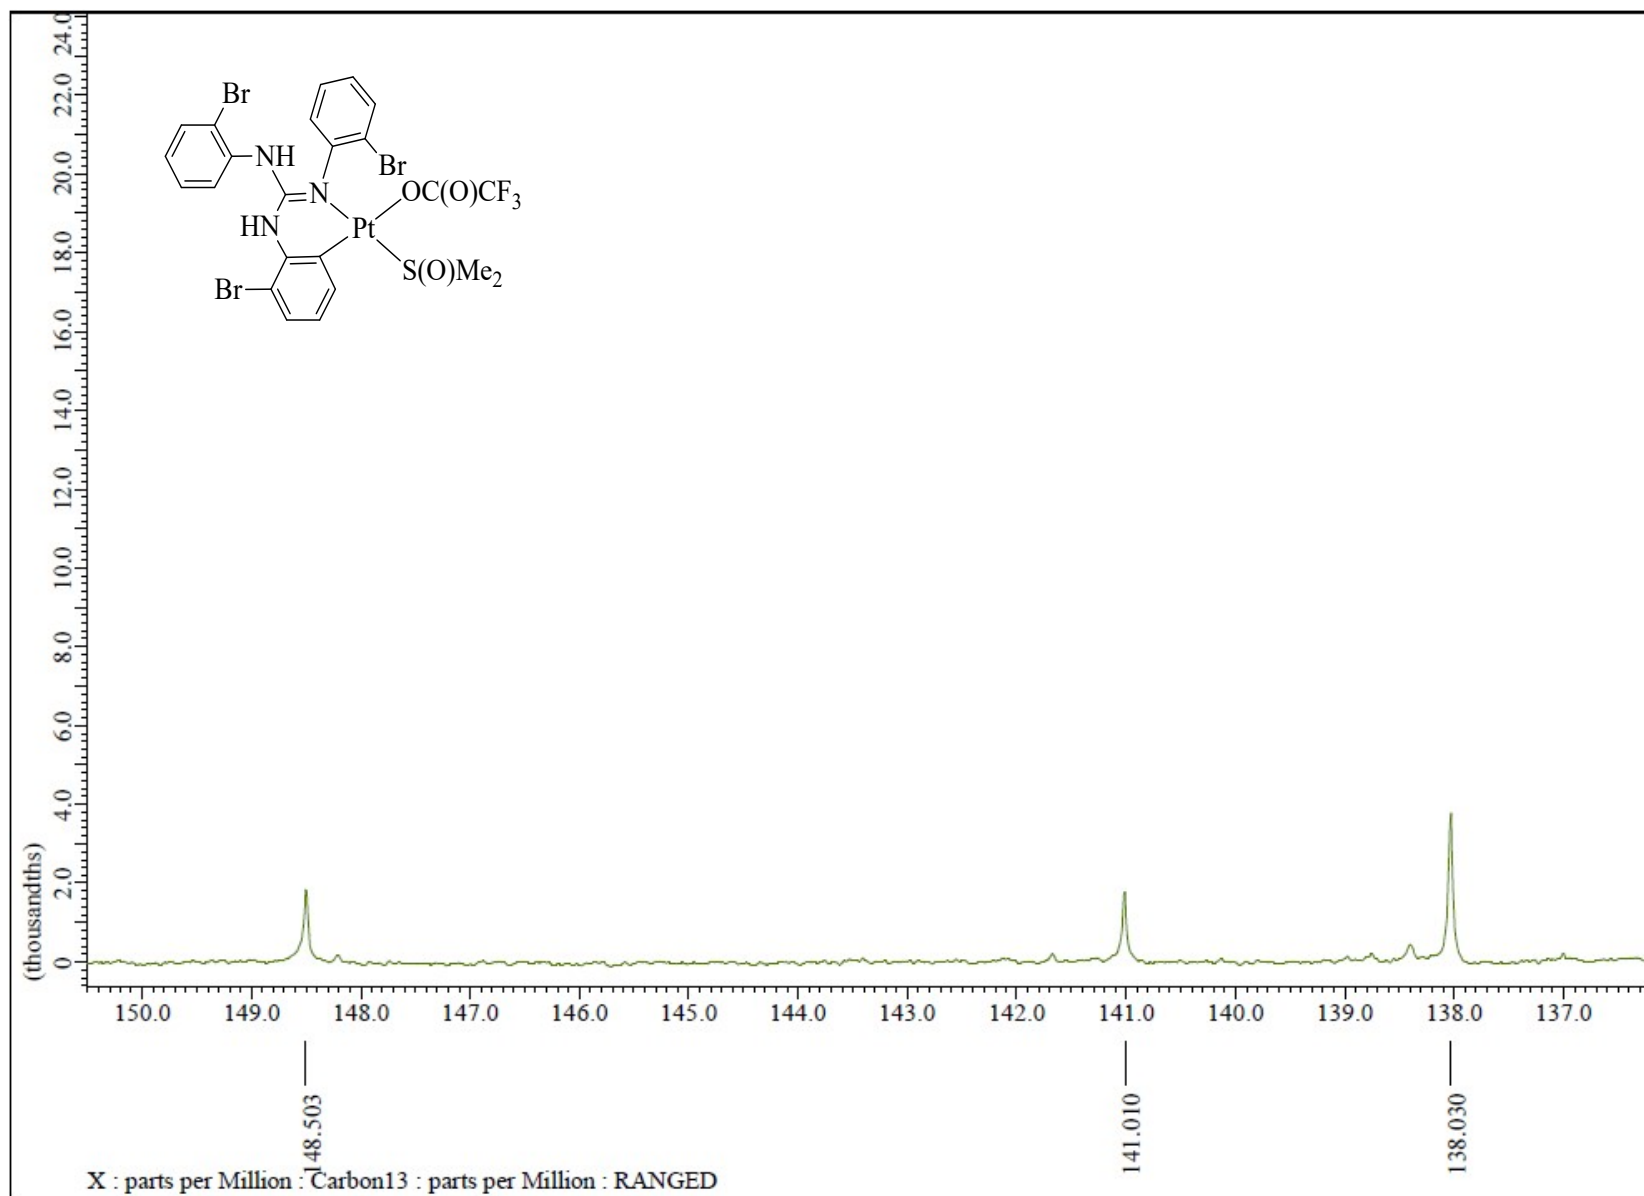

Fig. S48  $^{13}\text{C}$  NMR ( $\text{CDCl}_3$ , 100.5 MHz) spectrum of **8** in the indicated region.

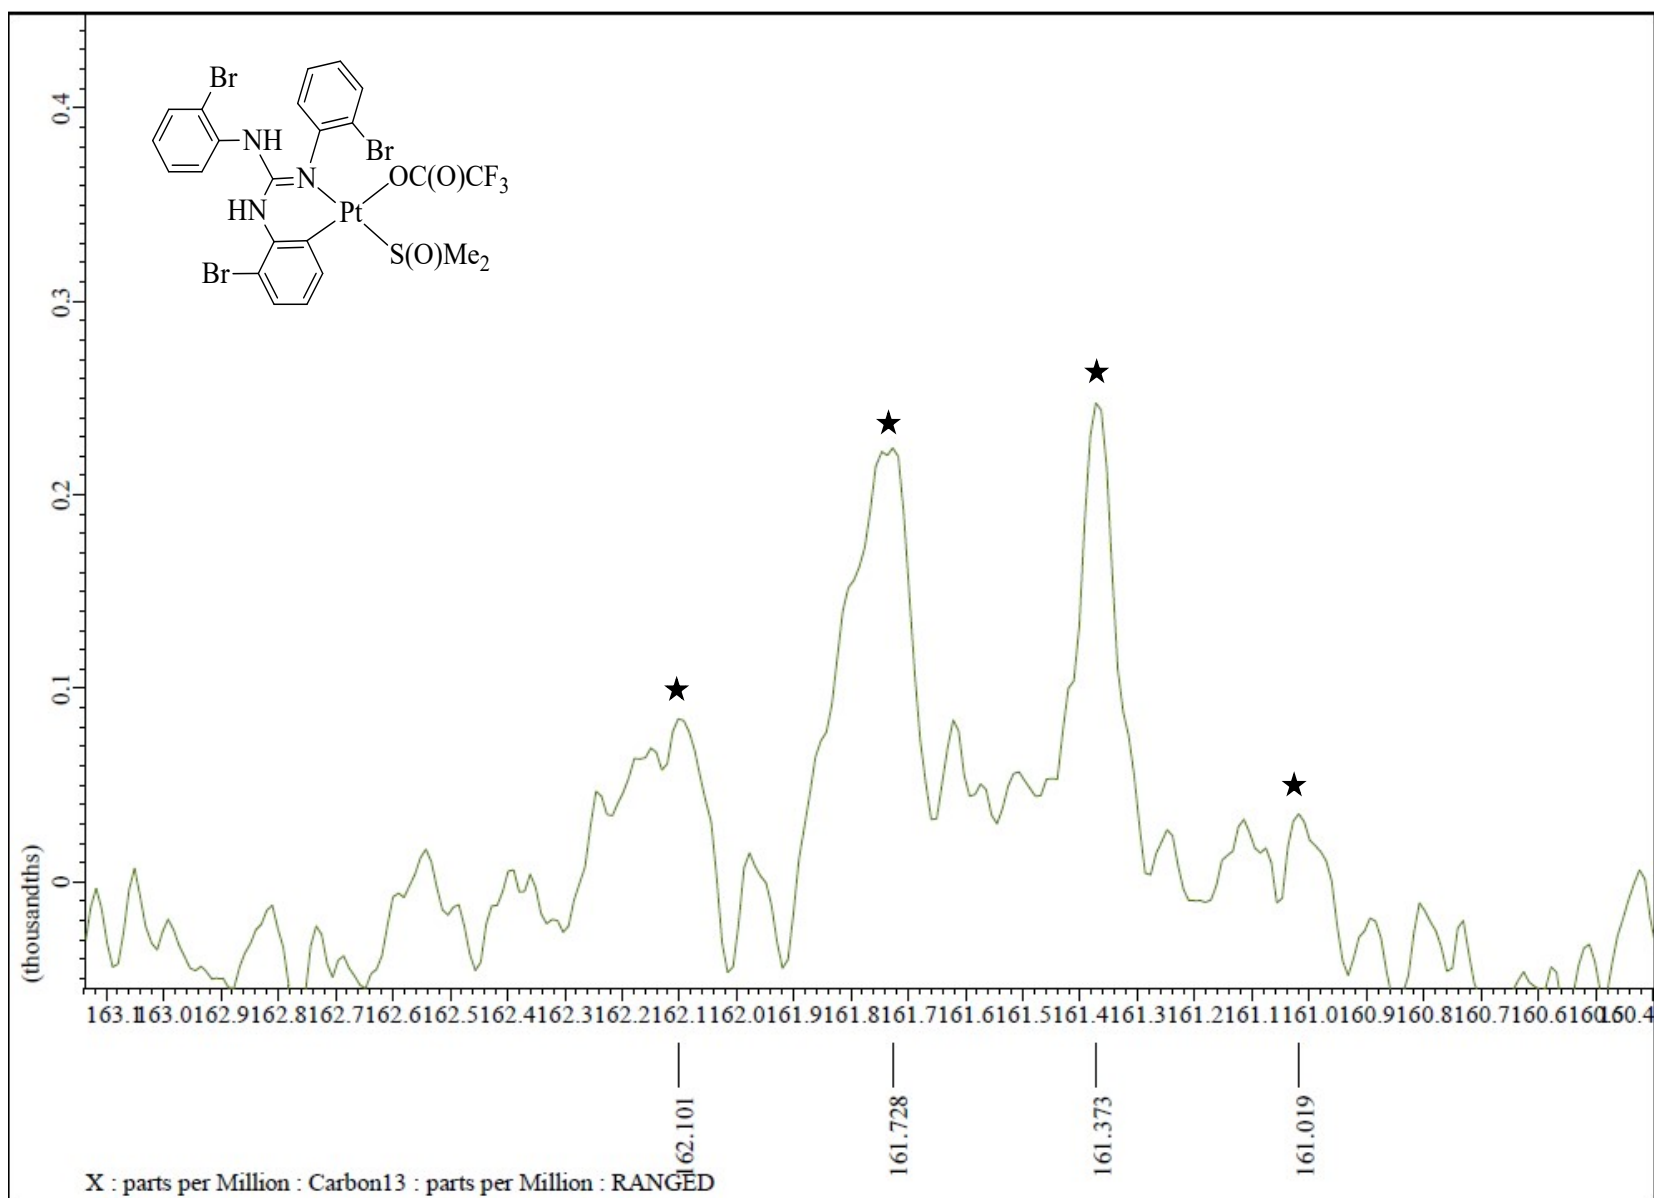

Fig. S49 <sup>13</sup>C NMR (CDCl<sub>3</sub>, 100.5 MHz) spectrum of **8** in the indicated region.

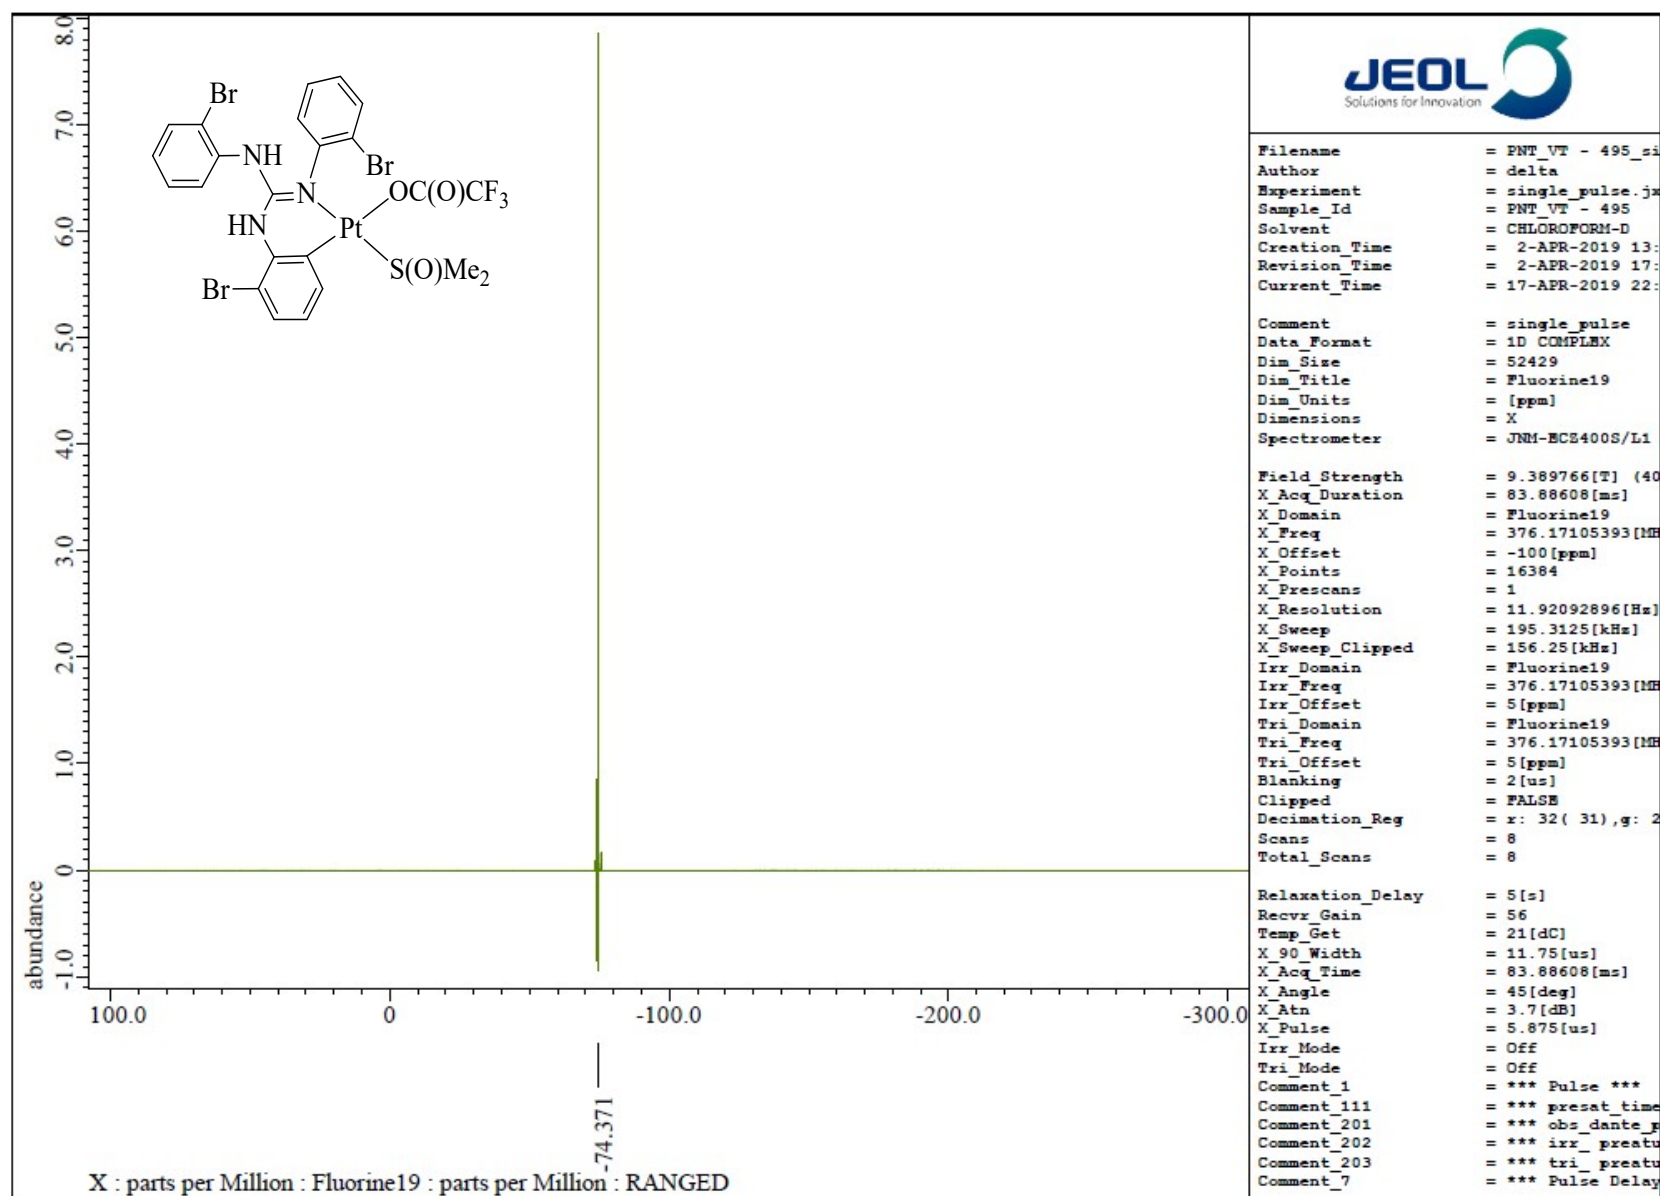

Fig. S50  $^{19}\text{F}\{^1\text{H}\}$  NMR ( $\text{CDCl}_3$ , 376.31 MHz) spectrum of **8**.

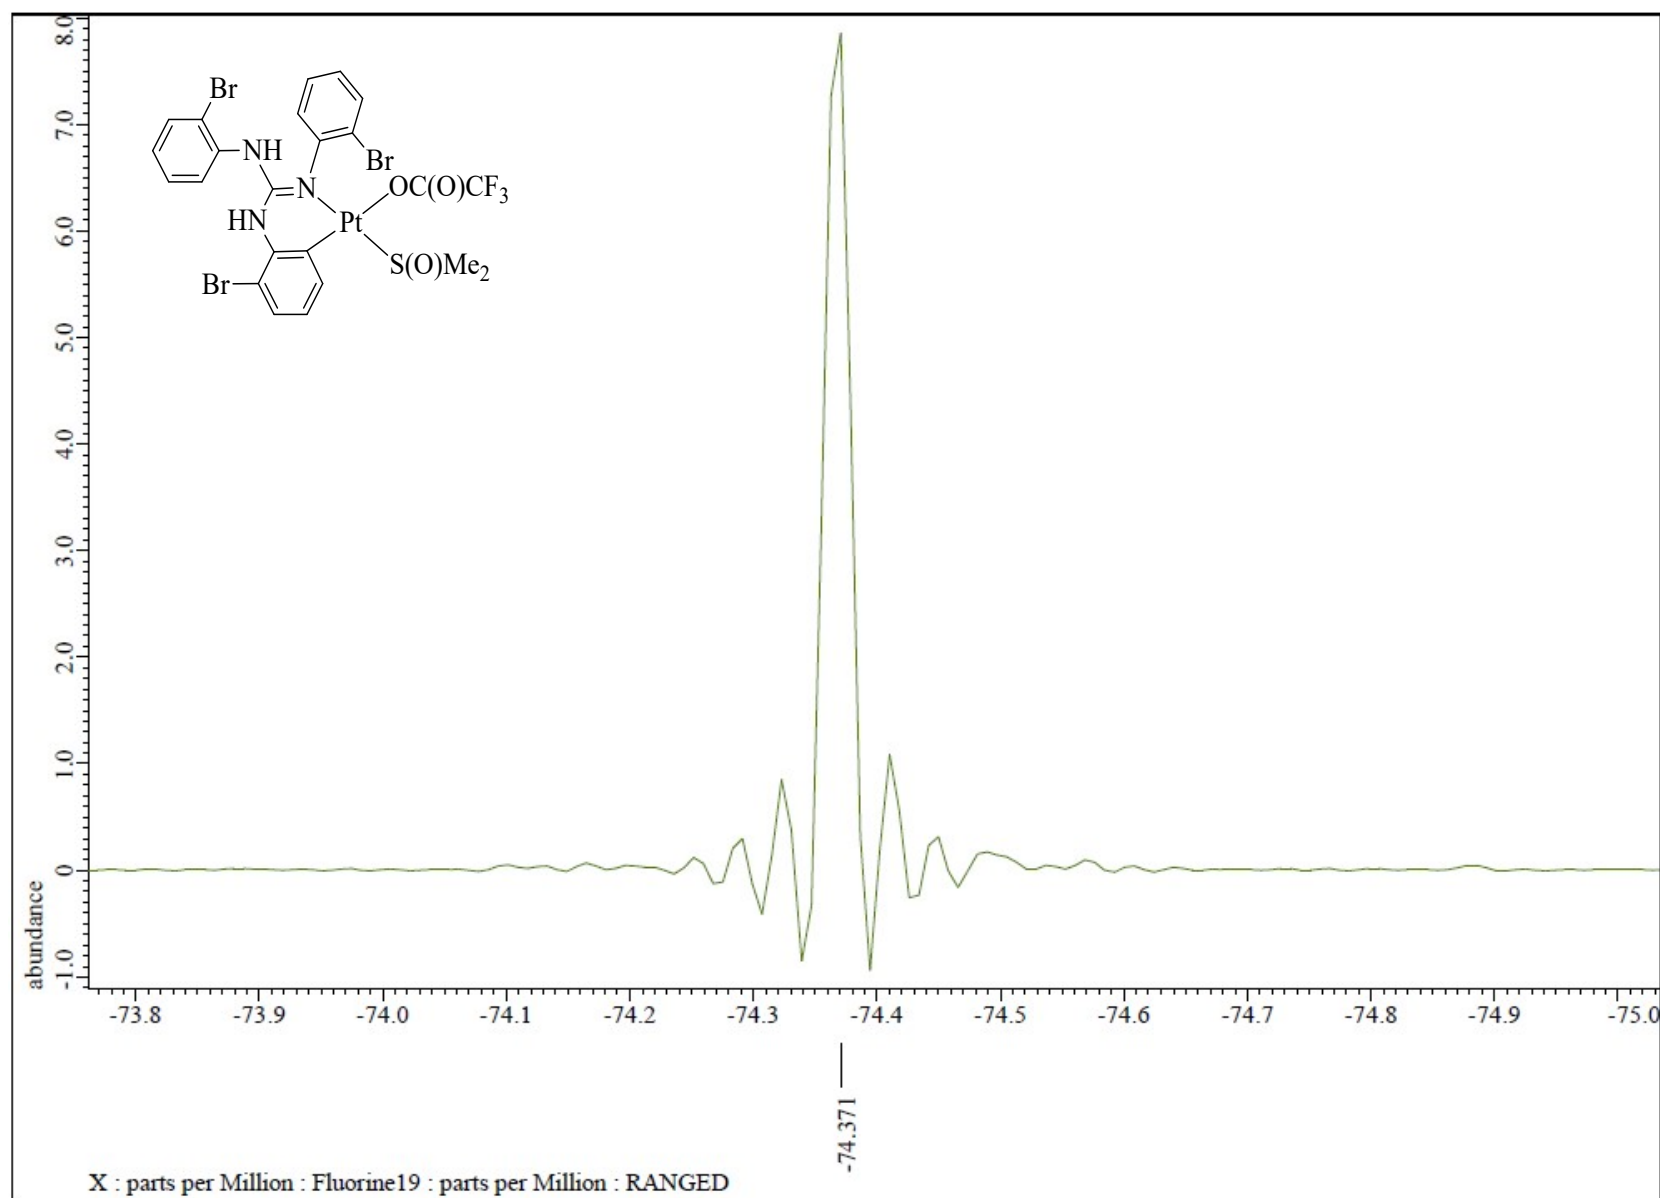

Fig. S51  $^{19}\text{F}$   $\{^1\text{H}\}$  NMR ( $\text{CDCl}_3$ , 376.31 MHz) spectrum of **8** in the indicated region.

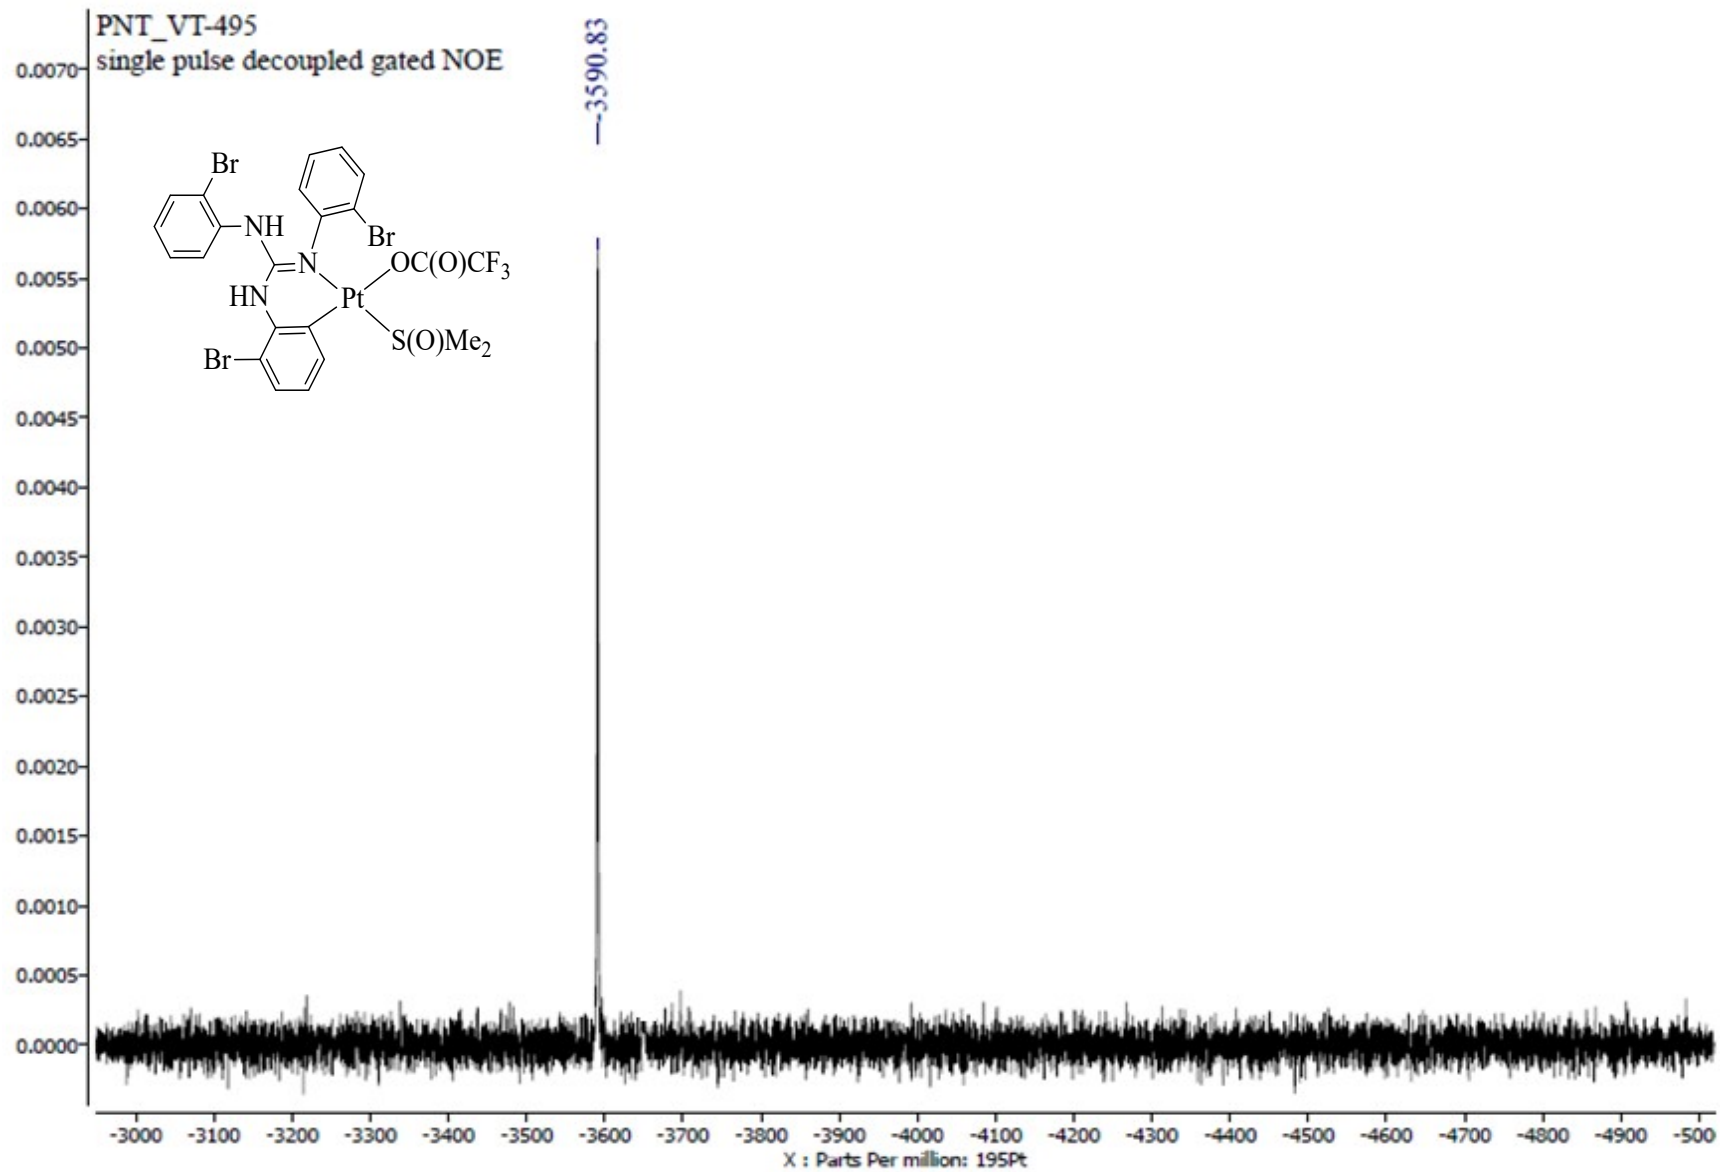

Fig. S52  $^{195}\text{Pt}\{^1\text{H}\}$  NMR ( $\text{CDCl}_3$ , 85.8 MHz) spectrum of **8**.

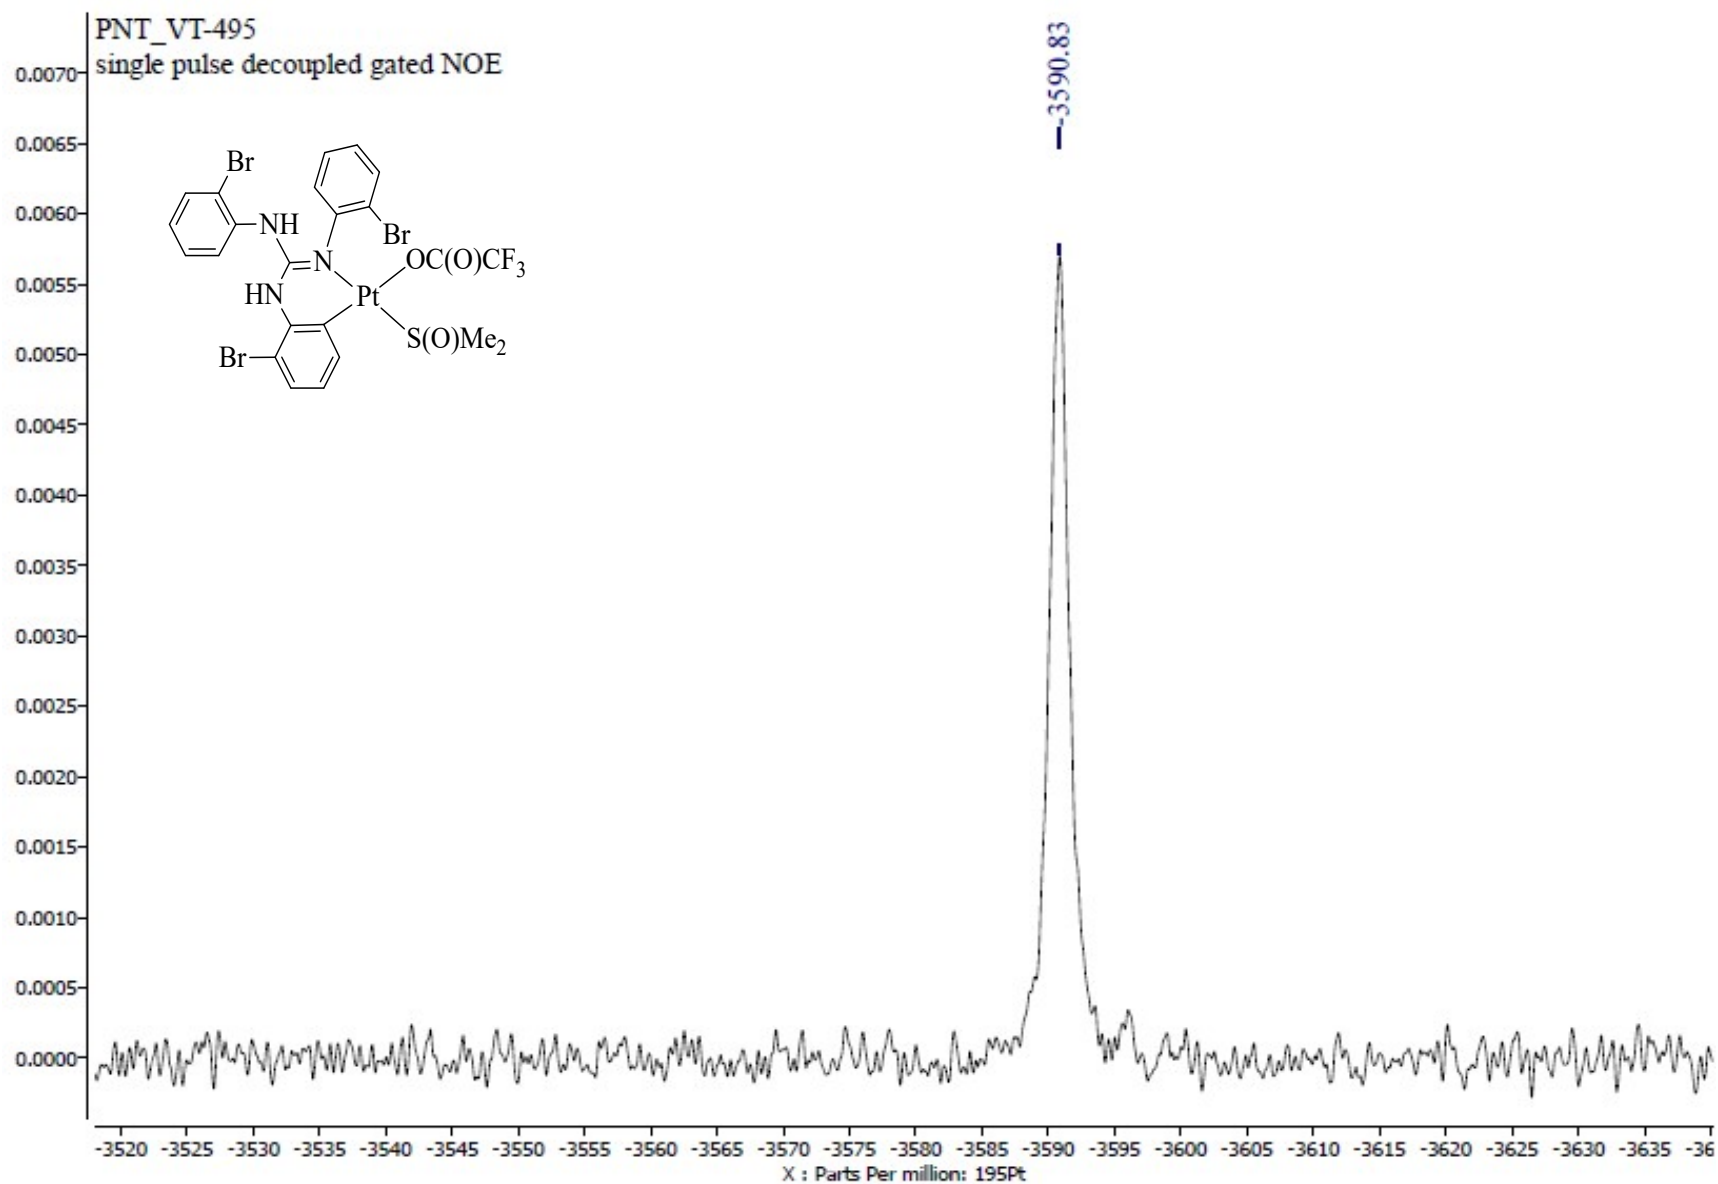

**Fig. S53**  $^{195}\text{Pt}\{^1\text{H}\}$  NMR ( $\text{CDCl}_3$ , 85.8 MHz) spectrum of **8** in the indicated region.

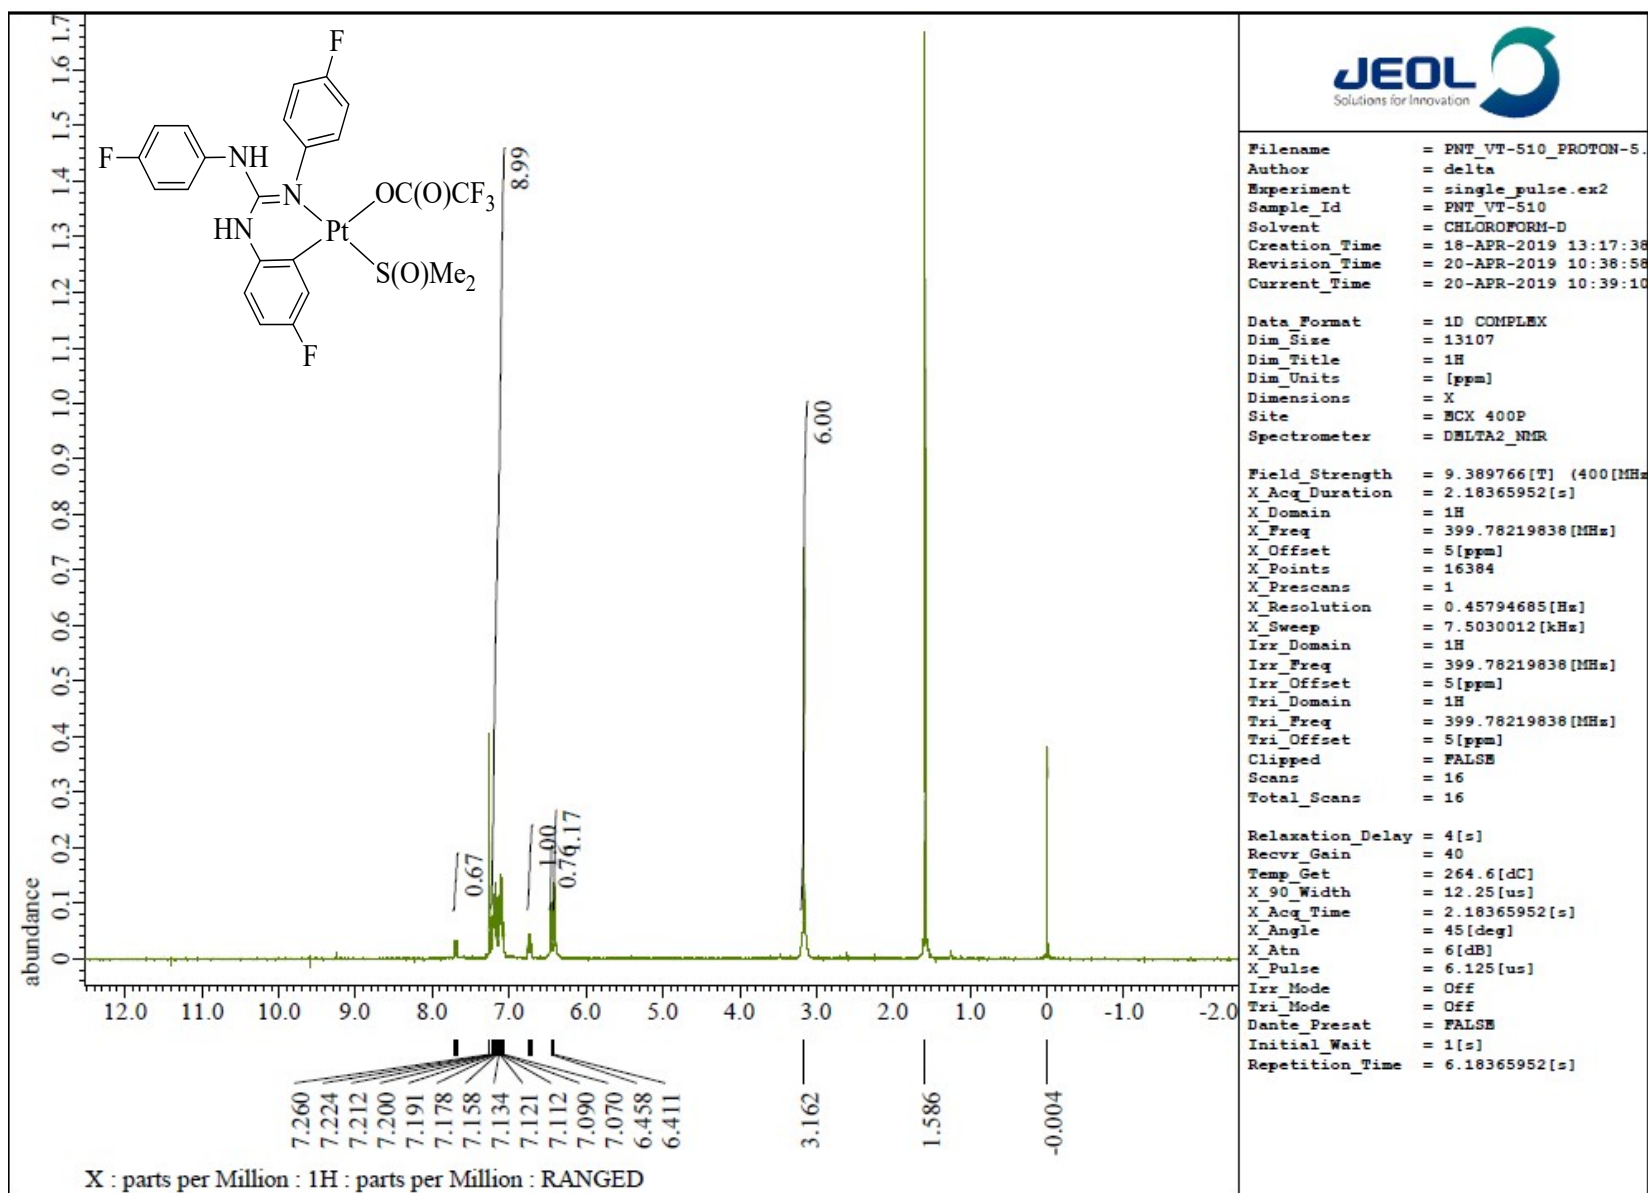

Fig. S54 <sup>1</sup>H NMR (CDCl<sub>3</sub>, 400 MHz) spectrum of 9.



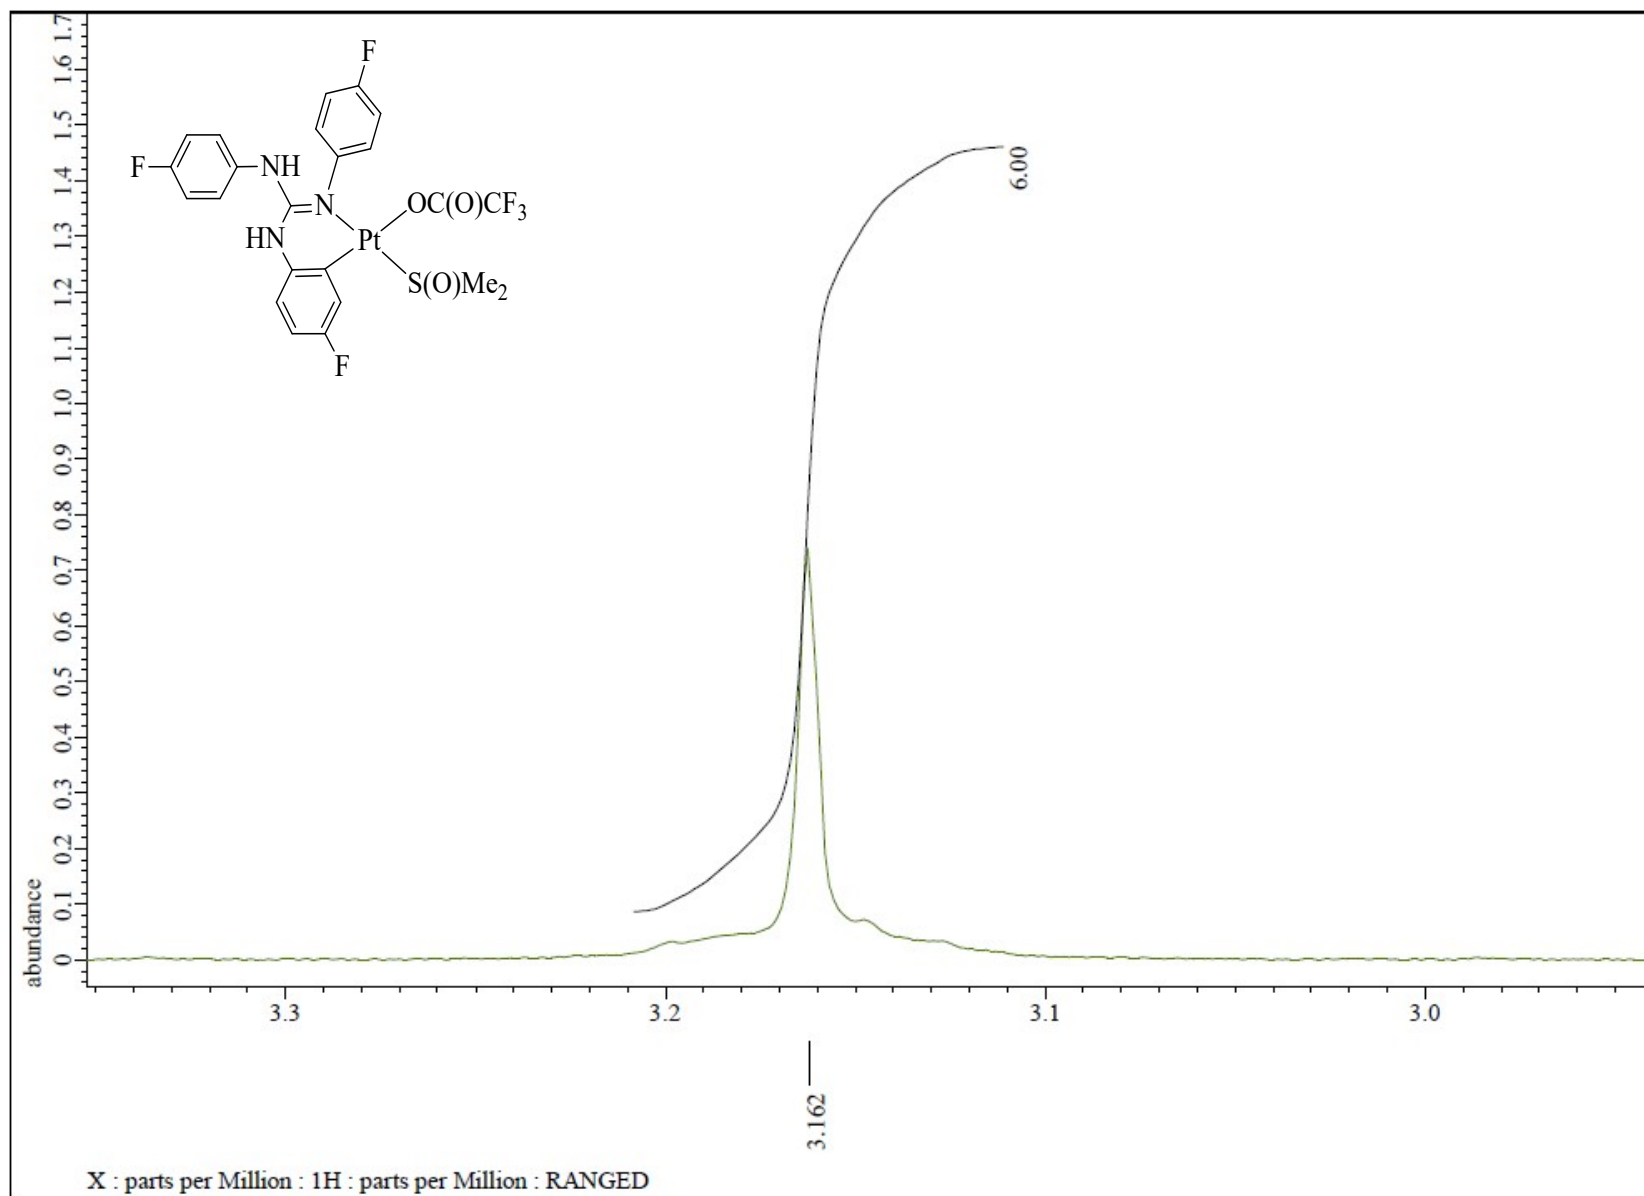

Fig. S55  $^1\text{H}$  NMR ( $\text{CDCl}_3$ , 400 MHz) spectrum of **9** in the indicated region.

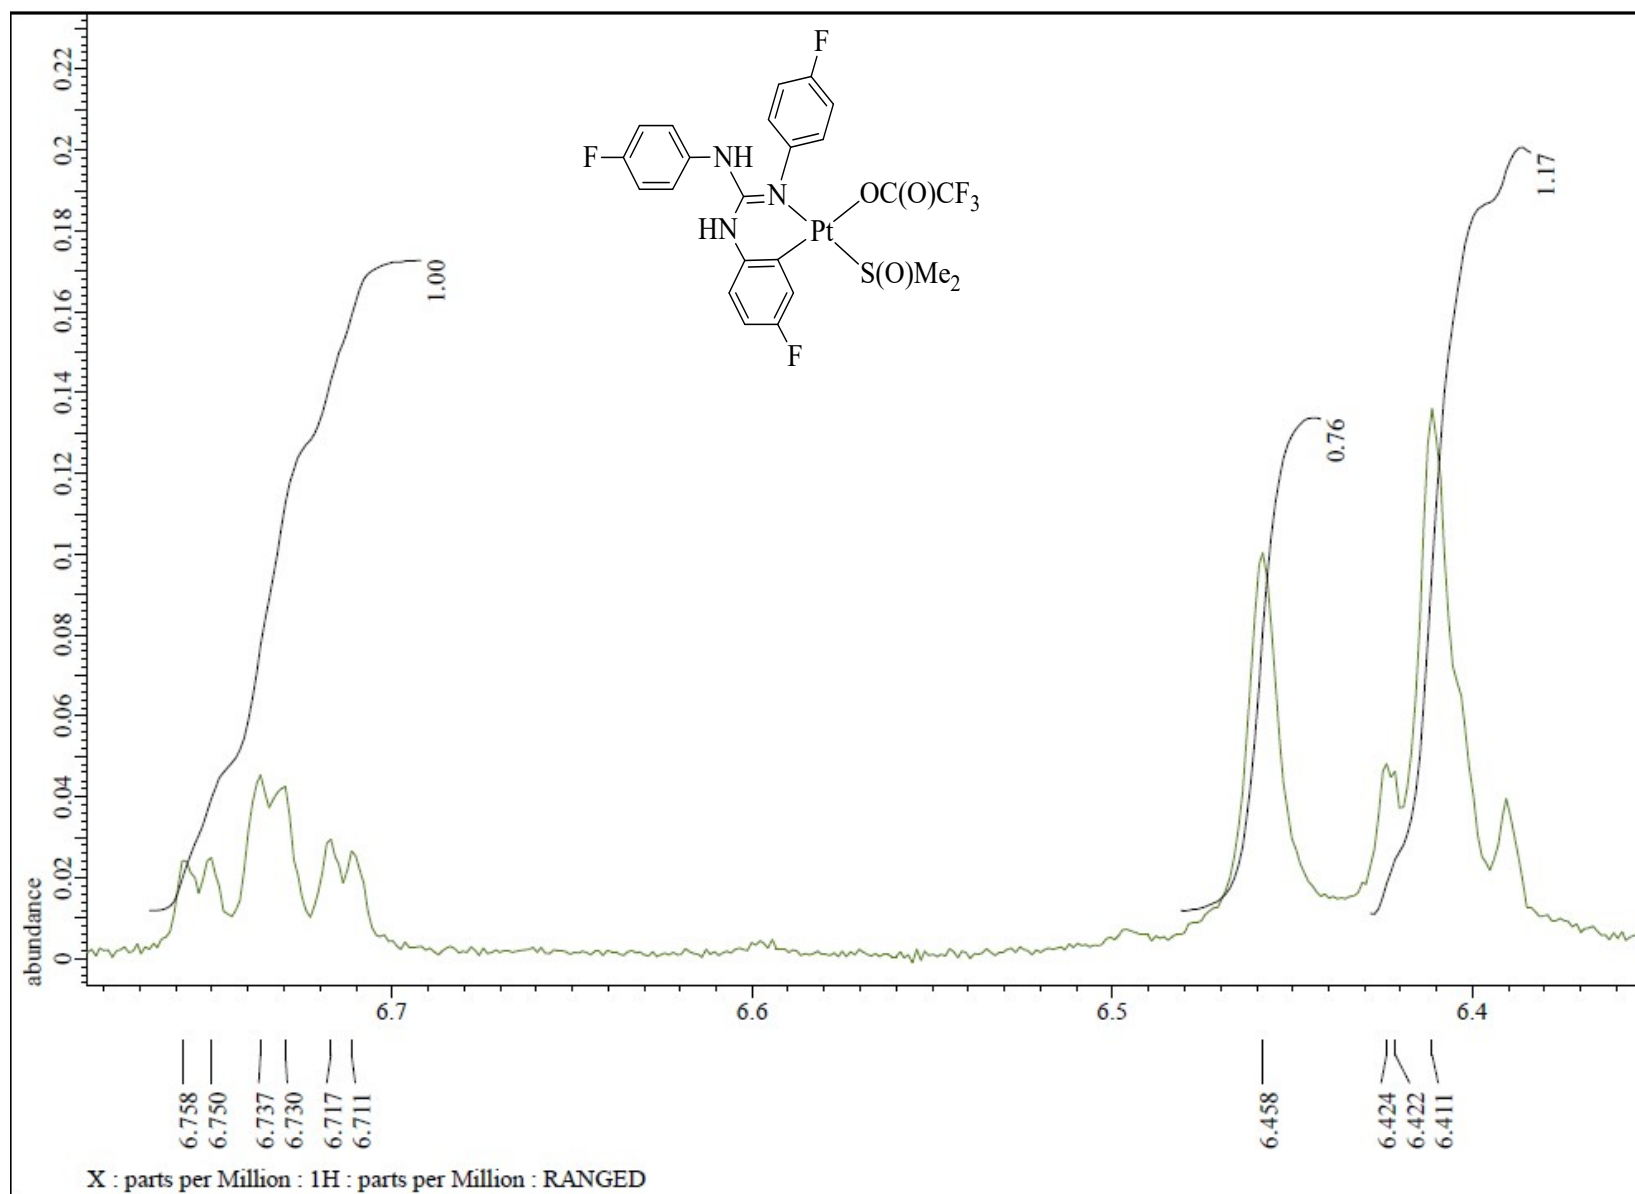

**Fig. S56** <sup>1</sup>H NMR (CDCl<sub>3</sub>, 400 MHz) spectrum of **9** in the indicated region.

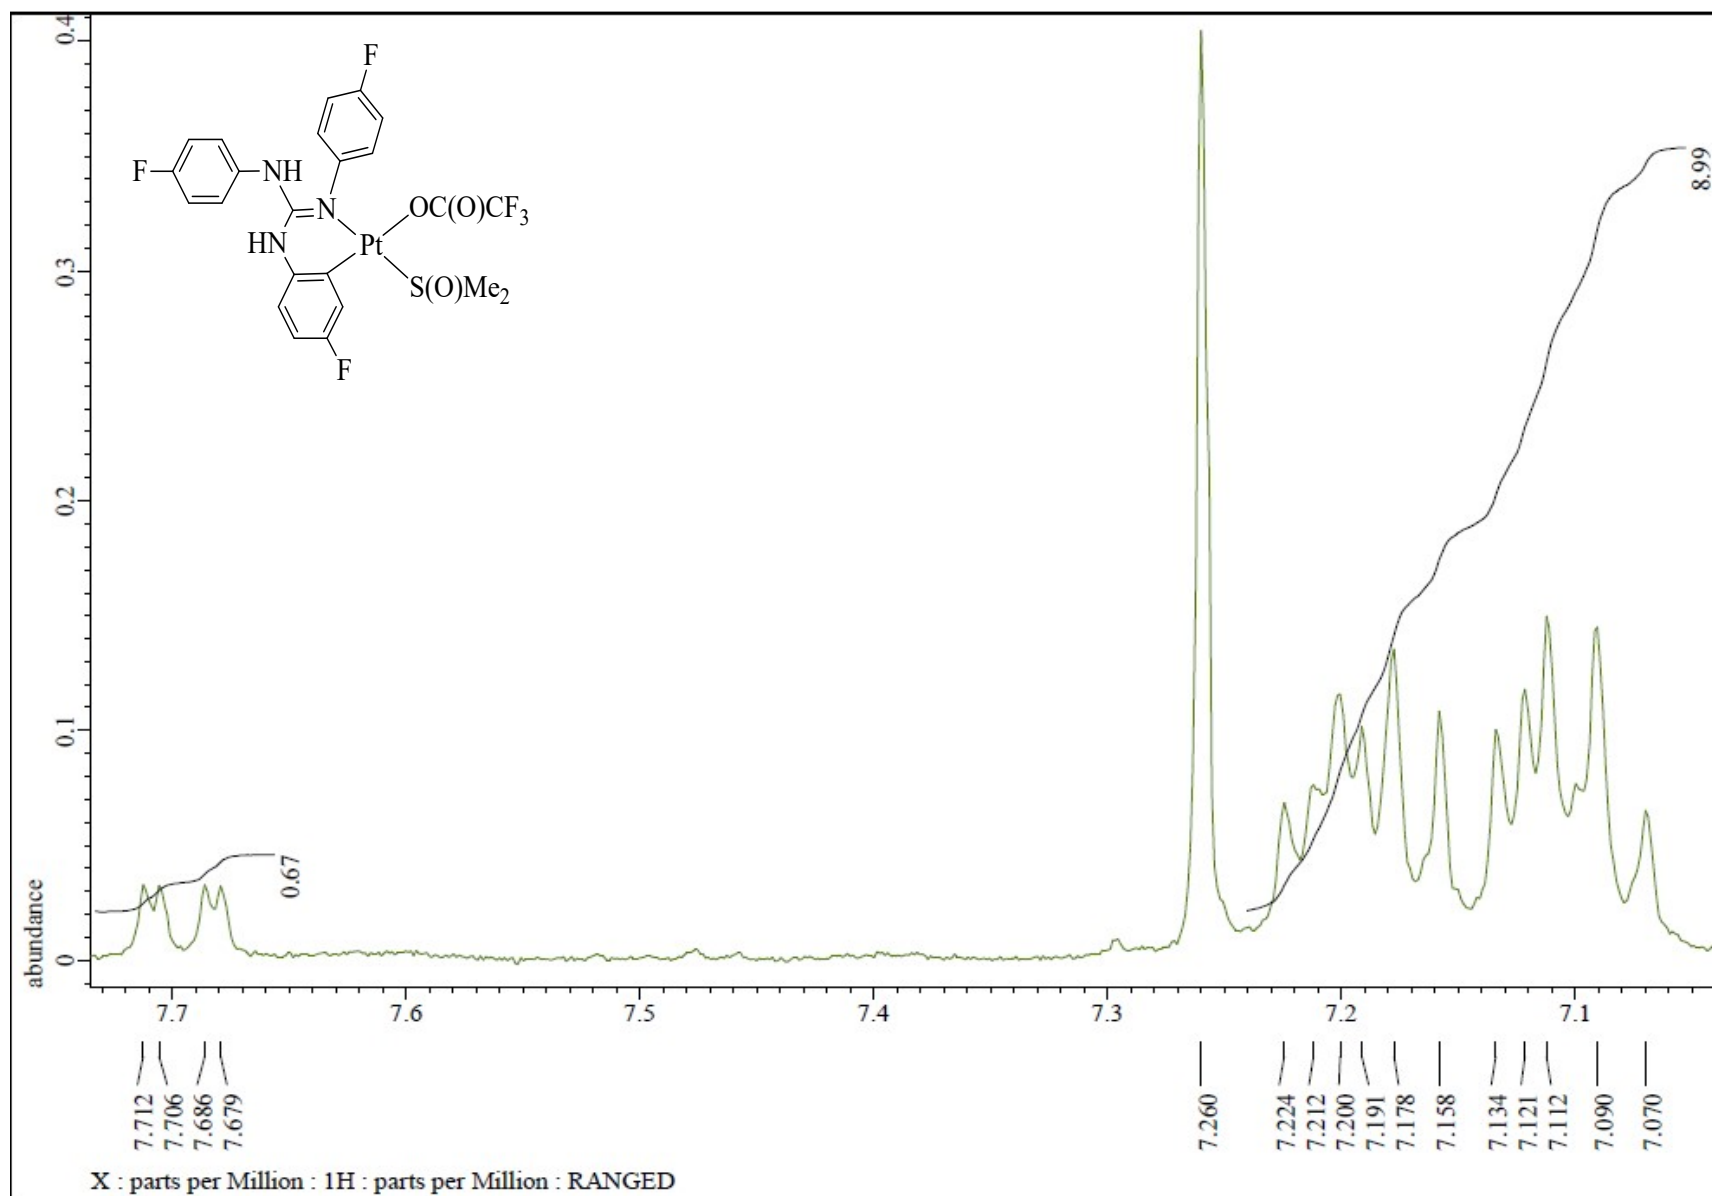

Fig. S57 <sup>1</sup>H NMR (CDCl<sub>3</sub>, 400 MHz) spectrum of **9** in the indicated region.

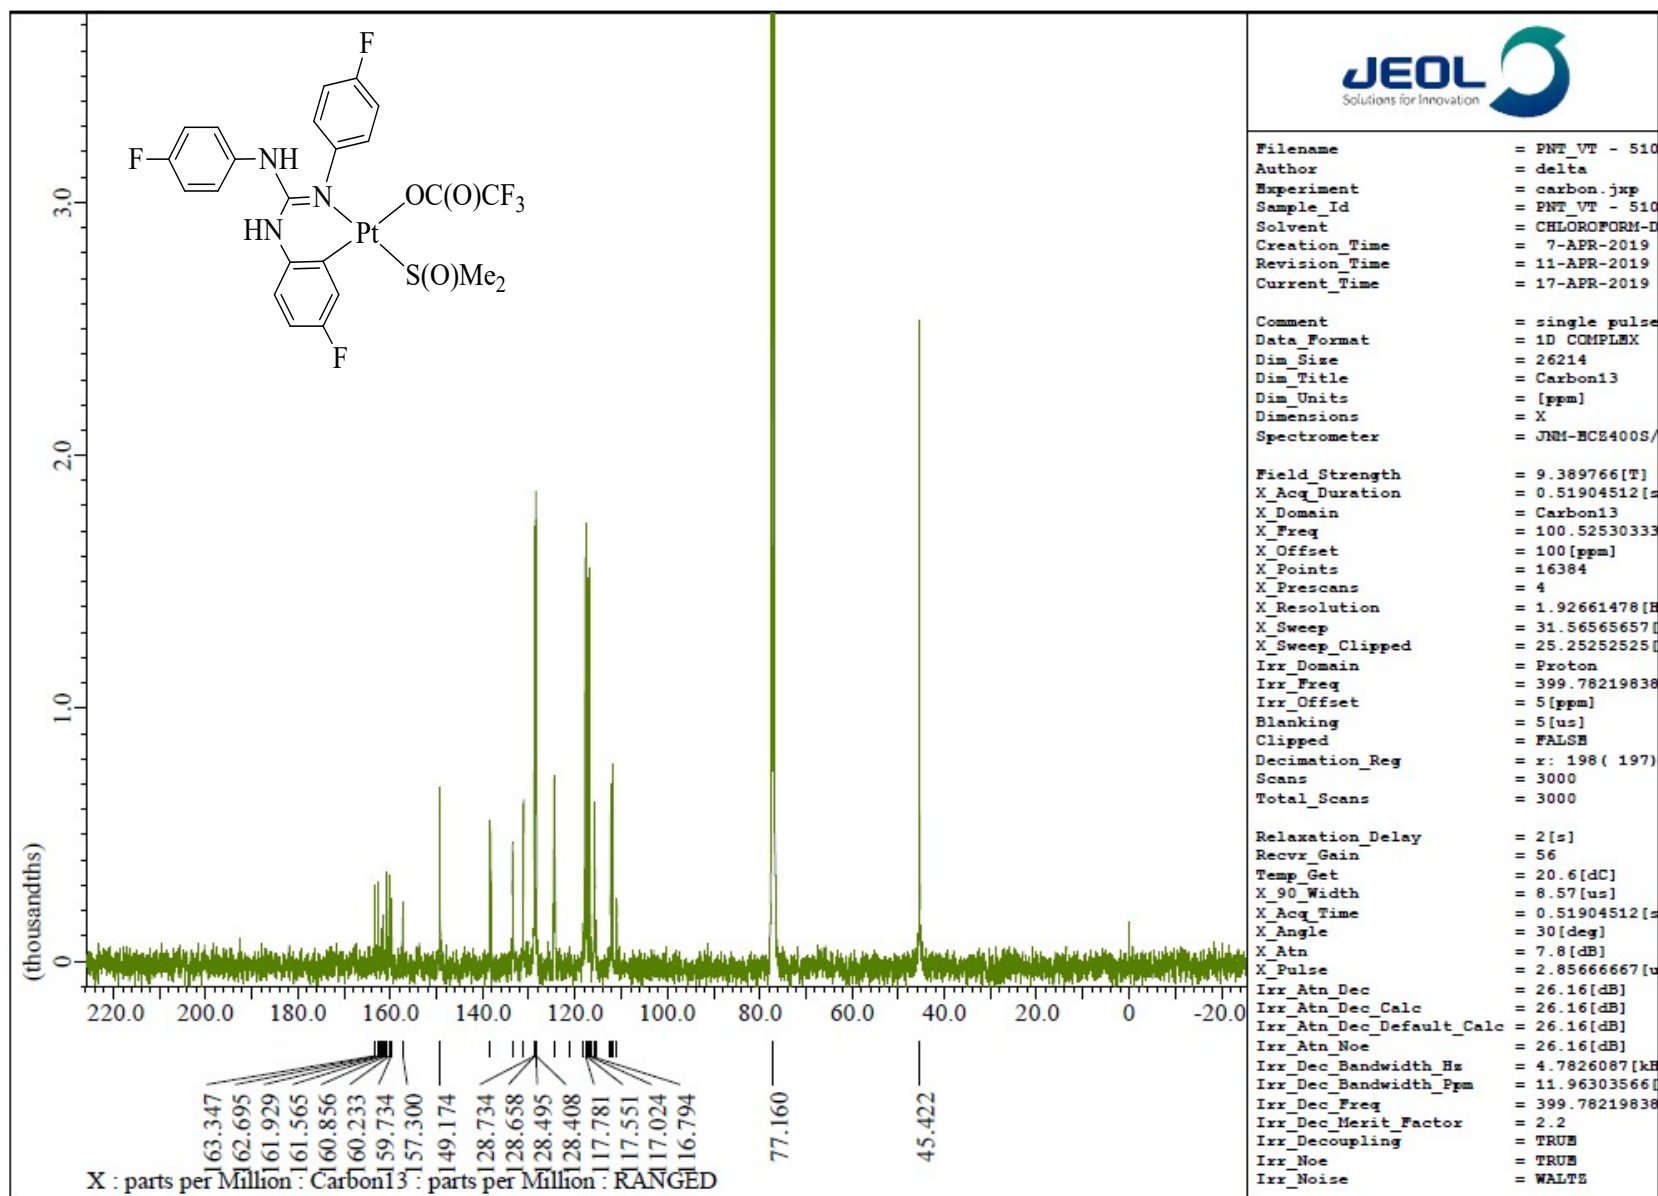

Fig. S58  $^{13}\text{C}\{^1\text{H}\}$  NMR ( $\text{CDCl}_3$ , 100.5 MHz) spectrum of **9**.

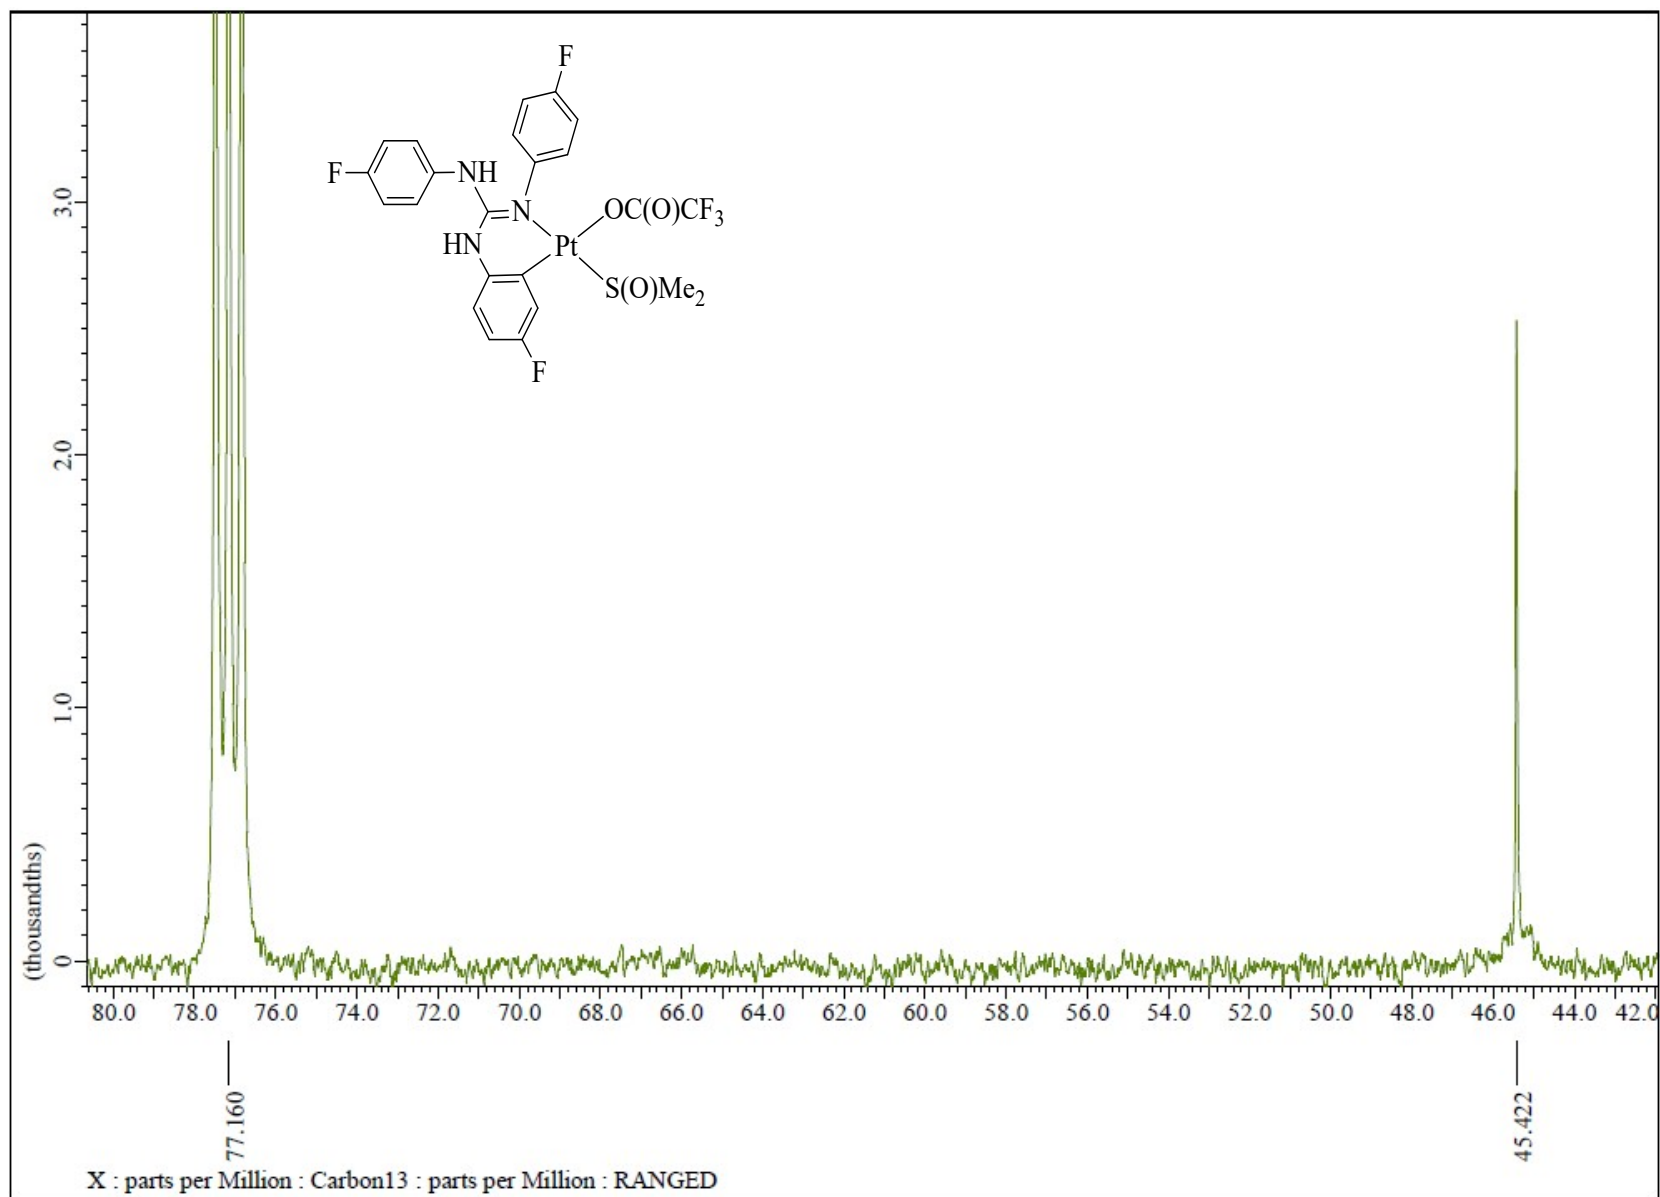

Fig. S59  $^{13}\text{C}\{^1\text{H}\}$  NMR ( $\text{CDCl}_3$ , 100.5 MHz) spectrum of **9** in the indicated region.

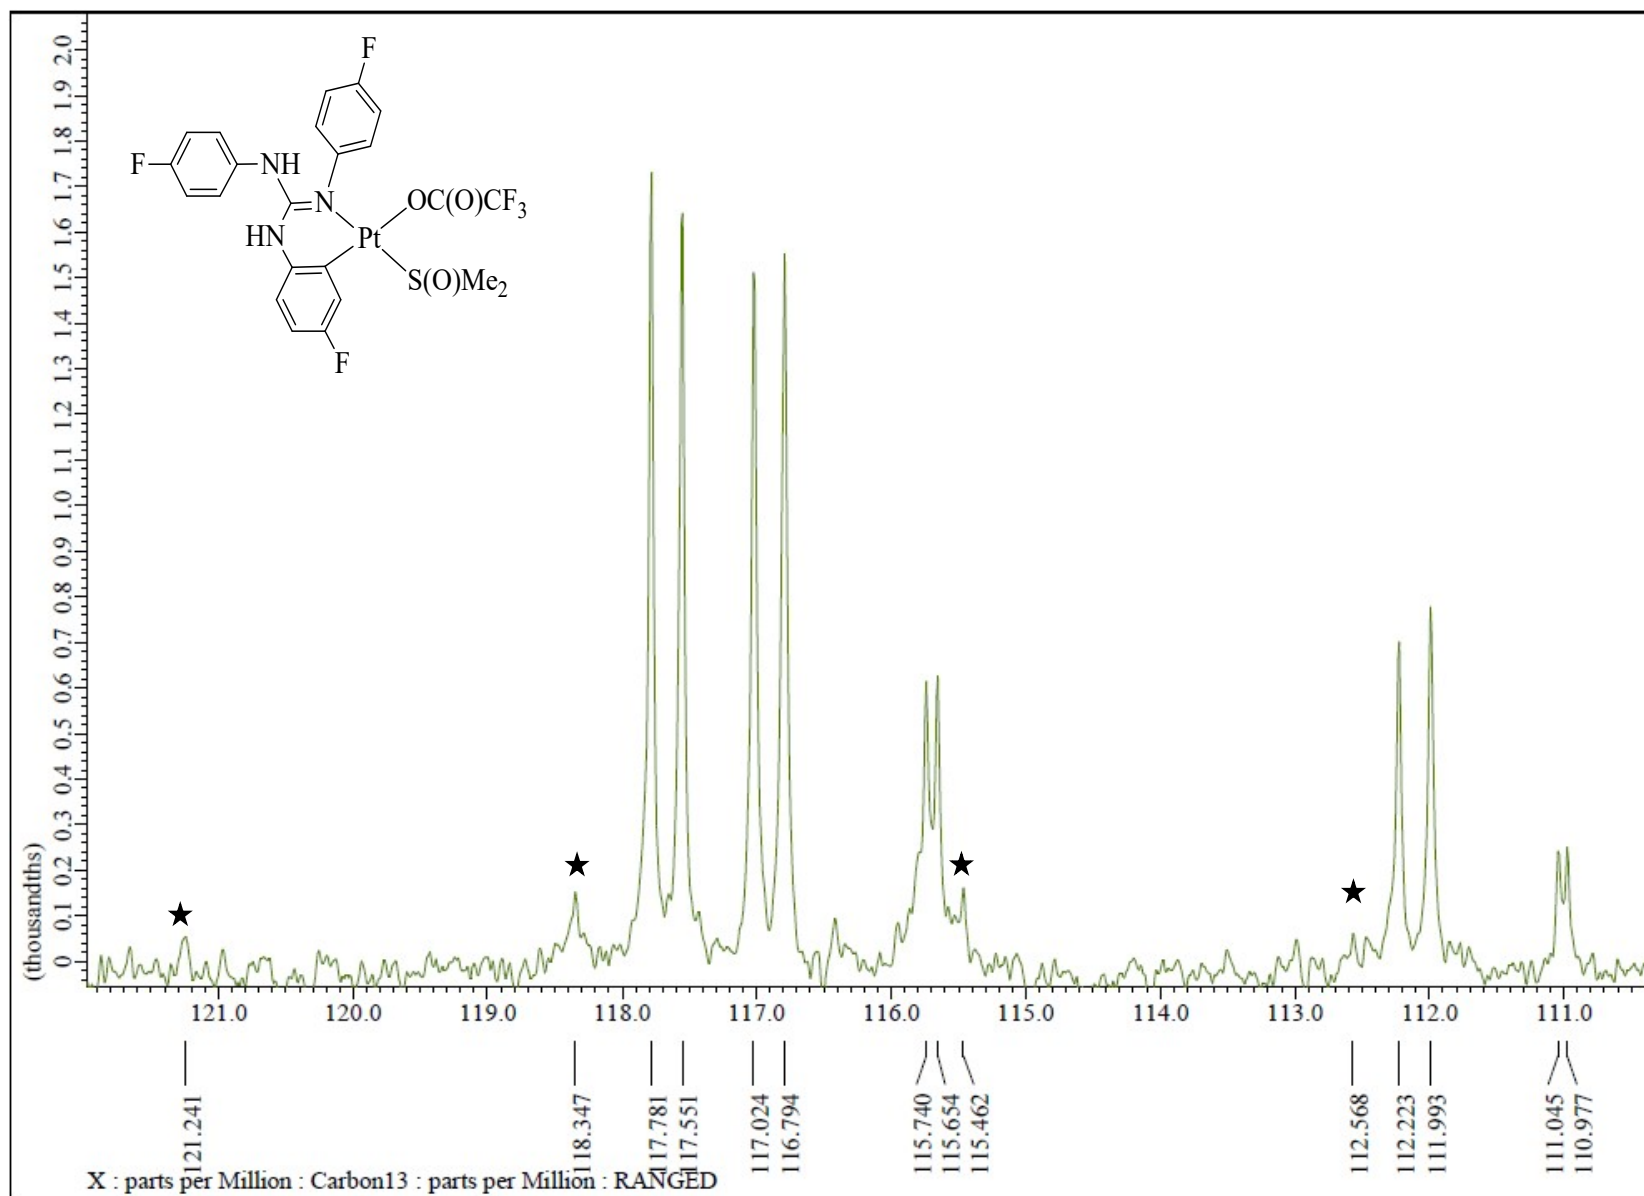

Fig. S60  $^{13}\text{C}\{^1\text{H}\}$  NMR ( $\text{CDCl}_3$ , 100.5 MHz) spectrum of **9** in the indicated region.

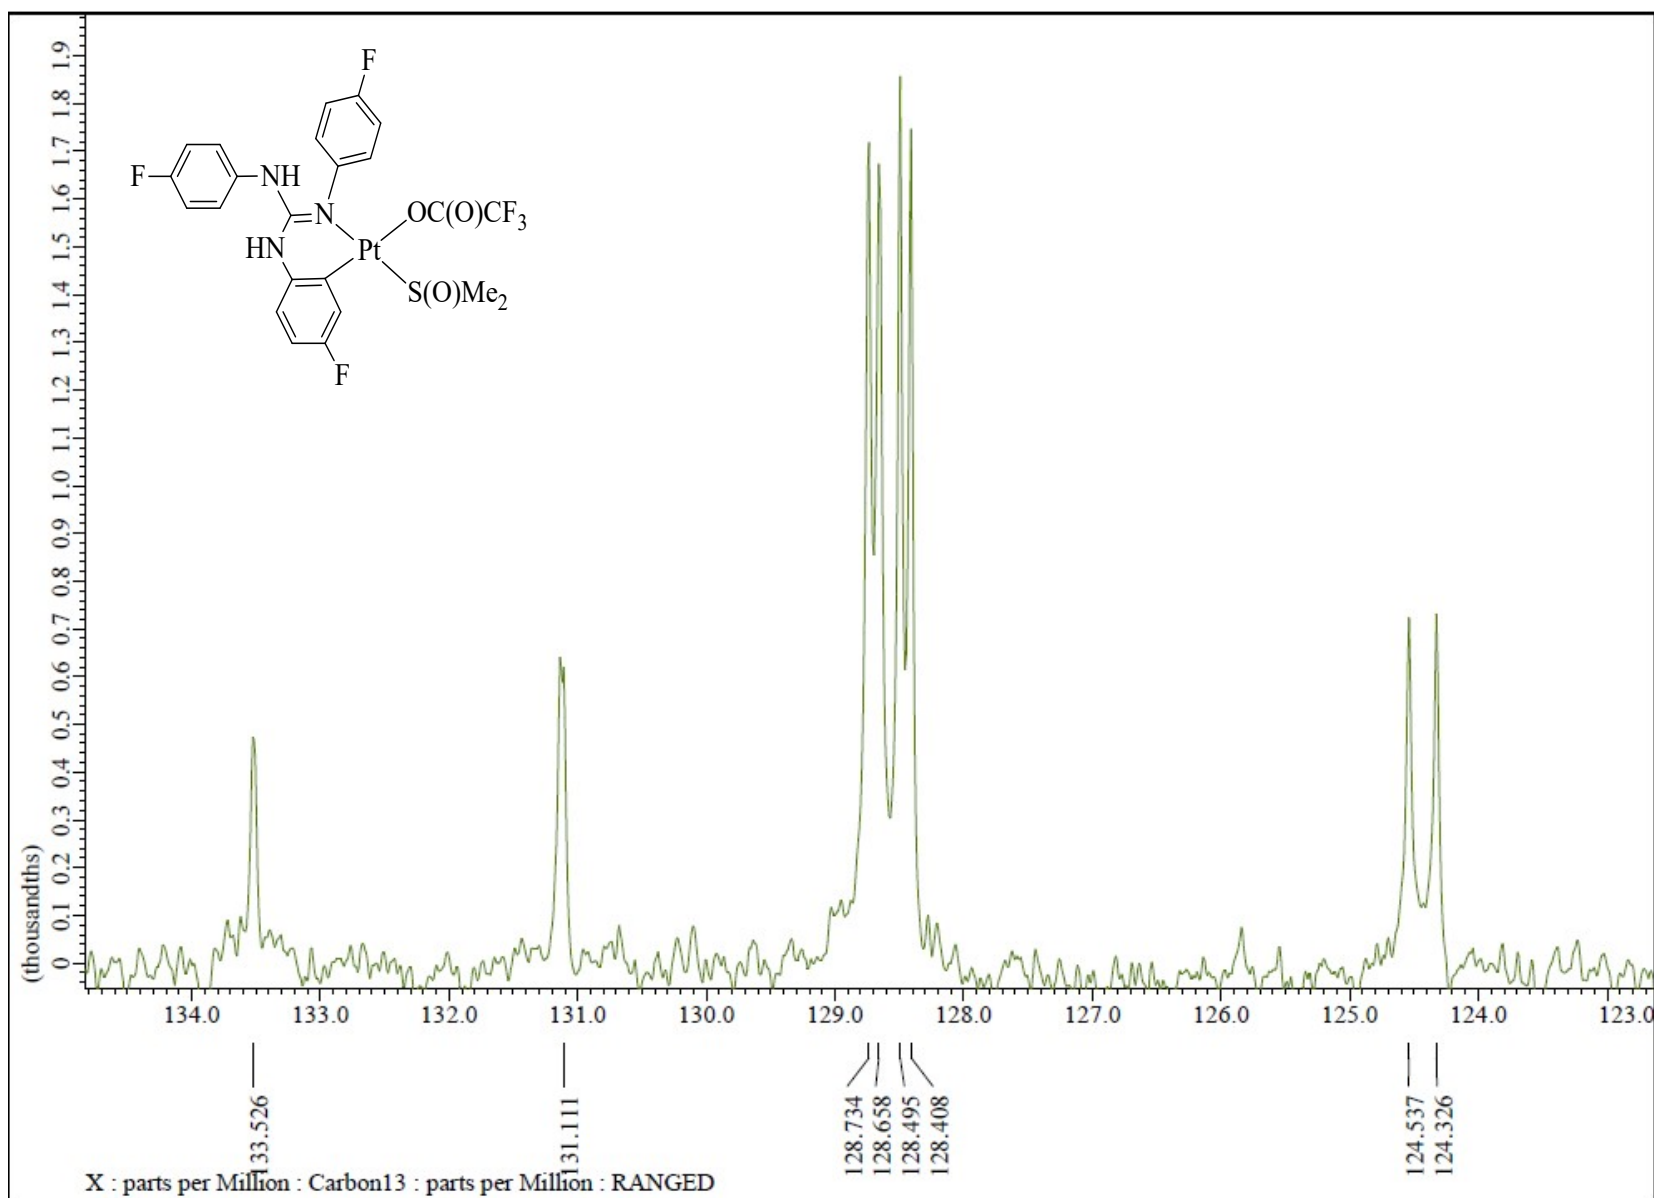

**Fig. S61** <sup>13</sup>C {<sup>1</sup>H} NMR (CDCl<sub>3</sub>, 100.5 MHz) spectrum of **9** in the indicated region.

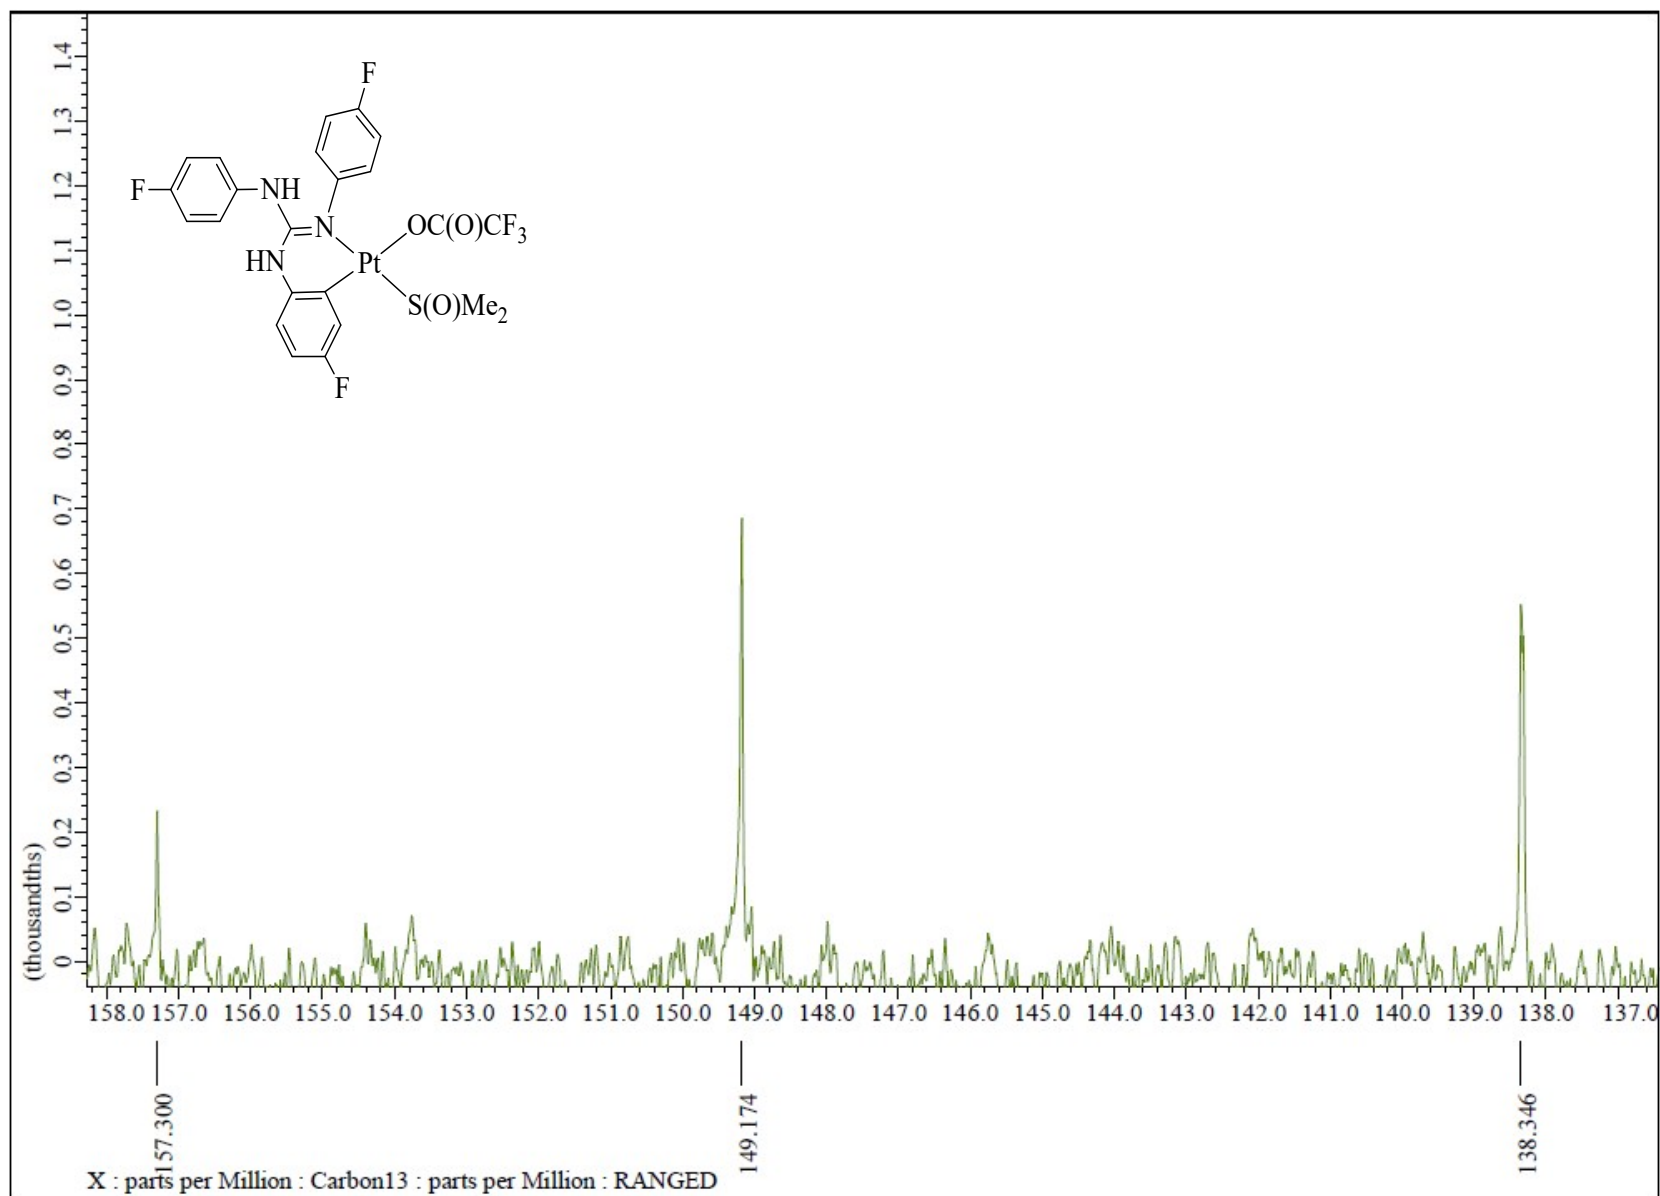

Fig. S62  $^{13}\text{C}\{^1\text{H}\}$  NMR ( $\text{CDCl}_3$ , 100.5 MHz) spectrum of **9** in the indicated region.



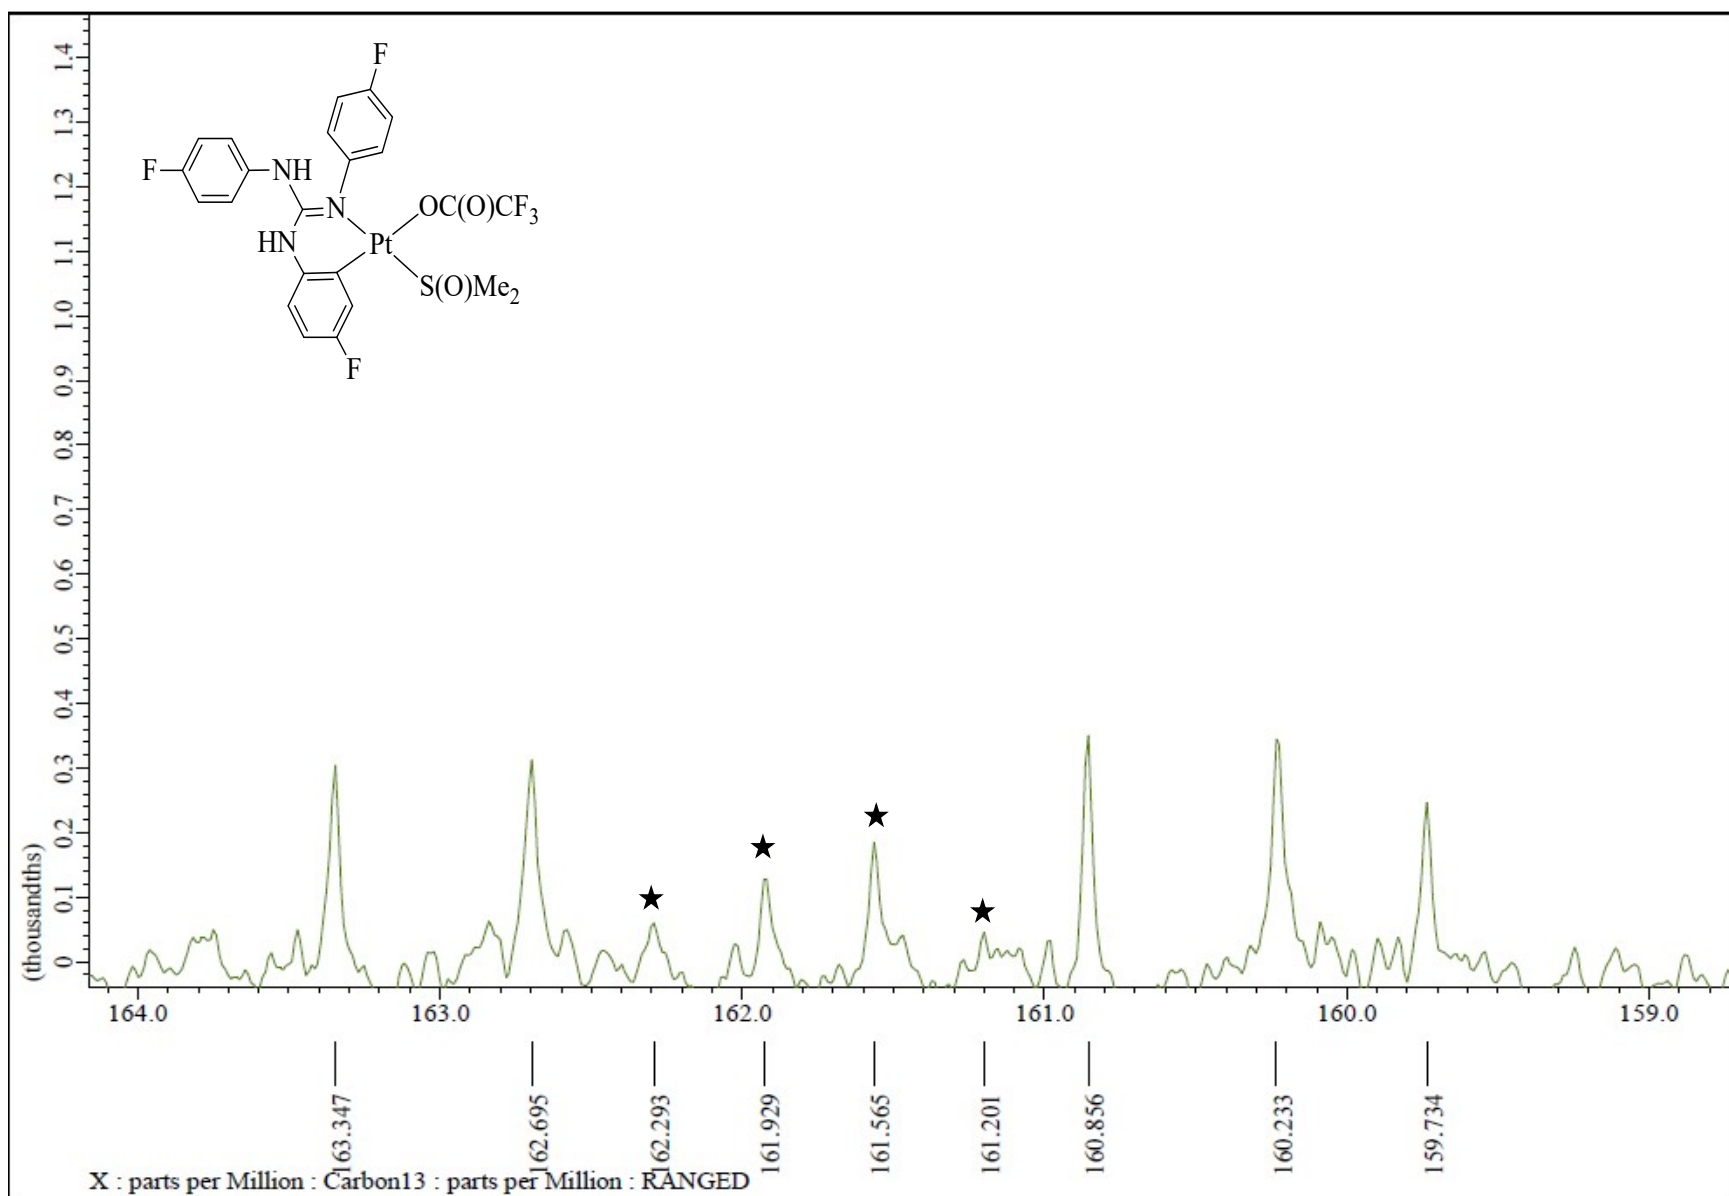

Fig. S63  $^{13}\text{C}\{^1\text{H}\}$  NMR ( $\text{CDCl}_3$ , 100.5 MHz) spectrum of **9** in the indicated region.

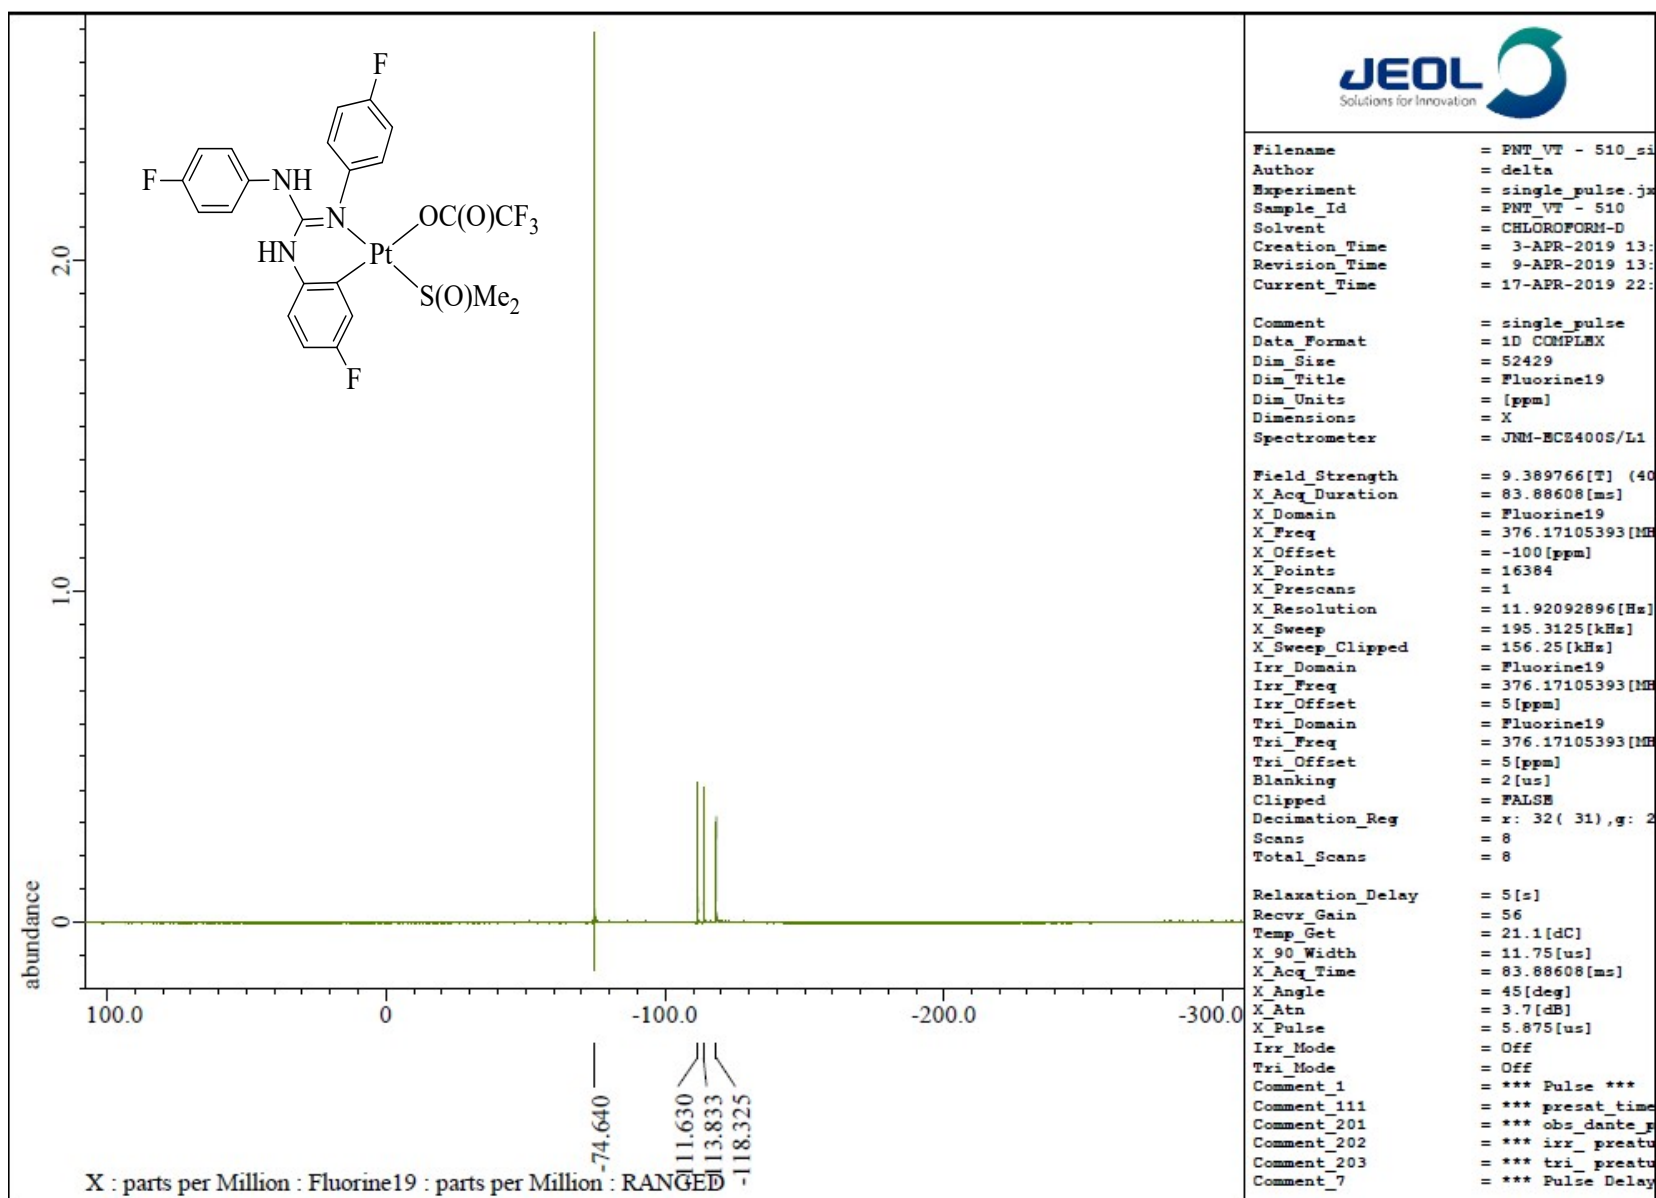

Fig. S64  $^{19}\text{F}\{^1\text{H}\}$  NMR ( $\text{CDCl}_3$ , 376.31 MHz) spectrum of 9.

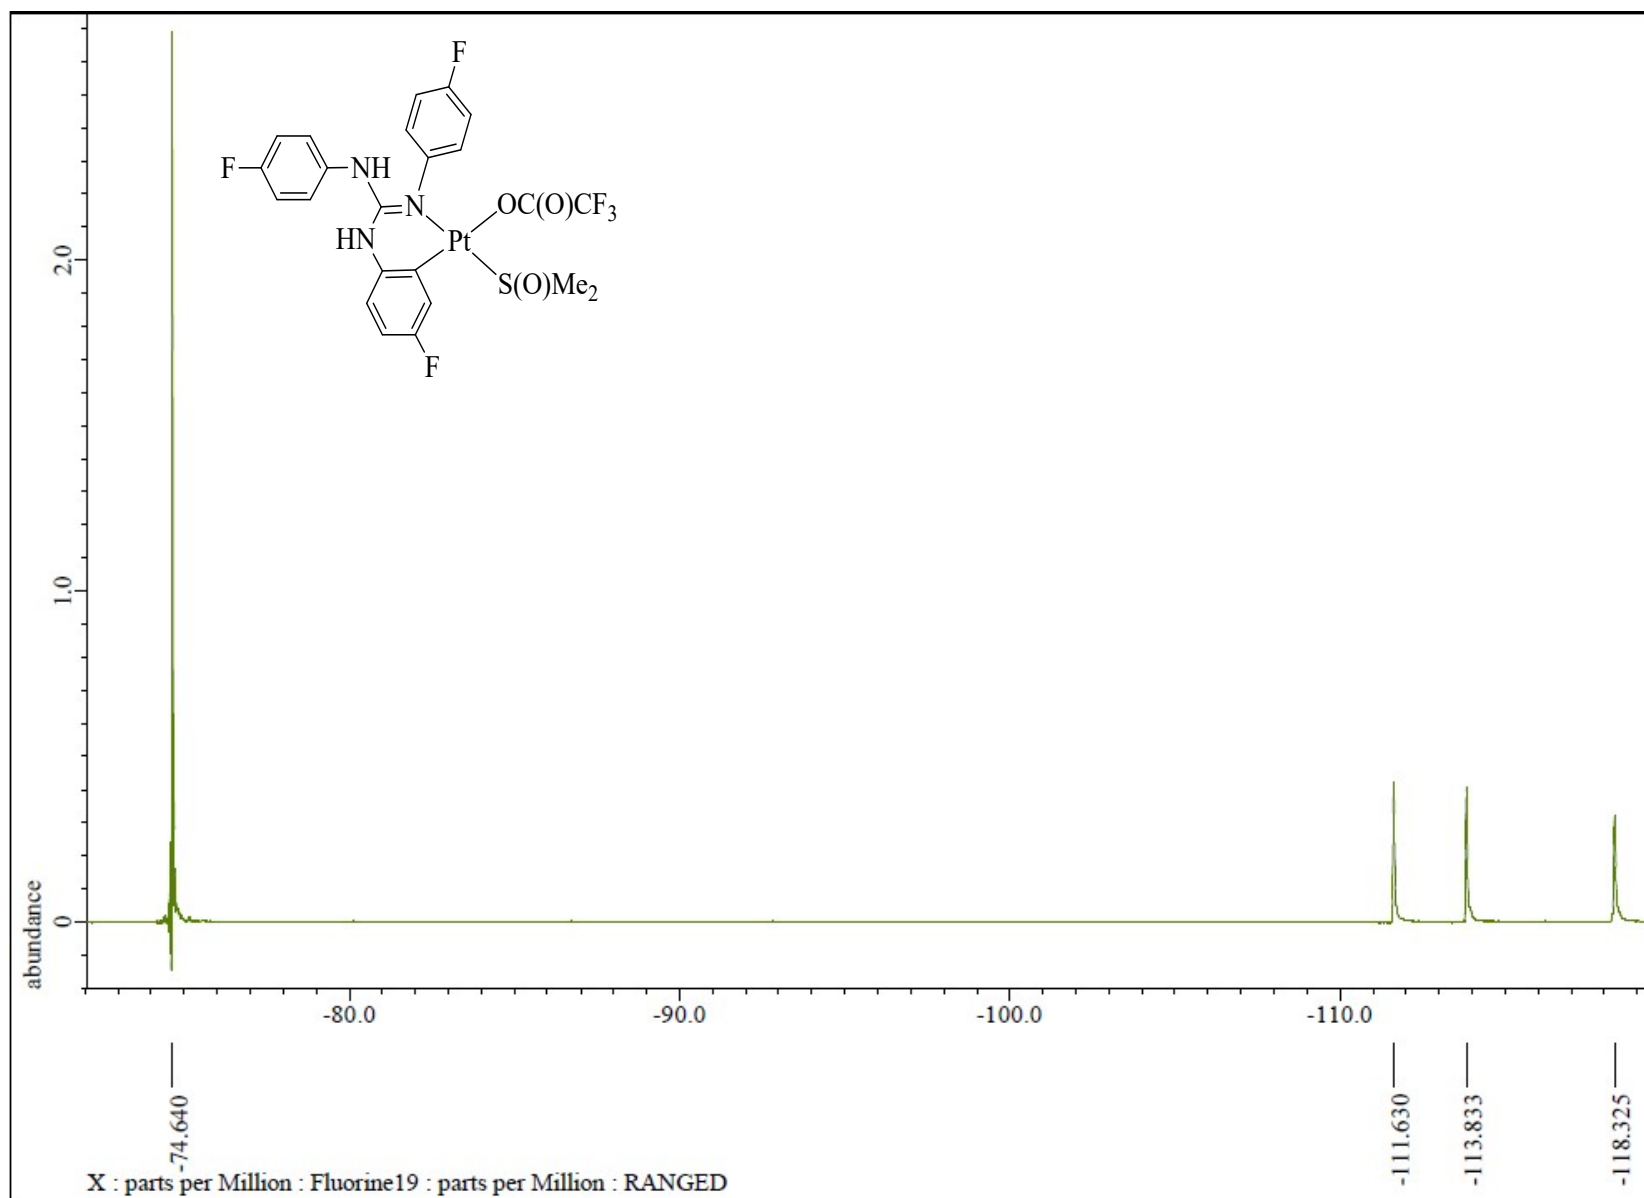

Fig. S65  $^{19}\text{F}$   $\{^1\text{H}\}$  NMR ( $\text{CDCl}_3$ , 376.31 MHz) spectrum of **9** in the indicated region.

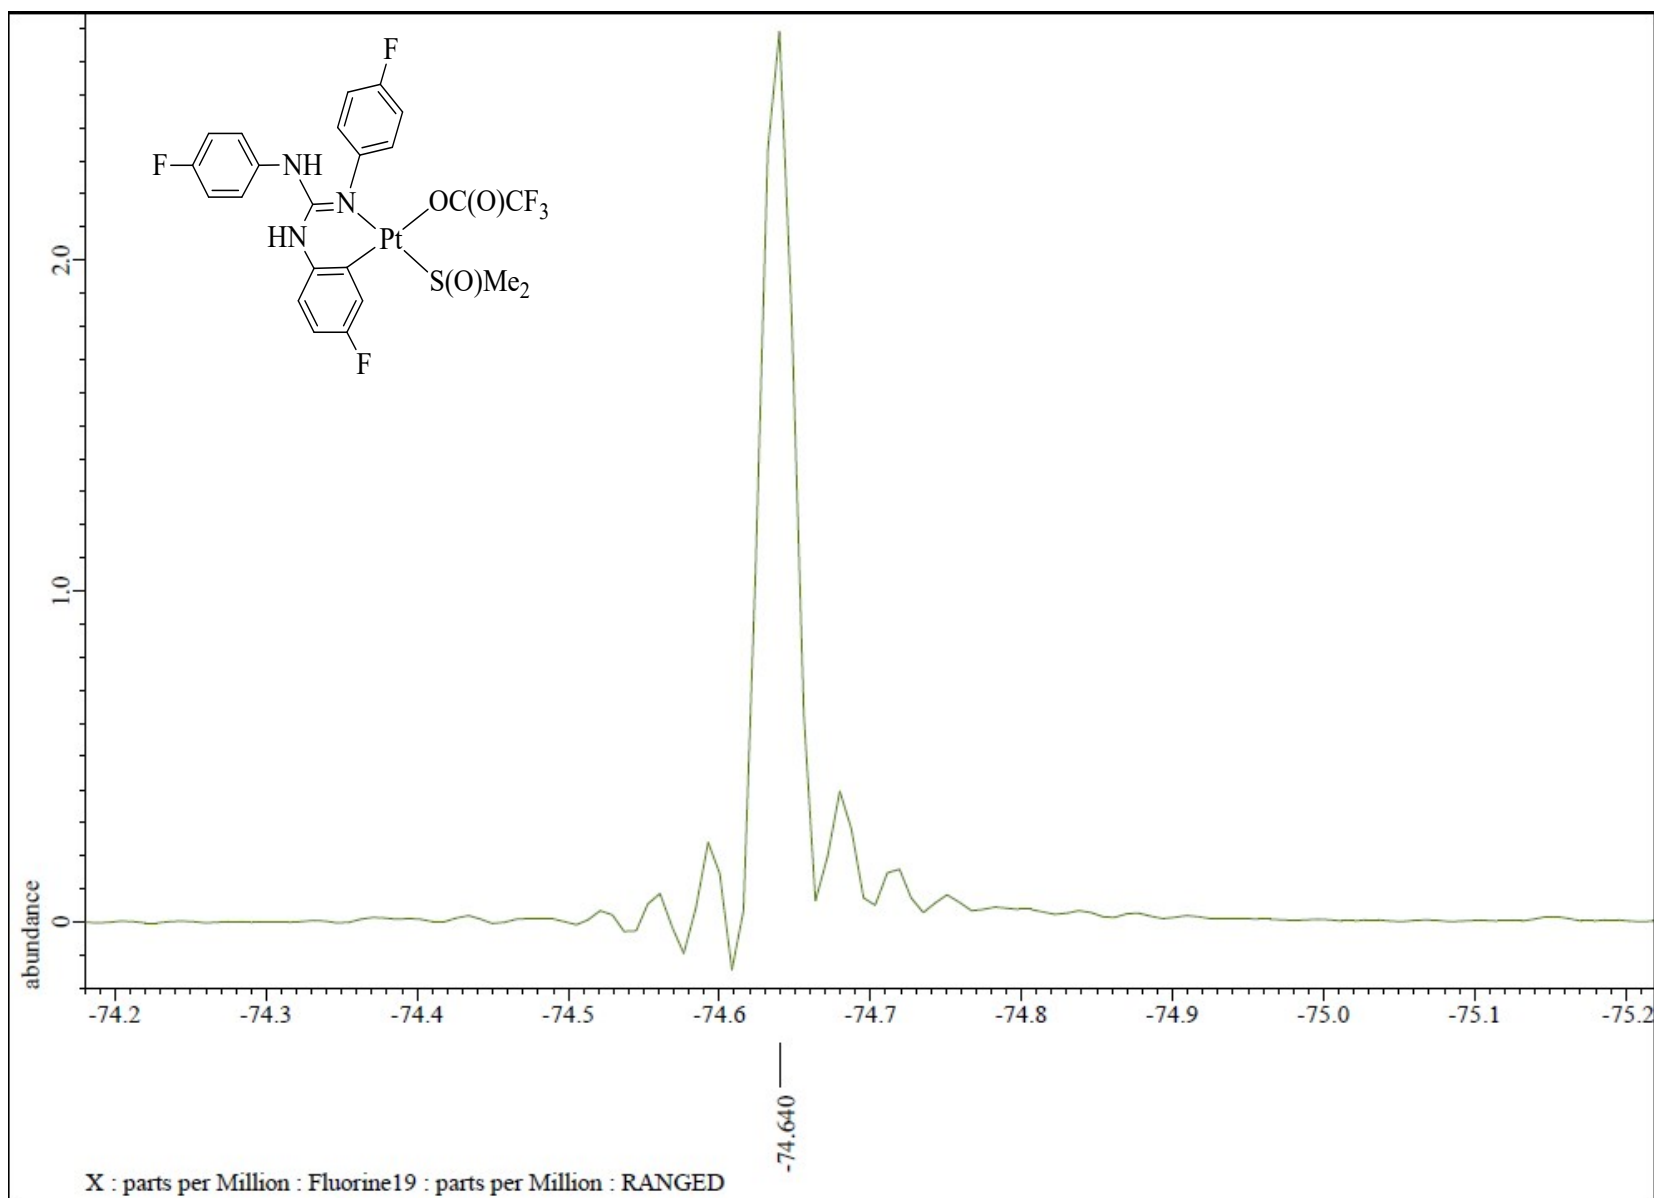

**Fig. S66**  $^{19}\text{F}$   $\{^1\text{H}\}$  NMR ( $\text{CDCl}_3$ , 376.31 MHz) spectrum of **9** in the indicated region.

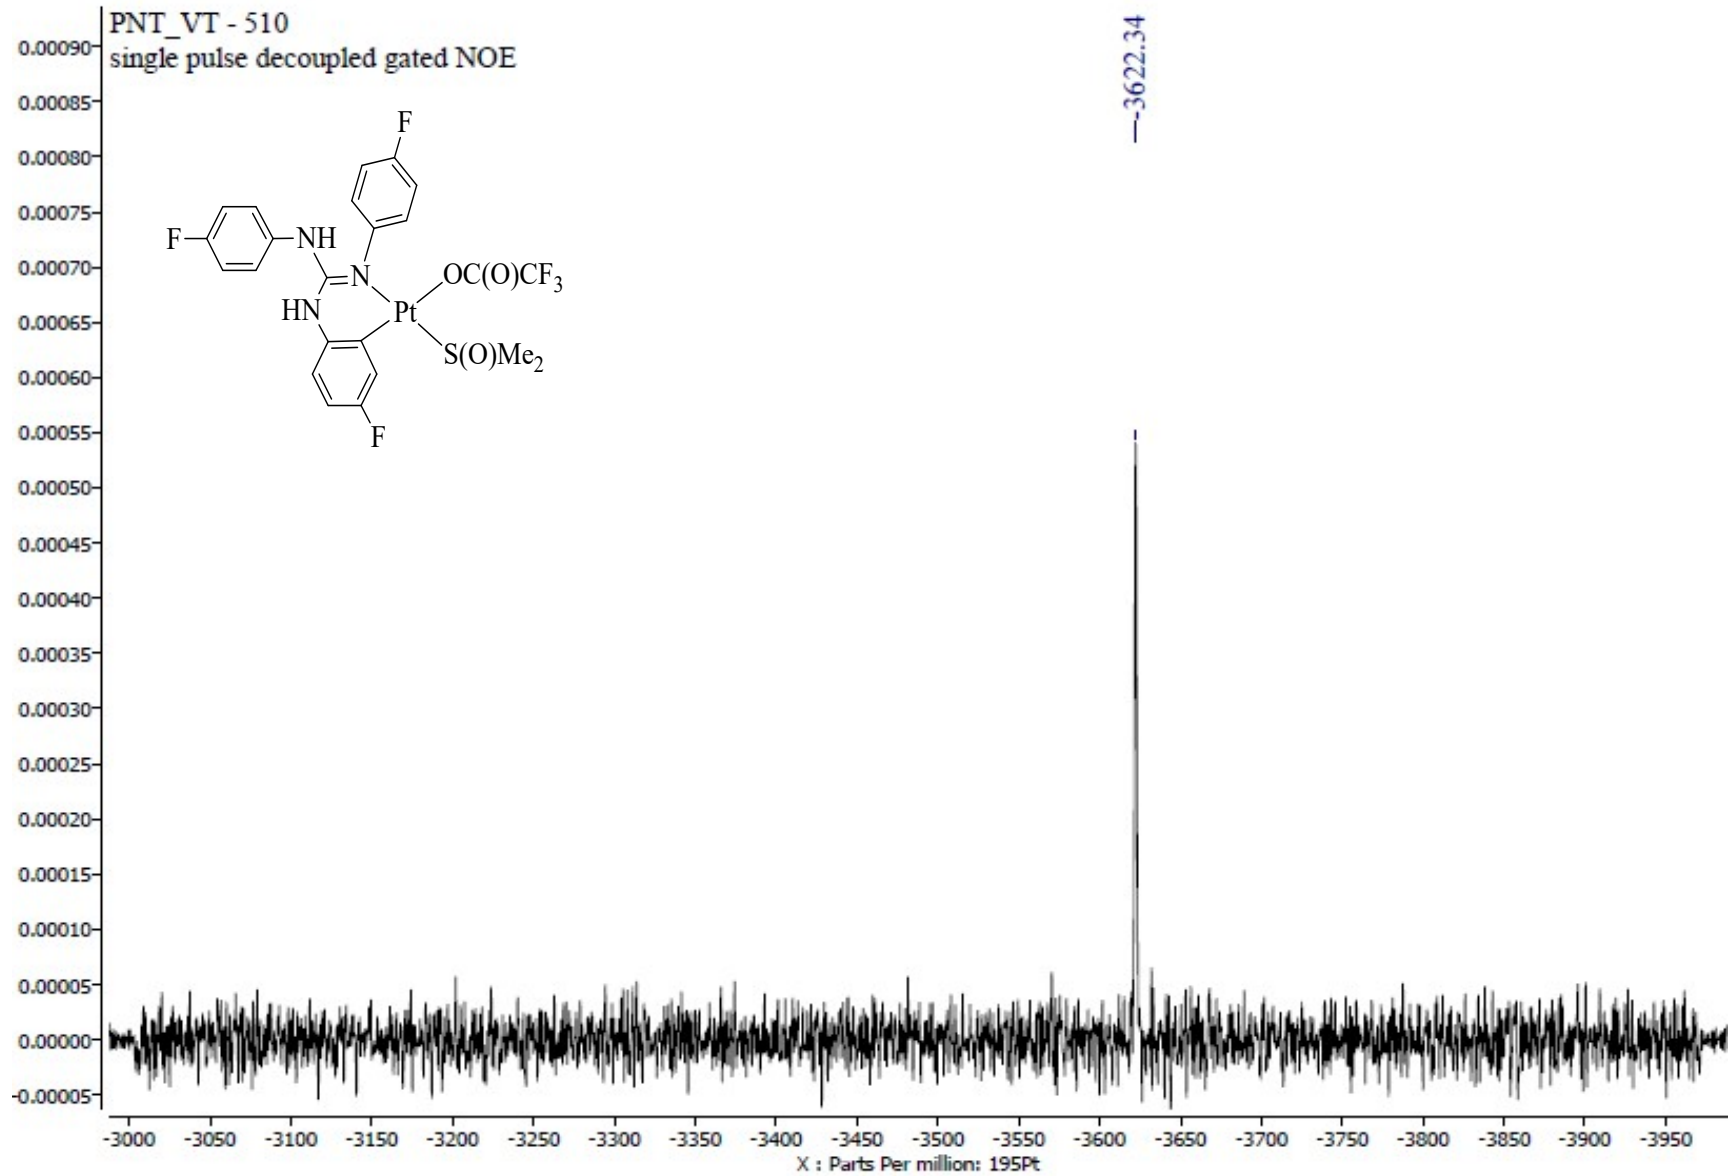

Fig. S67  $^{195}\text{Pt}\{^1\text{H}\}$  NMR ( $\text{CDCl}_3$ , 85.8 MHz) spectrum of **9**.

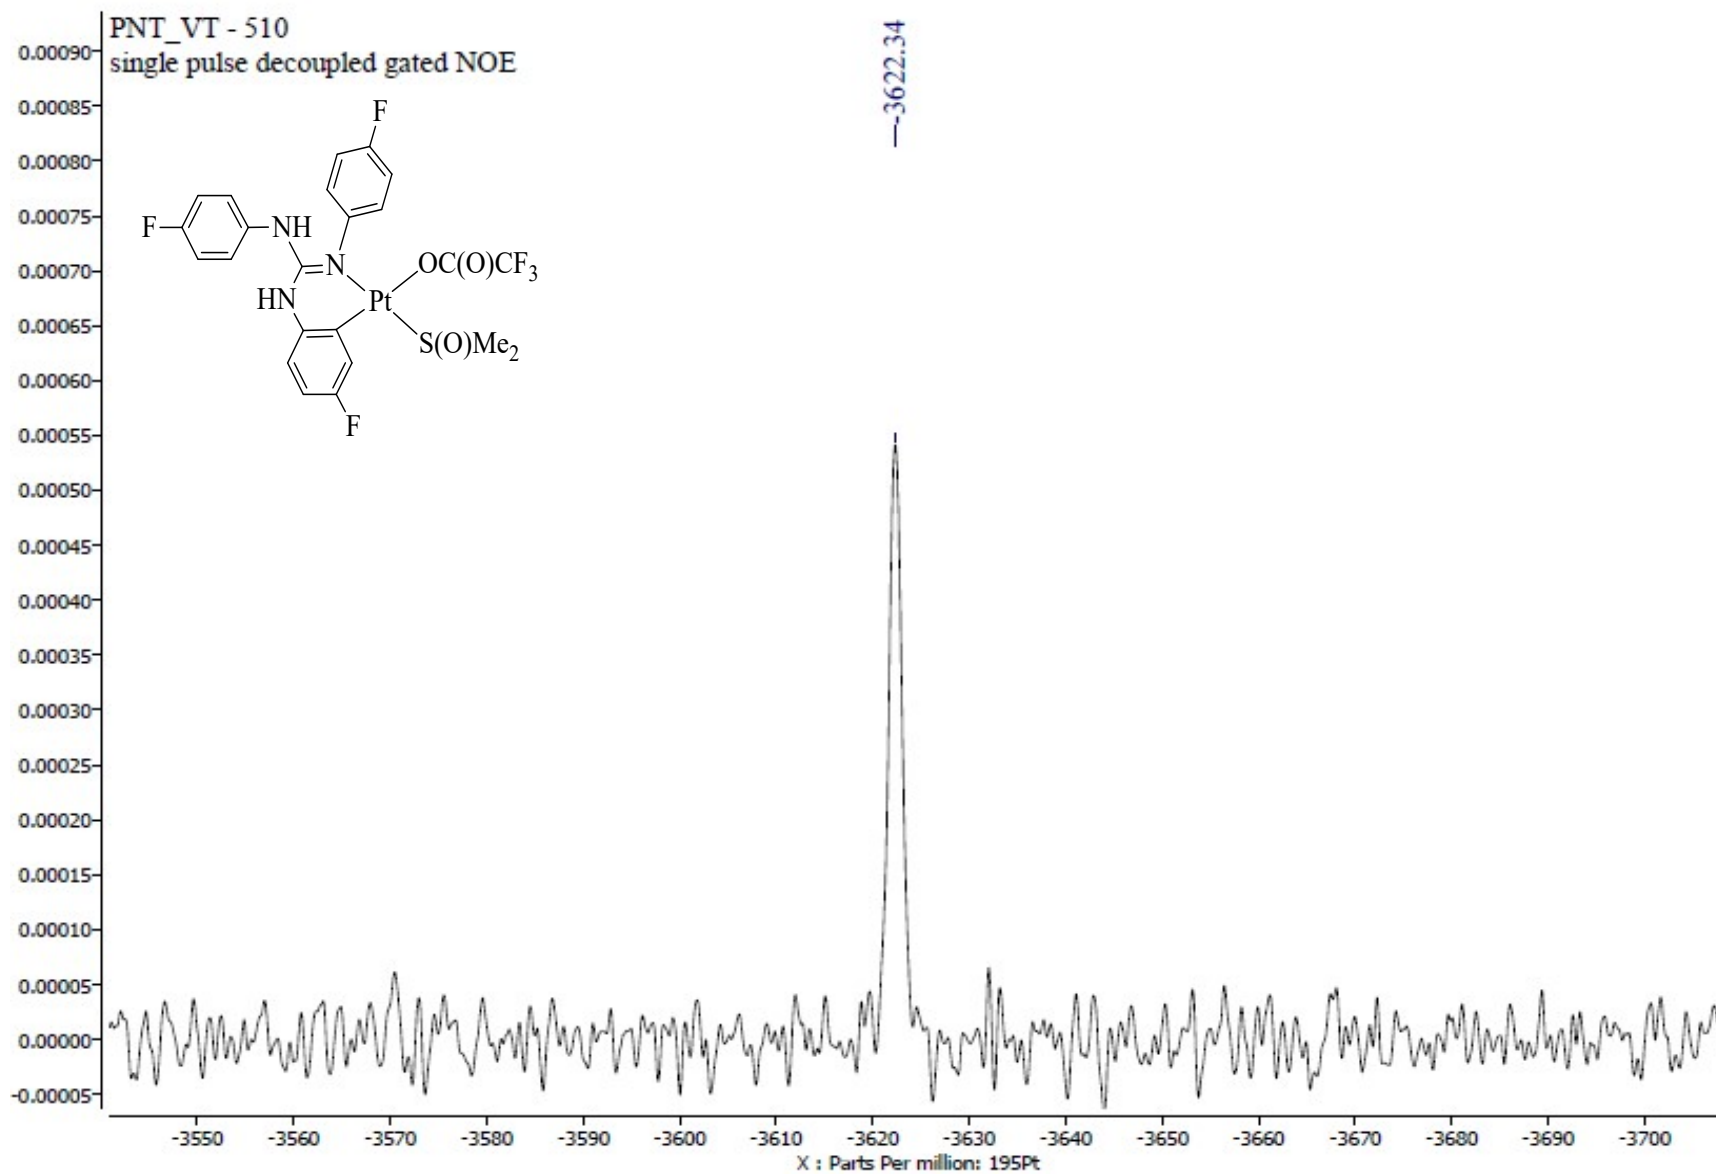

Fig. S68  $^{195}\text{Pt}\{^1\text{H}\}$  NMR ( $\text{CDCl}_3$ , 85.8 MHz) spectrum of **9** in the indicated region.

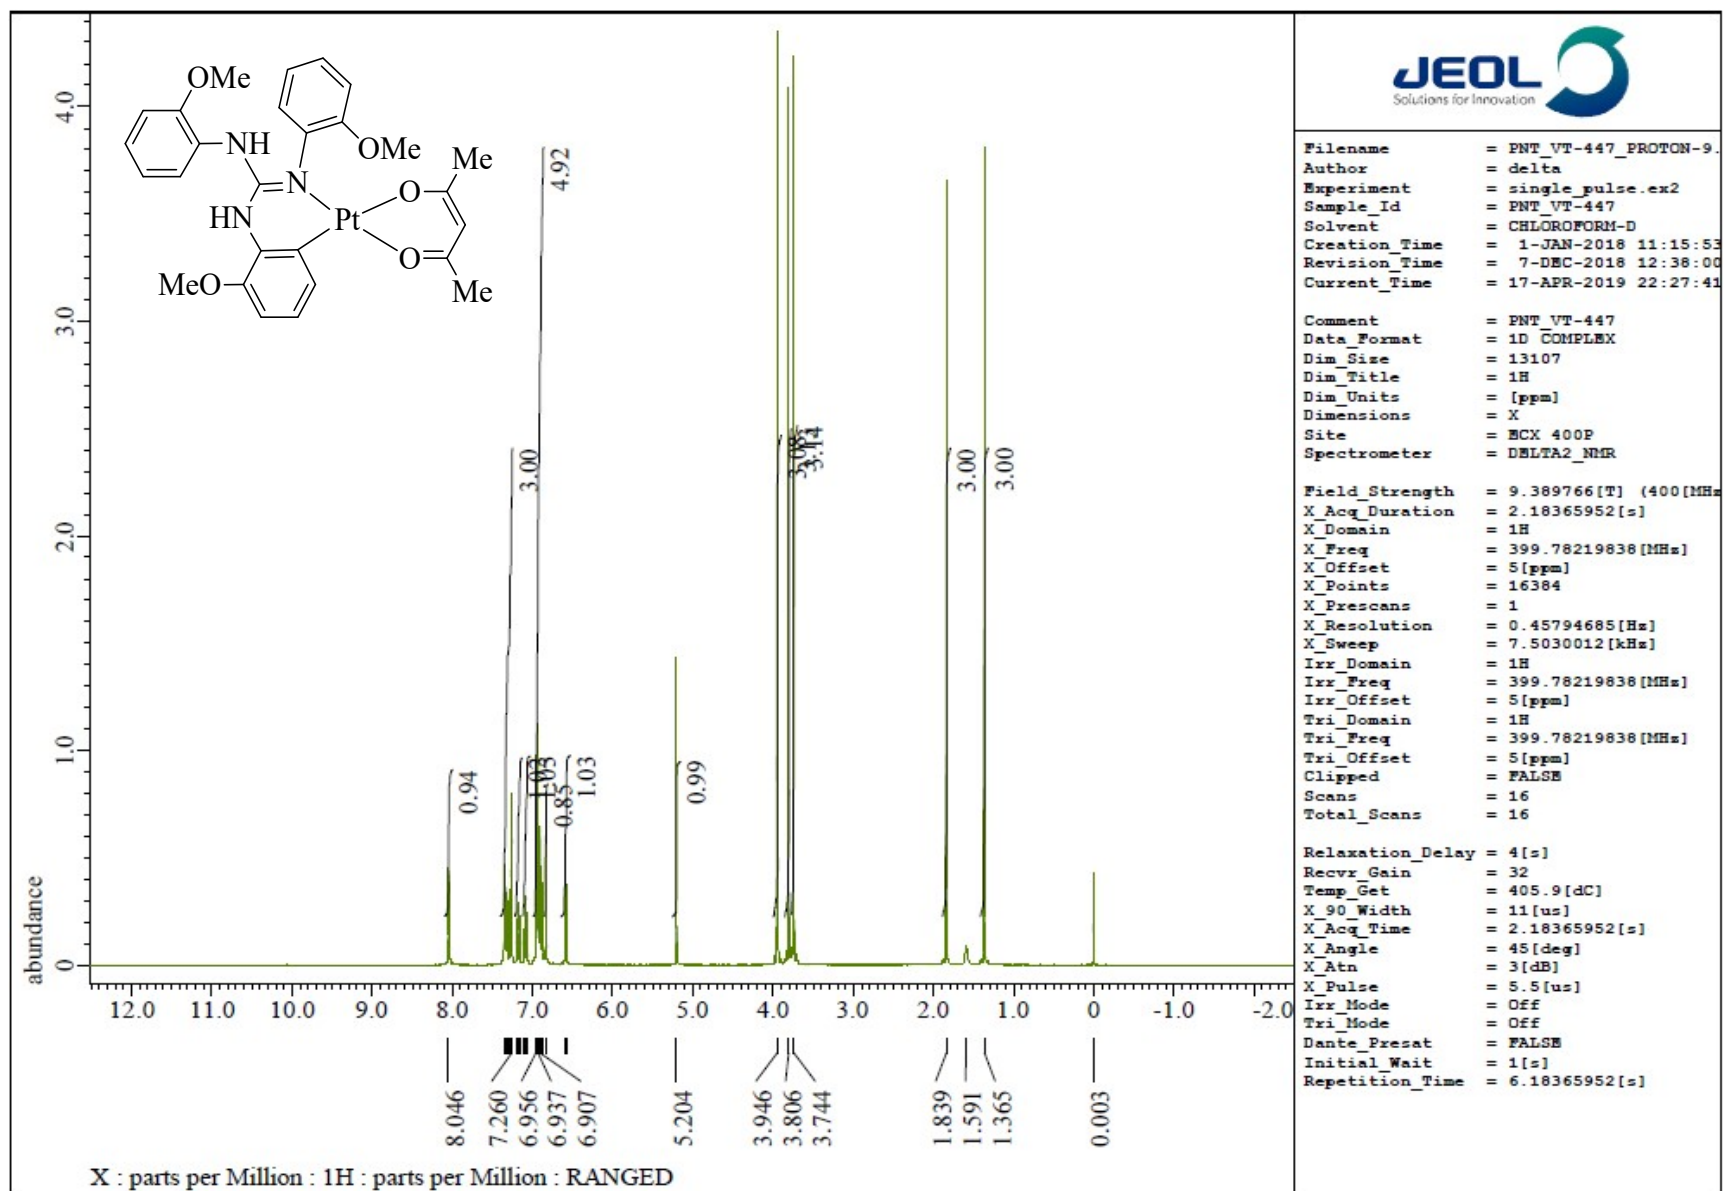

Fig. S69 <sup>1</sup>H NMR (CDCl<sub>3</sub>, 400 MHz) spectrum of 10.

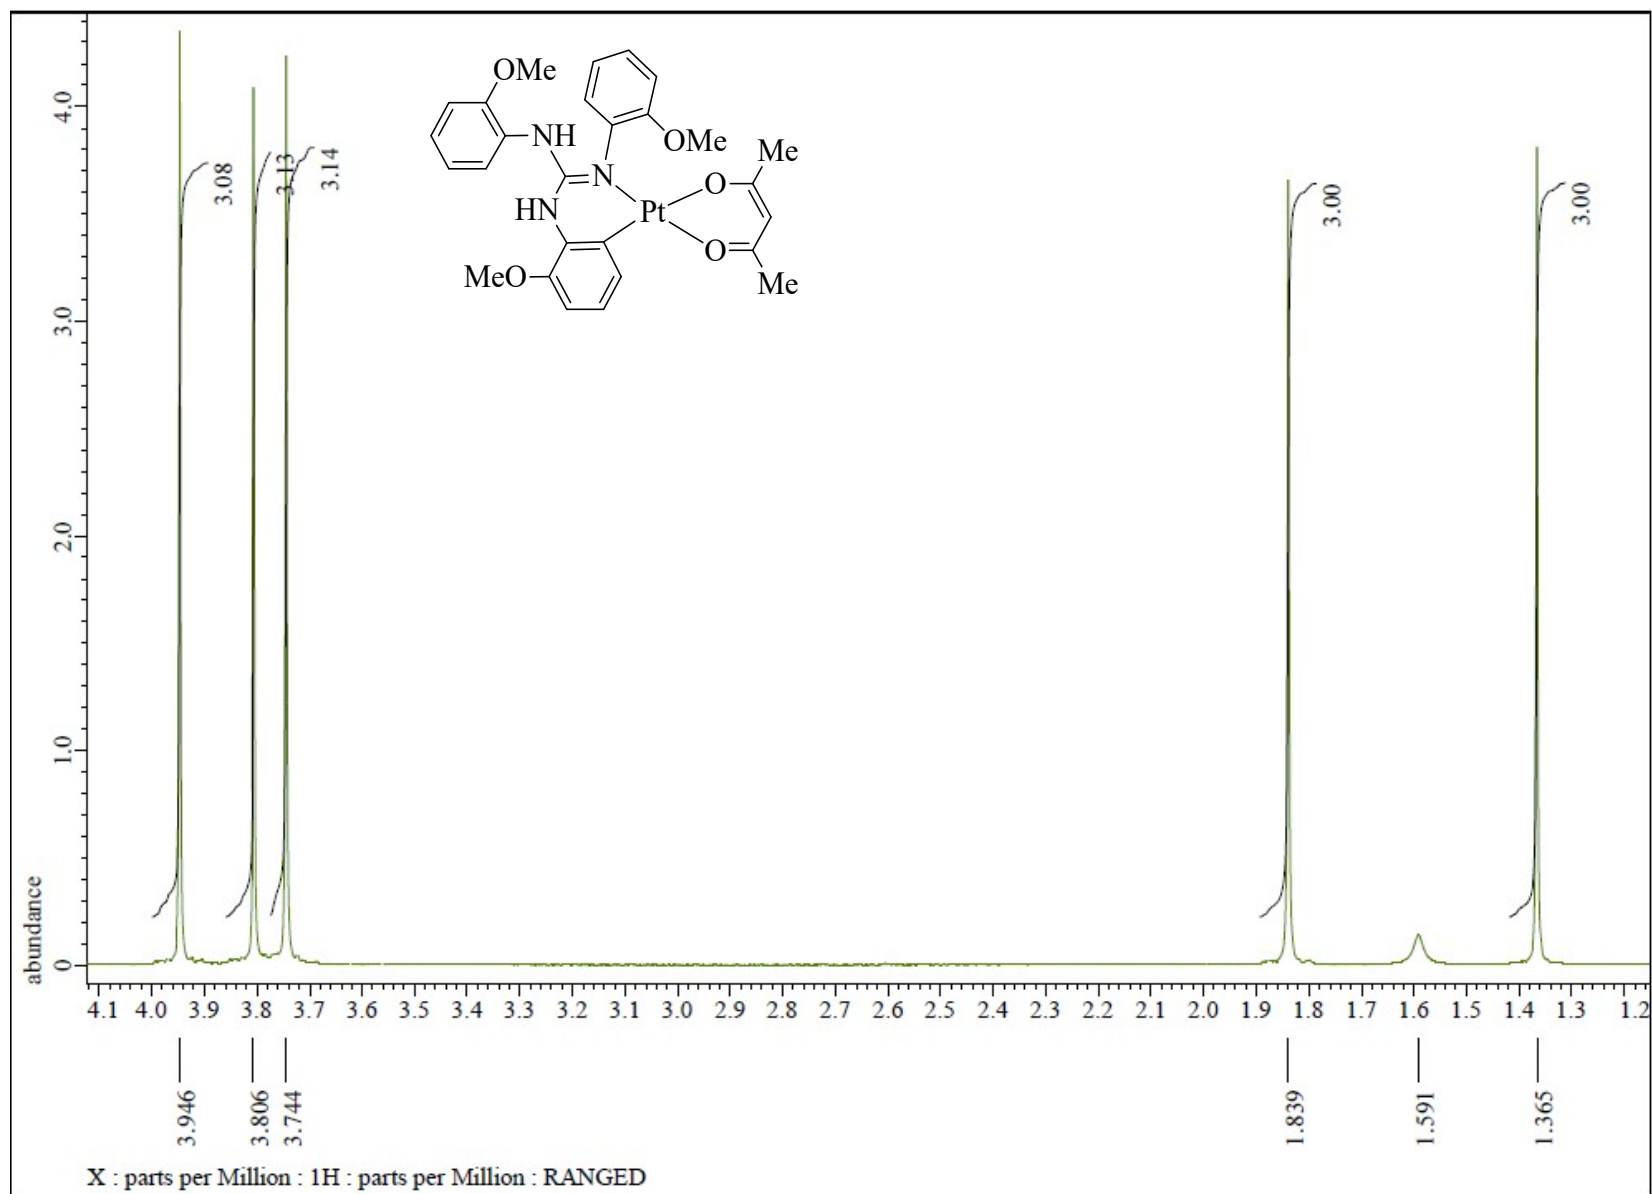

Fig. S70  $^1\text{H}$  NMR ( $\text{CDCl}_3$ , 400 MHz) spectrum of **10** in the indicated region.



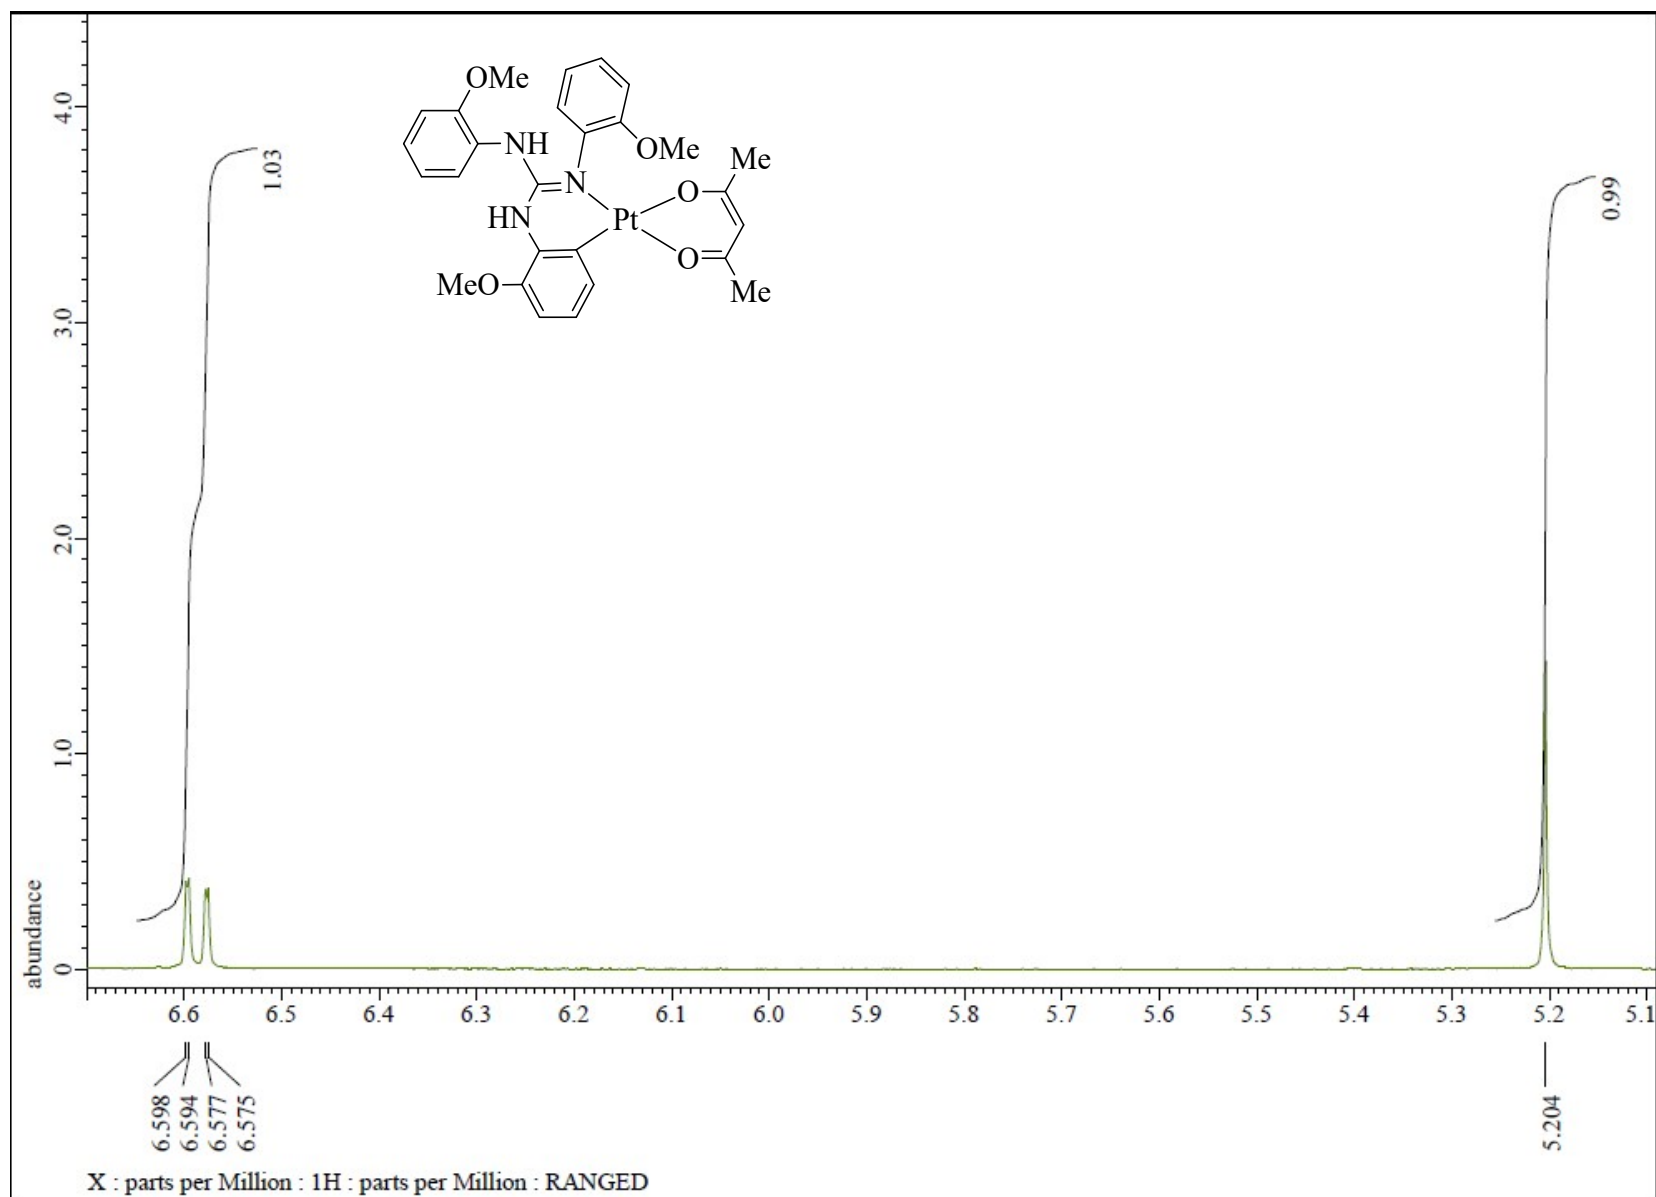

Fig. S71  $^1\text{H}$  NMR (CDCl<sub>3</sub>, 400 MHz) spectrum of **10** in the indicated region.

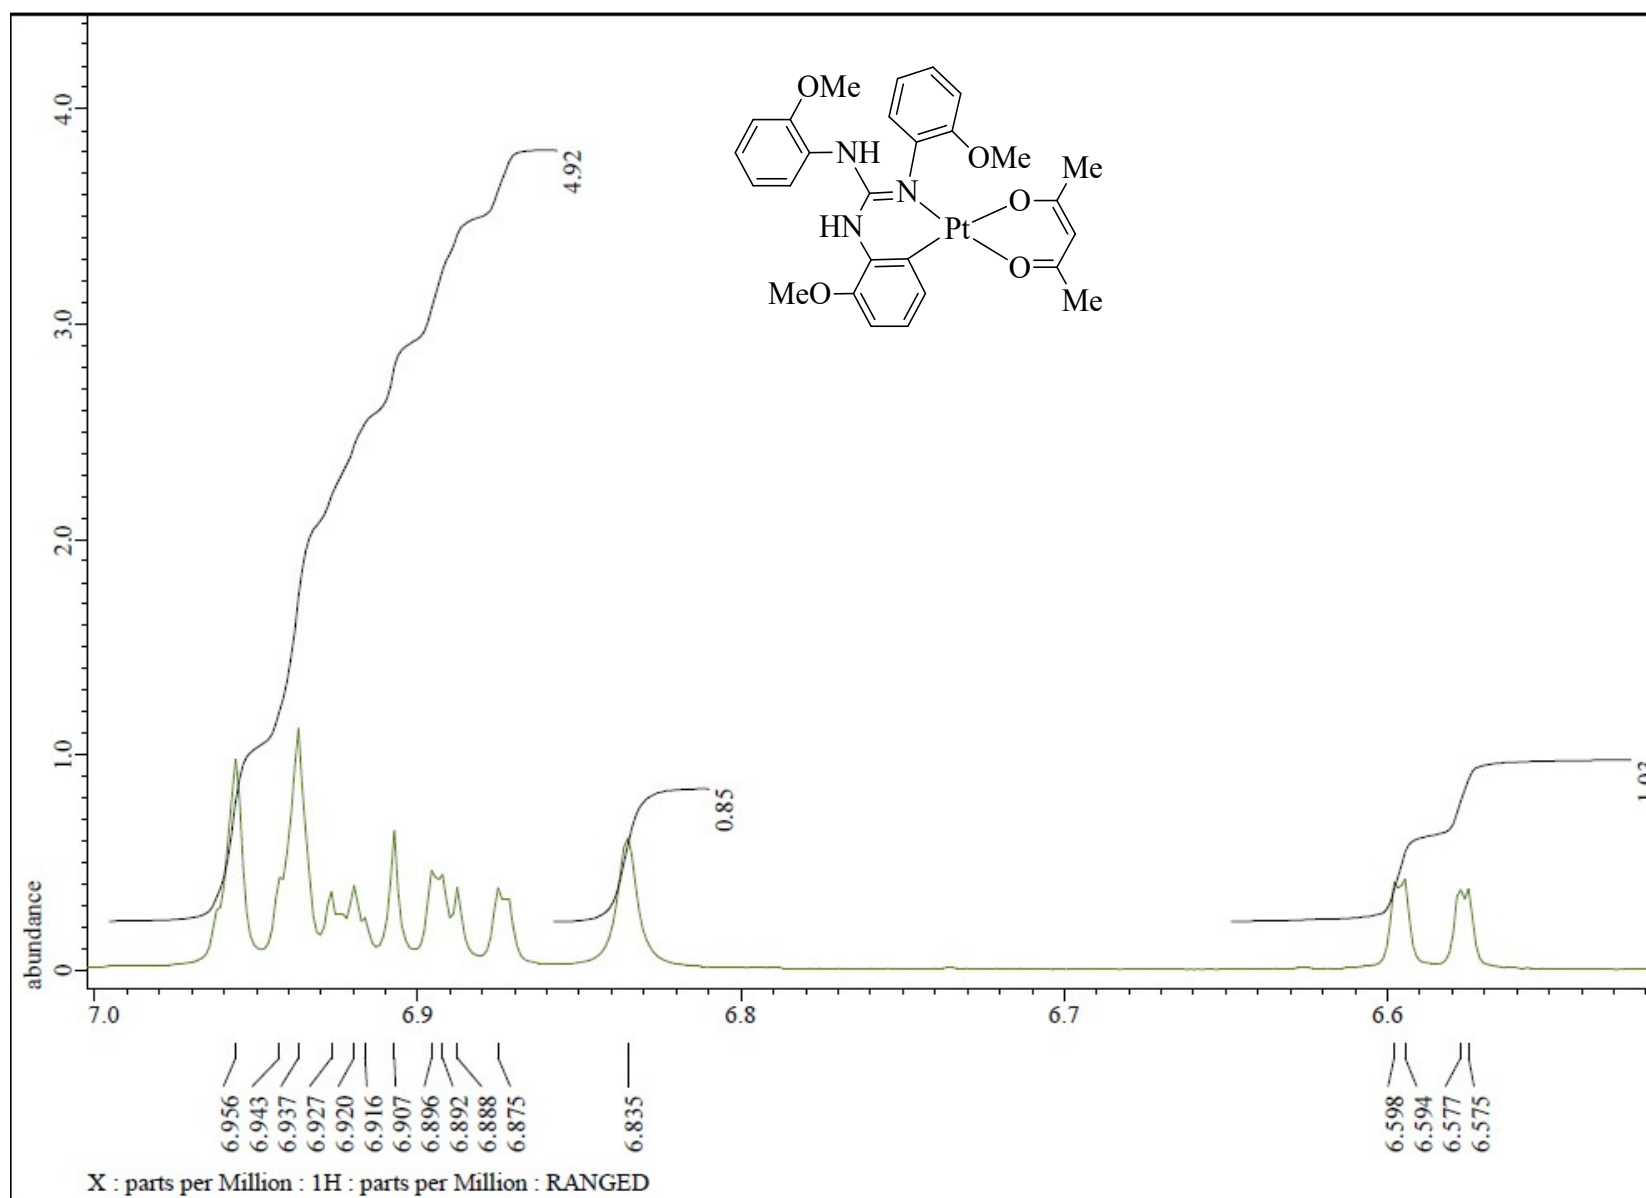

Fig. S72  $^1\text{H}$  NMR ( $\text{CDCl}_3$ , 400 MHz) spectrum of **10** in the indicated region.

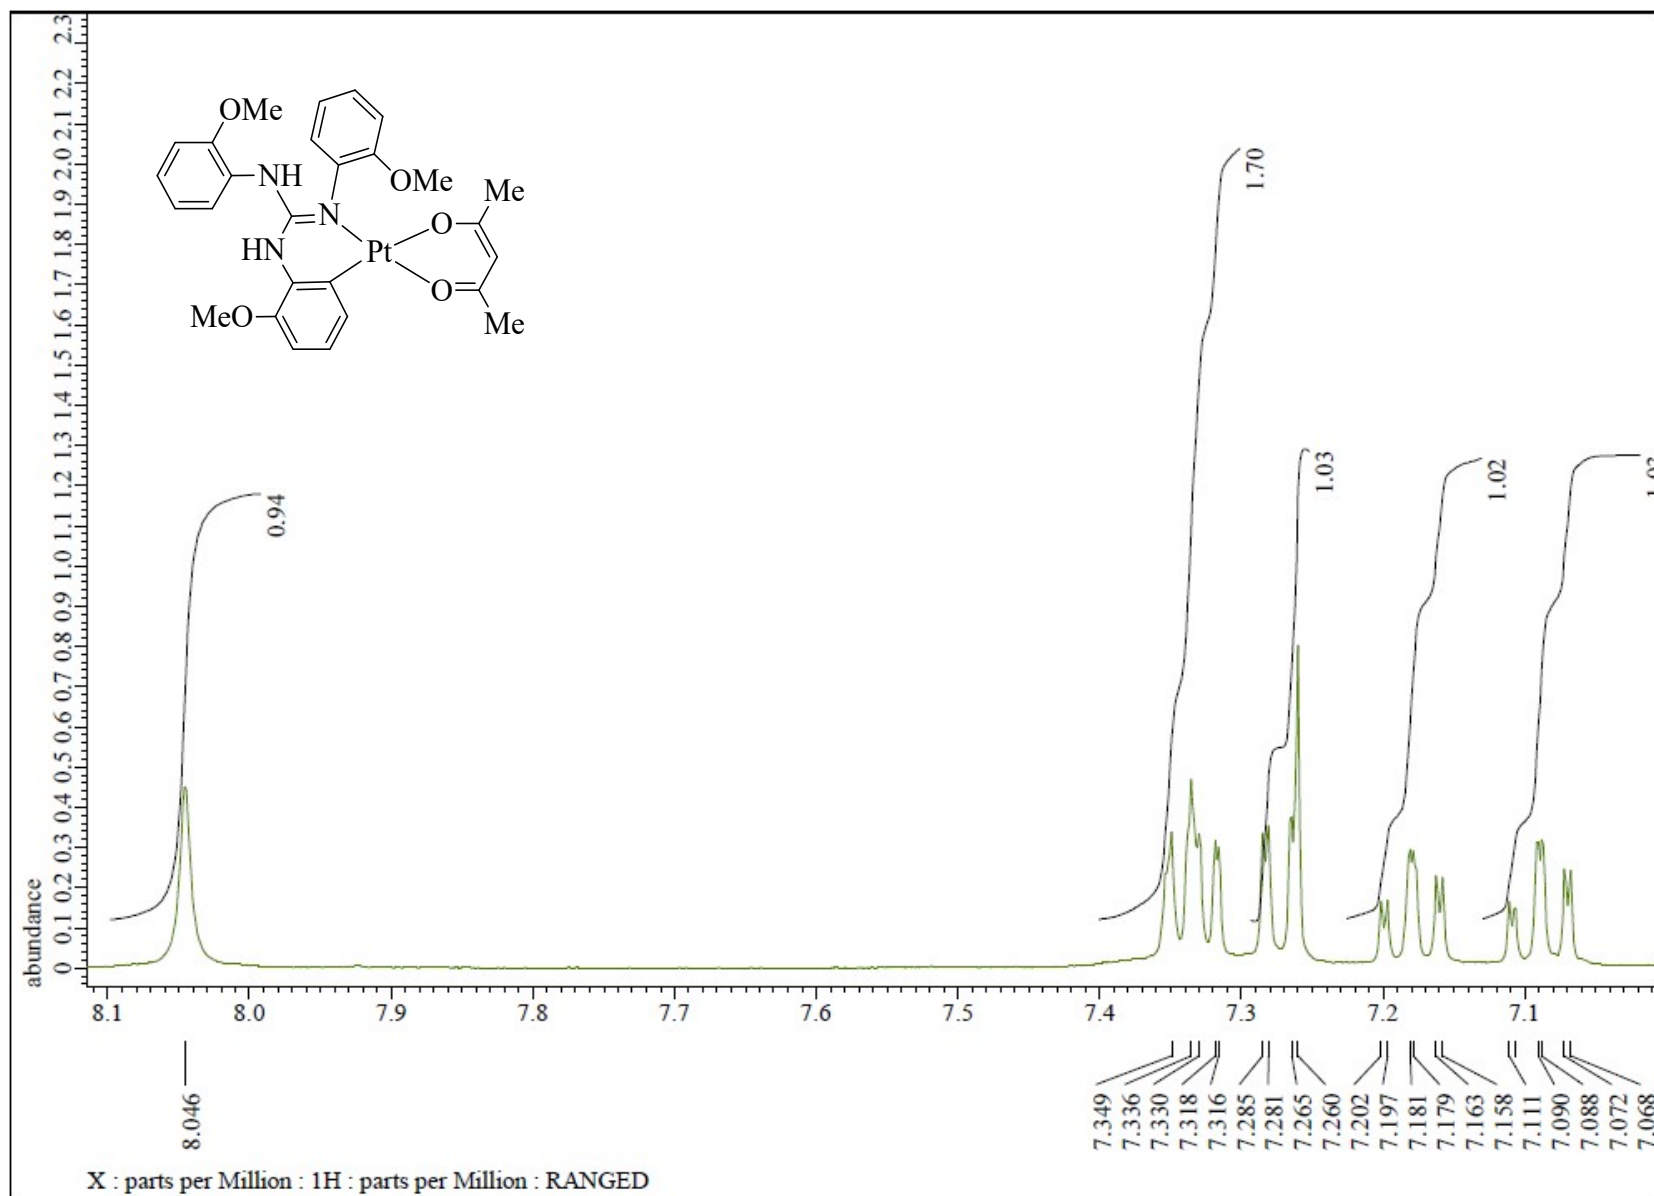

Fig. S73  $^1\text{H NMR}$  (CDCl<sub>3</sub>, 400 MHz) spectrum of **10** in the indicated region.

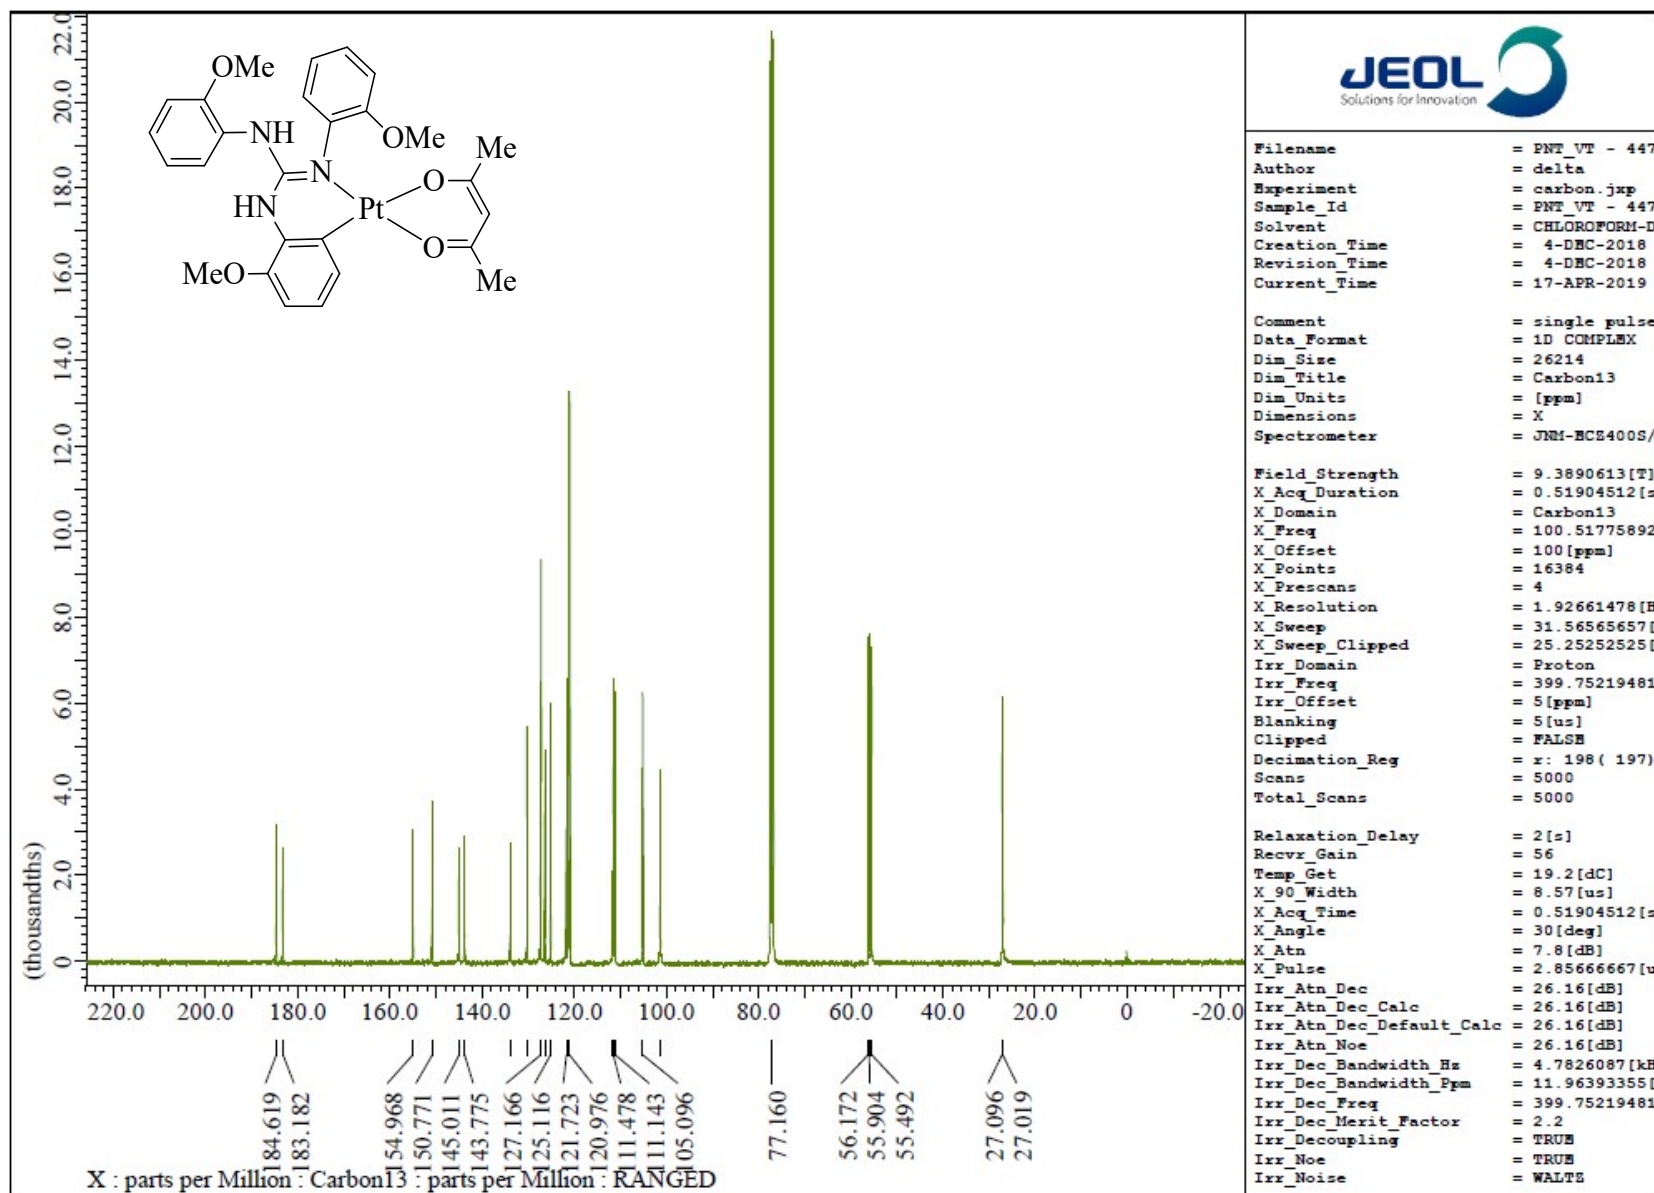

Fig. S74 <sup>13</sup>C NMR (CDCl<sub>3</sub>, 100.5 MHz) spectrum of 10.

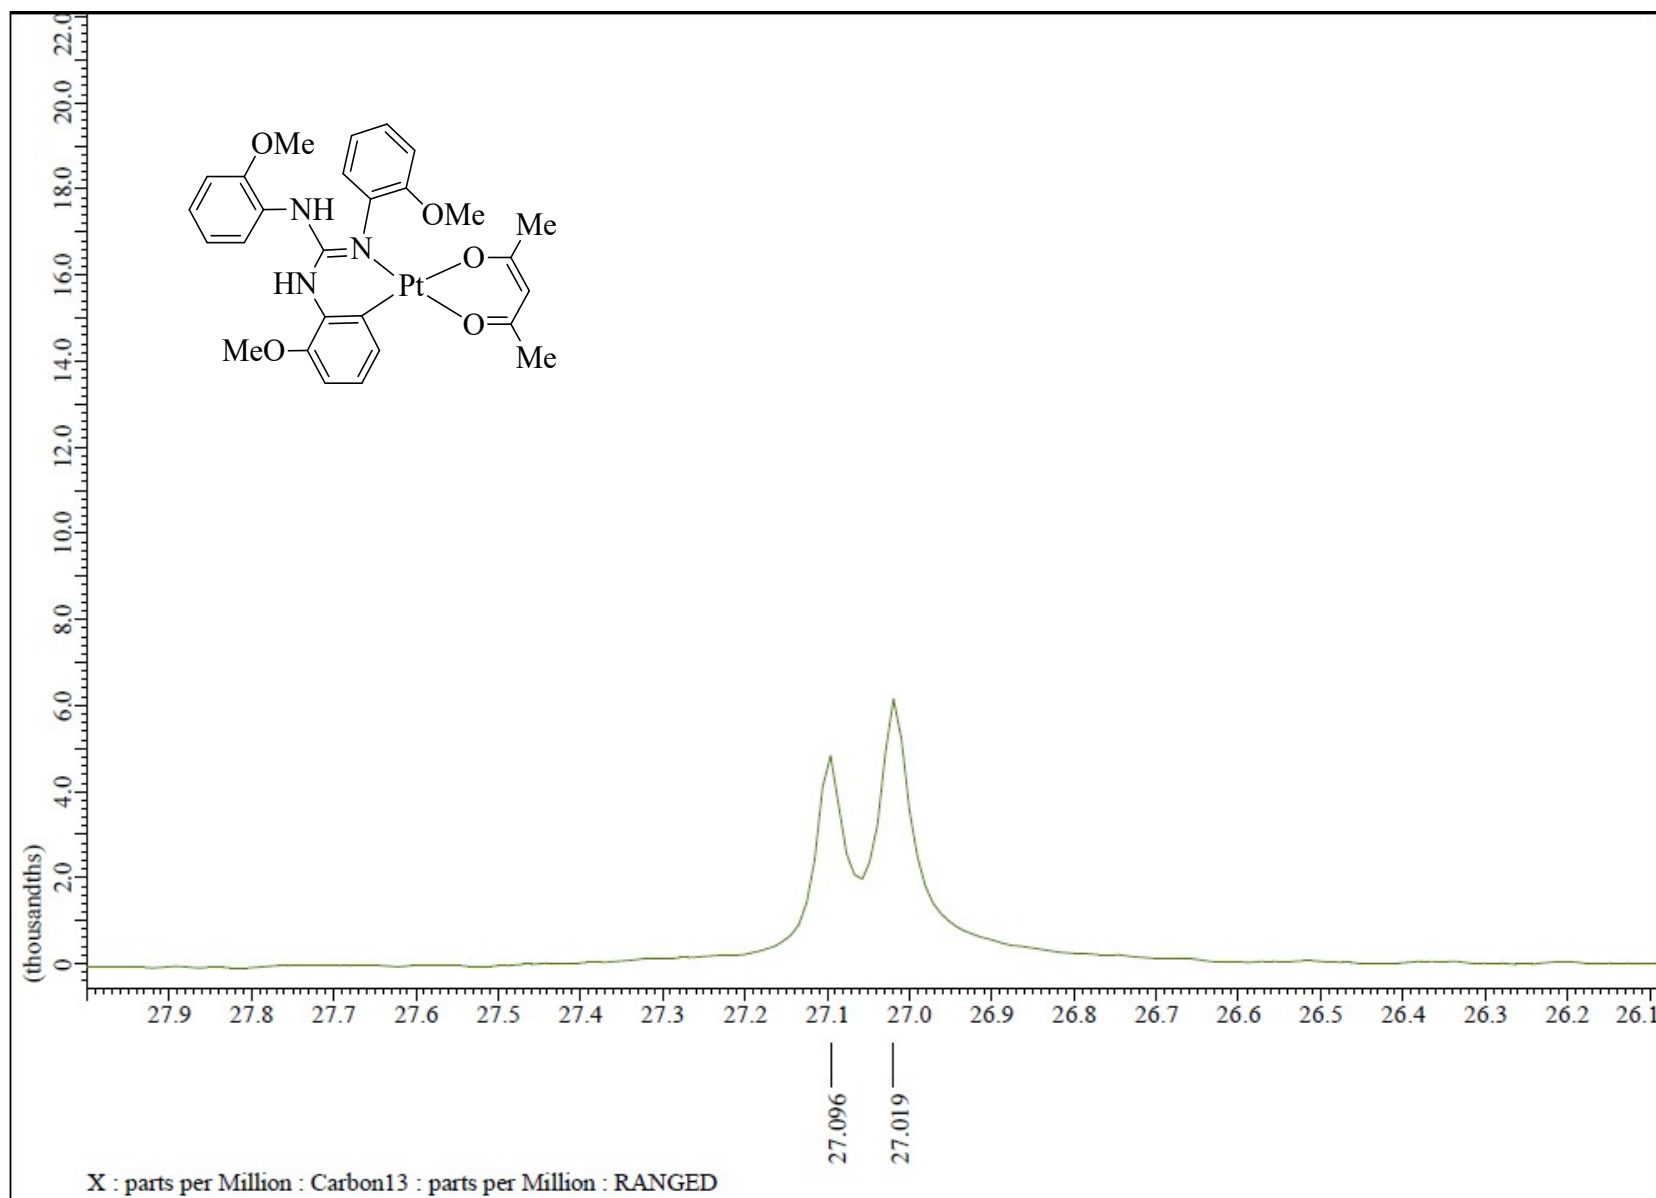

Fig. S75  $^{13}\text{C}$  NMR ( $\text{CDCl}_3$ , 100.5 MHz) spectrum of **10** in the indicated region.

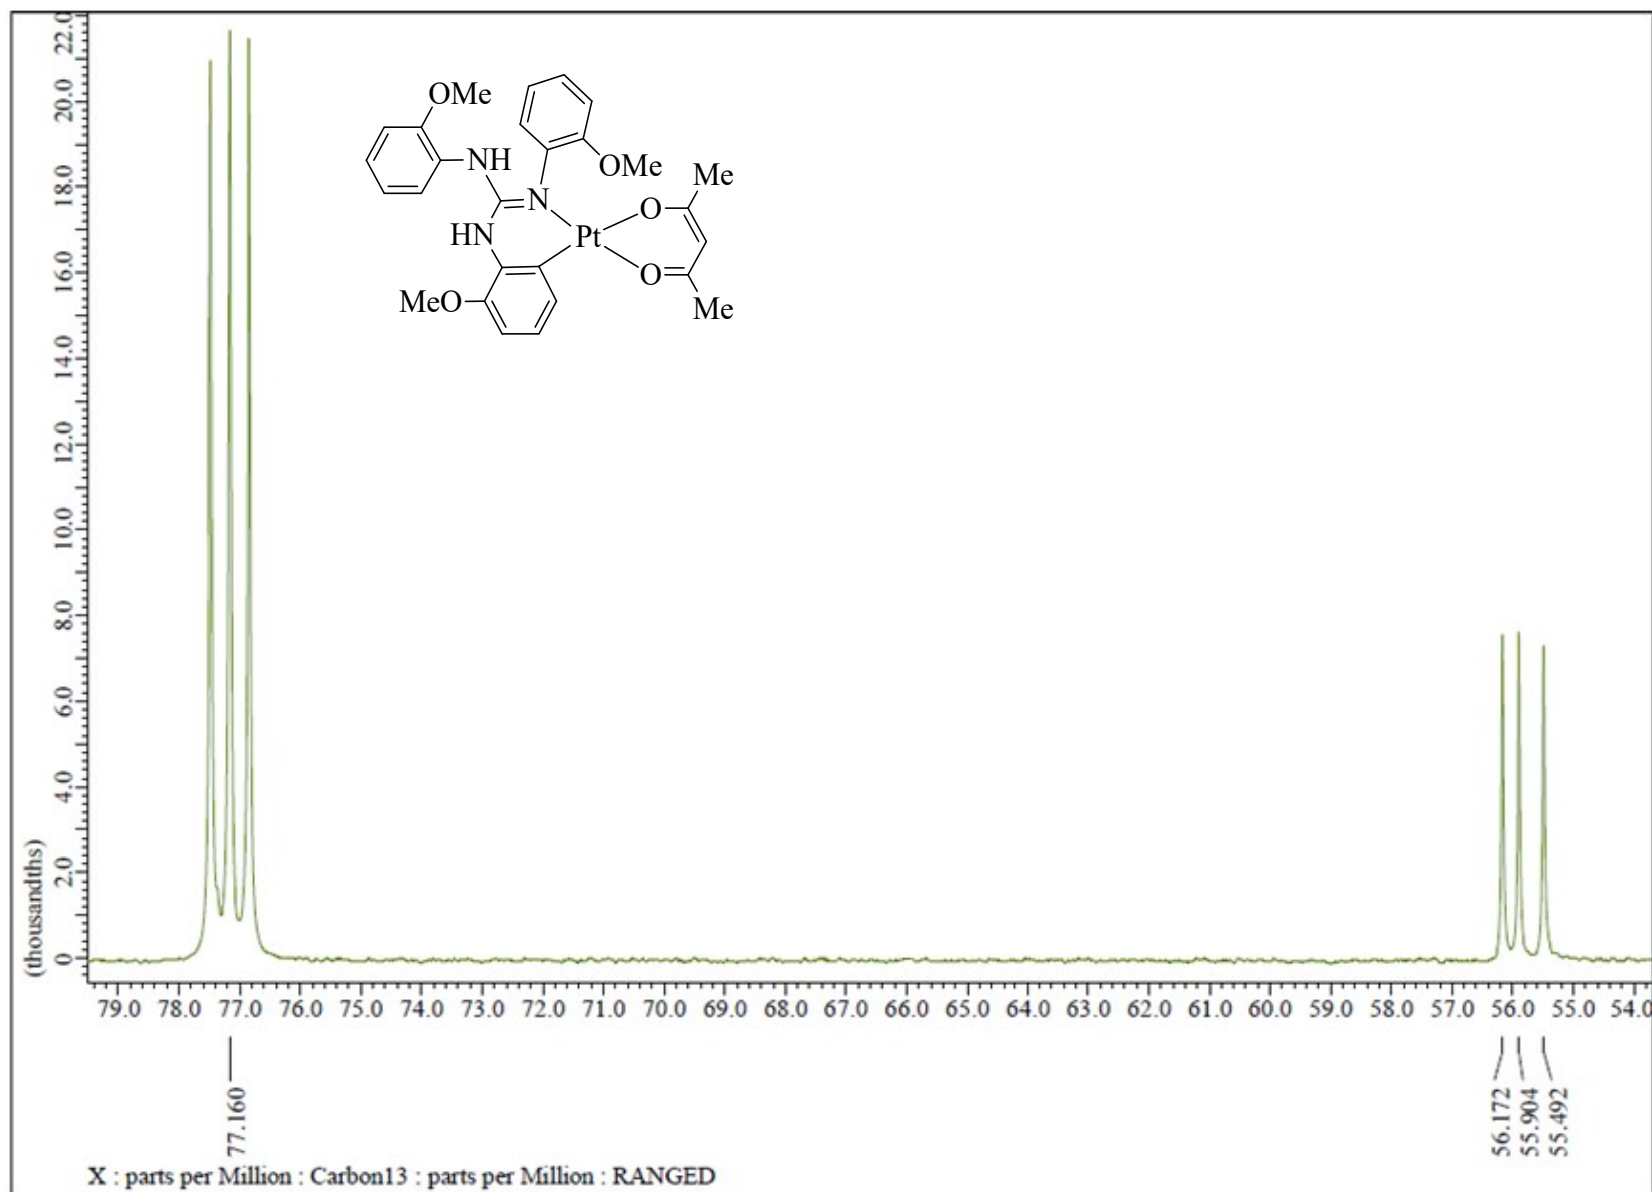

Fig. S76  $^{13}\text{C}$  NMR ( $\text{CDCl}_3$ , 100.5 MHz) spectrum of **10** in the indicated region.

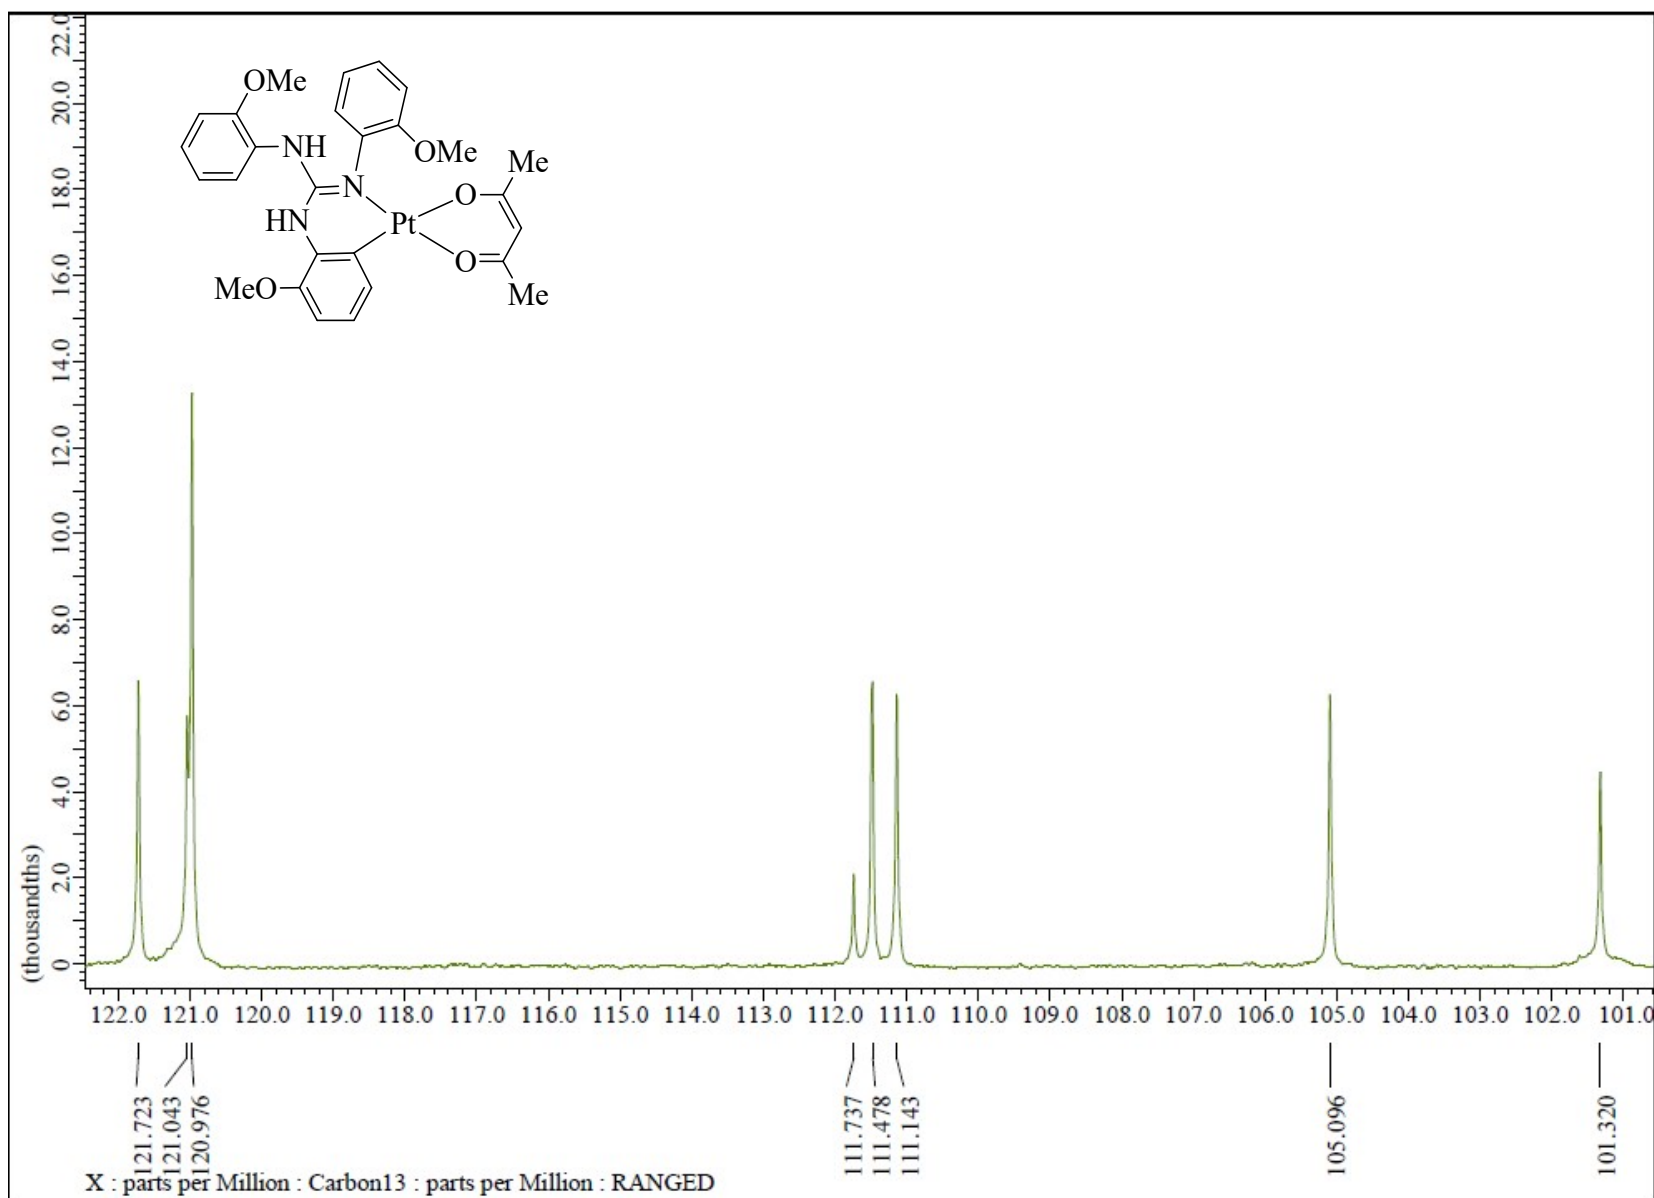

Fig. S77  $^{13}\text{C}$  NMR (CDCl<sub>3</sub>, 100.5 MHz) spectrum of **10** in the indicated region.

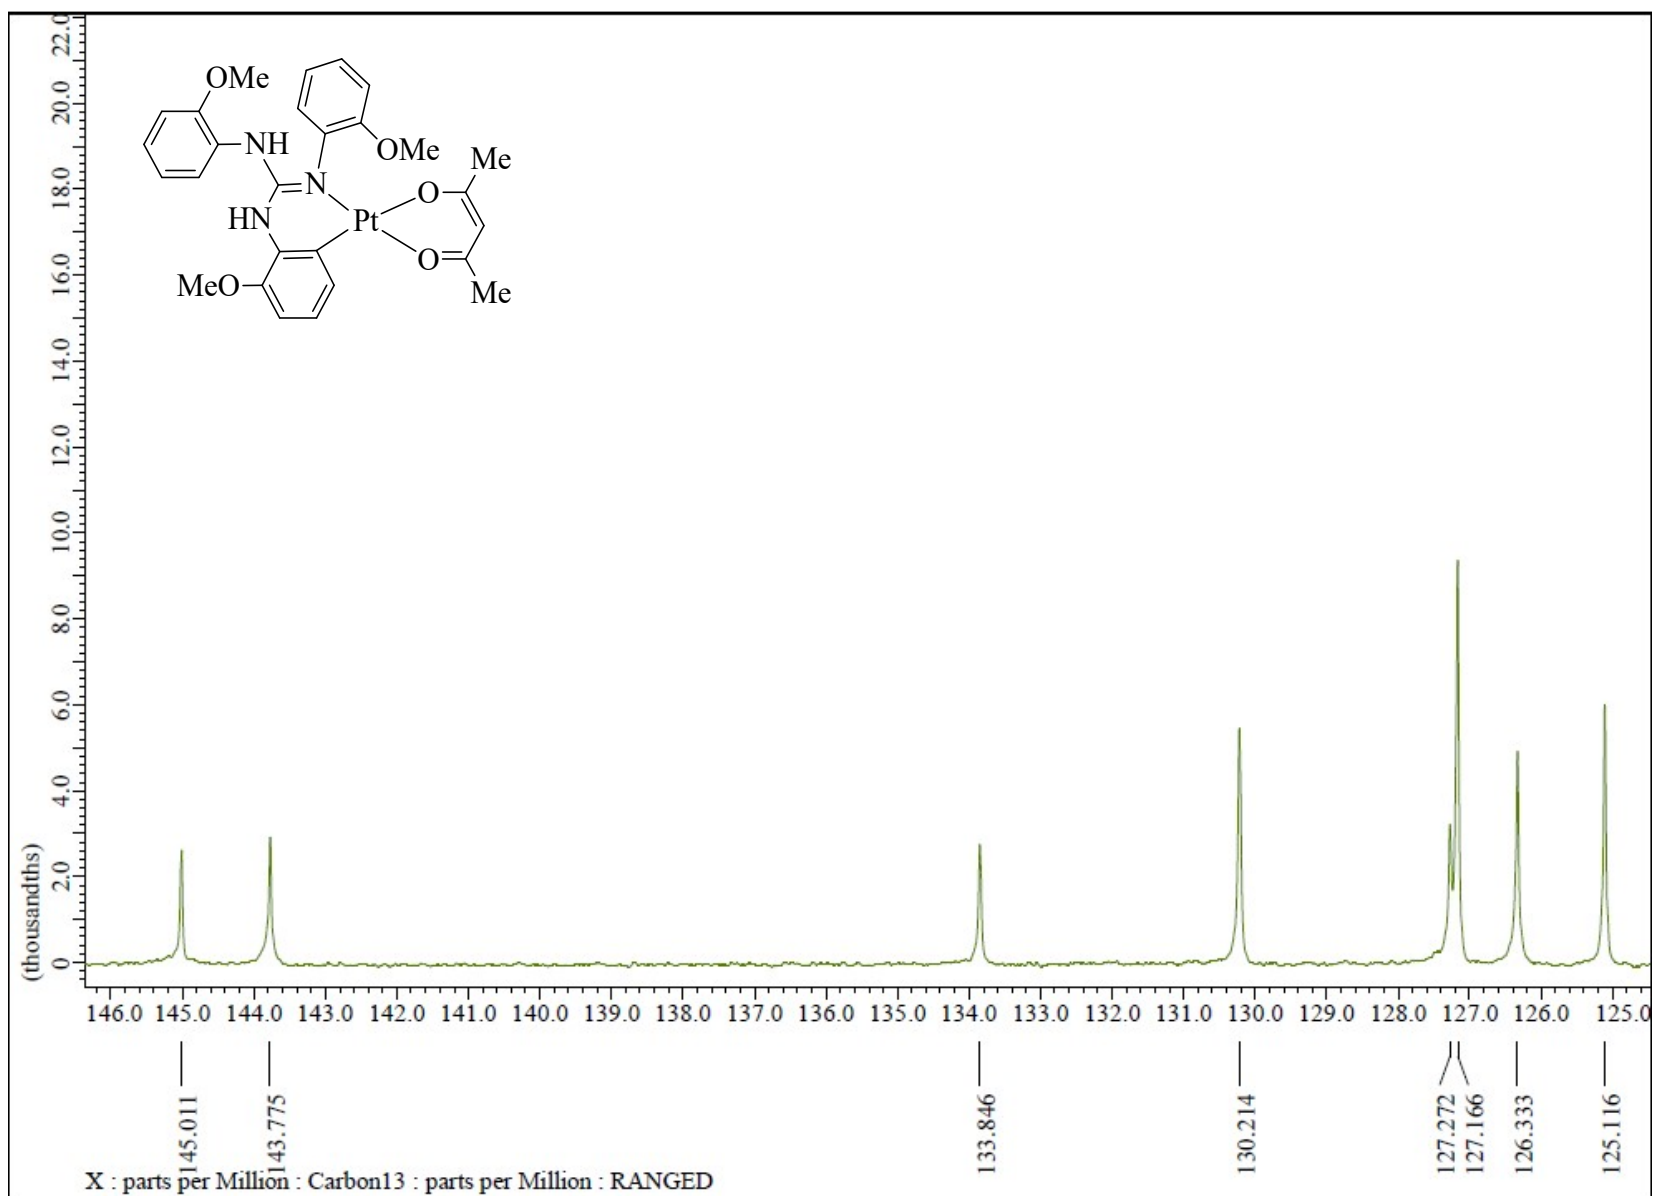

Fig. S78  $^{13}\text{C}$  NMR (CDCl<sub>3</sub>, 100.5 MHz) spectrum of **10** in the indicated region.



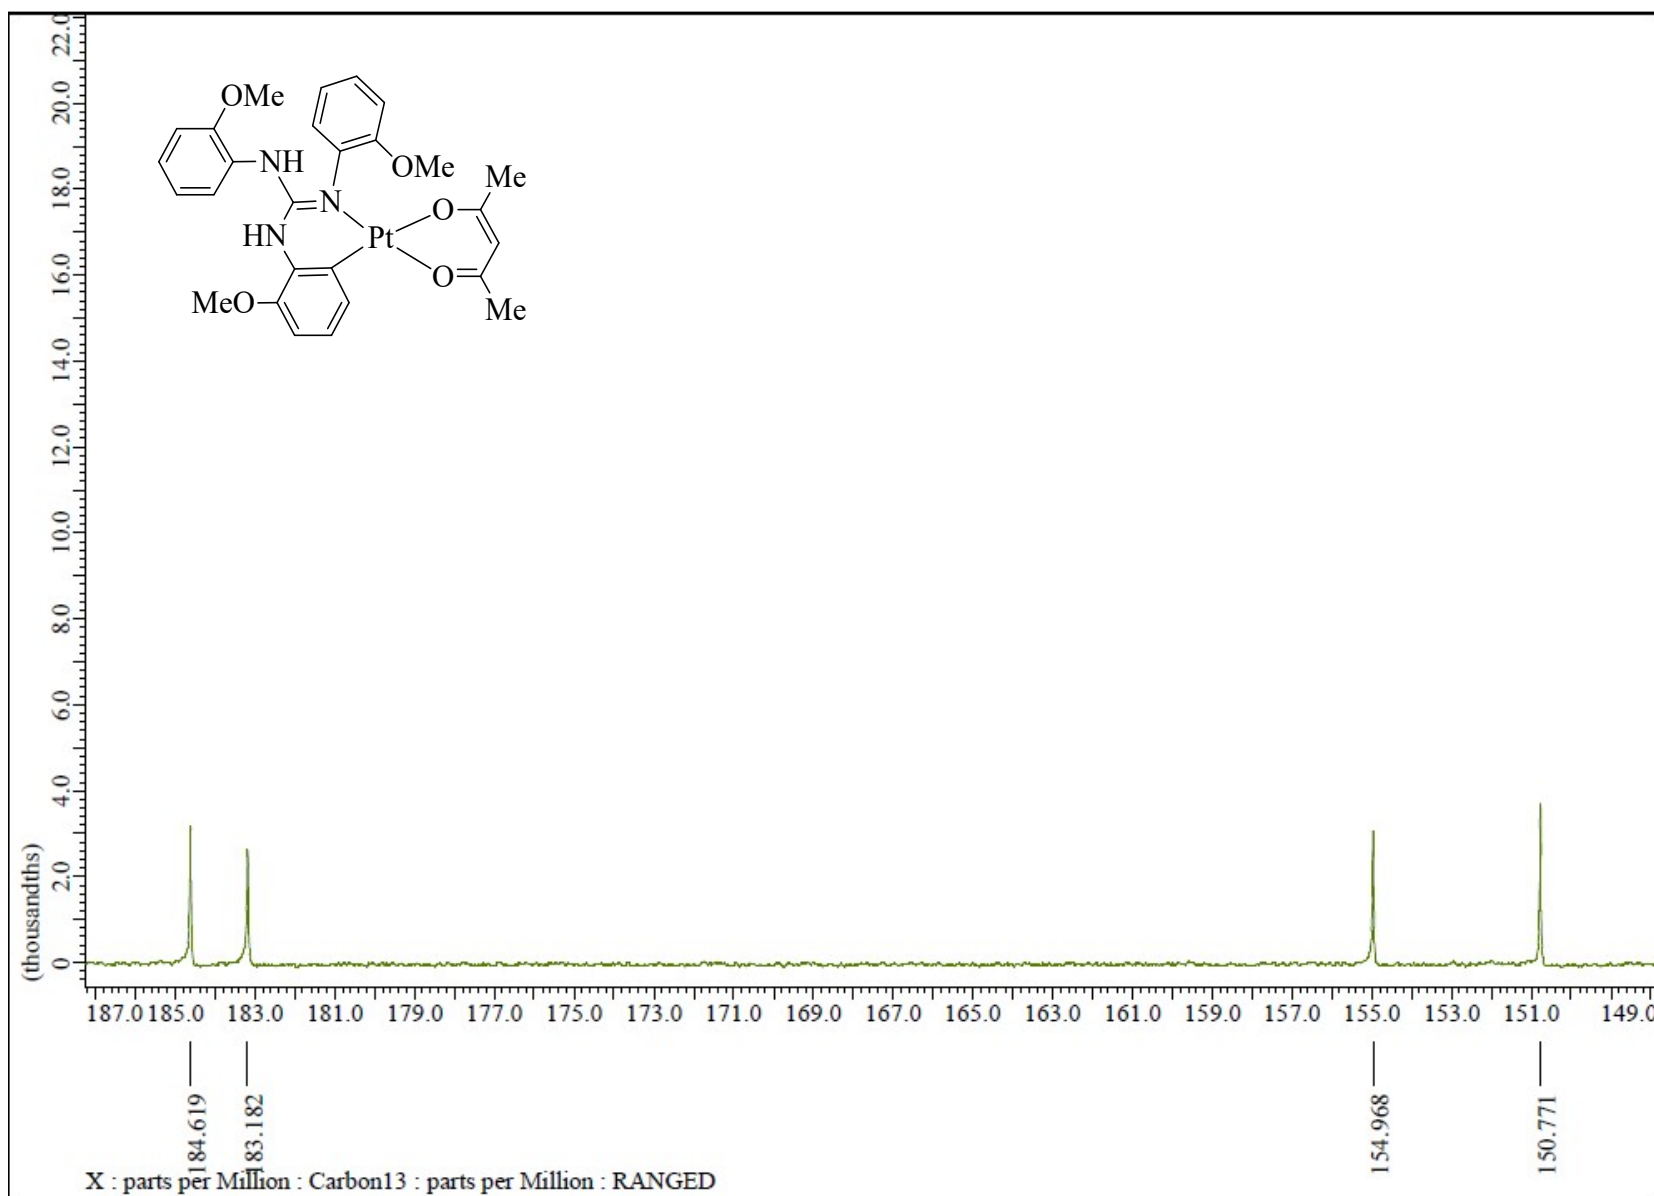

Fig. S79  $^{13}\text{C}$  NMR (CDCl<sub>3</sub>, 100.5 MHz) spectrum of **10** in the indicated region.

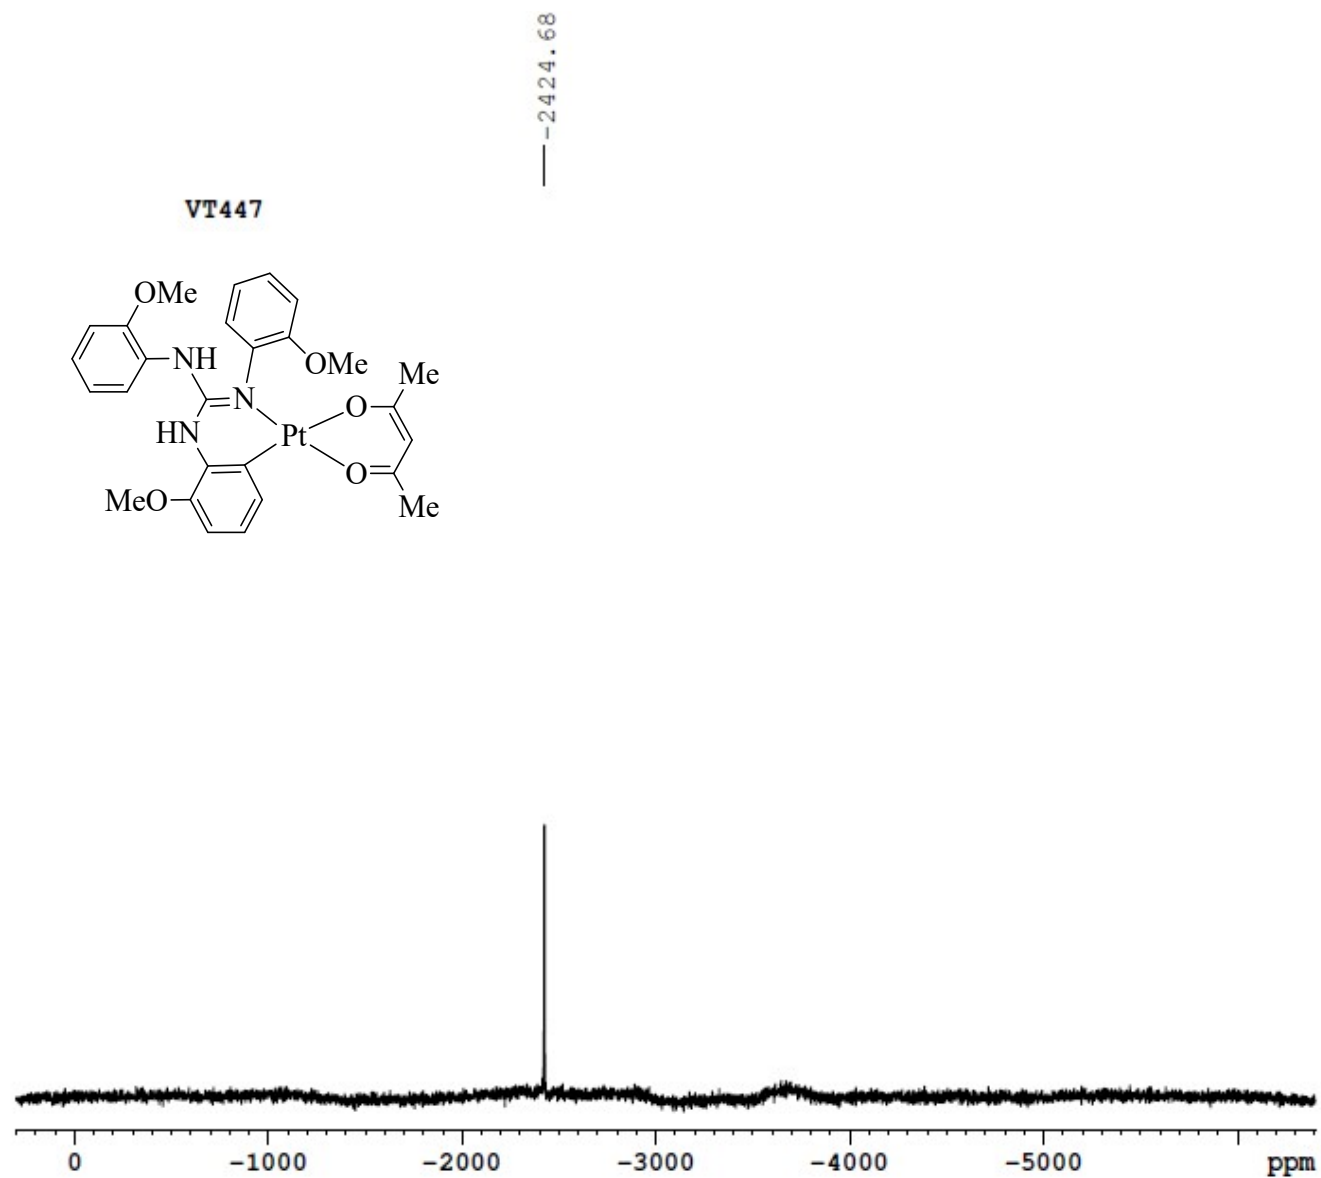

Fig. S80  $^{195}\text{Pt}\{^1\text{H}\}$  NMR ( $\text{CDCl}_3$ , 85.8 MHz) spectrum of **10**.

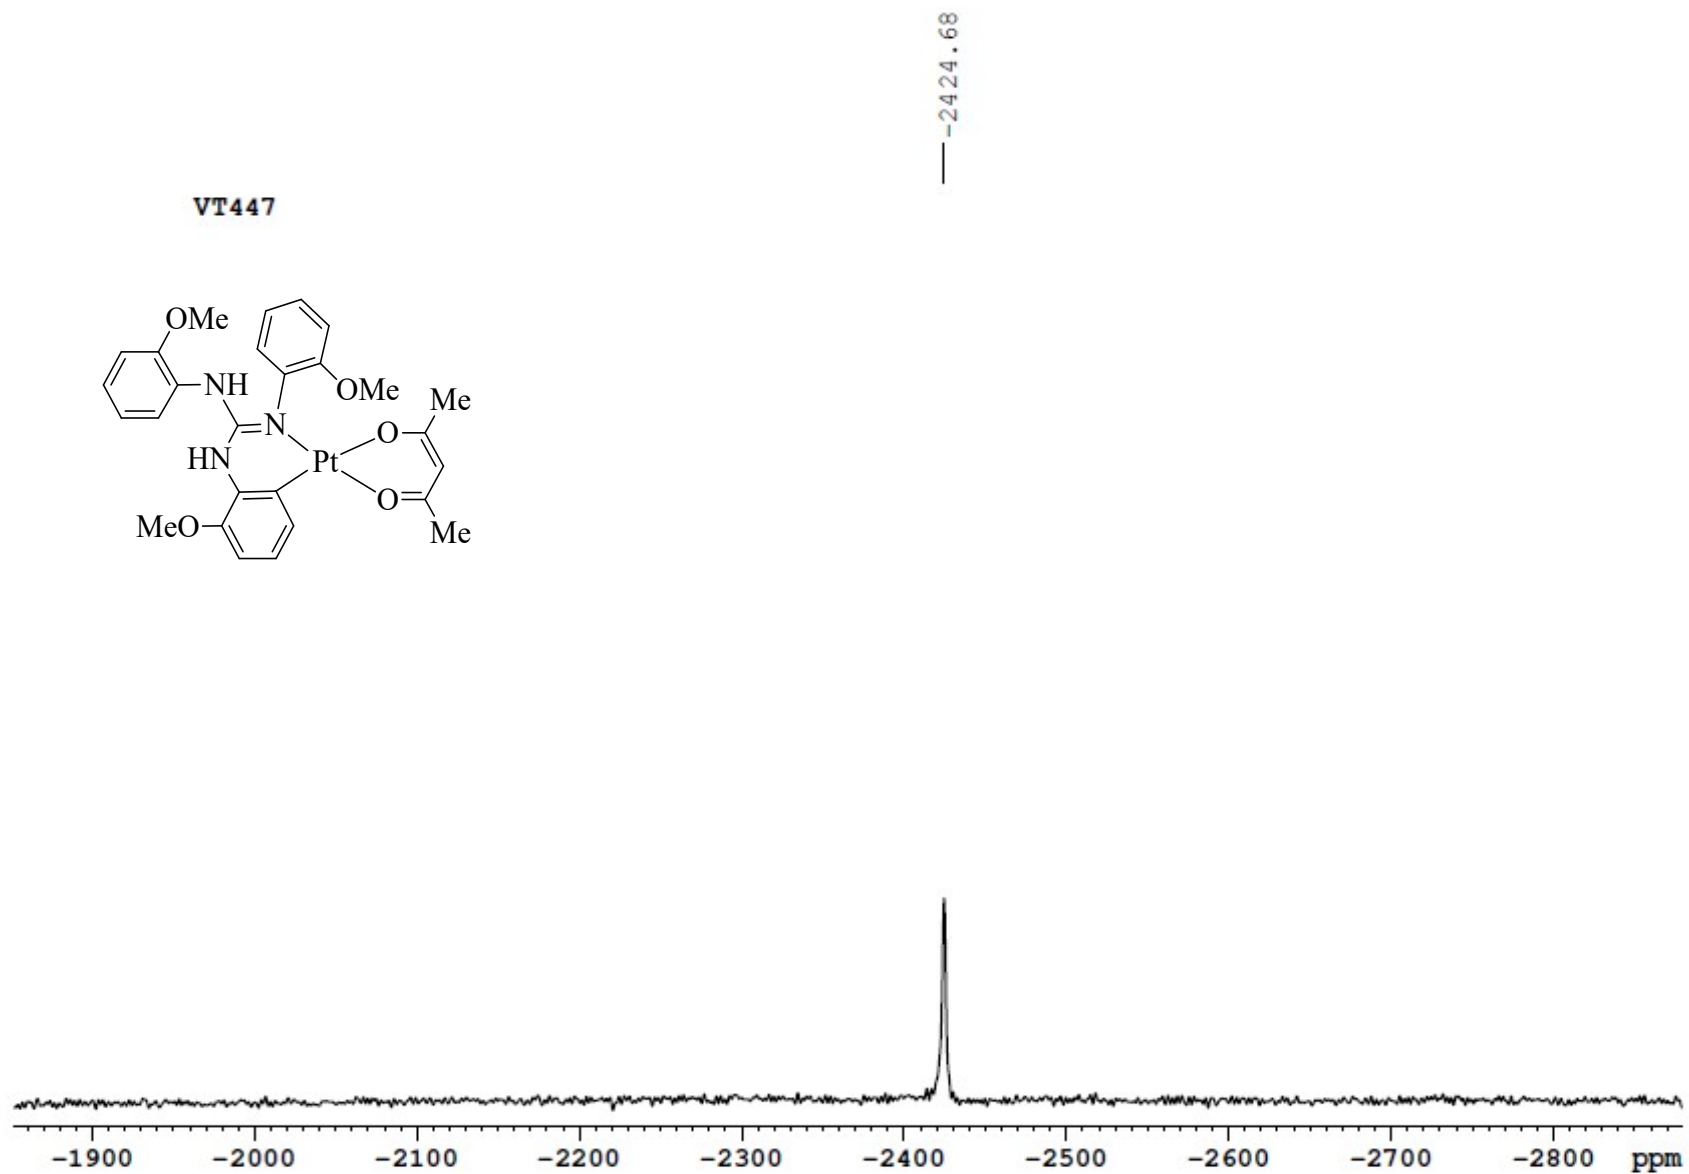

**Fig. S81**  $^{195}\text{Pt}\{^1\text{H}\}$  NMR ( $\text{CDCl}_3$ , 85.8 MHz) spectrum of **10** in the indicated region.

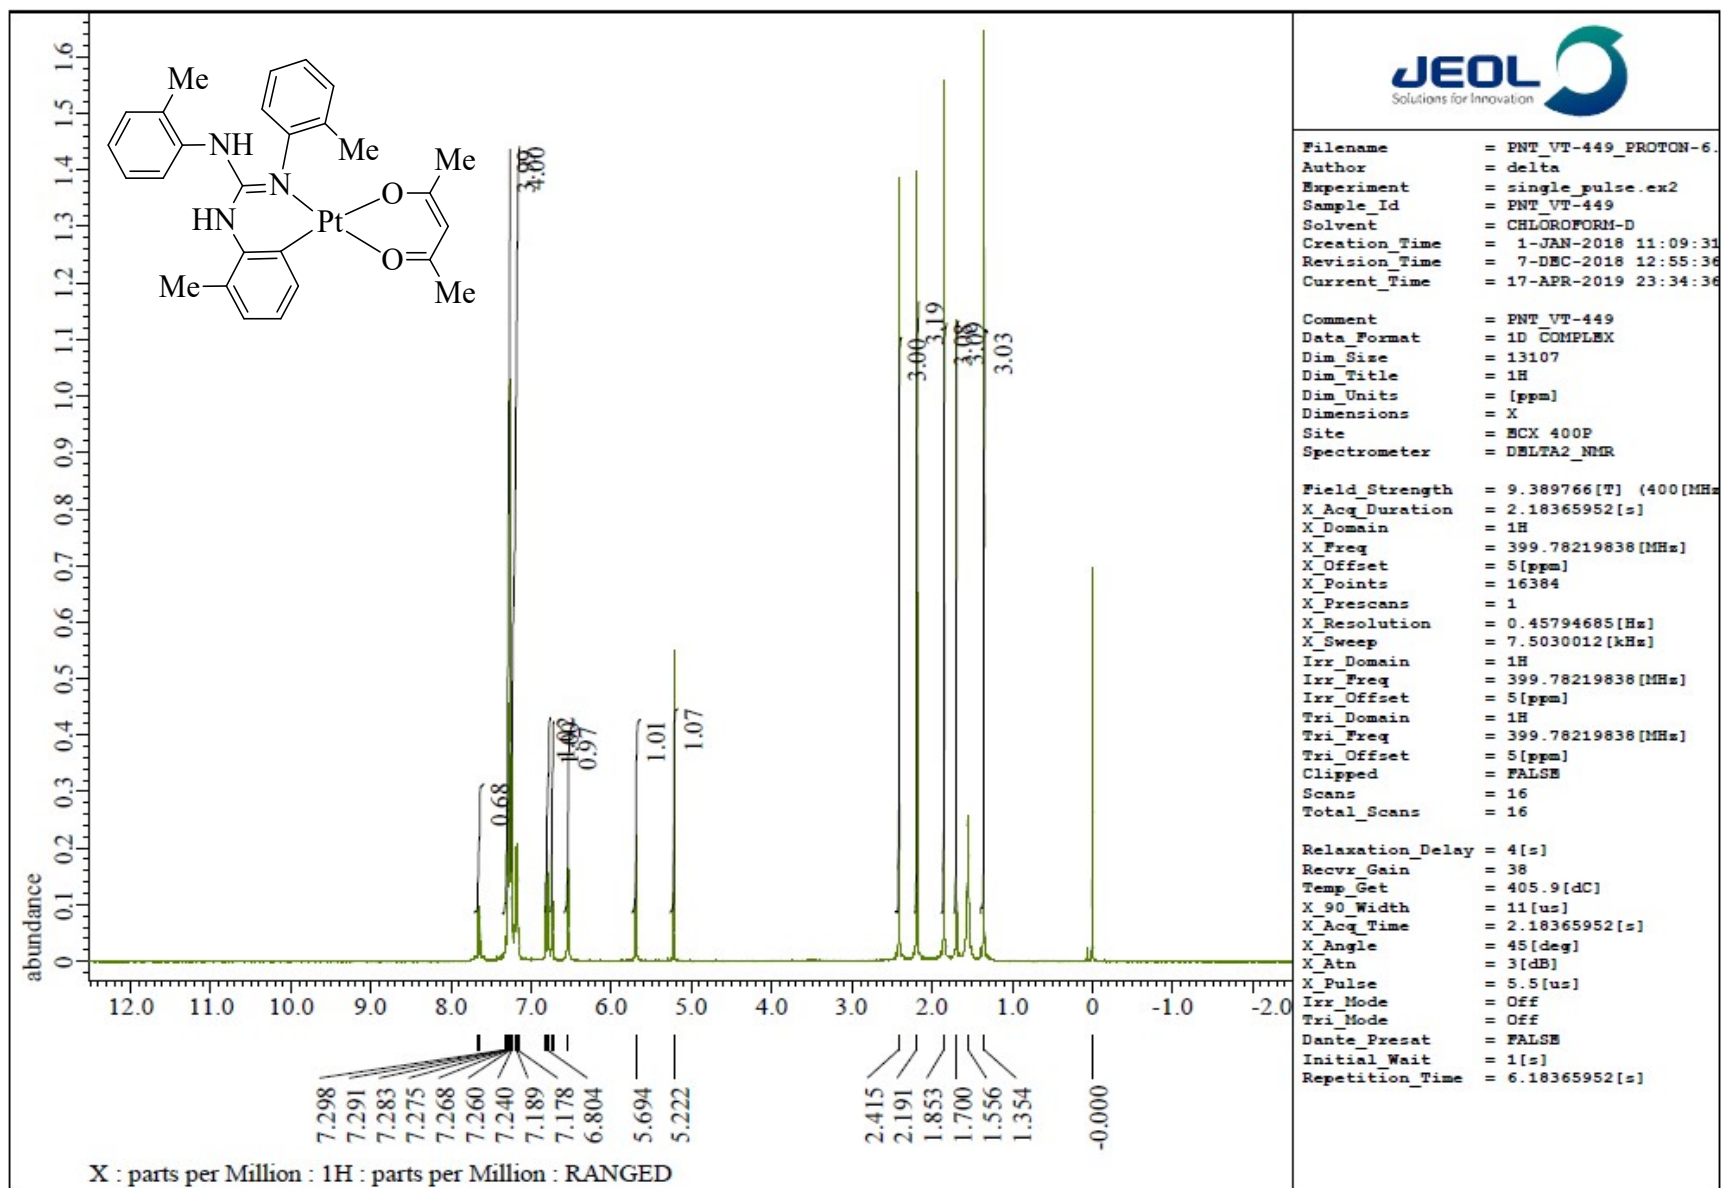

Fig. S82 <sup>1</sup>H NMR (CDCl<sub>3</sub>, 400 MHz) spectrum of 11.

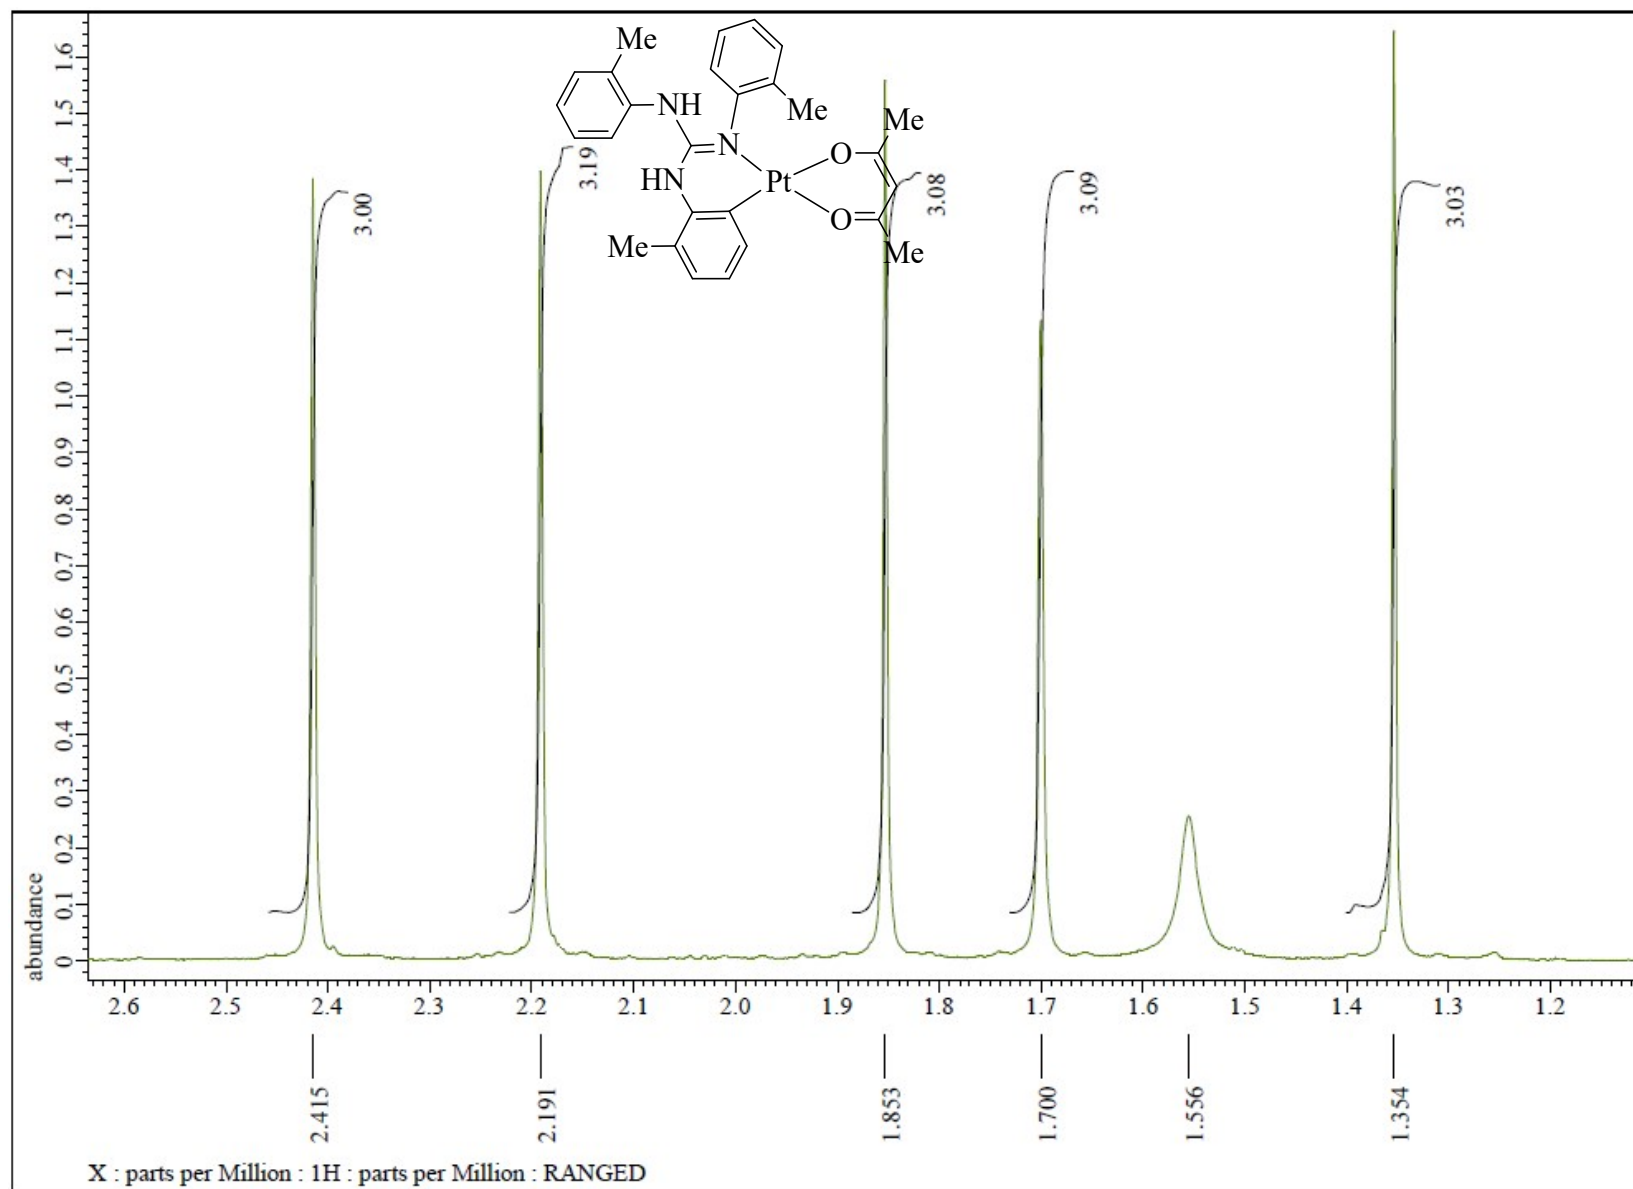

**Fig. S83**  $^1\text{H}$  NMR ( $\text{CDCl}_3$ , 400 MHz) spectrum of **11** in the indicated region.

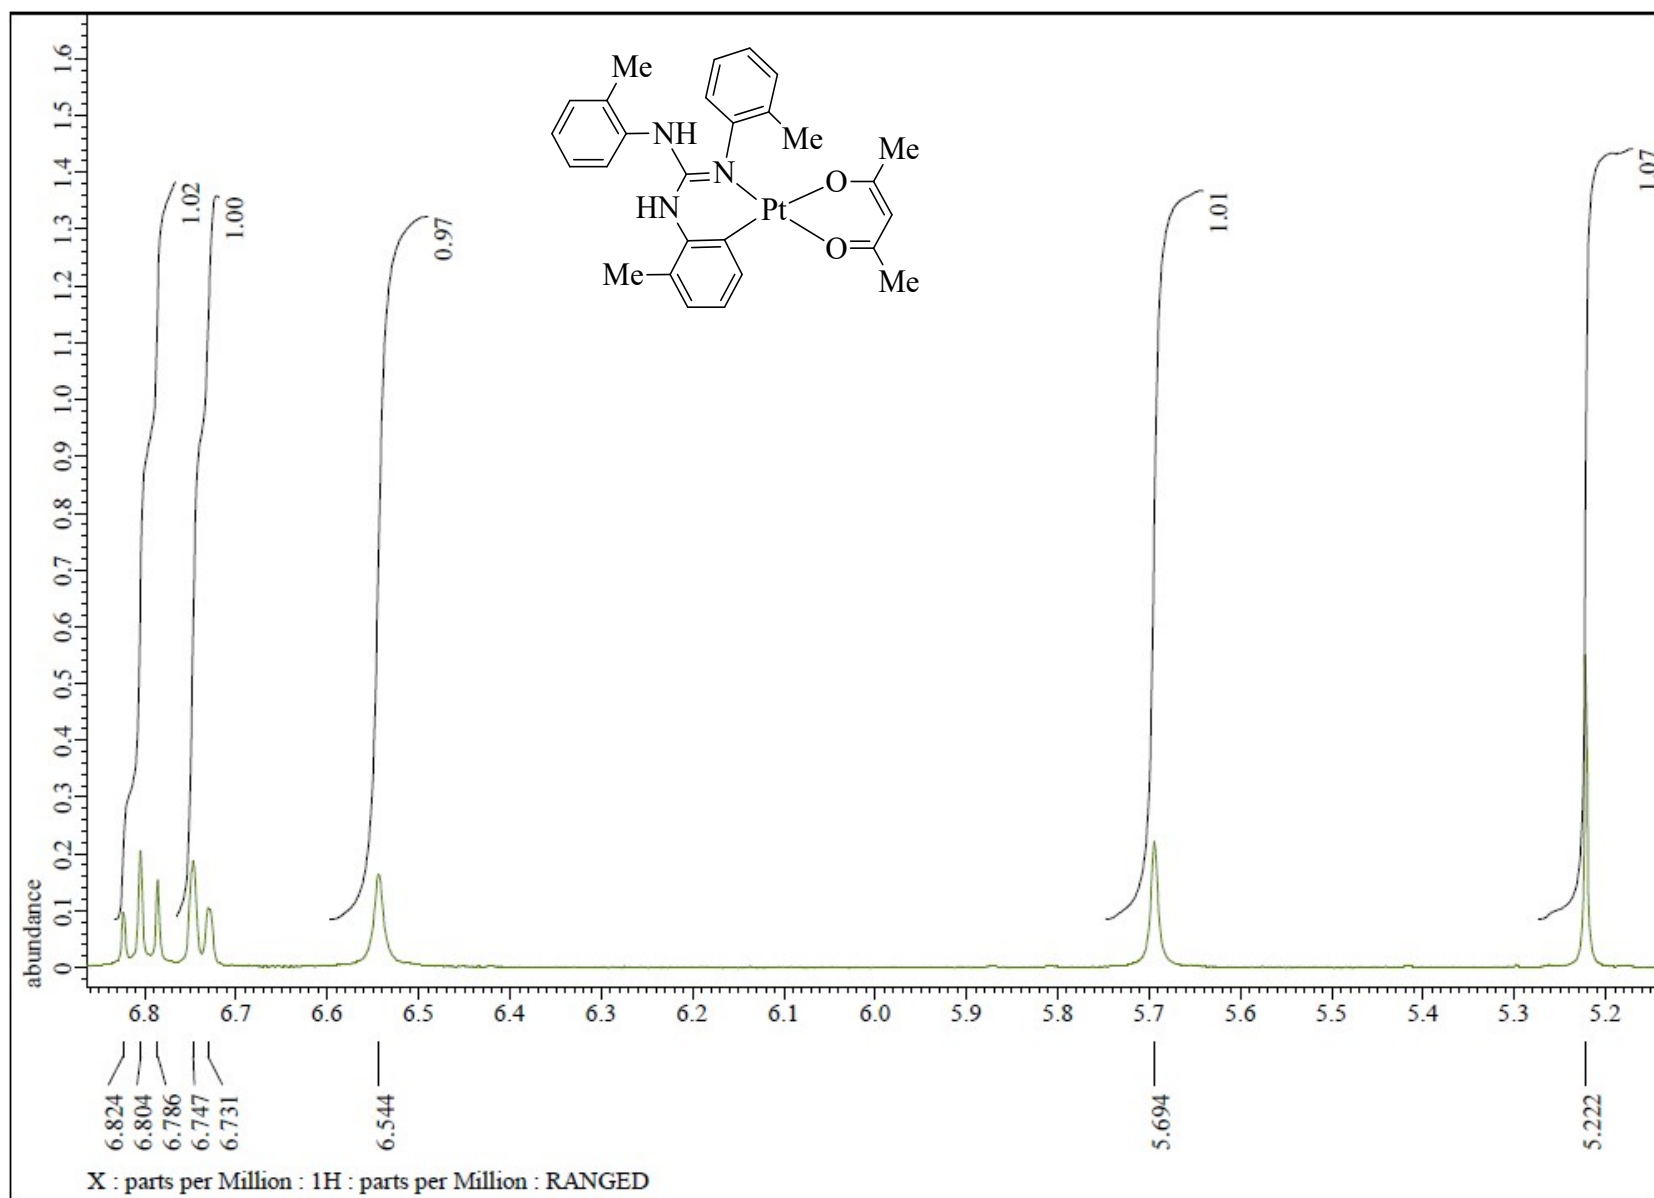

Fig. S84  $^1\text{H}$  NMR ( $\text{CDCl}_3$ , 400 MHz) spectrum of **11** in the indicated region.

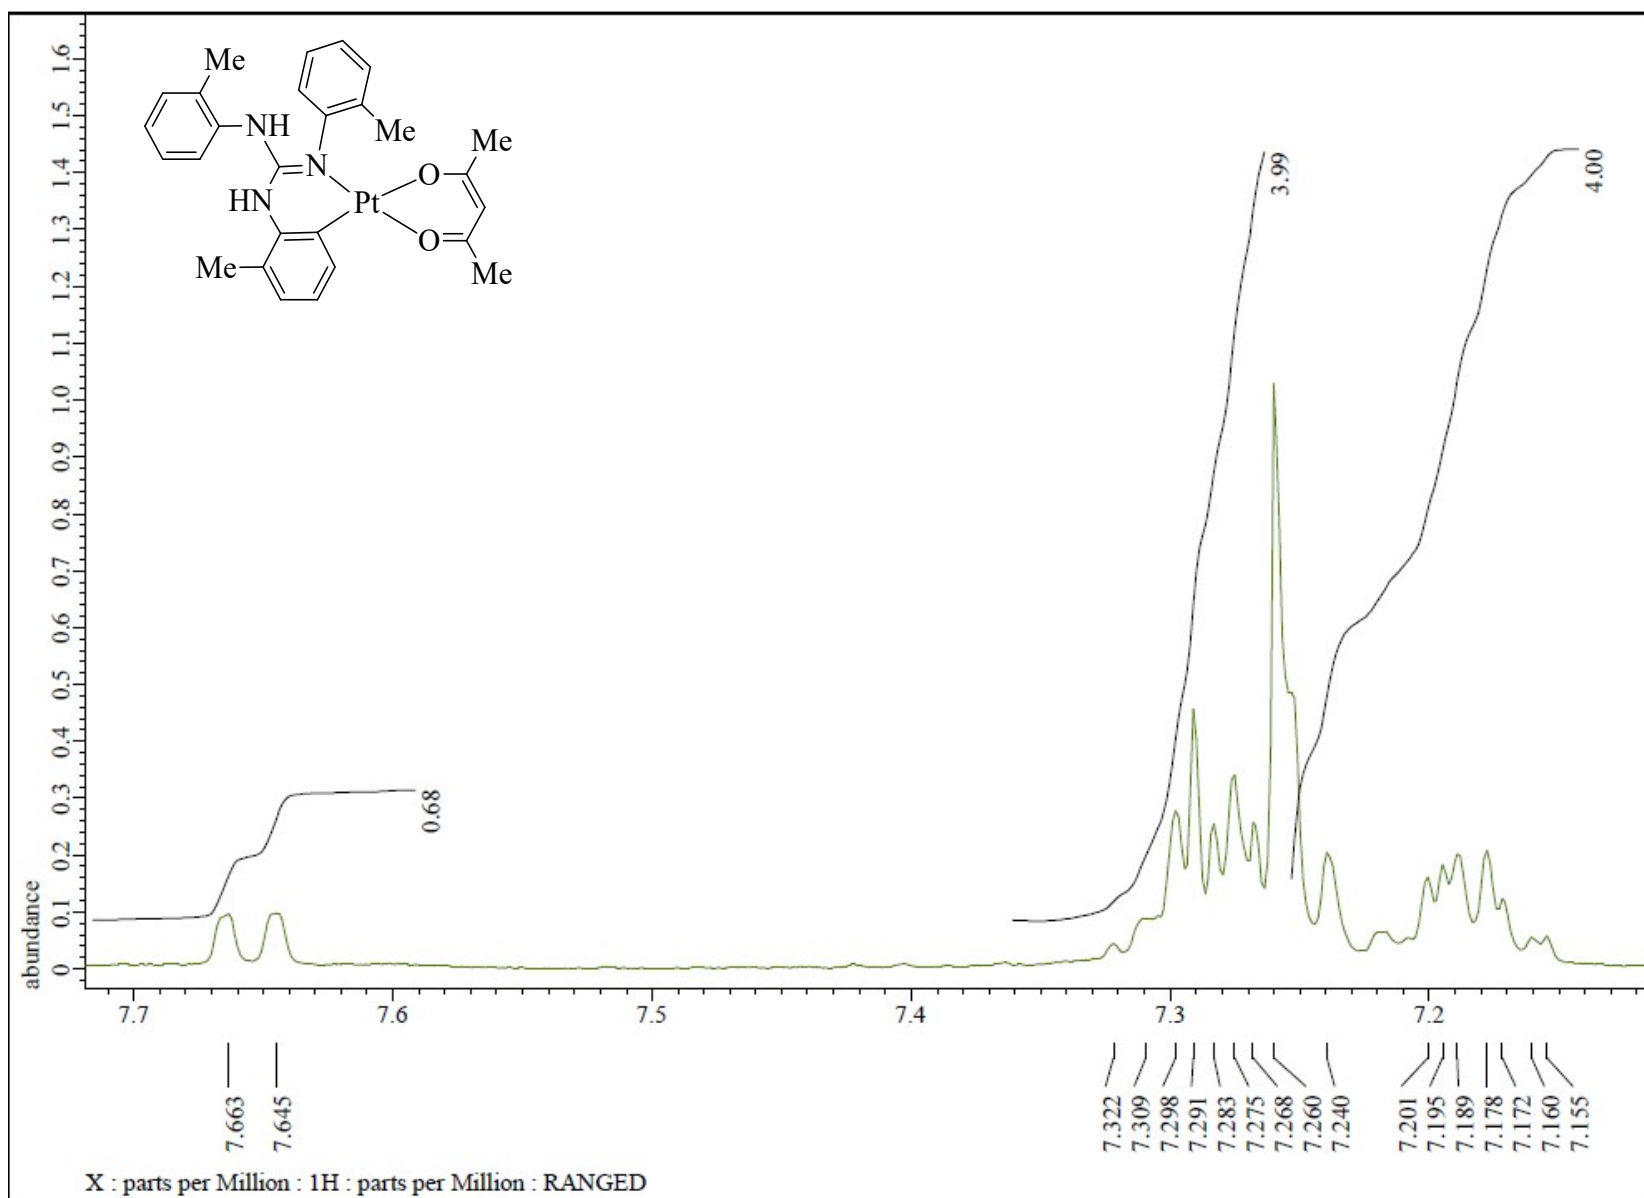

Fig. S85  $^1\text{H}$  NMR (CDCl<sub>3</sub>, 400 MHz) spectrum of **11** in the indicated region.

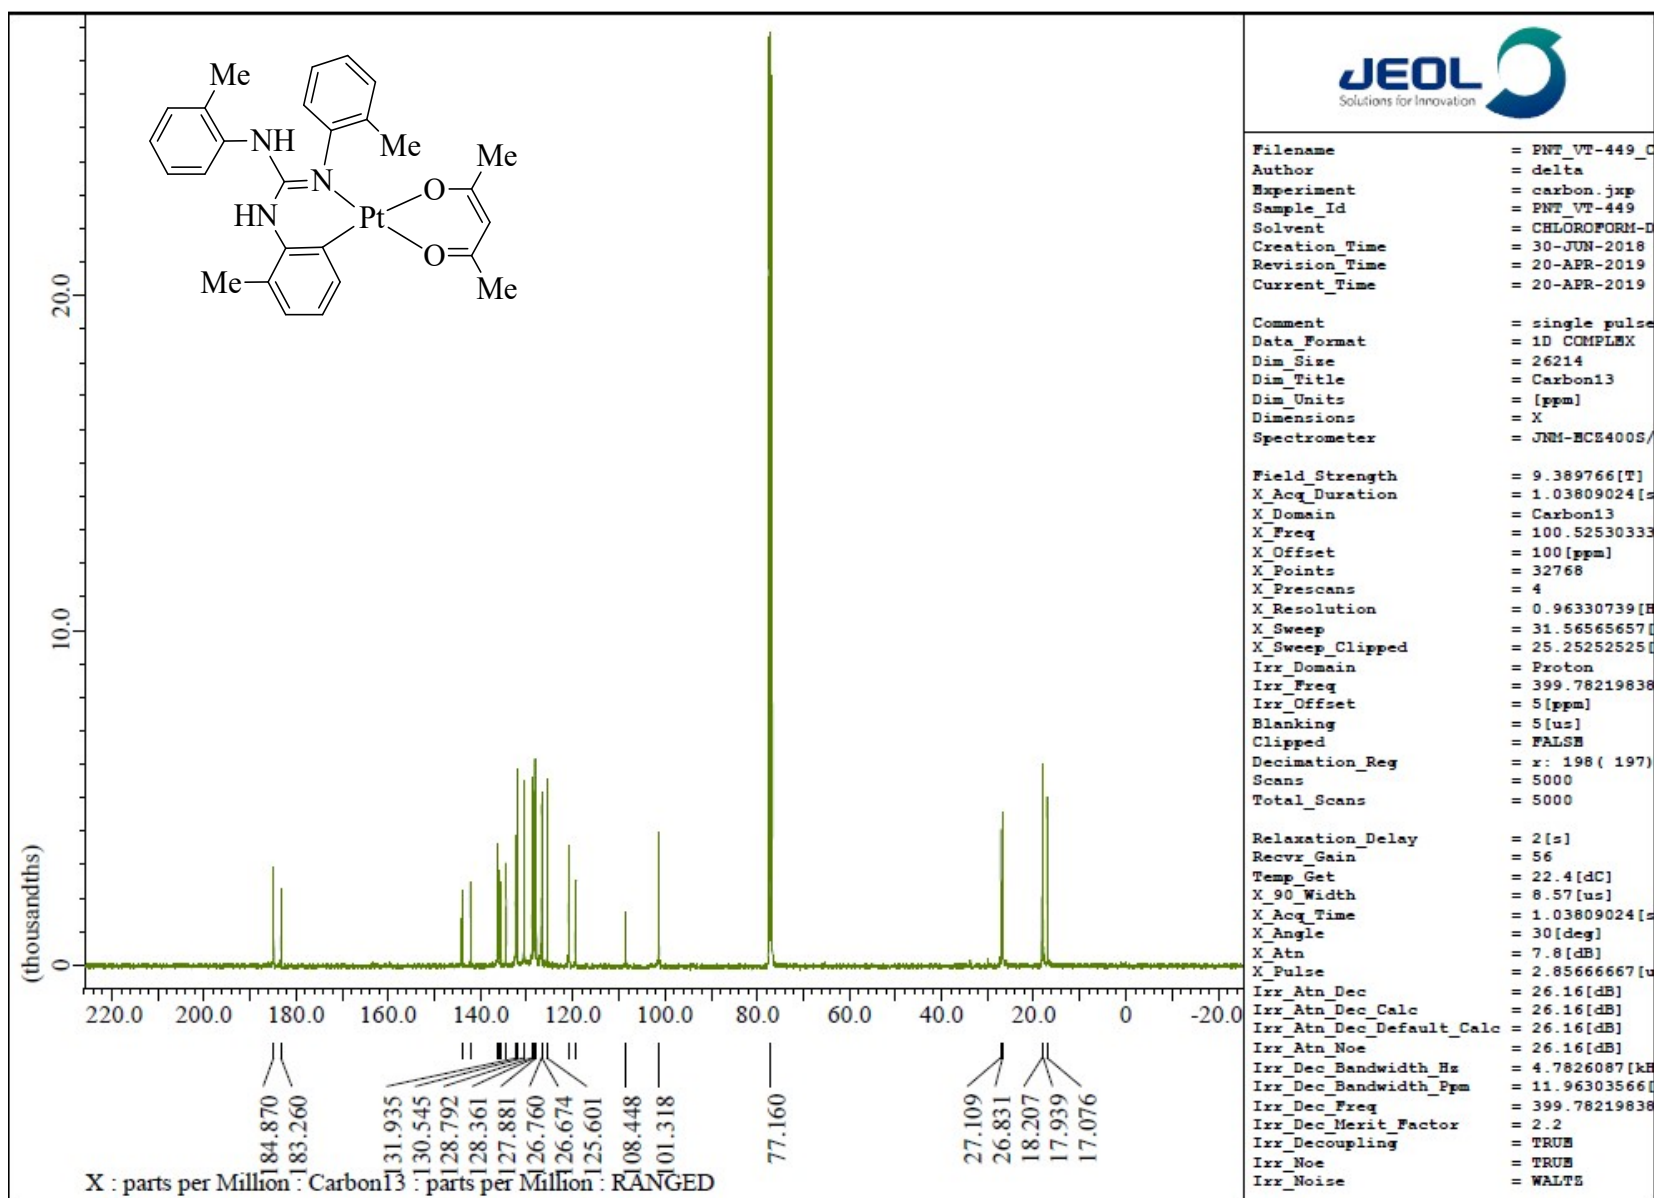

Fig. S86 <sup>13</sup>C {<sup>1</sup>H} NMR (CDCl<sub>3</sub>, 100.5 MHz) spectrum of 11.



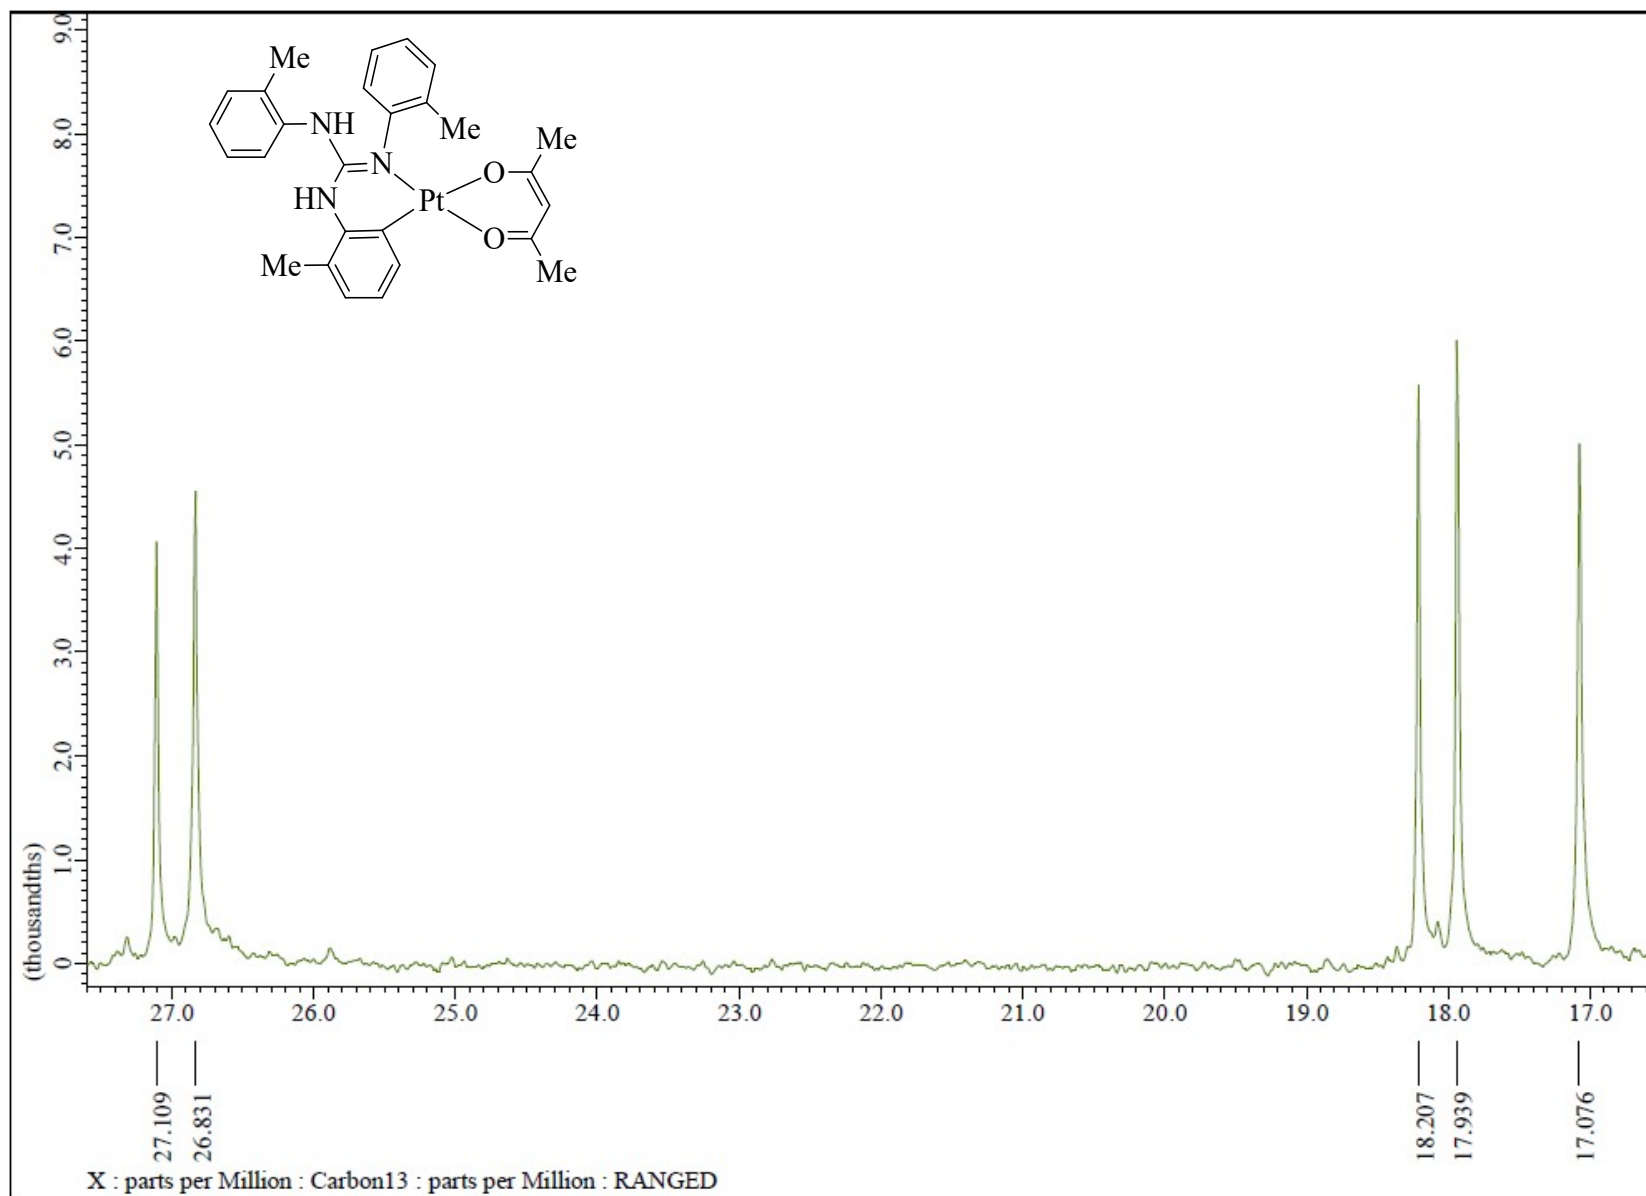

Fig. S87  $^{13}\text{C}\{^1\text{H}\}$  NMR ( $\text{CDCl}_3$ , 100.5 MHz) spectrum of **11** in the indicated region.

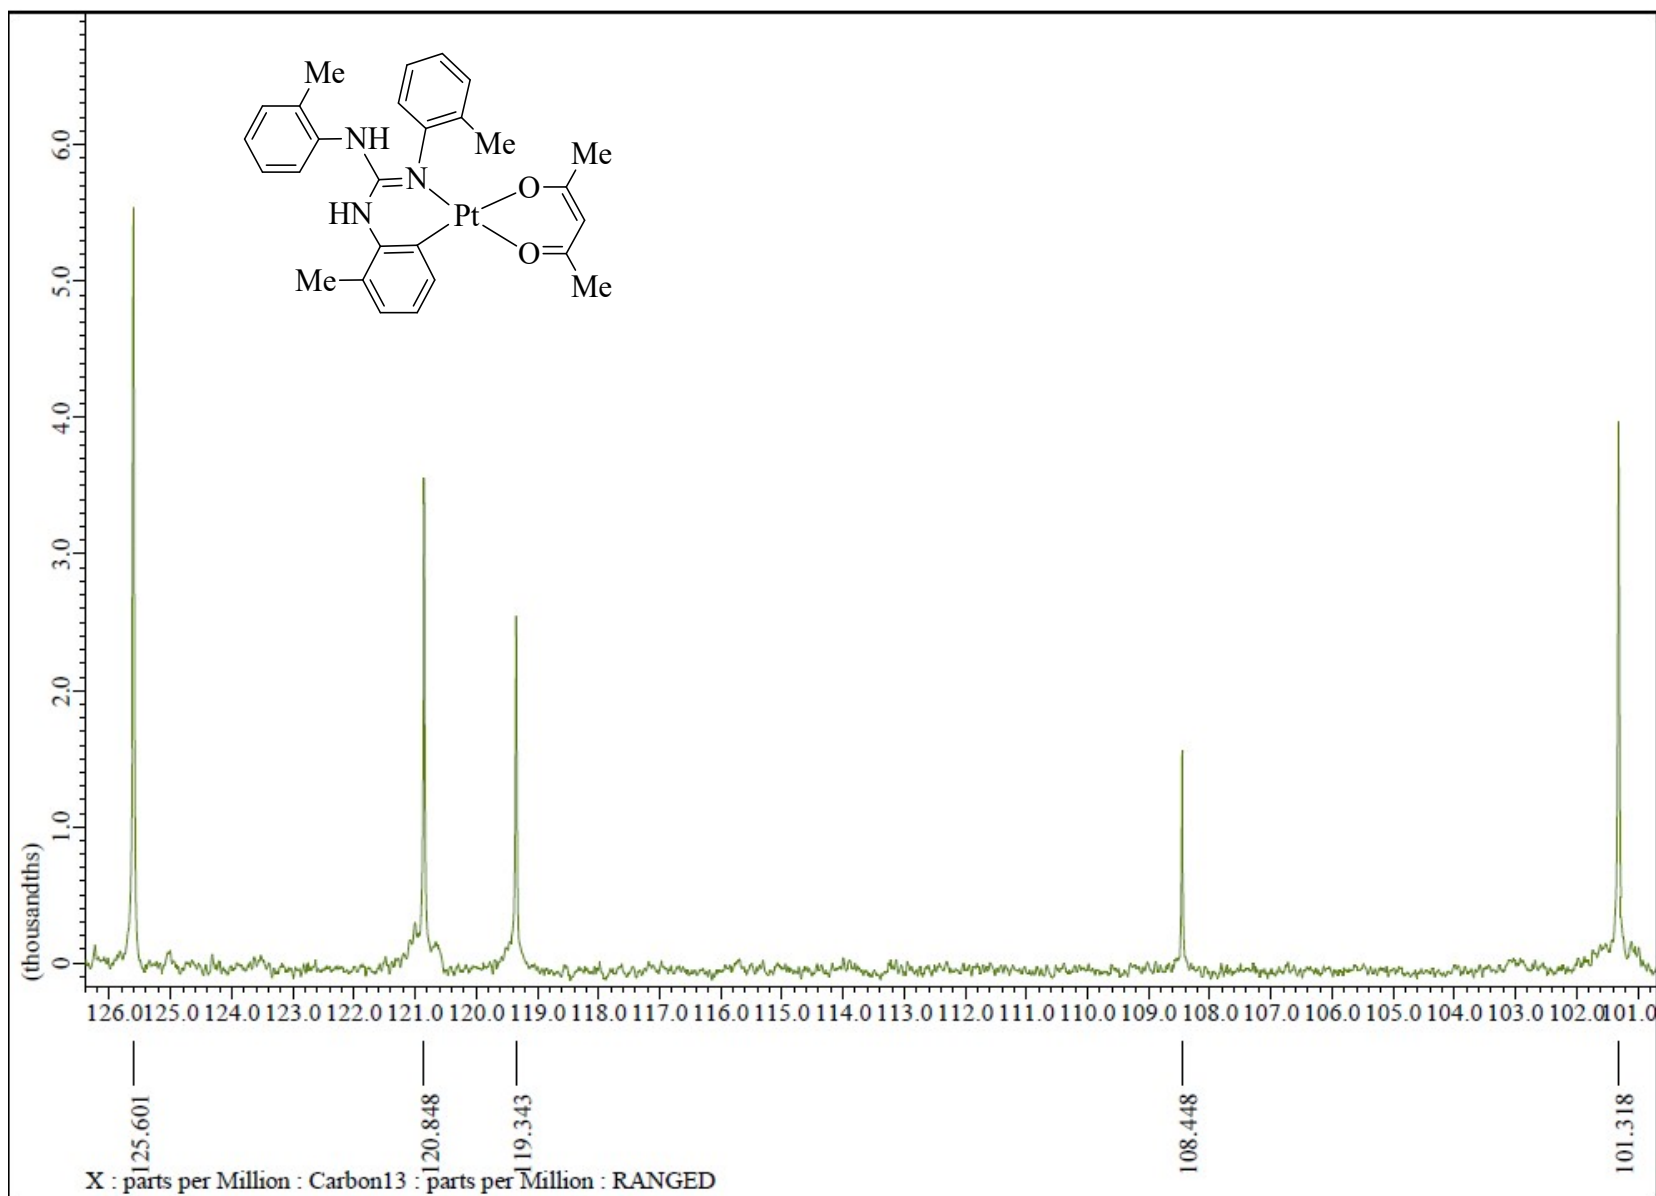

Fig. S88  $^{13}\text{C}\{^1\text{H}\}$  NMR ( $\text{CDCl}_3$ , 100.5 MHz) spectrum of **11** in the indicated region.

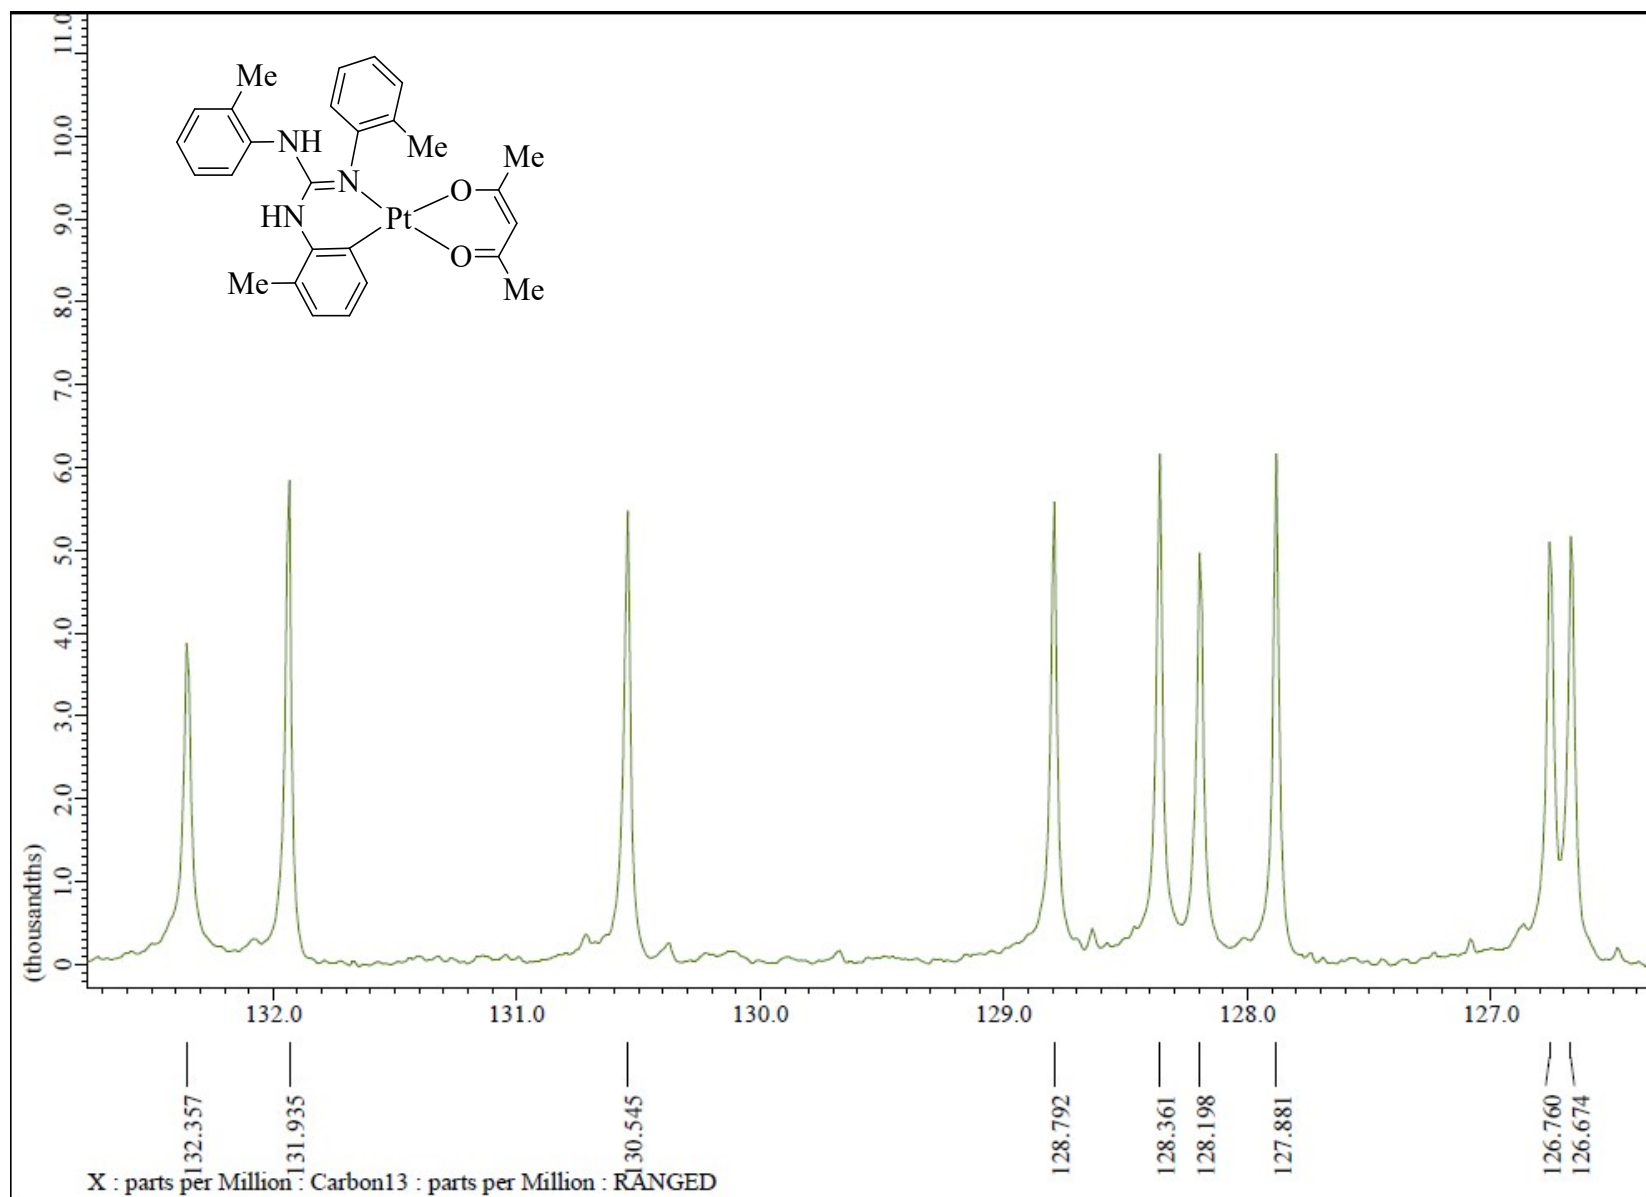

Fig. S89  $^{13}\text{C}\{^1\text{H}\}$  NMR (CDCl<sub>3</sub>, 100.5 MHz) spectrum of **11** in the indicated region.

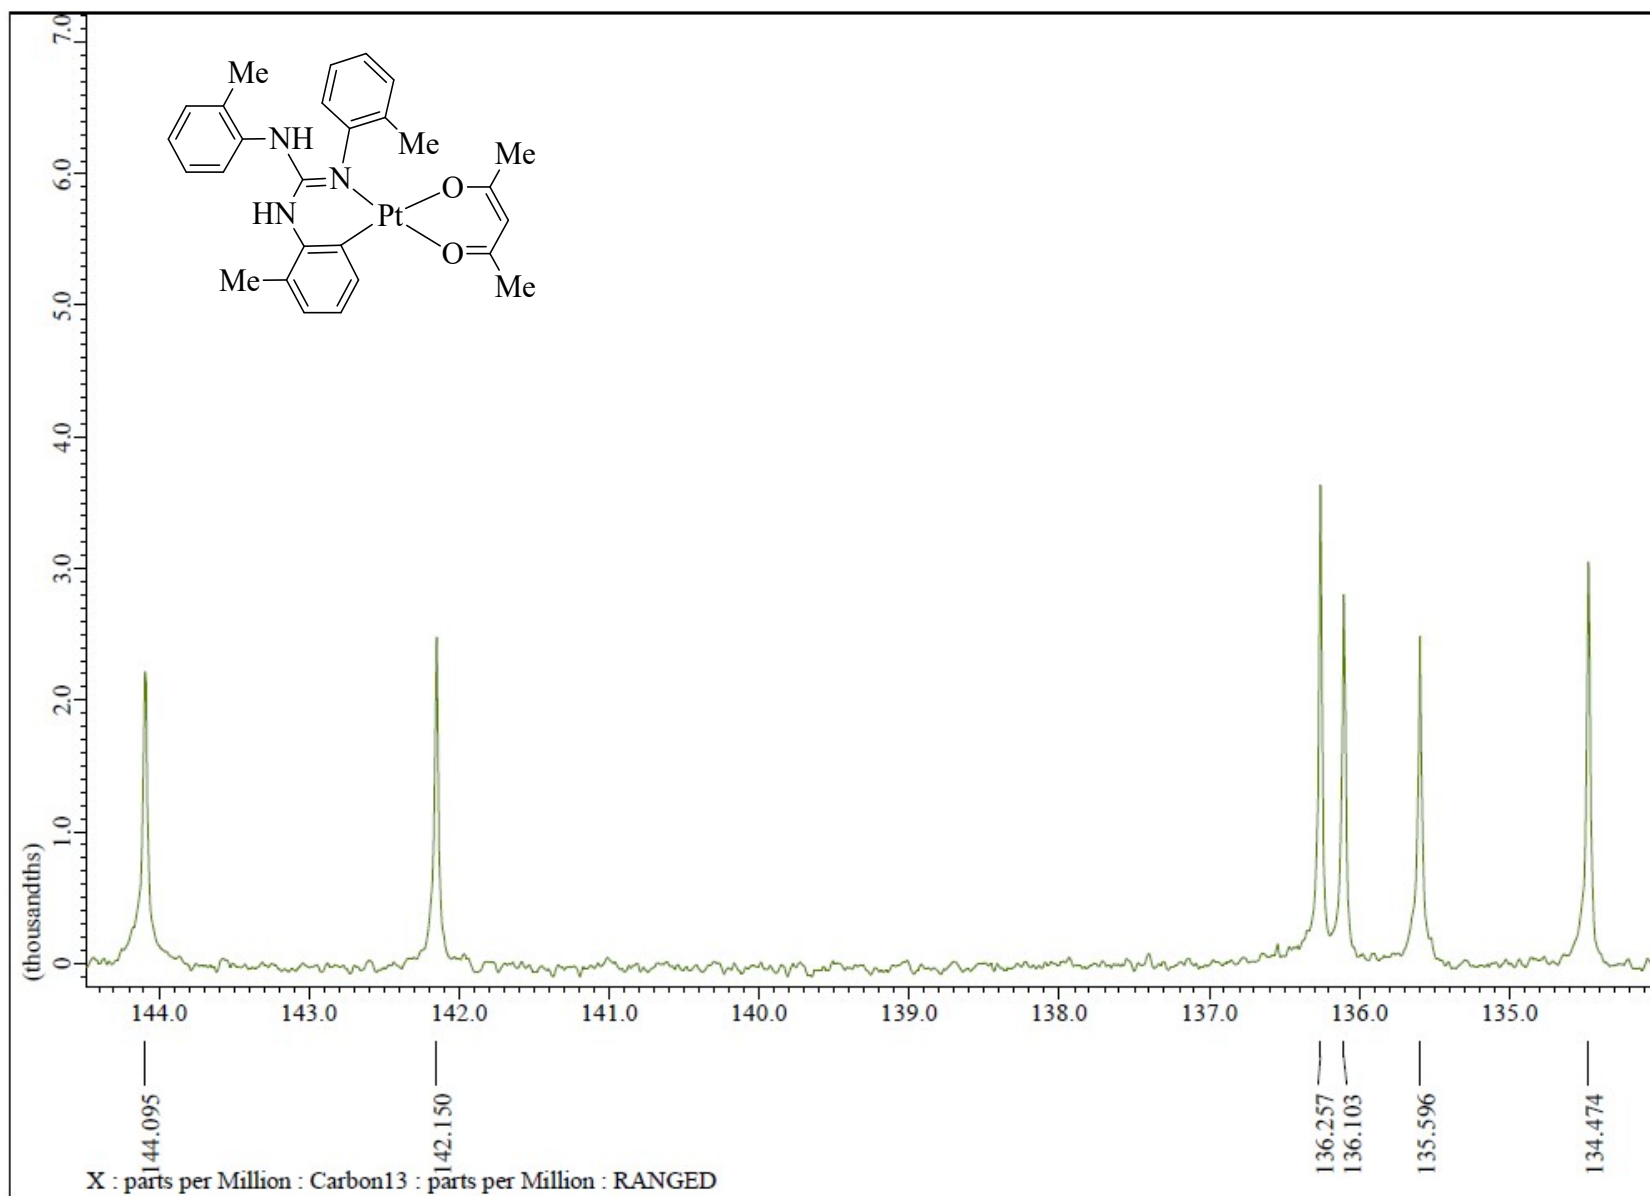

Fig. S90  $^{13}\text{C}\{^1\text{H}\}$  NMR (CDCl<sub>3</sub>, 100.5 MHz) spectrum of **11** in the indicated region.

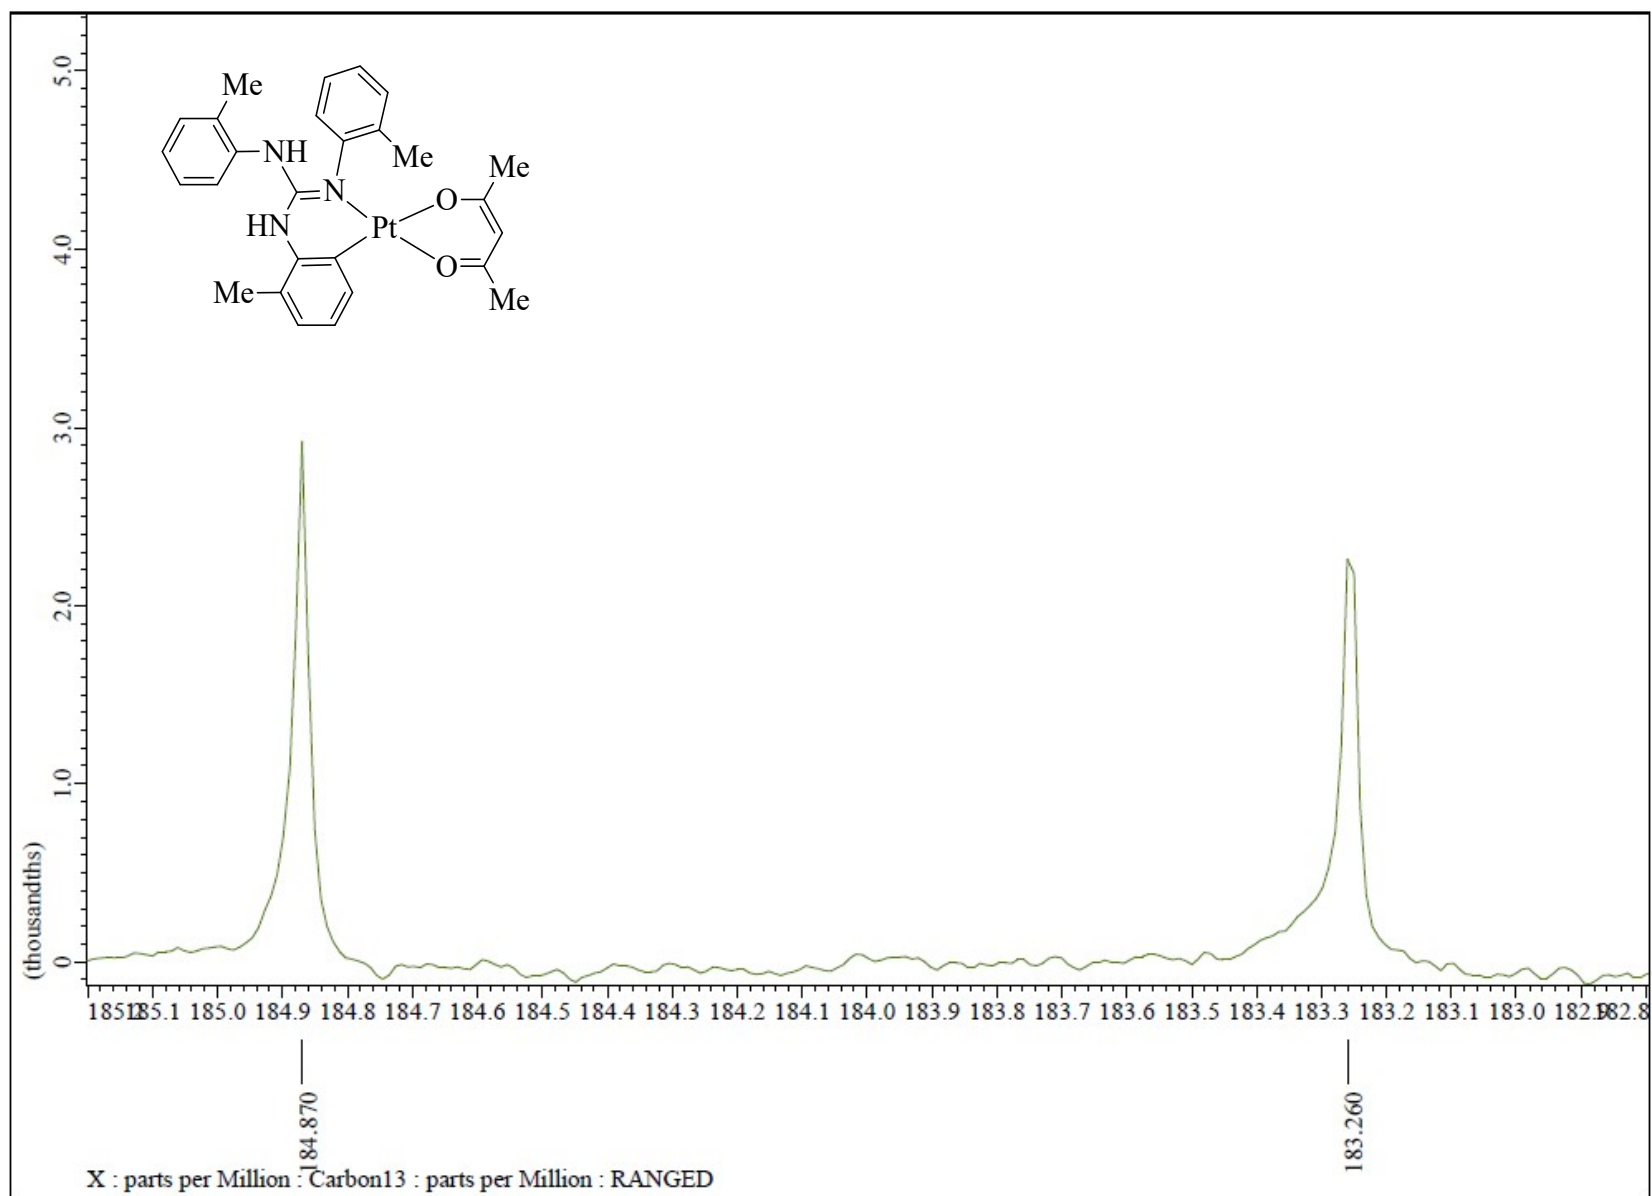

Fig. S91  $^{13}\text{C}\{^1\text{H}\}$  NMR ( $\text{CDCl}_3$ , 100.5 MHz) spectrum of **11** in the indicated region.

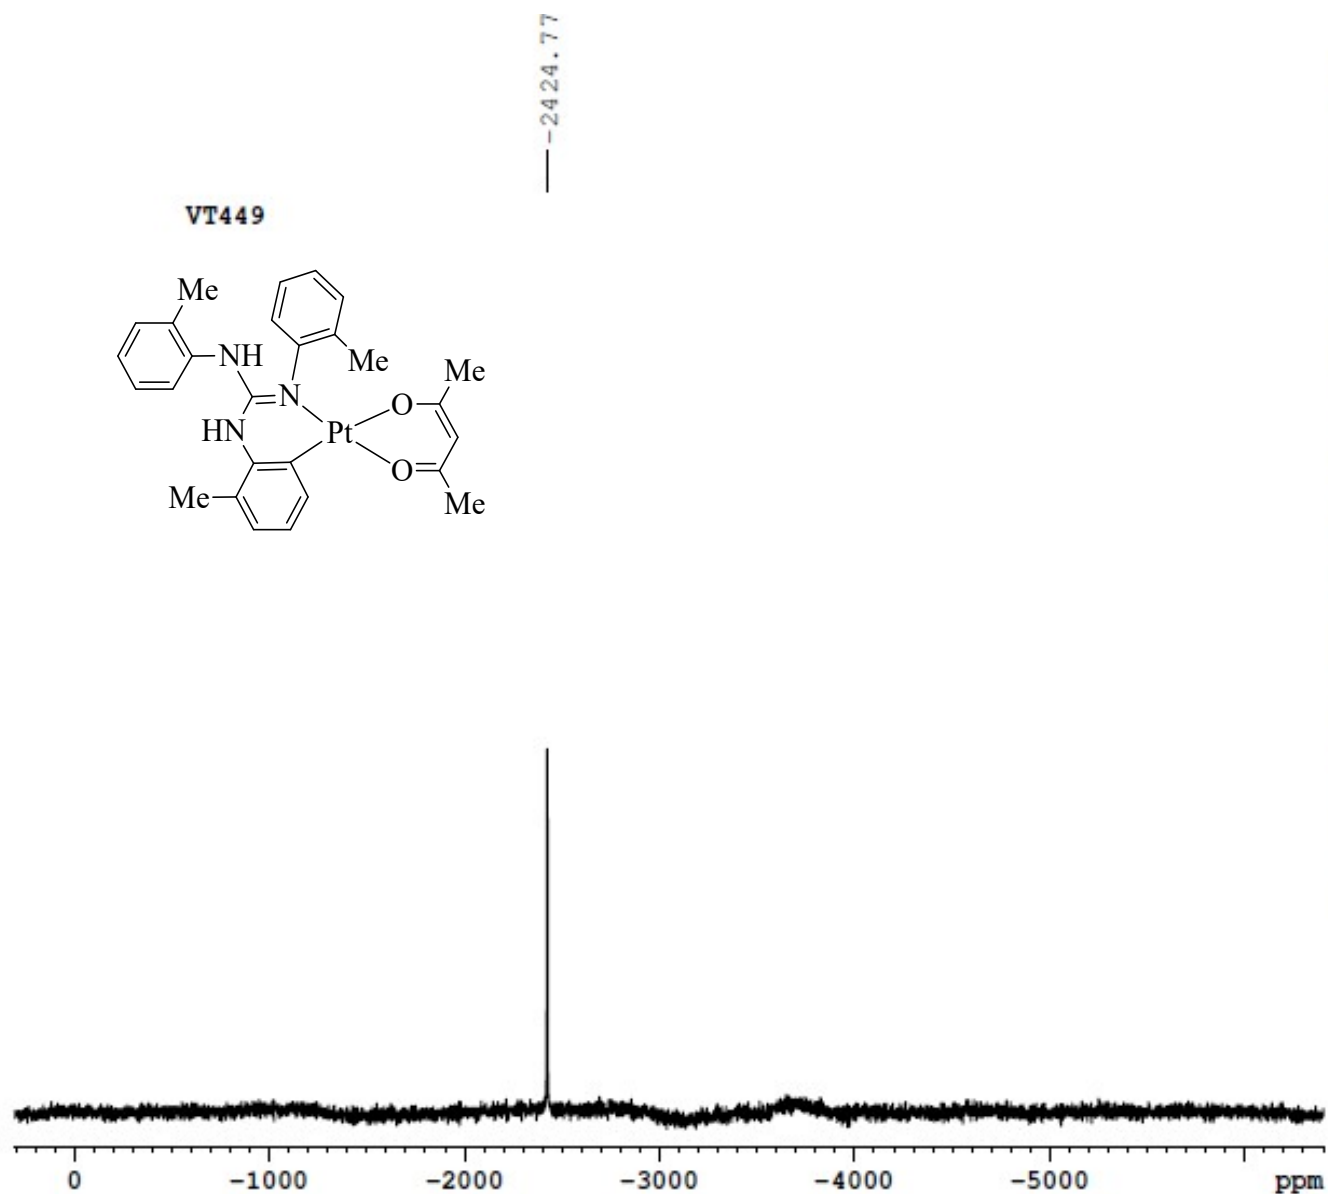

Current Data Parameters  
 NAME 11\_Tirupati  
 EXPNO 6  
 PROCNO 1

F2 - Acquisition Parameters  
 Date\_ 20170712  
 Time 10.12  
 INSTRUM spect  
 PROBHD 5 mm PABBO BB-  
 PULPROG zg  
 TD 5710  
 SOLVENT CDCl3  
 NS 1024  
 DS 0  
 SWH 576923.063 Hz  
 FIDRES 101.037315 Hz  
 AQ 0.0049487 sec  
 RG 18  
 DW 0.867 usec  
 DE 6.50 usec  
 TE 298.1 K  
 D1 1.00000000 sec  
 TDO 1

===== CHANNEL f1 =====  
 NUC1 195Pt  
 P1 9.50 usec  
 PL1 -2.00 dB  
 PL1W 48.79838562 W  
 SFO1 85.7741674 MHz

F2 - Processing parameters  
 SI 32768  
 SF 86.0365790 MHz  
 WDW EM  
 SSB 0  
 LB 1.00 Hz  
 GB 0  
 PC 1.00

Fig. S92  $^{195}\text{Pt}\{^1\text{H}\}$  NMR ( $\text{CDCl}_3$ , 85.8 MHz) spectrum of **11**.

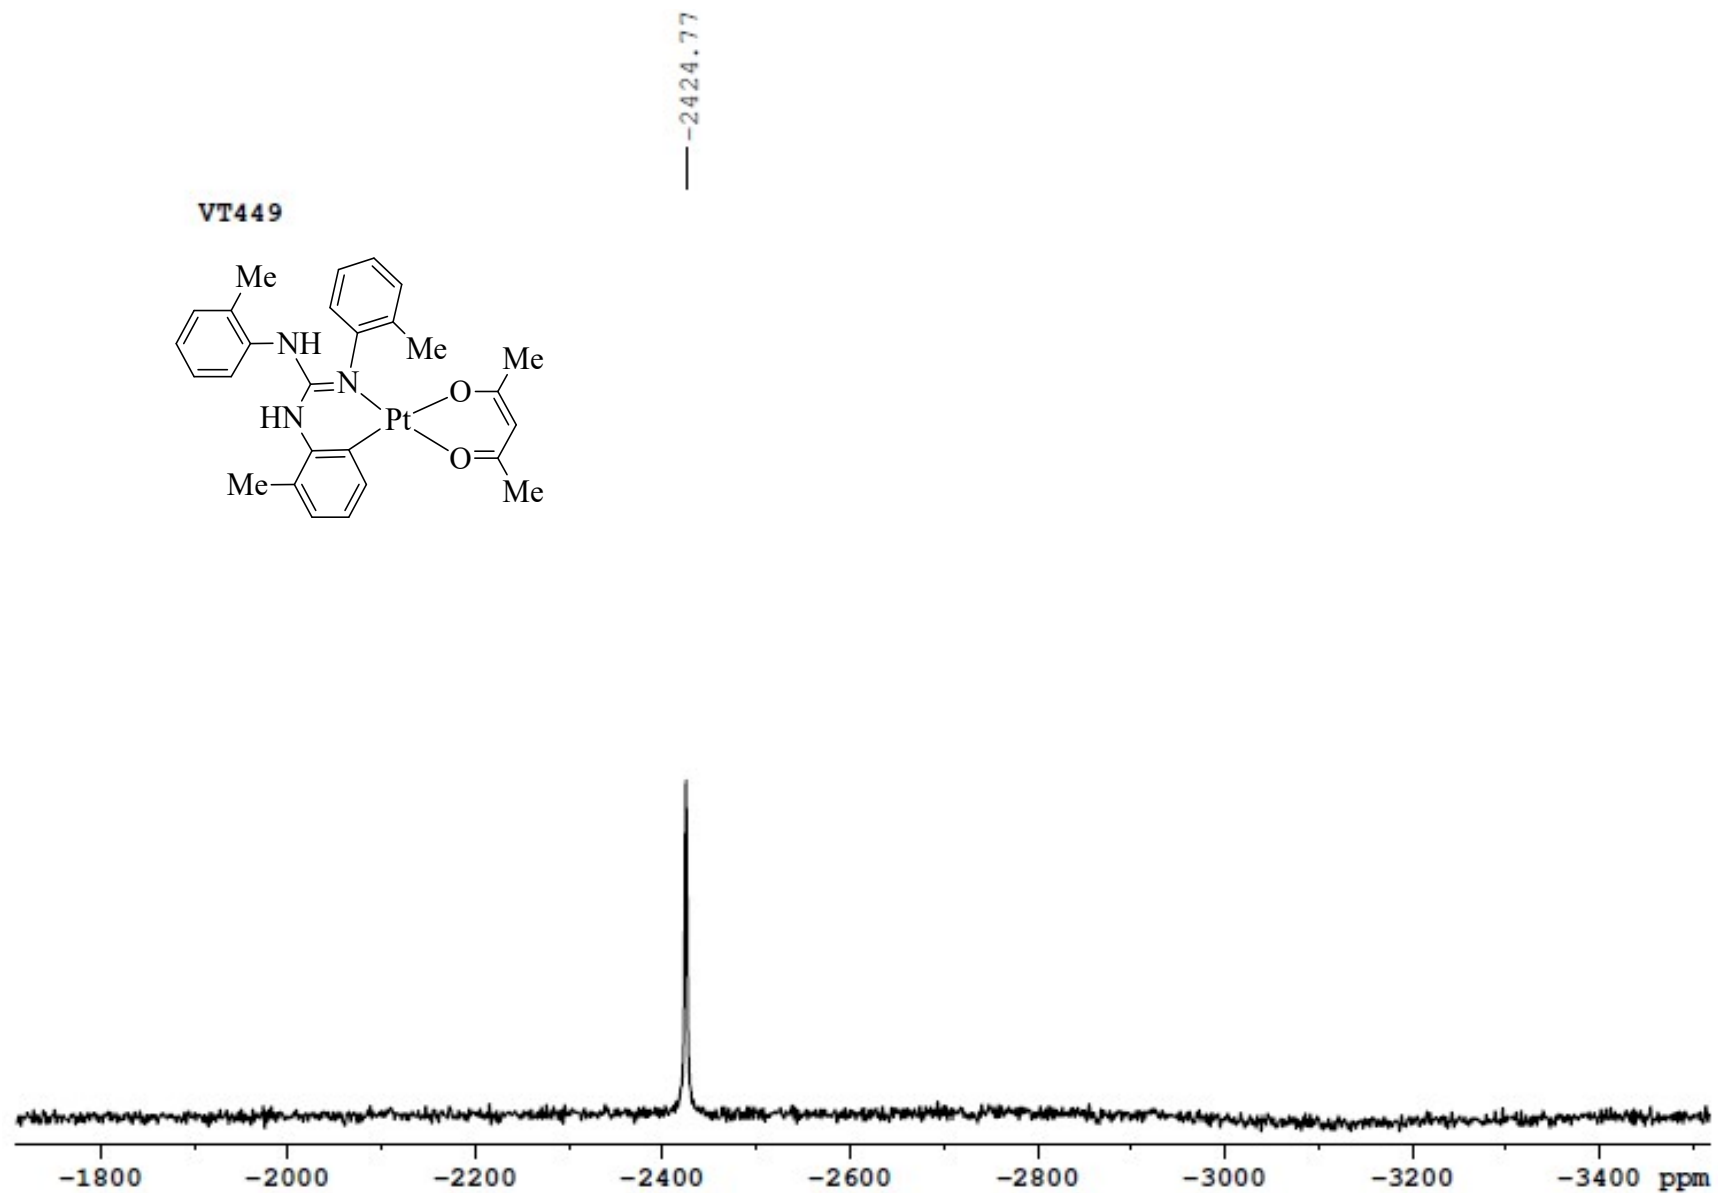

Fig. S93  $^{195}\text{Pt}\{^1\text{H}\}$  NMR ( $\text{CDCl}_3$ , 85.8 MHz) spectrum of **11** in the indicated region.

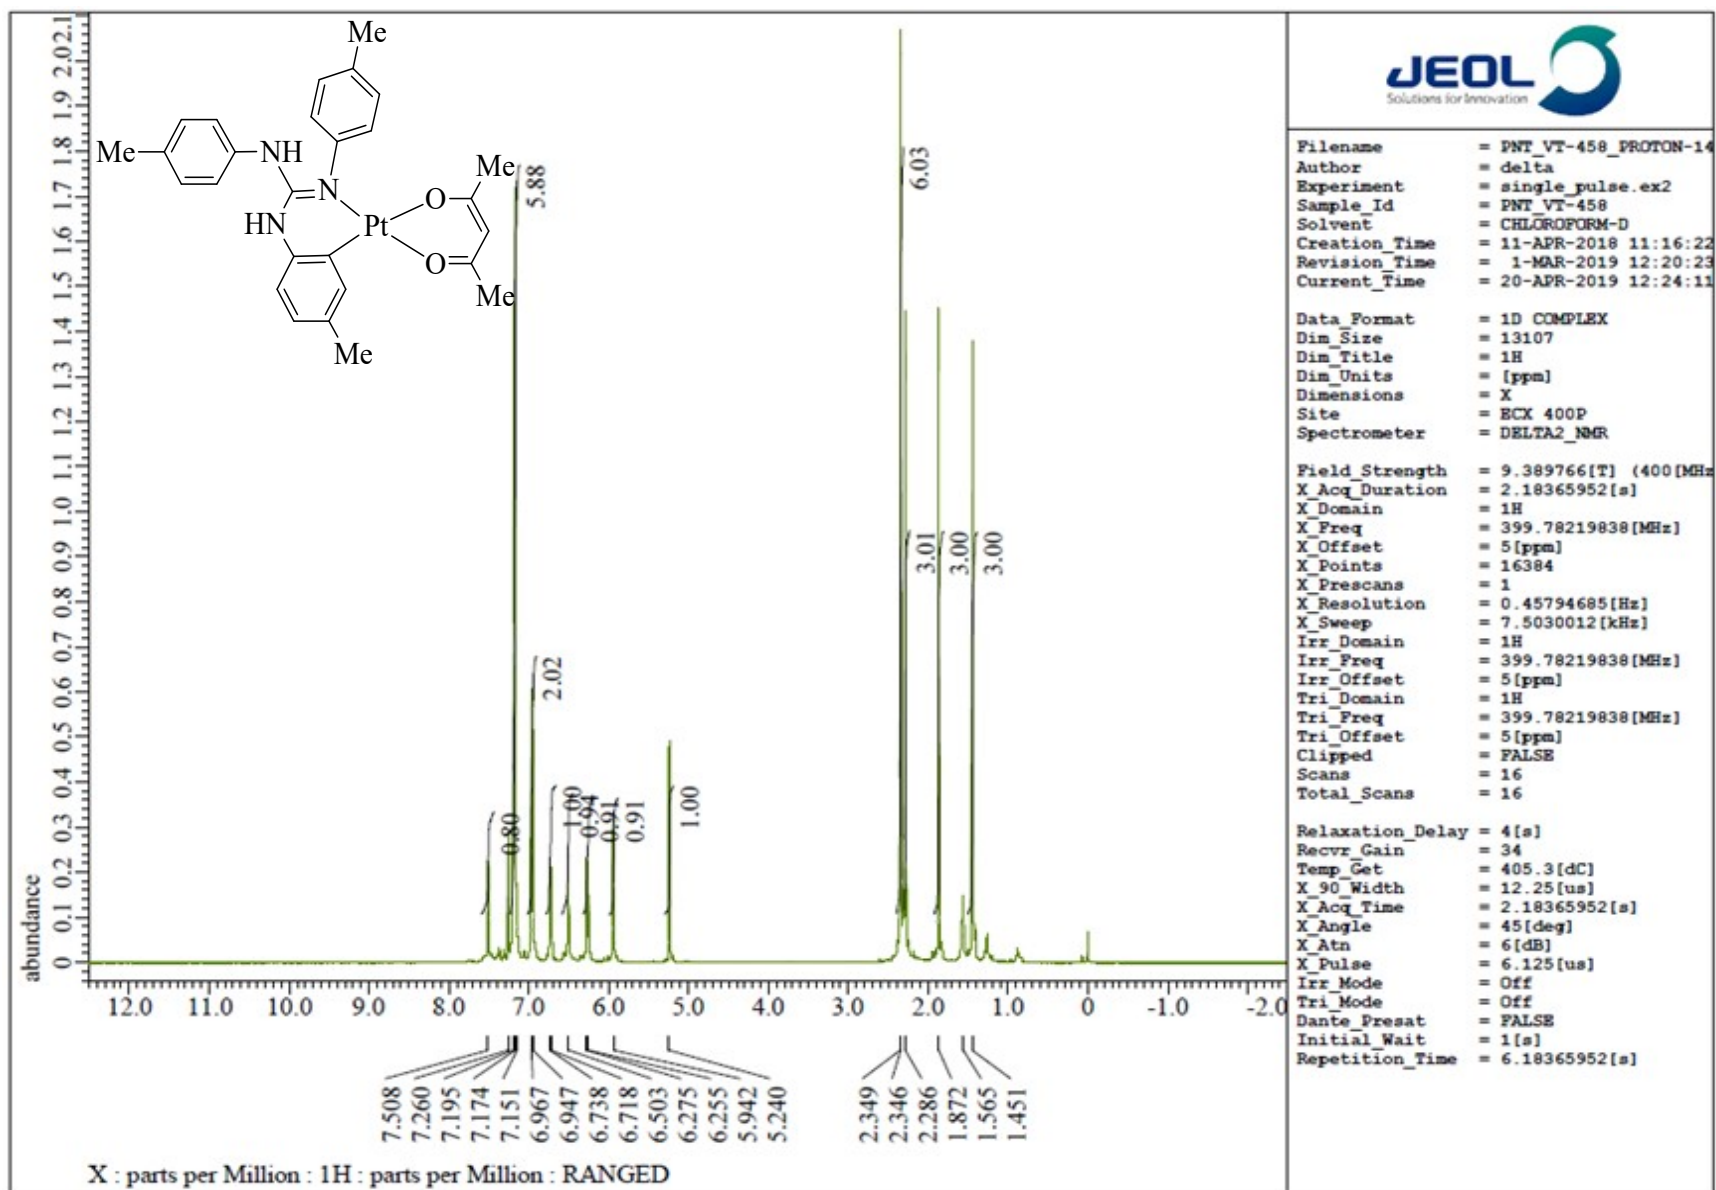

Fig. S94 <sup>1</sup>H NMR (CDCl<sub>3</sub>, 400 MHz) spectrum of 12.



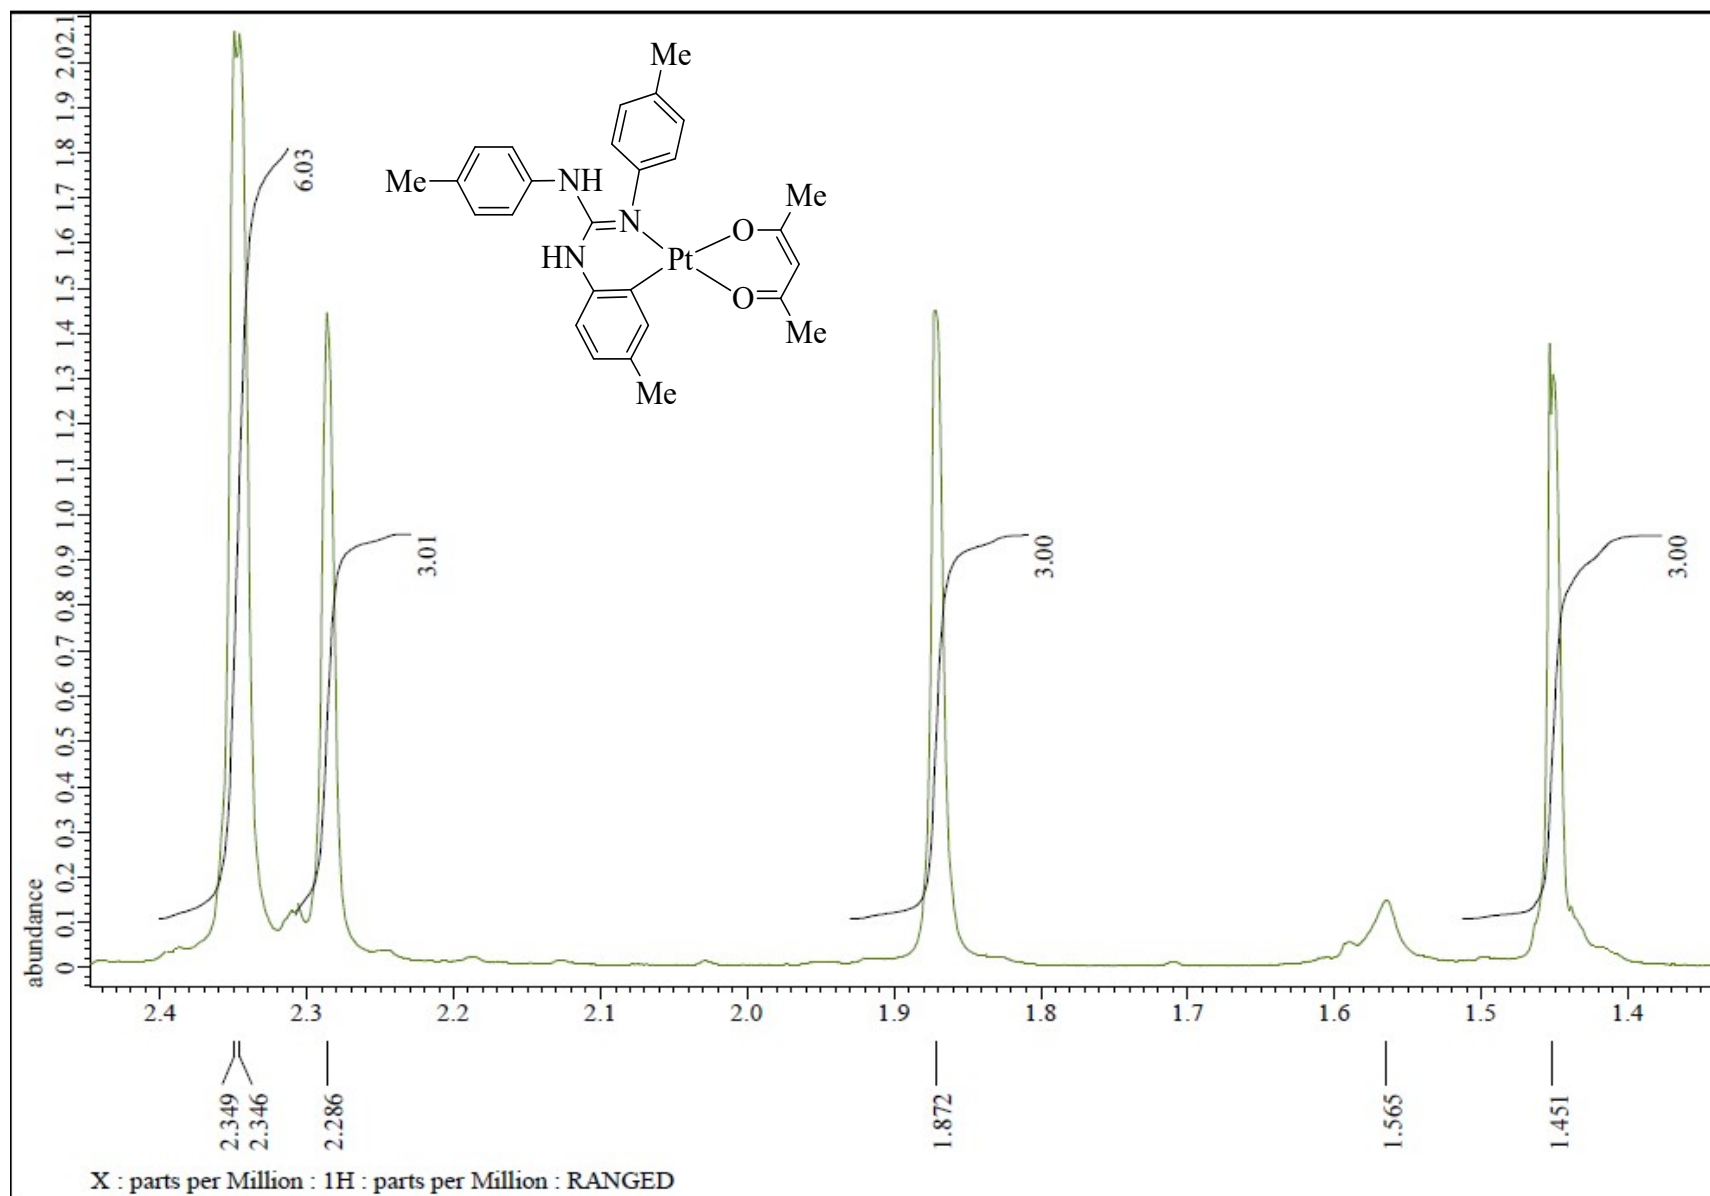

Fig. S95 <sup>1</sup>H NMR (CDCl<sub>3</sub>, 400 MHz) spectrum of **12** in the indicated region.

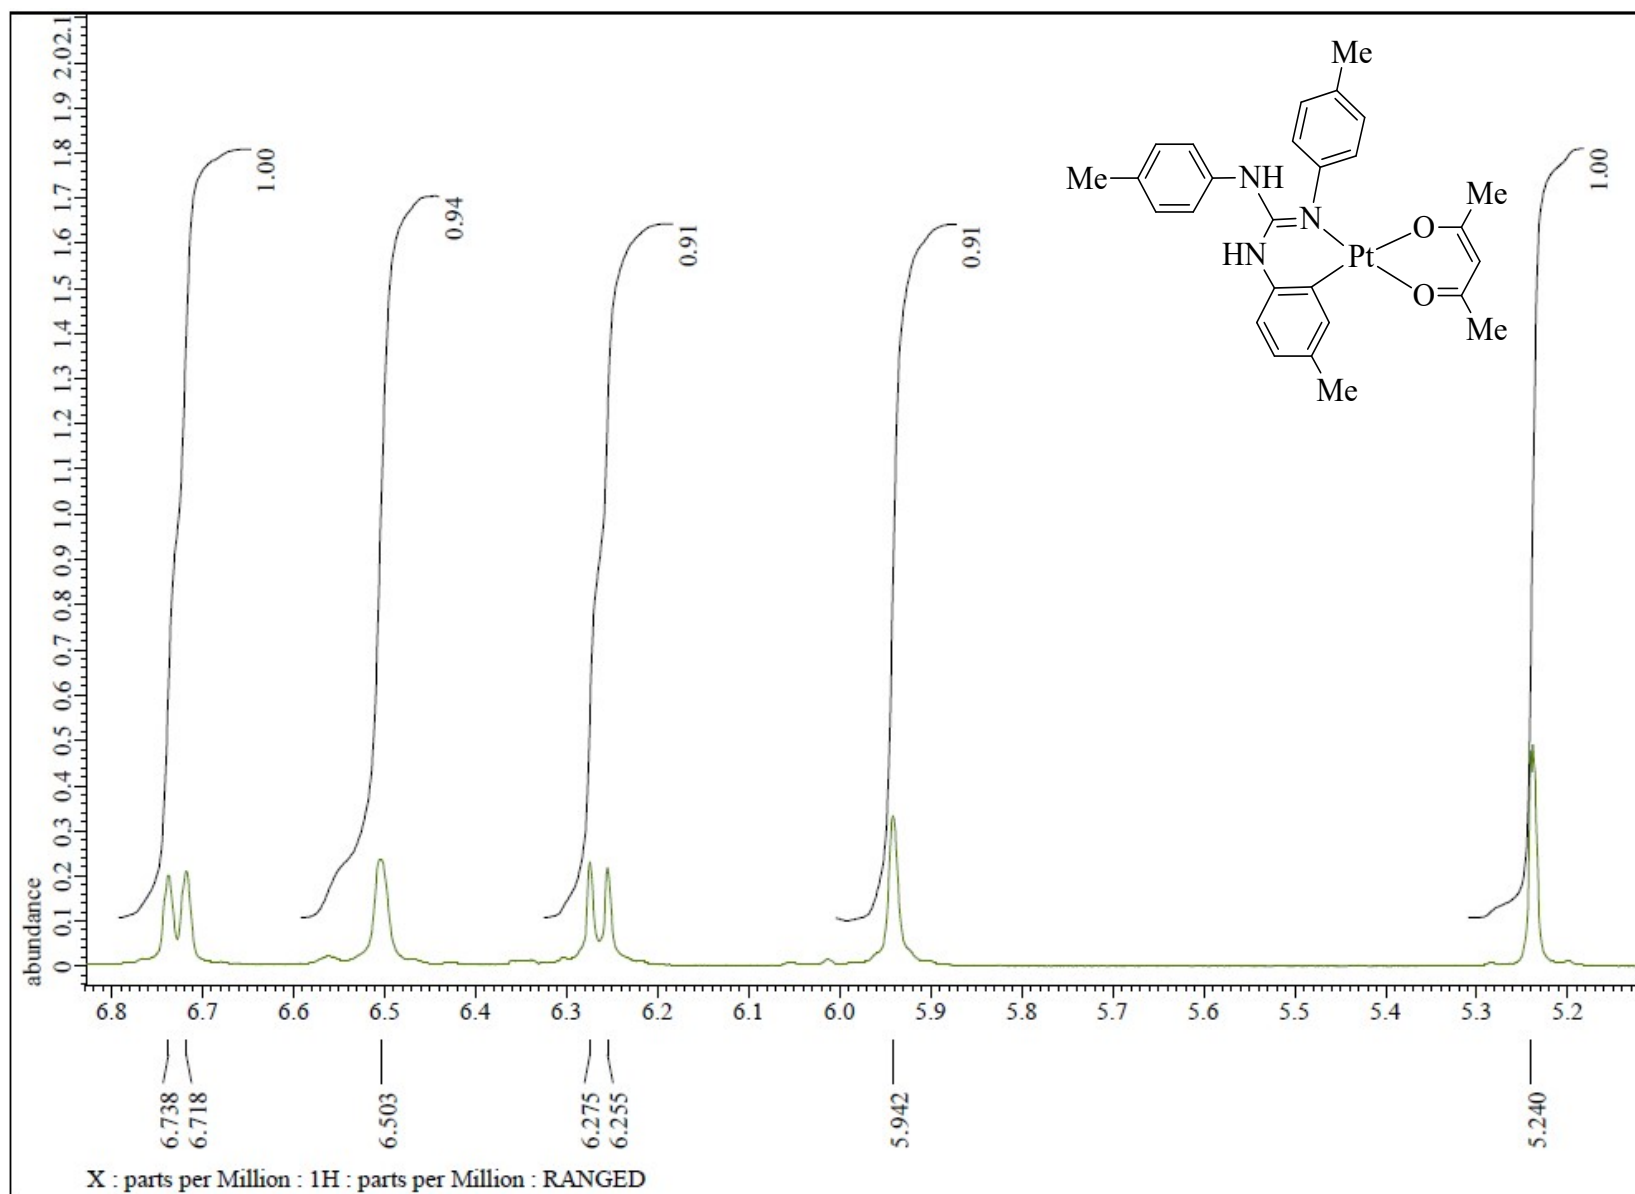

Fig. S96  $^1\text{H}$  NMR ( $\text{CDCl}_3$ , 400 MHz) spectrum of **12** in the indicated region.

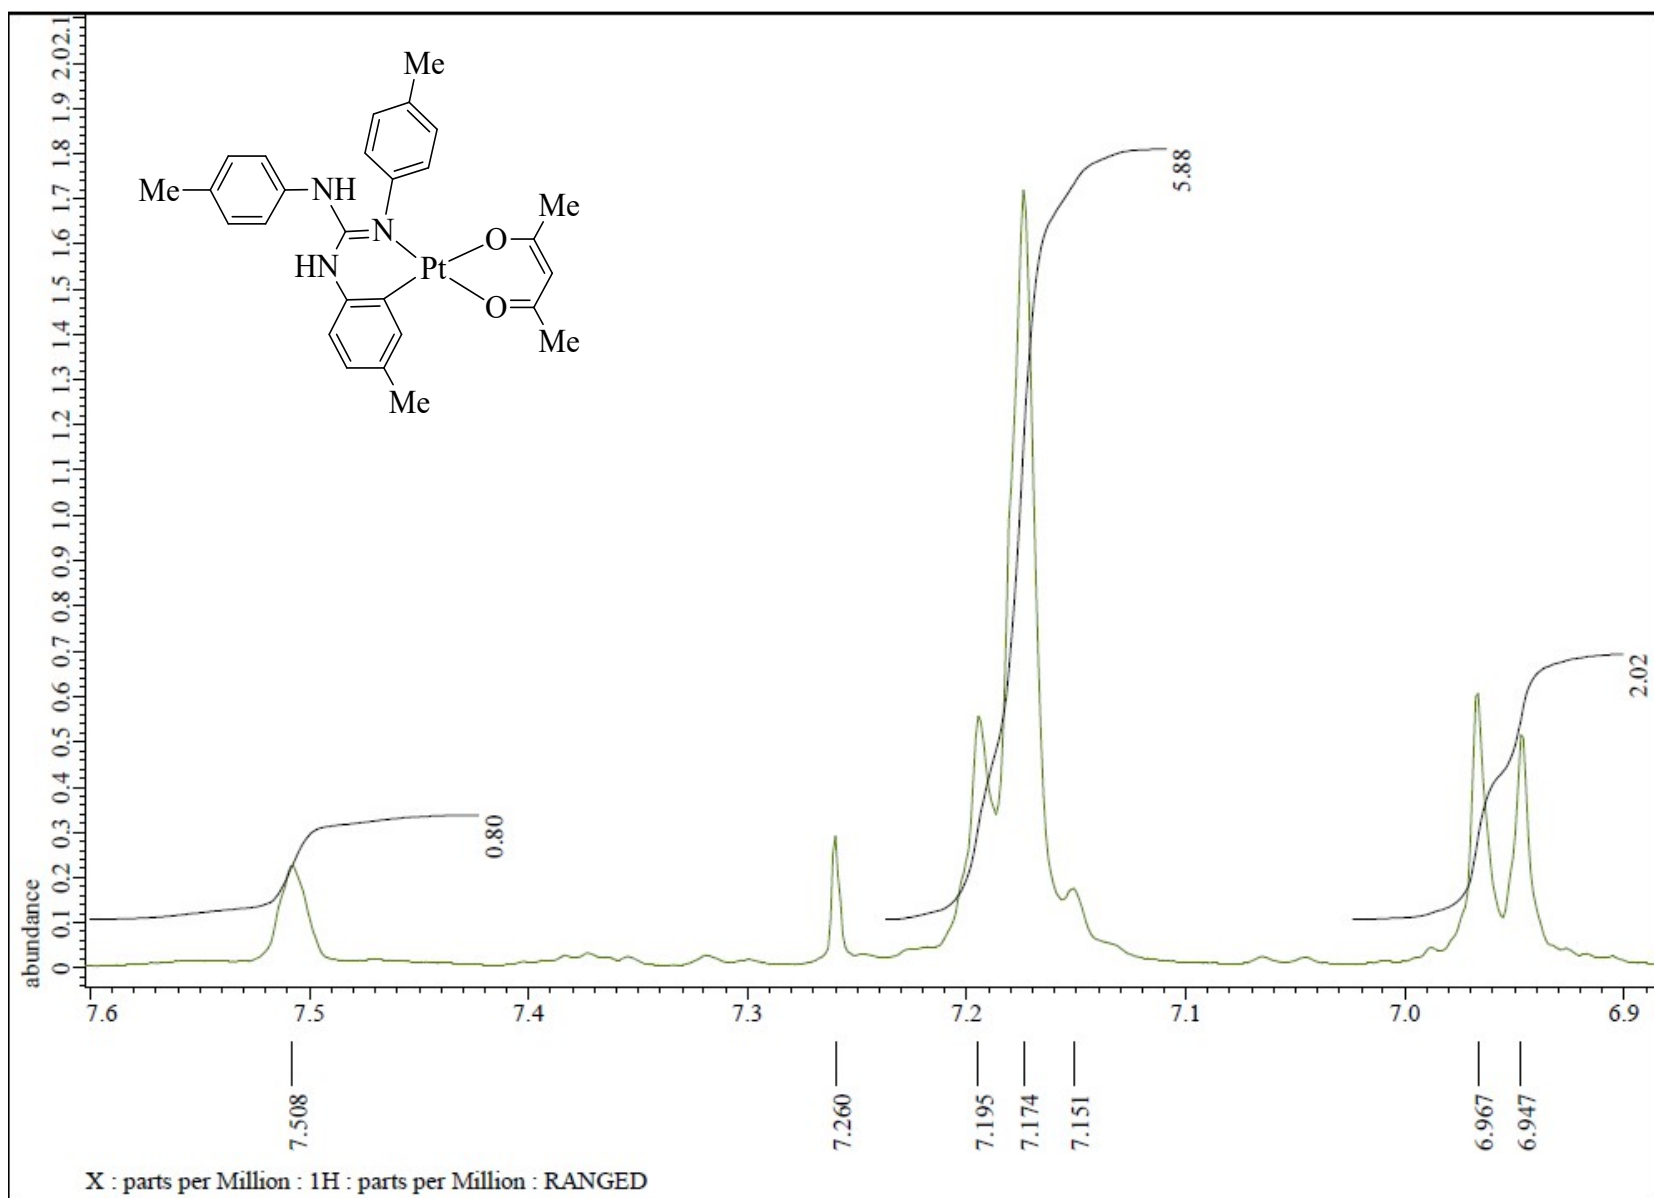

Fig. S97 <sup>1</sup>H NMR (CDCl<sub>3</sub>, 400 MHz) spectrum of **12** in the indicated region.

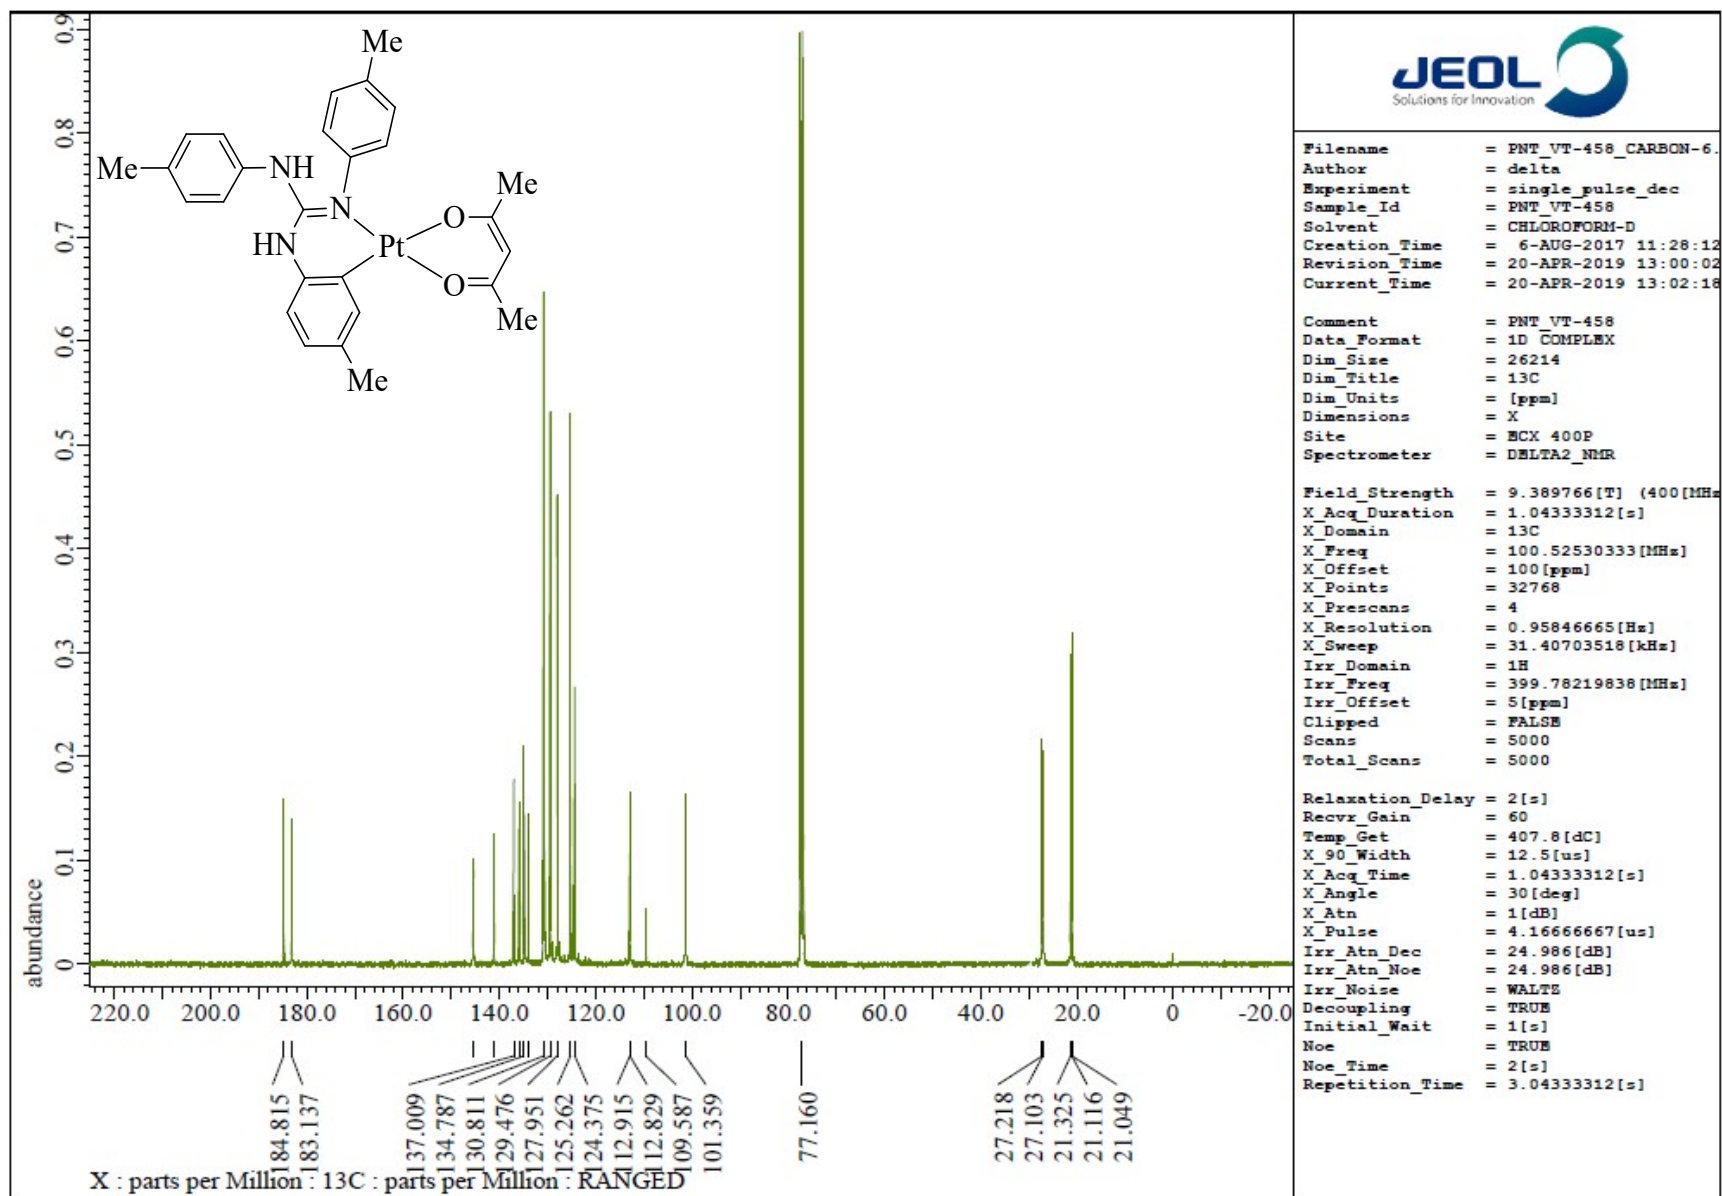

Fig. S98  $^{13}\text{C}\{^1\text{H}\}$  NMR ( $\text{CDCl}_3$ , 100.5 MHz) spectrum of 12.

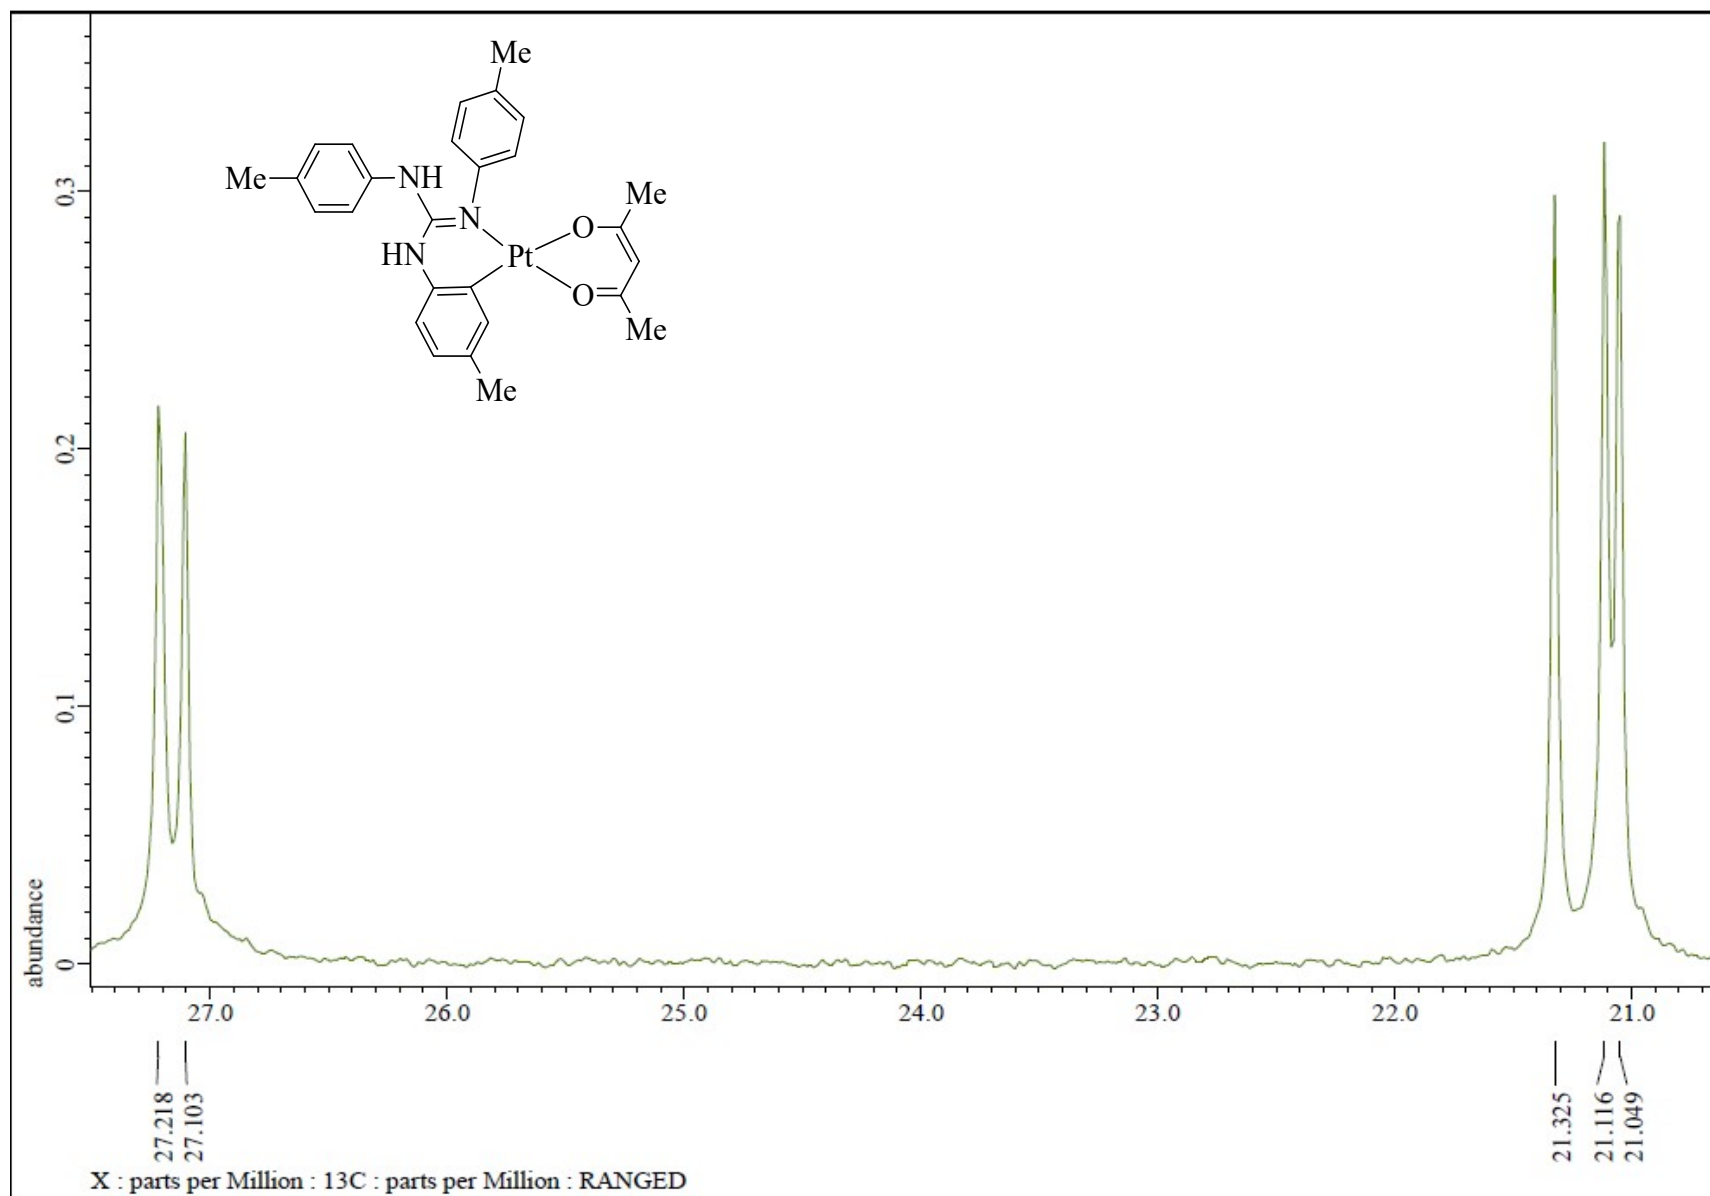

Fig. S99  $^{13}\text{C}\{^1\text{H}\}$  NMR (CDCl<sub>3</sub>, 100.5 MHz) spectrum of **12** in the indicated region.

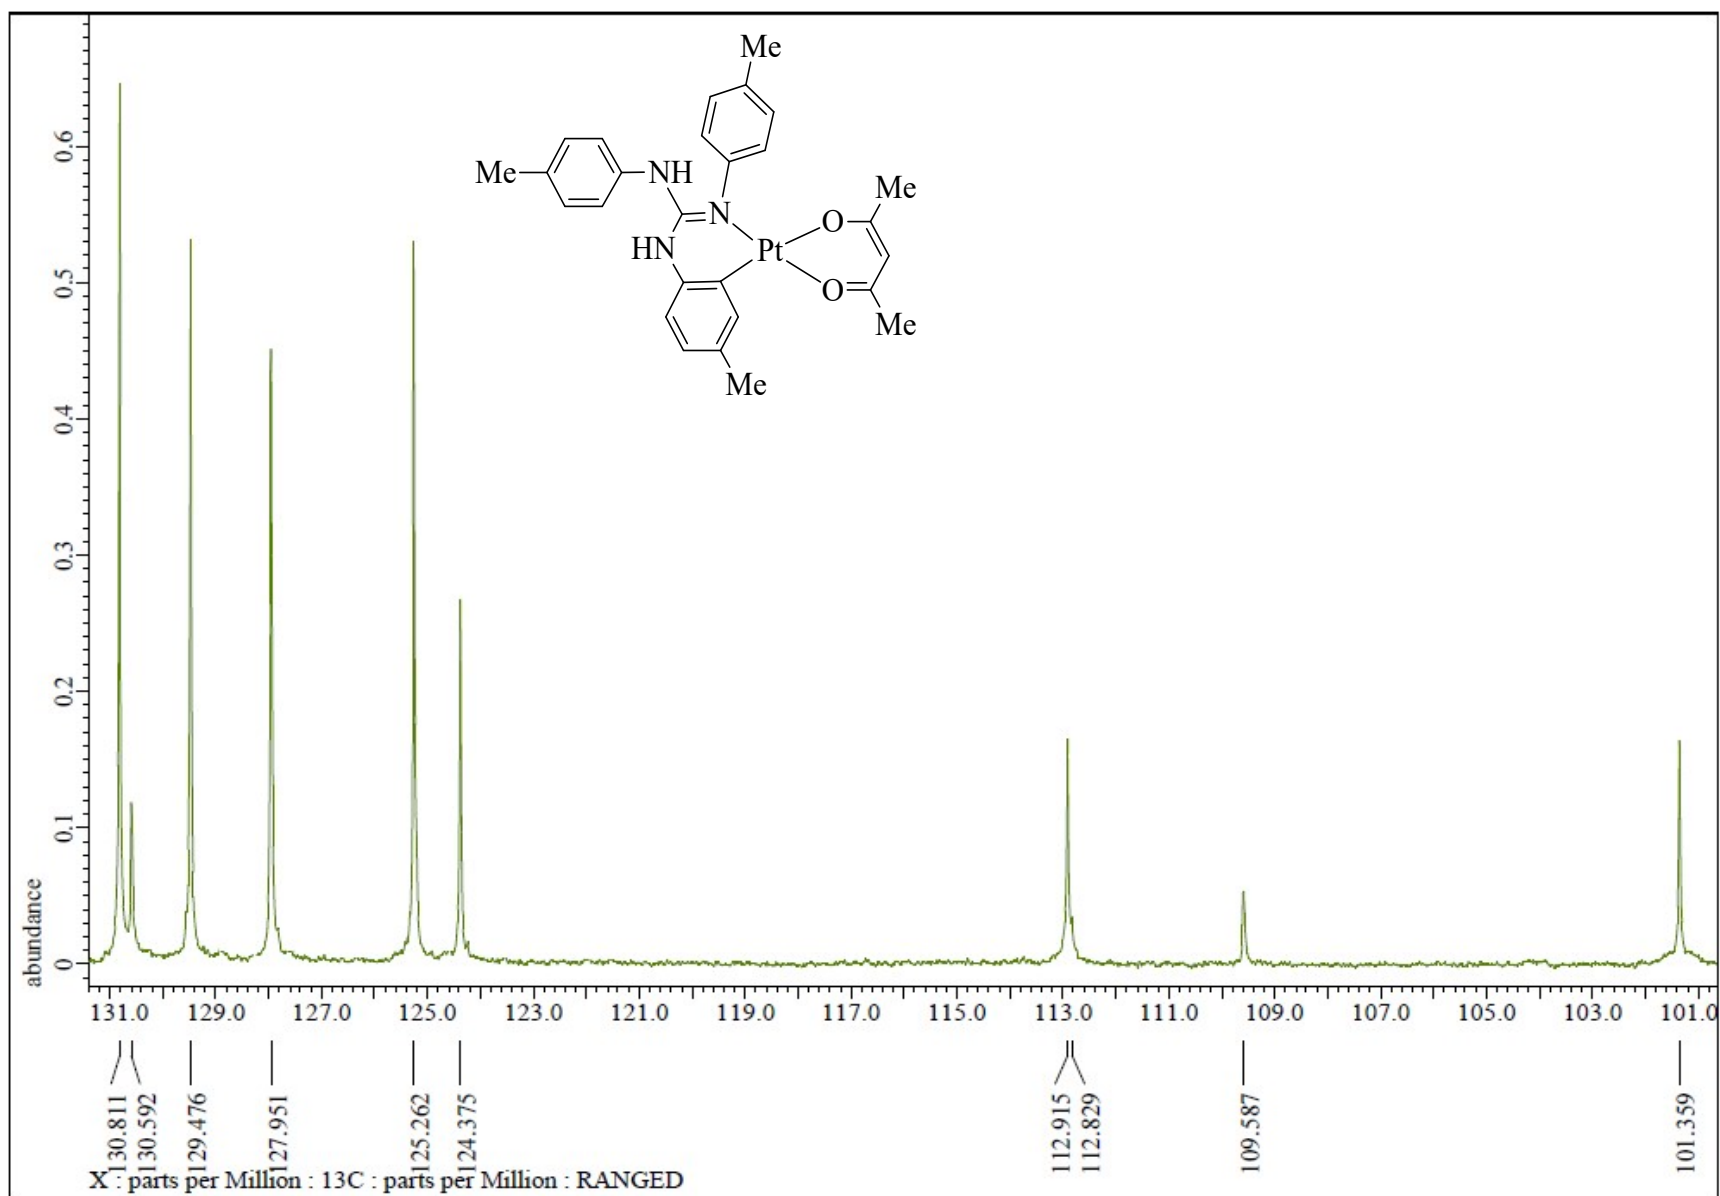

Fig. S100  $^{13}\text{C}\{^1\text{H}\}$  NMR ( $\text{CDCl}_3$ , 100.5 MHz) spectrum of **12** in the indicated region.

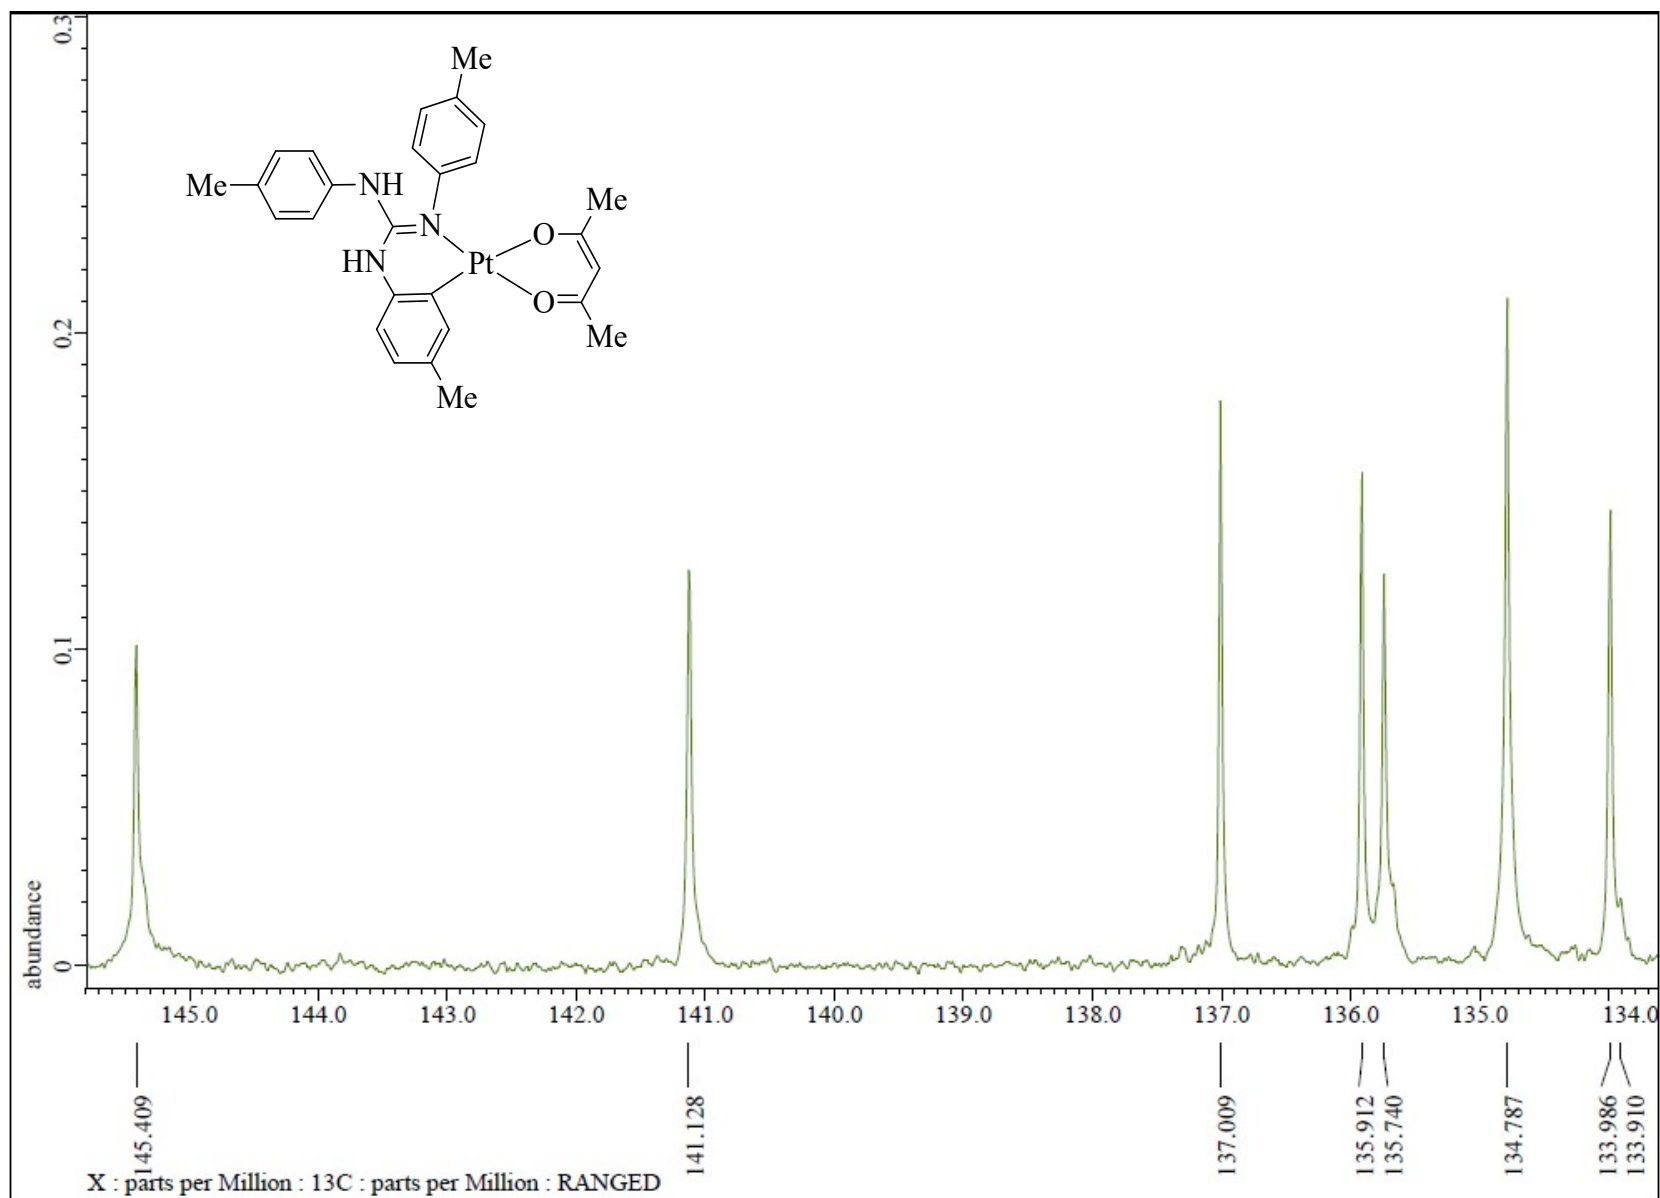

Fig. S101  $^{13}\text{C}\{^1\text{H}\}$  NMR ( $\text{CDCl}_3$ , 100.5 MHz) spectrum of **12** in the indicated region.

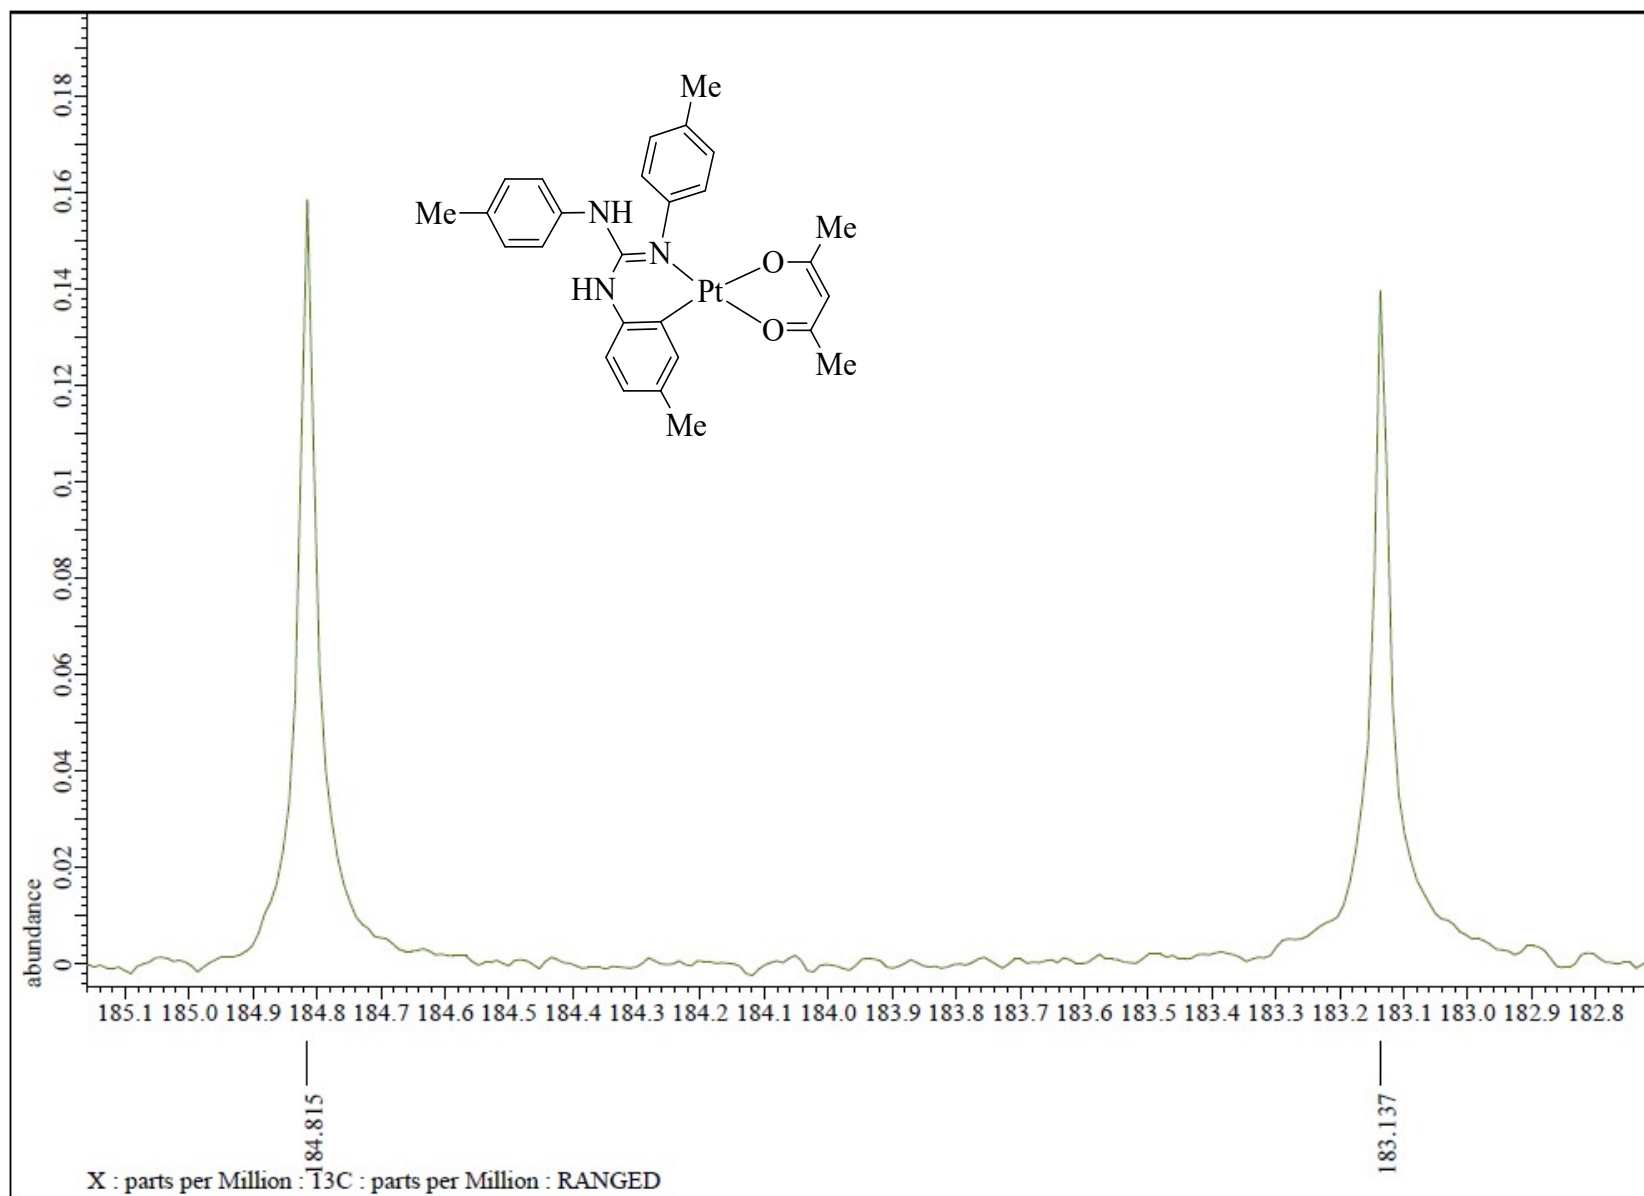

Fig. S102  $^{13}\text{C}\{^1\text{H}\}$  NMR ( $\text{CDCl}_3$ , 100.5 MHz) spectrum of **12** in the indicated region.



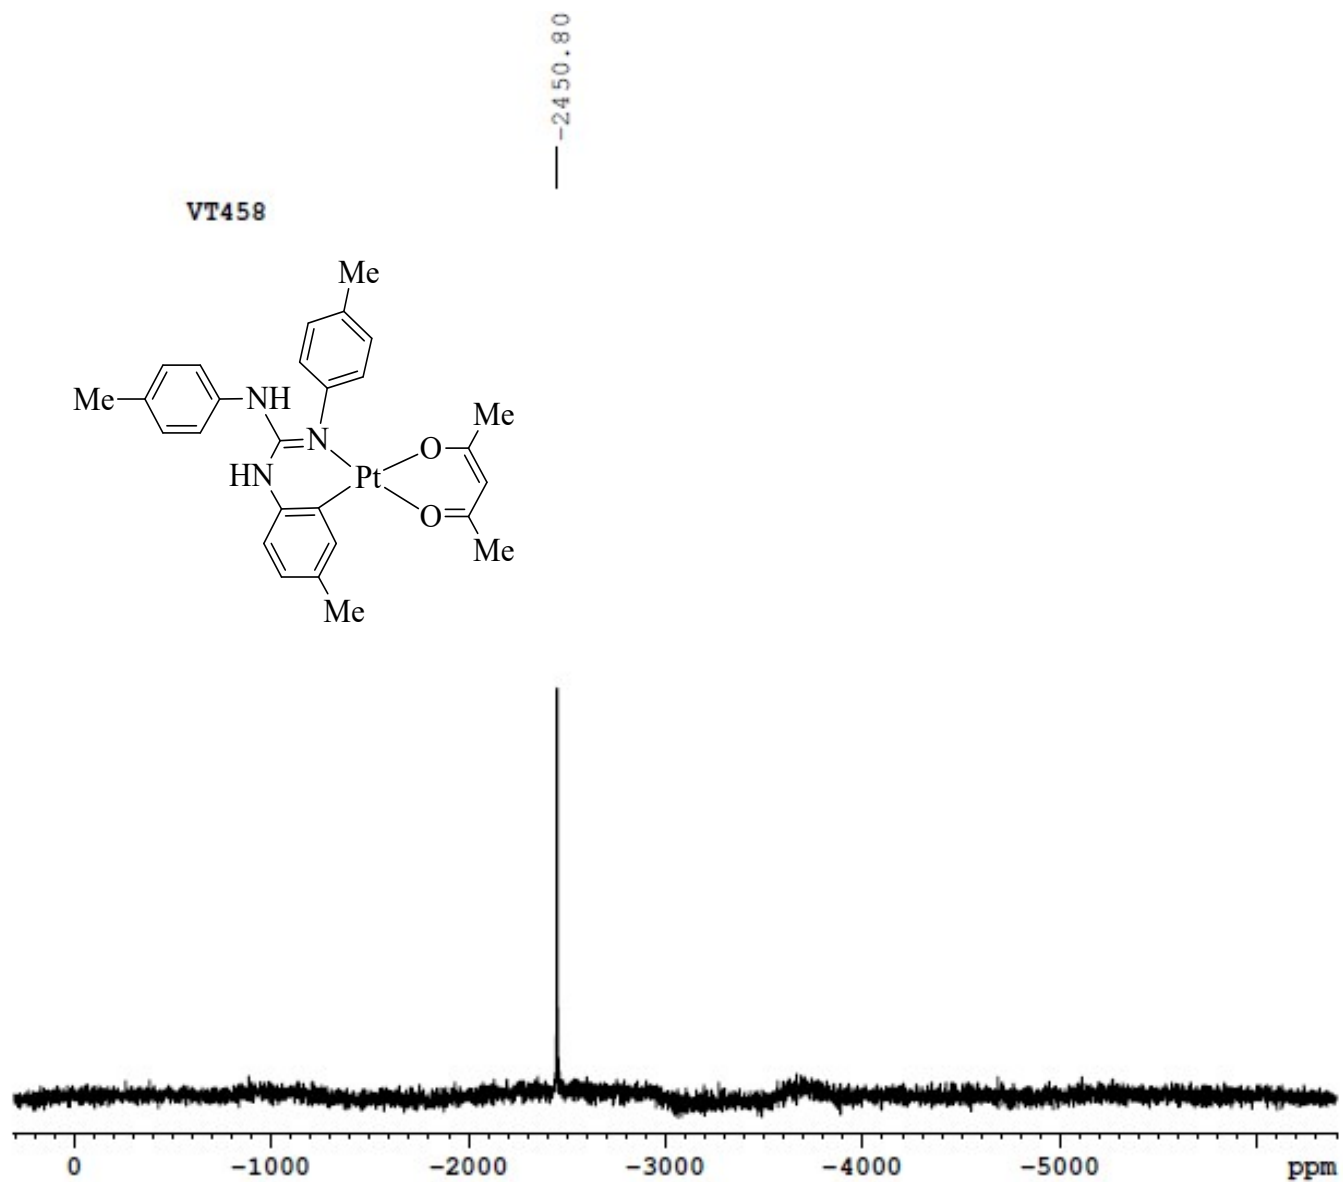

Fig. S103  $^{195}\text{Pt}\{^1\text{H}\}$  NMR ( $\text{CDCl}_3$ , 85.8 MHz) spectrum of 12.

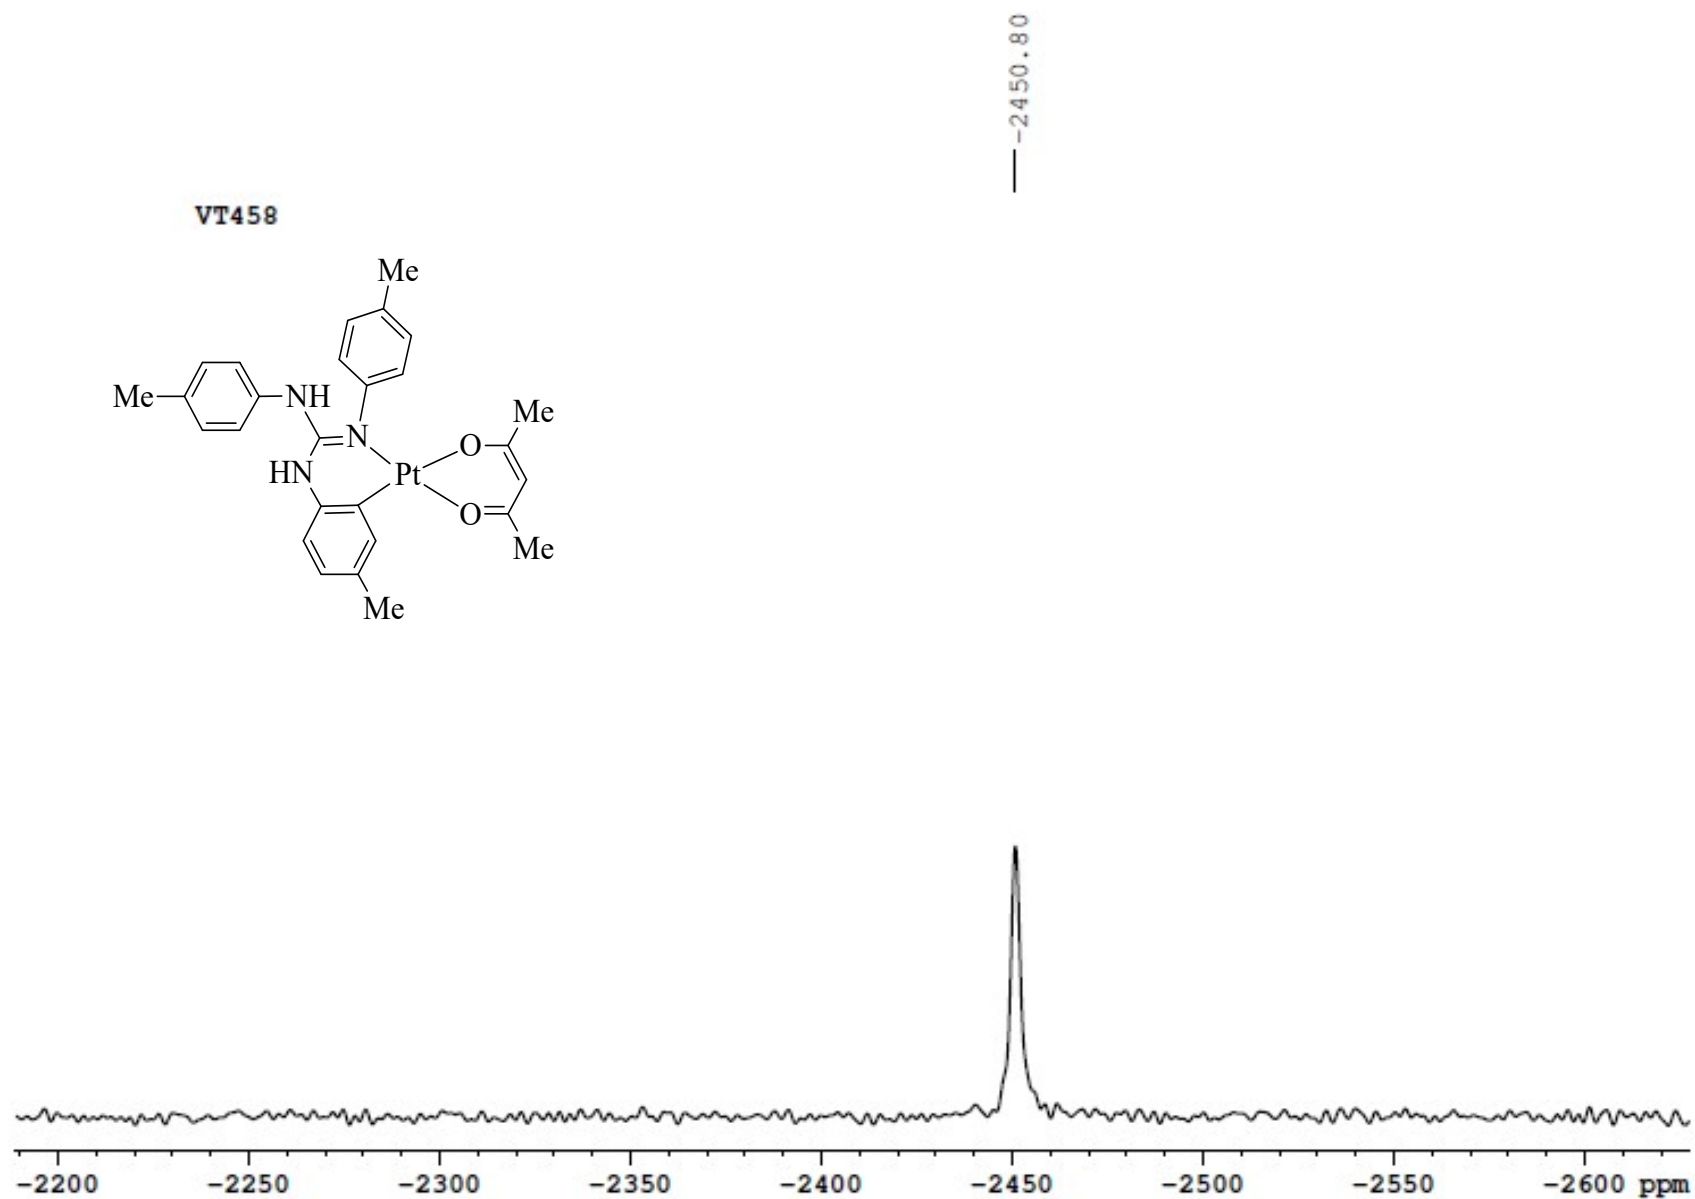

Fig. S104  $^{195}\text{Pt}\{^1\text{H}\}$  NMR ( $\text{CDCl}_3$ , 85.8 MHz) spectrum of **12** in the indicated region.

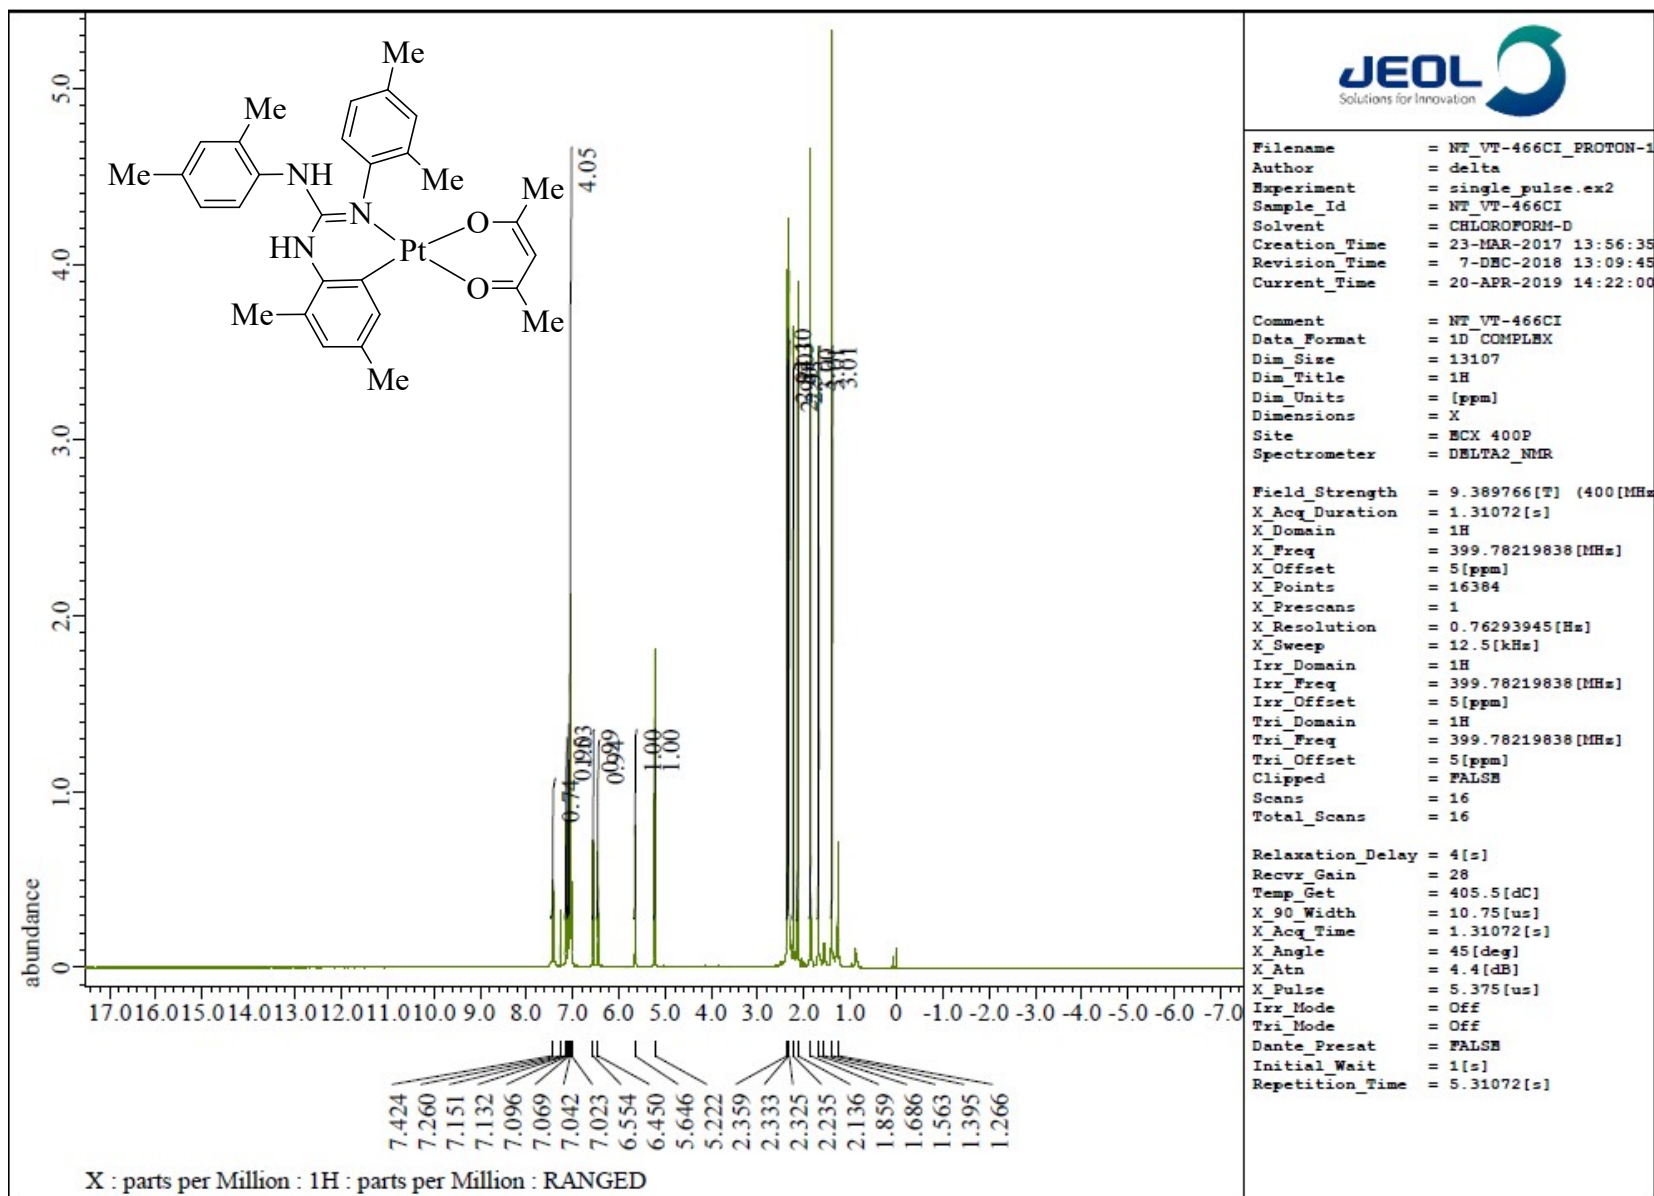

Fig. S105 <sup>1</sup>H NMR (CDCl<sub>3</sub>, 400 MHz) spectrum of 13.

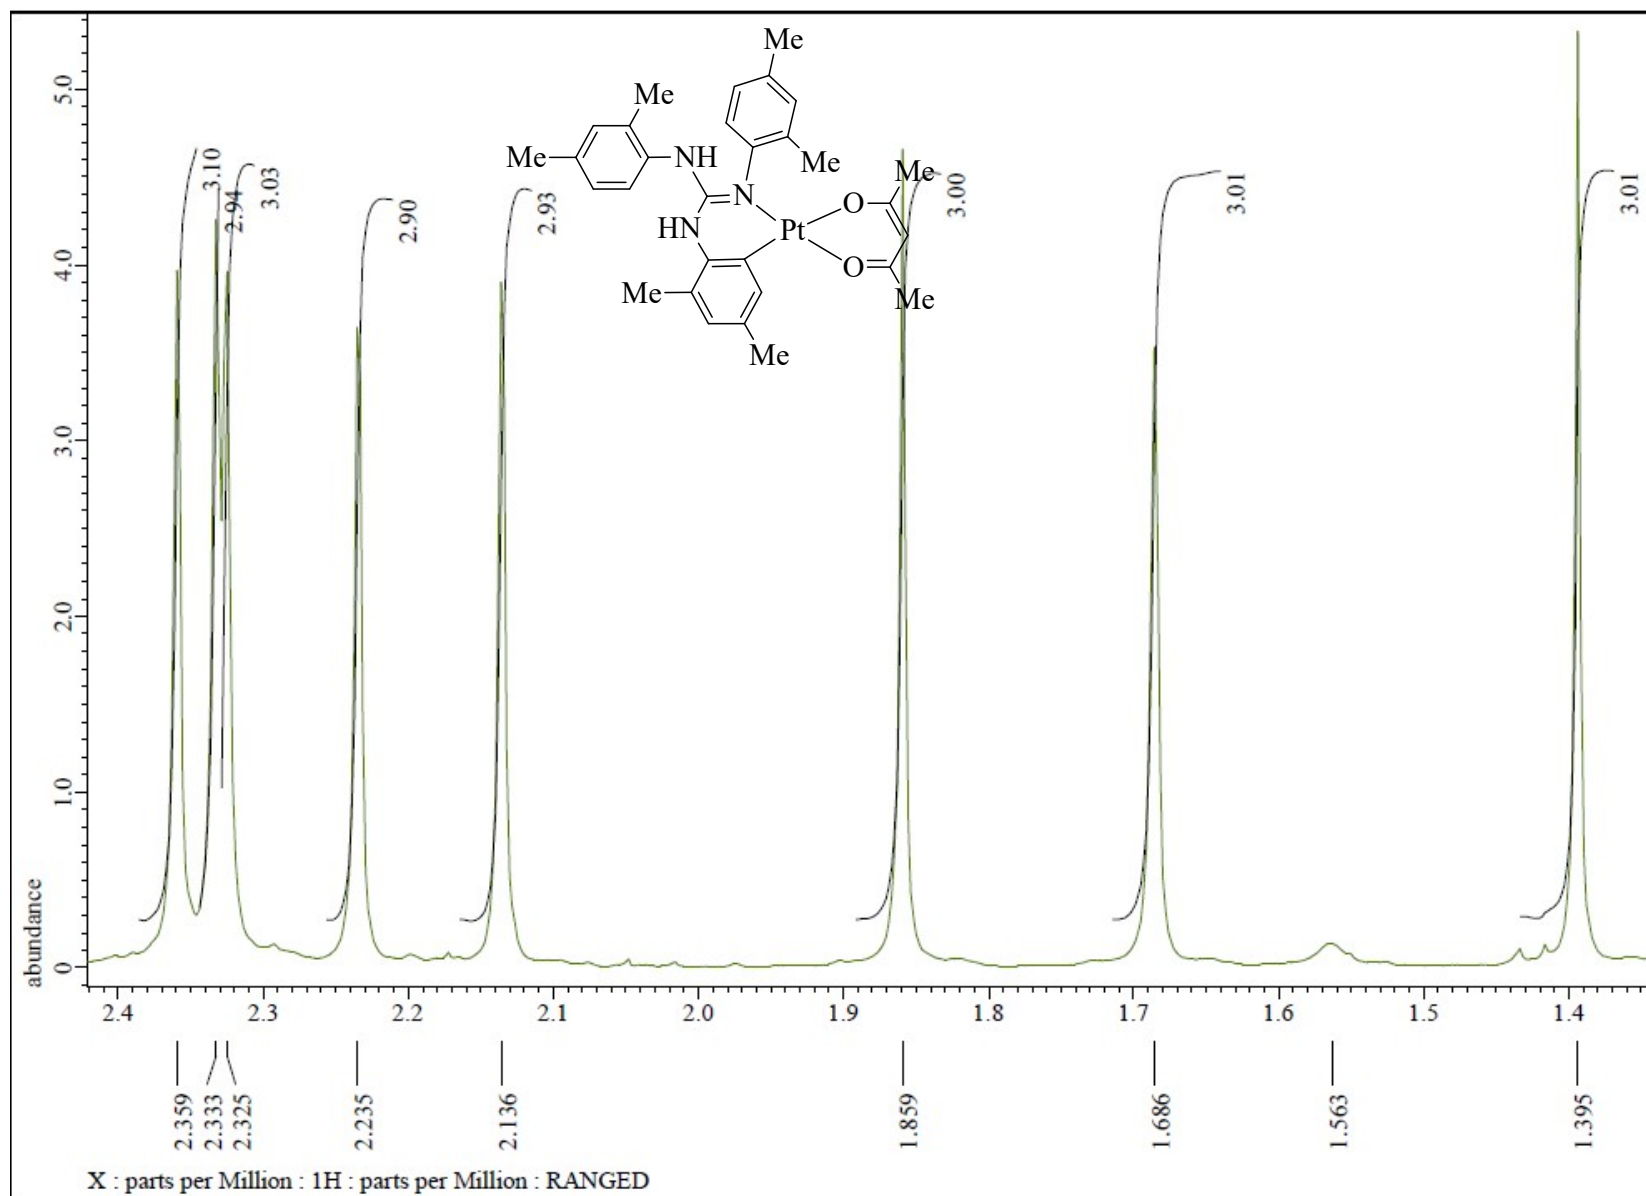

Fig. S106  $^1\text{H}$  NMR ( $\text{CDCl}_3$ , 400 MHz) spectrum of **13** in the indicated region.

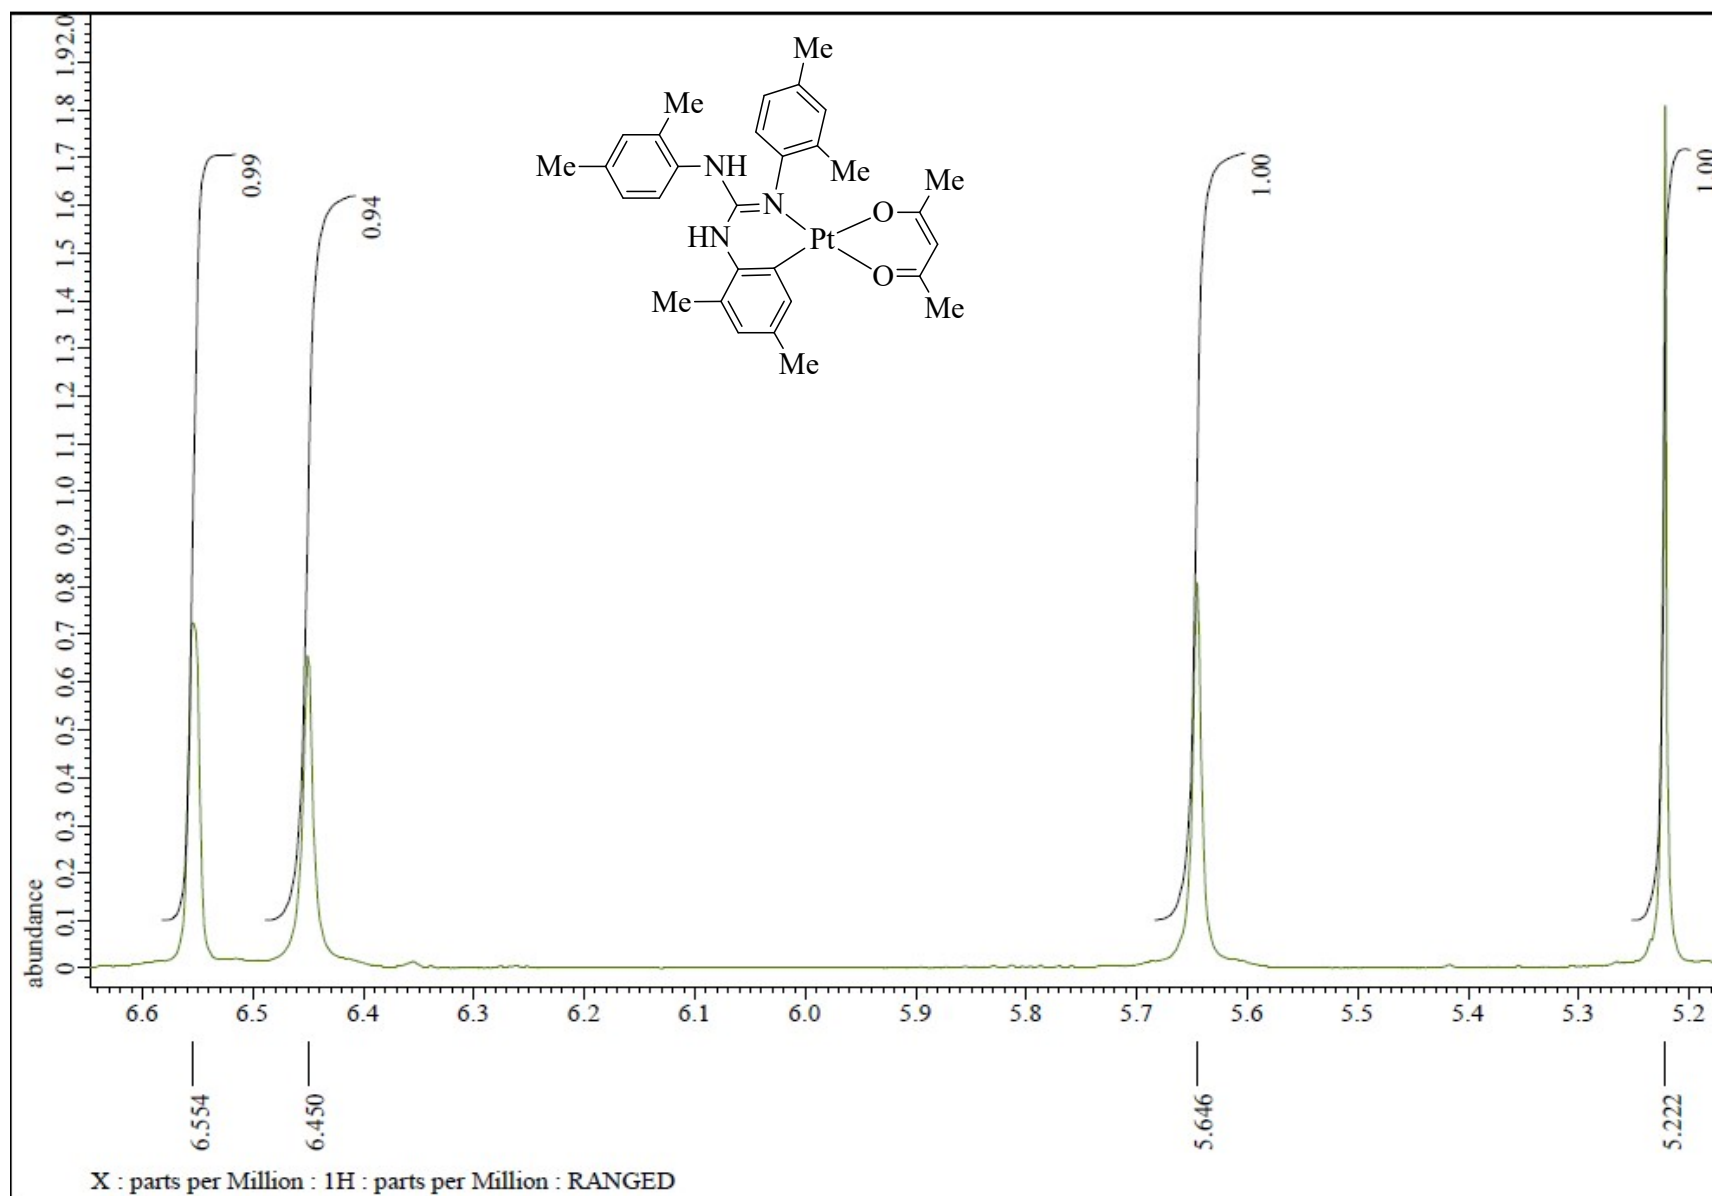

Fig. S107  $^1\text{H}$  NMR ( $\text{CDCl}_3$ , 400 MHz) spectrum of **13** in the indicated region.

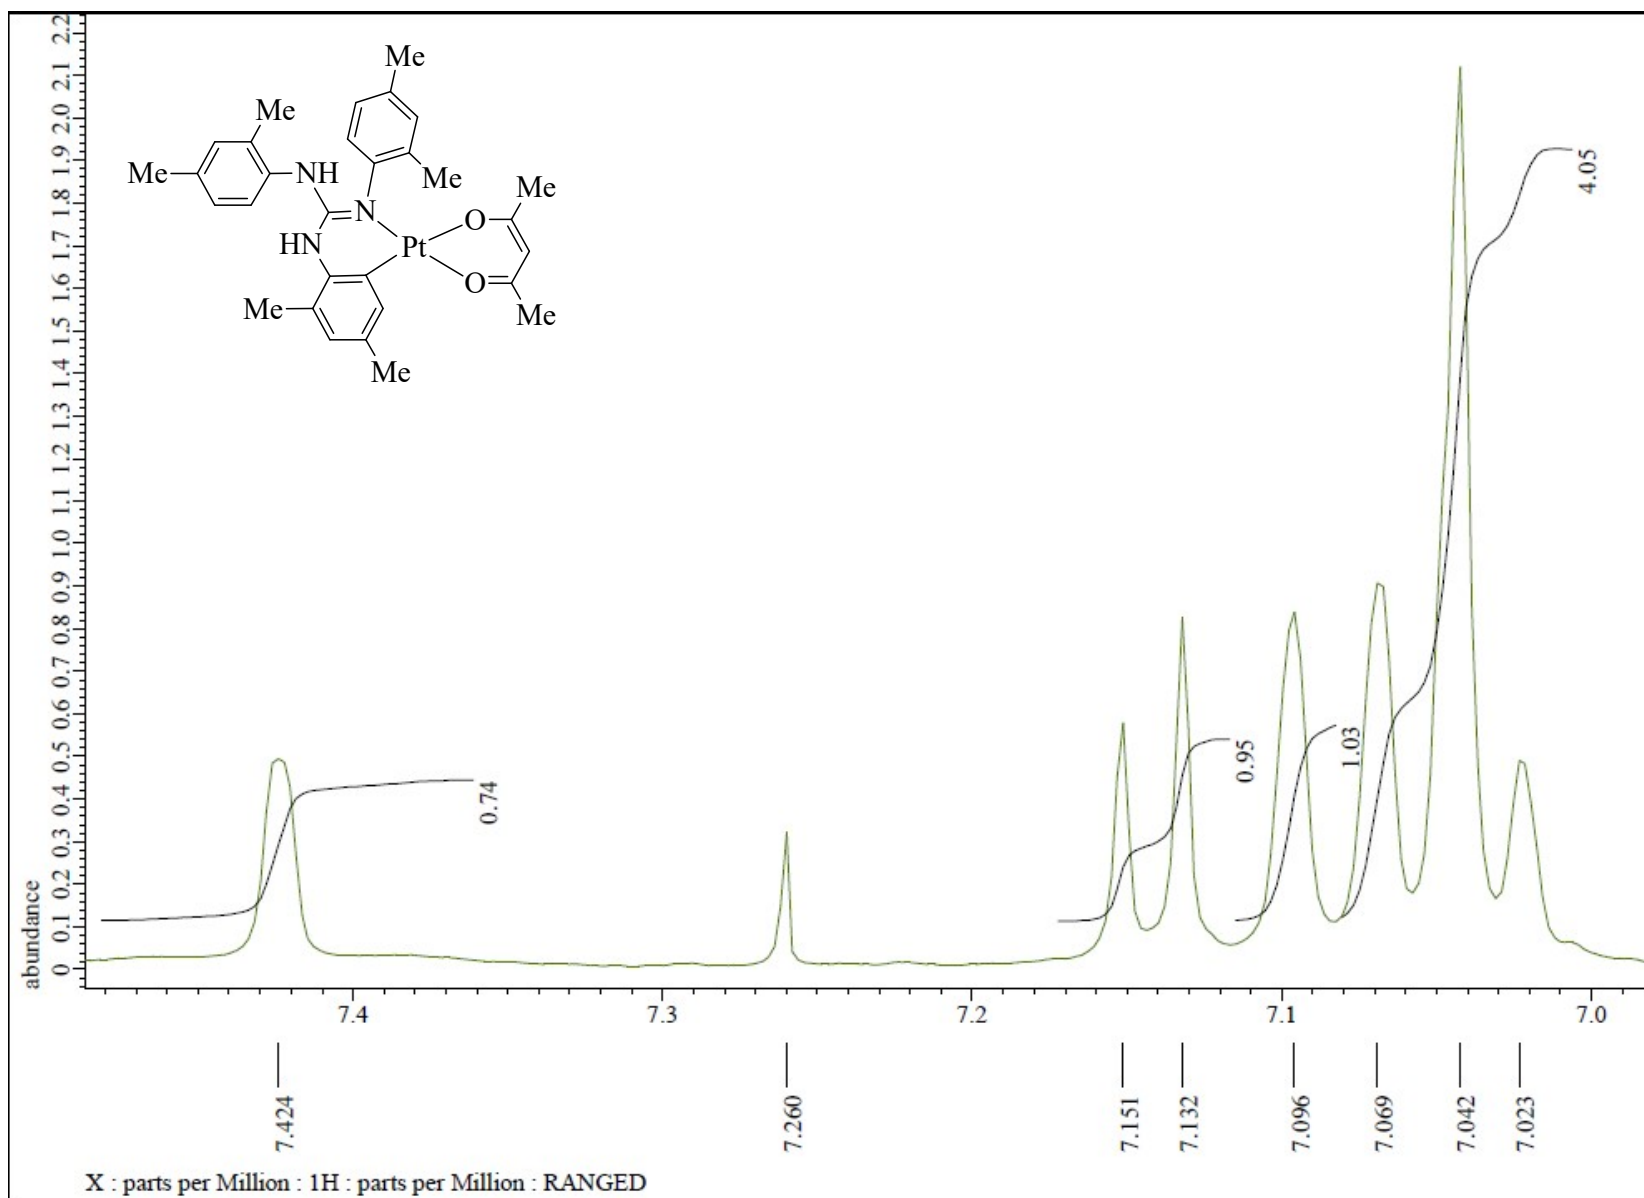

Fig. S108 <sup>1</sup>H NMR (CDCl<sub>3</sub>, 400 MHz) spectrum of **13** in the indicated region.

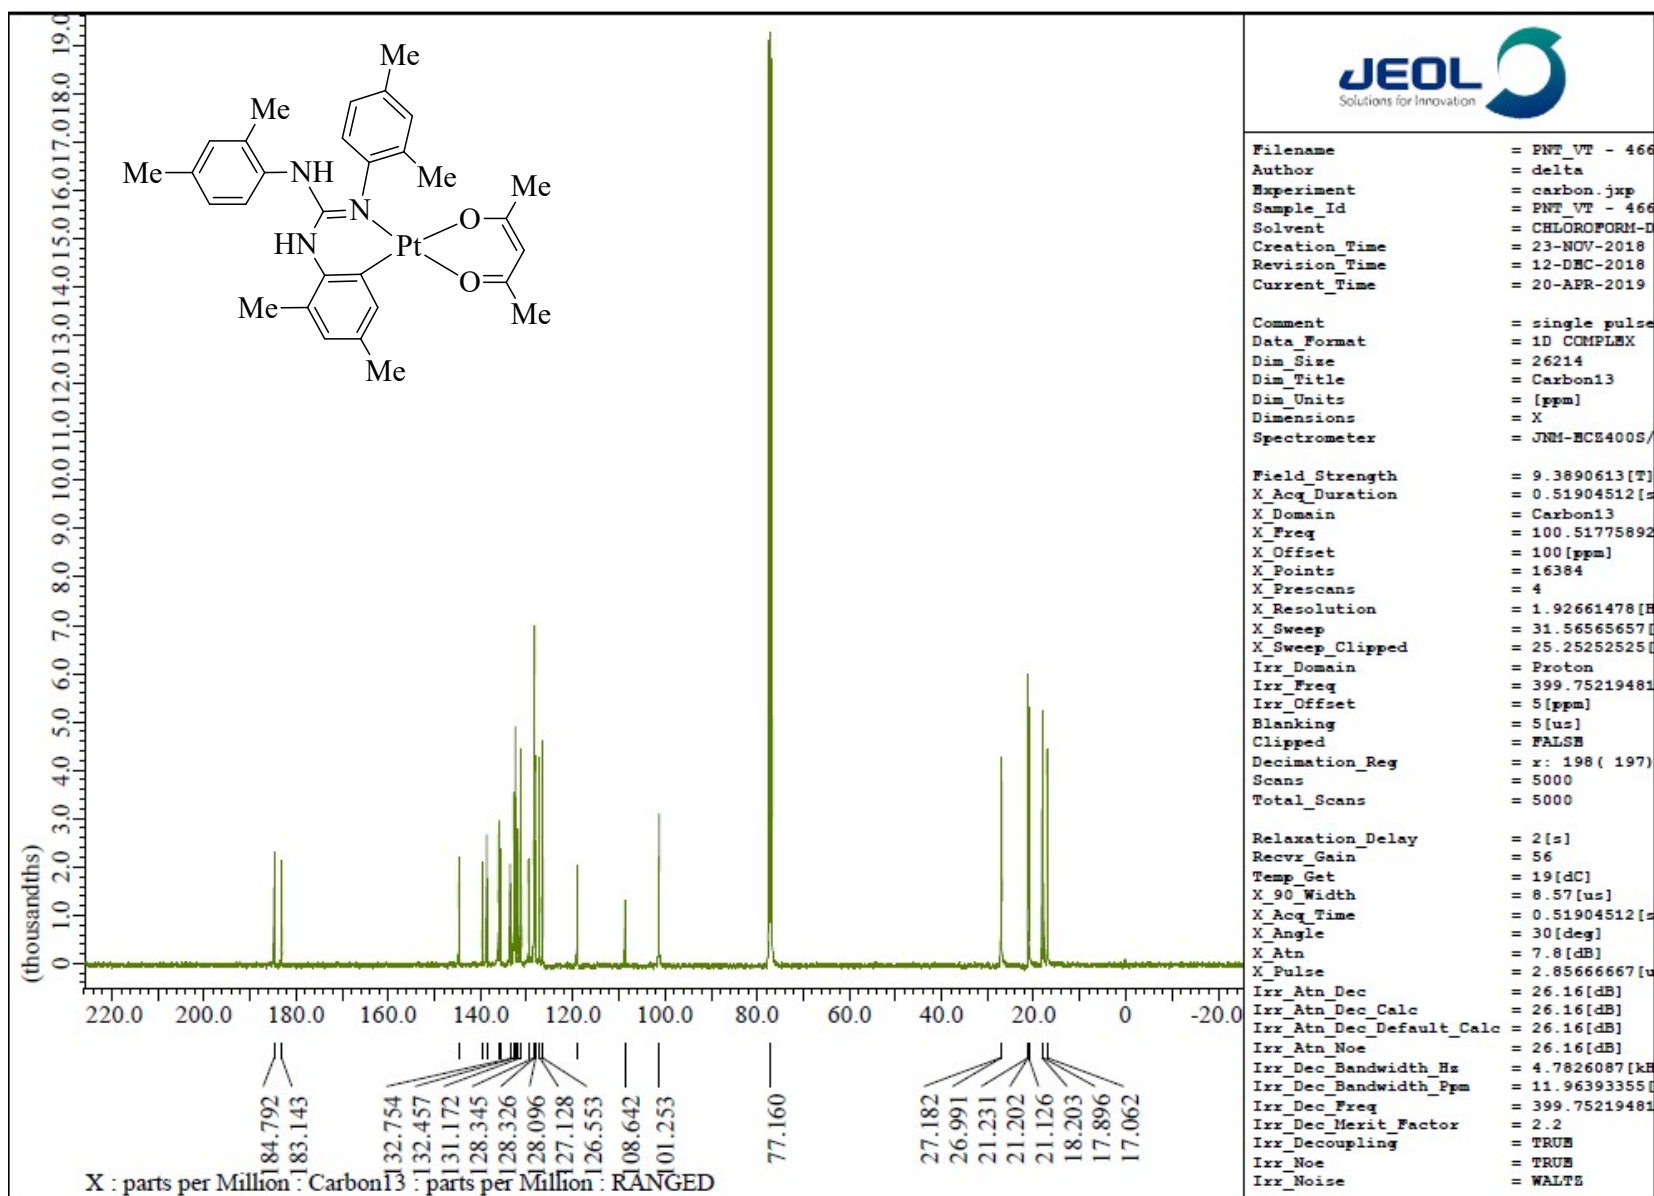

Fig. S109  $^{13}\text{C}\{^1\text{H}\}$  NMR ( $\text{CDCl}_3$ , 100.5 MHz) spectrum of 13.

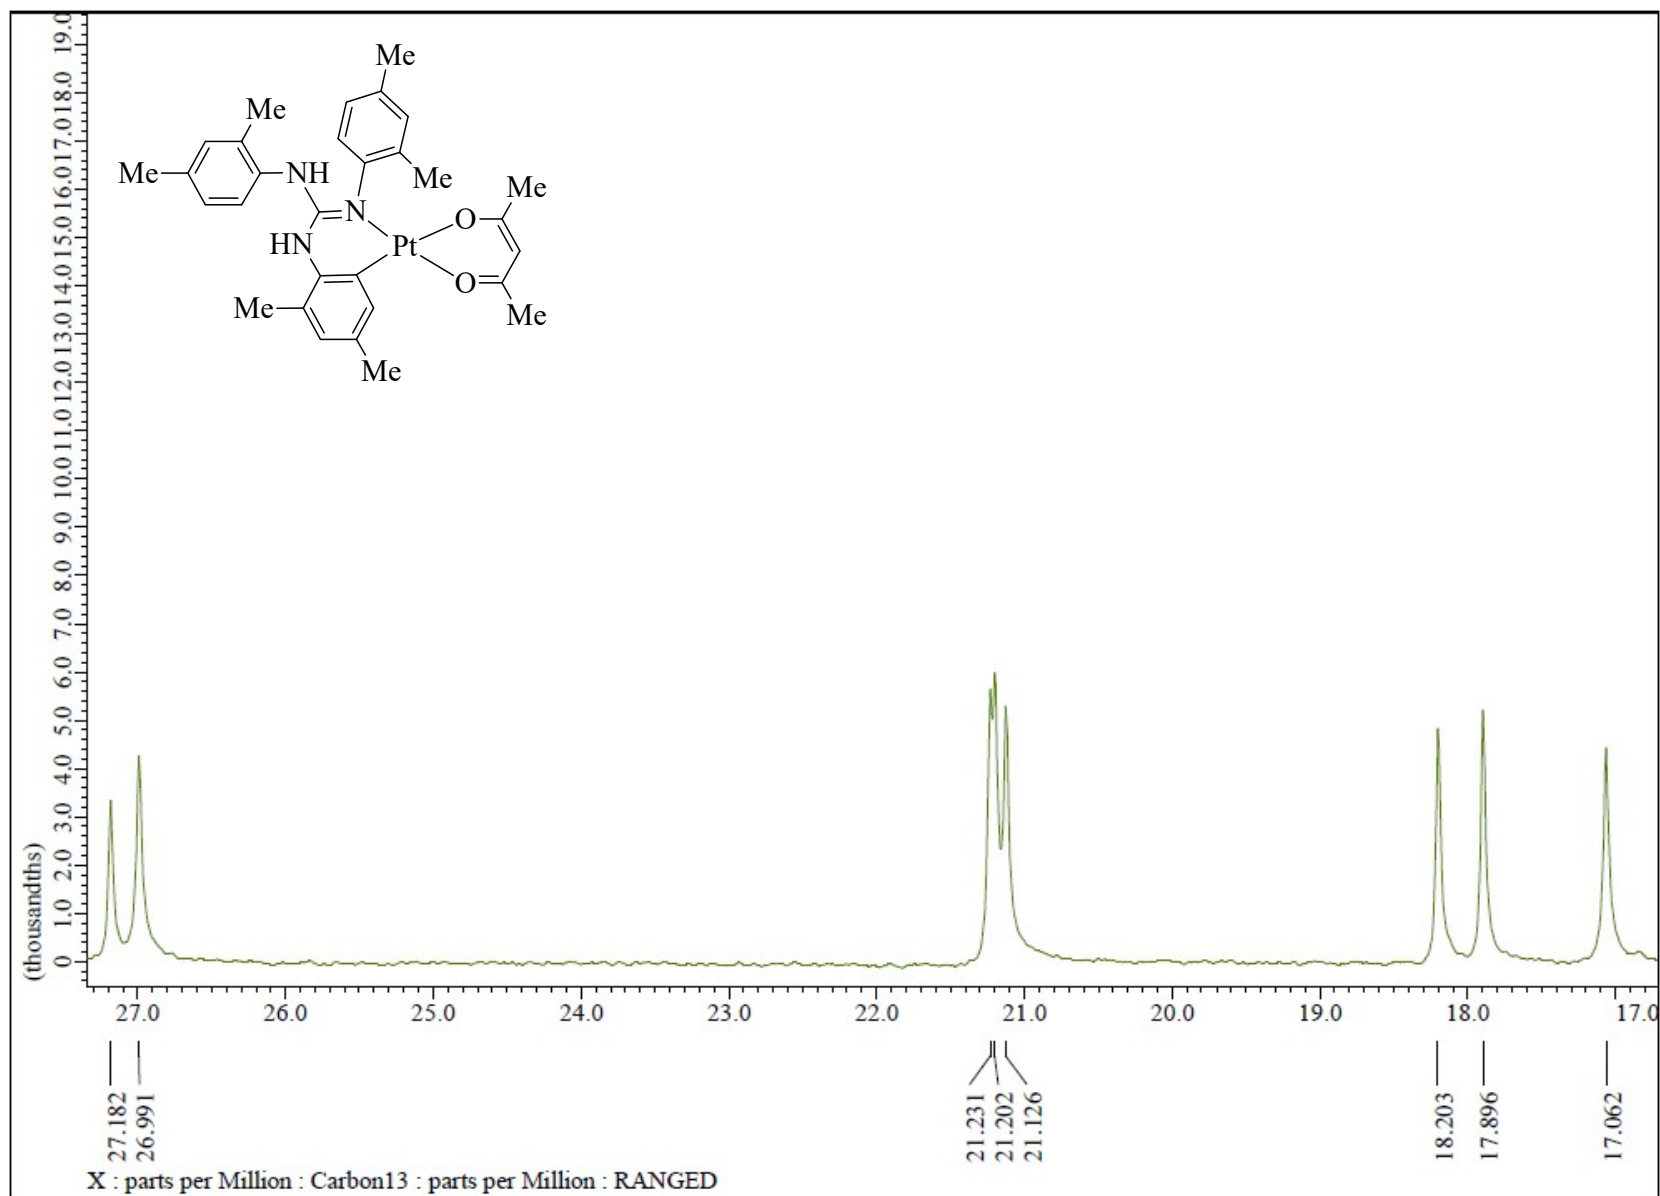

Fig. S110  $^{13}\text{C}\{^1\text{H}\}$  NMR (CDCl<sub>3</sub>, 100.5 MHz) spectrum of **13** in the indicated region.



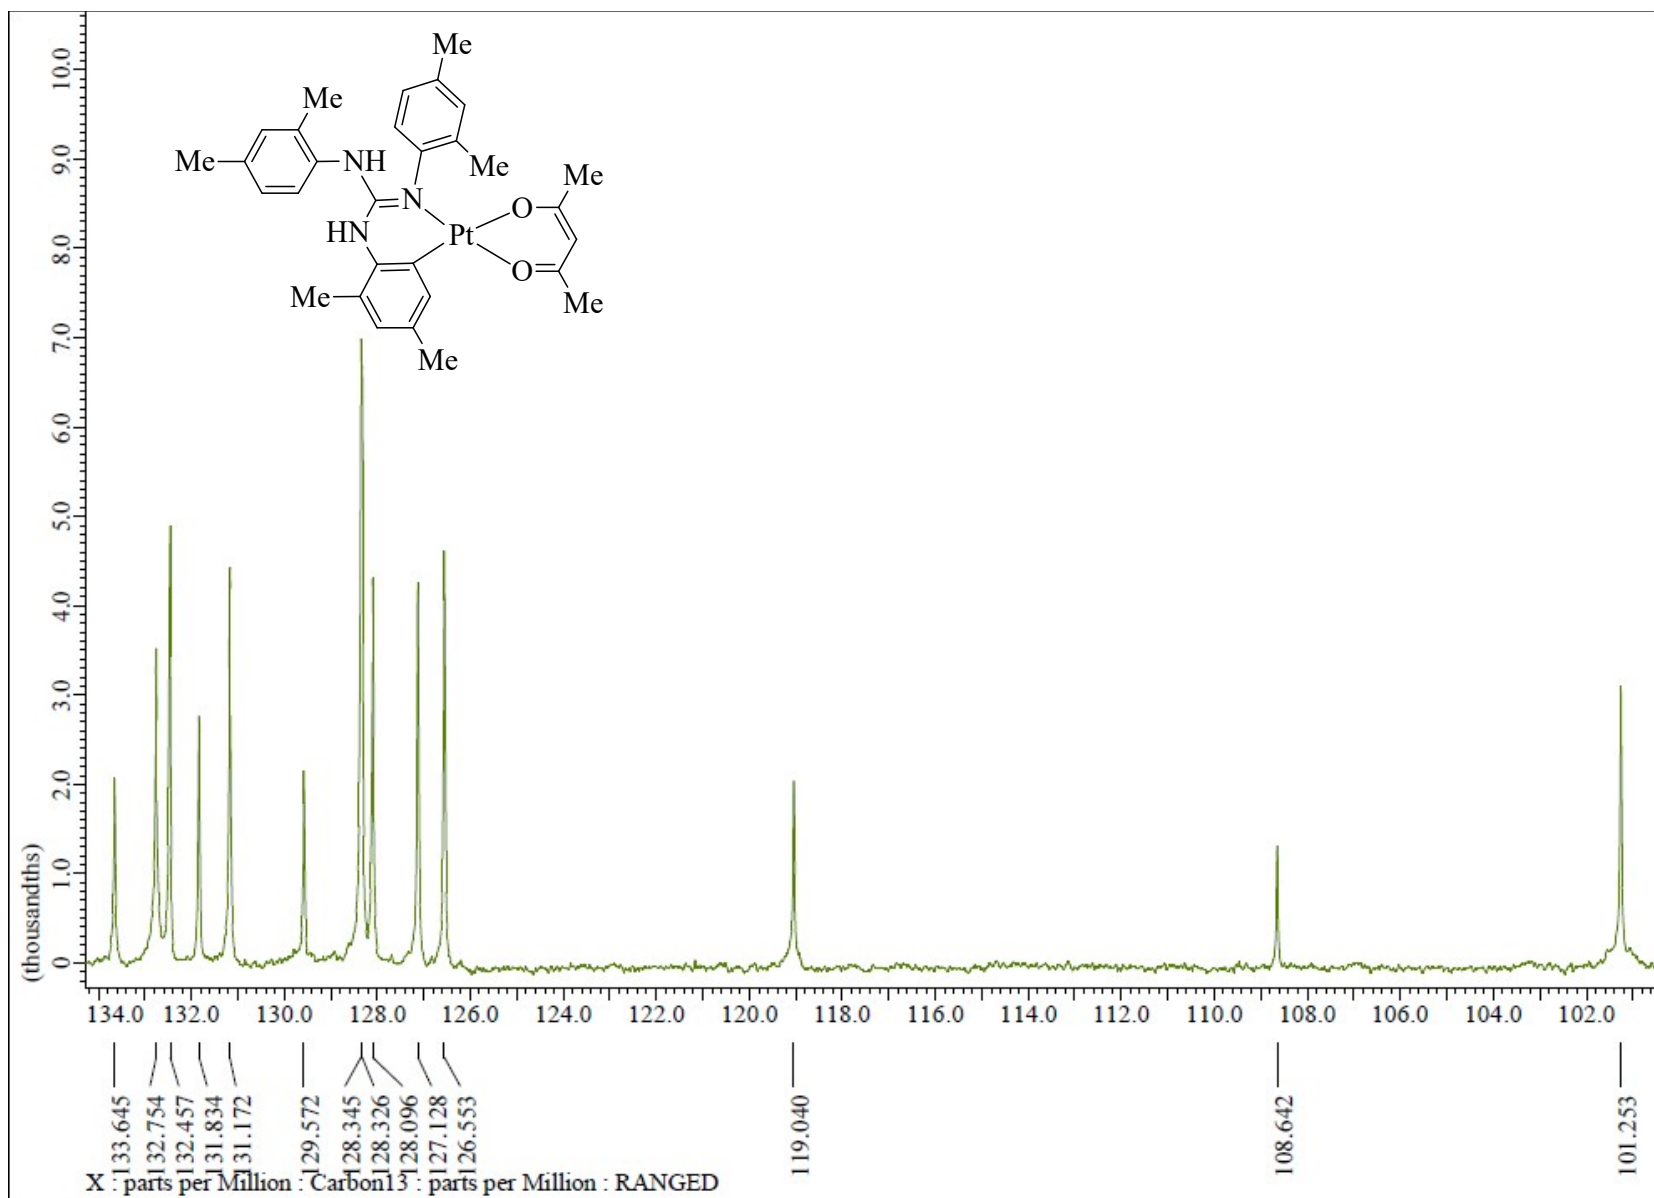

Fig. S111  $^{13}\text{C}\{^1\text{H}\}$  NMR (CDCl<sub>3</sub>, 100.5 MHz) spectrum of **13** in the indicated region.

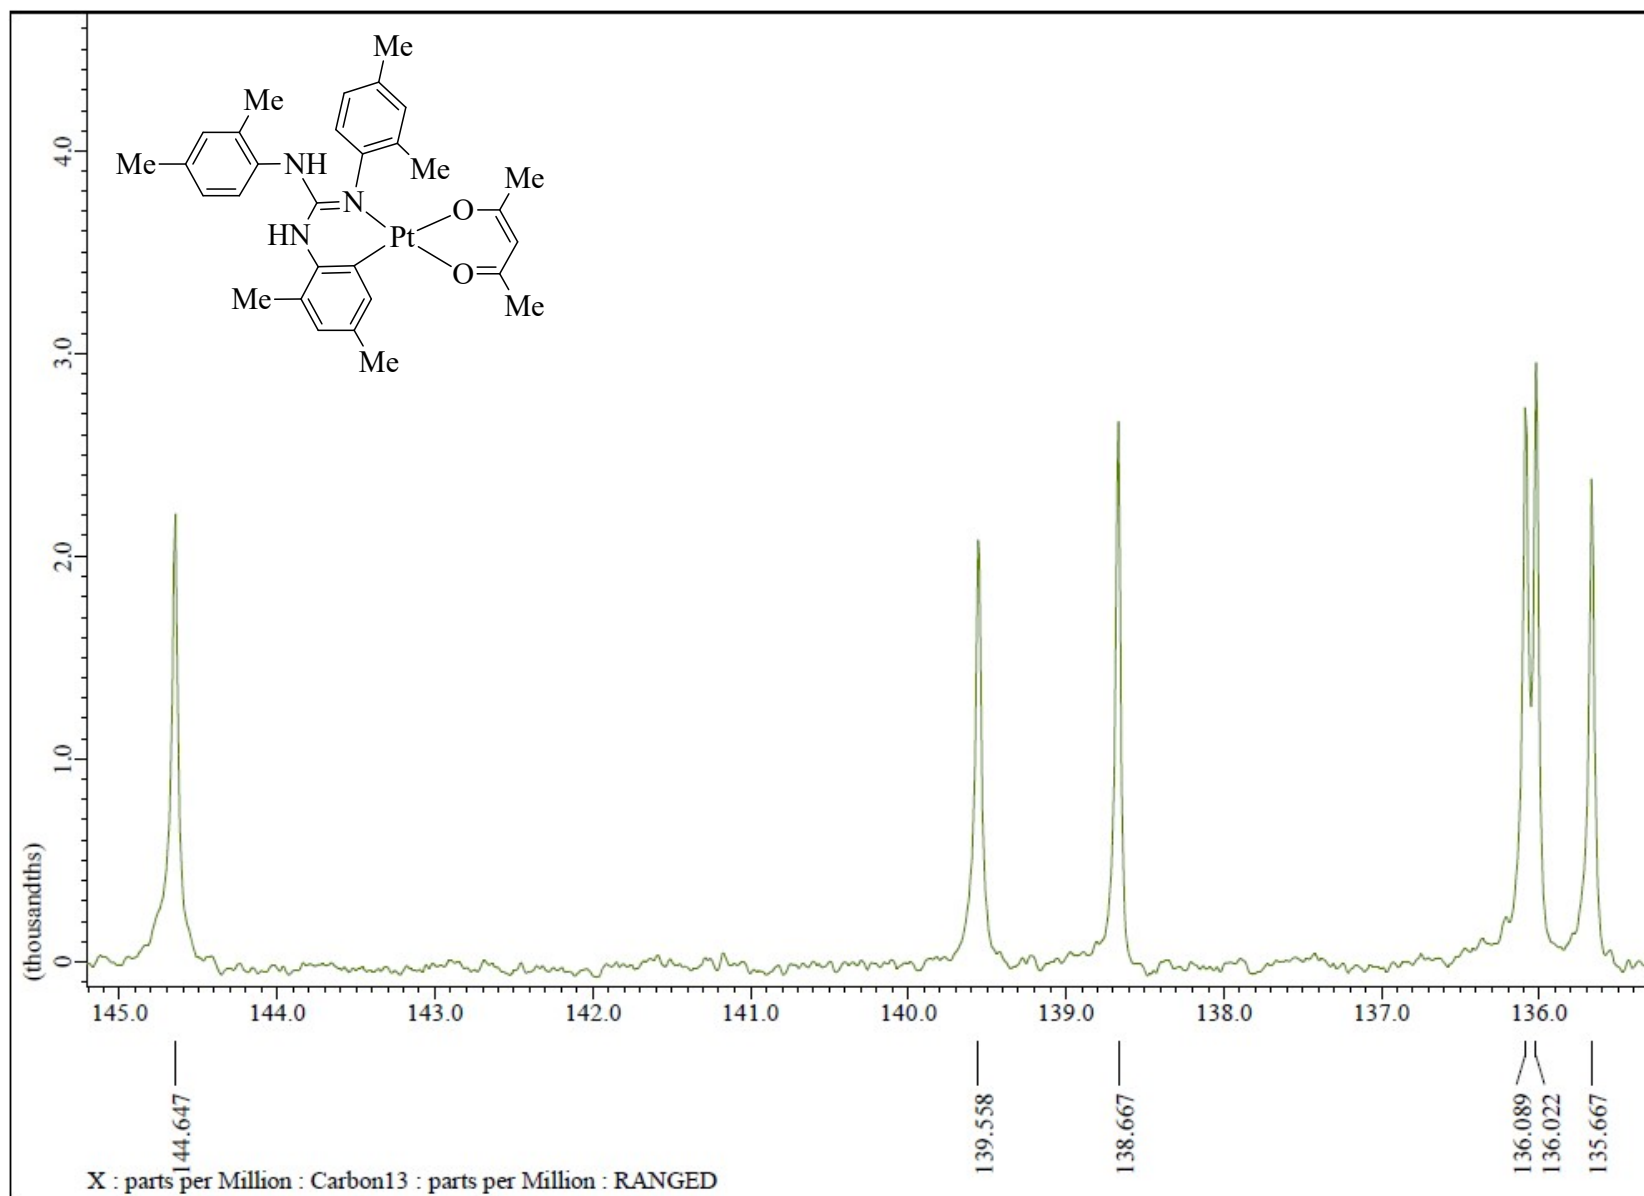

Fig. S112  $^{13}\text{C}\{^1\text{H}\}$  NMR (CDCl<sub>3</sub>, 100.5 MHz) spectrum of **13** in the indicated region.

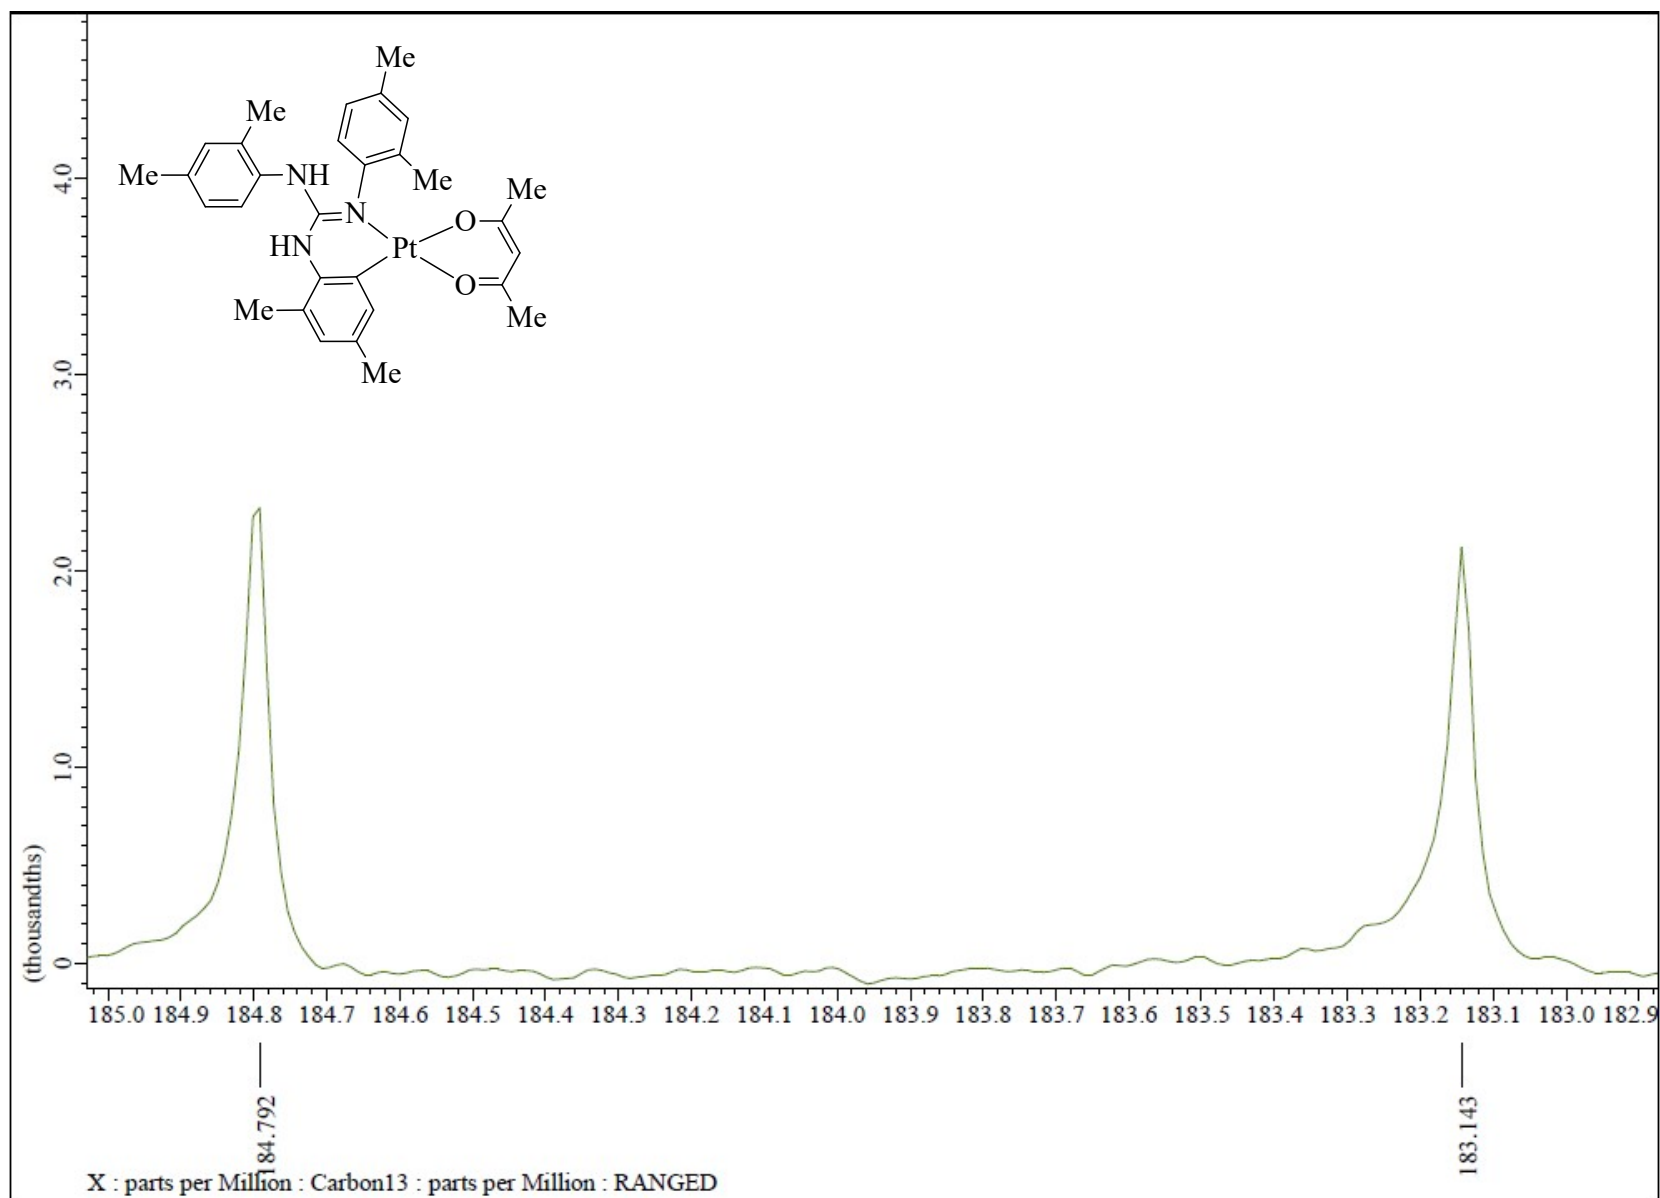

Fig. S113  $^{13}\text{C}\{^1\text{H}\}$  NMR ( $\text{CDCl}_3$ , 100.5 MHz) spectrum of **13** in the indicated region.

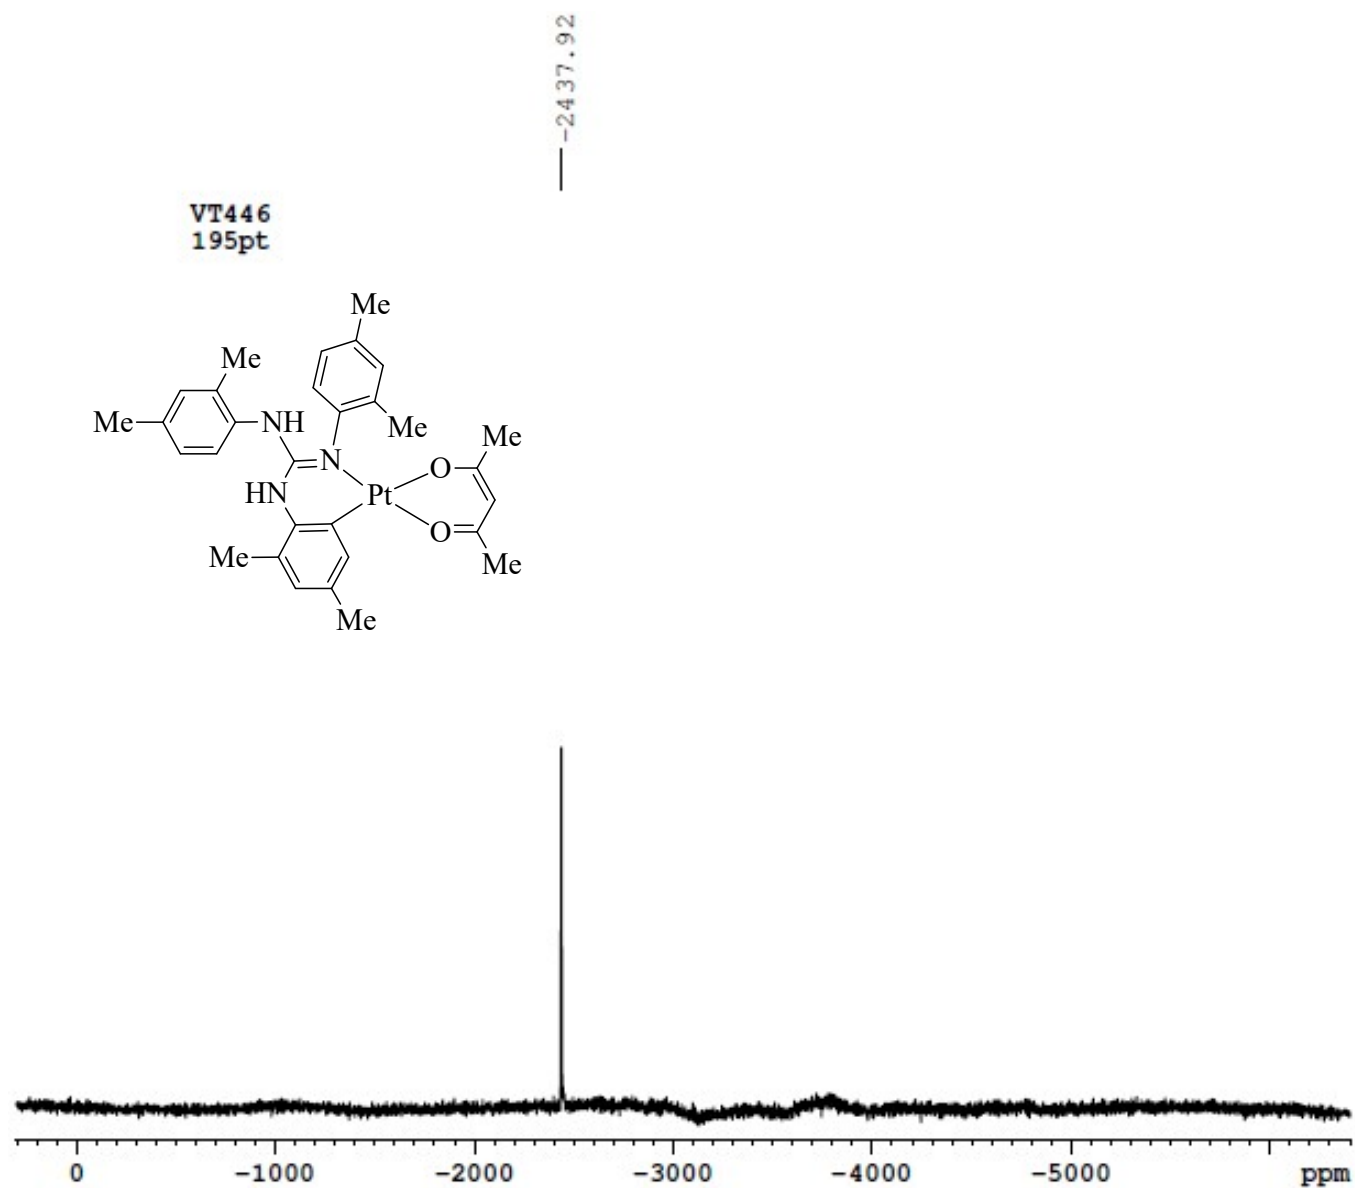

Fig. S114  $^{195}\text{Pt}\{^1\text{H}\}$  NMR ( $\text{CDCl}_3$ , 85.8 MHz) spectrum of **13**.

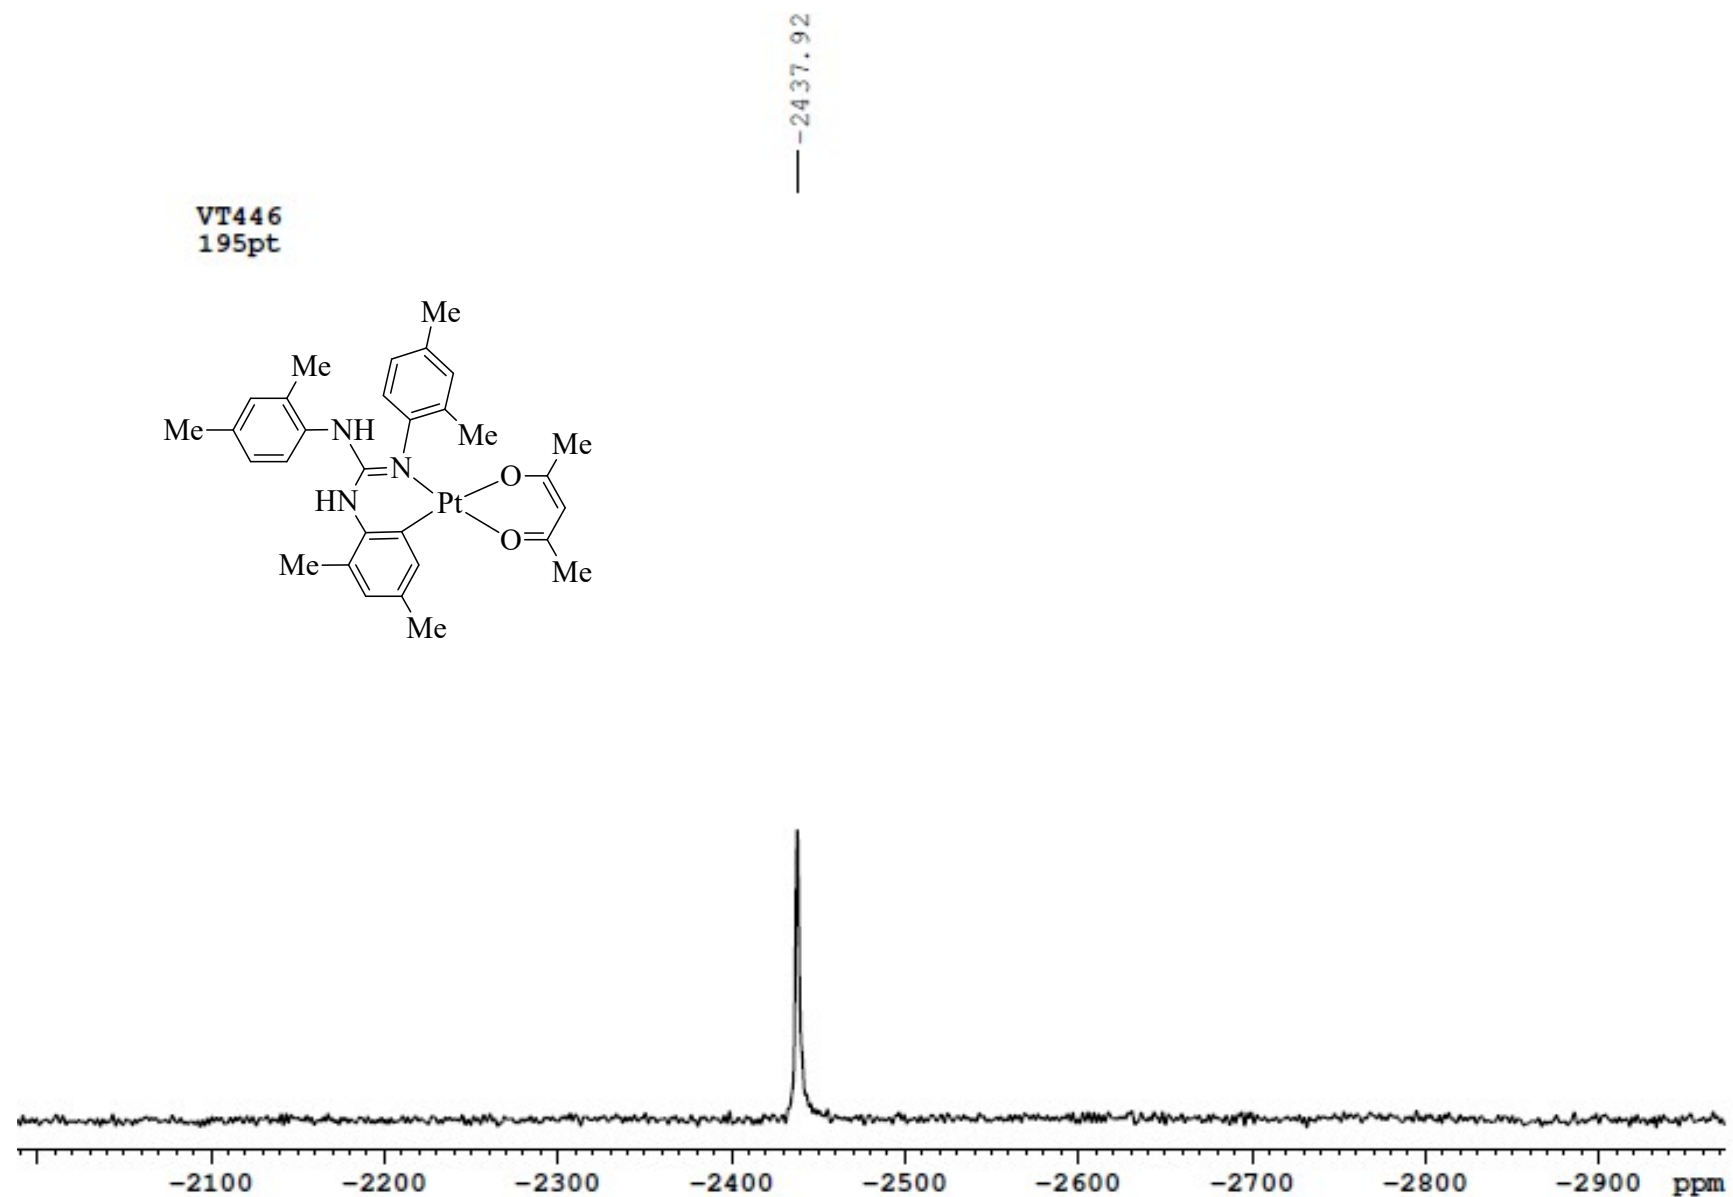

Fig. S115  $^{195}\text{Pt}\{^1\text{H}\}$  NMR ( $\text{CDCl}_3$ , 85.8 MHz) spectrum of **13** in the indicated region.

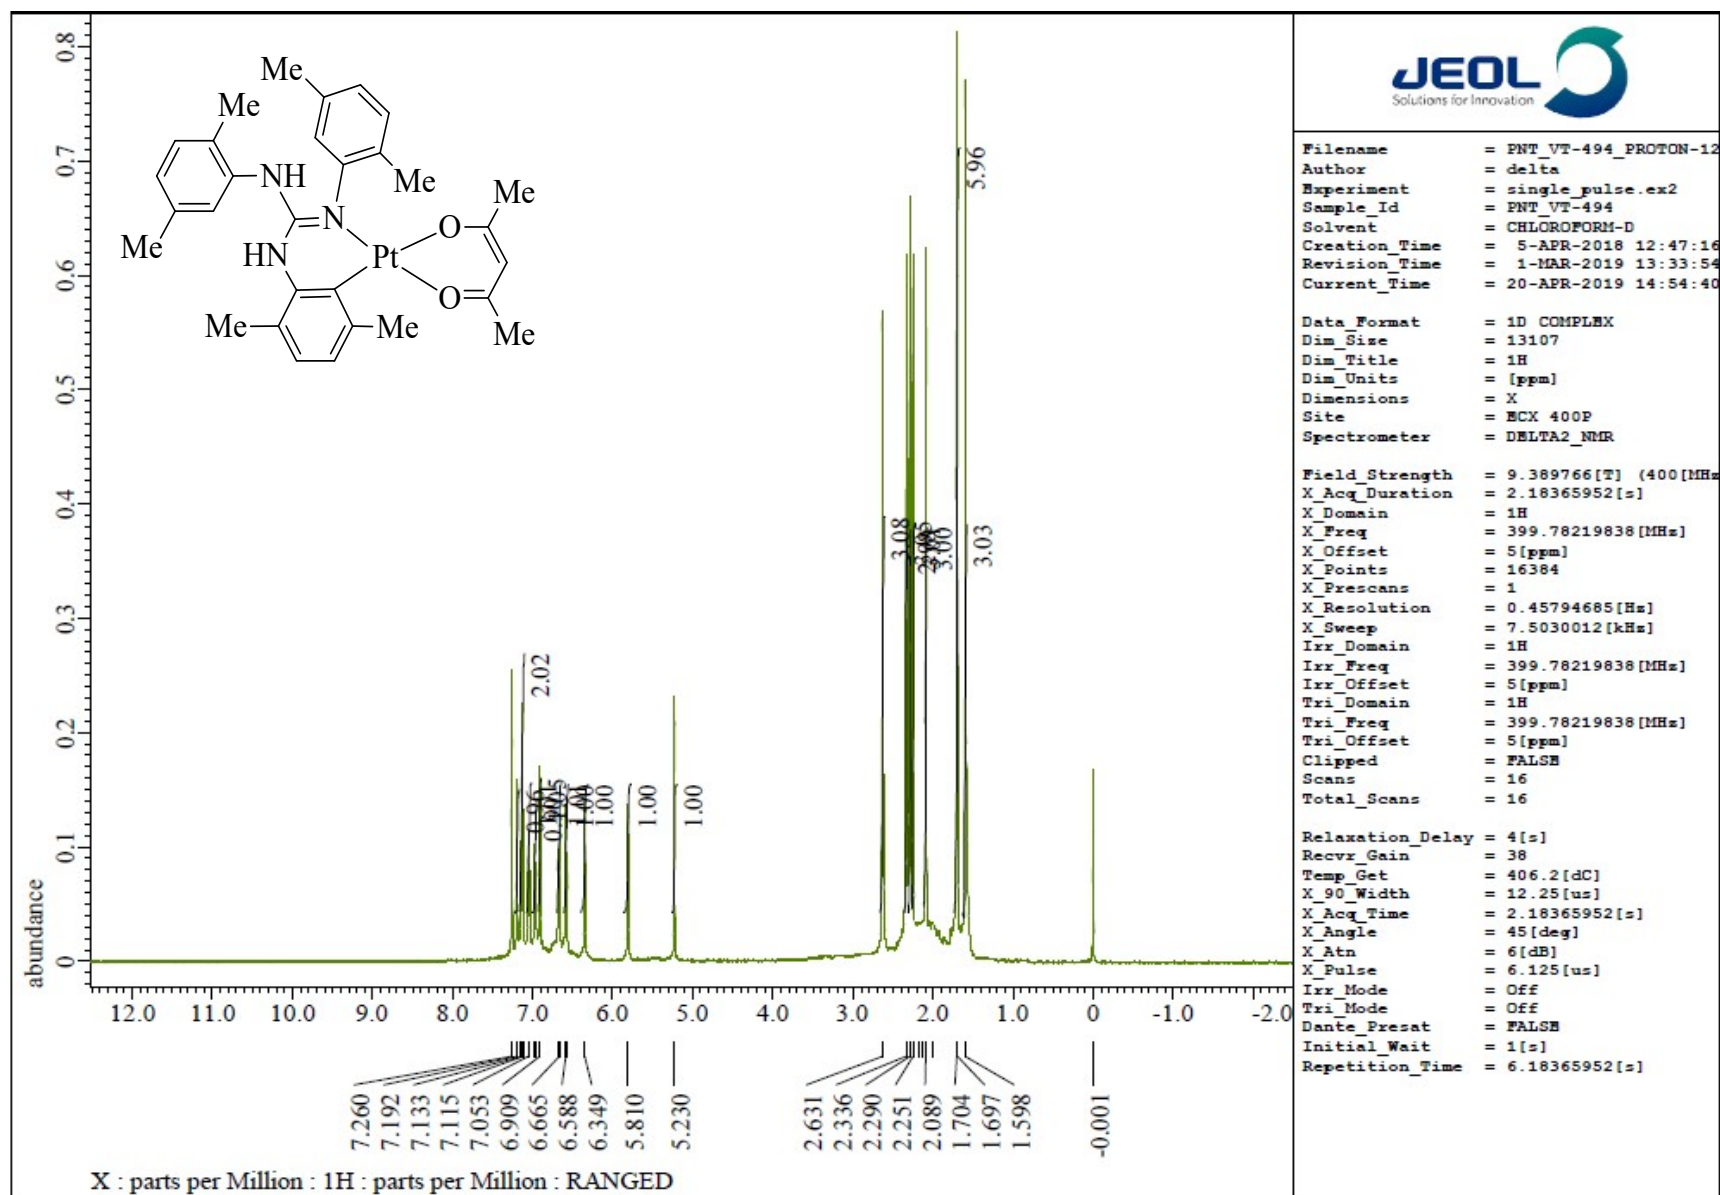

Fig. S116 <sup>1</sup>H NMR (CDCl<sub>3</sub>, 400 MHz) spectrum of 14.

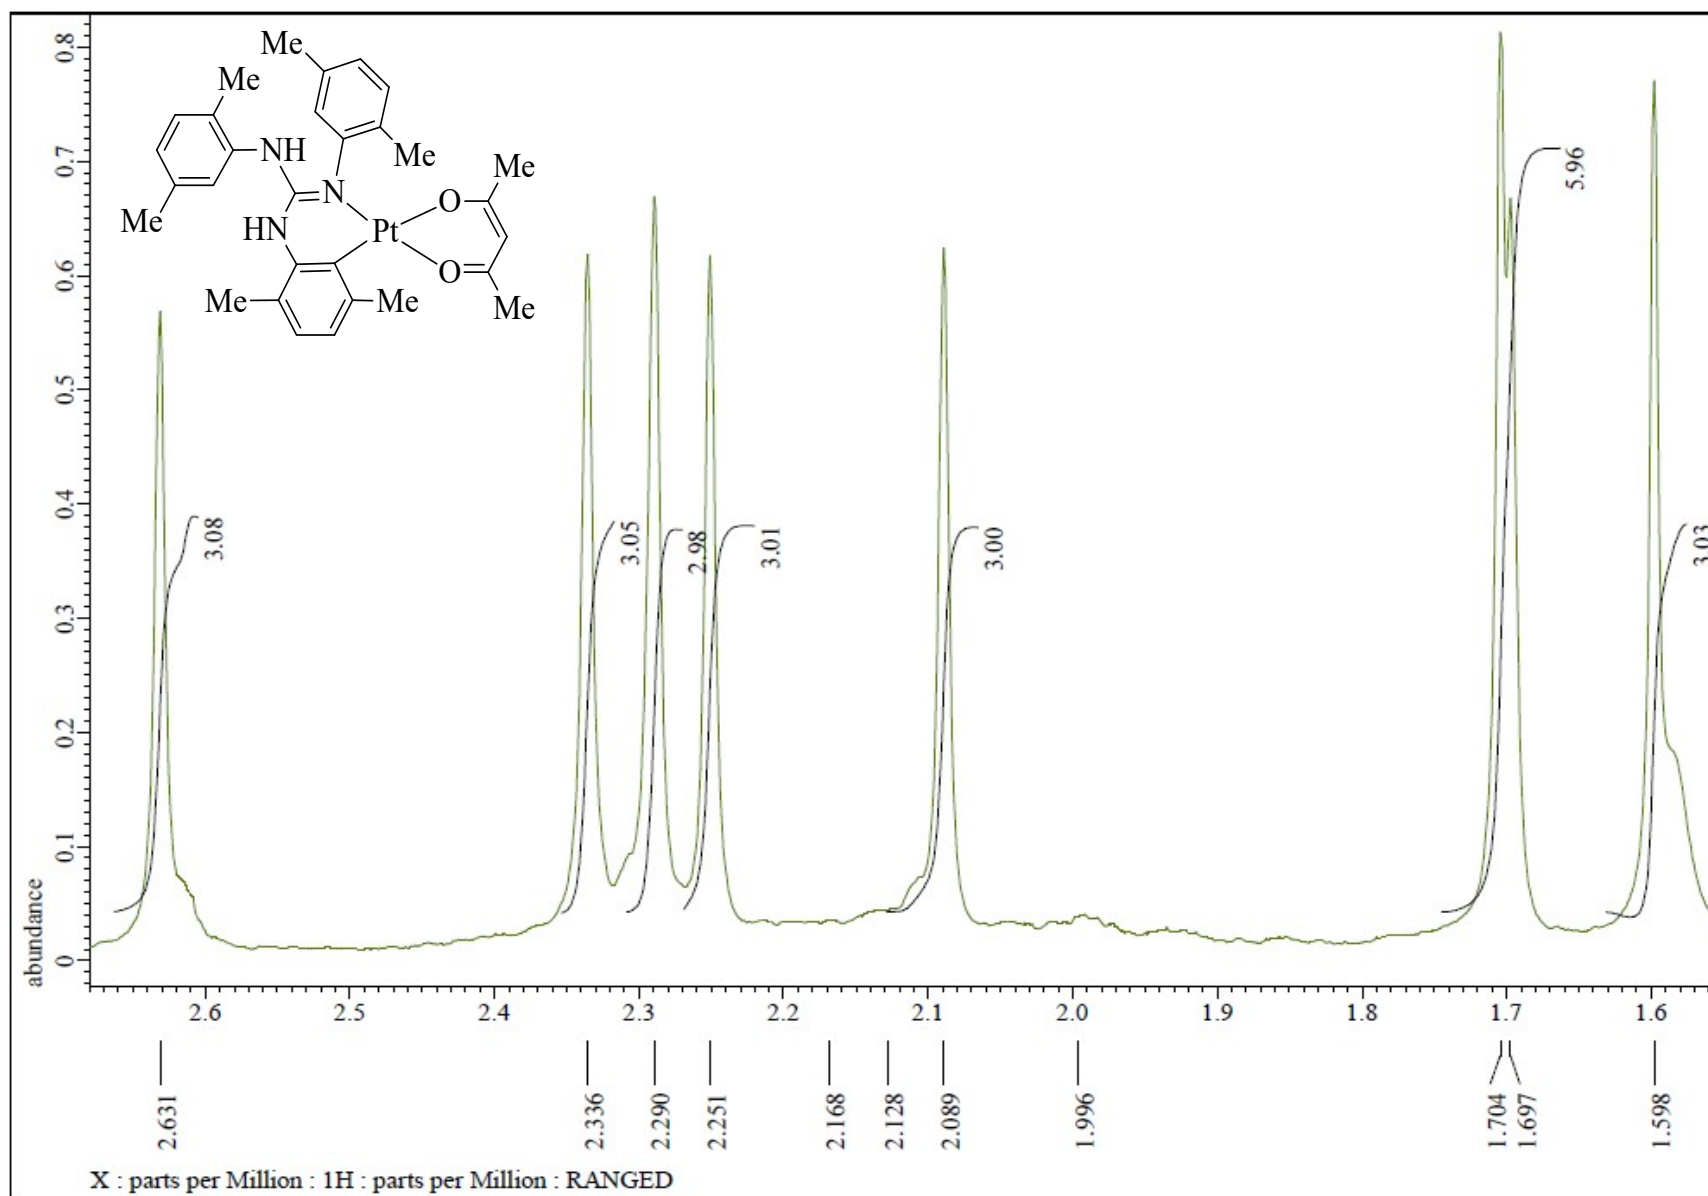

Fig. S117 <sup>1</sup>H NMR (CDCl<sub>3</sub>, 400 MHz) spectrum of **14** in the indicated region.

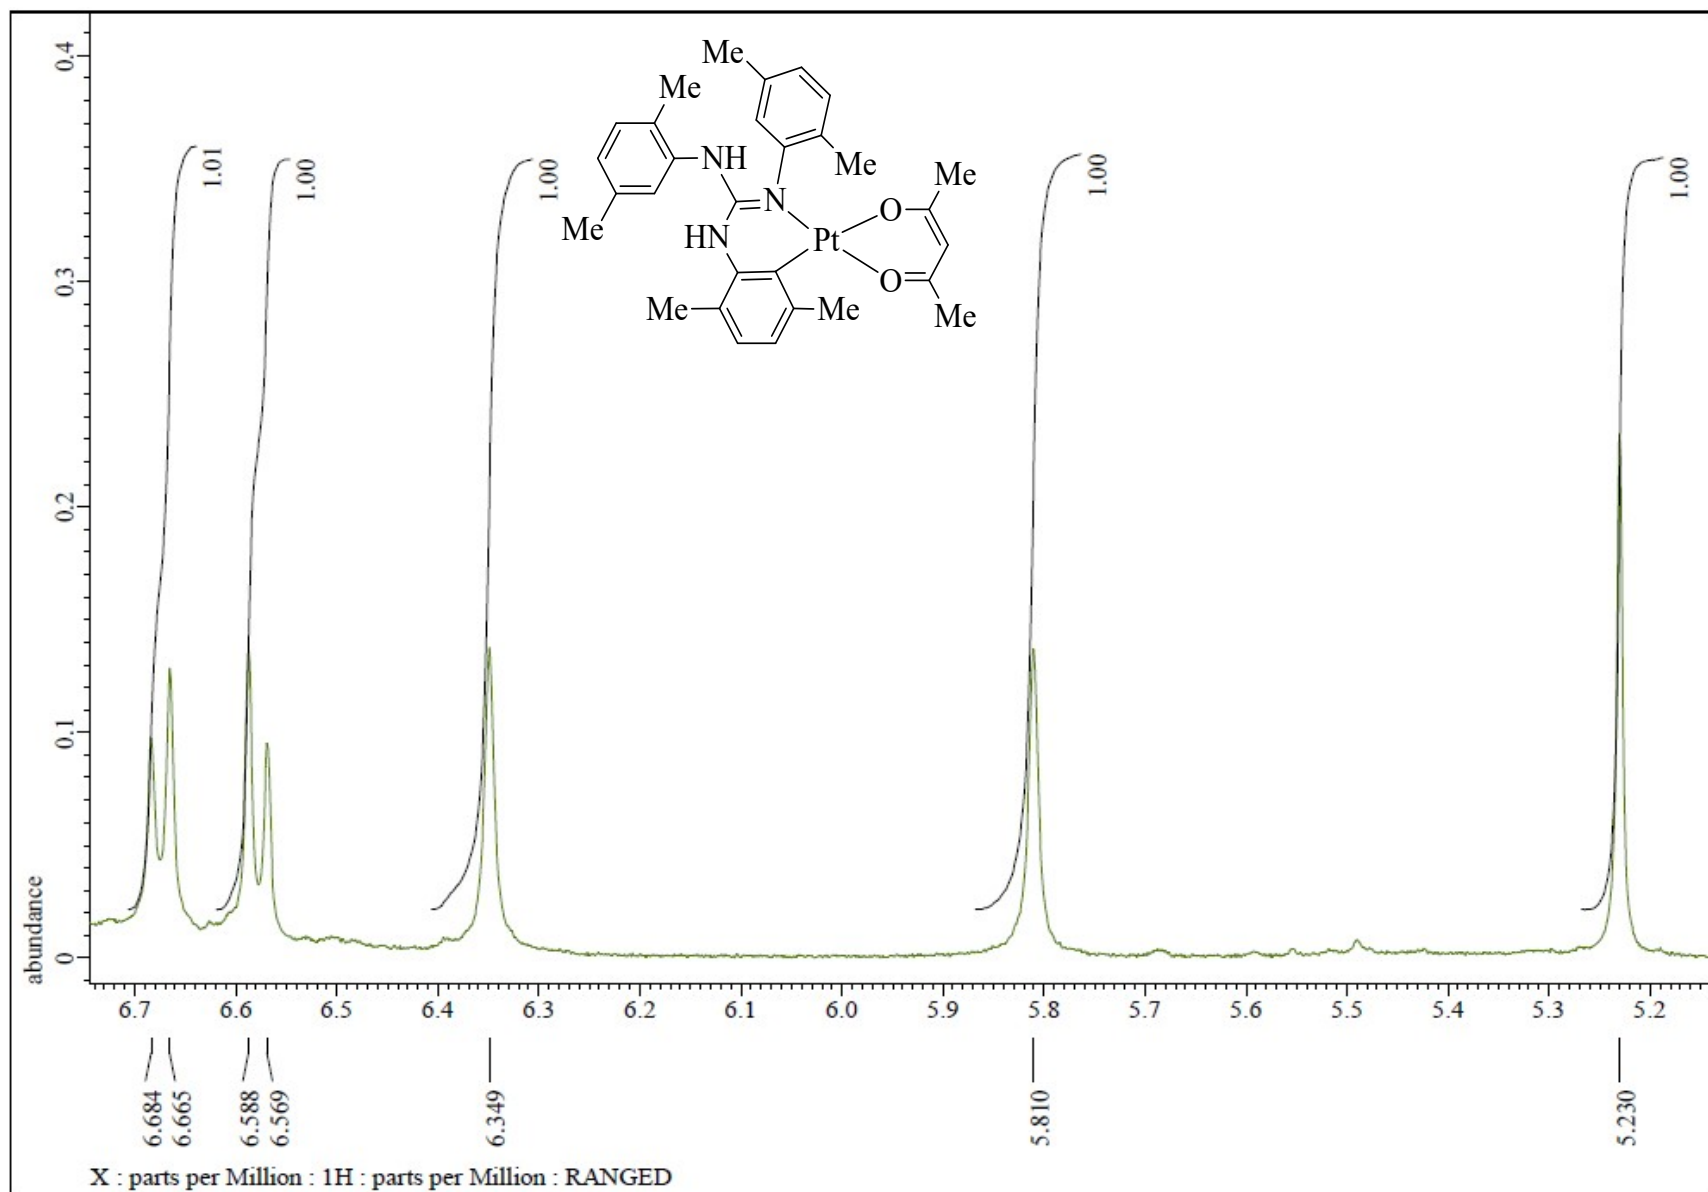

Fig. S118  $^1\text{H}$  NMR ( $\text{CDCl}_3$ , 400 MHz) spectrum of **14** in the indicated region.



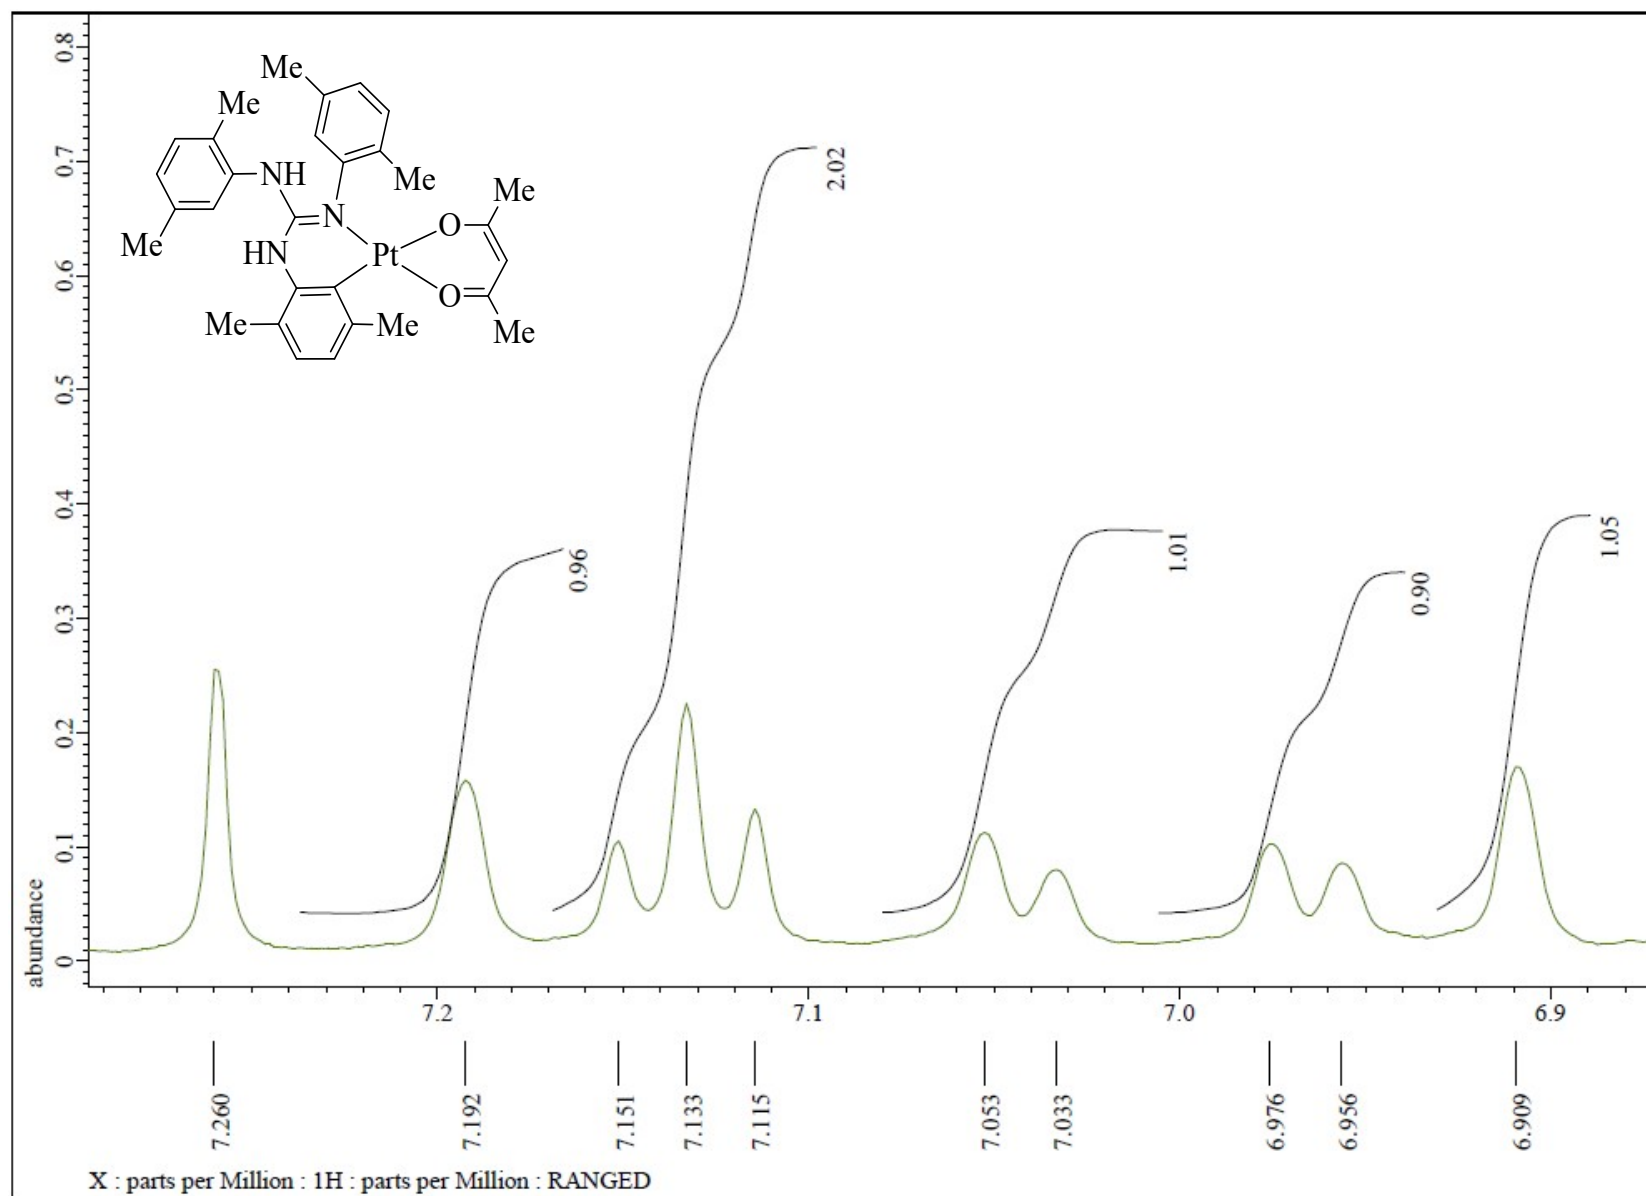

Fig. S119 <sup>1</sup>H NMR (CDCl<sub>3</sub>, 400 MHz) spectrum of **14** in the indicated region.

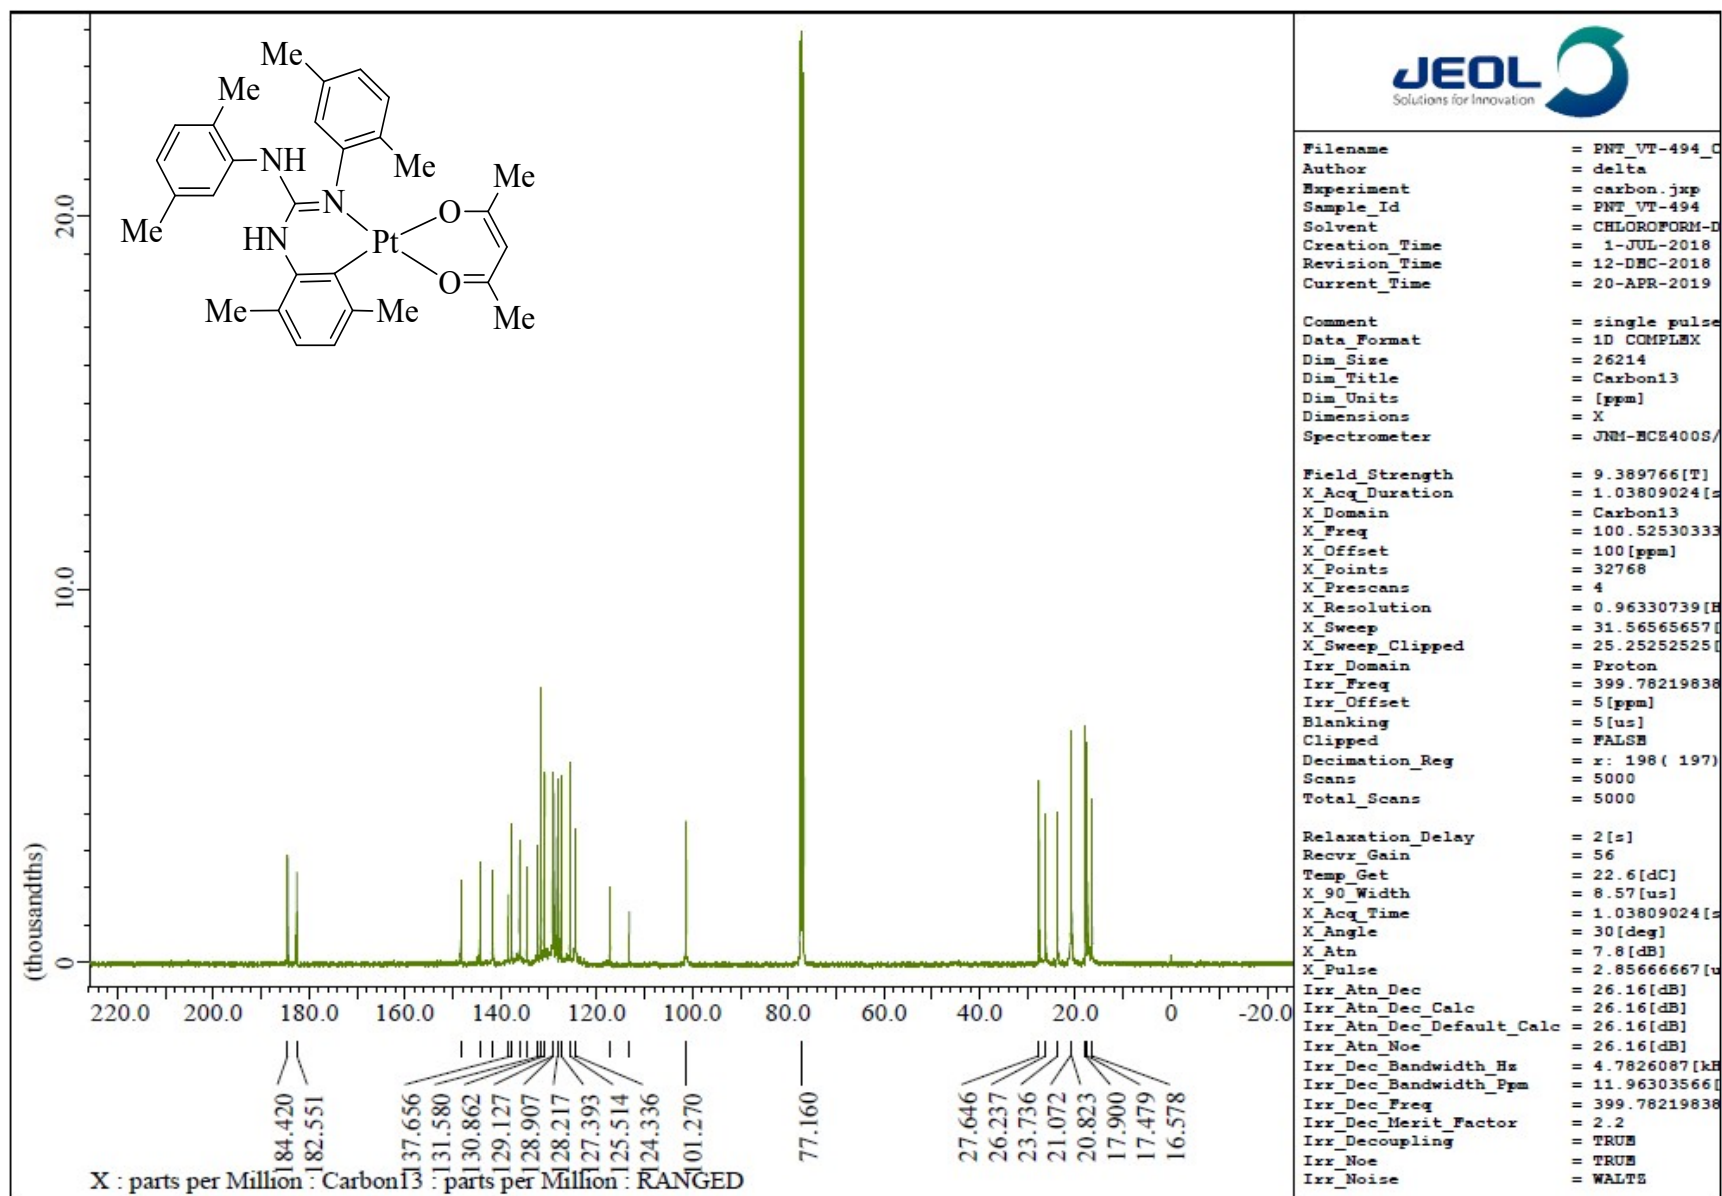

| JEOL<br>Solutions for Innovation |                     |
|----------------------------------|---------------------|
| Filename                         | = PNT_VT-494_C      |
| Author                           | = delta             |
| Experiment                       | = carbon.jsp        |
| Sample_Id                        | = PNT_VT-494        |
| Solvent                          | = CHLOROFORM-D      |
| Creation_Time                    | = 1-JUL-2018        |
| Revision_Time                    | = 12-DEC-2018       |
| Current_Time                     | = 20-APR-2019       |
| Comment                          | = single pulse      |
| Data_Format                      | = 1D COMPLEX        |
| Dim_Size                         | = 26214             |
| Dim_Title                        | = Carbon13          |
| Dim_Units                        | = [ppm]             |
| Dimensions                       | = X                 |
| Spectrometer                     | = JNM-ECE400S/      |
| Field_Strength                   | = 9.389766[T]       |
| X_Acq_Duration                   | = 1.03809024[s]     |
| X_Domain                         | = Carbon13          |
| X_Freq                           | = 100.52530333      |
| X_Offset                         | = 100 [ppm]         |
| X_Points                         | = 32768             |
| X_Prescans                       | = 4                 |
| X_Resolution                     | = 0.96330739[H]     |
| X_Sweep                          | = 31.56565657[H]    |
| X_Sweep_Clipped                  | = 25.25252525[H]    |
| Ixx_Domain                       | = Proton            |
| Ixx_Freq                         | = 399.78219838      |
| Ixx_Offset                       | = 5 [ppm]           |
| Blanking                         | = 5 [us]            |
| Clipped                          | = FALSE             |
| Decimation_Reg                   | = r: 198 ( 197)     |
| Scans                            | = 5000              |
| Total_Scans                      | = 5000              |
| Relaxation_Delay                 | = 2 [s]             |
| Recvr_Gain                       | = 56                |
| Temp_Get                         | = 22.6 [dC]         |
| X_90_Width                       | = 8.57 [us]         |
| X_Acq_Time                       | = 1.03809024[s]     |
| X_Angle                          | = 30 [deg]          |
| X_Atn                            | = 7.8 [dB]          |
| X_Pulse                          | = 2.85666667 [us]   |
| Ixx_Atn_Dec                      | = 26.16 [dB]        |
| Ixx_Atn_Dec_Calc                 | = 26.16 [dB]        |
| Ixx_Atn_Dec_Default_Calc         | = 26.16 [dB]        |
| Ixx_Atn_Noise                    | = 26.16 [dB]        |
| Ixx_Dec_Bandwidth_Hz             | = 4.7826087 [kHz]   |
| Ixx_Dec_Bandwidth_Ppm            | = 11.96303566 [ppm] |
| Ixx_Dec_Freq                     | = 399.78219838      |
| Ixx_Dec_Merit_Factor             | = 2.2               |
| Ixx_Decoupling                   | = TRUE              |
| Ixx_Noise                        | = TRUE              |
| Ixx_Noise                        | = WALTER            |

Fig. S120 <sup>13</sup>C {<sup>1</sup>H} NMR (CDCl<sub>3</sub>, 100.5 MHz) spectrum of 14.

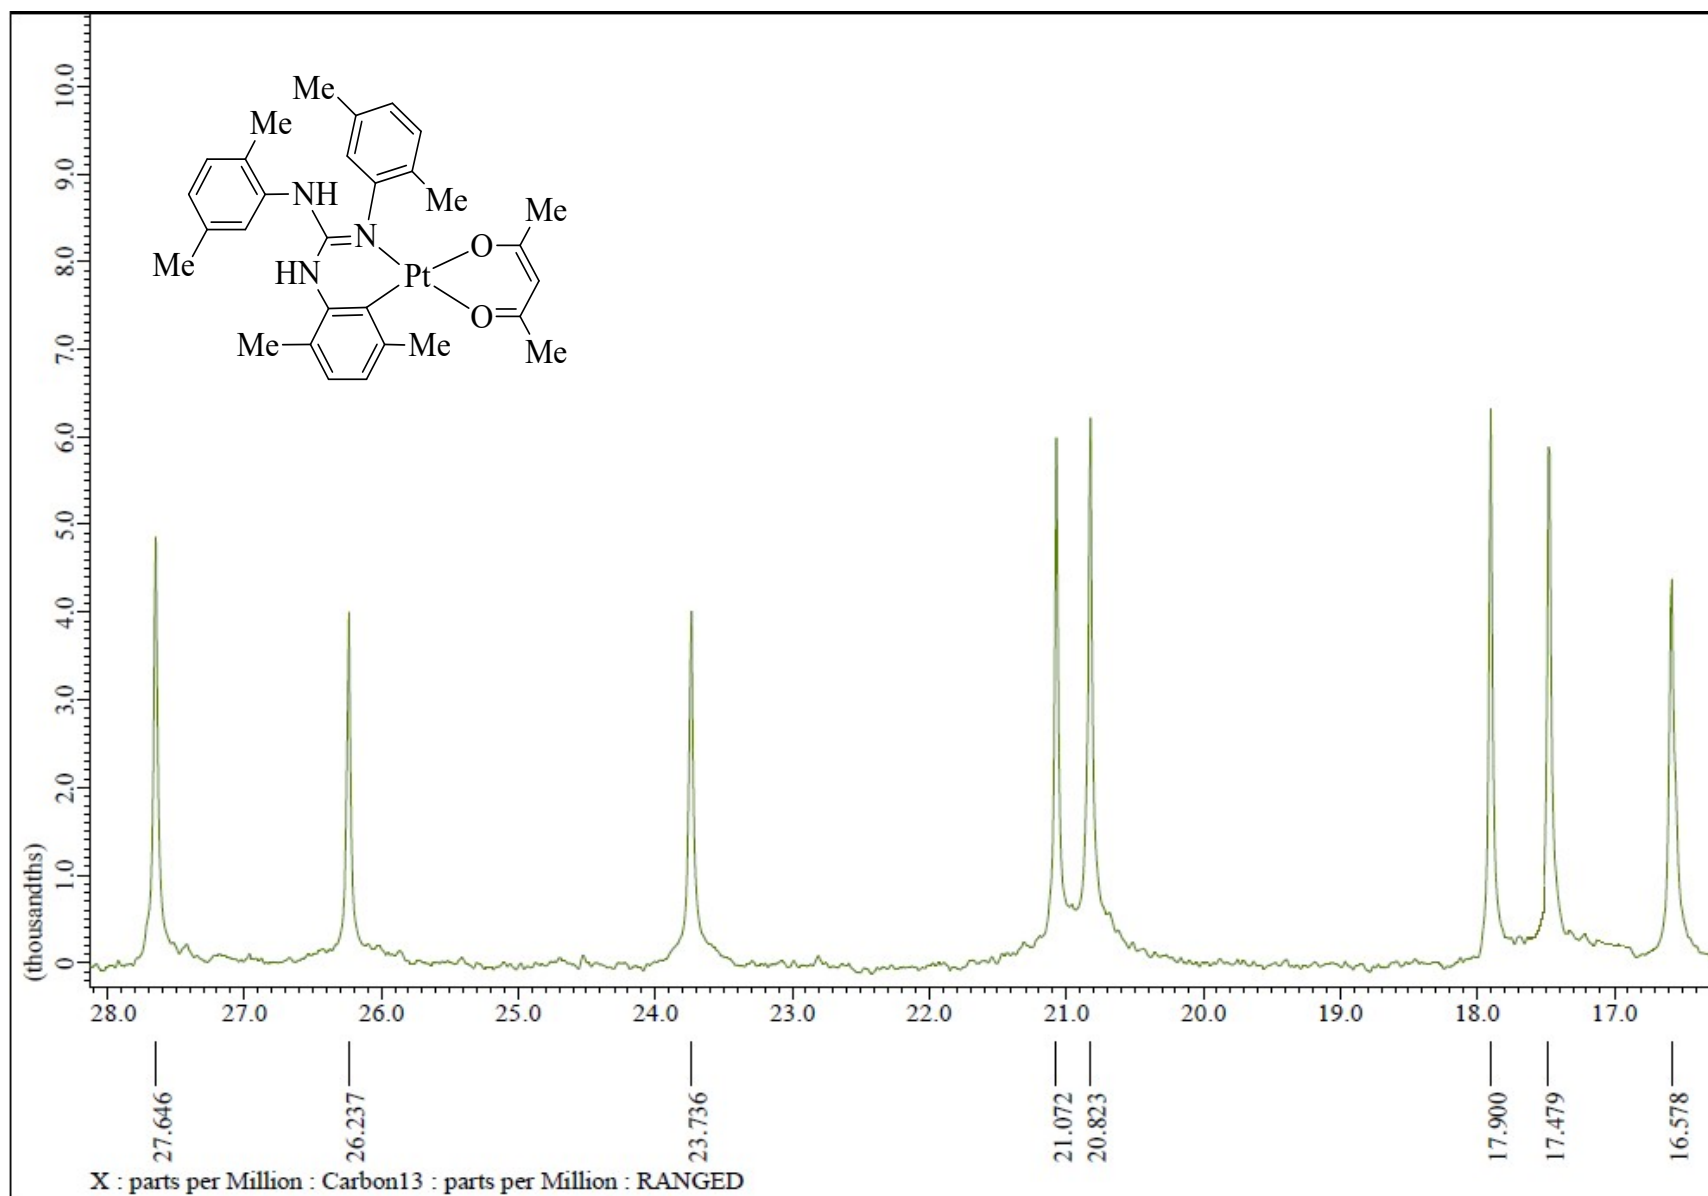

Fig. S121  $^{13}\text{C}\{^1\text{H}\}$  NMR ( $\text{CDCl}_3$ , 100.5 MHz) spectrum of **14** in the indicated region.

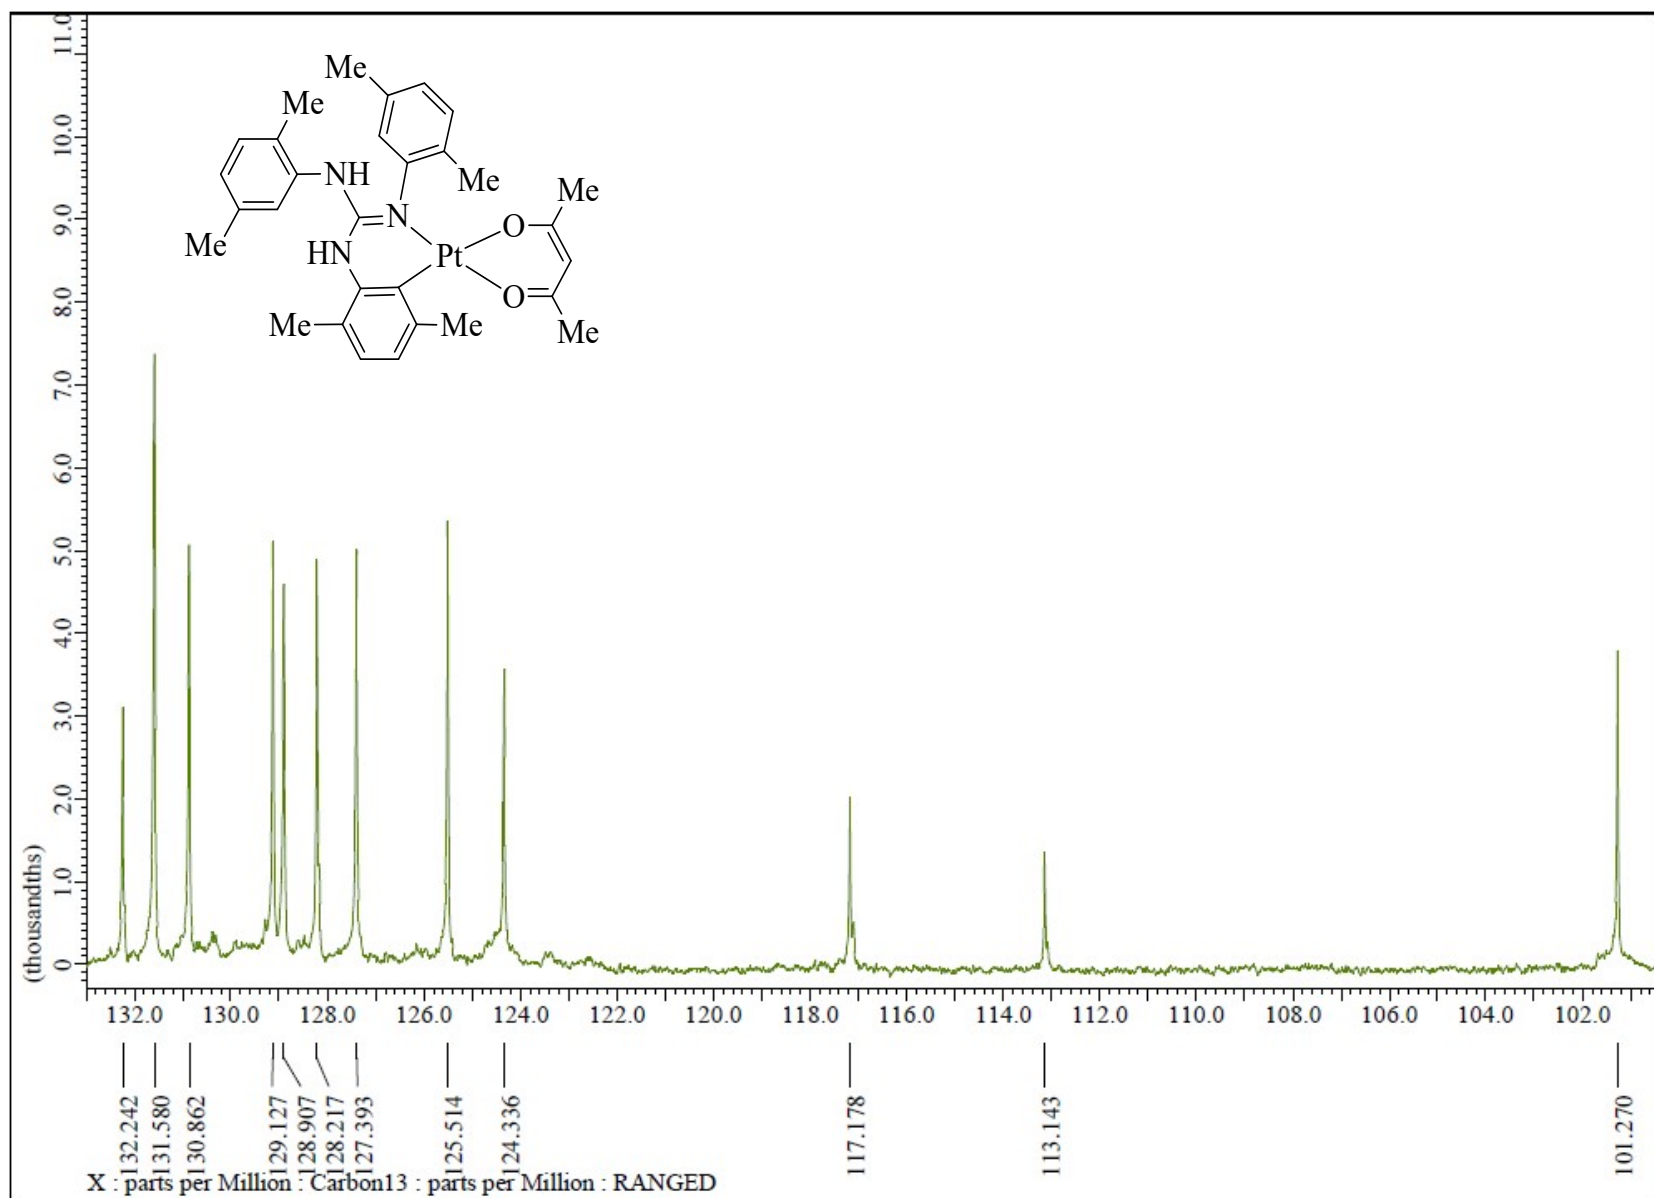

Fig. S122  $^{13}\text{C}$   $\{^1\text{H}\}$  NMR ( $\text{CDCl}_3$ , 100.5 MHz) spectrum of **14** in the indicated region.

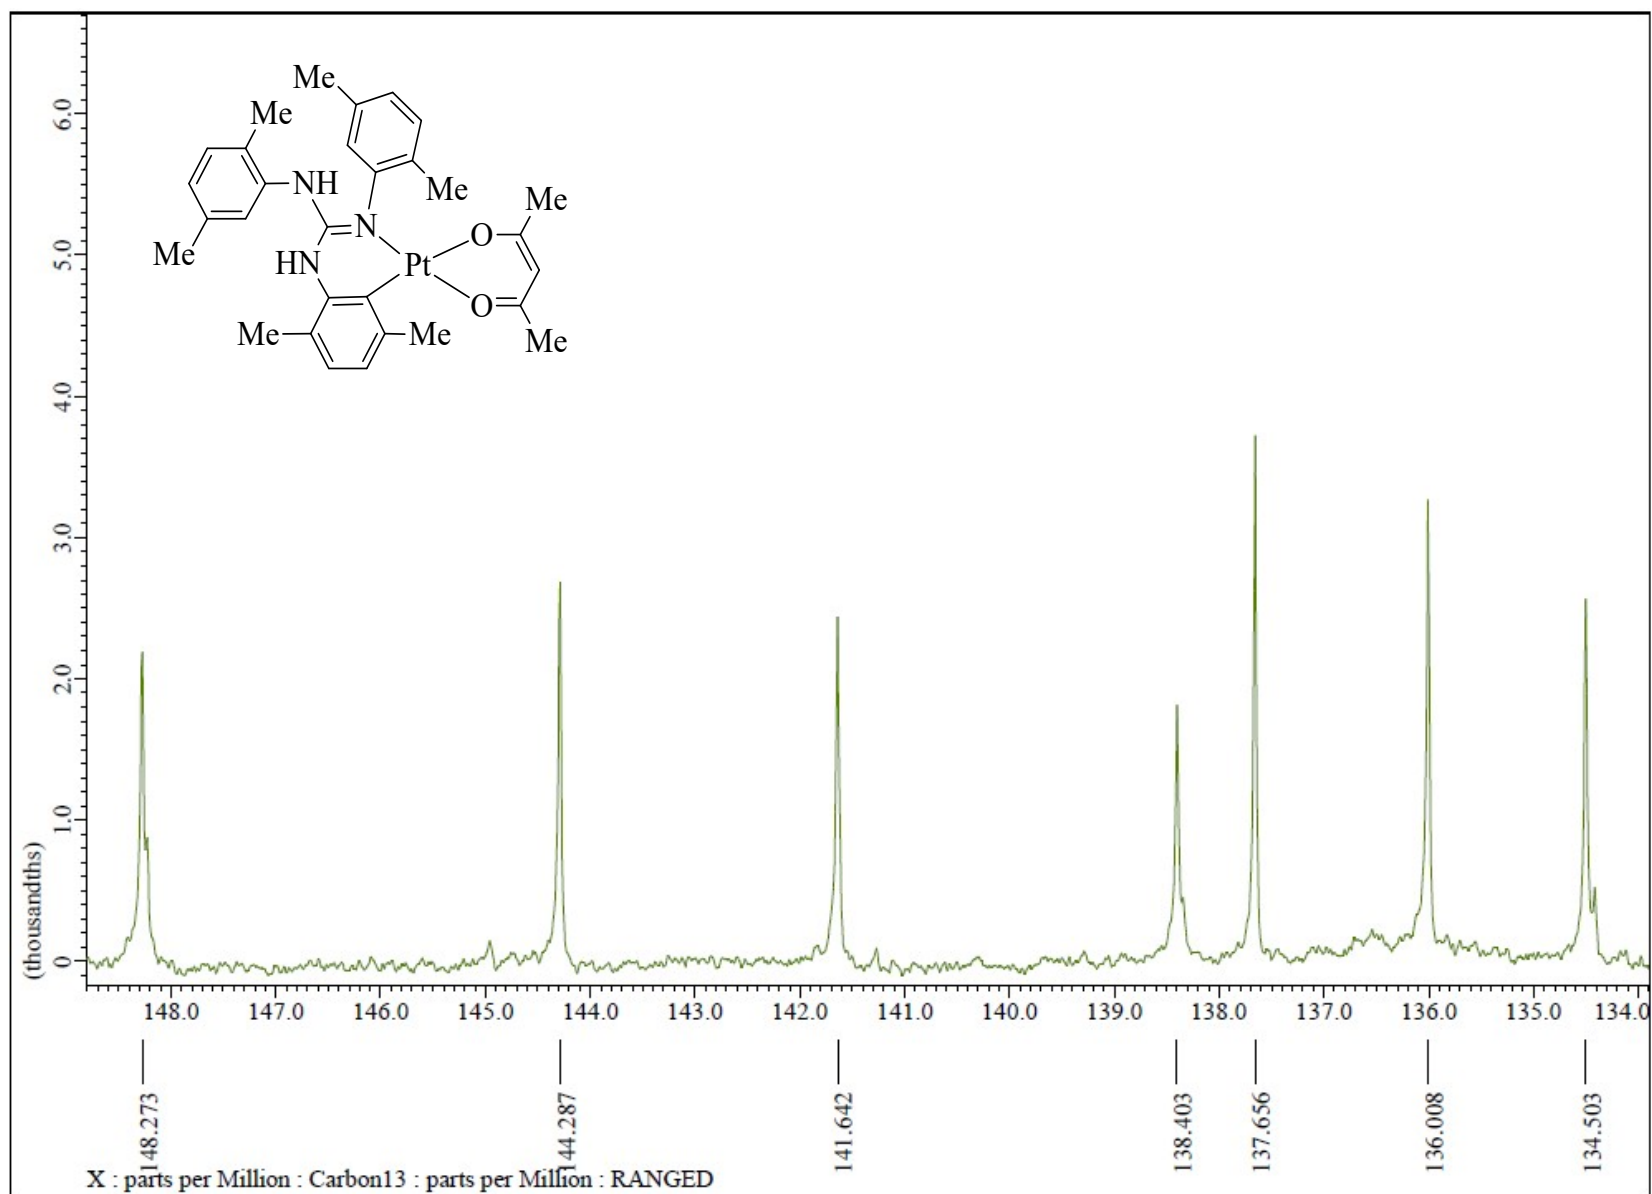

Fig. S123  $^{13}\text{C}\{^1\text{H}\}$  NMR ( $\text{CDCl}_3$ , 100.5 MHz) spectrum of **14** in the indicated region.

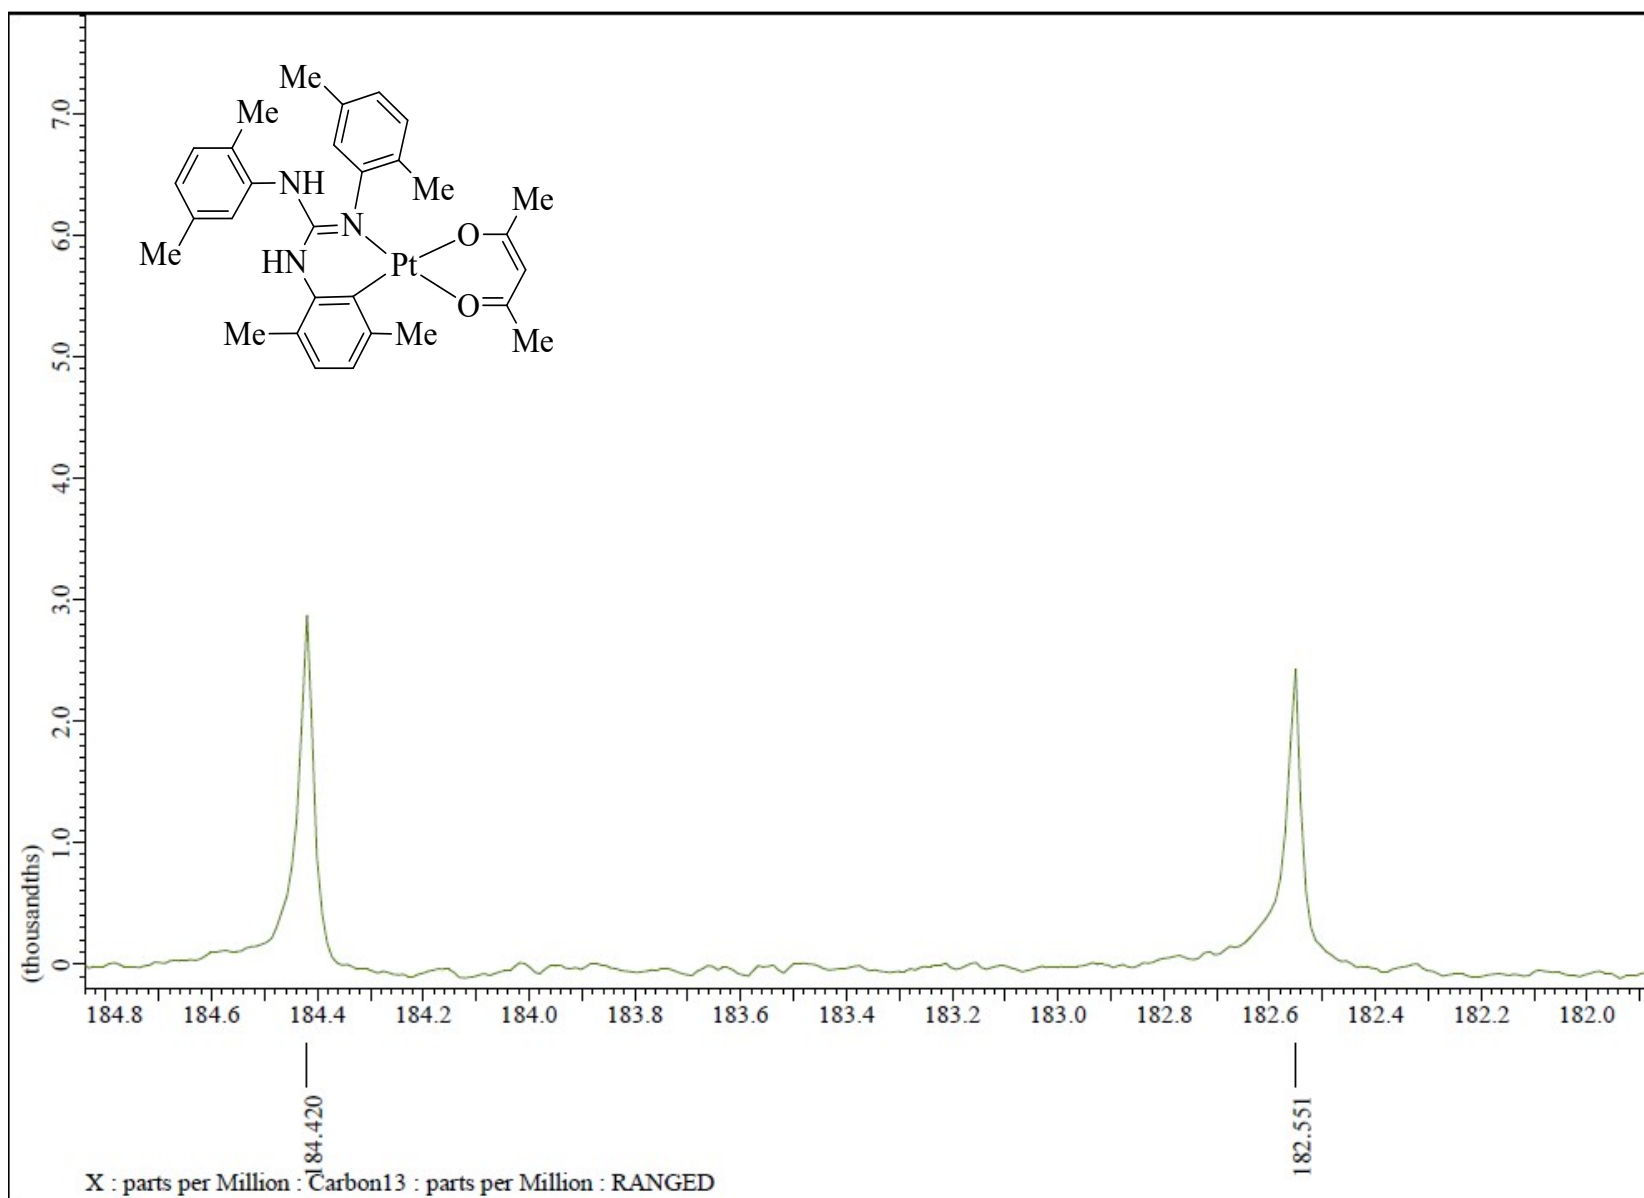

Fig. S124  $^{13}\text{C}\{^1\text{H}\}$  NMR ( $\text{CDCl}_3$ , 100.5 MHz) spectrum of **14** in the indicated region.

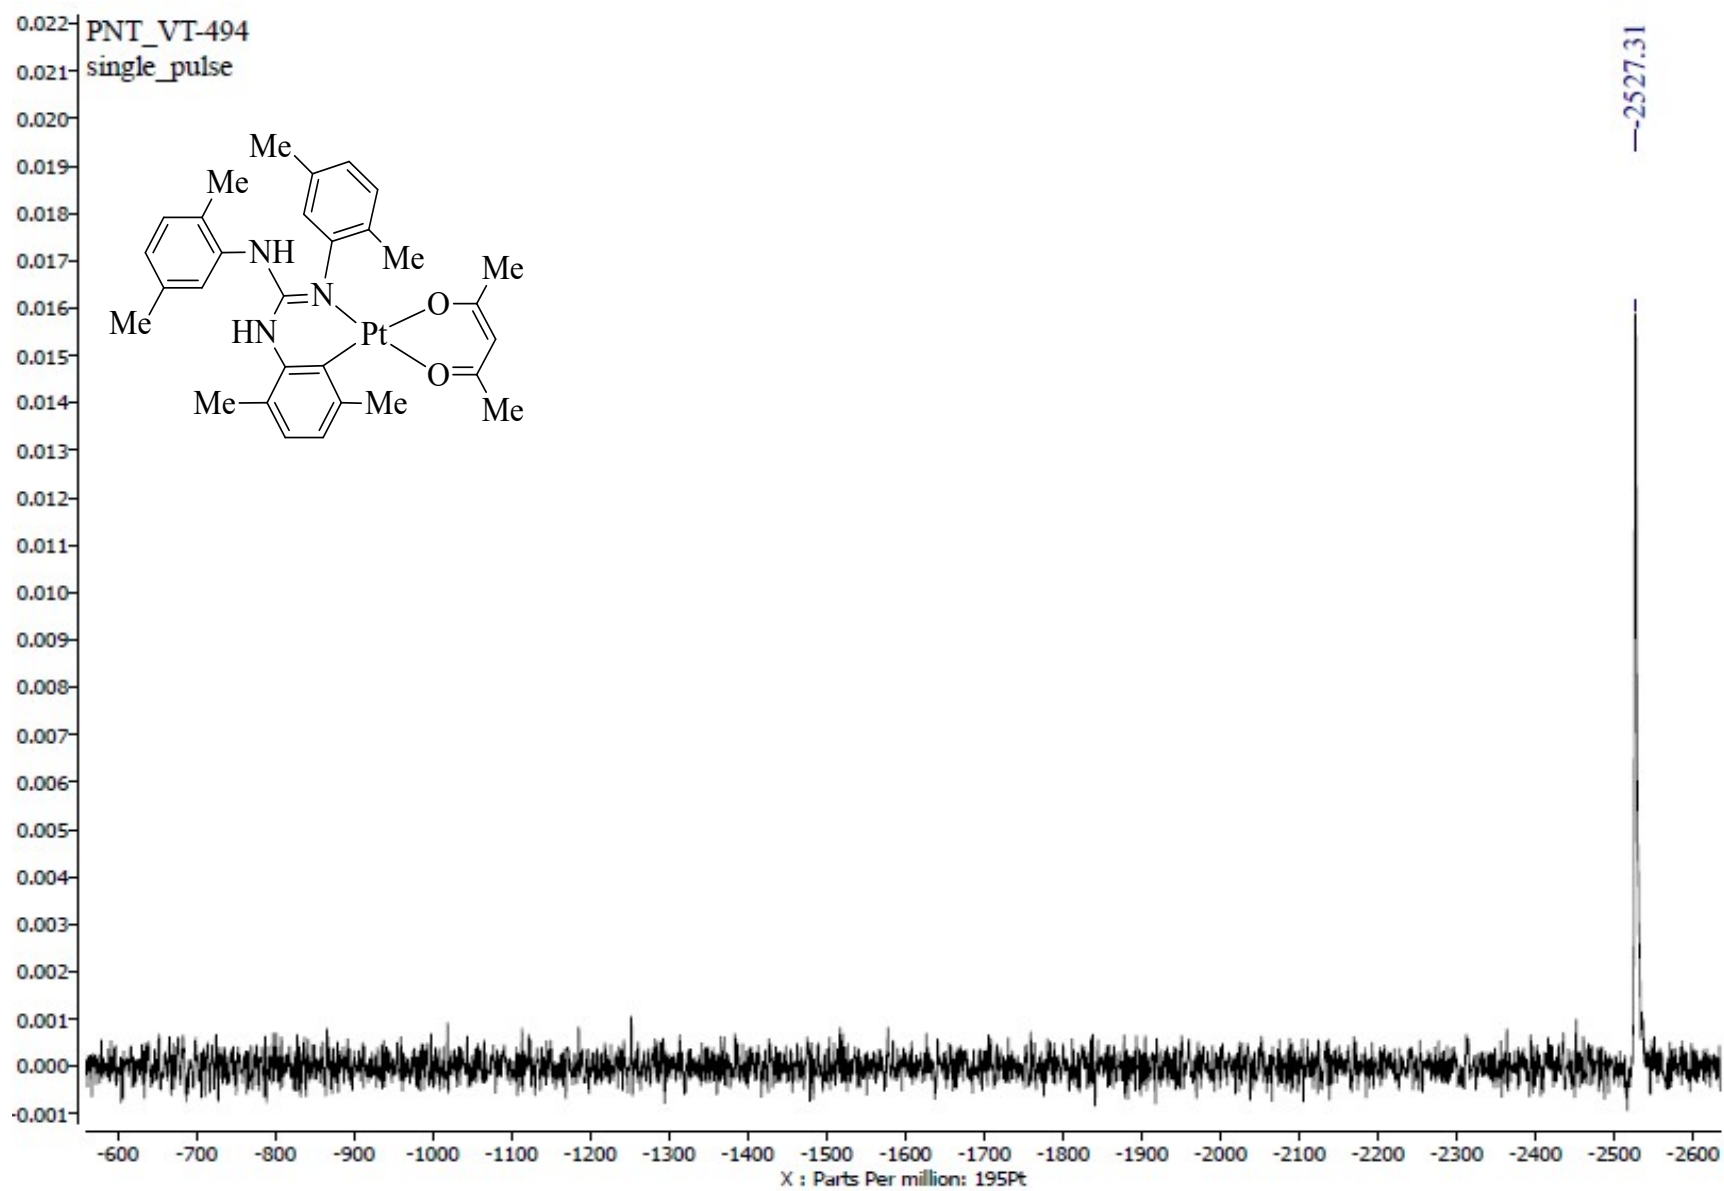

Fig. S125  $^{195}\text{Pt}\{^1\text{H}\}$  NMR ( $\text{CDCl}_3$ , 85.8 MHz) spectrum of 14.

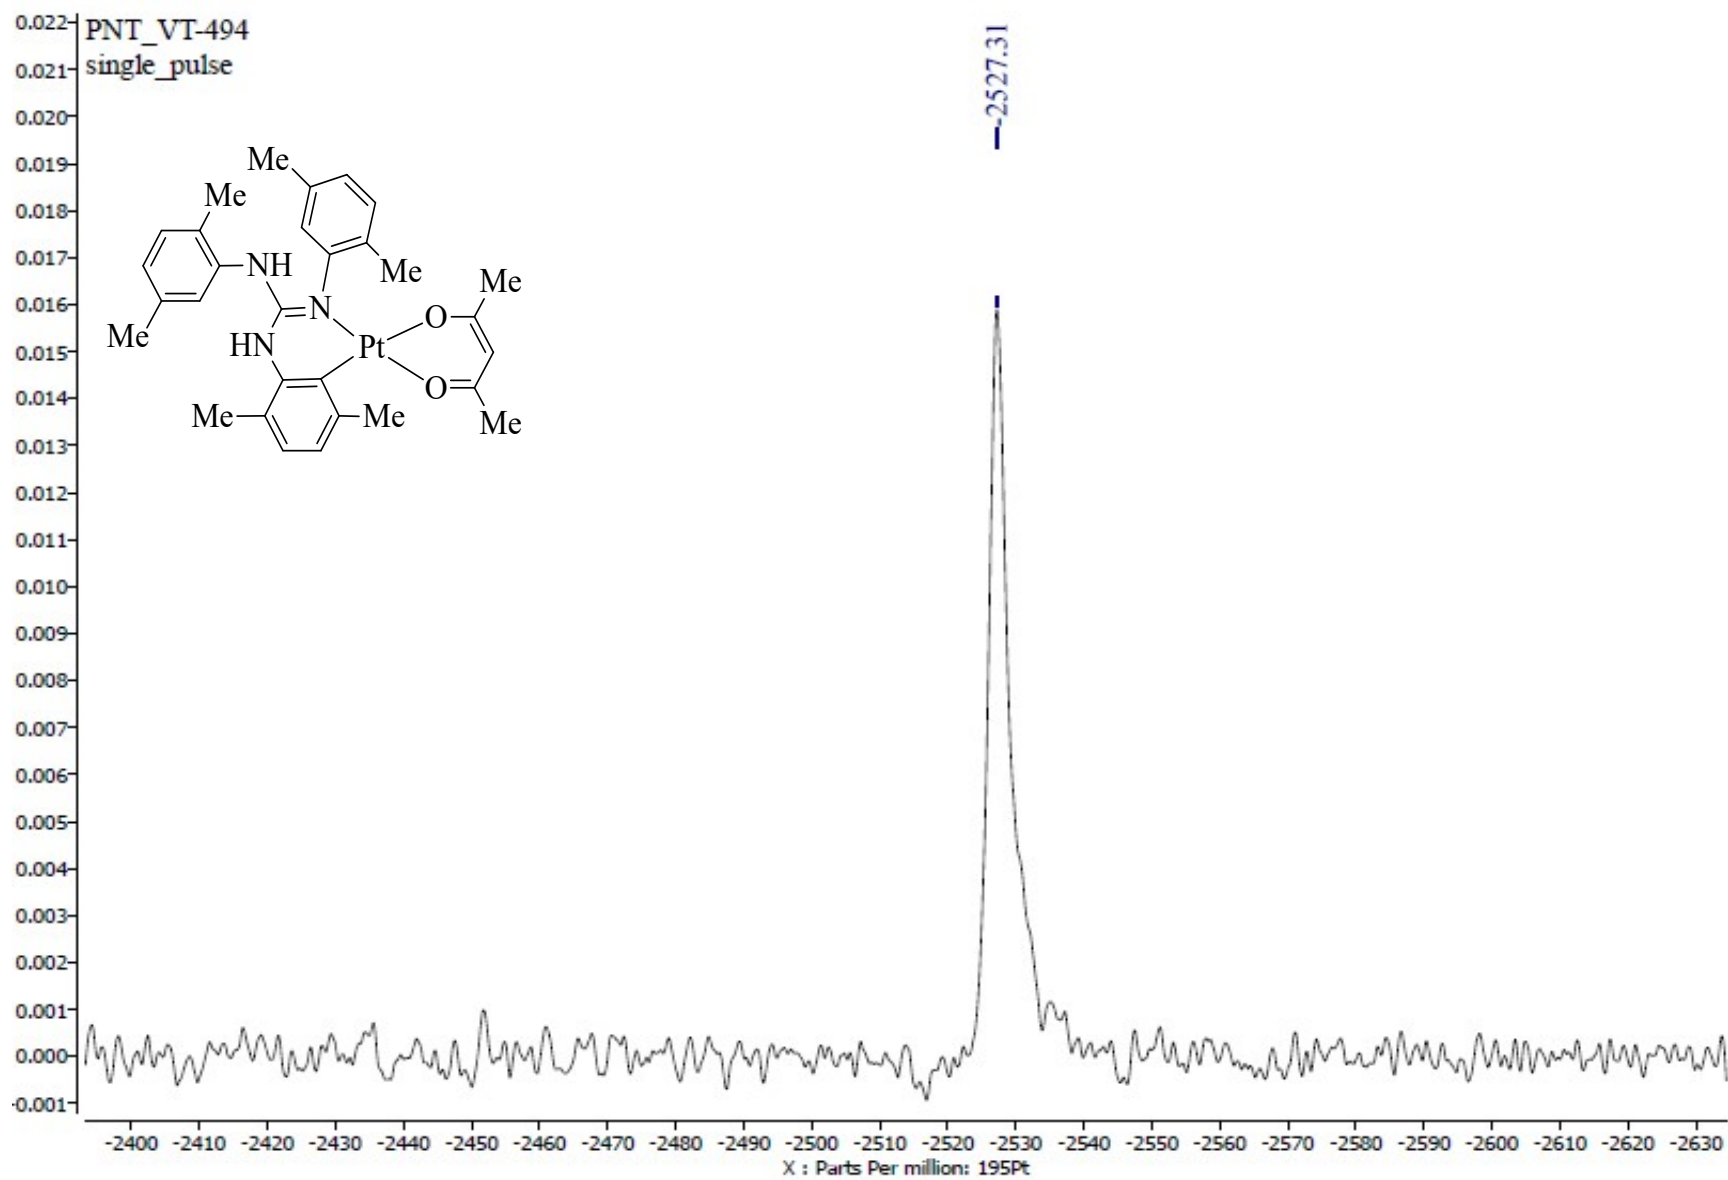

Fig. S126  $^{195}\text{Pt}\{^1\text{H}\}$  NMR ( $\text{CDCl}_3$ , 85.8 MHz) spectrum of **14** in the indicated region.



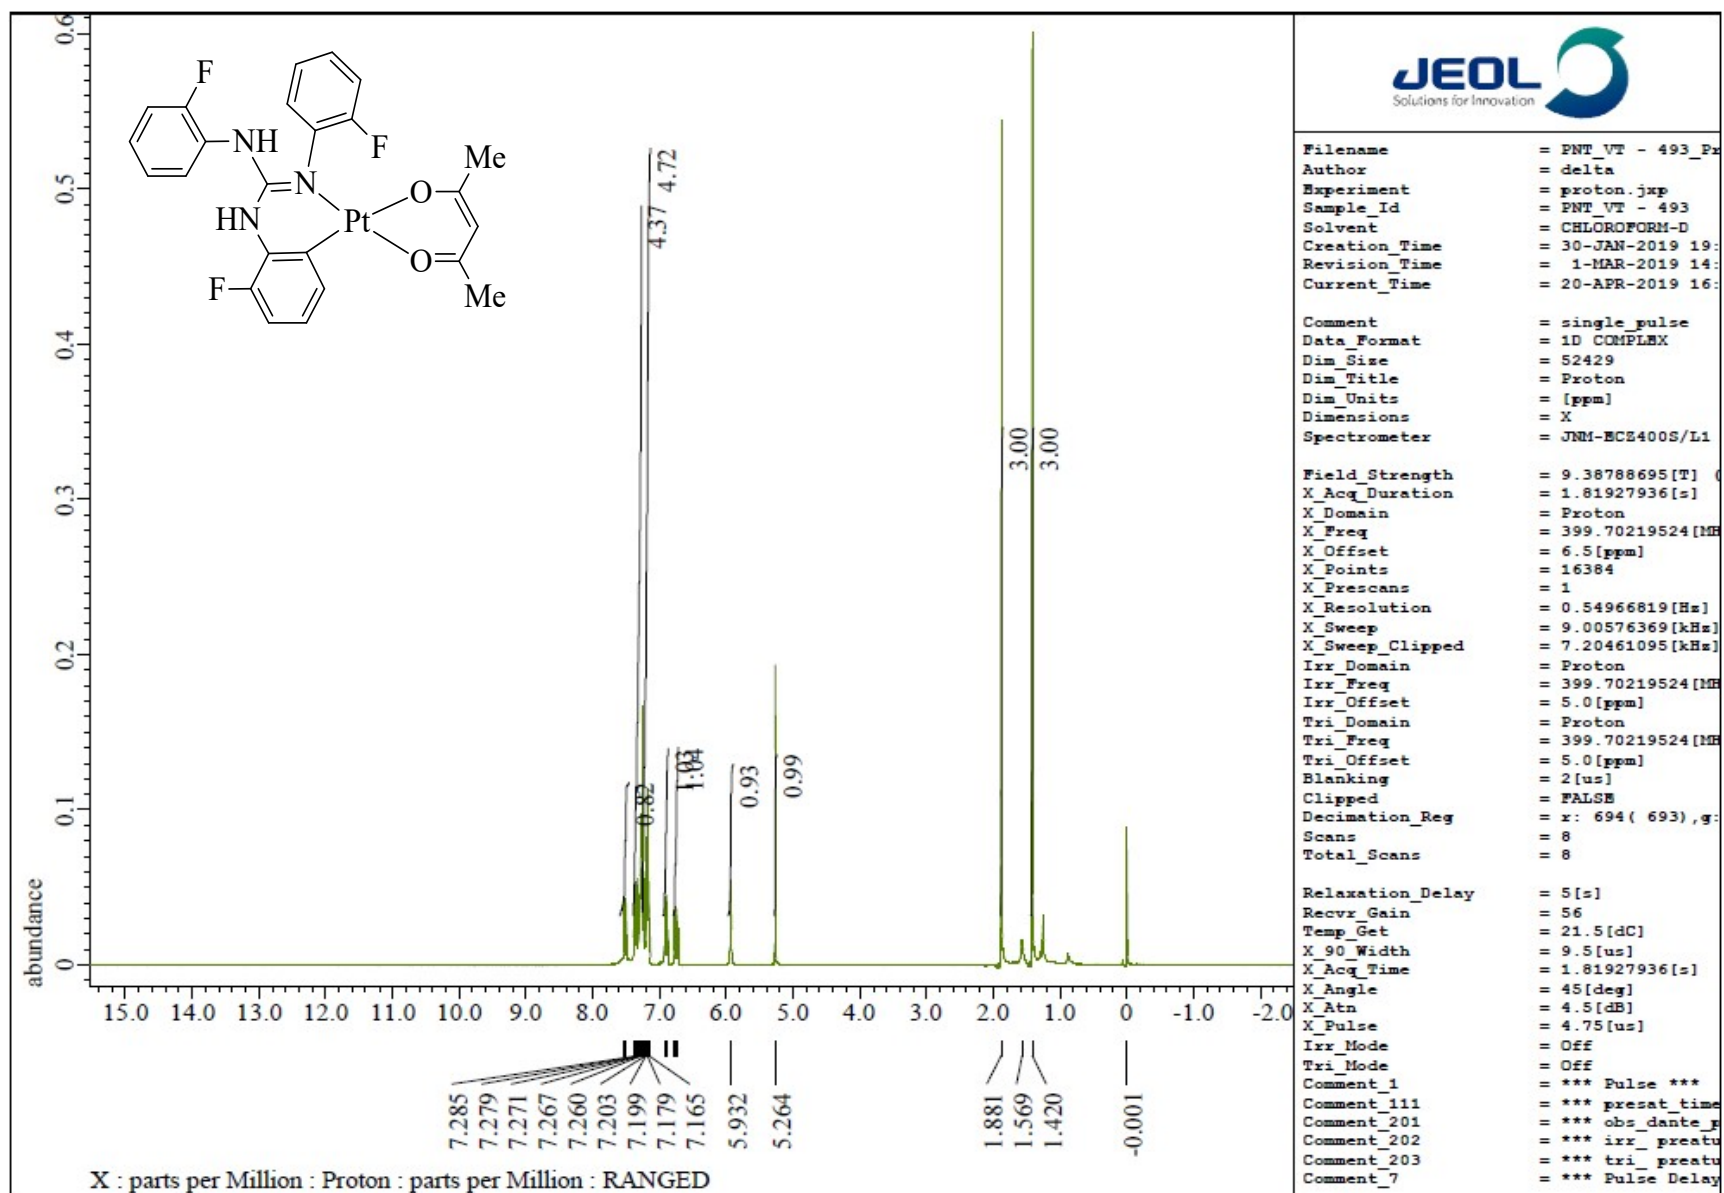

Fig. S127 <sup>1</sup>H NMR (CDCl<sub>3</sub>, 400 MHz) spectrum of 15.

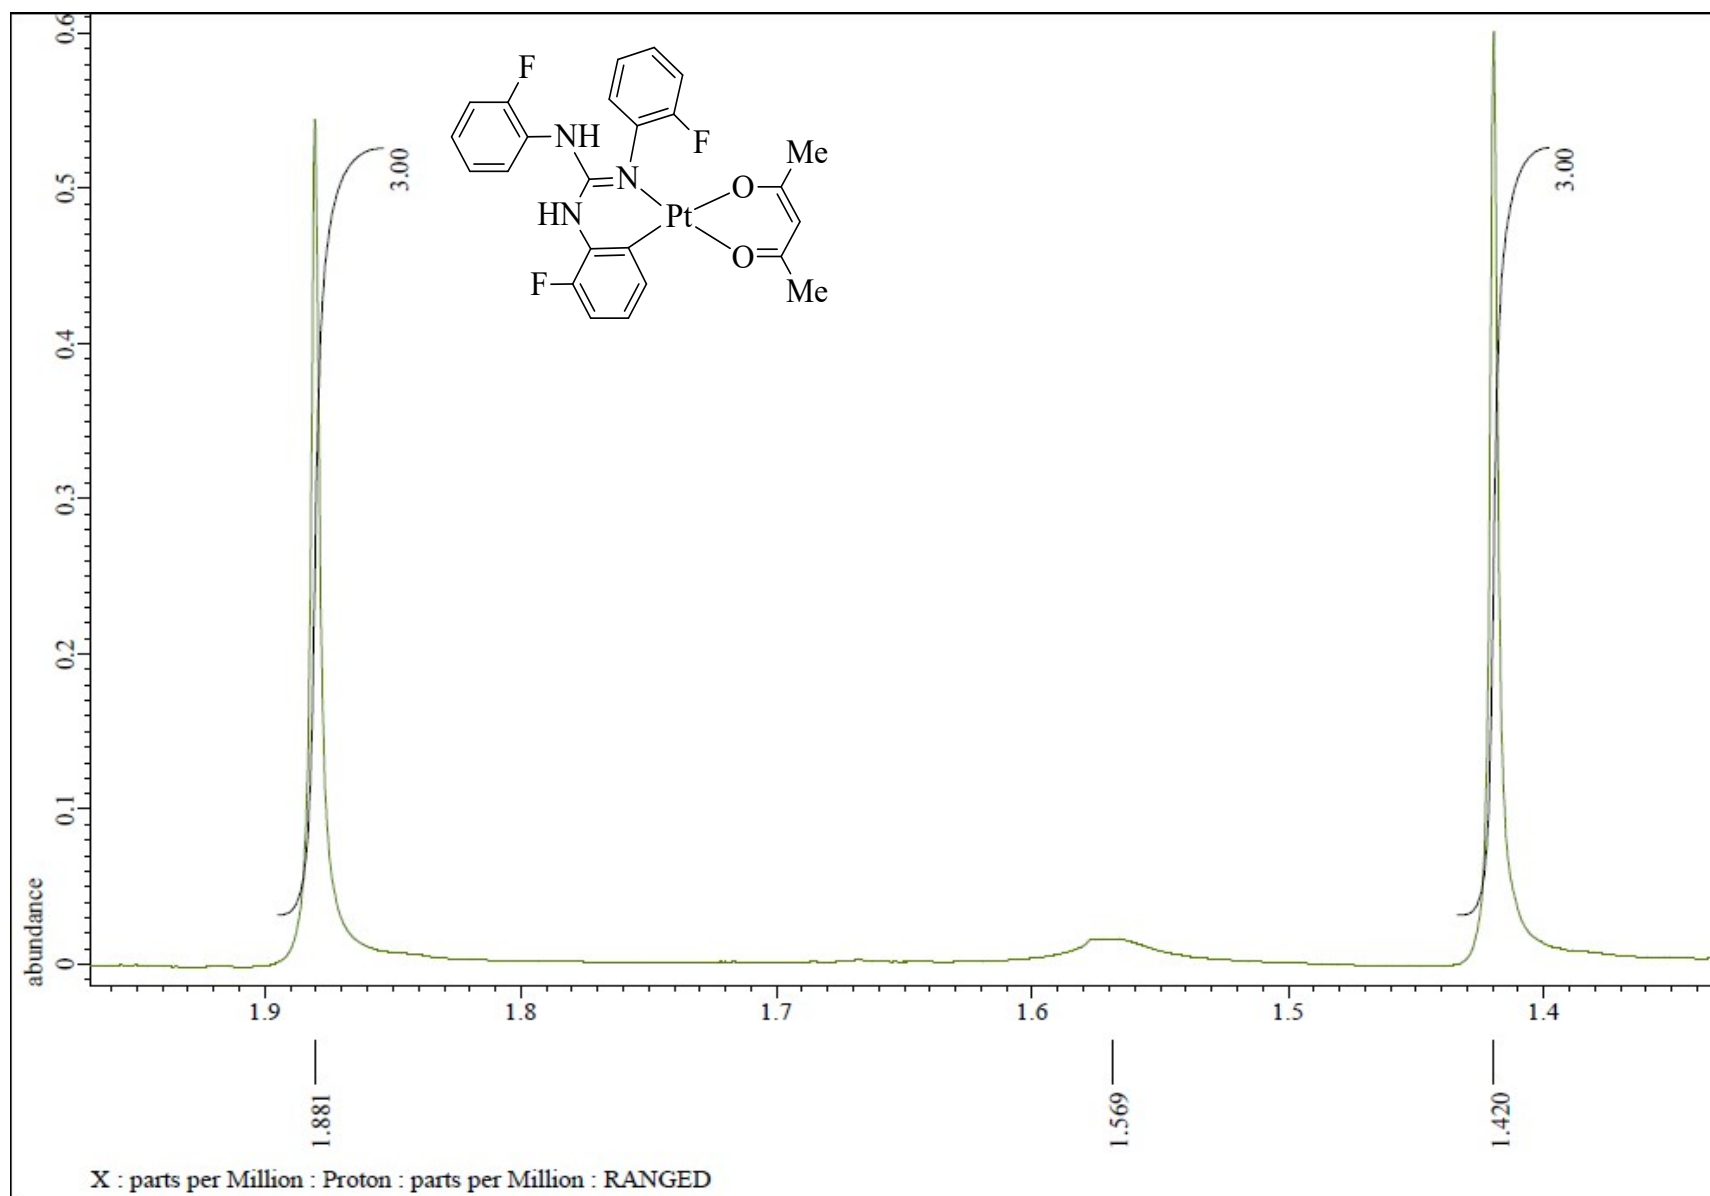

Fig. S128  $^1\text{H}$  NMR ( $\text{CDCl}_3$ , 400 MHz) spectrum of **15** in the indicated region.

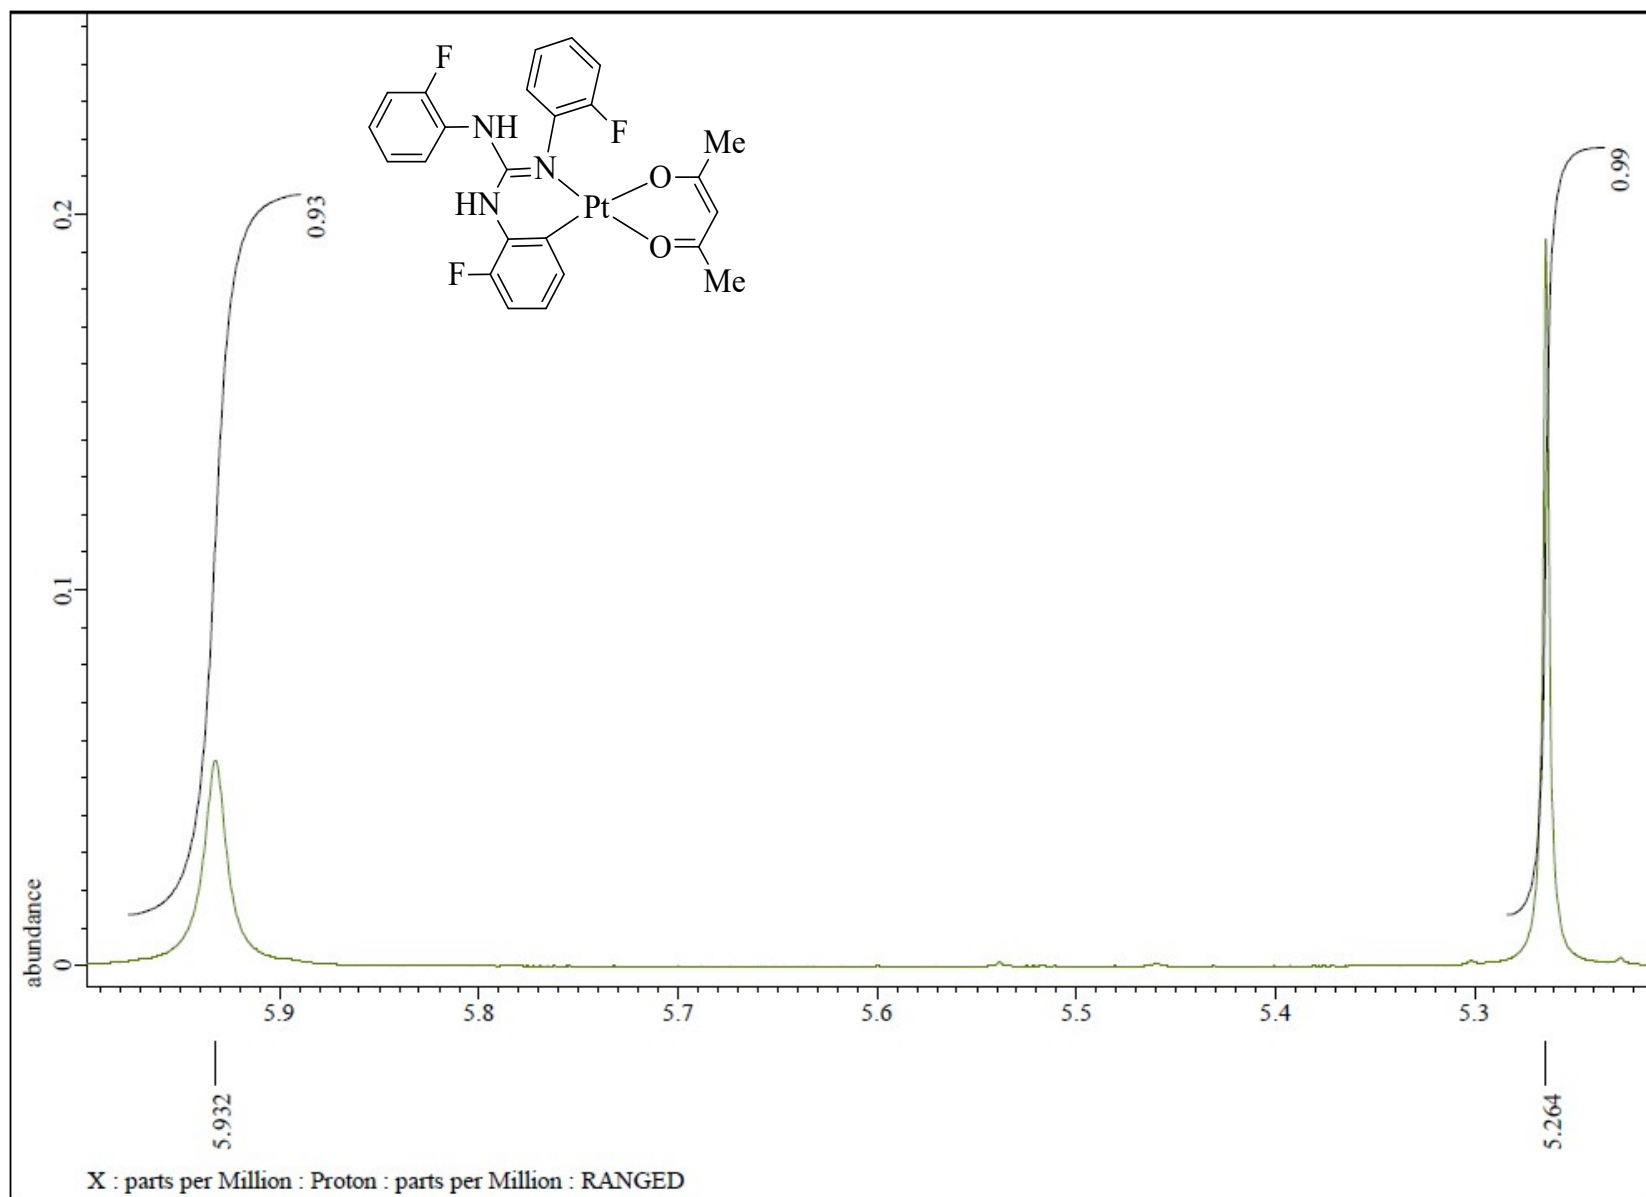

Fig. S129  $^1\text{H}$  NMR ( $\text{CDCl}_3$ , 400 MHz) spectrum of **15** in the indicated region.

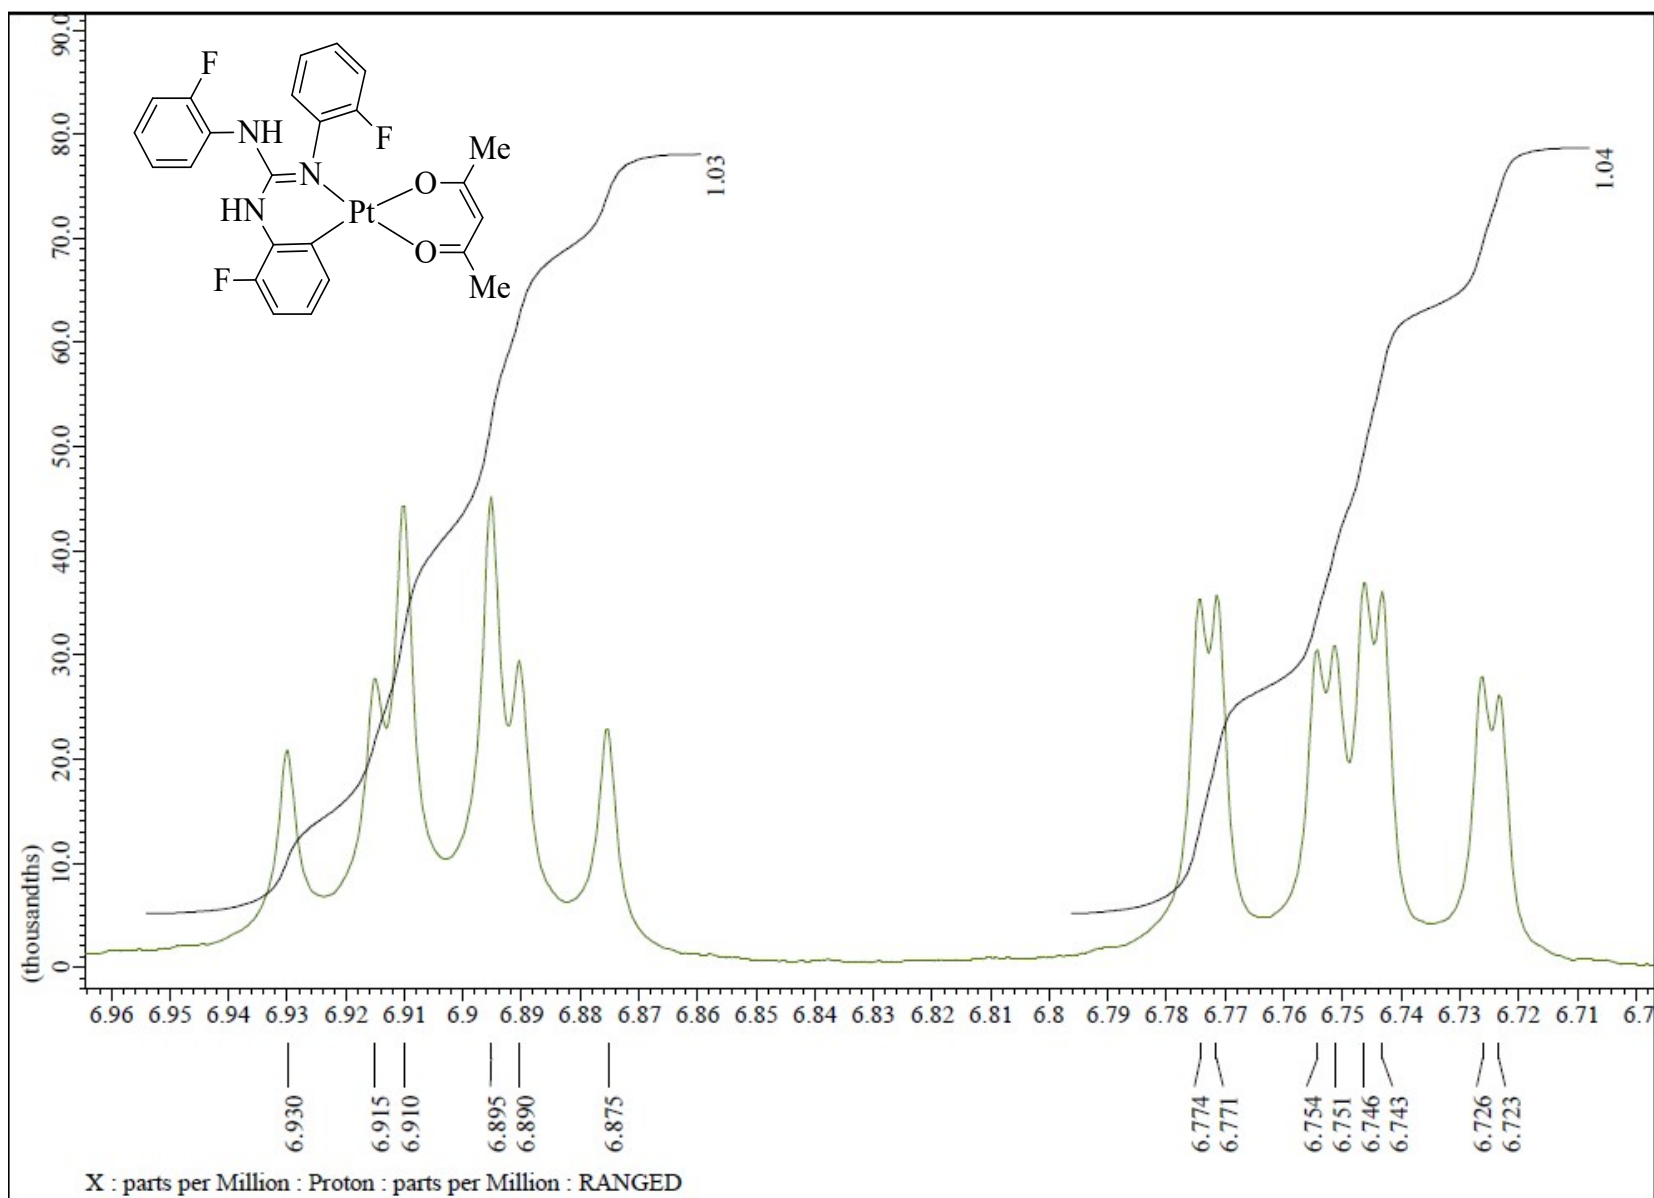

Fig. S130  $^1\text{H NMR}$  (CDCl<sub>3</sub>, 400 MHz) spectrum of **15** in the indicated region.

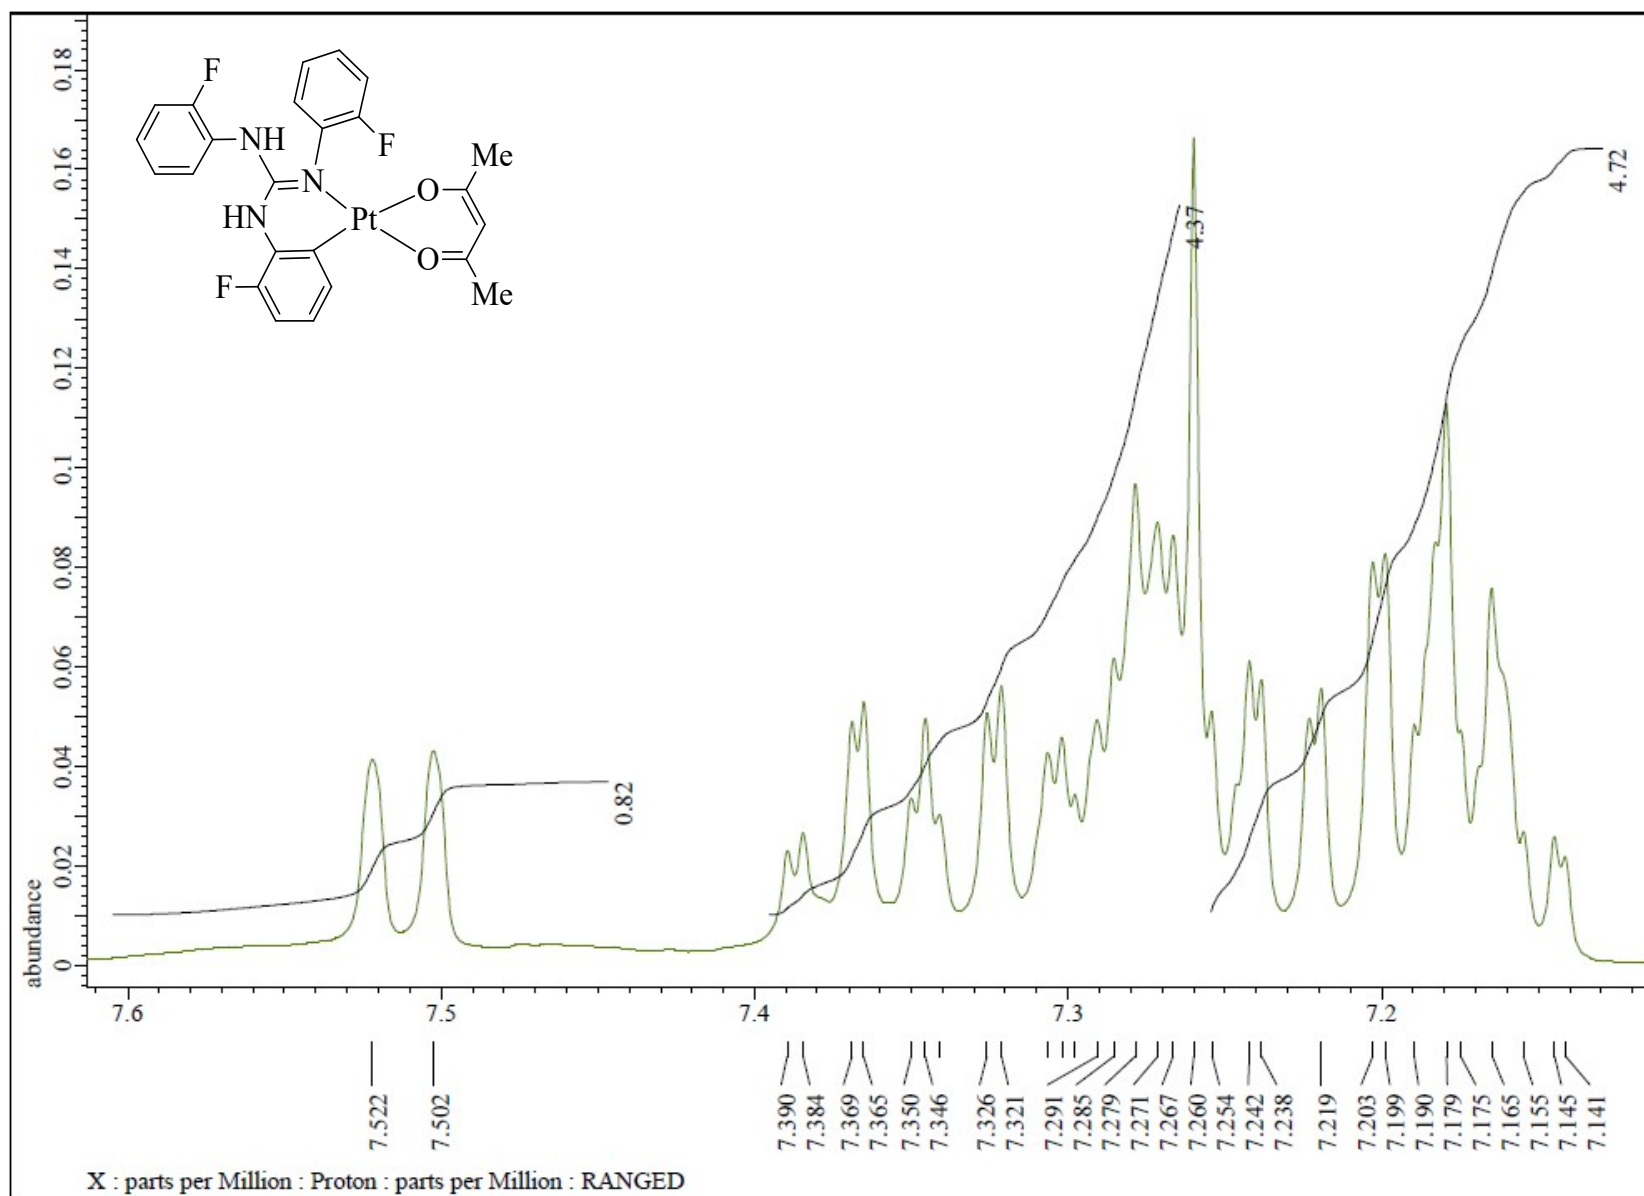

Fig. S131  $^1\text{H}$  NMR ( $\text{CDCl}_3$ , 400 MHz) spectrum of **15** in the indicated region.

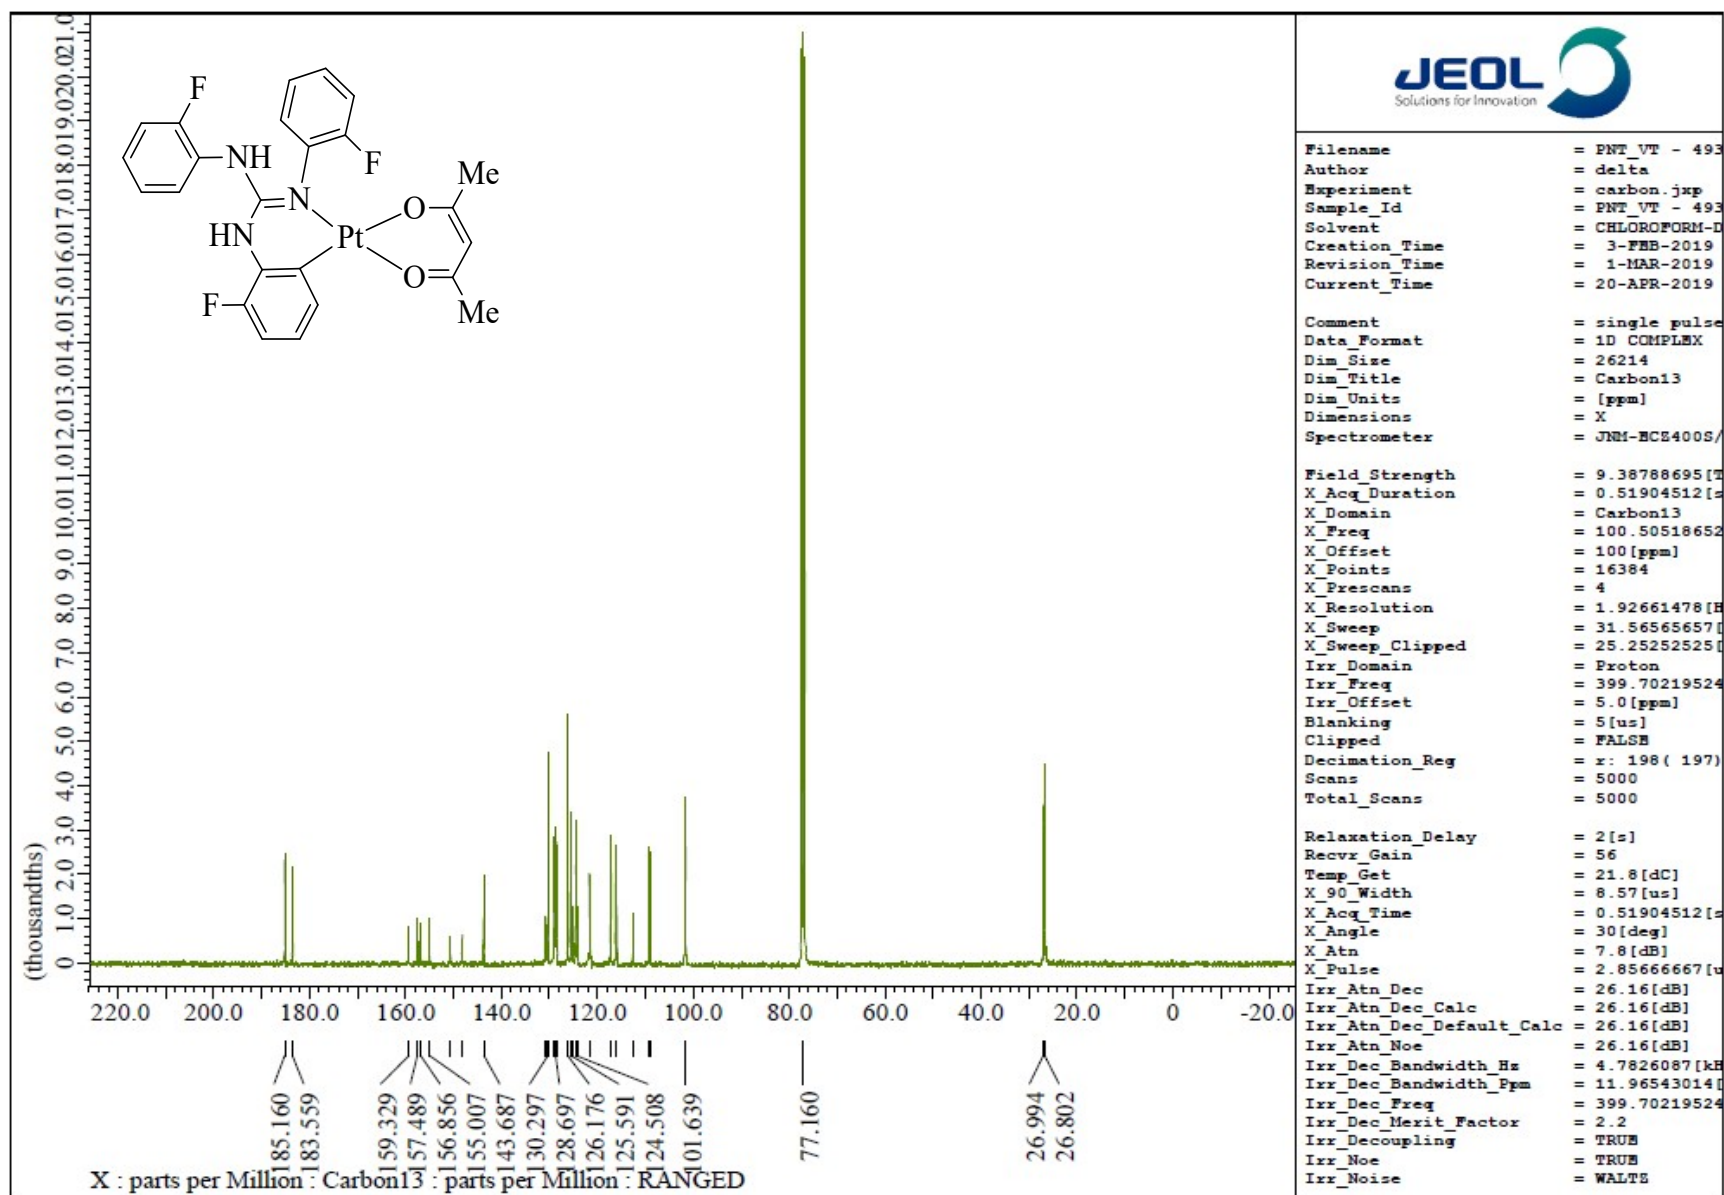

Fig. S132 <sup>13</sup>C {<sup>1</sup>H} NMR (CDCl<sub>3</sub>, 100.5 MHz) spectrum of 15.

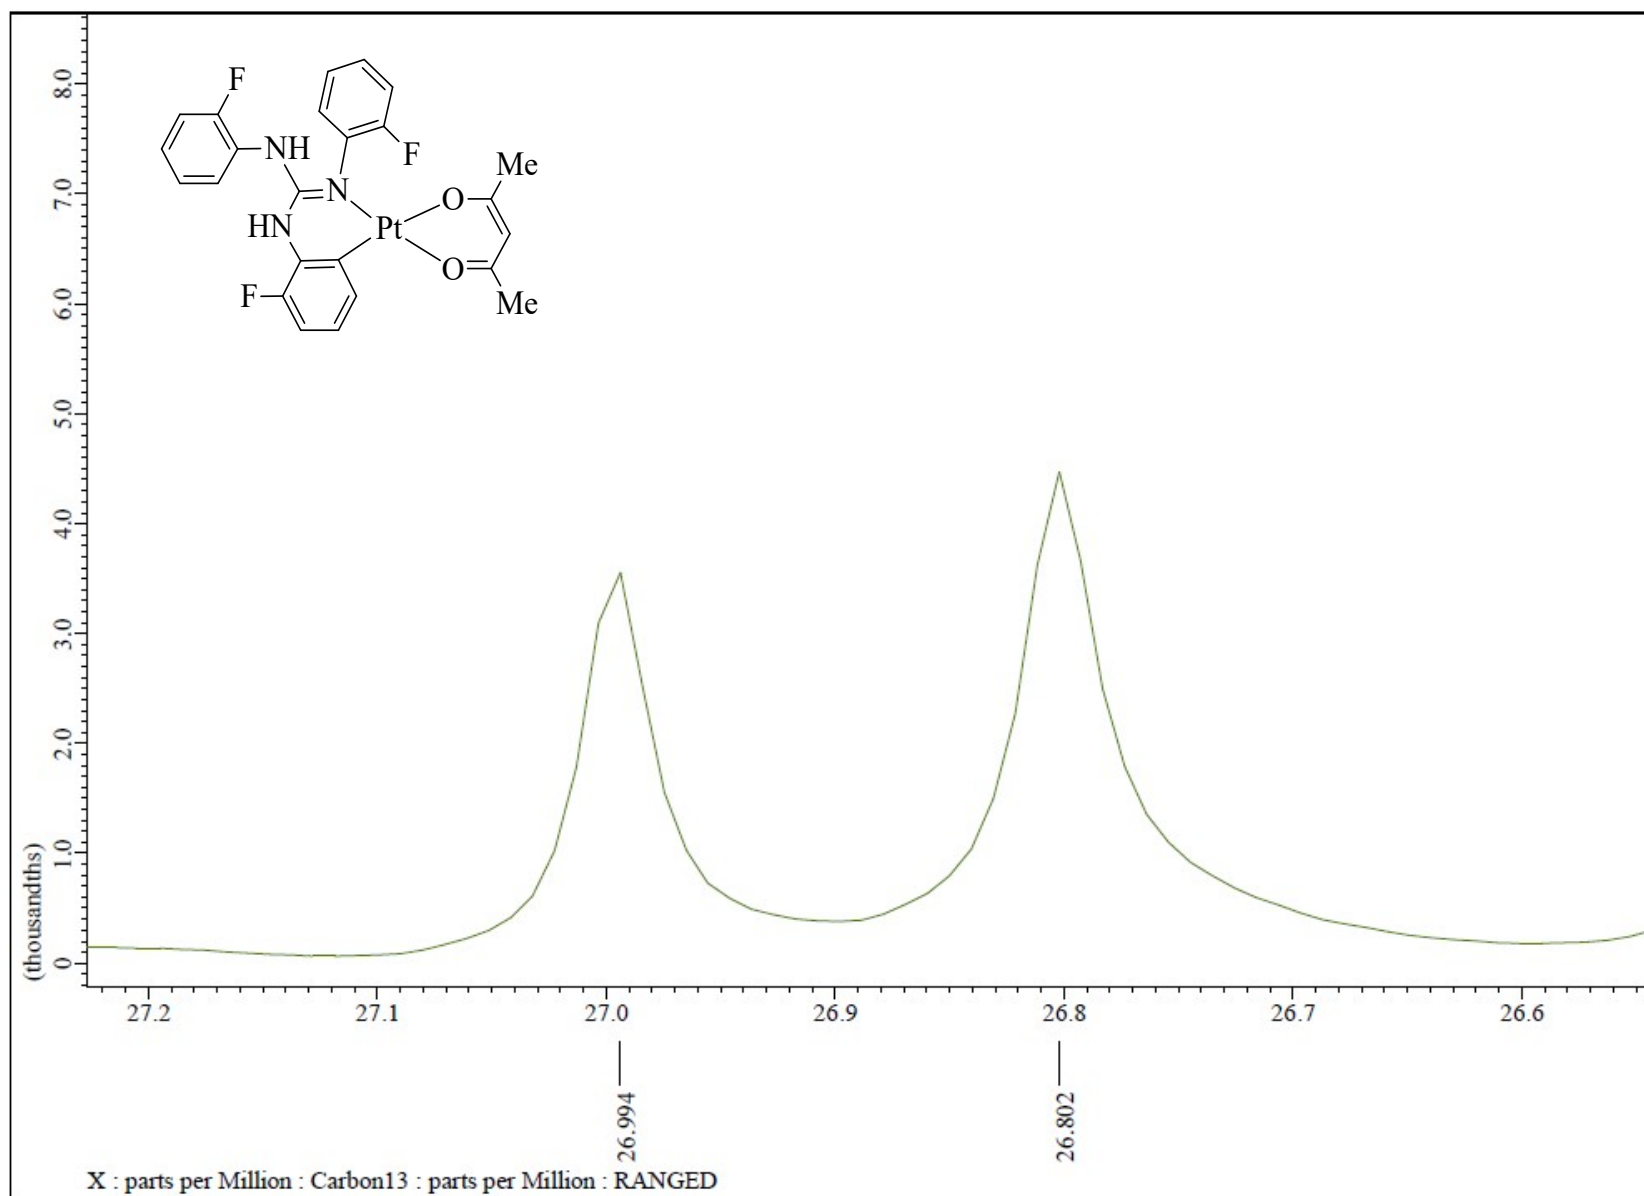

Fig. S133  $^{13}\text{C}\{^1\text{H}\}$  NMR ( $\text{CDCl}_3$ , 100.5 MHz) spectrum of **15** in the indicated region.

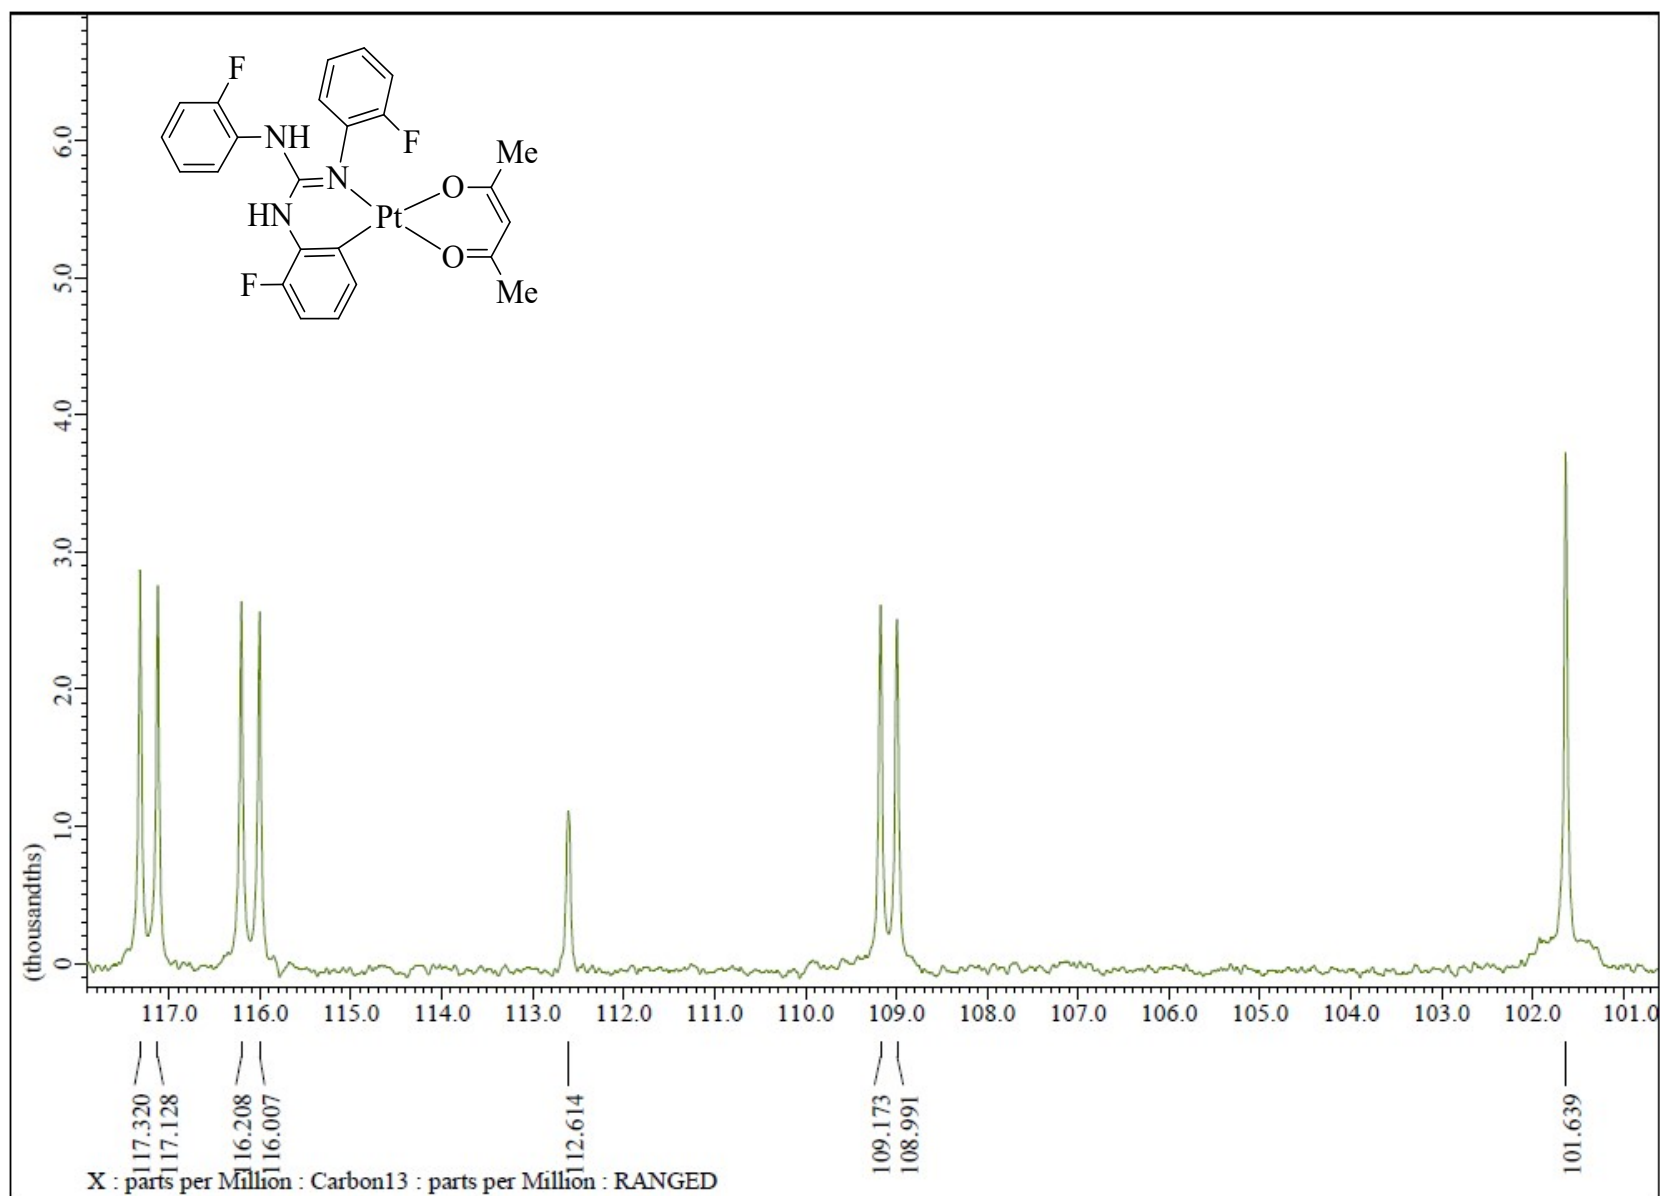

Fig. S134  $^{13}\text{C}\{^1\text{H}\}$  NMR (CDCl<sub>3</sub>, 100.5 MHz) spectrum of **15** in the indicated region.



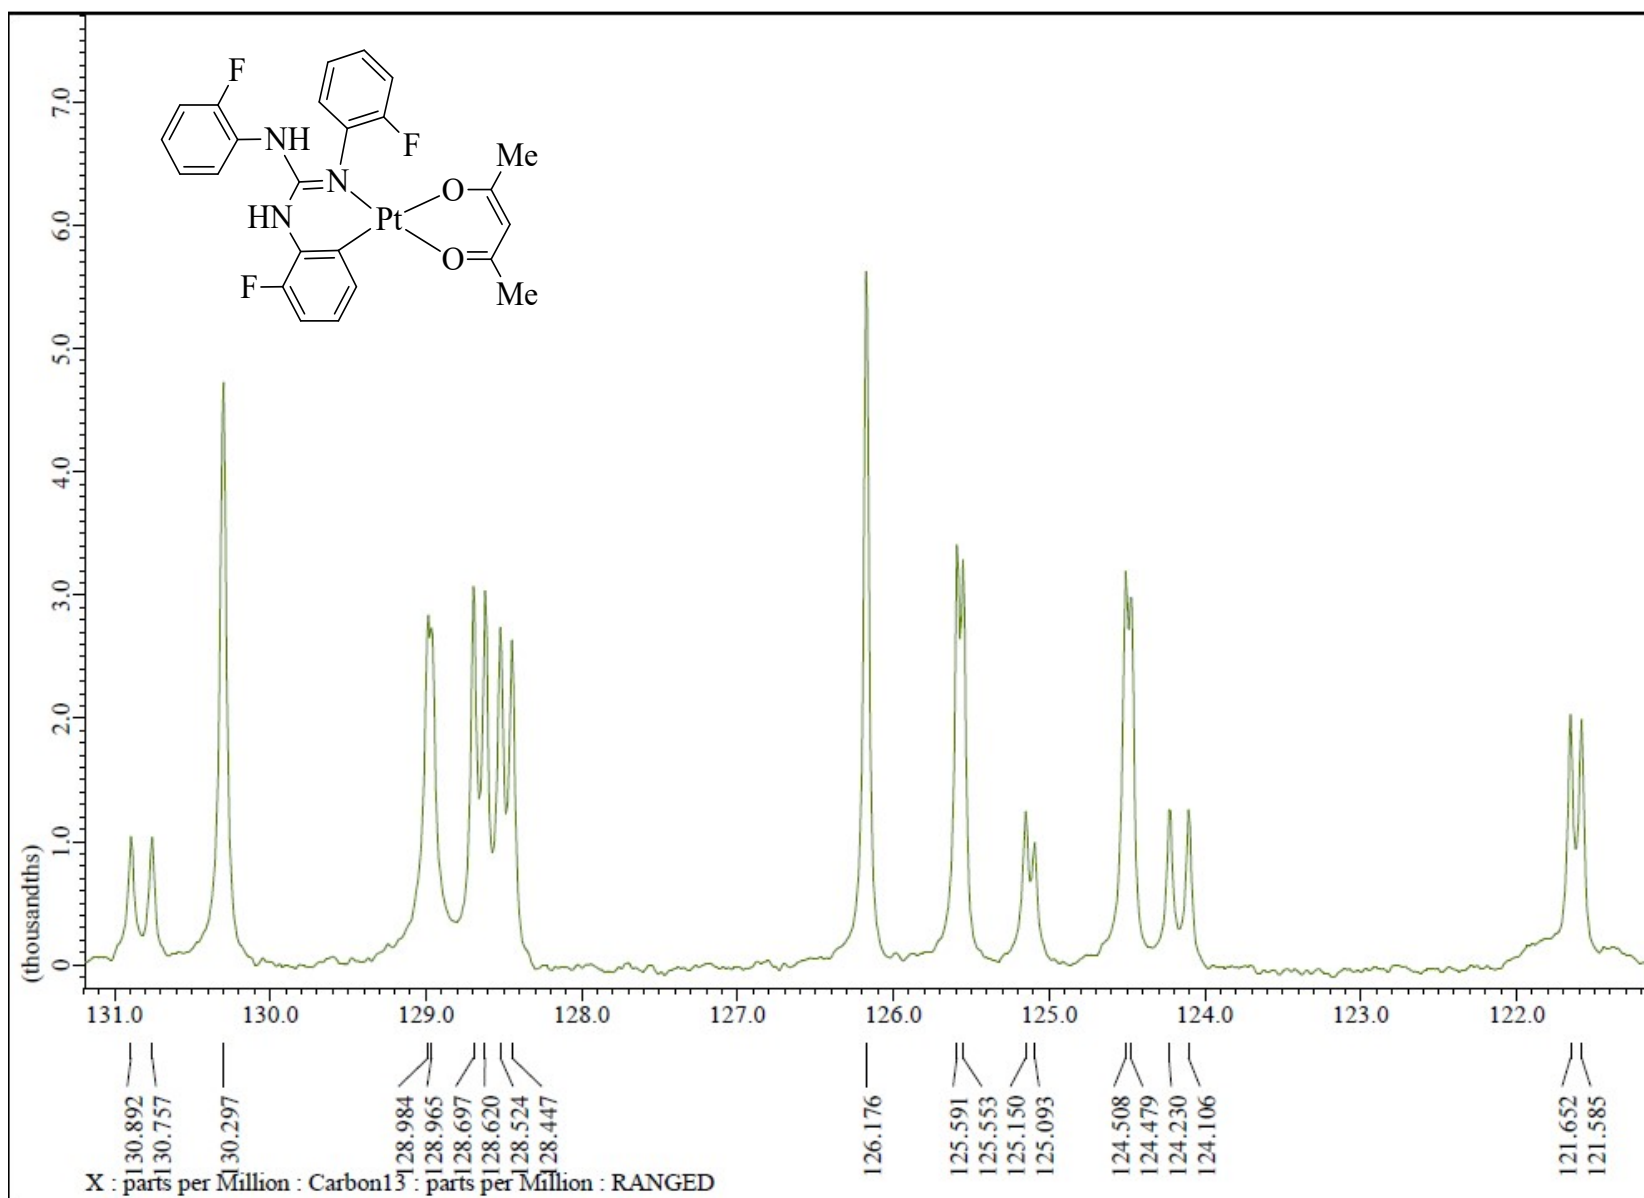

Fig. S135  $^{13}\text{C}\{^1\text{H}\}$  NMR ( $\text{CDCl}_3$ , 100.5 MHz) spectrum of **15** in the indicated region.

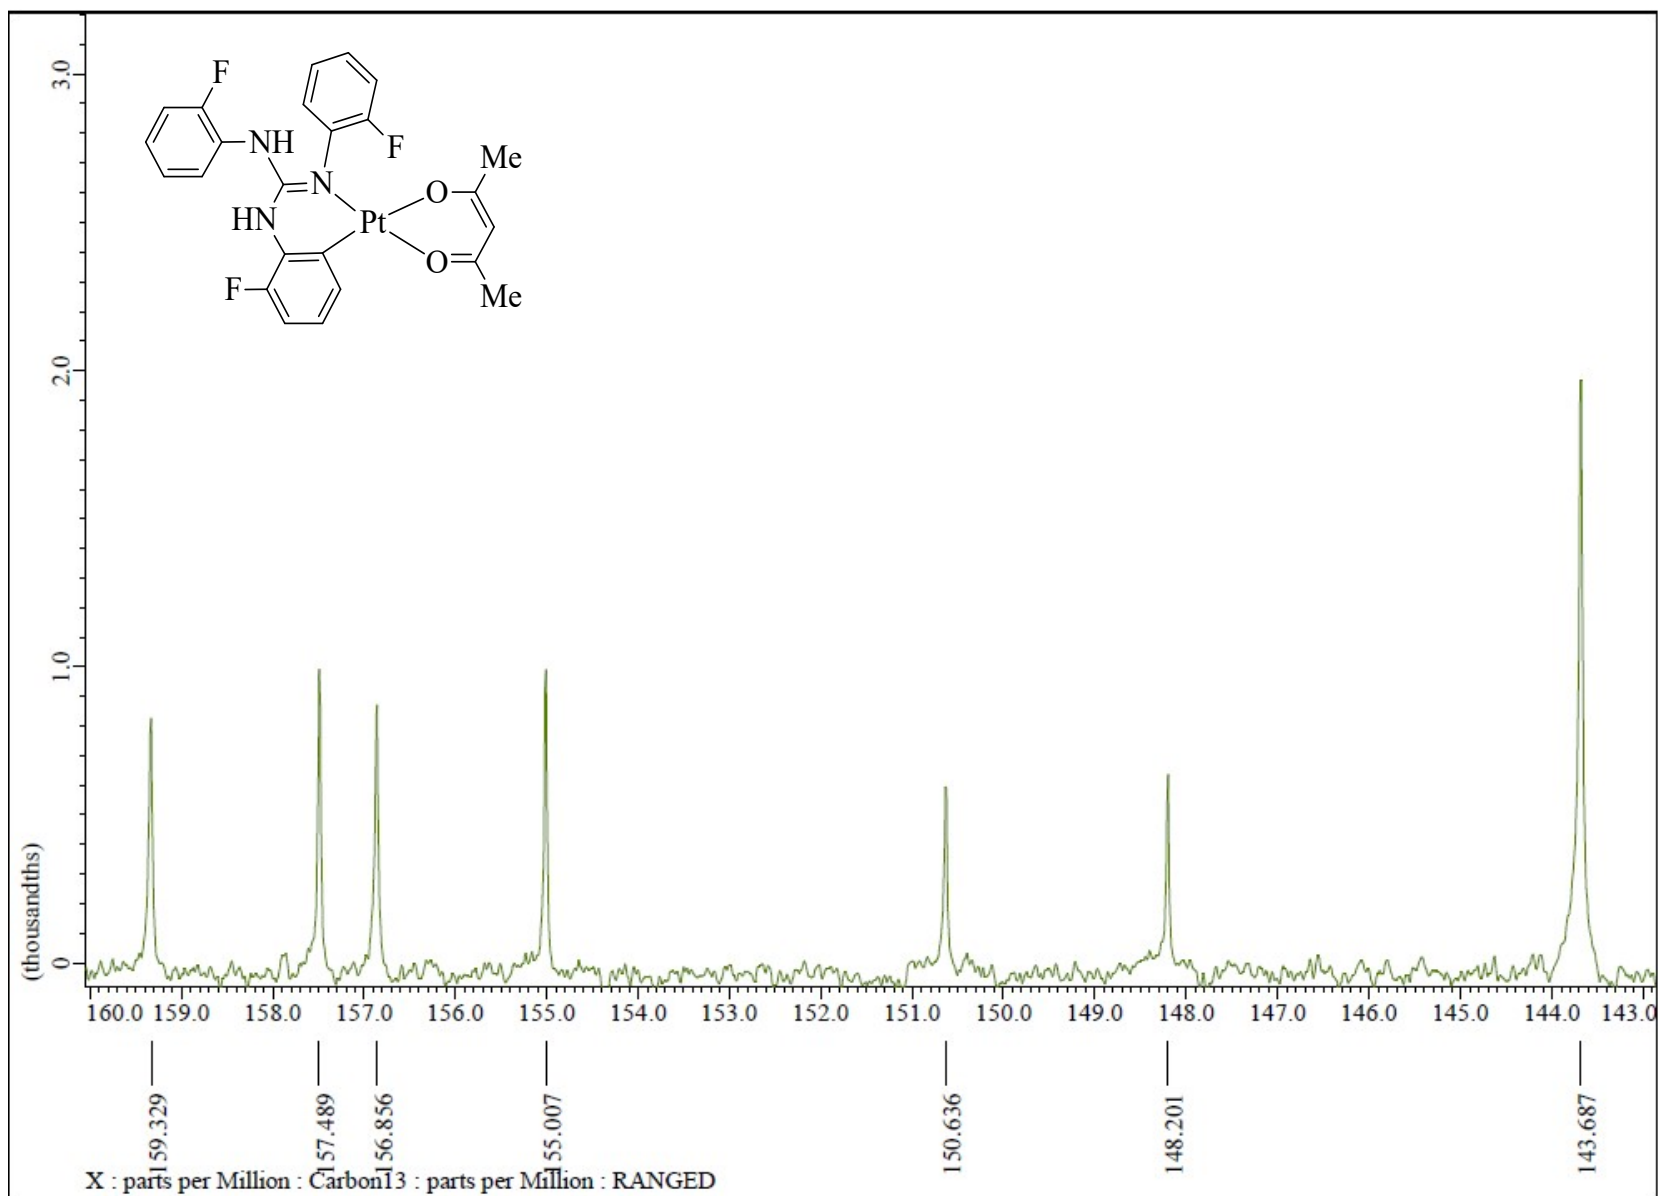

Fig. S136  $^{13}\text{C}\{^1\text{H}\}$  NMR (CDCl<sub>3</sub>, 100.5 MHz) spectrum of **15** in the indicated region.

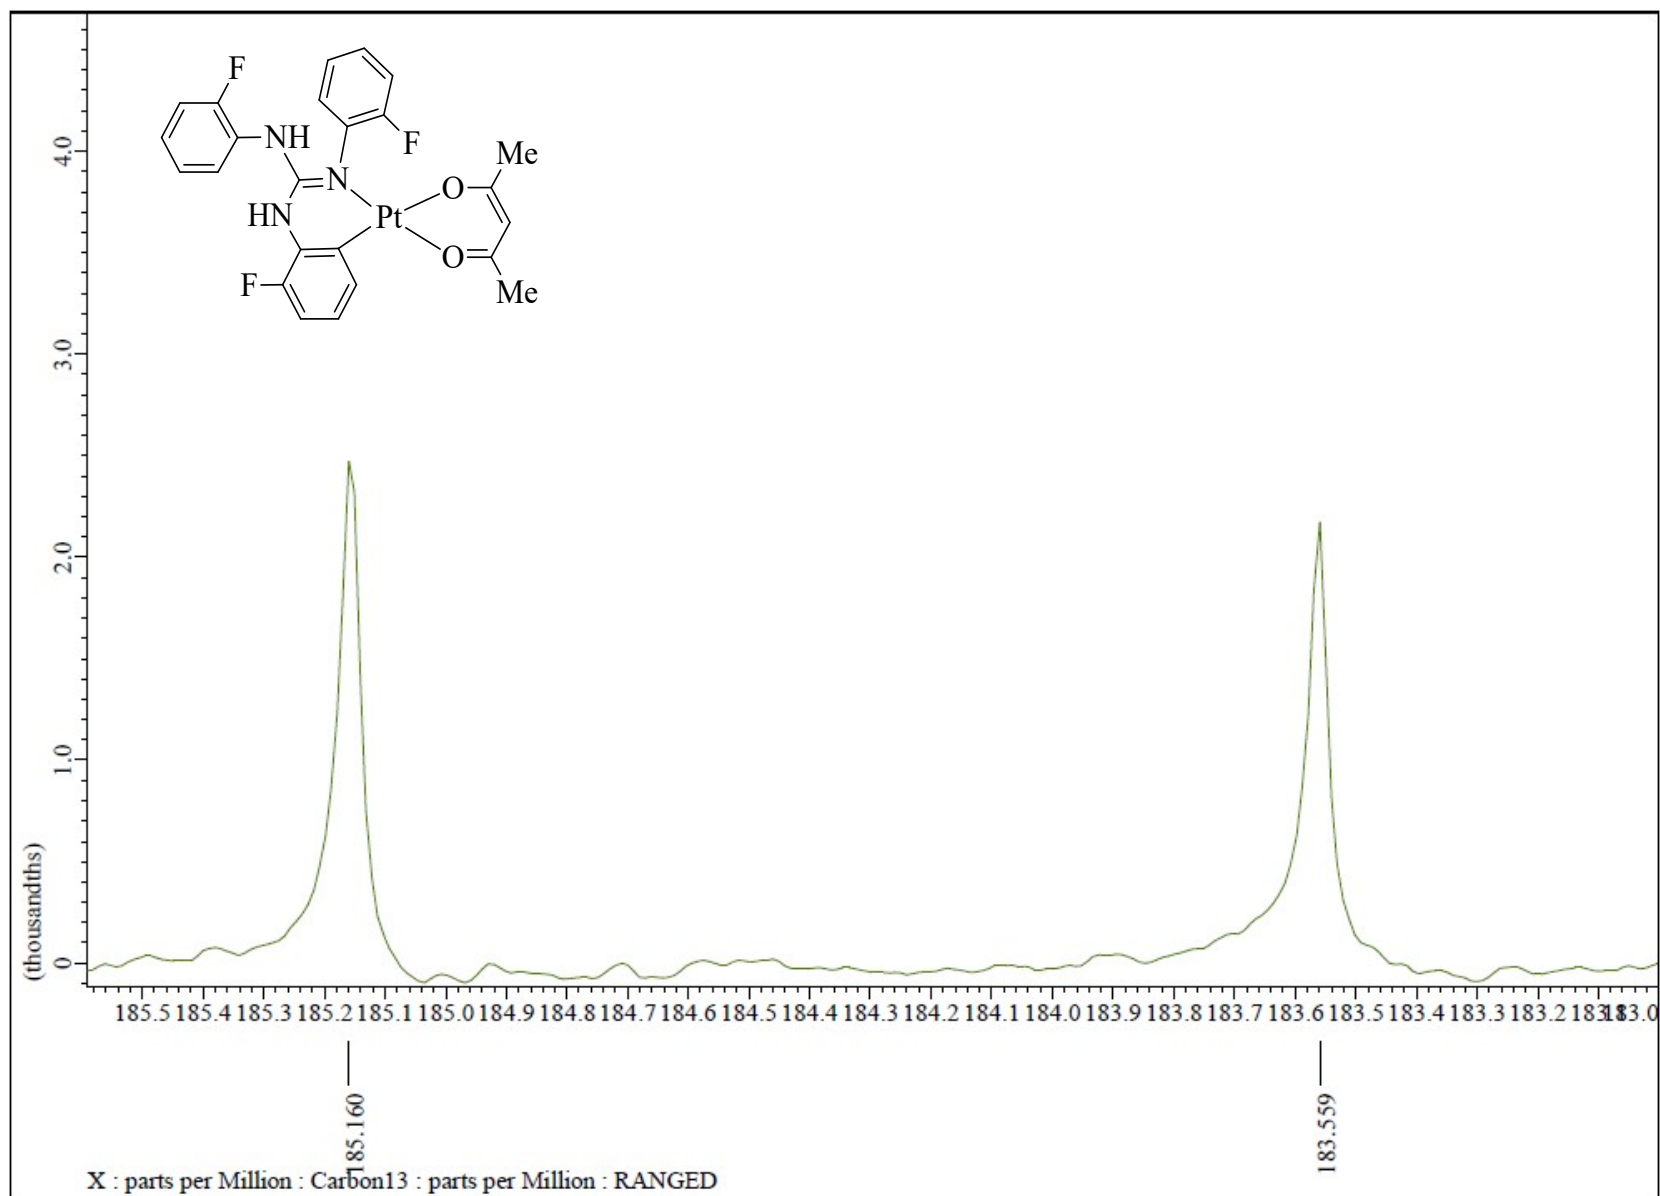

Fig. S137  $^{13}\text{C}\{^1\text{H}\}$  NMR ( $\text{CDCl}_3$ , 100.5 MHz) spectrum of **15** in the indicated region.

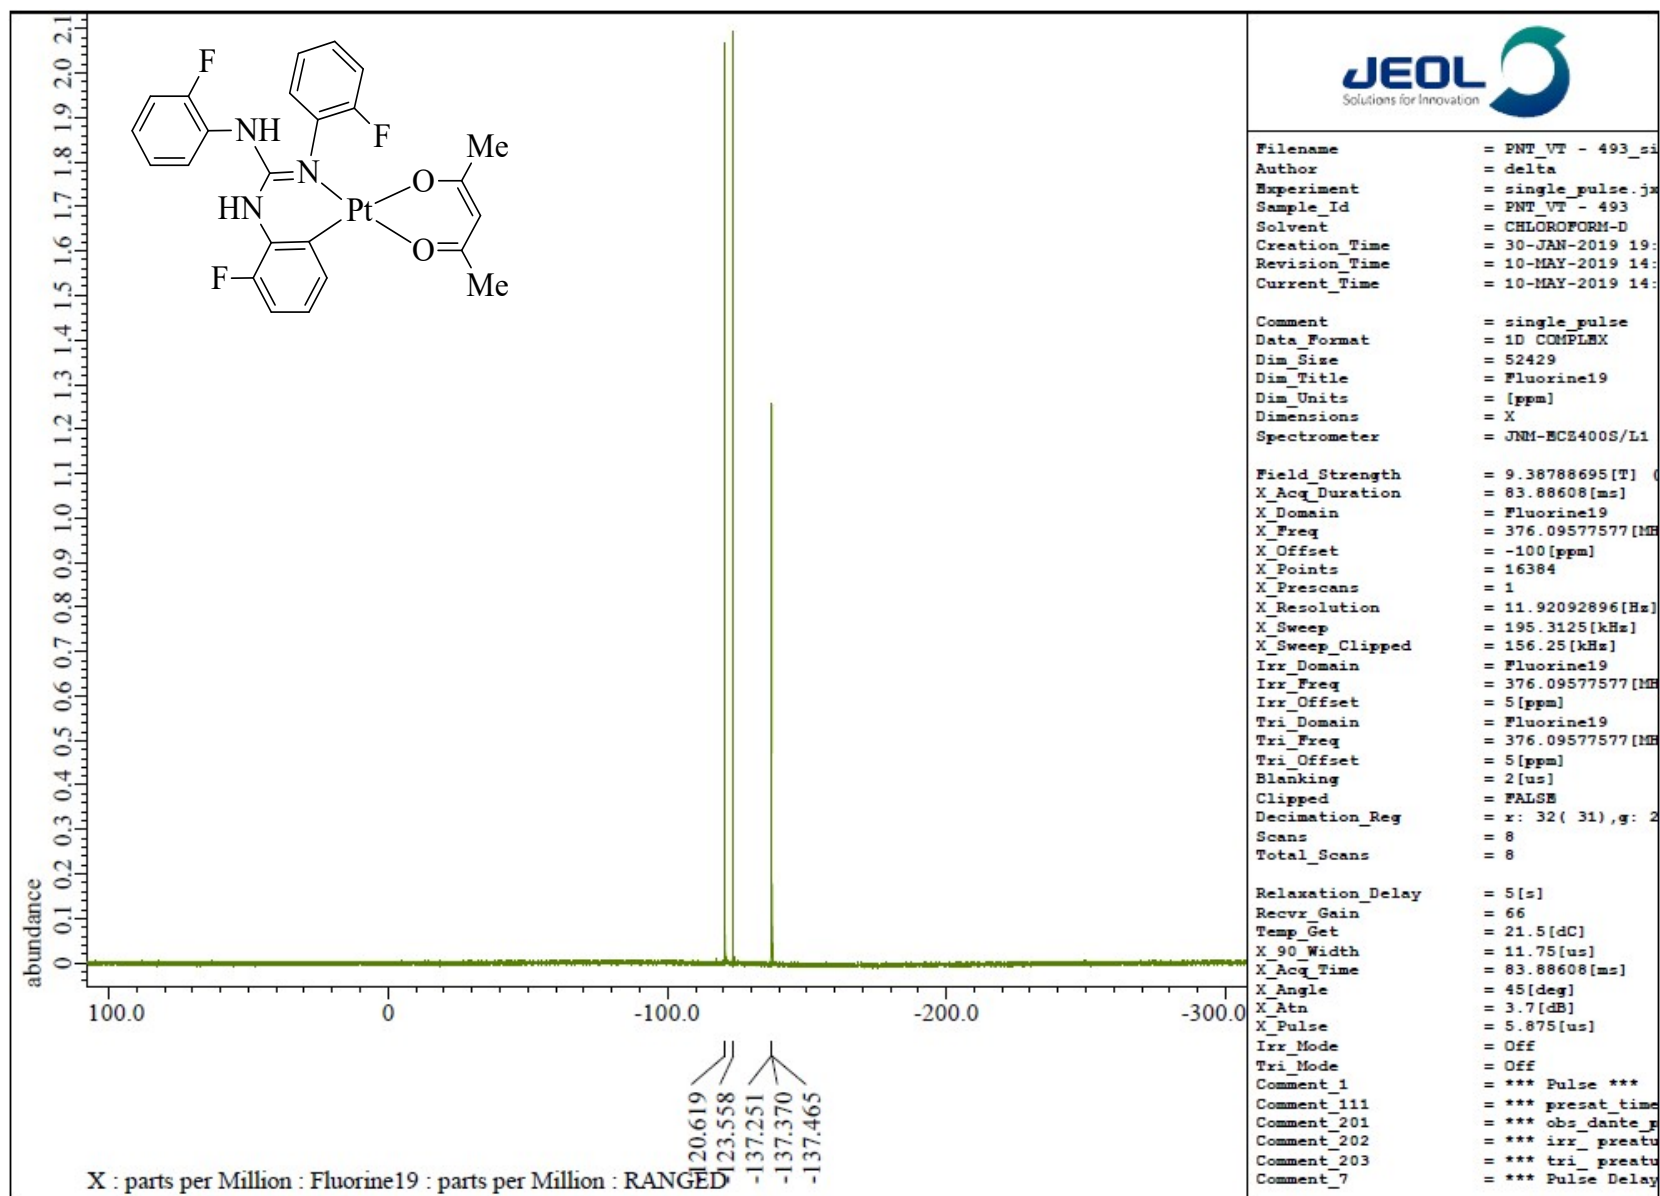

Fig. S138  $^{19}\text{F}\{^1\text{H}\}$  NMR ( $\text{CDCl}_3$ , 376.31 MHz) spectrum of 15.

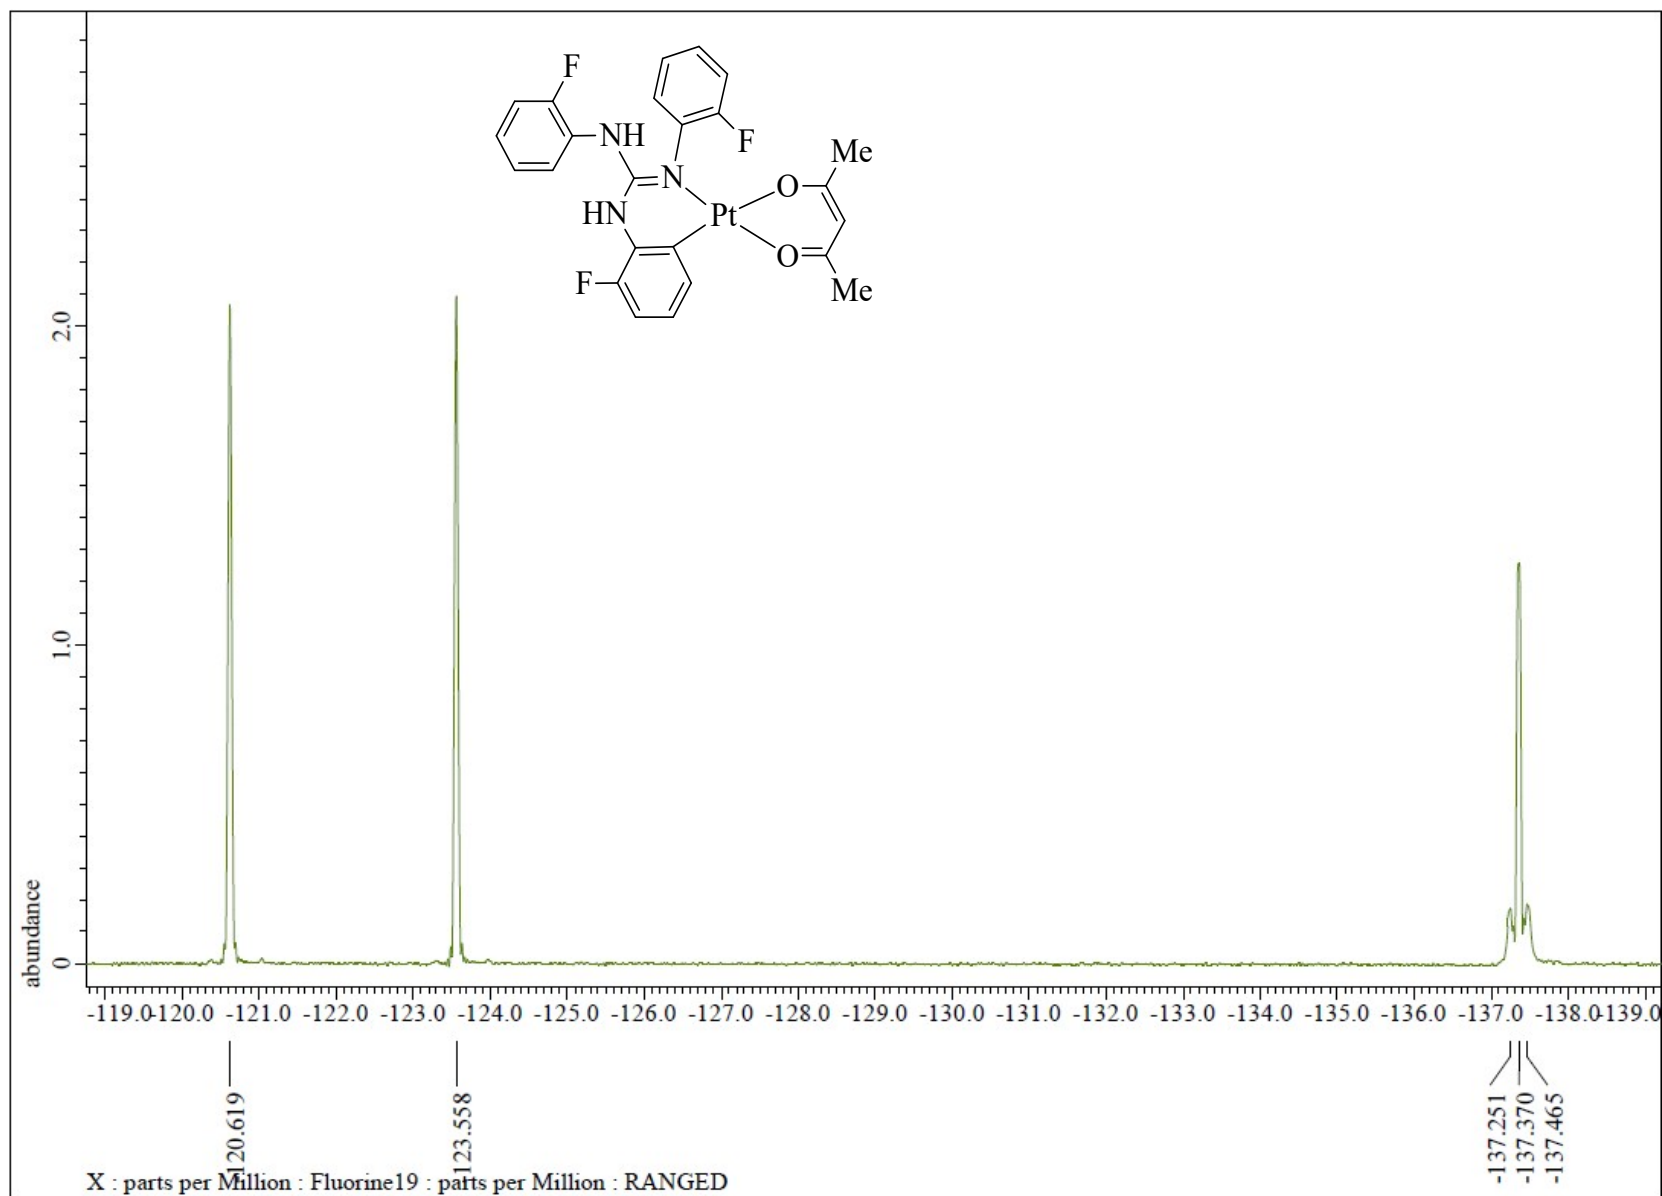

Fig. S139  $^{19}\text{F}$   $\{^1\text{H}\}$  NMR ( $\text{CDCl}_3$ , 376.31 MHz) spectrum of **15** in the indicated region.

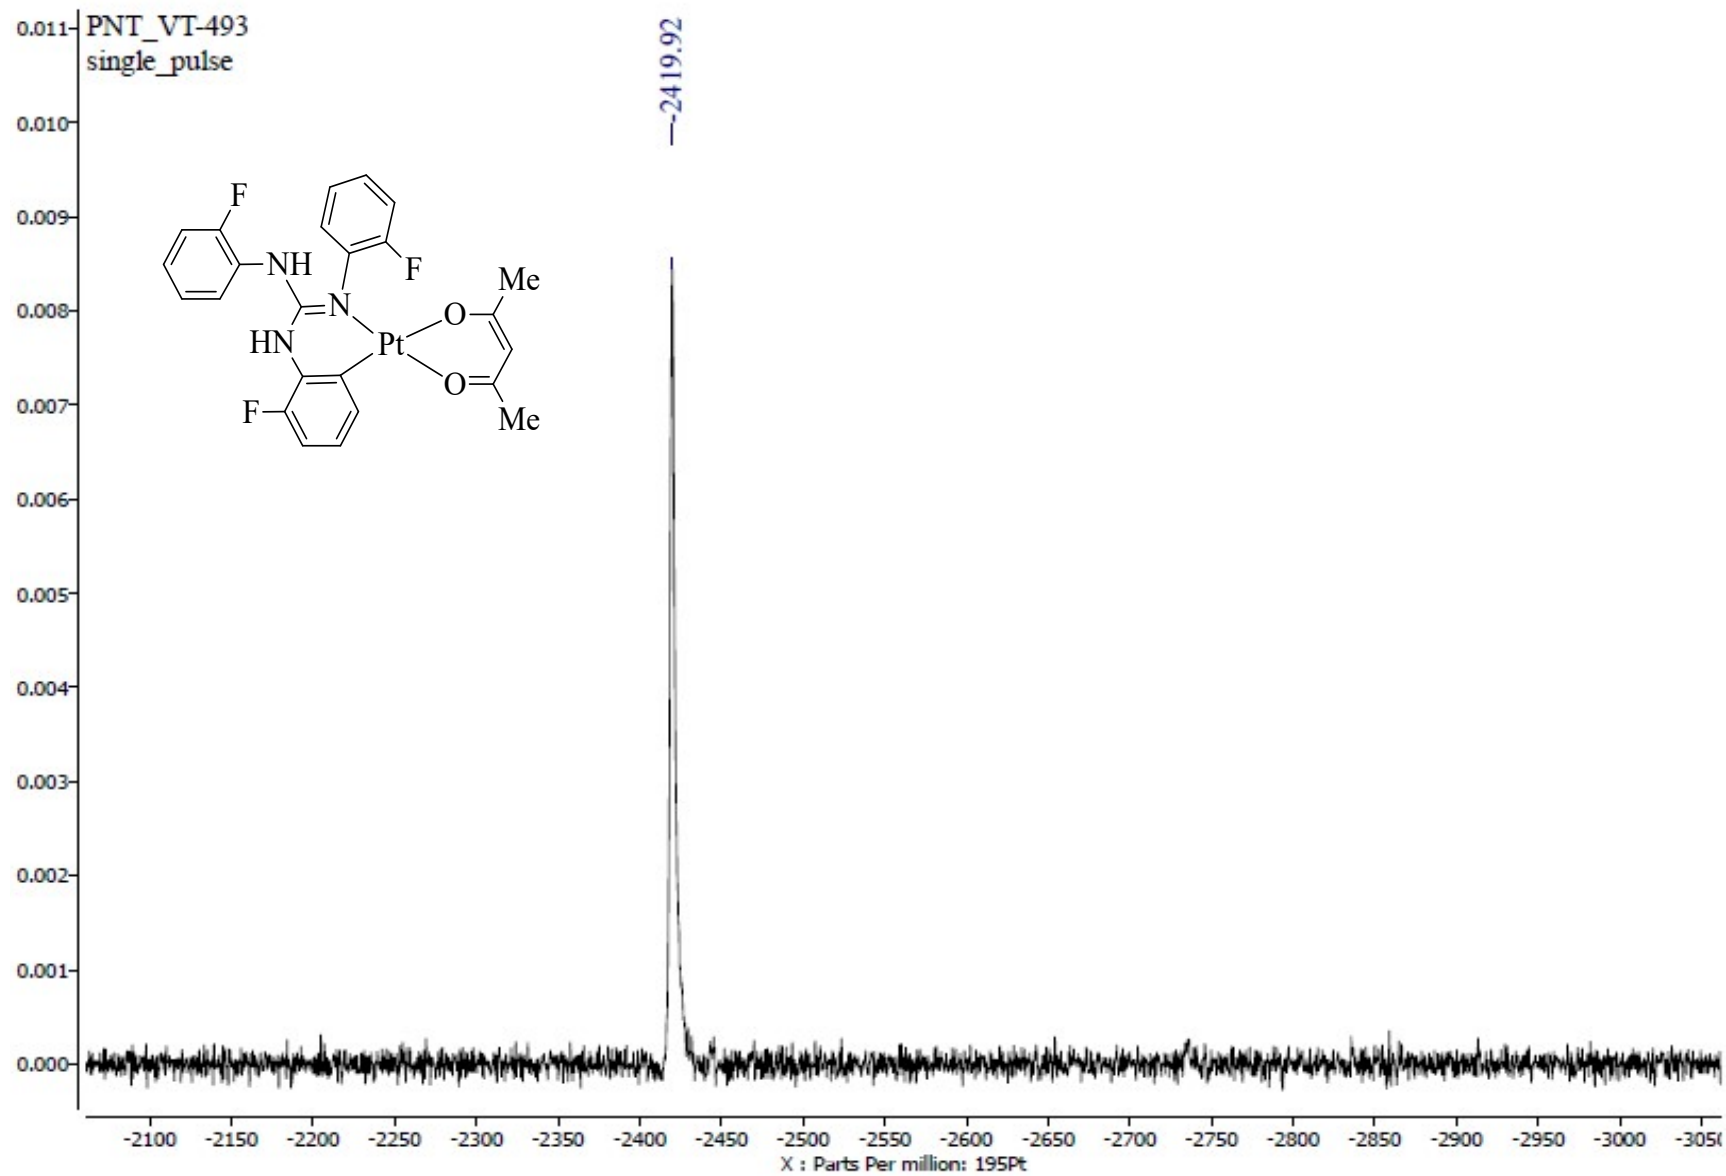

Fig. S140  $^{195}\text{Pt}\{^1\text{H}\}$  NMR ( $\text{CDCl}_3$ , 85.8 MHz) spectrum of 15.

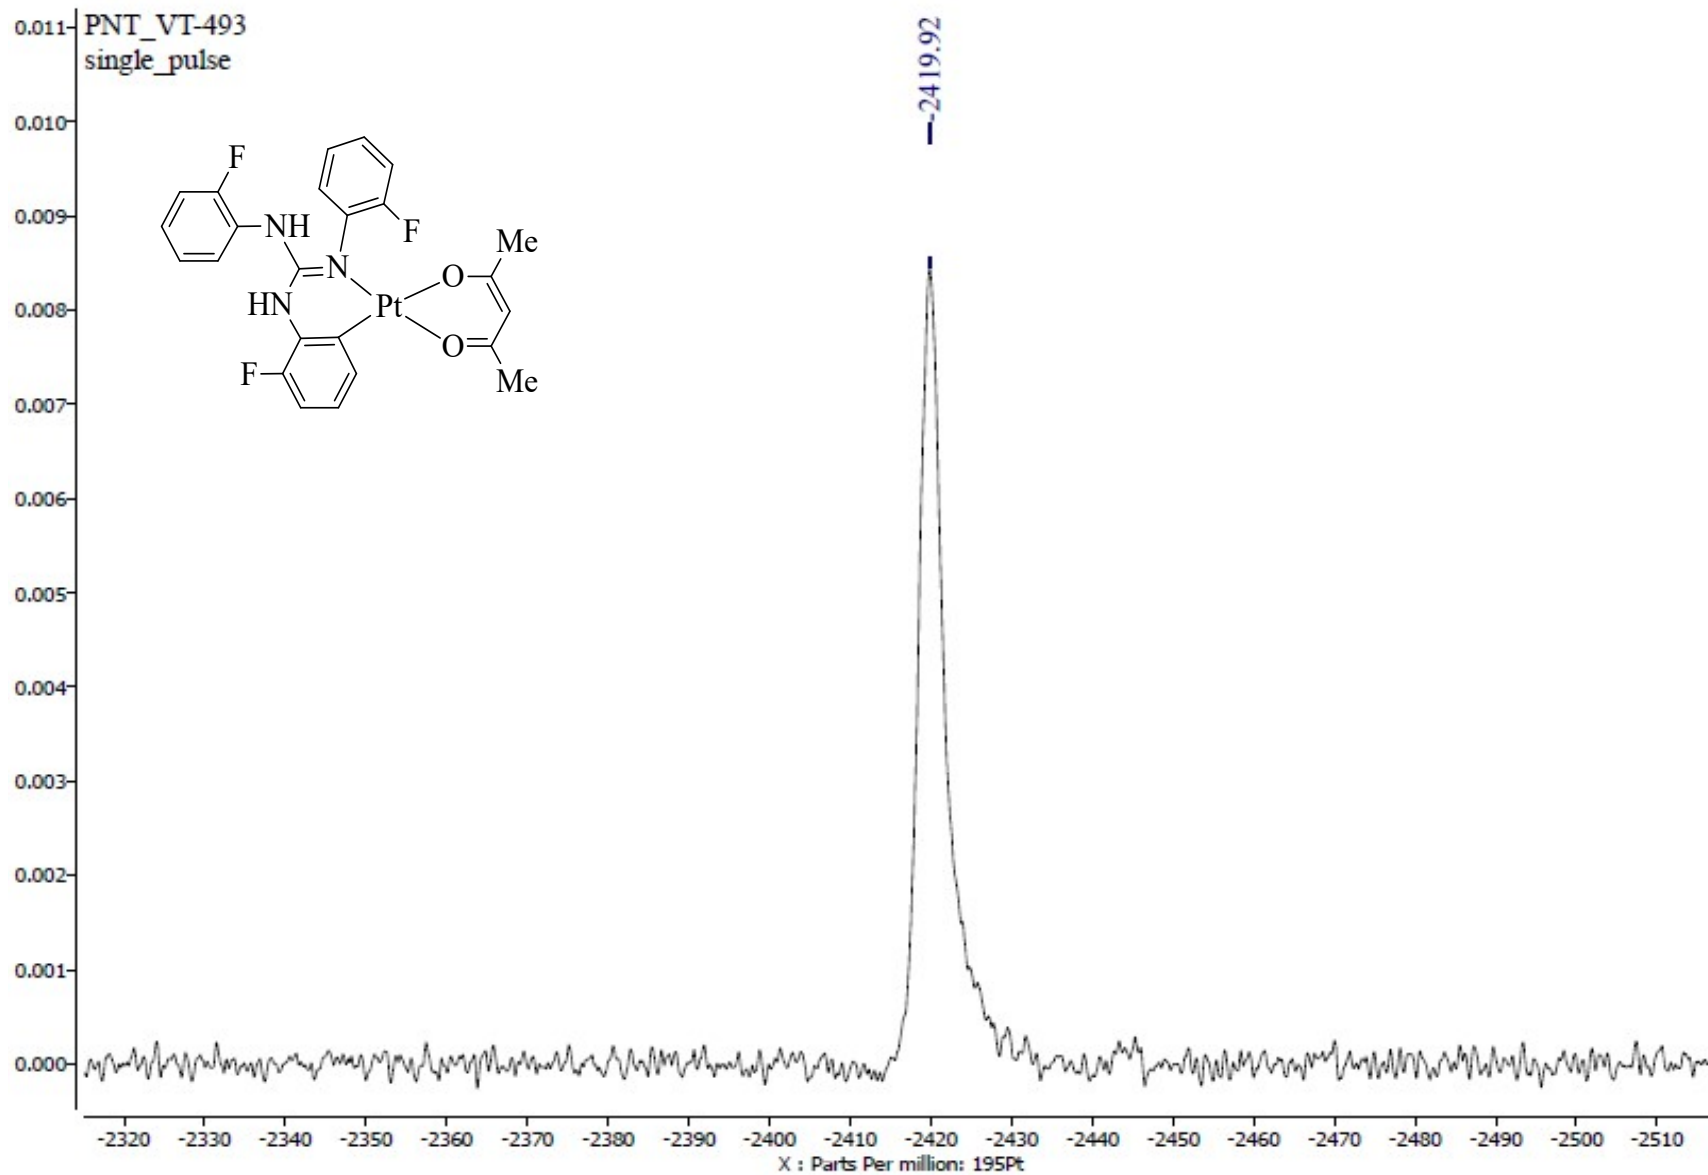

Fig. S141  $^{195}\text{Pt}\{^1\text{H}\}$  NMR ( $\text{CDCl}_3$ , 85.8 MHz) spectrum of **15**.

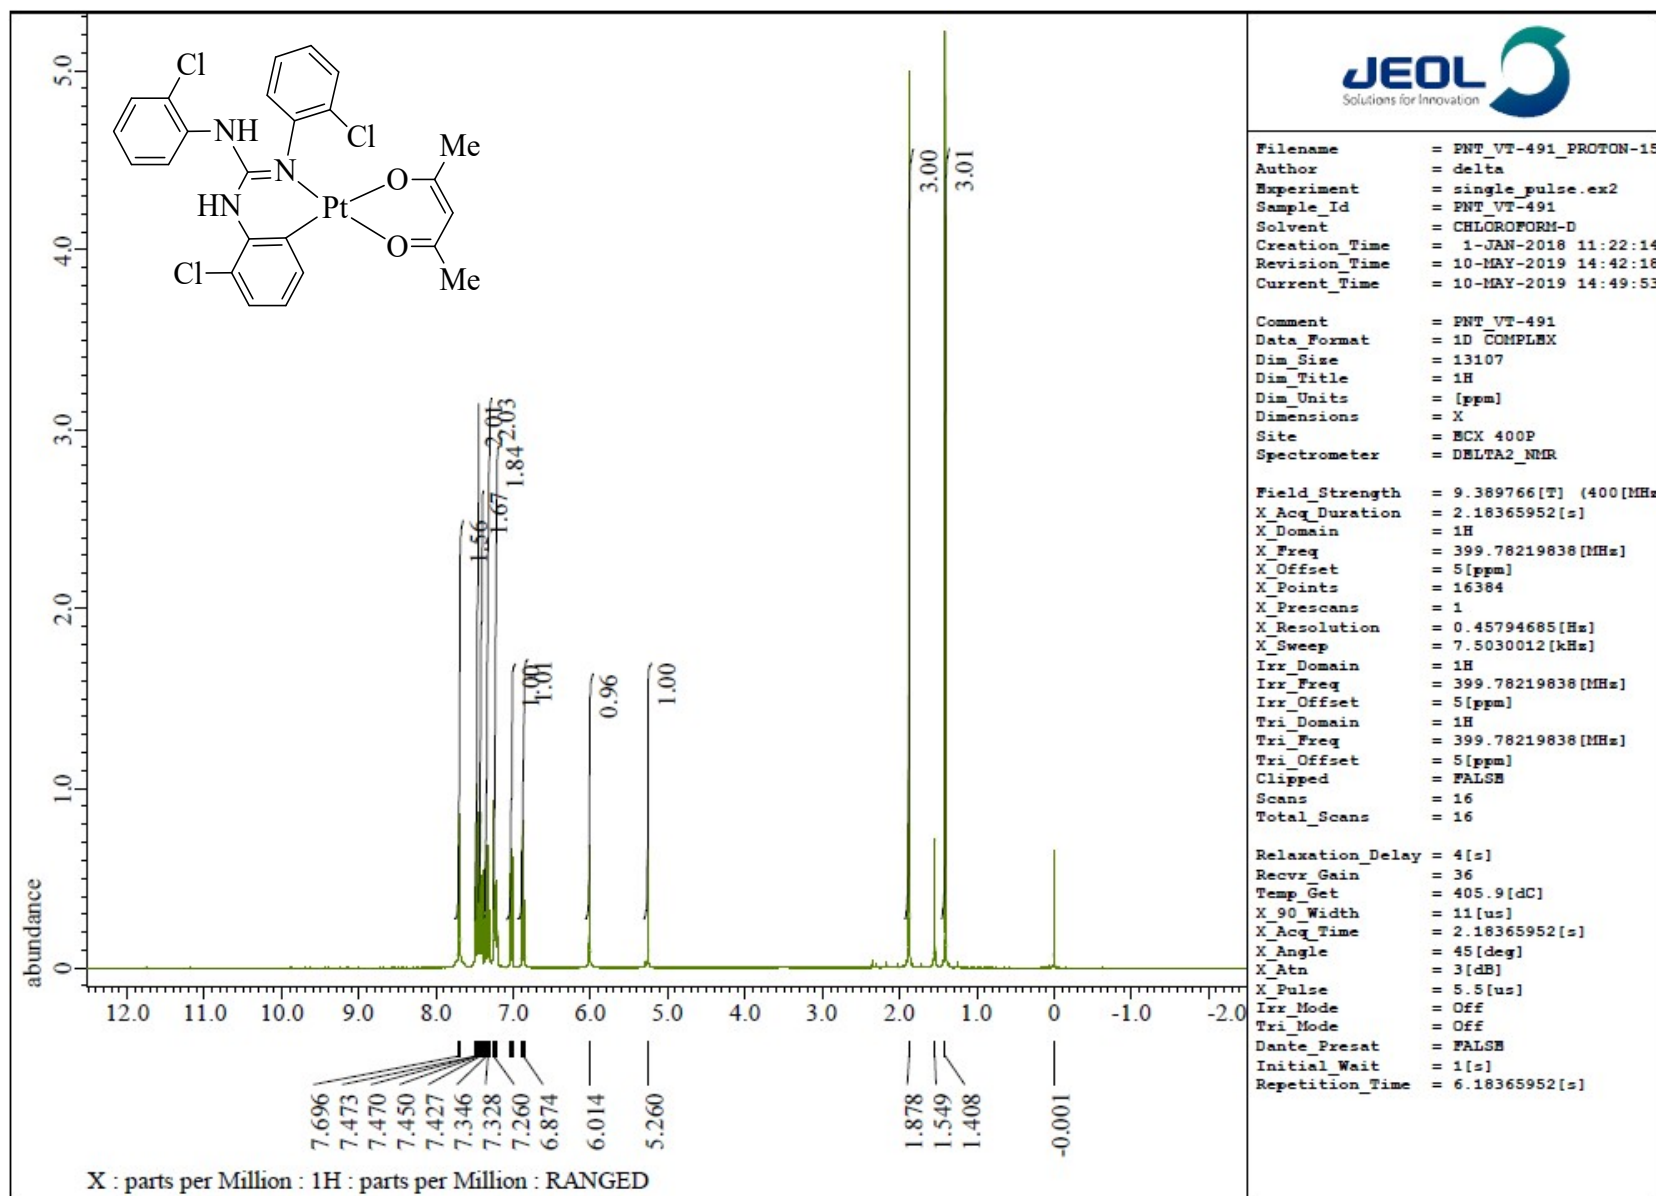

Fig. S142 <sup>1</sup>H NMR (CDCl<sub>3</sub>, 400 MHz) spectrum of 16.



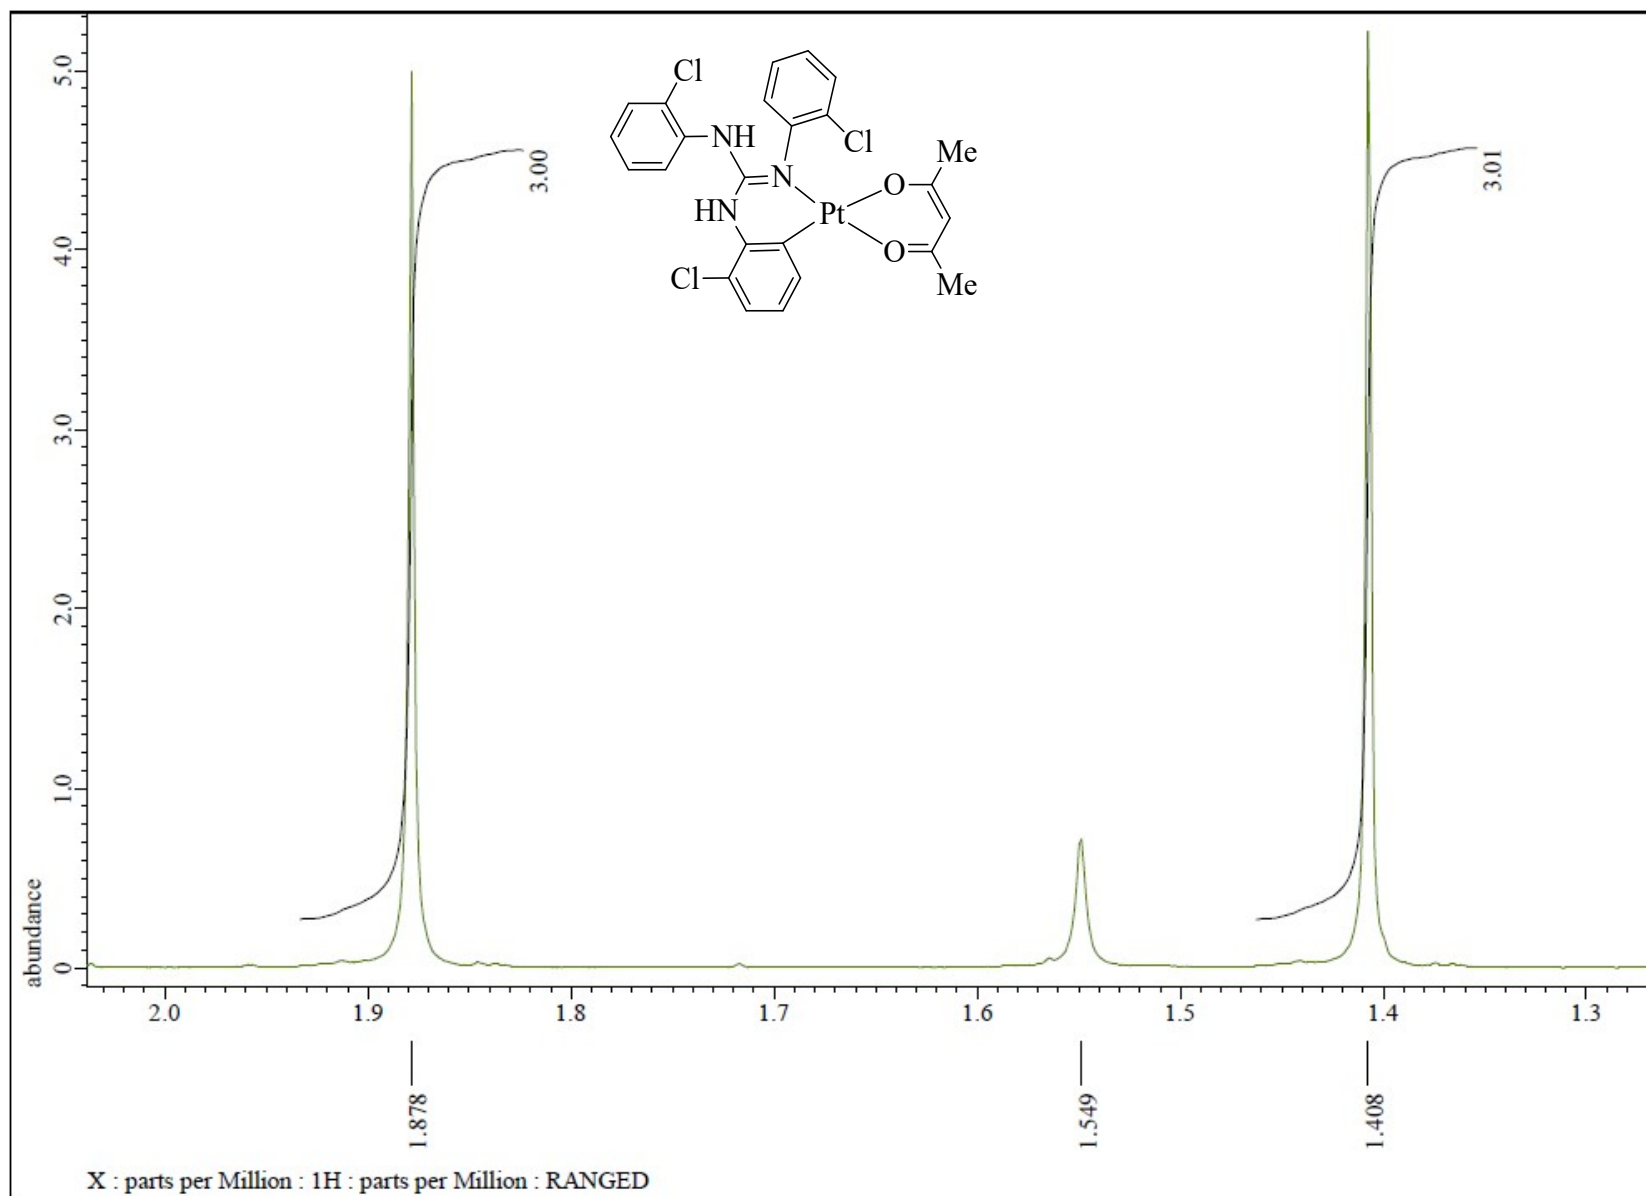

Fig. S143  $^1\text{H}$  NMR ( $\text{CDCl}_3$ , 400 MHz) spectrum of **16** in the indicated region.

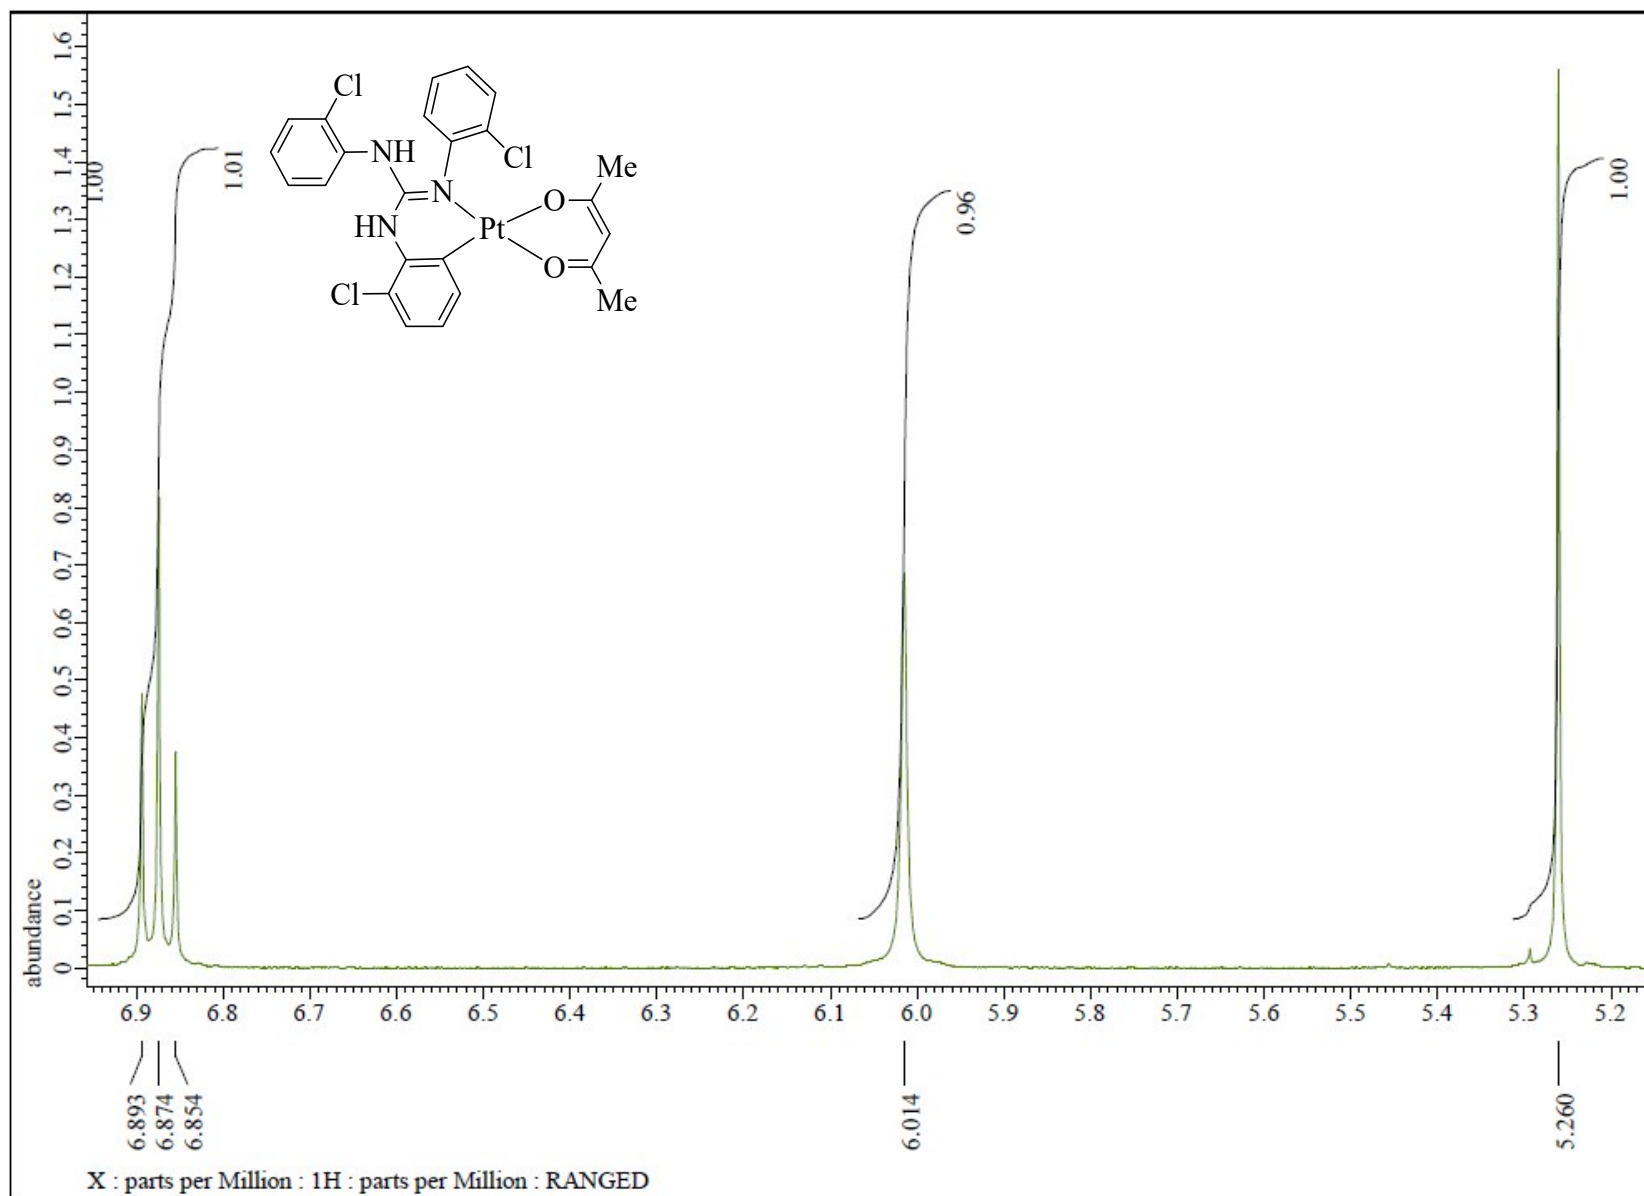

Fig. S144  $^1\text{H}$  NMR ( $\text{CDCl}_3$ , 400 MHz) spectrum of **16** in the indicated region.

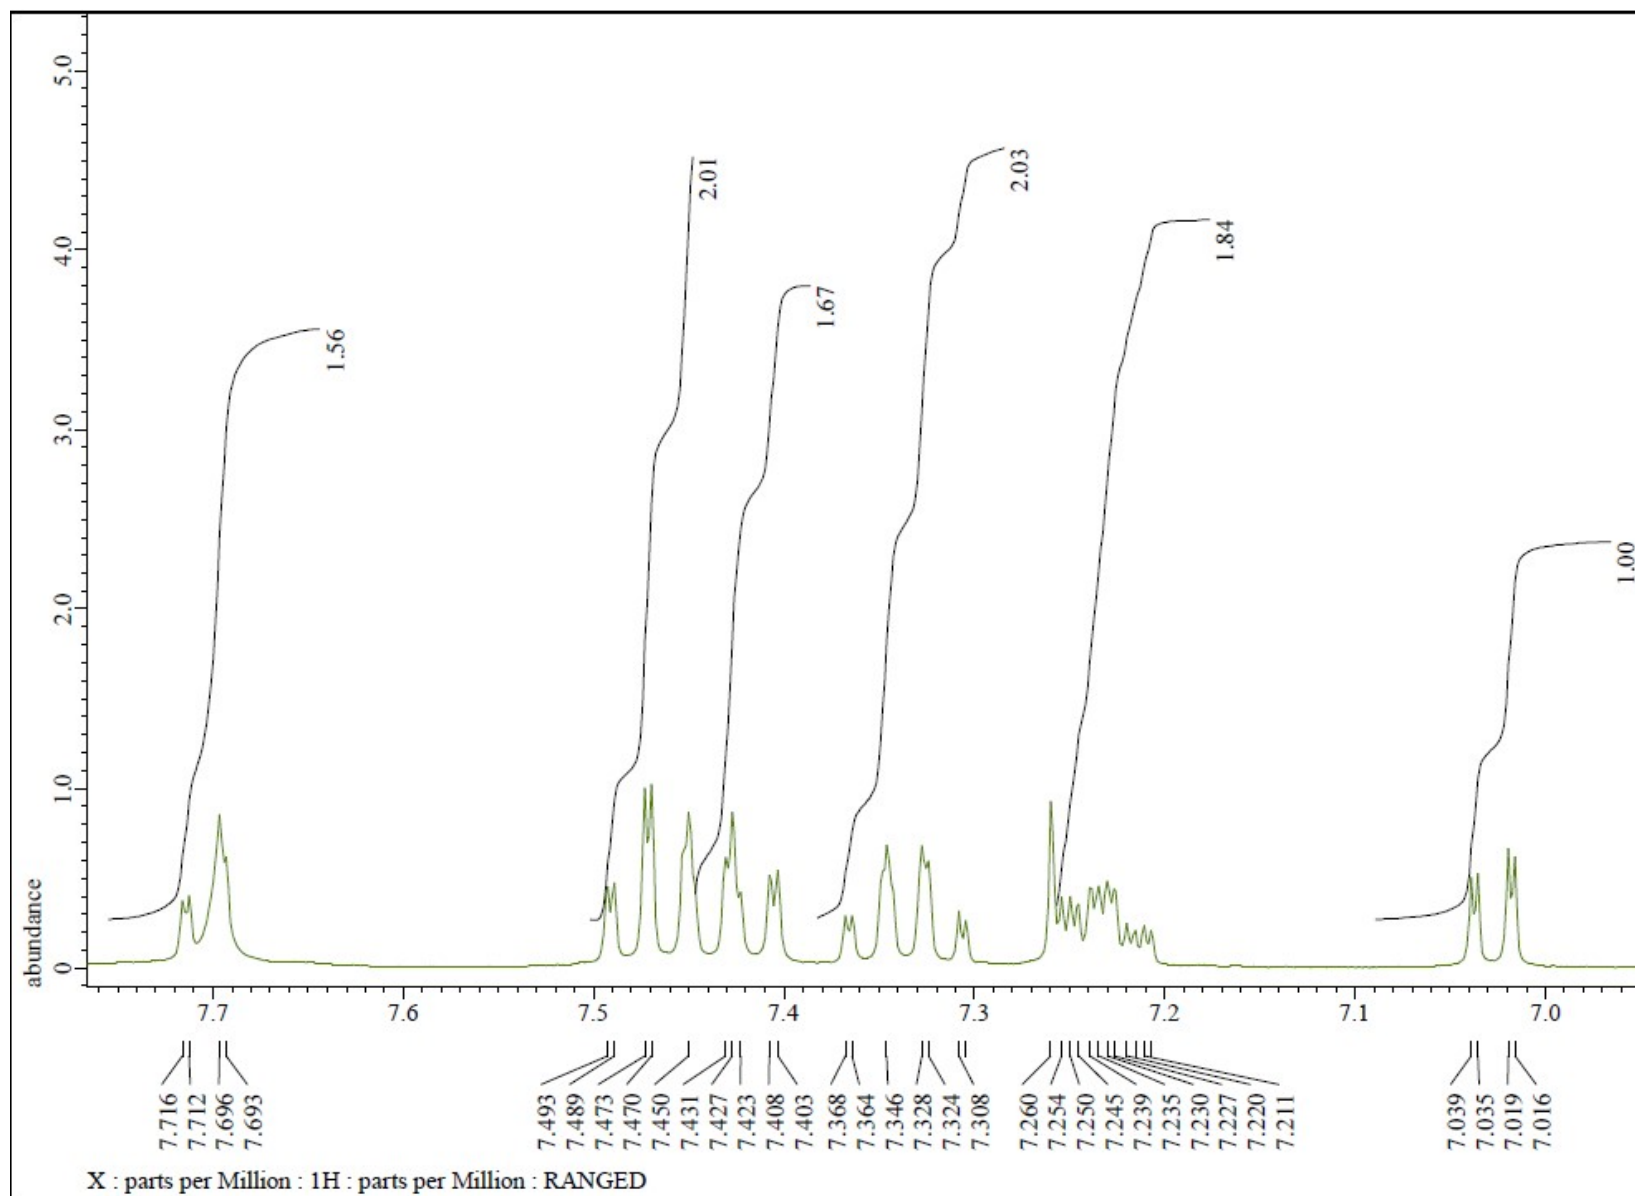

Fig. S145  $^1\text{H}$  NMR ( $\text{CDCl}_3$ , 400 MHz) spectrum of **16** in the indicated region.

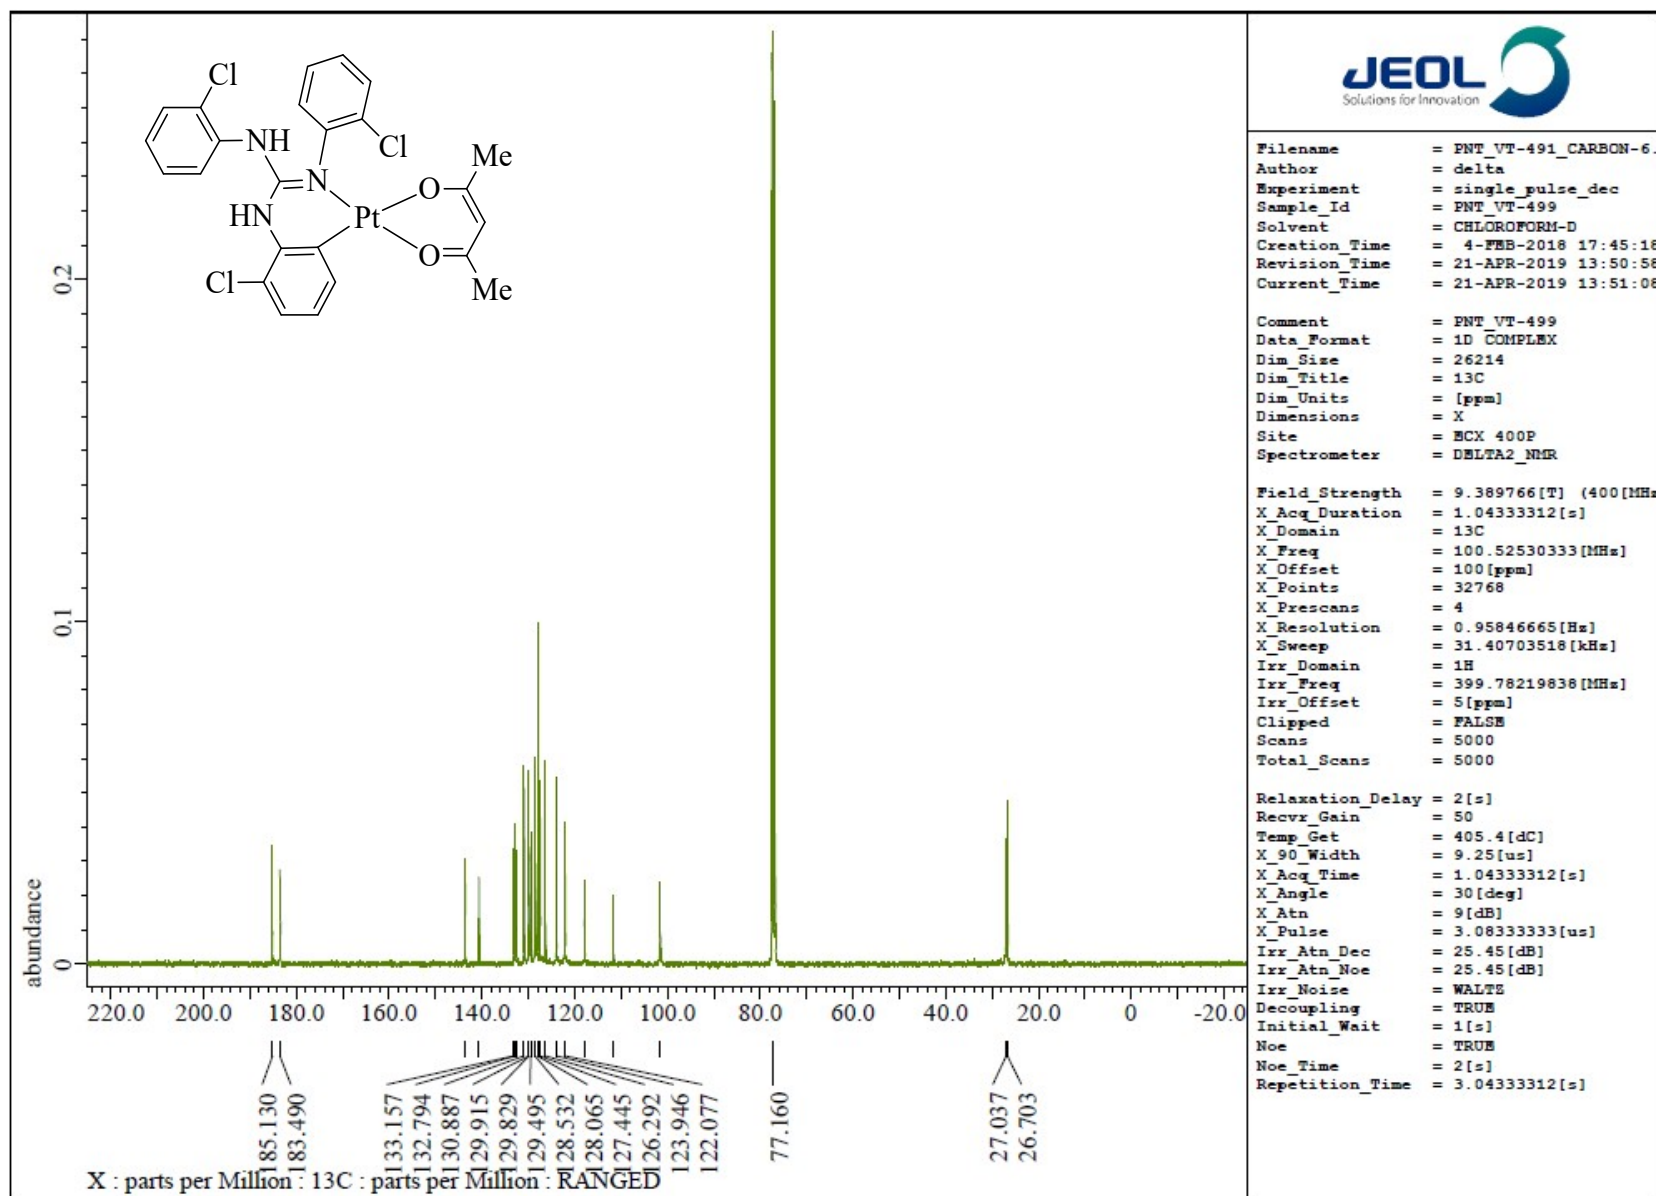

Fig. S146  $^{13}\text{C}\{^1\text{H}\}$  NMR ( $\text{CDCl}_3$ , 100.5 MHz) spectrum of 16.

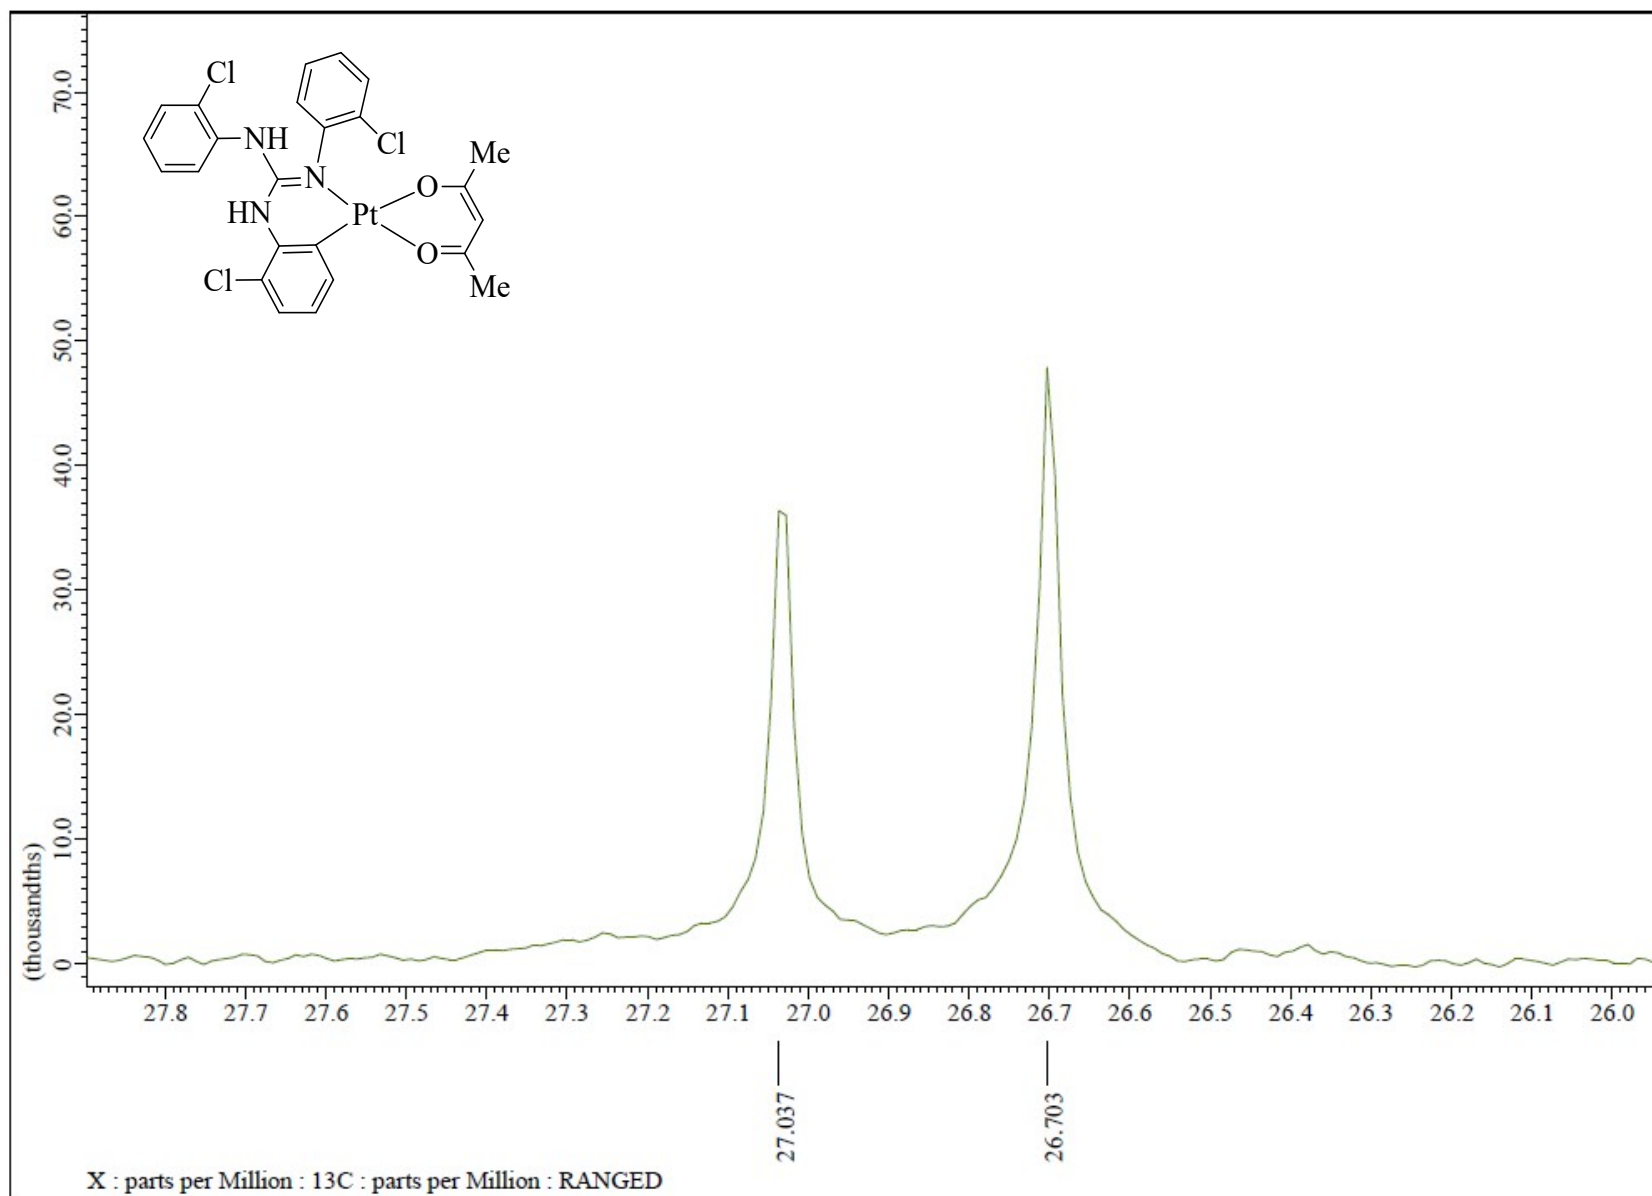

Fig. S147  $^{13}\text{C}$   $\{^1\text{H}\}$  NMR ( $\text{CDCl}_3$ , 100.5 MHz) spectrum of **16** in the indicated region.

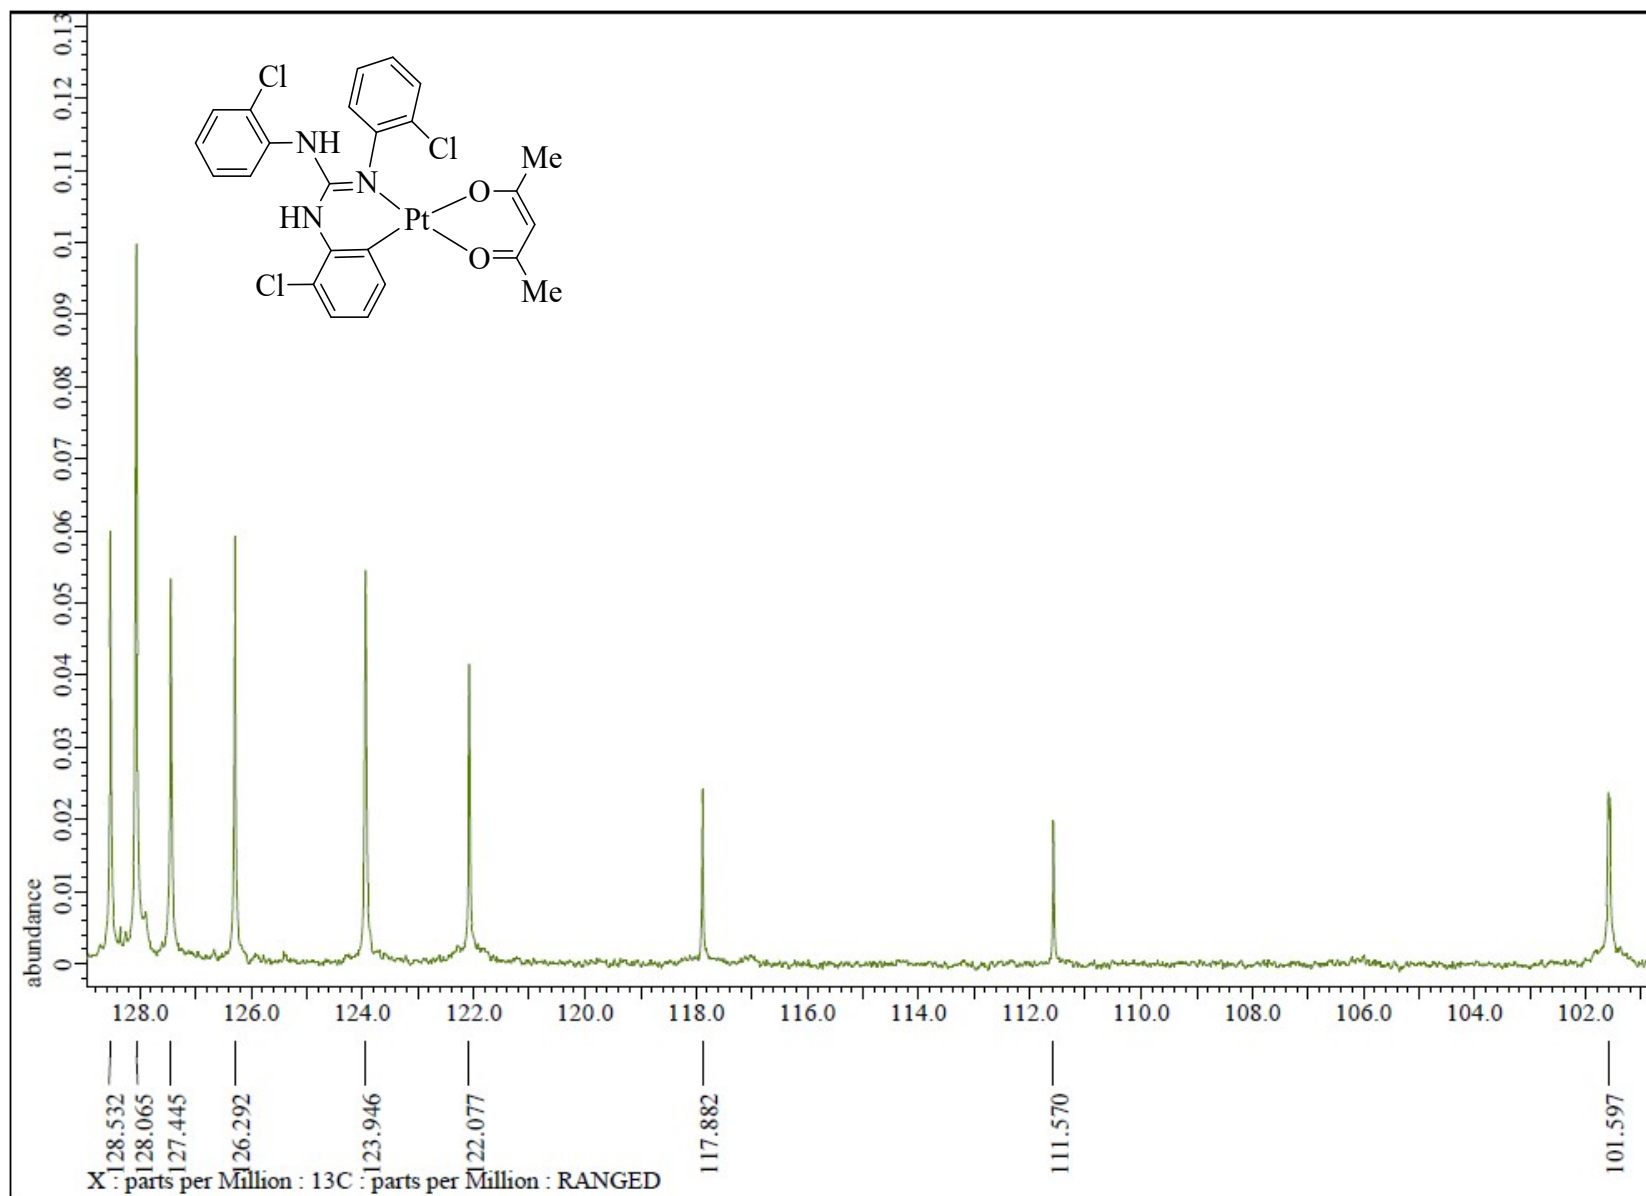

Fig. S148  $^{13}\text{C}\{^1\text{H}\}$  NMR (CDCl<sub>3</sub>, 100.5 MHz) spectrum of **16** in the indicated region.

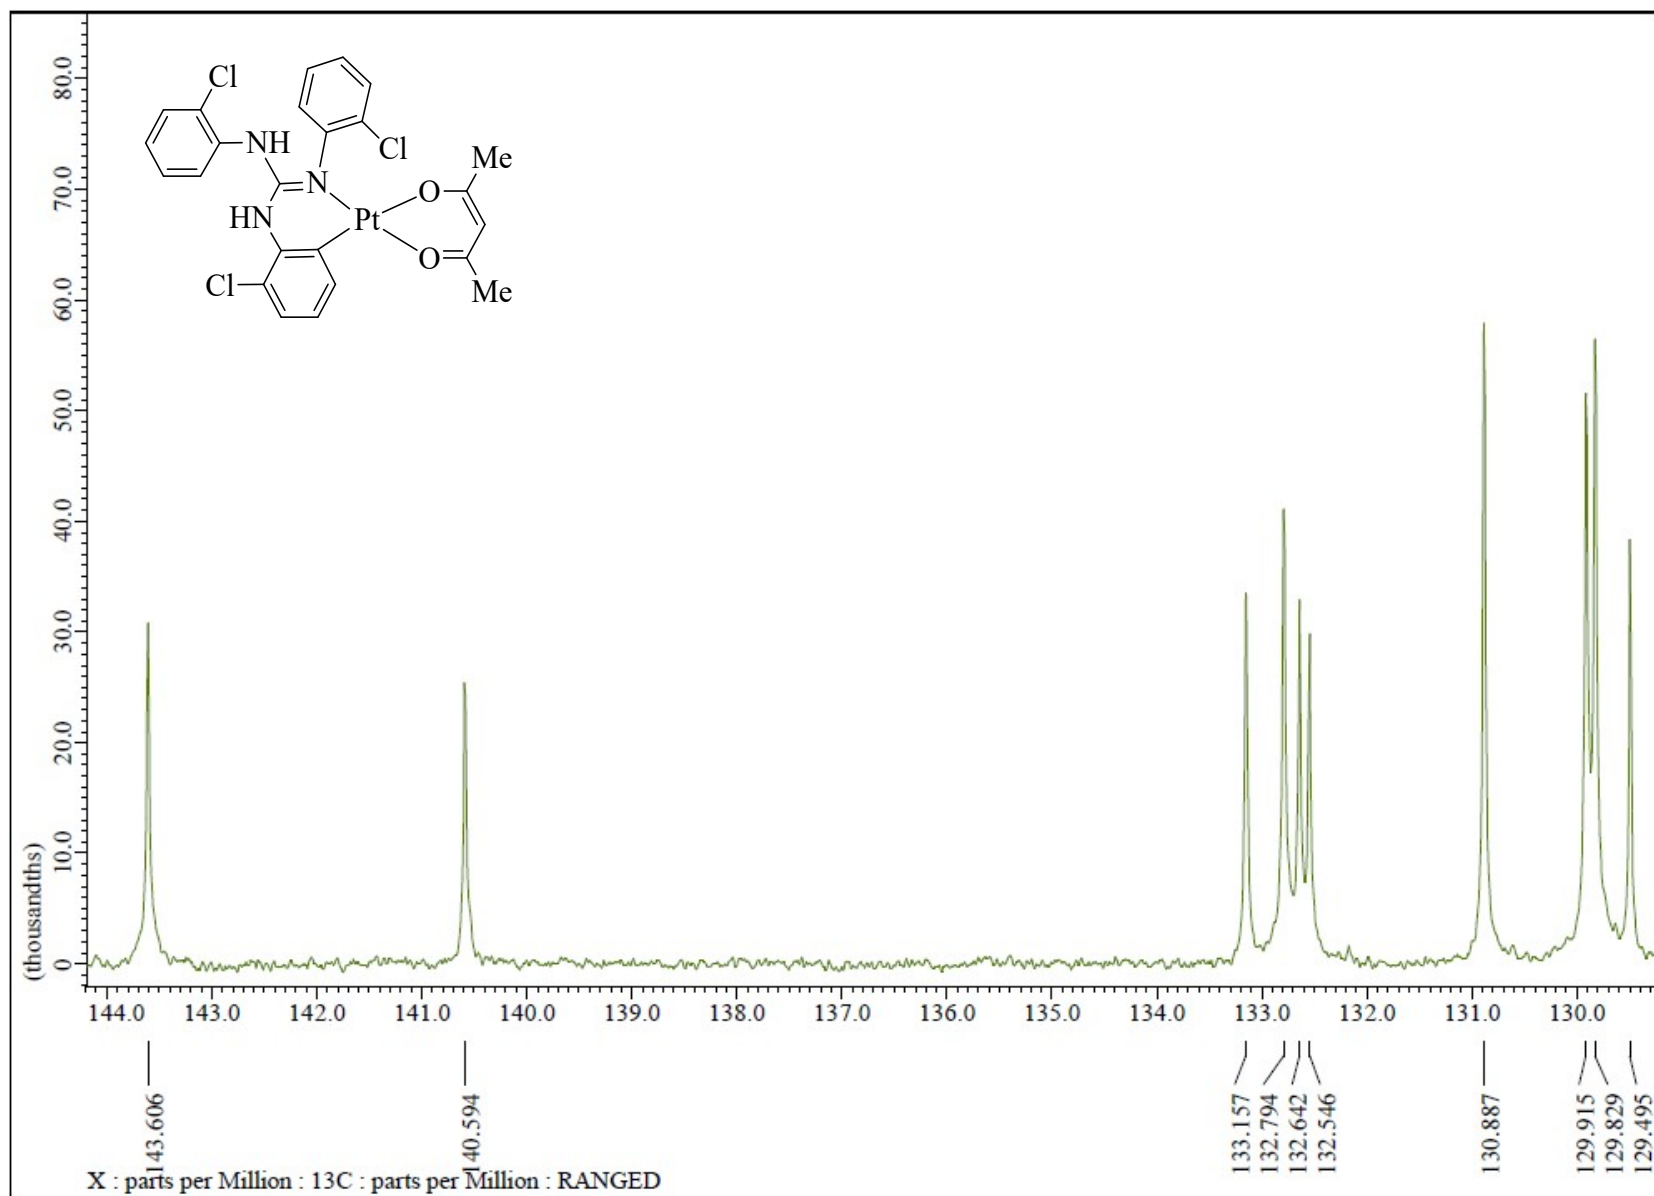

Fig. S149  $^{13}\text{C}\{^1\text{H}\}$  NMR (CDCl<sub>3</sub>, 100.5 MHz) spectrum of **16** in the indicated region.

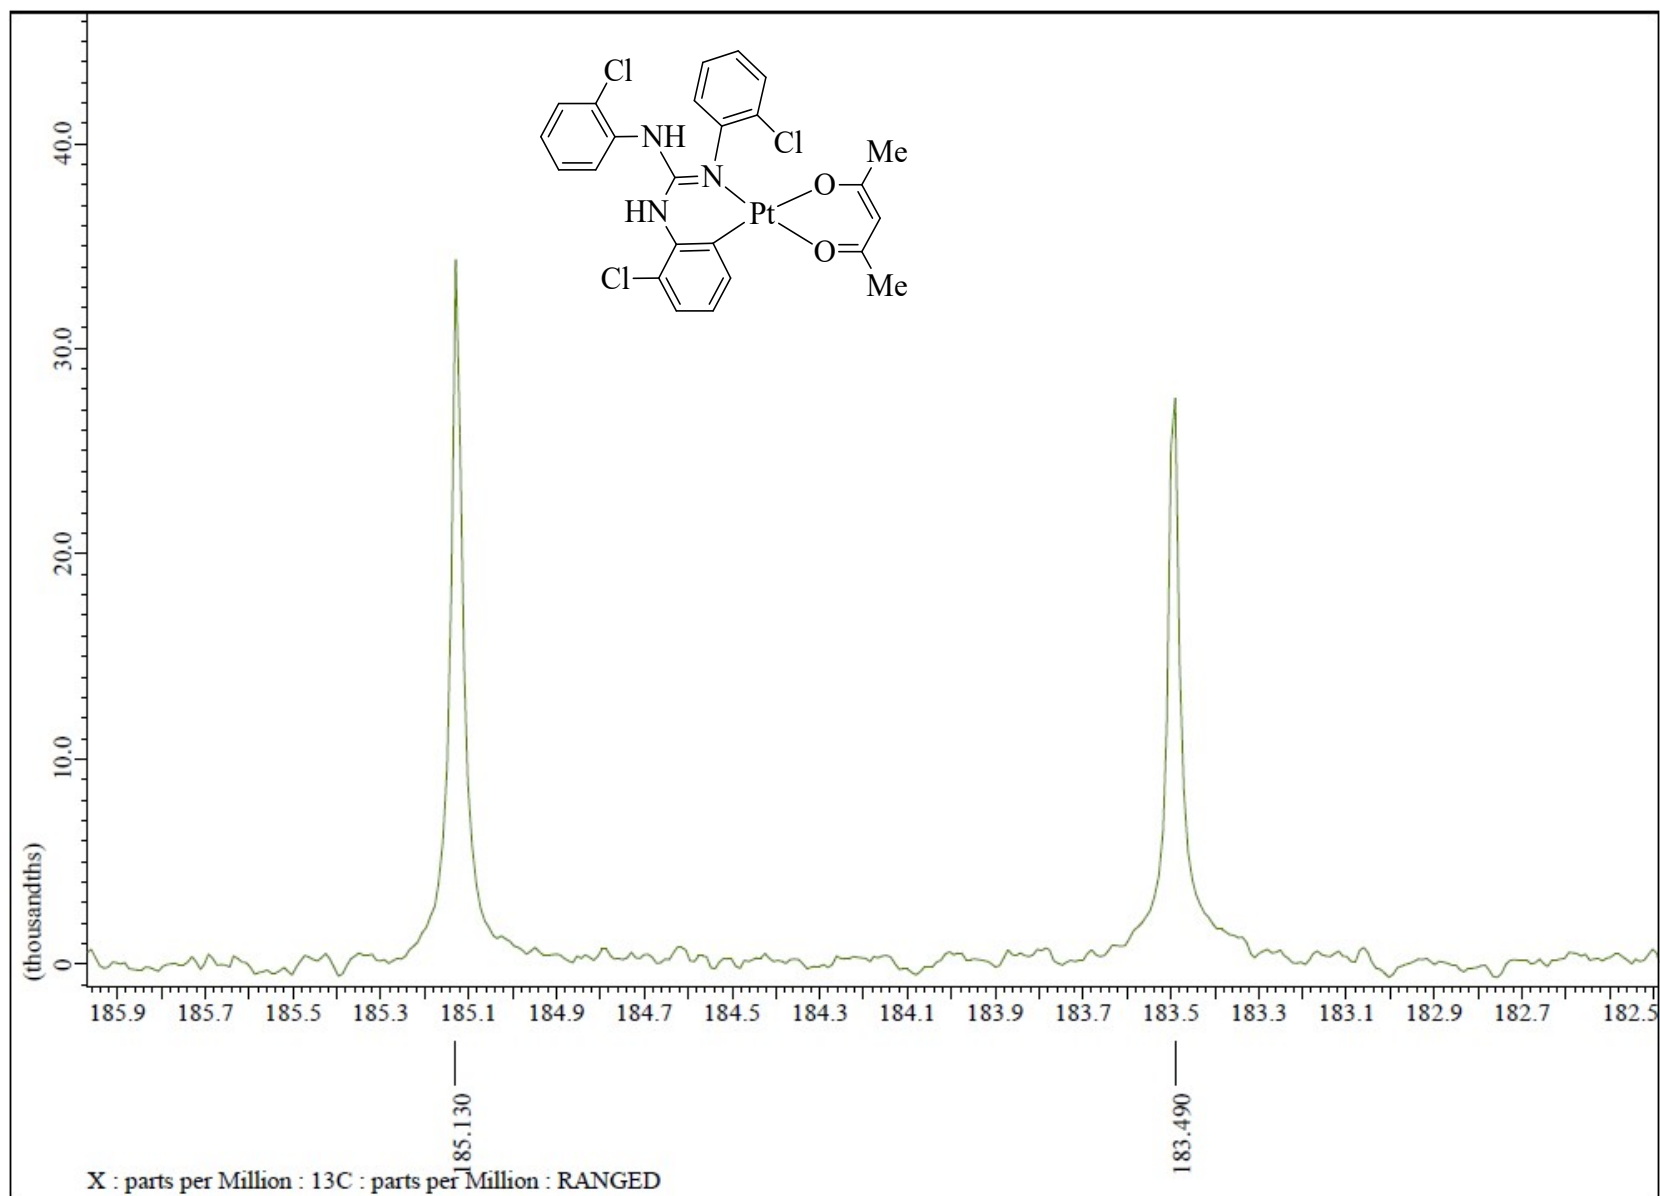

Fig. S150  $^{13}\text{C}\{^1\text{H}\}$  NMR ( $\text{CDCl}_3$ , 100.5 MHz) spectrum of **16** in the indicated region.



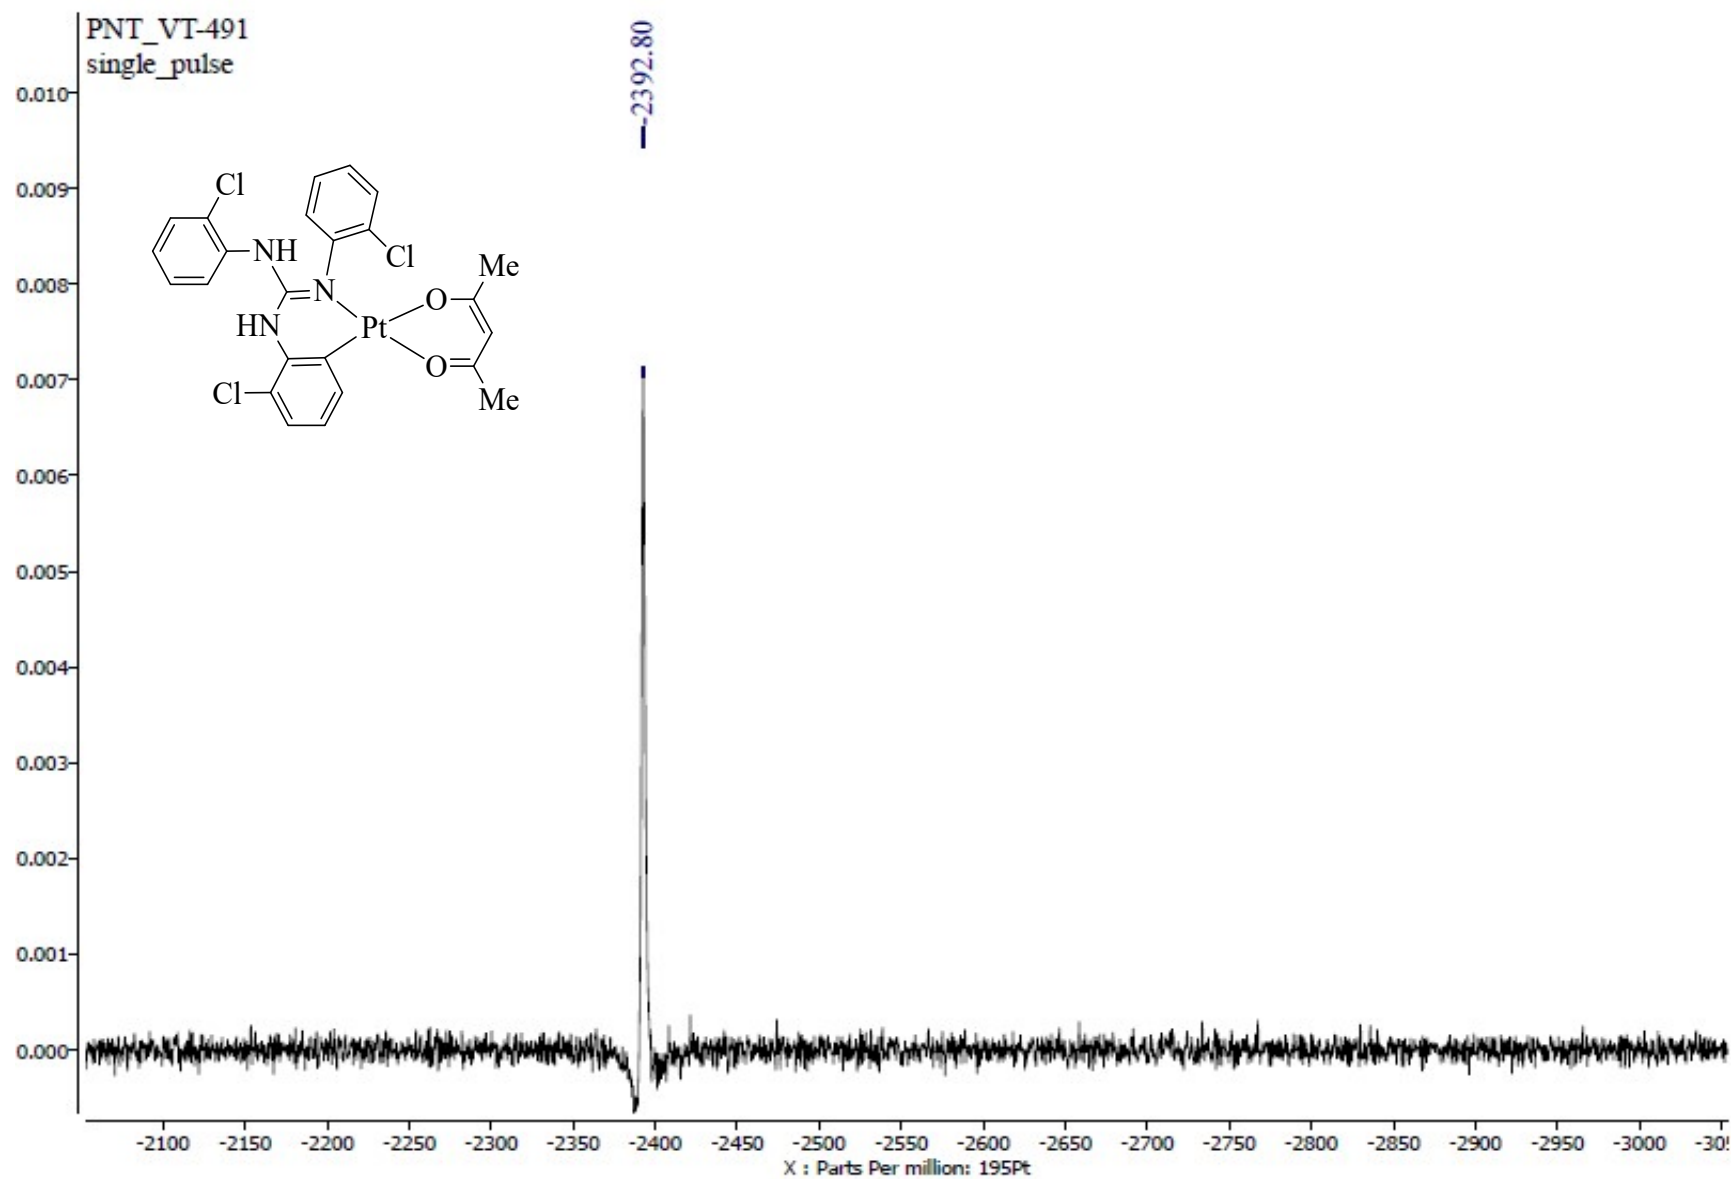

Fig. S151  $^{195}\text{Pt}\{^1\text{H}\}$  NMR ( $\text{CDCl}_3$ , 85.8 MHz) spectrum of 16.

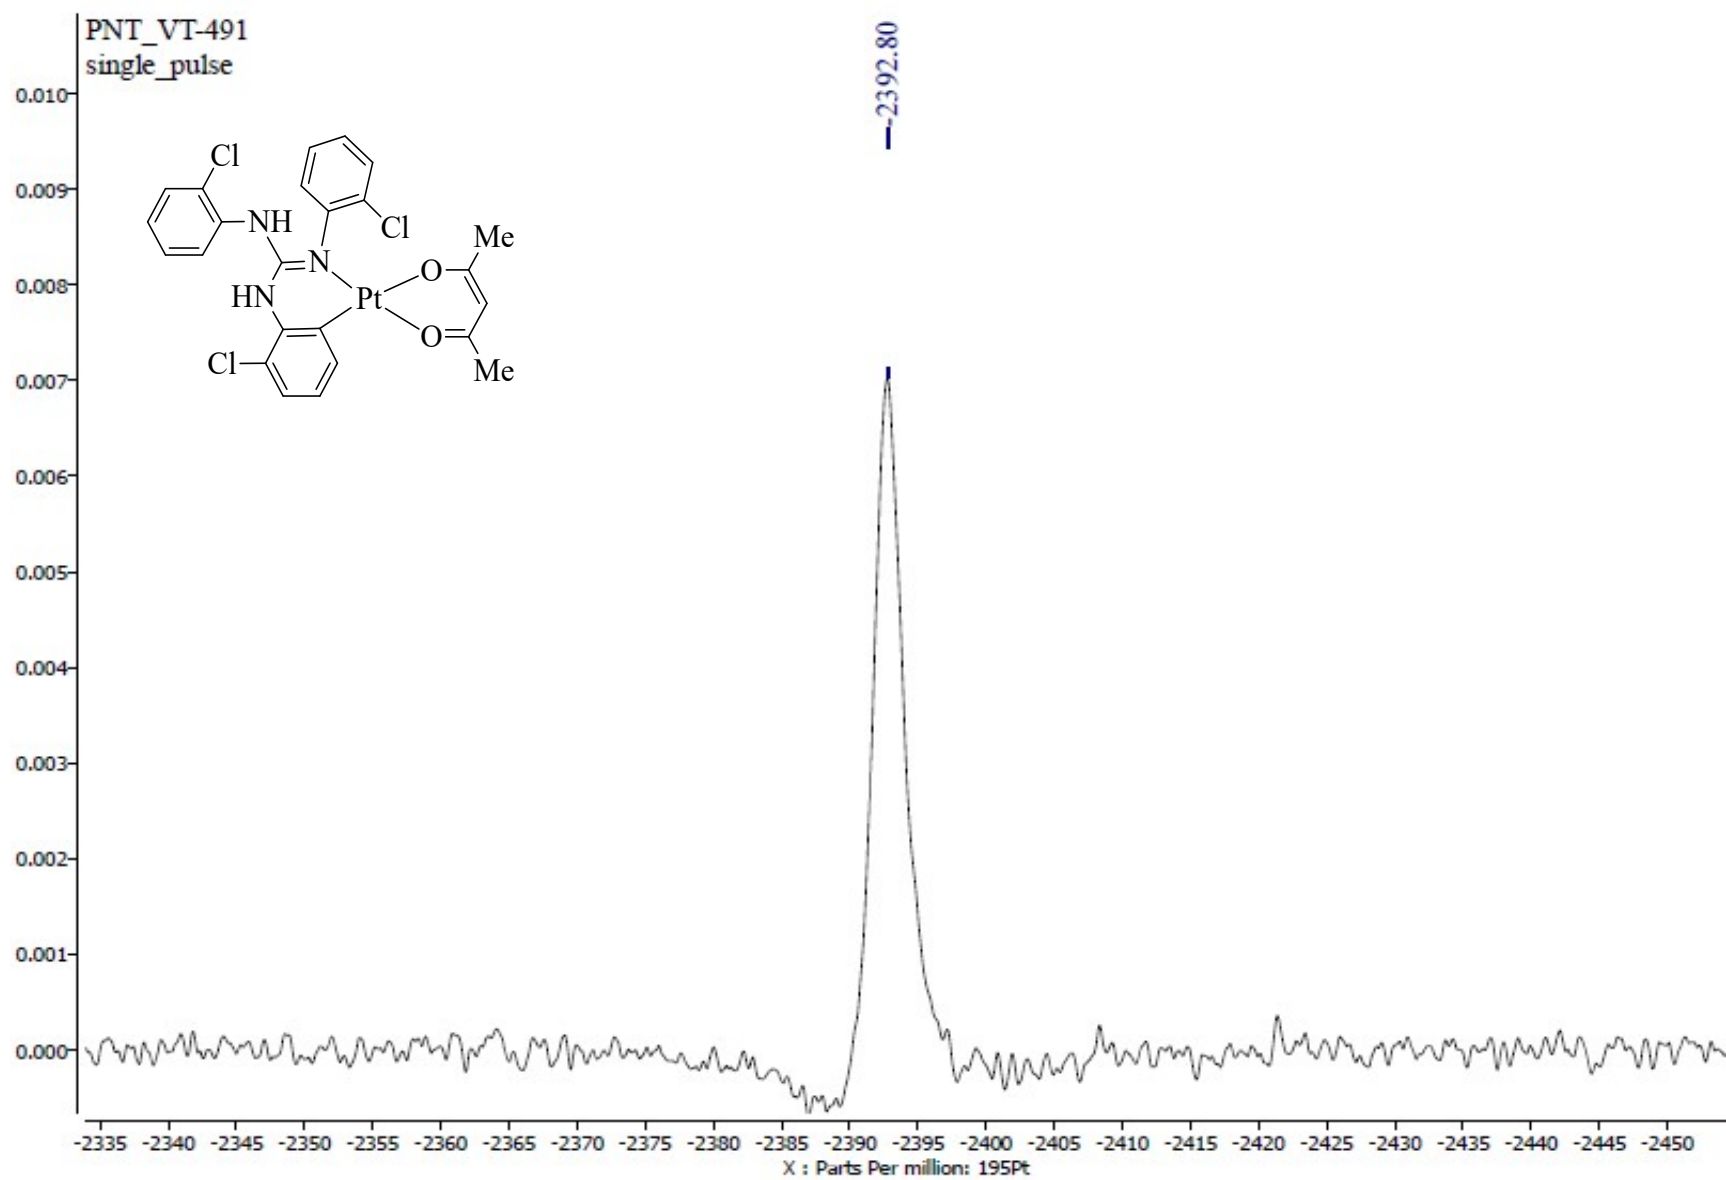

Fig. S152  $^{195}\text{Pt}\{^1\text{H}\}$  NMR ( $\text{CDCl}_3$ , 85.8 MHz) spectrum of **16** in the indicated region.

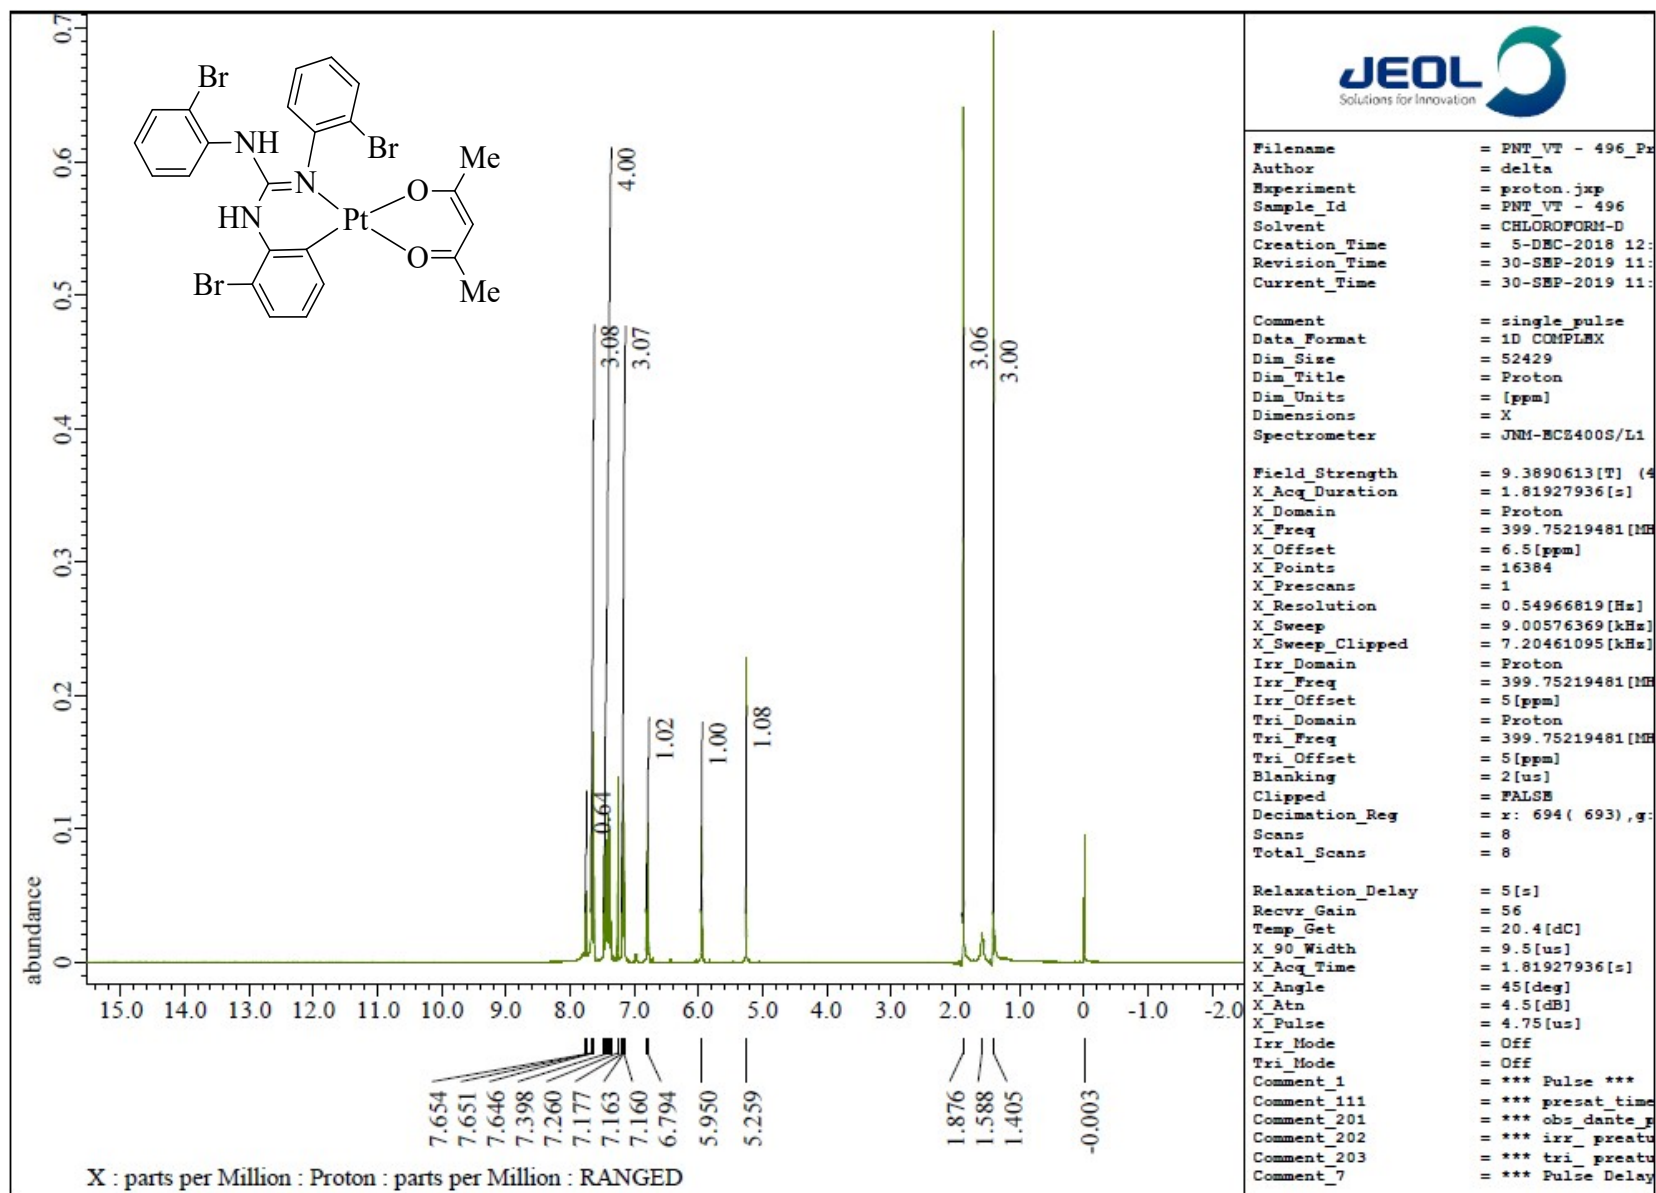

Fig. S153 <sup>1</sup>H NMR (CDCl<sub>3</sub>, 400 MHz) spectrum of 17.

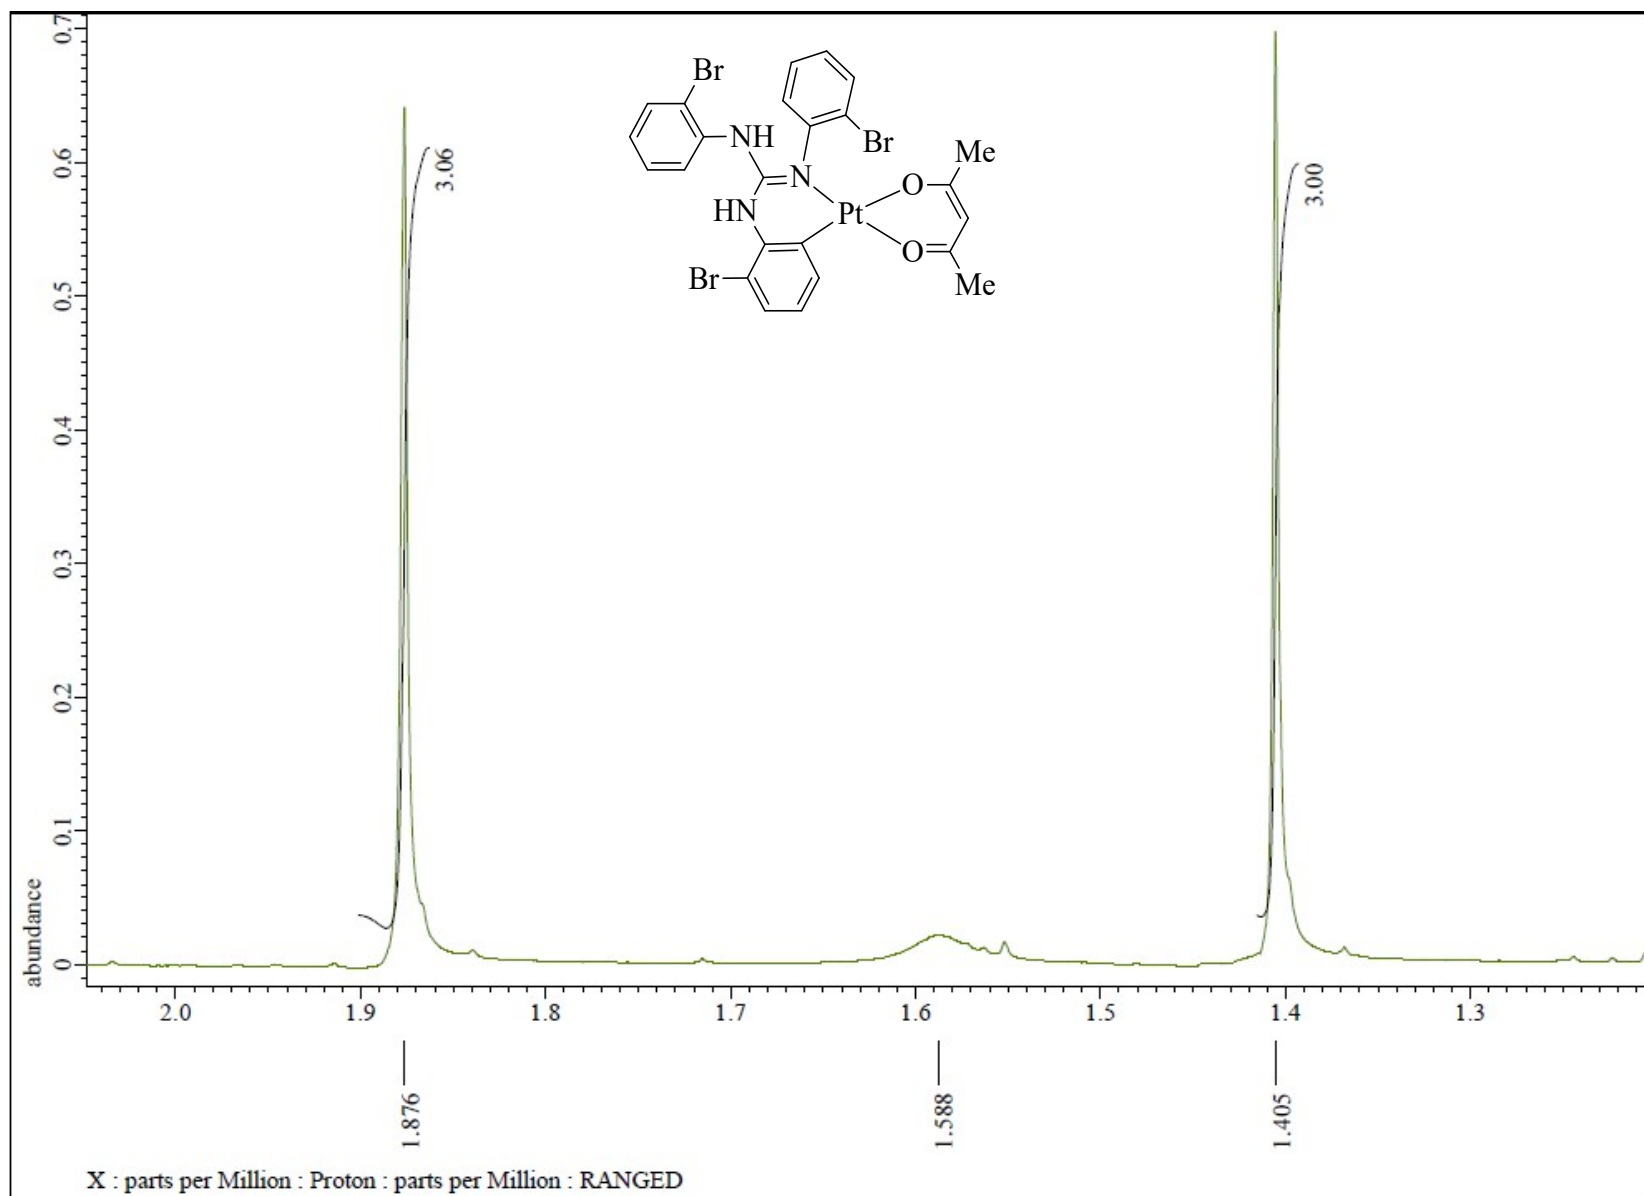

Fig. S154  $^1\text{H}$  NMR (CDCl<sub>3</sub>, 400 MHz) spectrum of **17** in the indicated region.

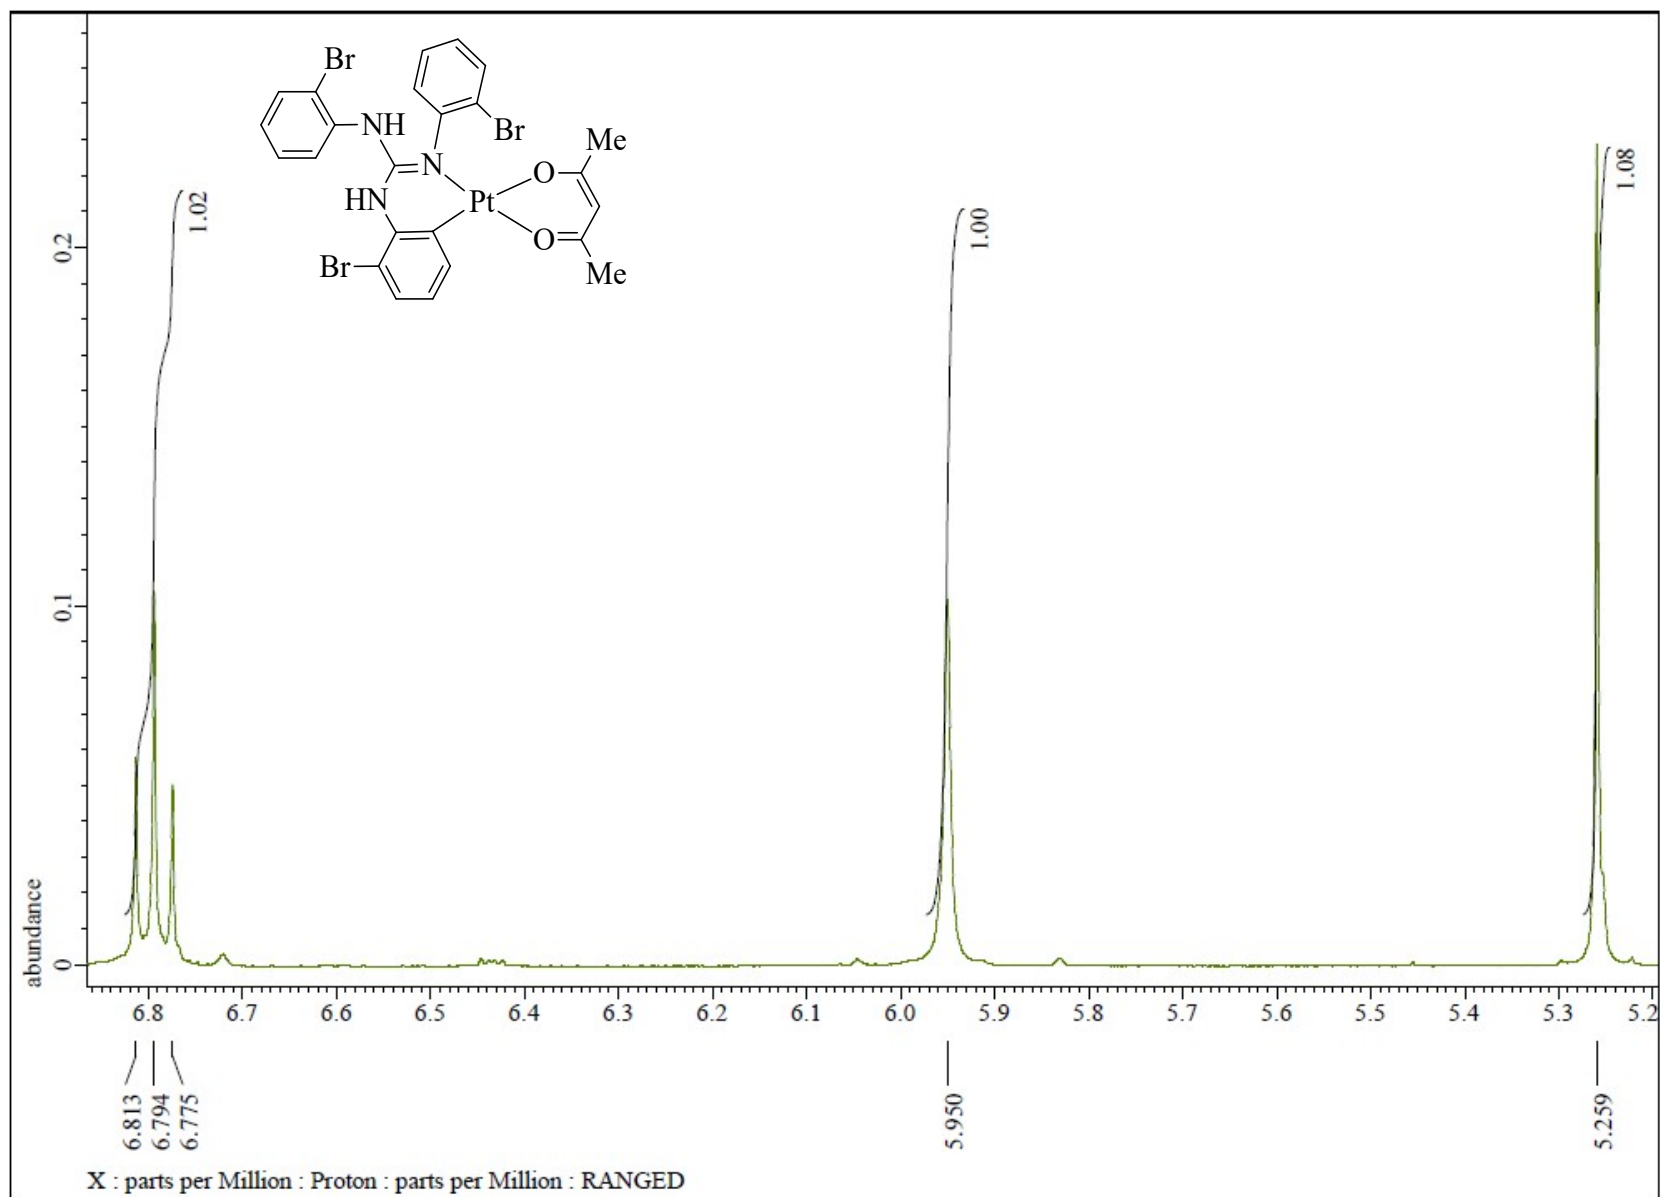

Fig. S155  $^1\text{H}$  NMR (CDCl<sub>3</sub>, 400 MHz) spectrum of **17** in the indicated region.

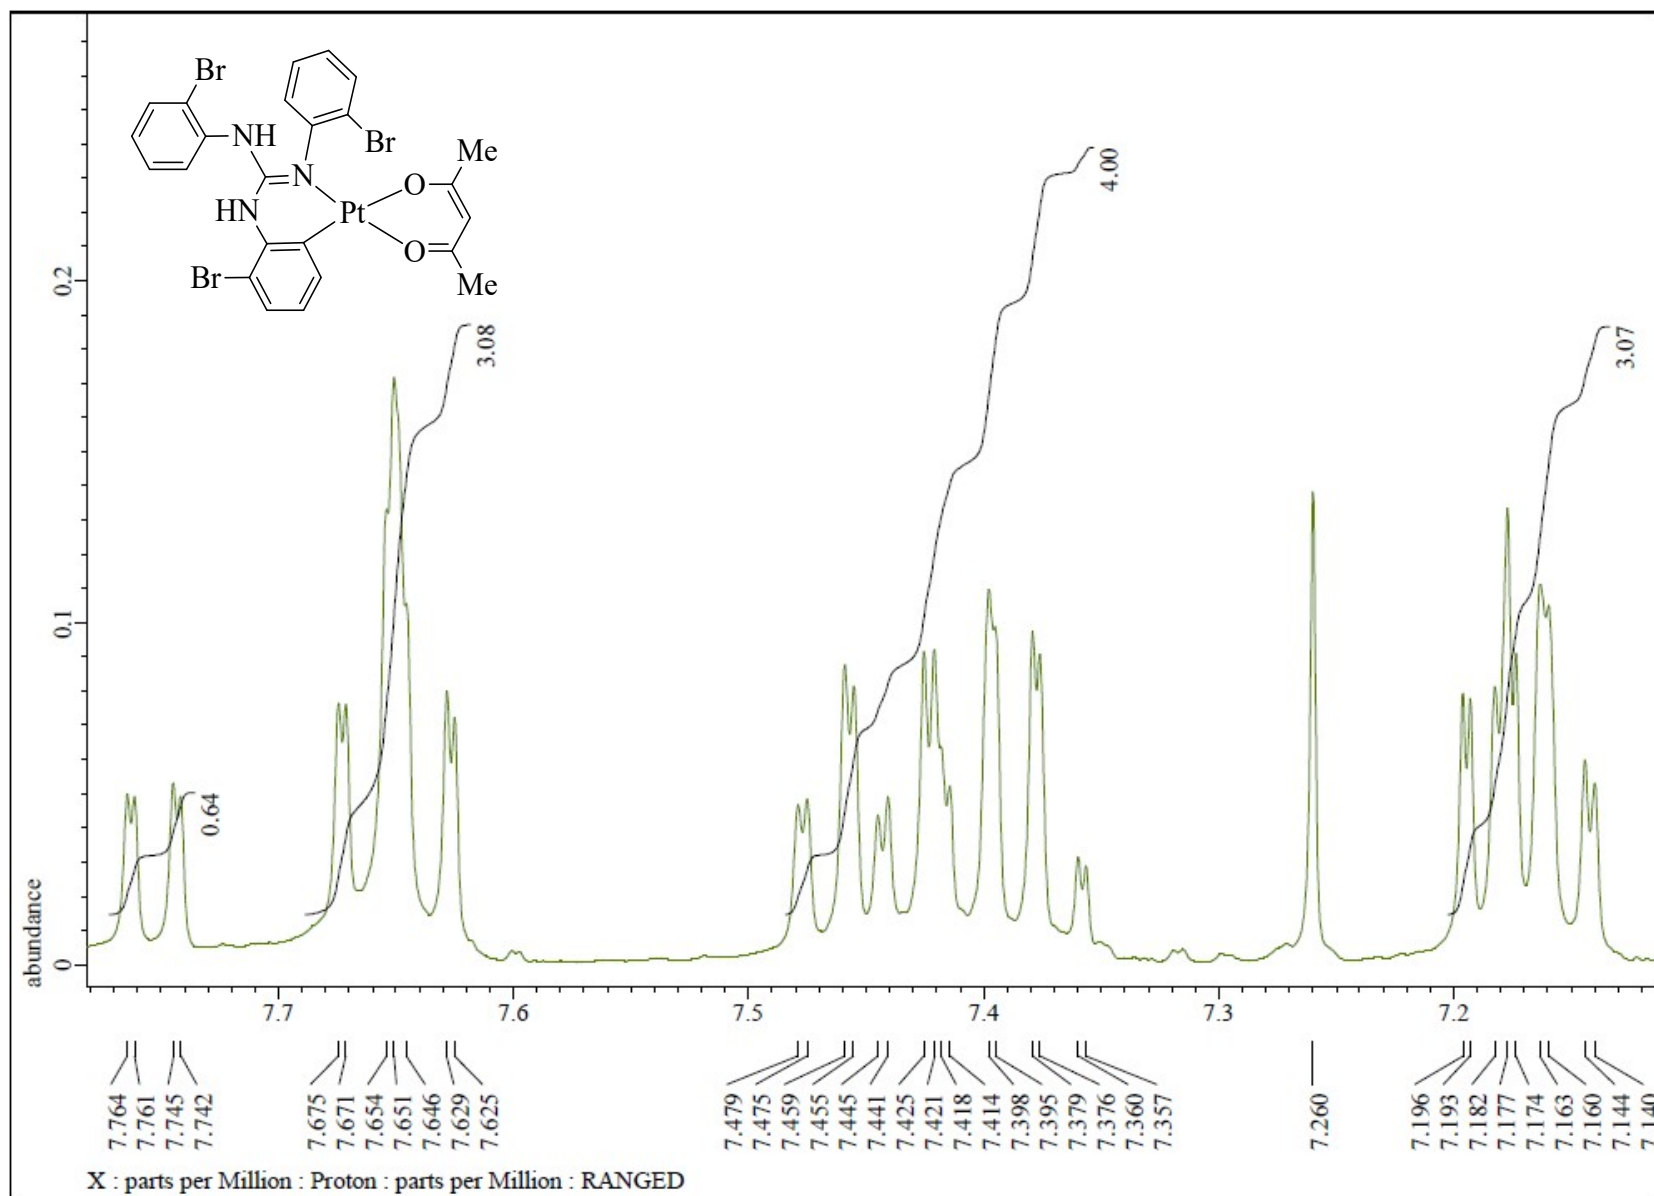

Fig. S156  $^1\text{H NMR}$  (CDCl<sub>3</sub>, 400 MHz) spectrum of **17** in the indicated region.

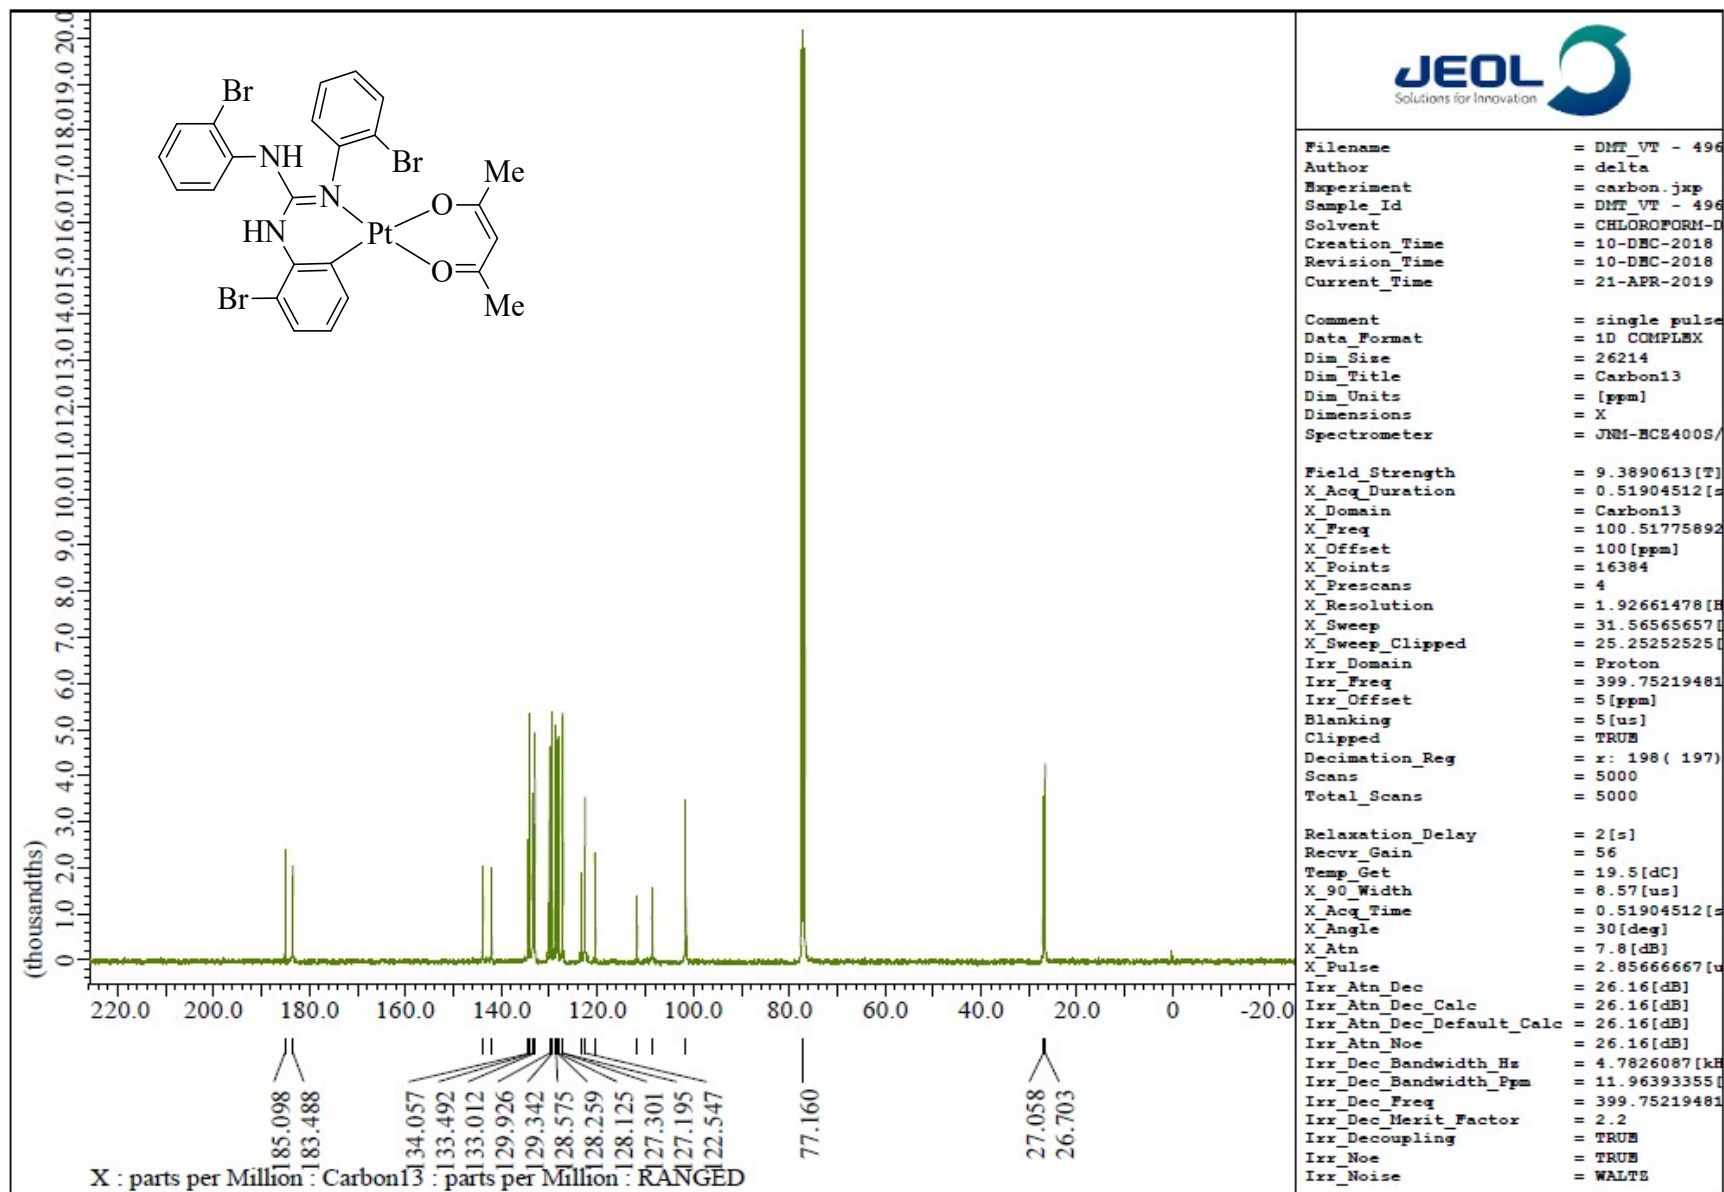

Fig. S157  $^{13}\text{C}\{^1\text{H}\}$  NMR ( $\text{CDCl}_3$ , 100.5 MHz) spectrum of 17.

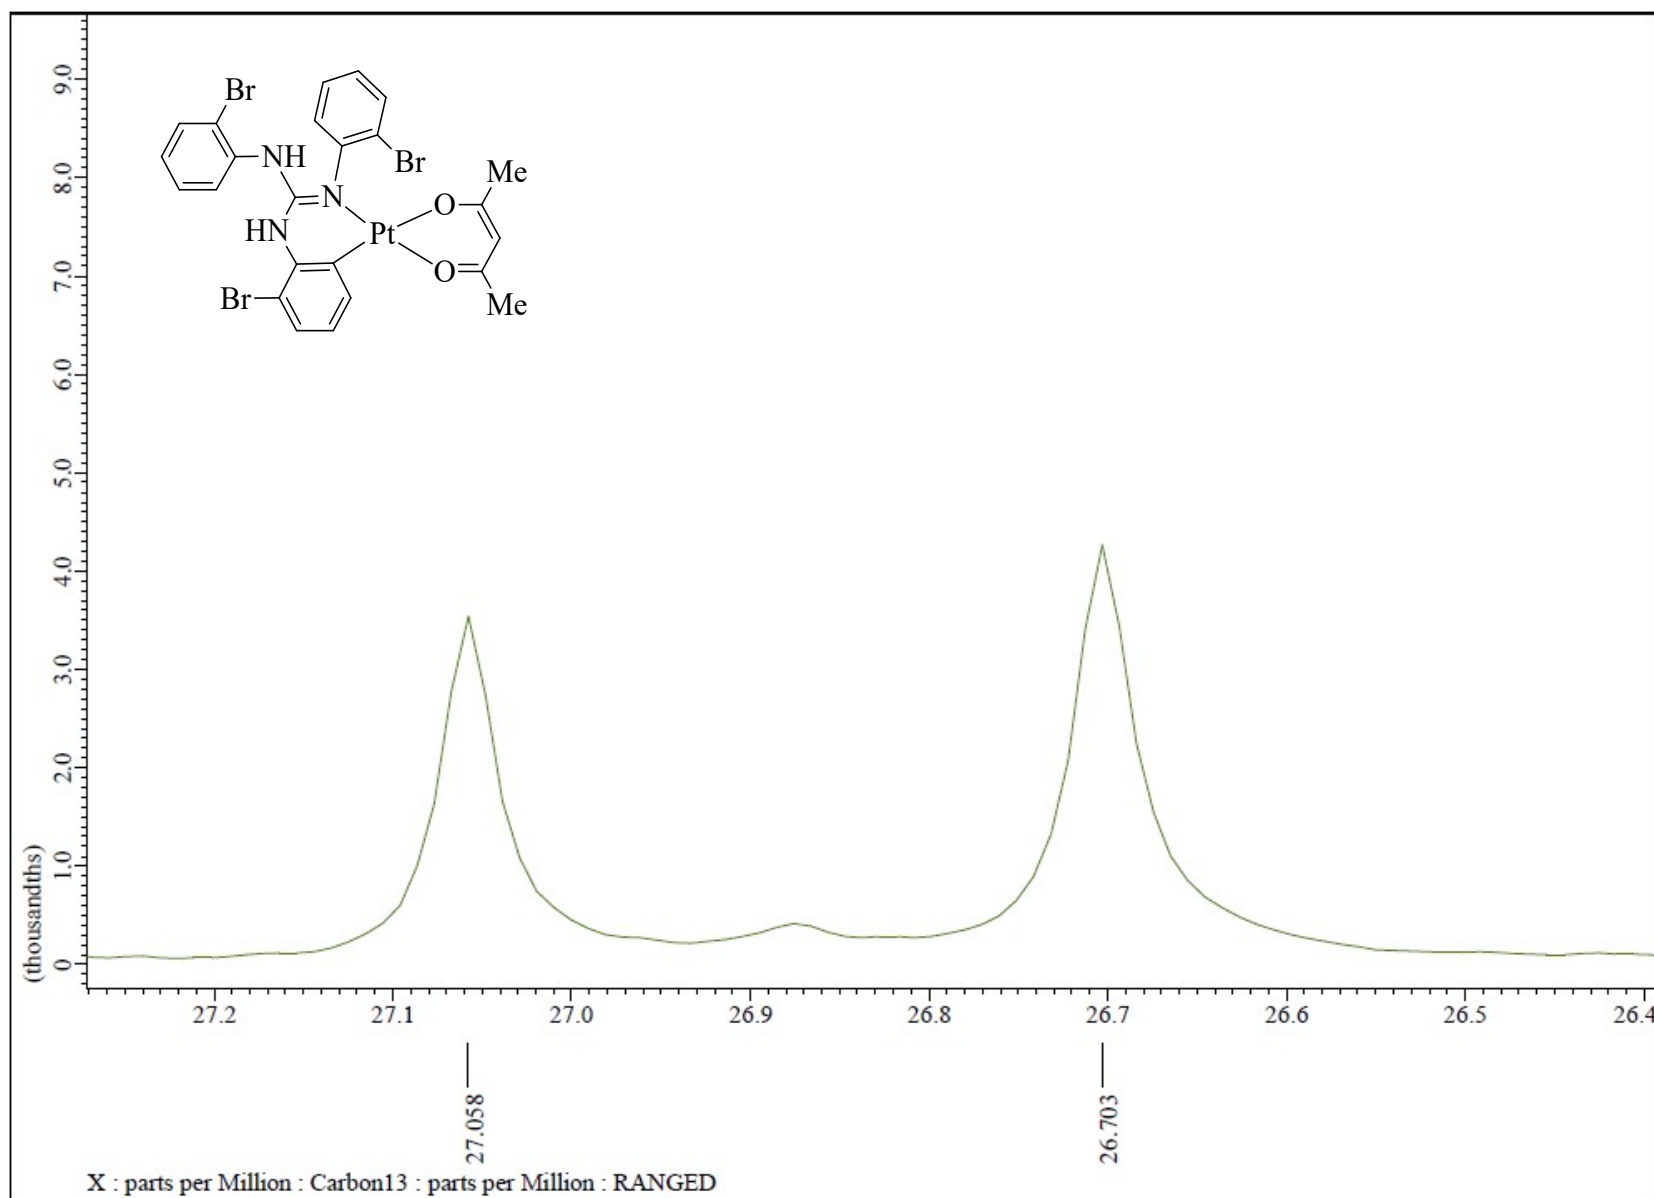

Fig. S158  $^{13}\text{C}\{^1\text{H}\}$  NMR ( $\text{CDCl}_3$ , 100.5 MHz) spectrum of **17** in the indicated region.



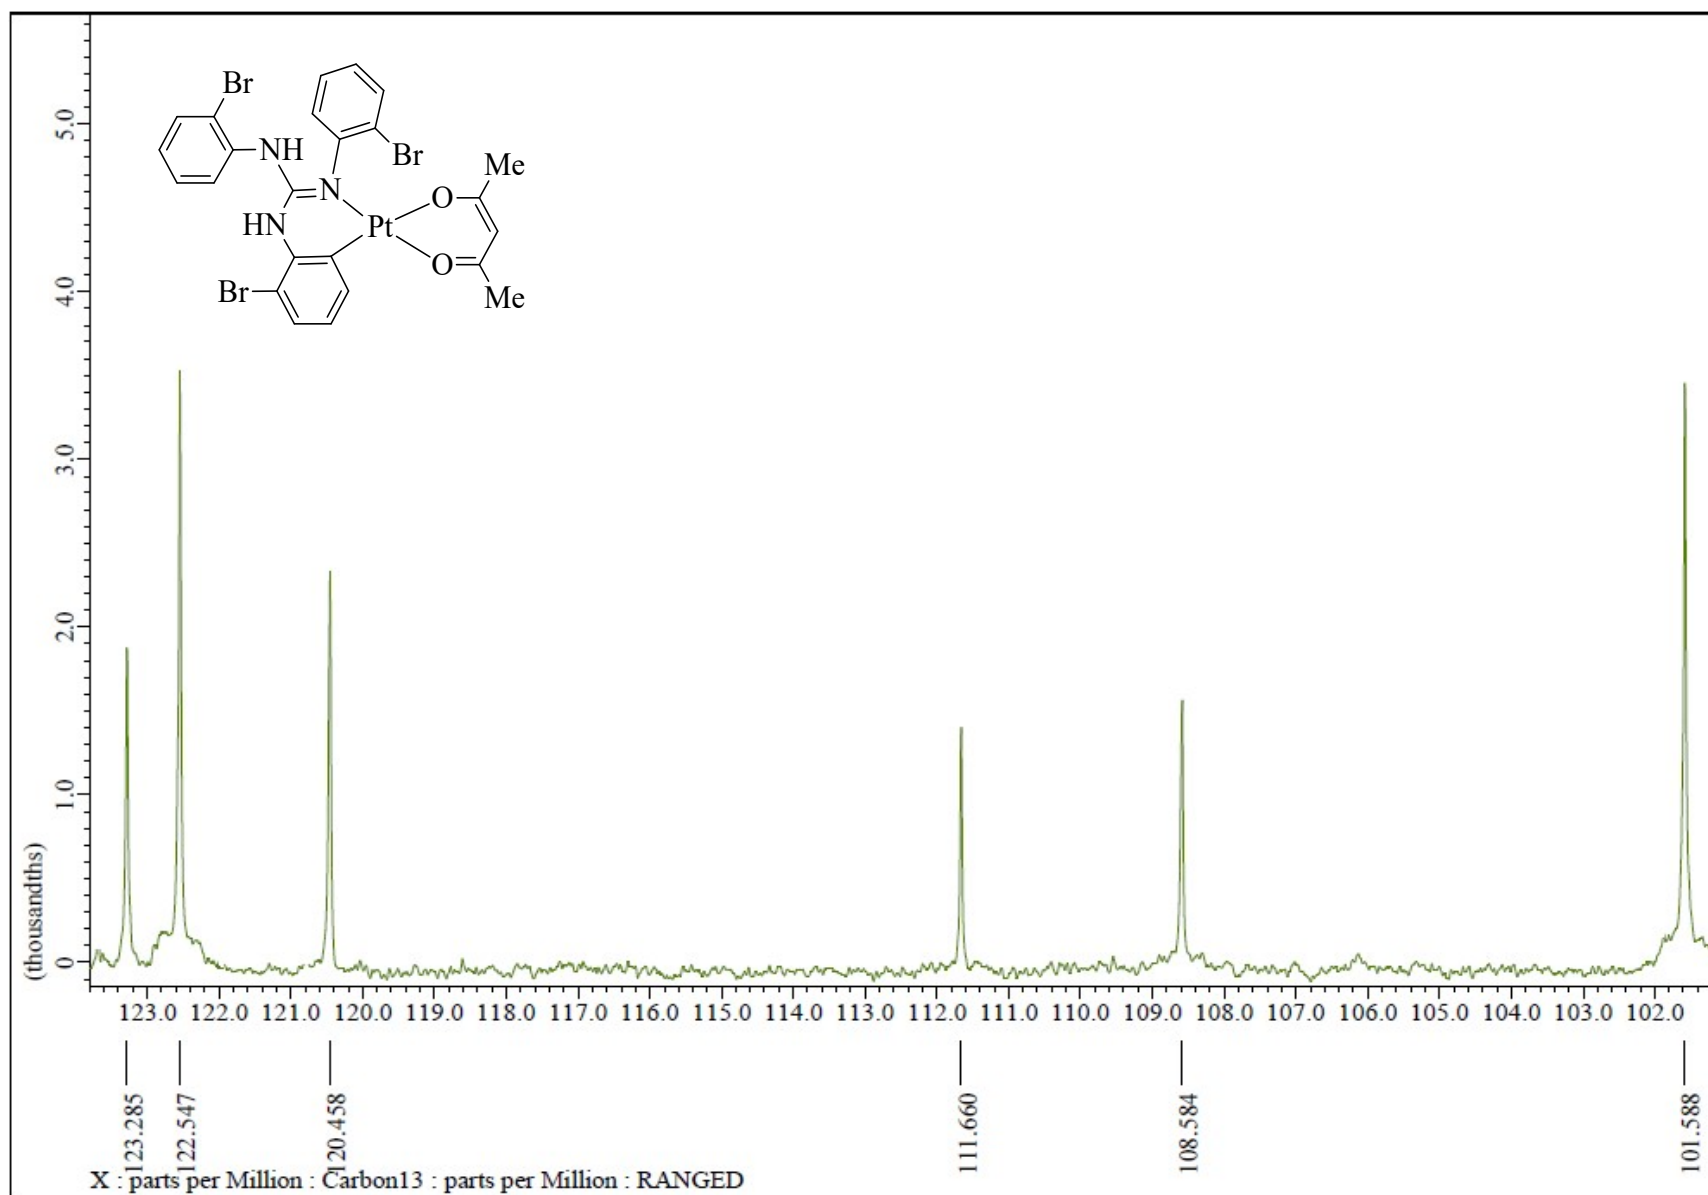

Fig. S159  $^{13}\text{C}\{^1\text{H}\}$  NMR ( $\text{CDCl}_3$ , 100.5 MHz) spectrum of **17** in the indicated region.

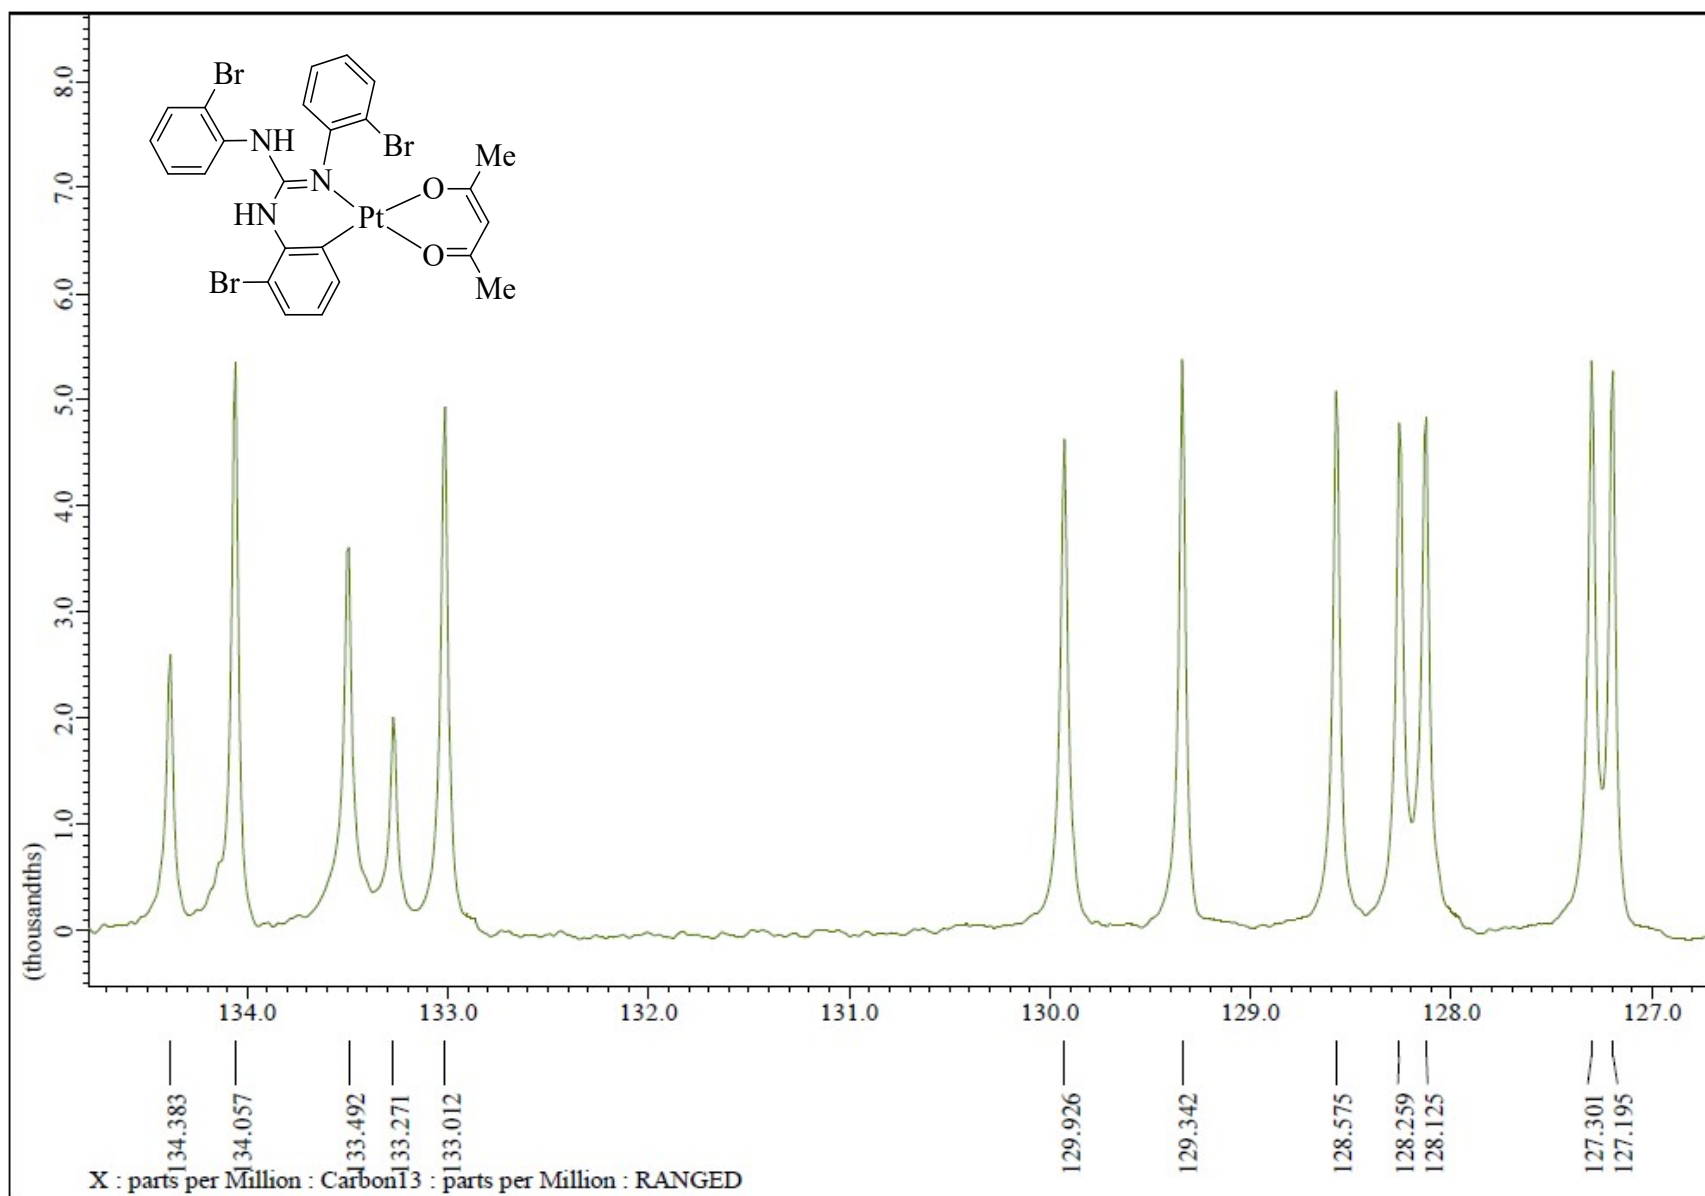

Fig. S160  $^{13}\text{C}\{^1\text{H}\}$  NMR ( $\text{CDCl}_3$ , 100.5 MHz) spectrum of **17** in the indicated region.

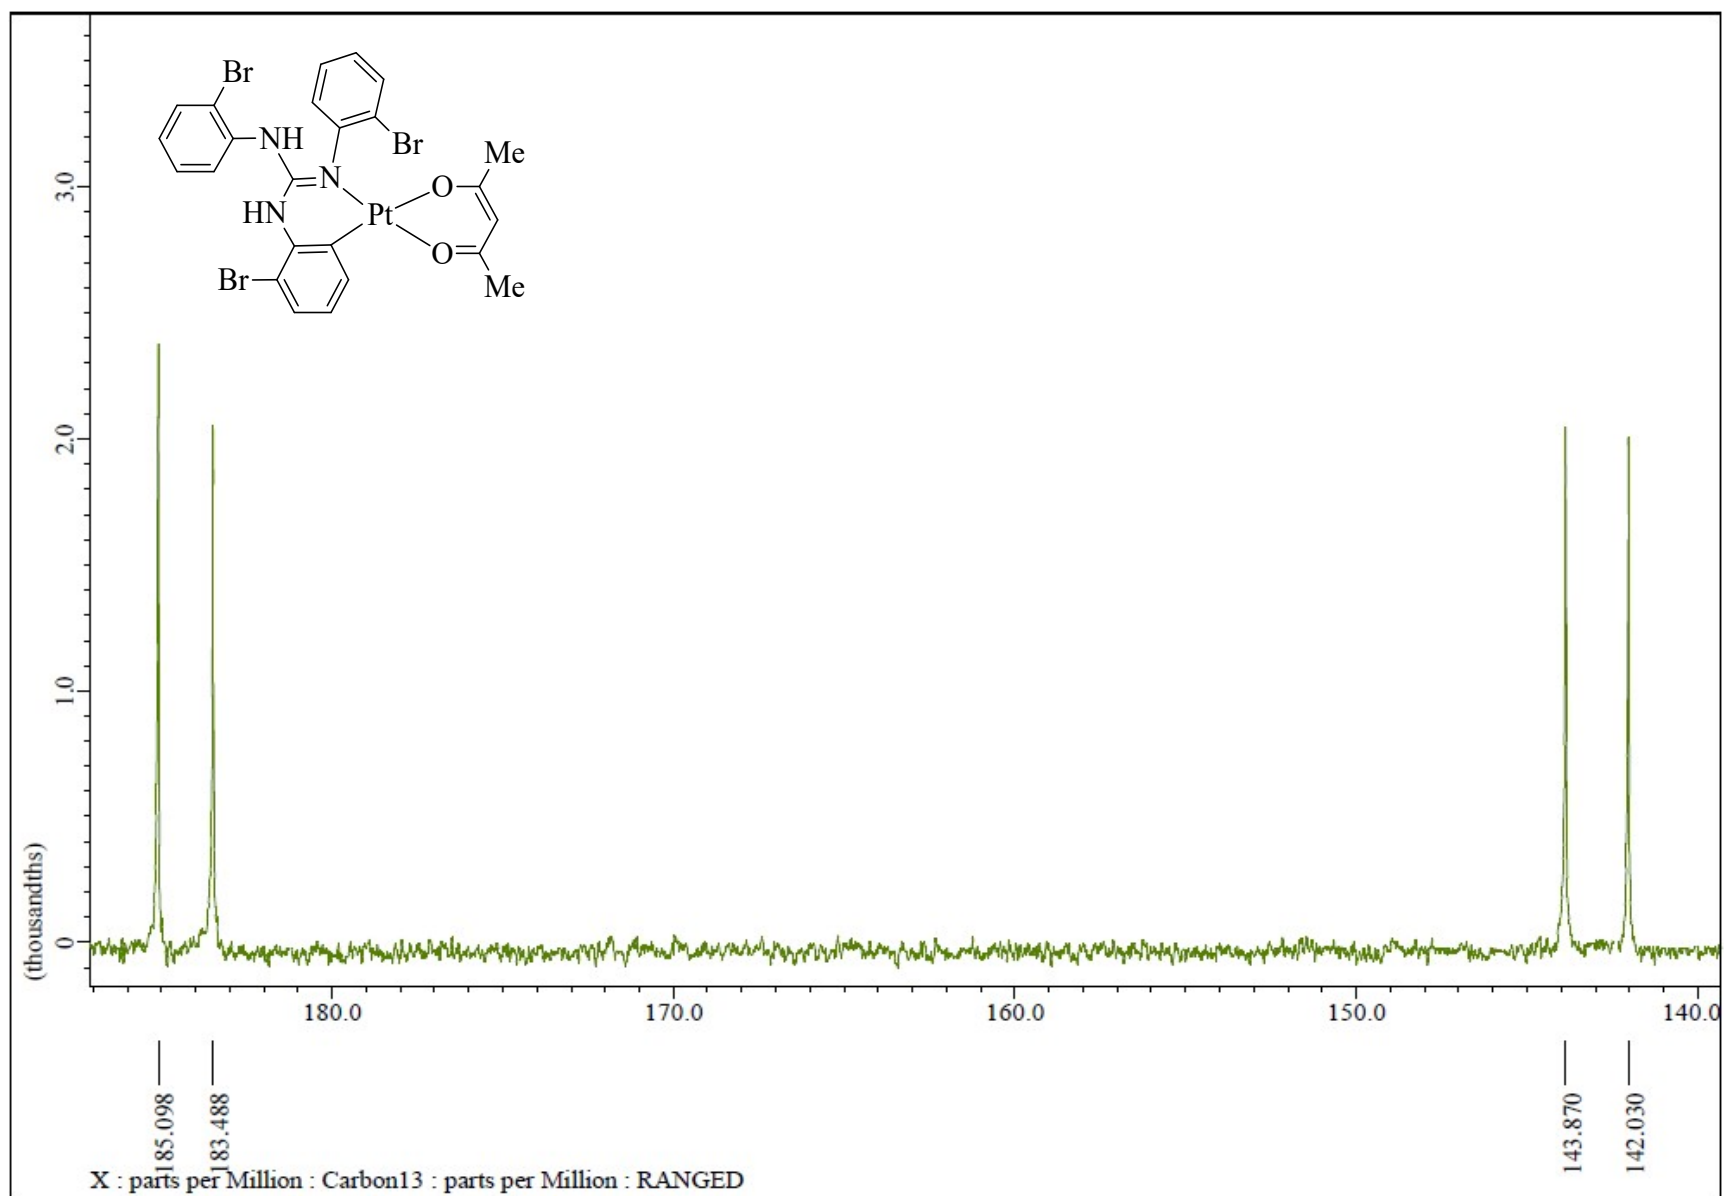

Fig. S161  $^{13}\text{C}\{^1\text{H}\}$  NMR ( $\text{CDCl}_3$ , 100.5 MHz) spectrum of **17** in the indicated region.

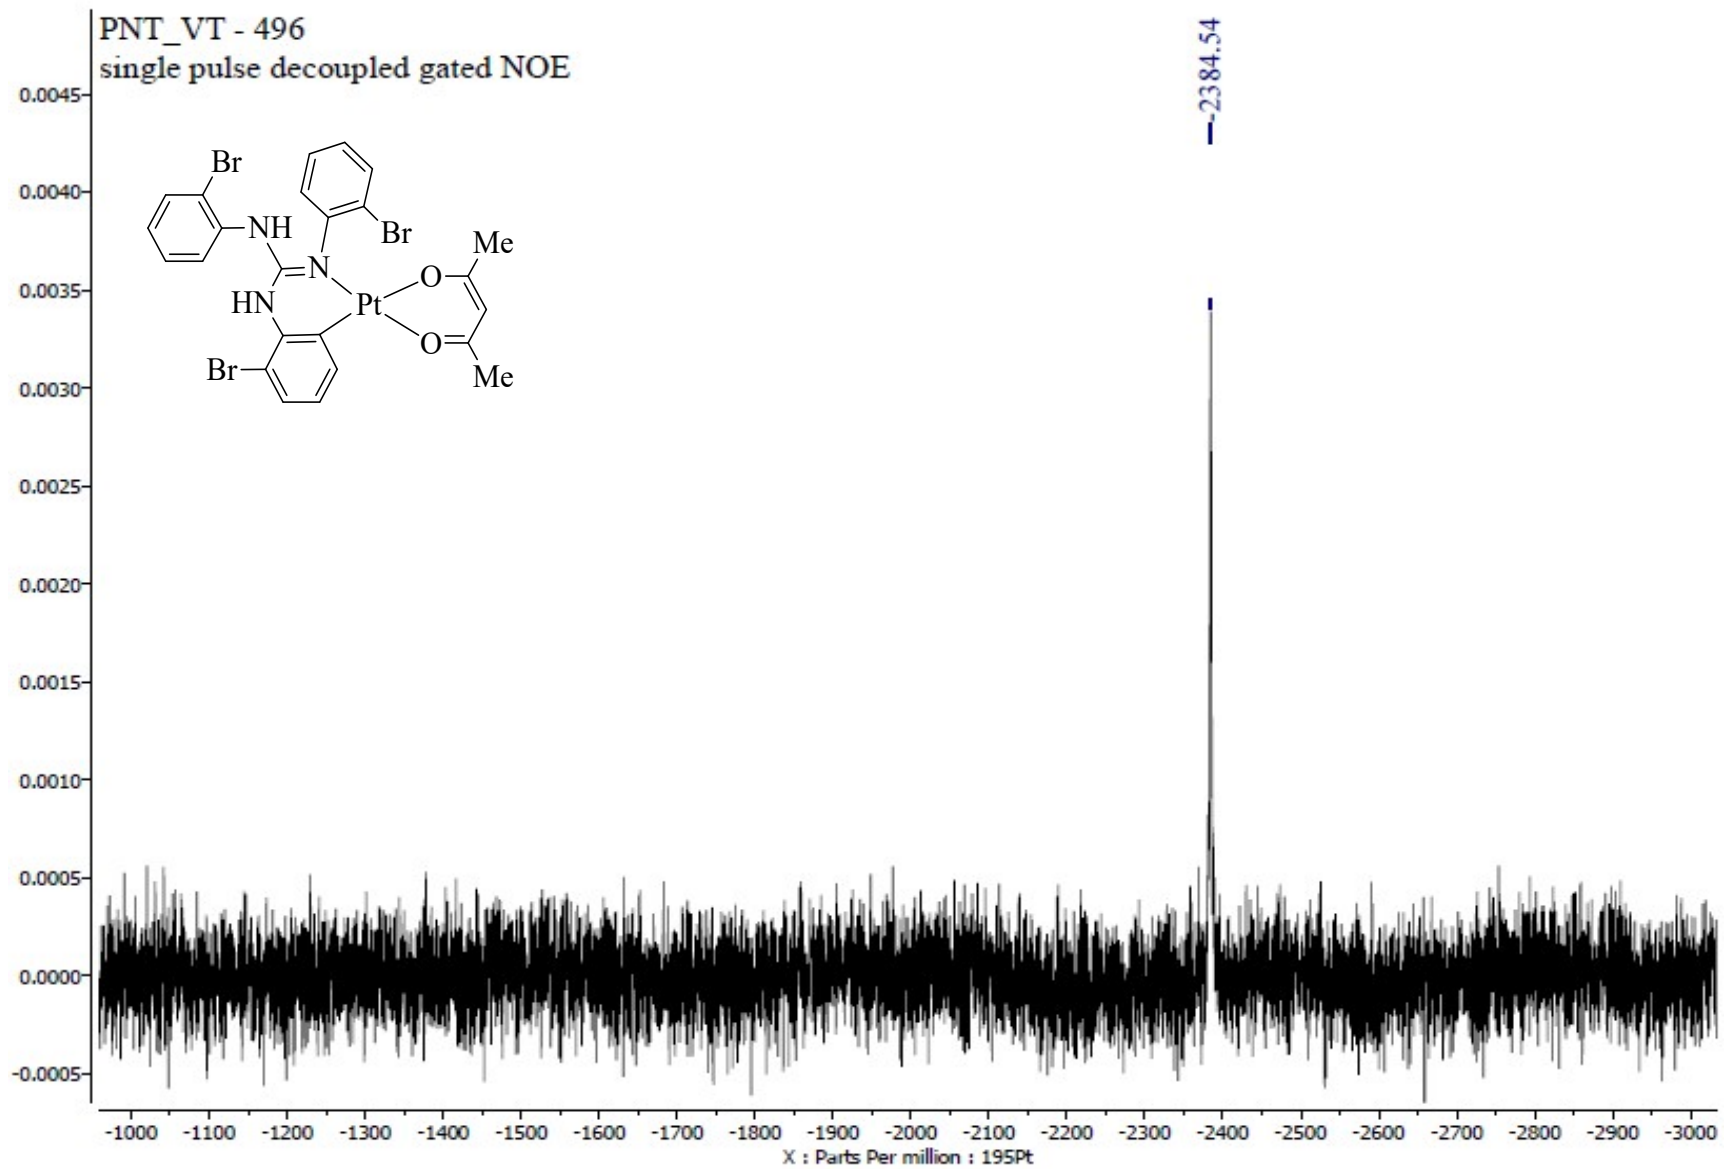

Fig. S162  $^{195}\text{Pt}\{^1\text{H}\}$  NMR ( $\text{CDCl}_3$ , 85.8 MHz) spectrum of 17.

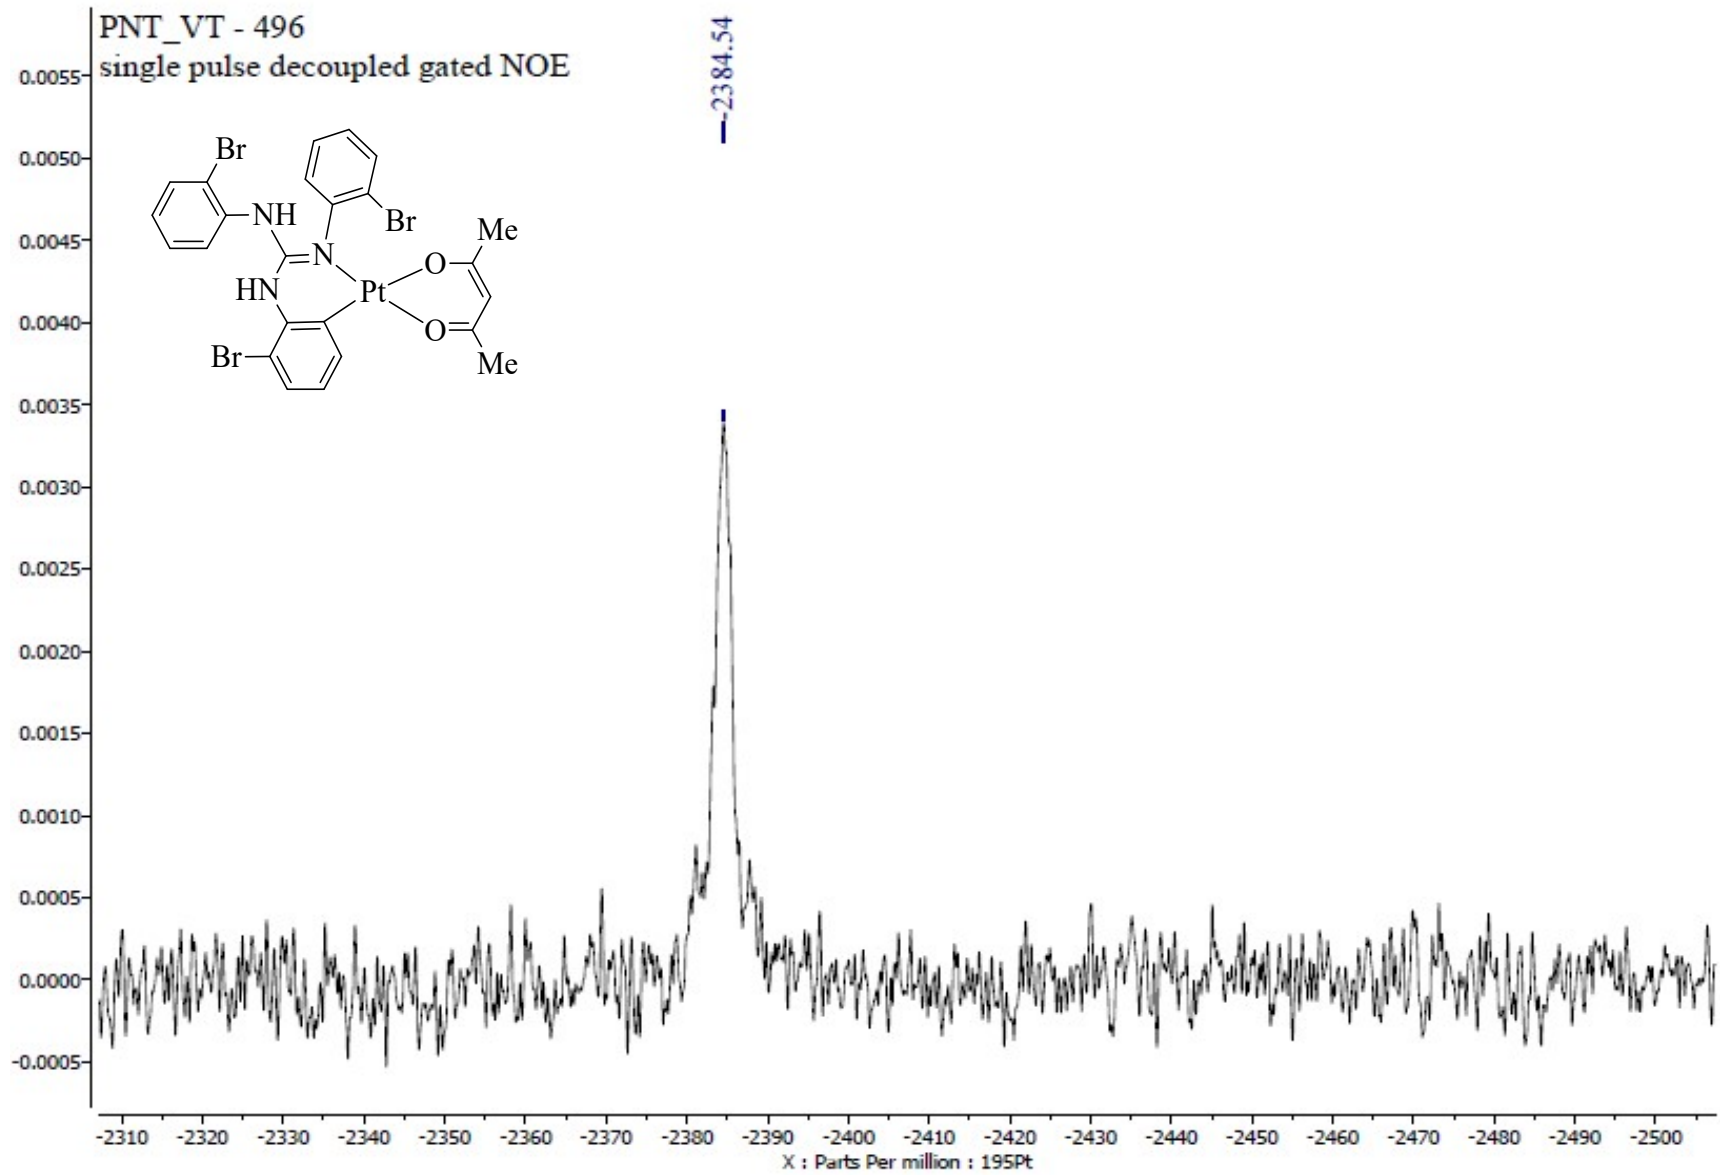

Fig. S163  $^{195}\text{Pt}\{^1\text{H}\}$  NMR ( $\text{CDCl}_3$ , 85.8 MHz) spectrum of **17** in the indicated region.

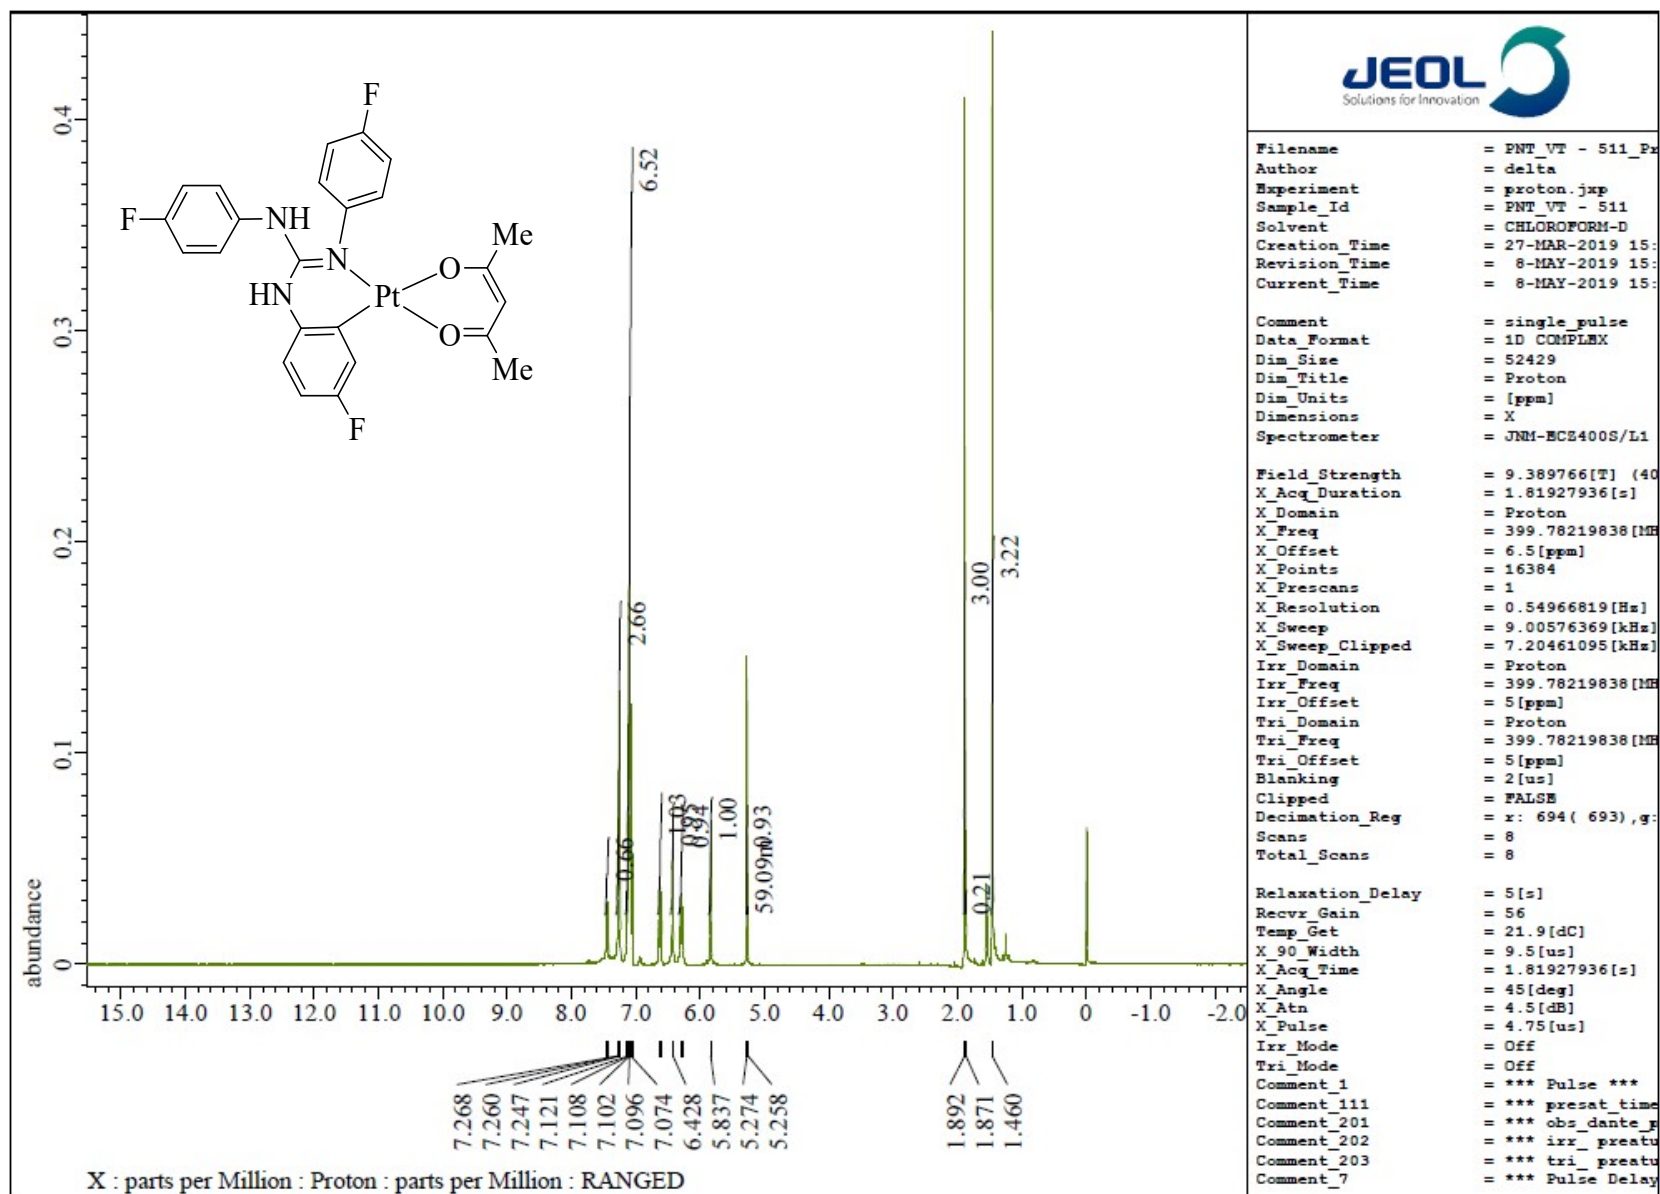

Fig. S164 <sup>1</sup>H NMR (CDCl<sub>3</sub>, 400 MHz) spectrum of 18.

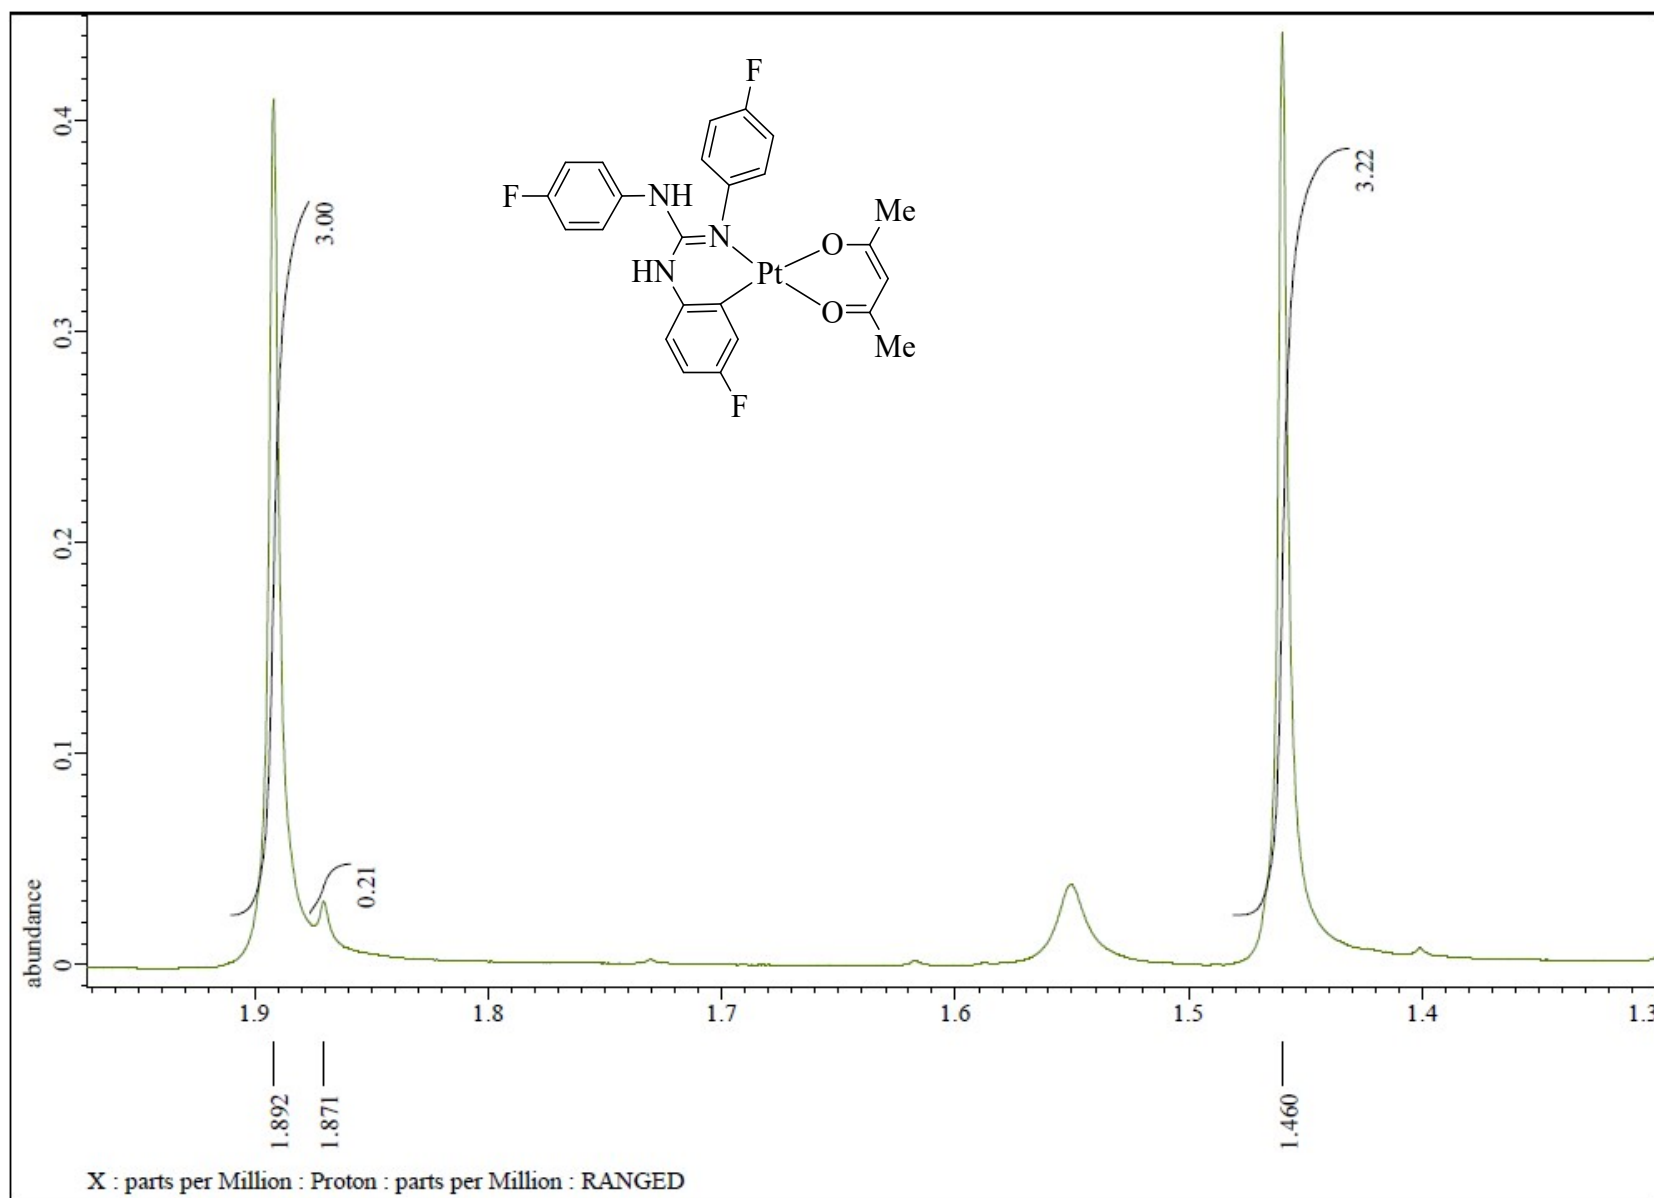

Fig. S165  $^1\text{H}$  NMR ( $\text{CDCl}_3$ , 400 MHz) spectrum of **18** in the indicated region.

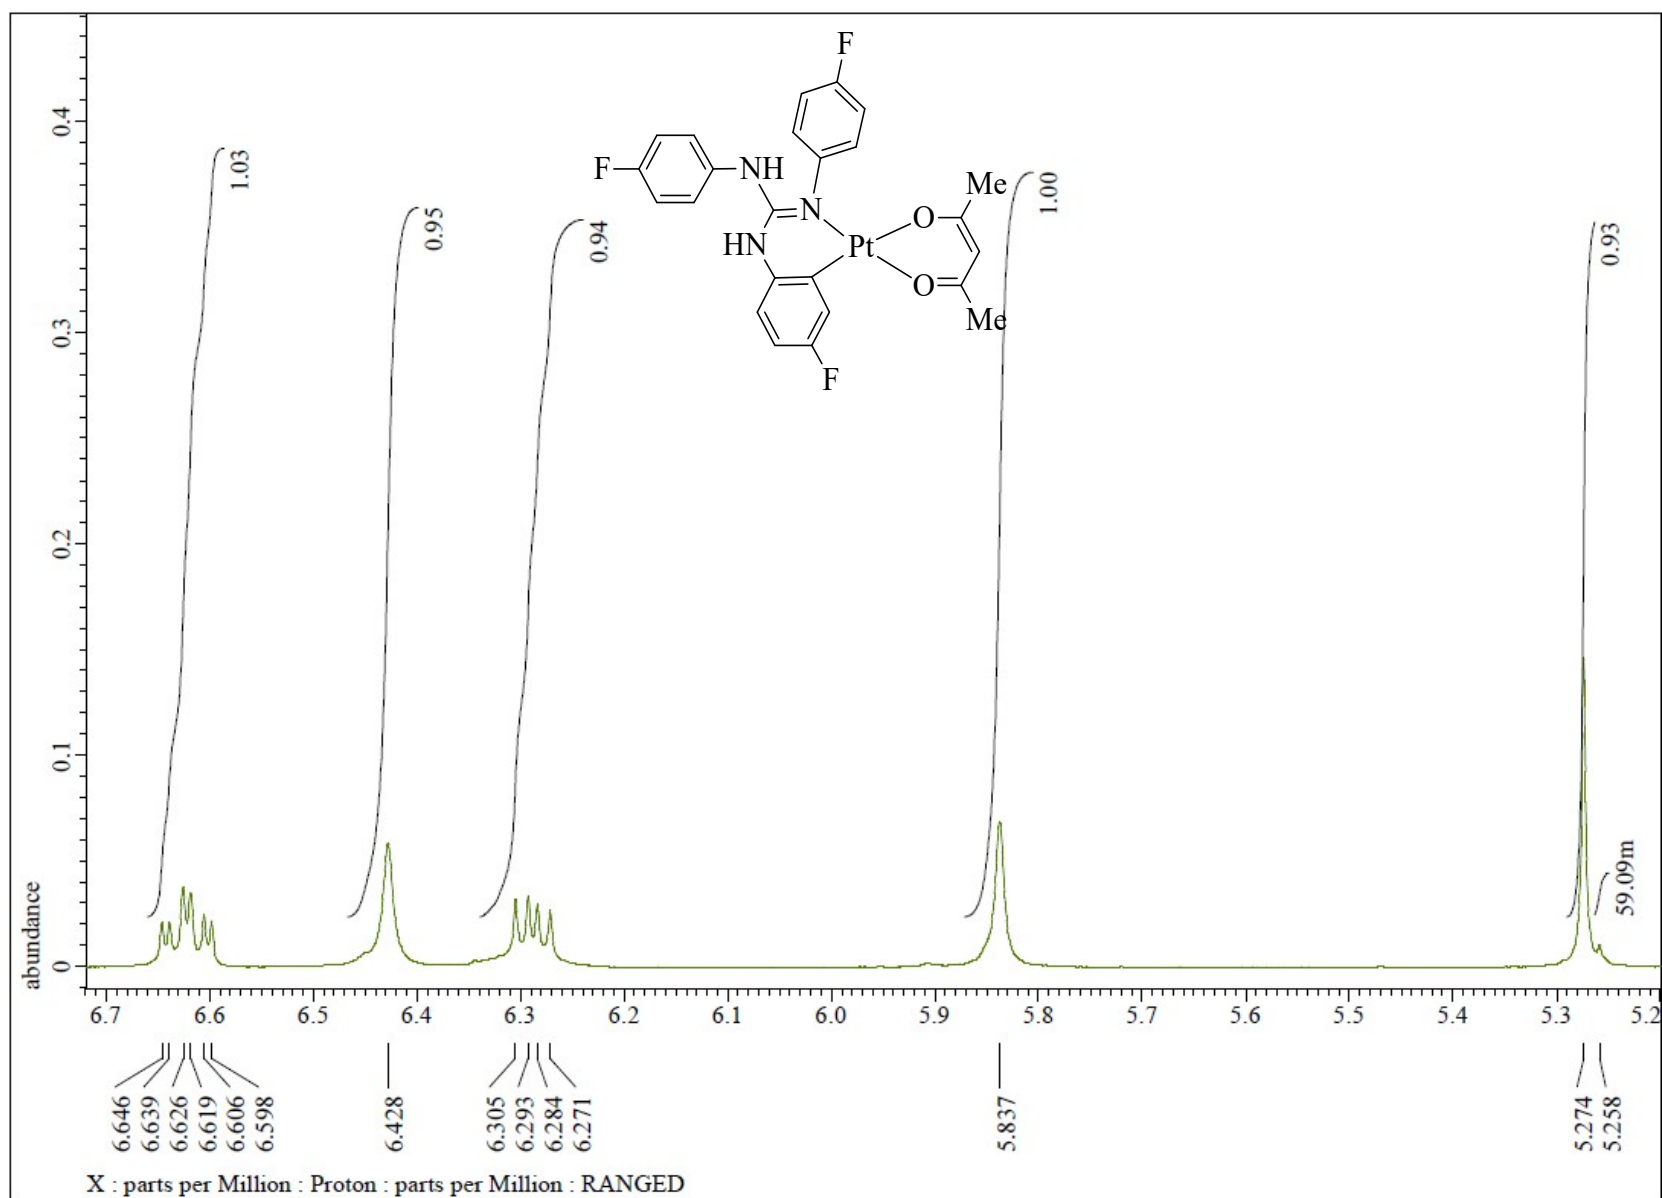

Fig. S166 <sup>1</sup>H NMR (CDCl<sub>3</sub>, 400 MHz) spectrum of **18** in the indicated region.



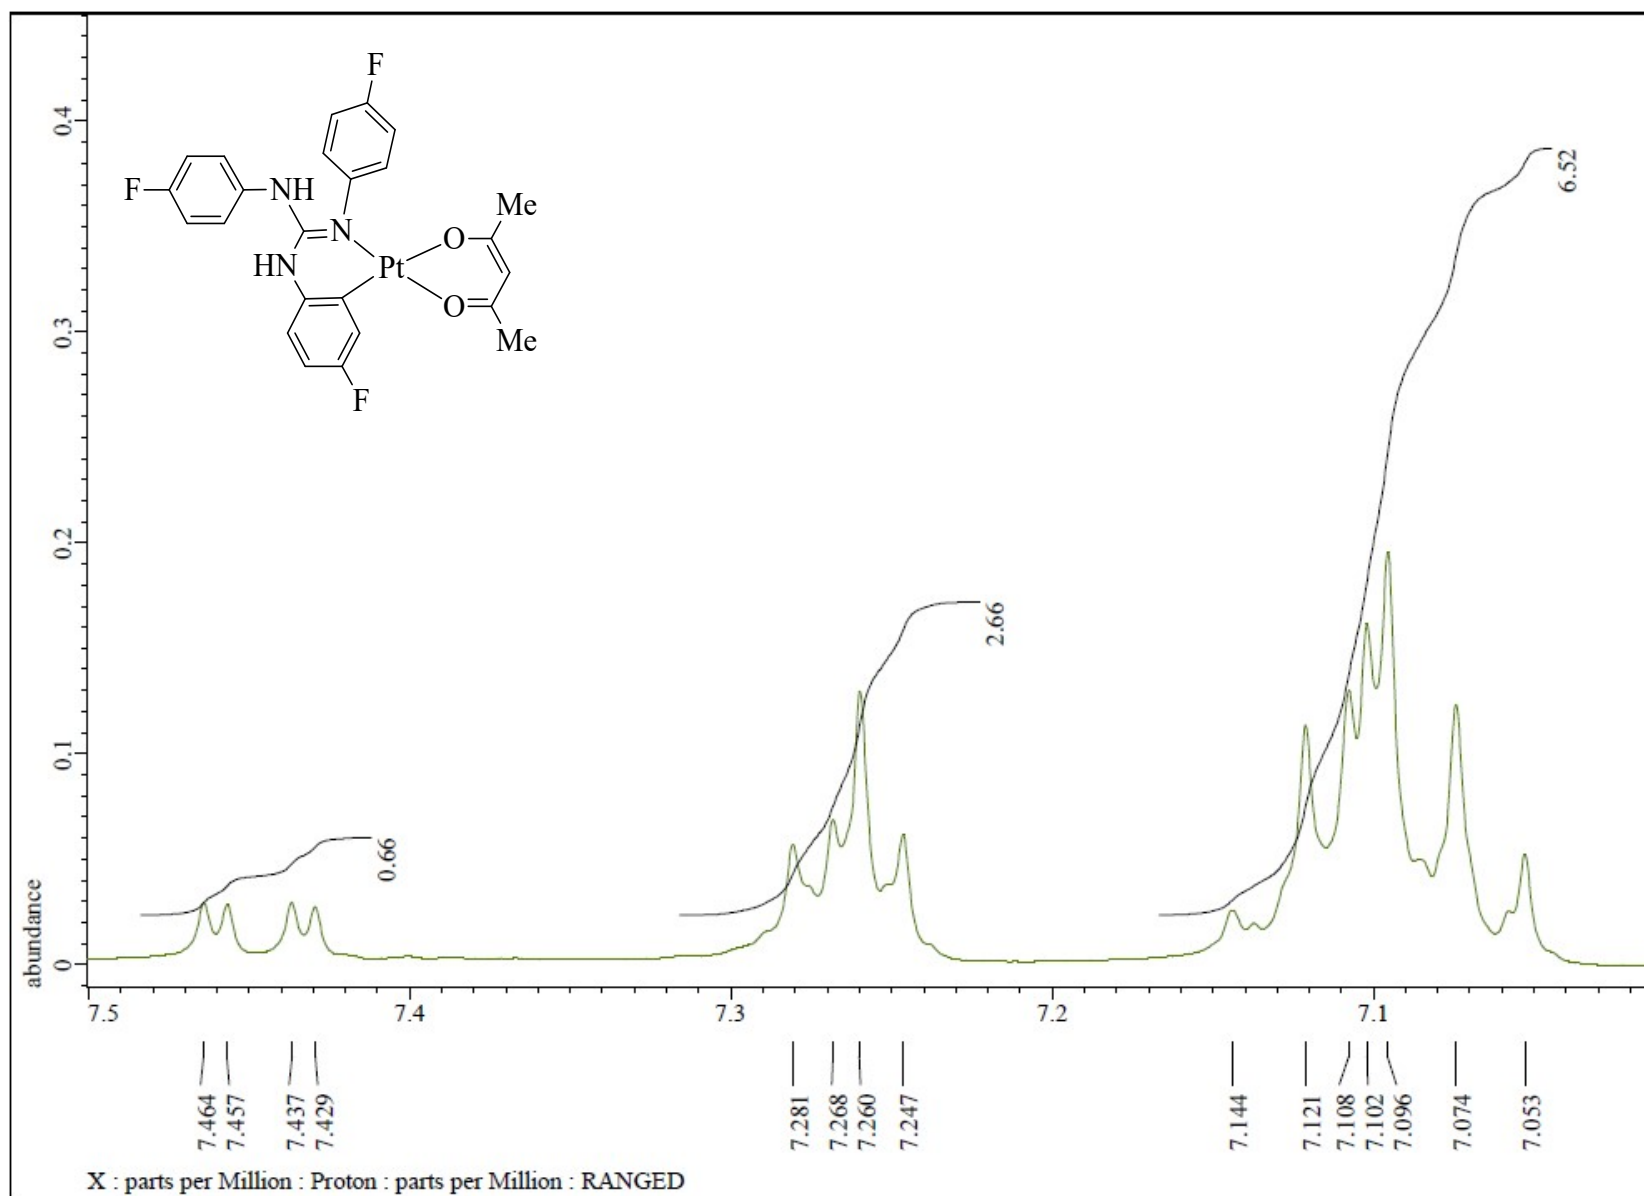

Fig. S167  $^1\text{H}$  NMR (CDCl<sub>3</sub>, 400 MHz) spectrum of **18** in the indicated region.

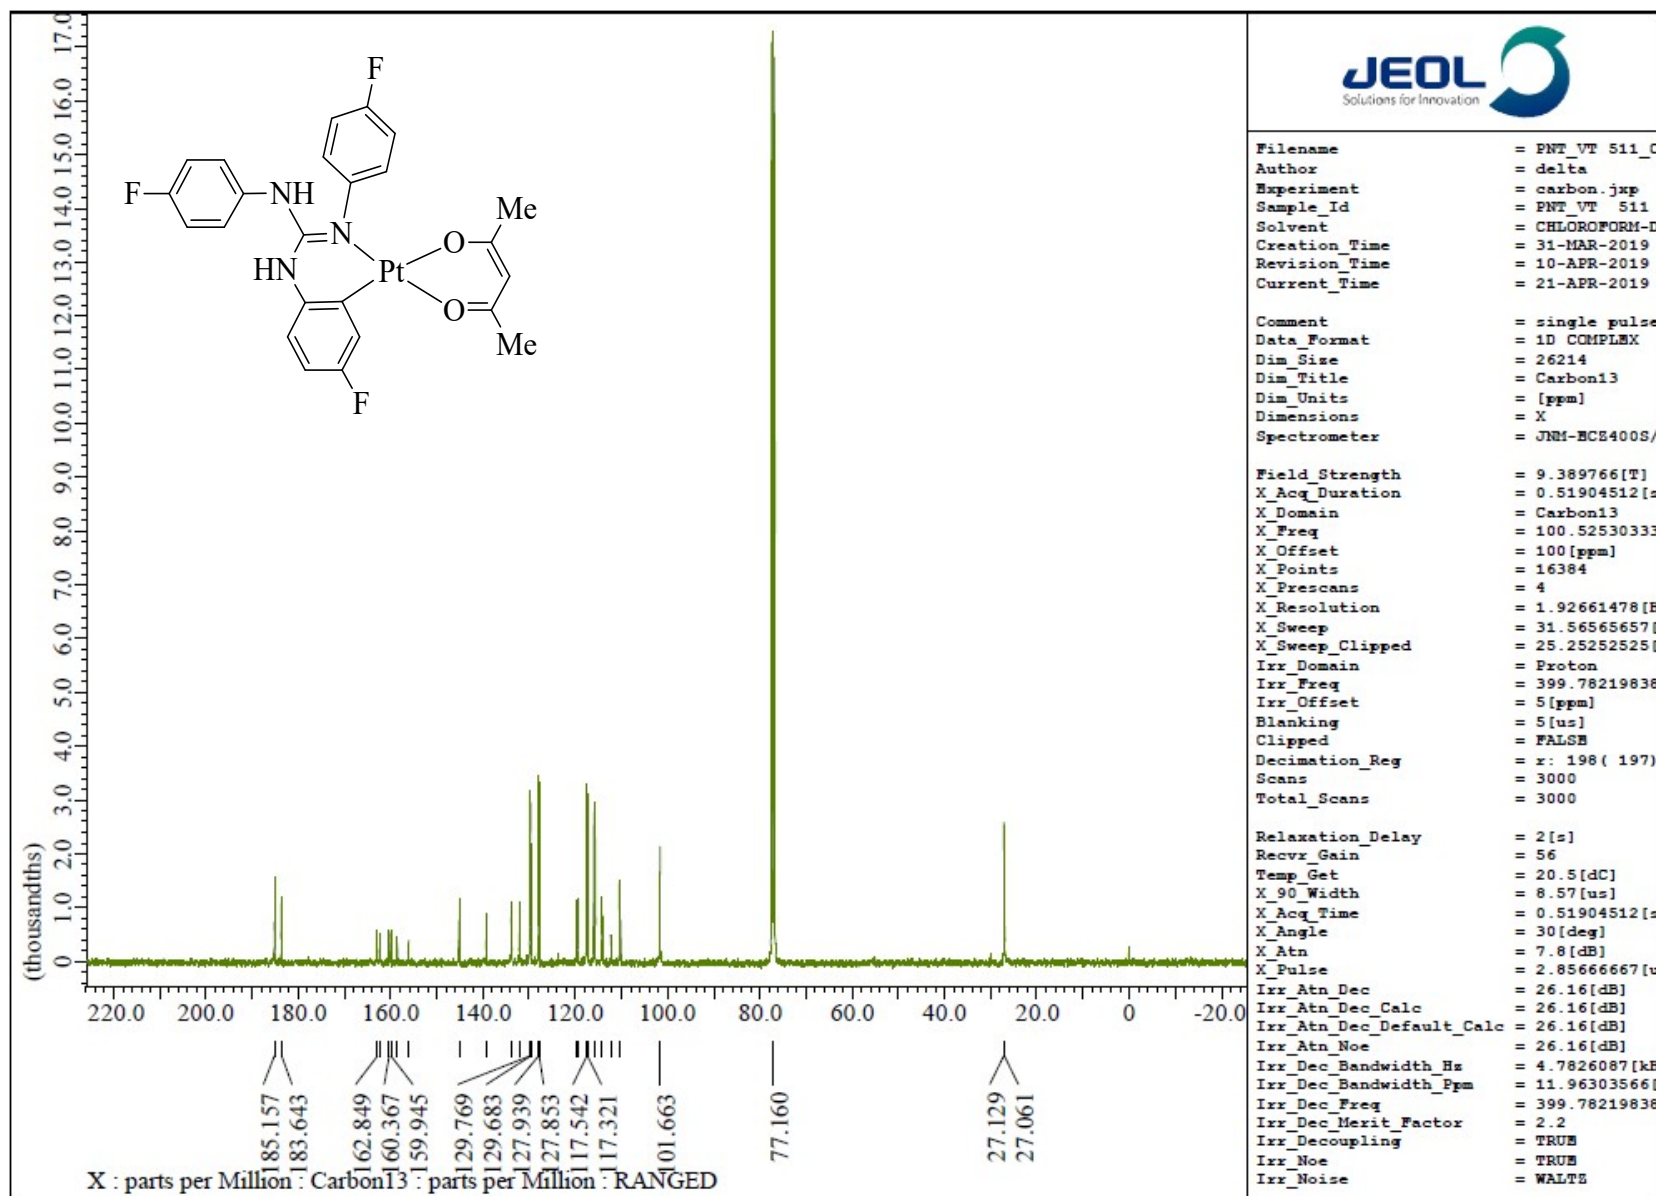

Fig. S168  $^{13}\text{C}\{^1\text{H}\}$  NMR ( $\text{CDCl}_3$ , 100.5 MHz) spectrum of 18.

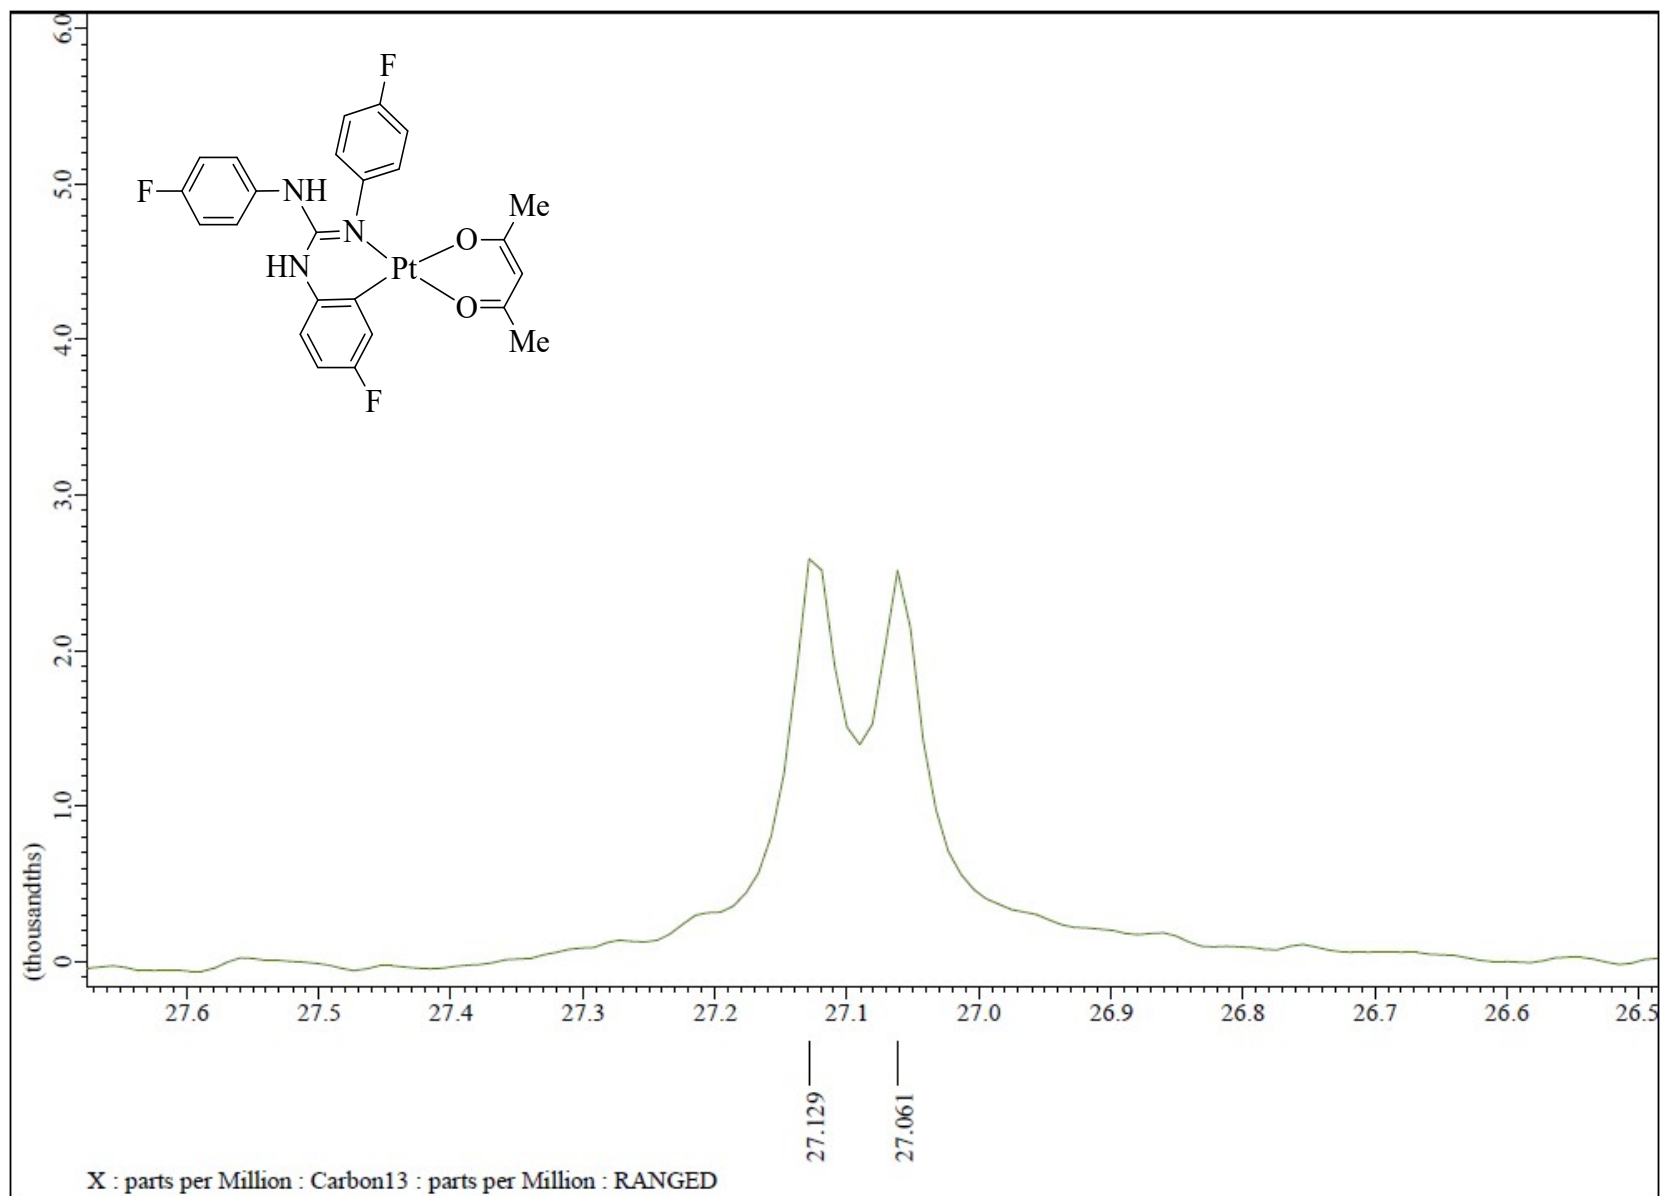

Fig. S169  $^{13}\text{C}\{^1\text{H}\}$  NMR ( $\text{CDCl}_3$ , 100.5 MHz) spectrum of **18** in the indicated region.

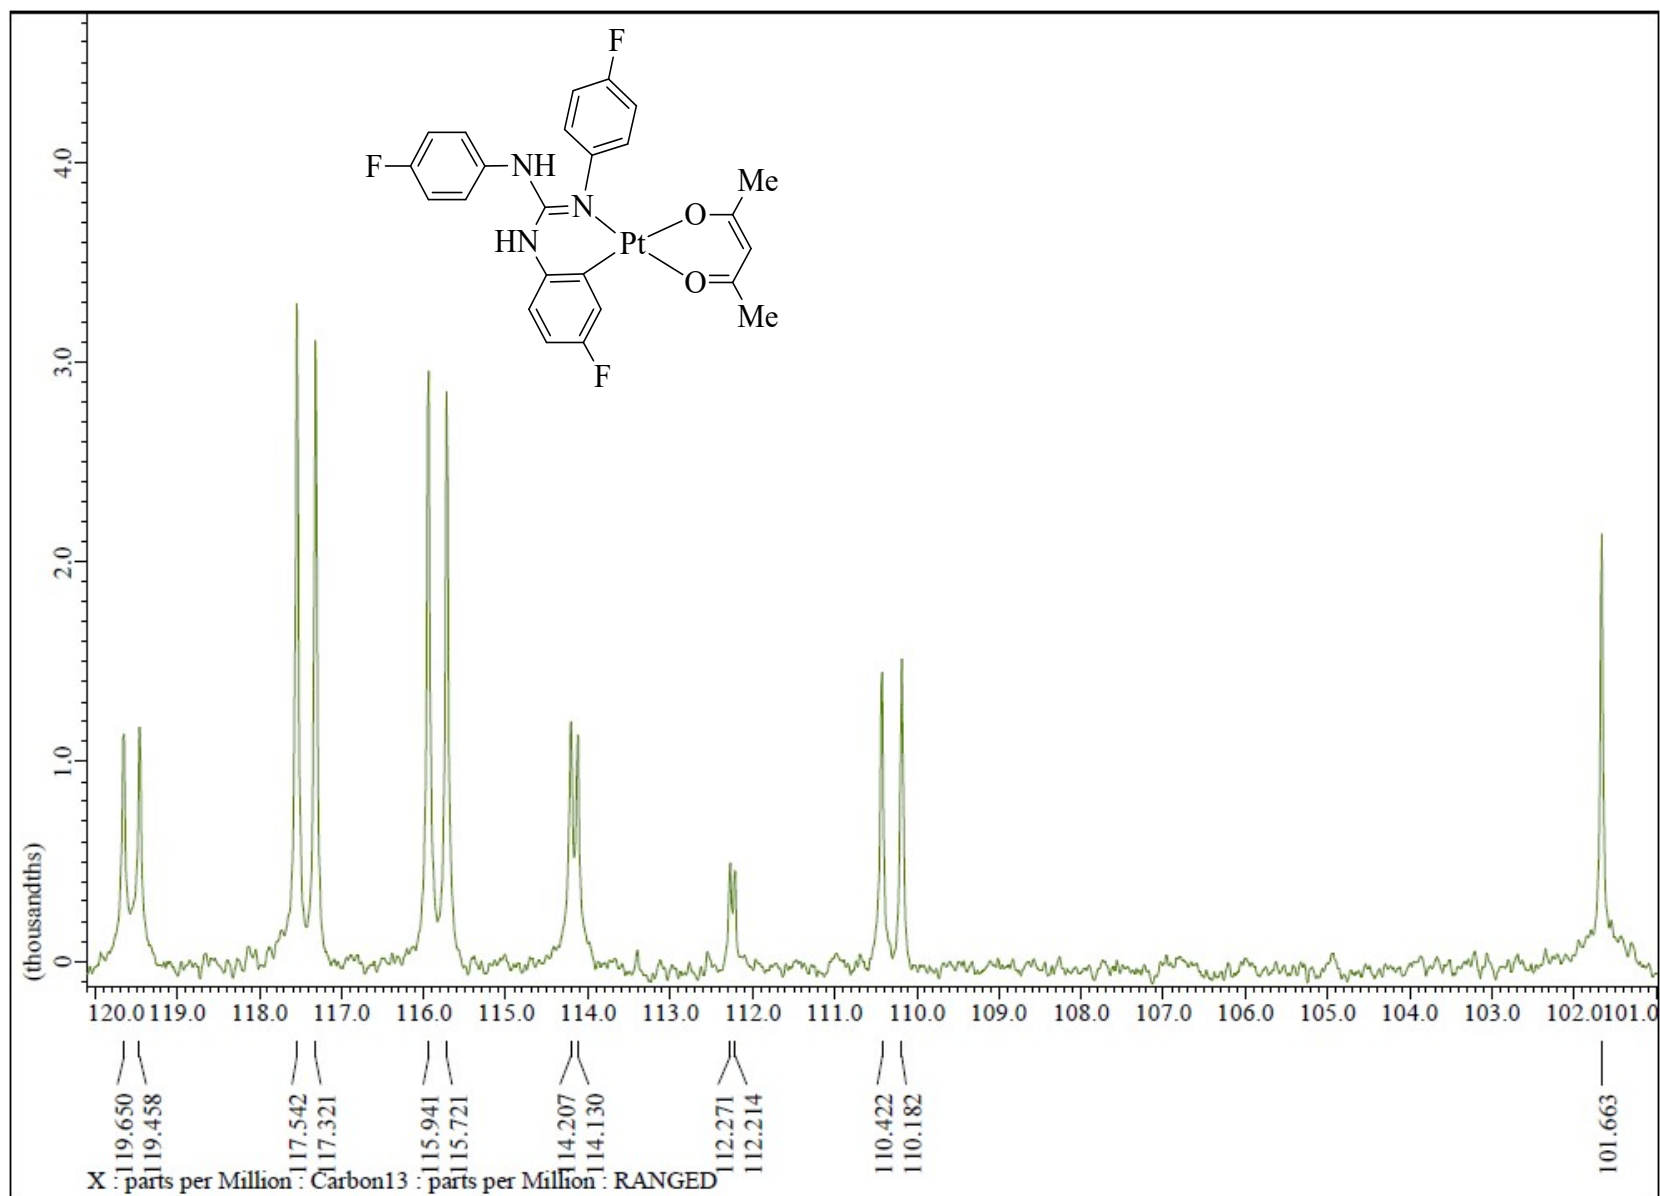

Fig. S170  $^{13}\text{C}\{^1\text{H}\}$  NMR ( $\text{CDCl}_3$ , 100.5 MHz) spectrum of **18** in the indicated region.

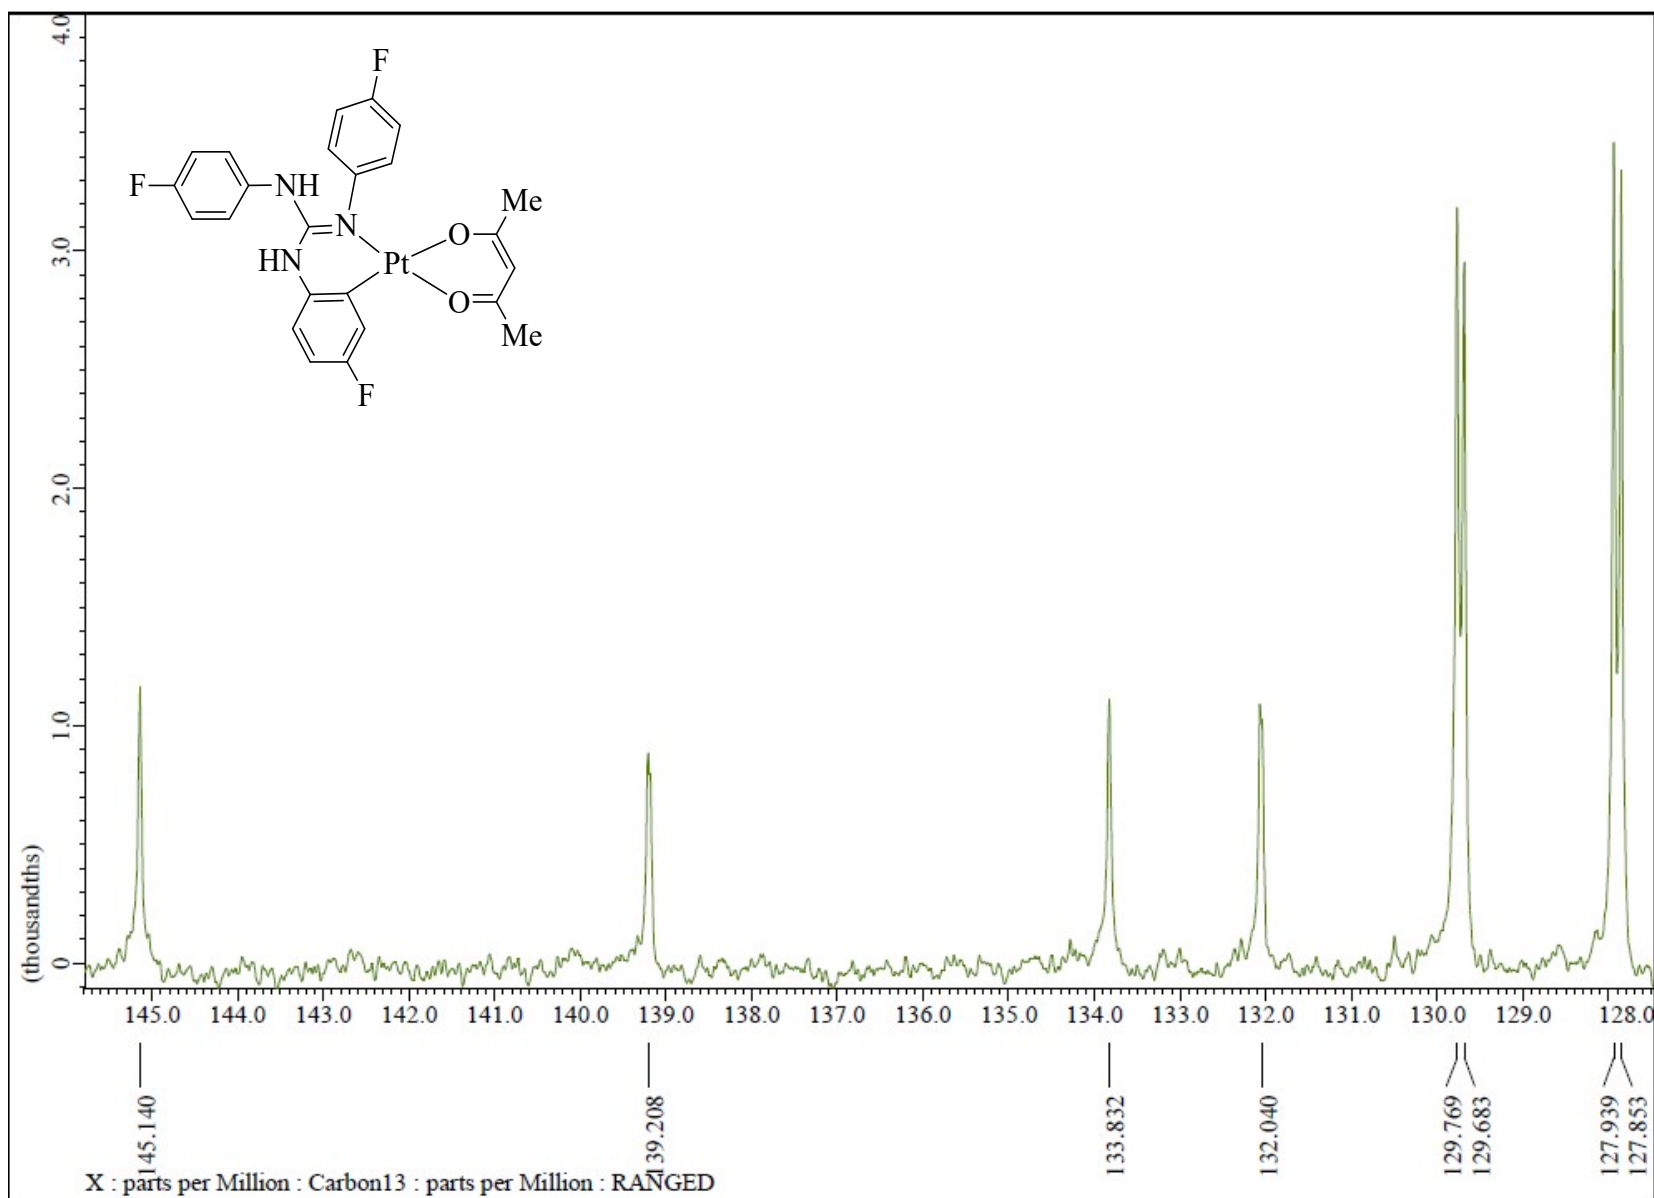

Fig. S171  $^{13}\text{C}\{^1\text{H}\}$  NMR ( $\text{CDCl}_3$ , 100.5 MHz) spectrum of **18** in the indicated region.

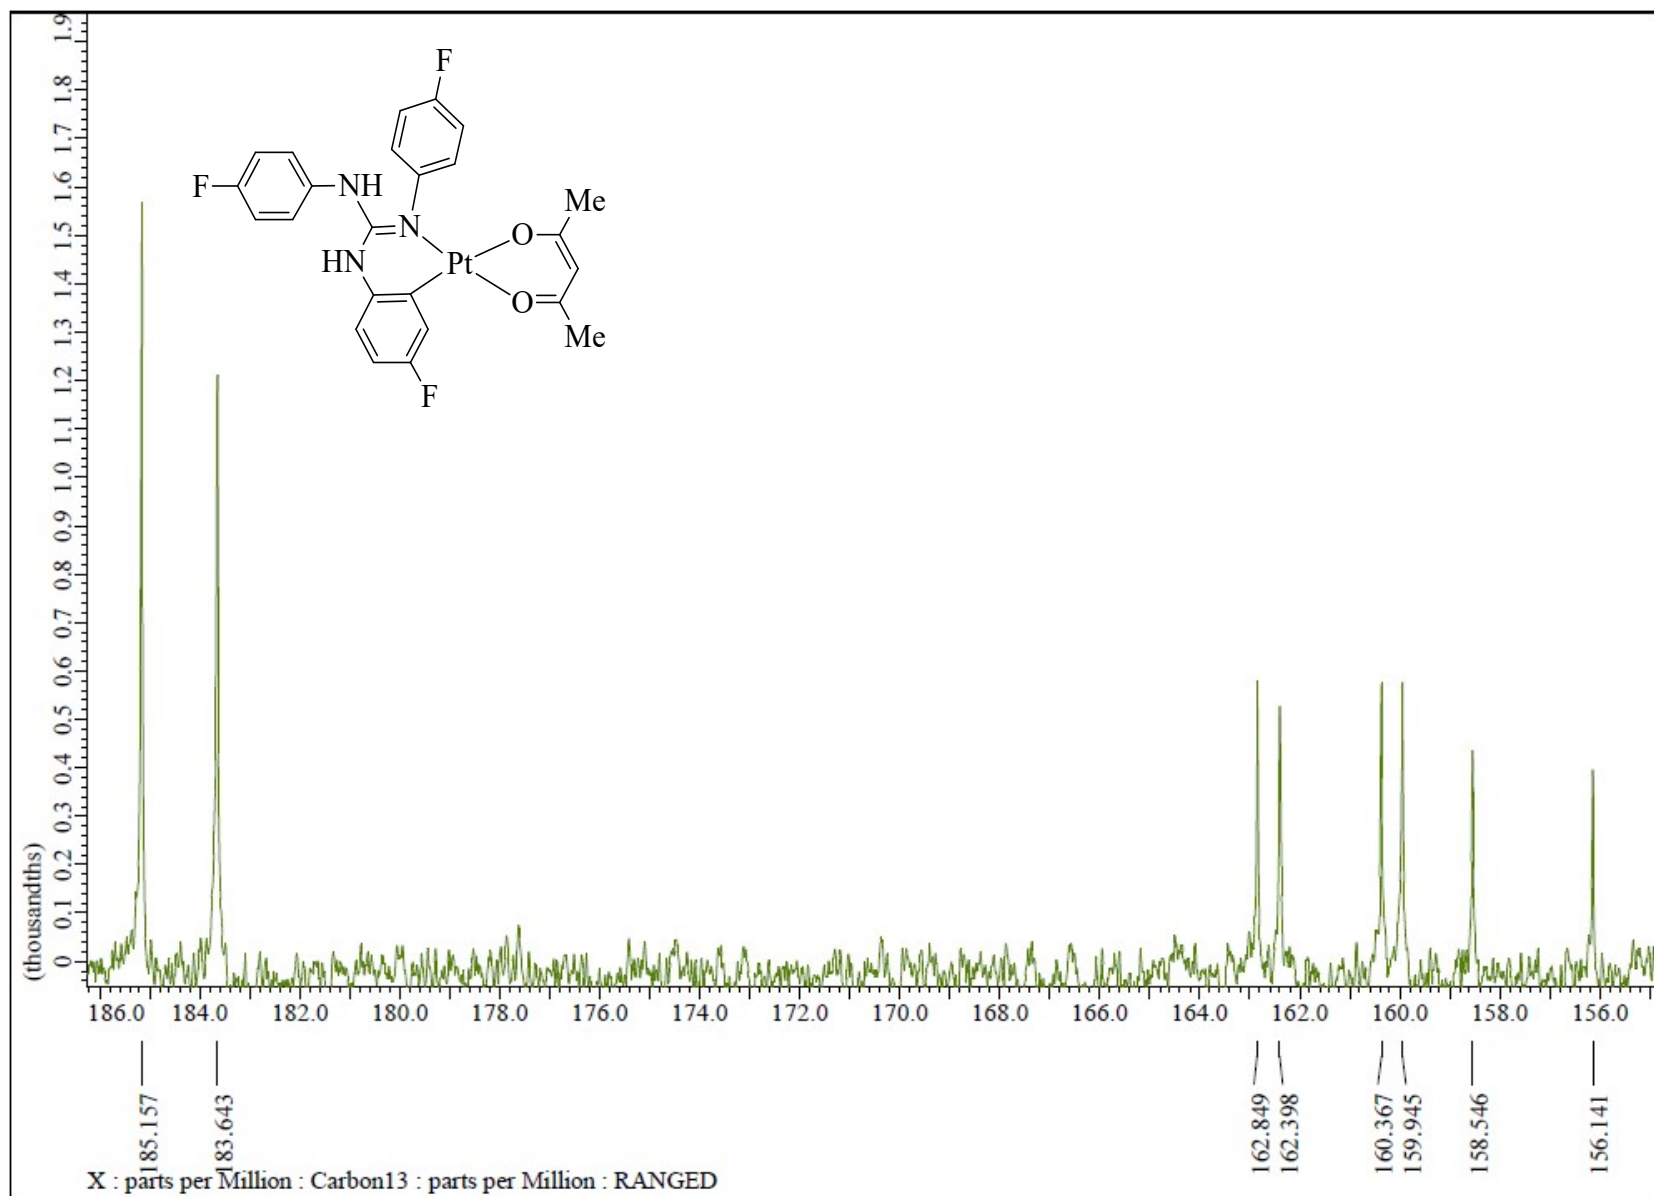

Fig. S172  $^{13}\text{C}\{^1\text{H}\}$  NMR ( $\text{CDCl}_3$ , 100.5 MHz) spectrum of **18** in the indicated region.

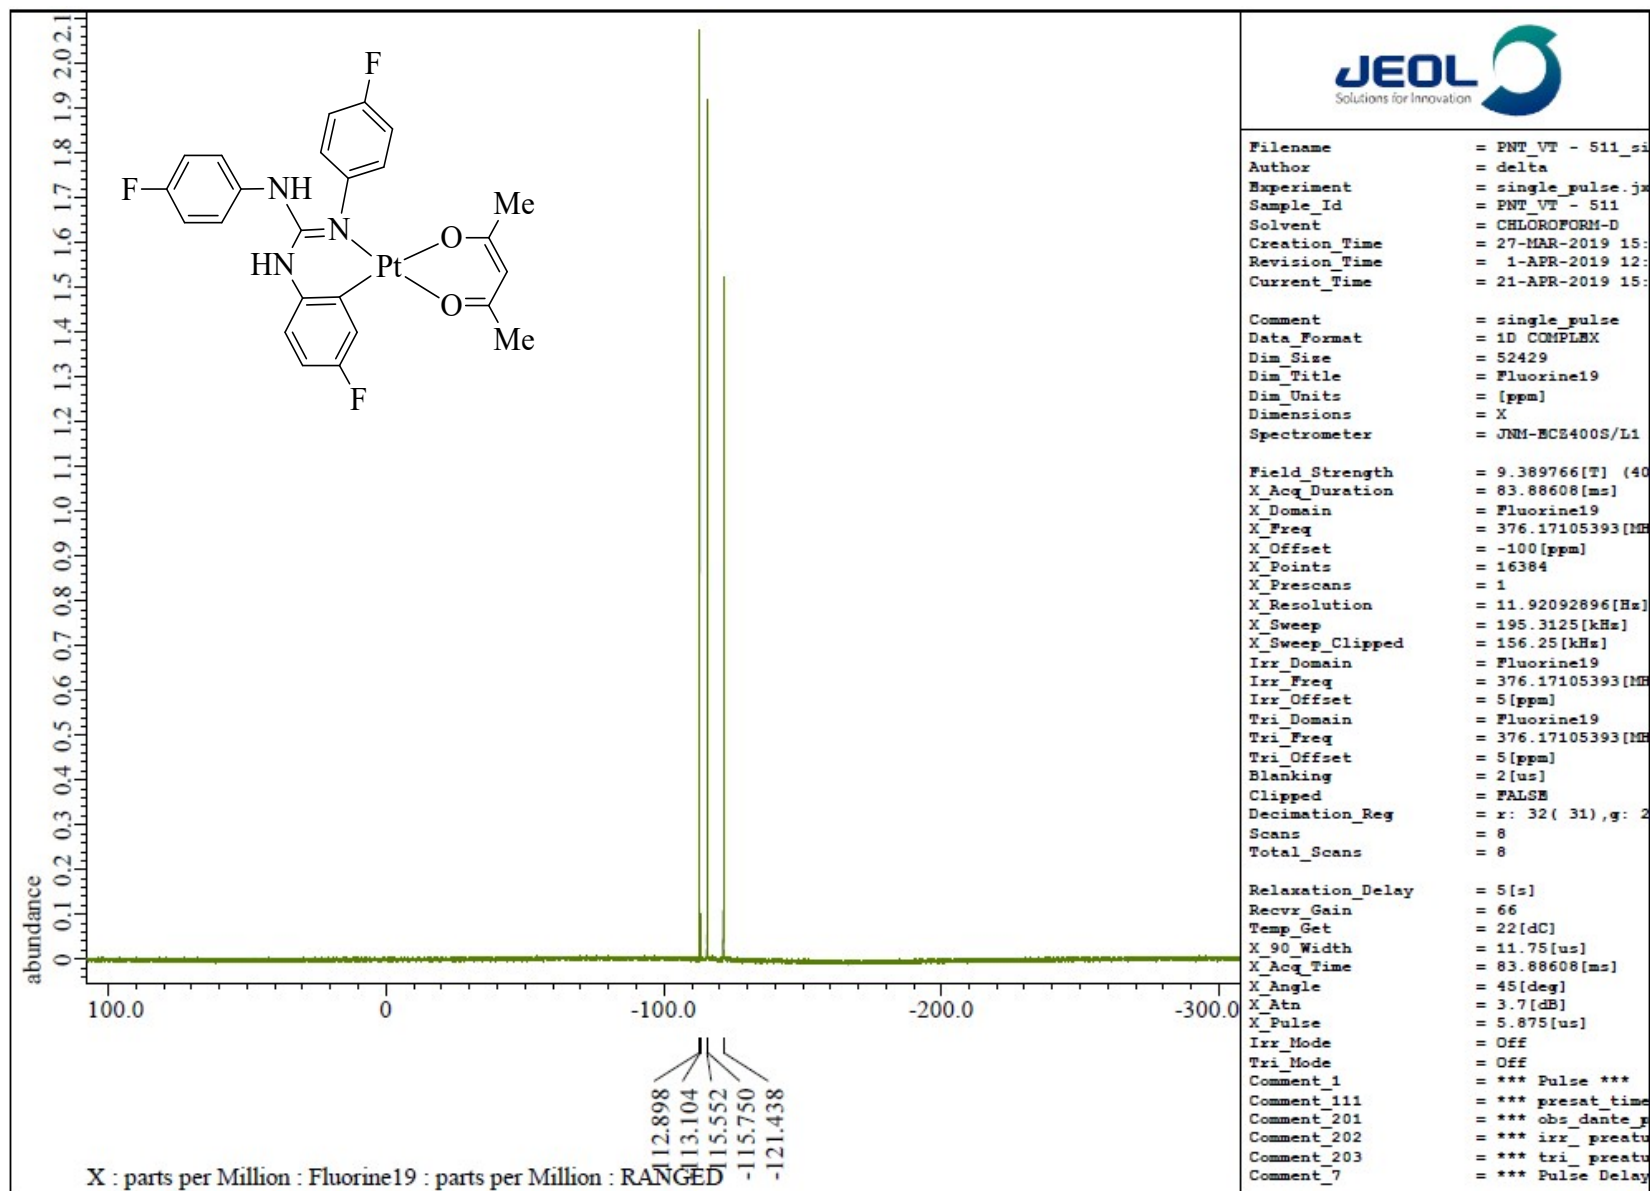

Fig. S173  $^{19}\text{F}$   $\{^1\text{H}\}$  NMR (CDCl<sub>3</sub>, 376.31 MHz) spectrum of 18.

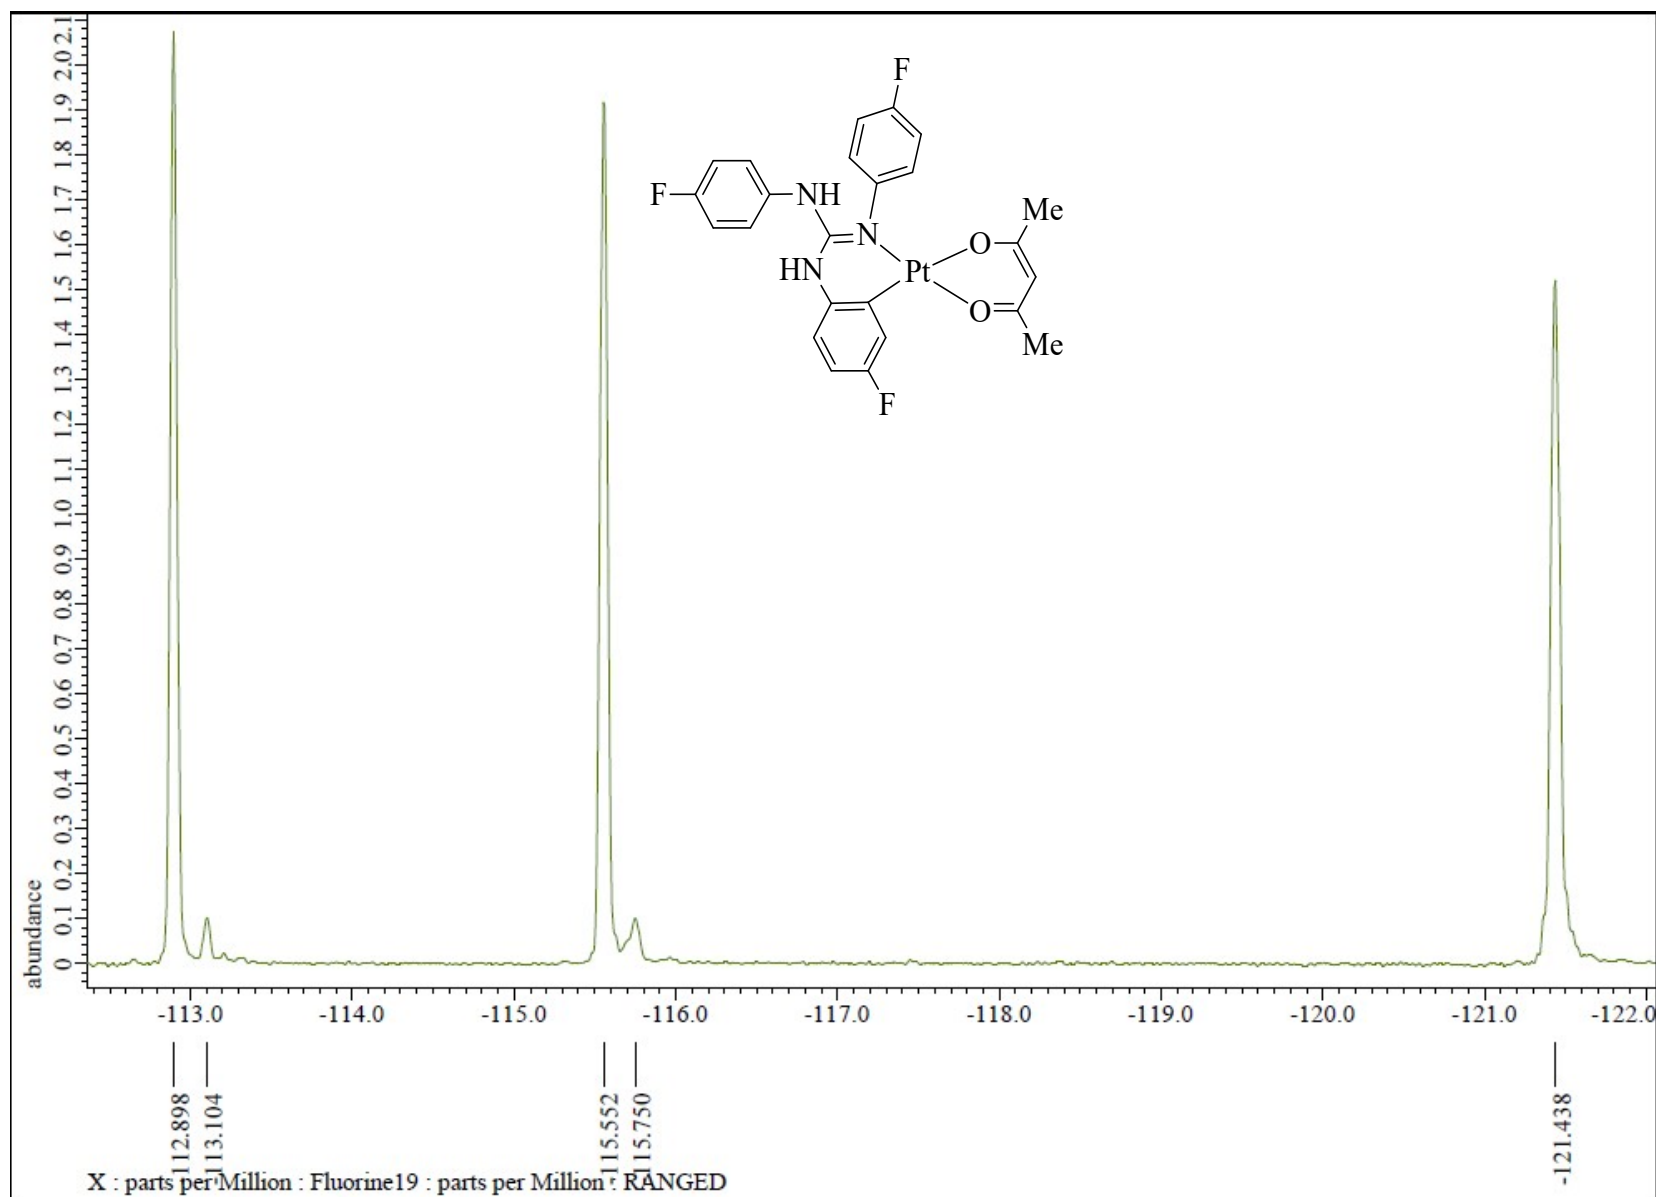

Fig. S174  $^{19}\text{F}$   $\{^1\text{H}\}$  NMR ( $\text{CDCl}_3$ , 376.31 MHz) spectrum of **18** in the indicated region.



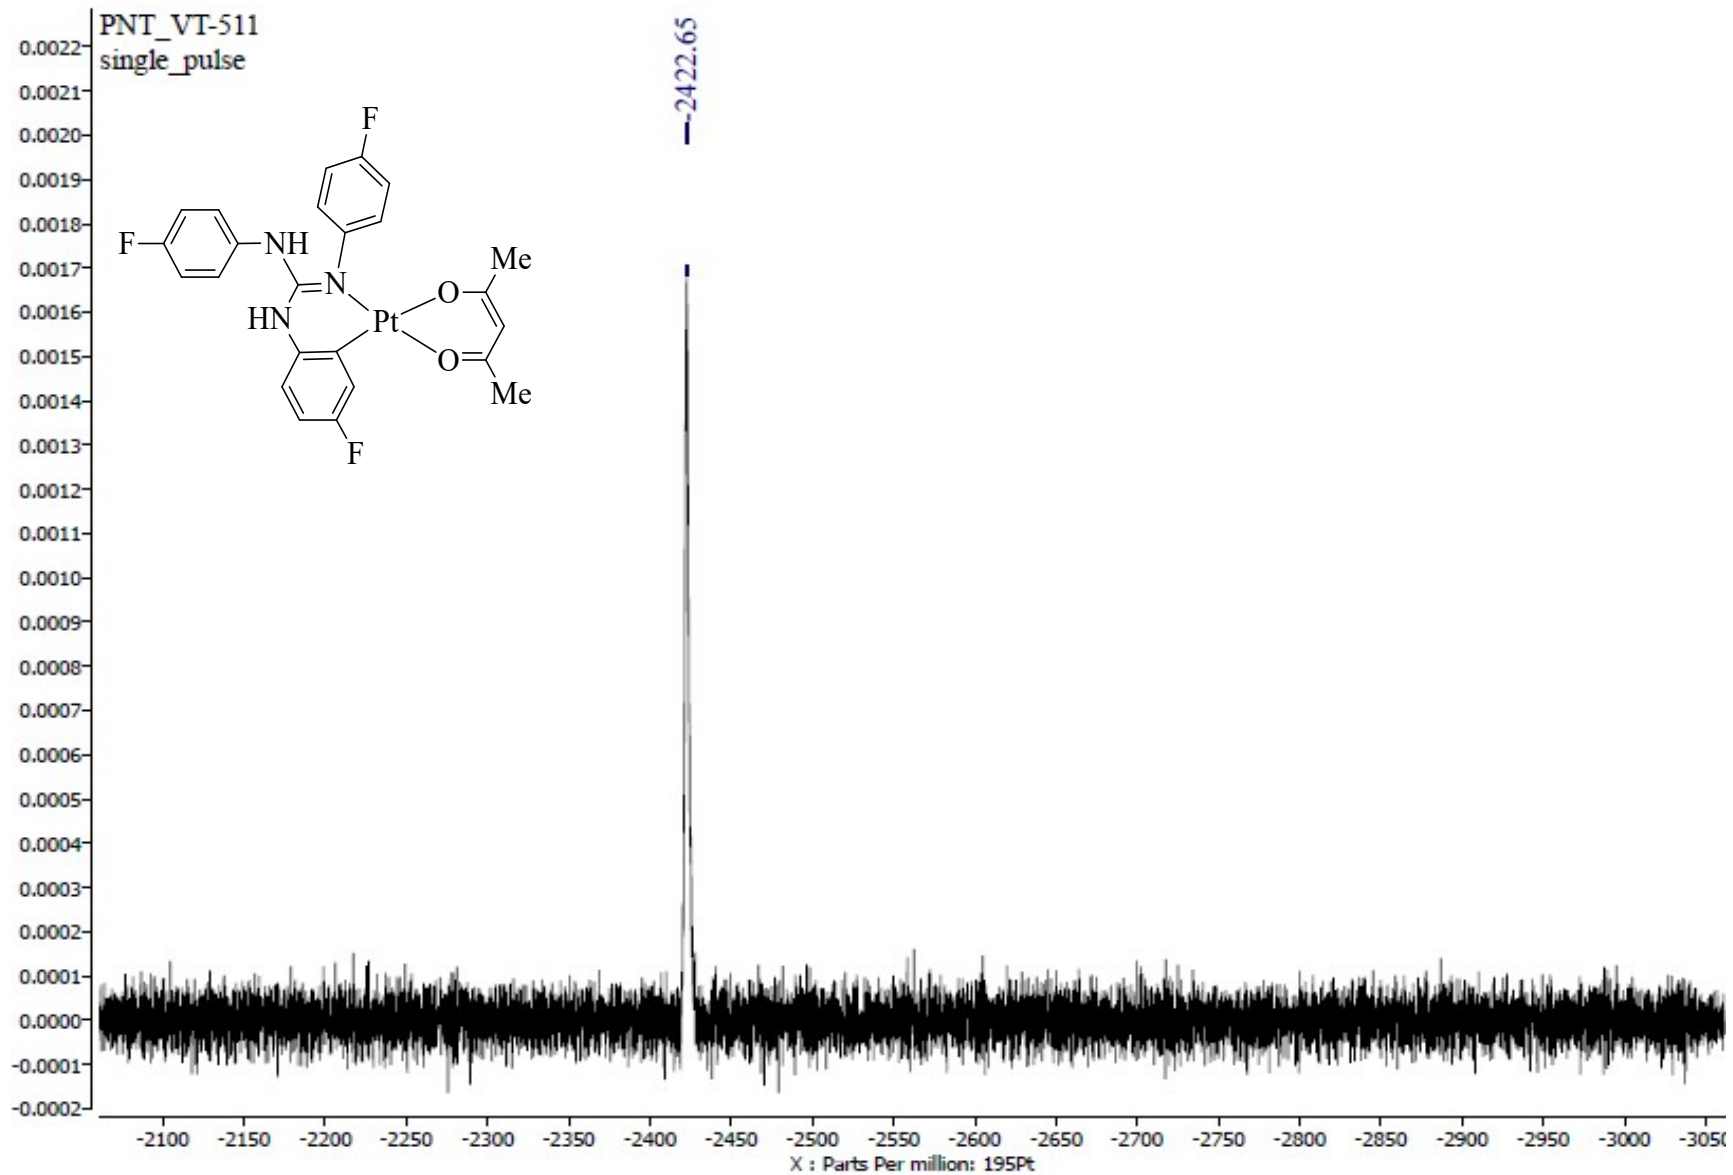

Fig. S175  $^{195}\text{Pt}\{^1\text{H}\}$  NMR ( $\text{CDCl}_3$ , 85.8 MHz) spectrum of **18**.

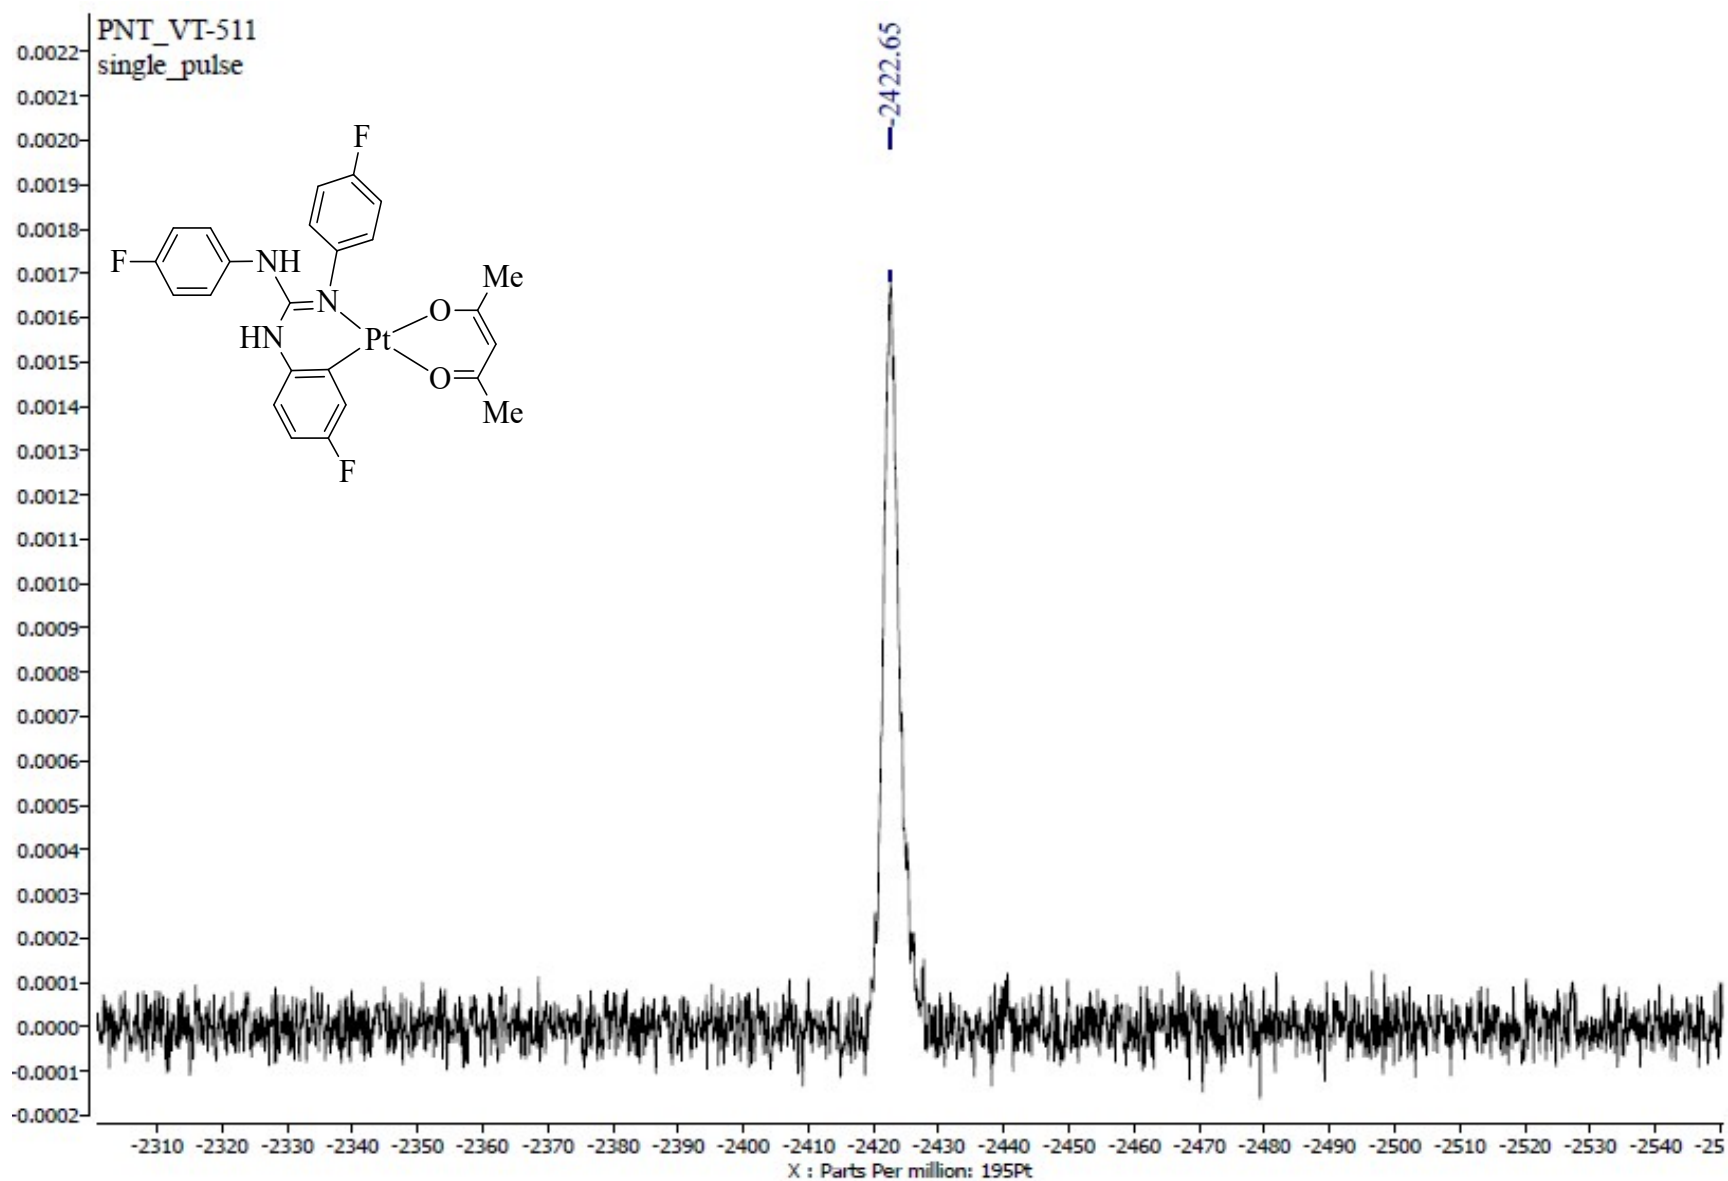

Fig. S176  $^{195}\text{Pt}\{^1\text{H}\}$  NMR ( $\text{CDCl}_3$ , 85.8 MHz) spectrum of **18** in the indicated region.

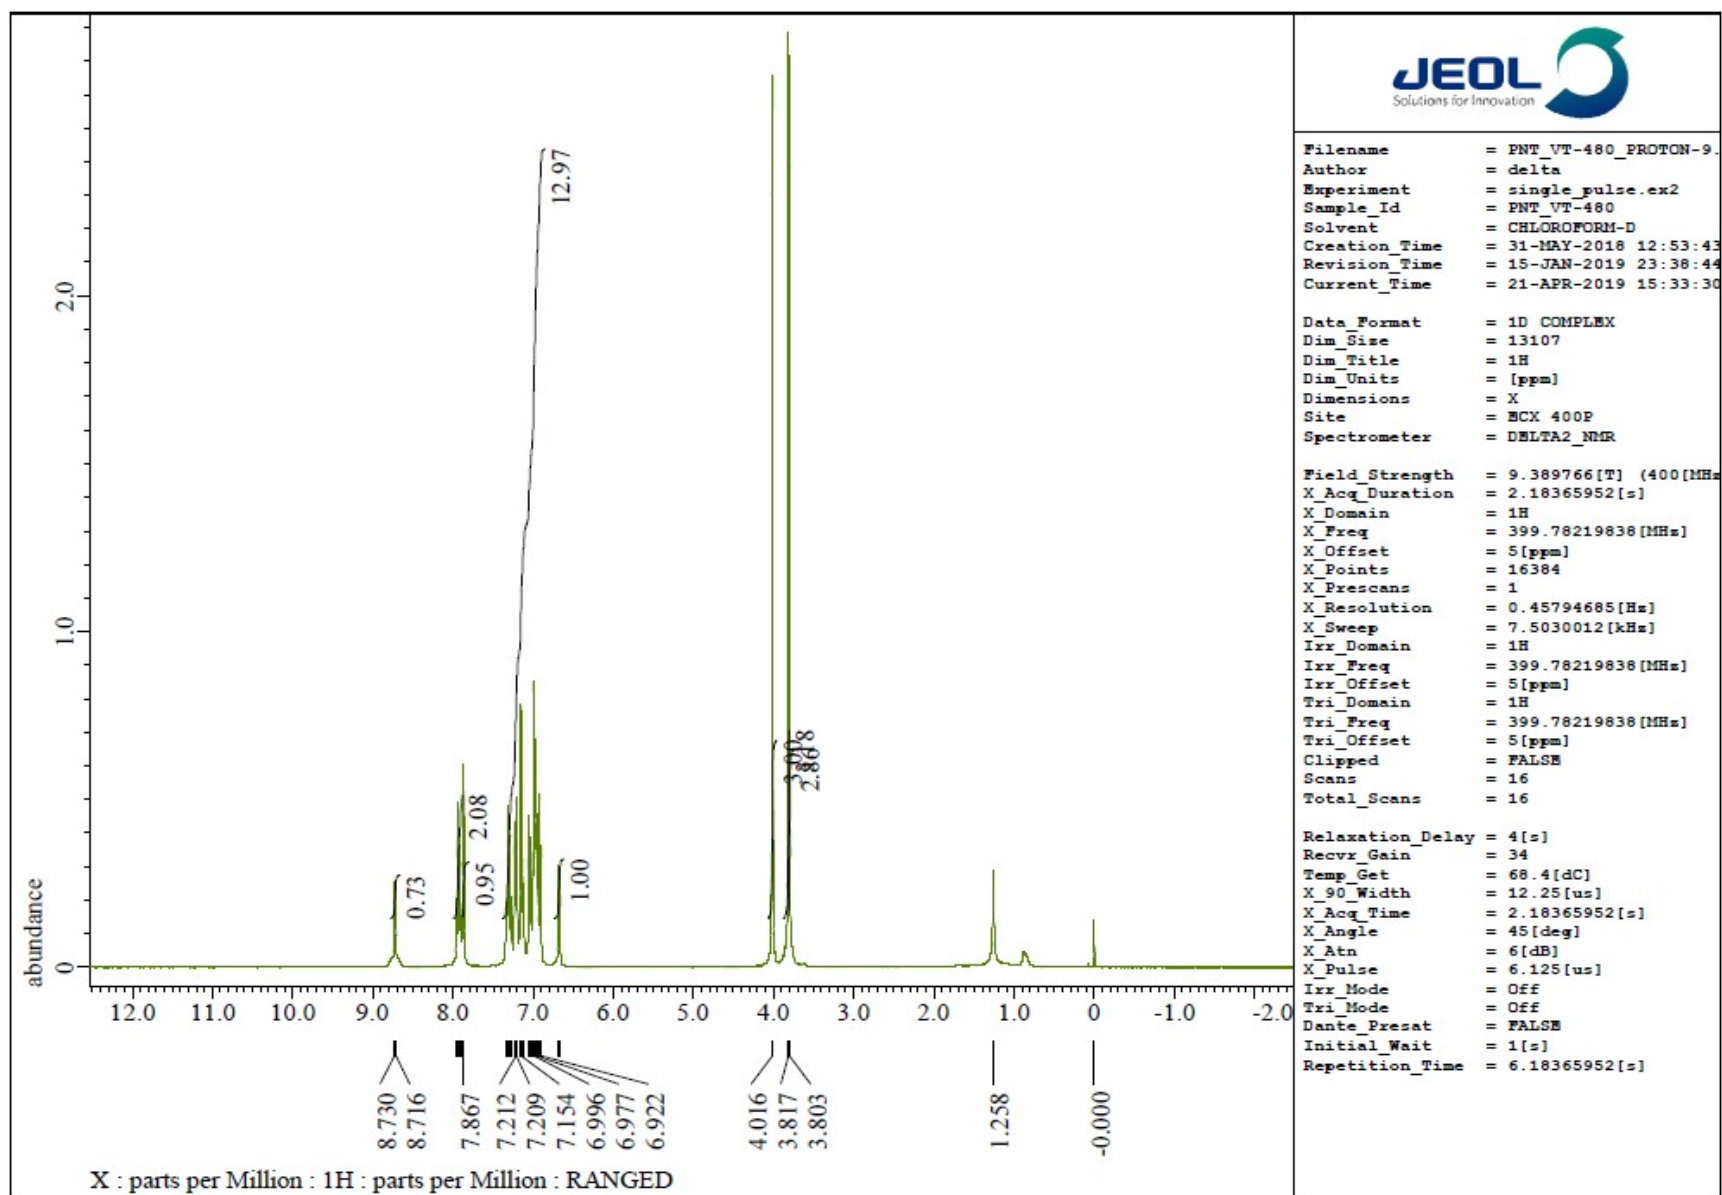

Fig. S177  $^1\text{H}$  NMR ( $\text{CDCl}_3$ , 400 MHz) spectrum of 19.

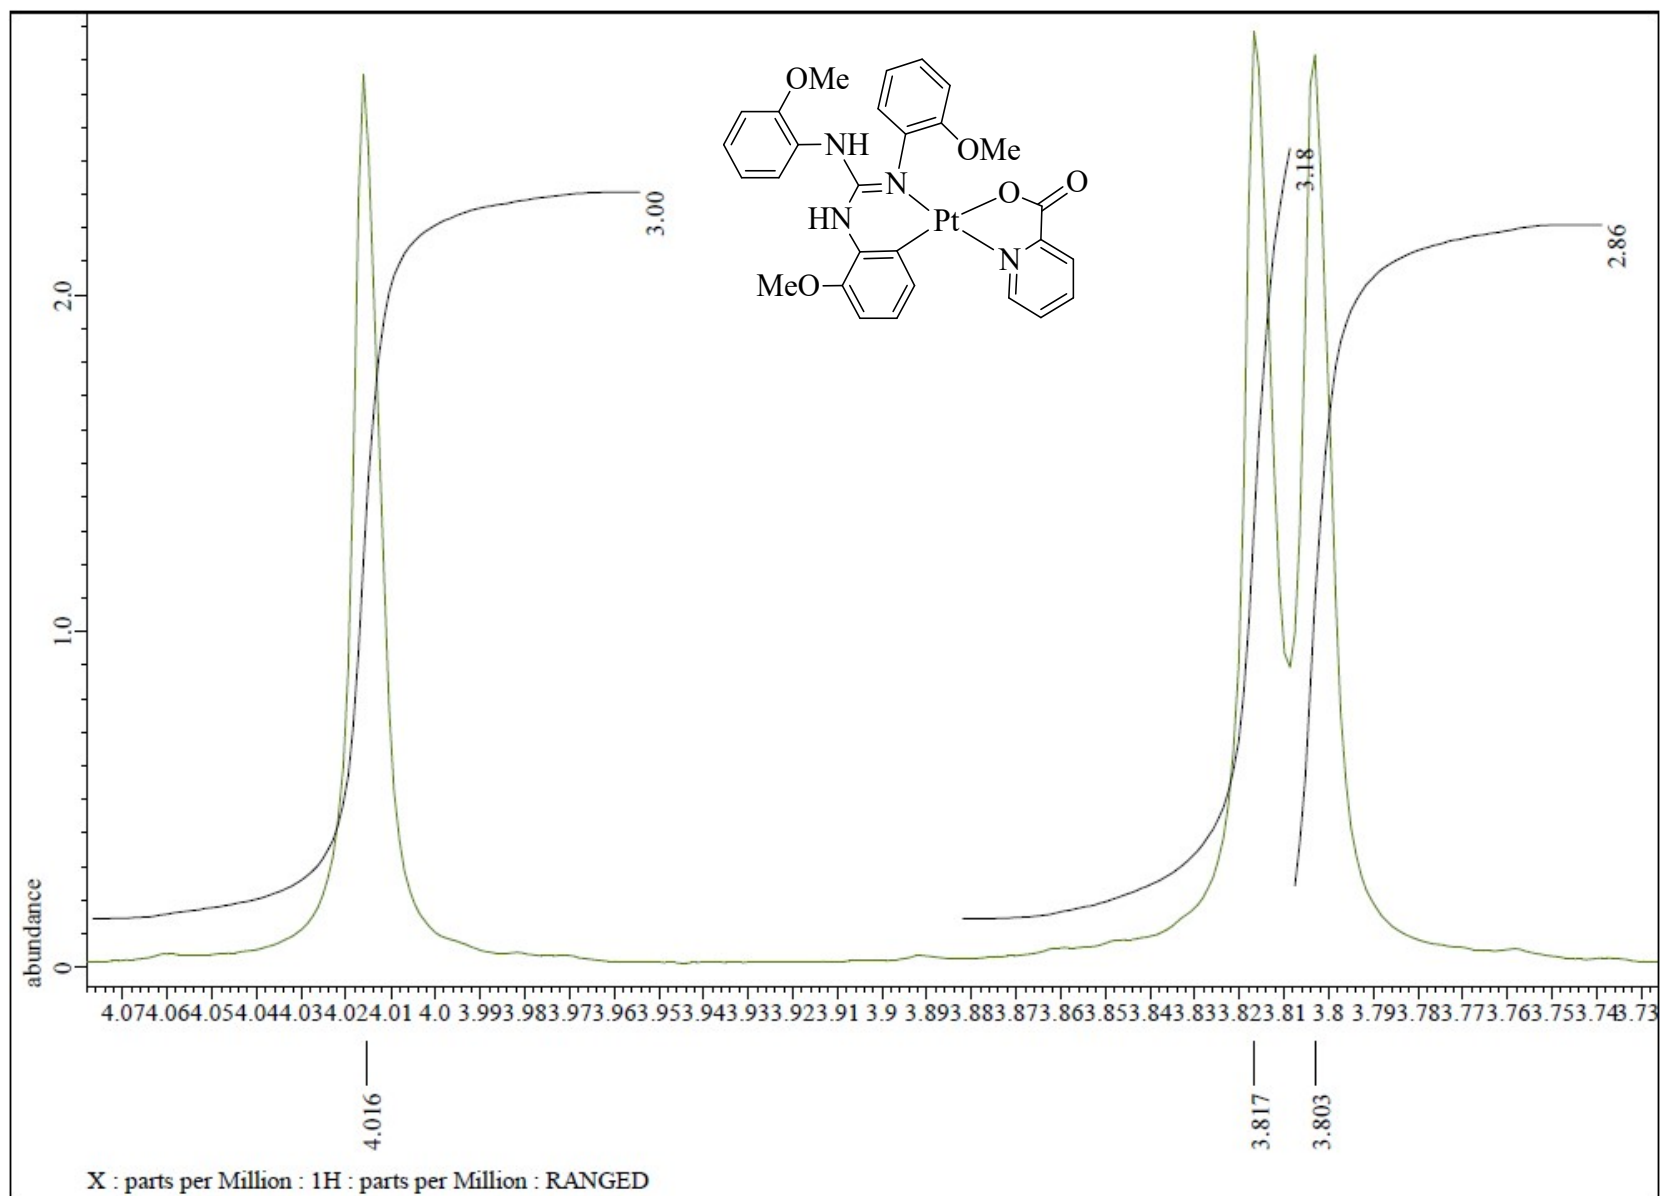

Fig. S178  $^1\text{H}$  NMR (CDCl<sub>3</sub>, 400 MHz) spectrum of **19** in the indicated region.

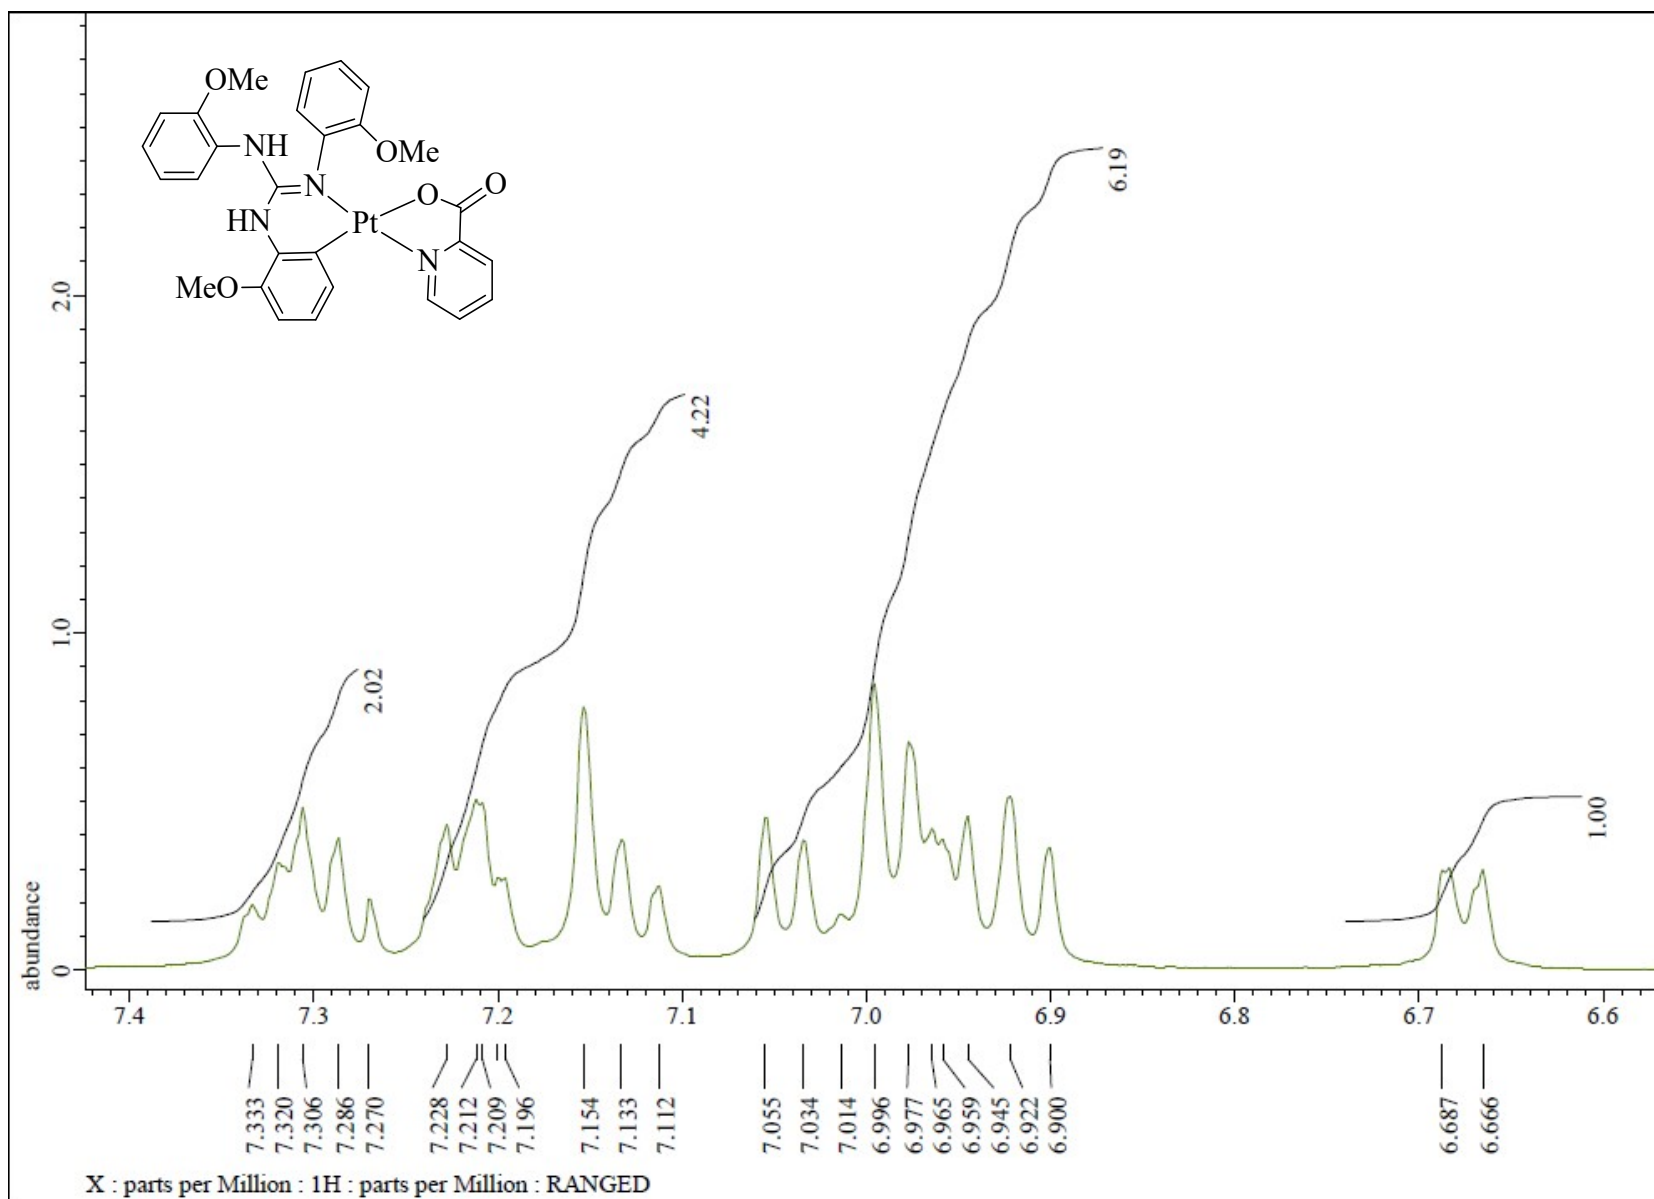

Fig. S179  $^1\text{H NMR}$  (CDCl<sub>3</sub>, 400 MHz) spectrum of **19** in the indicated region.

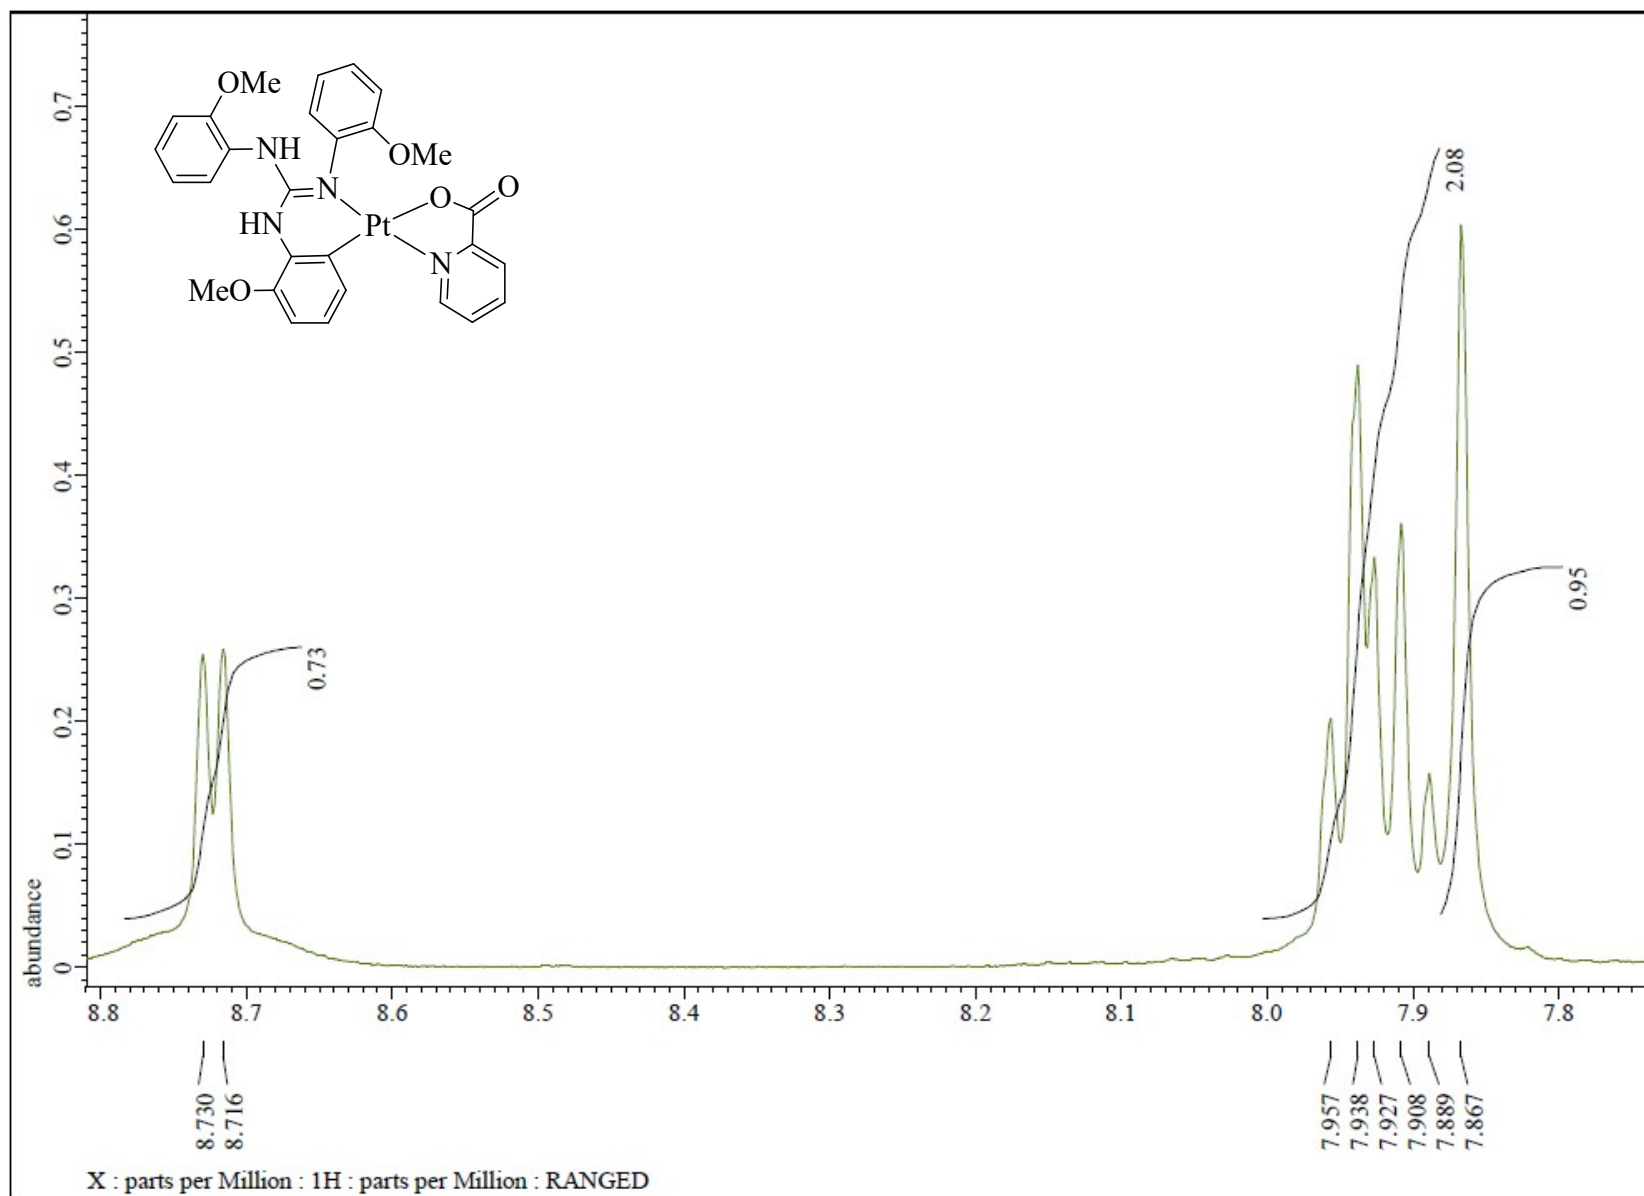

Fig. S180 <sup>1</sup>H NMR (CDCl<sub>3</sub>, 400 MHz) spectrum of **19** in the indicated region.

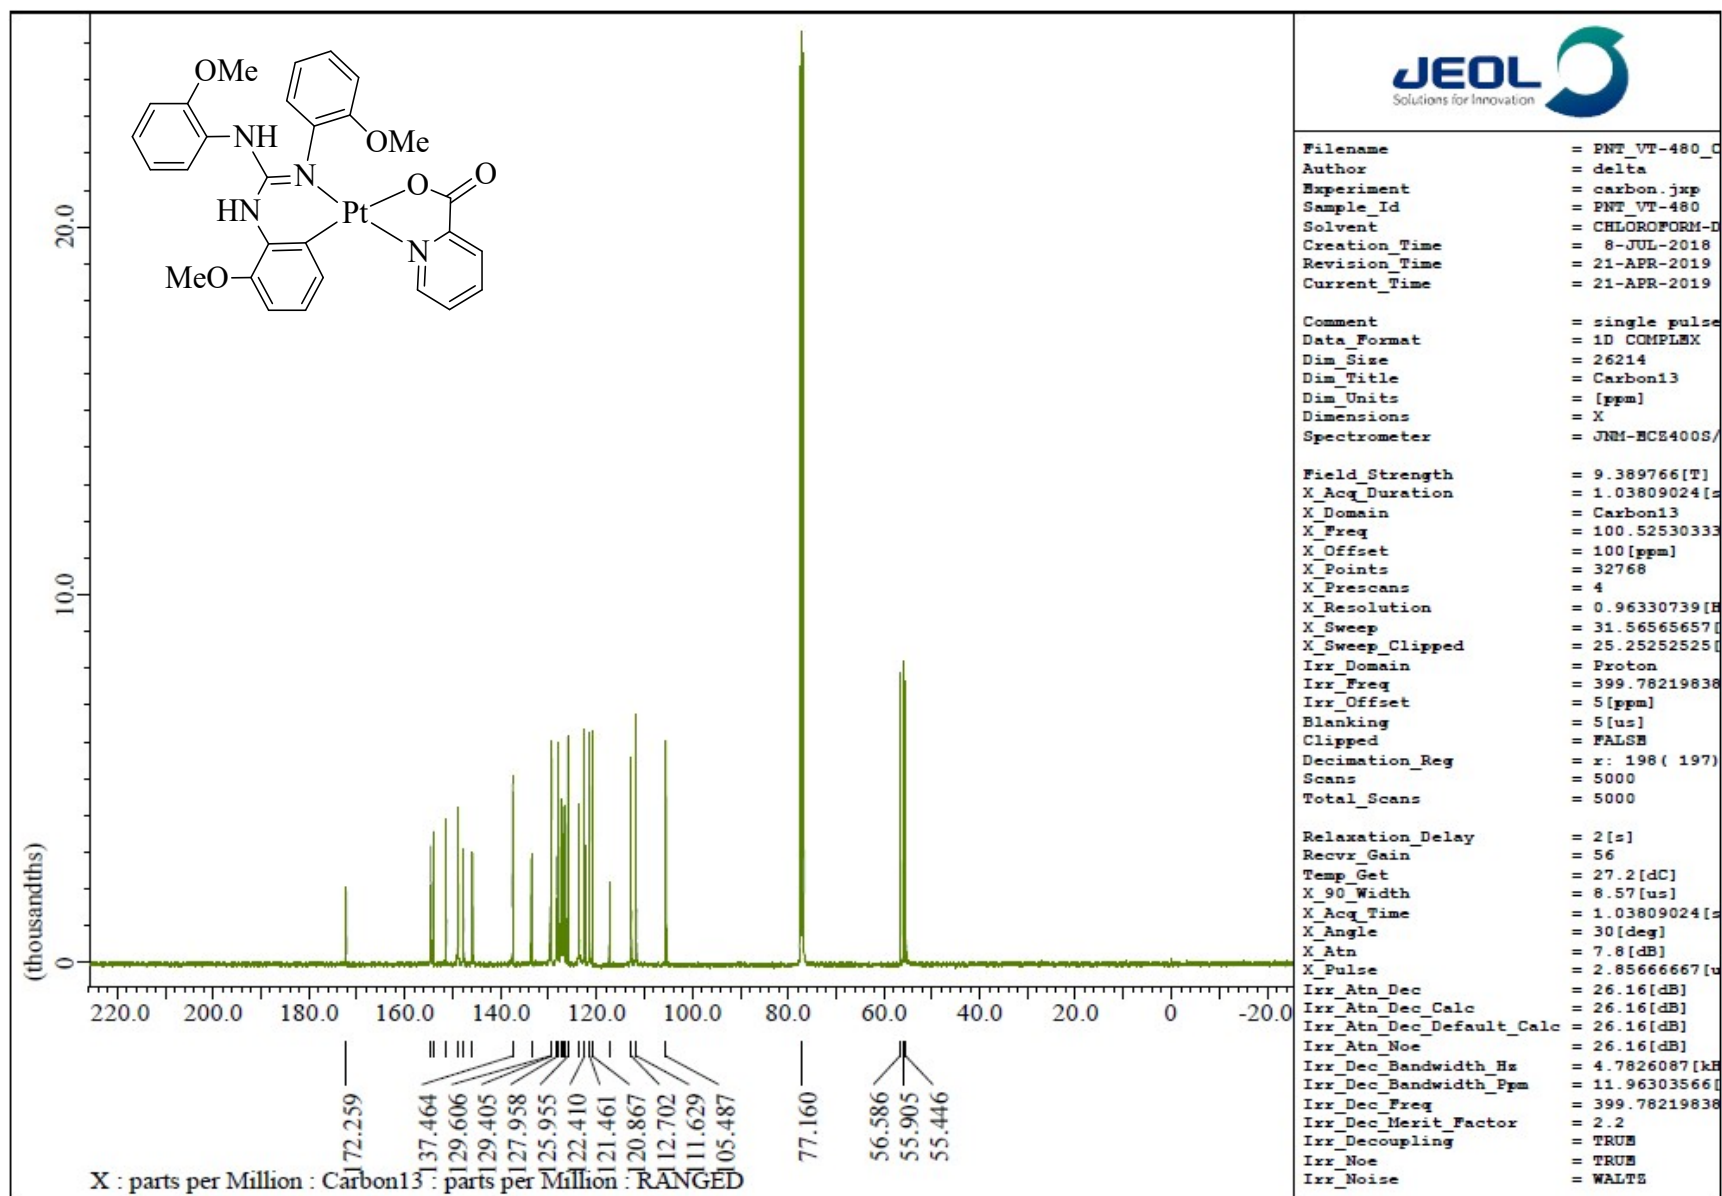

Fig. S181  $^{13}\text{C}\{^1\text{H}\}$ NMR ( $\text{CDCl}_3$ , 100.5 MHz) spectrum of 19.

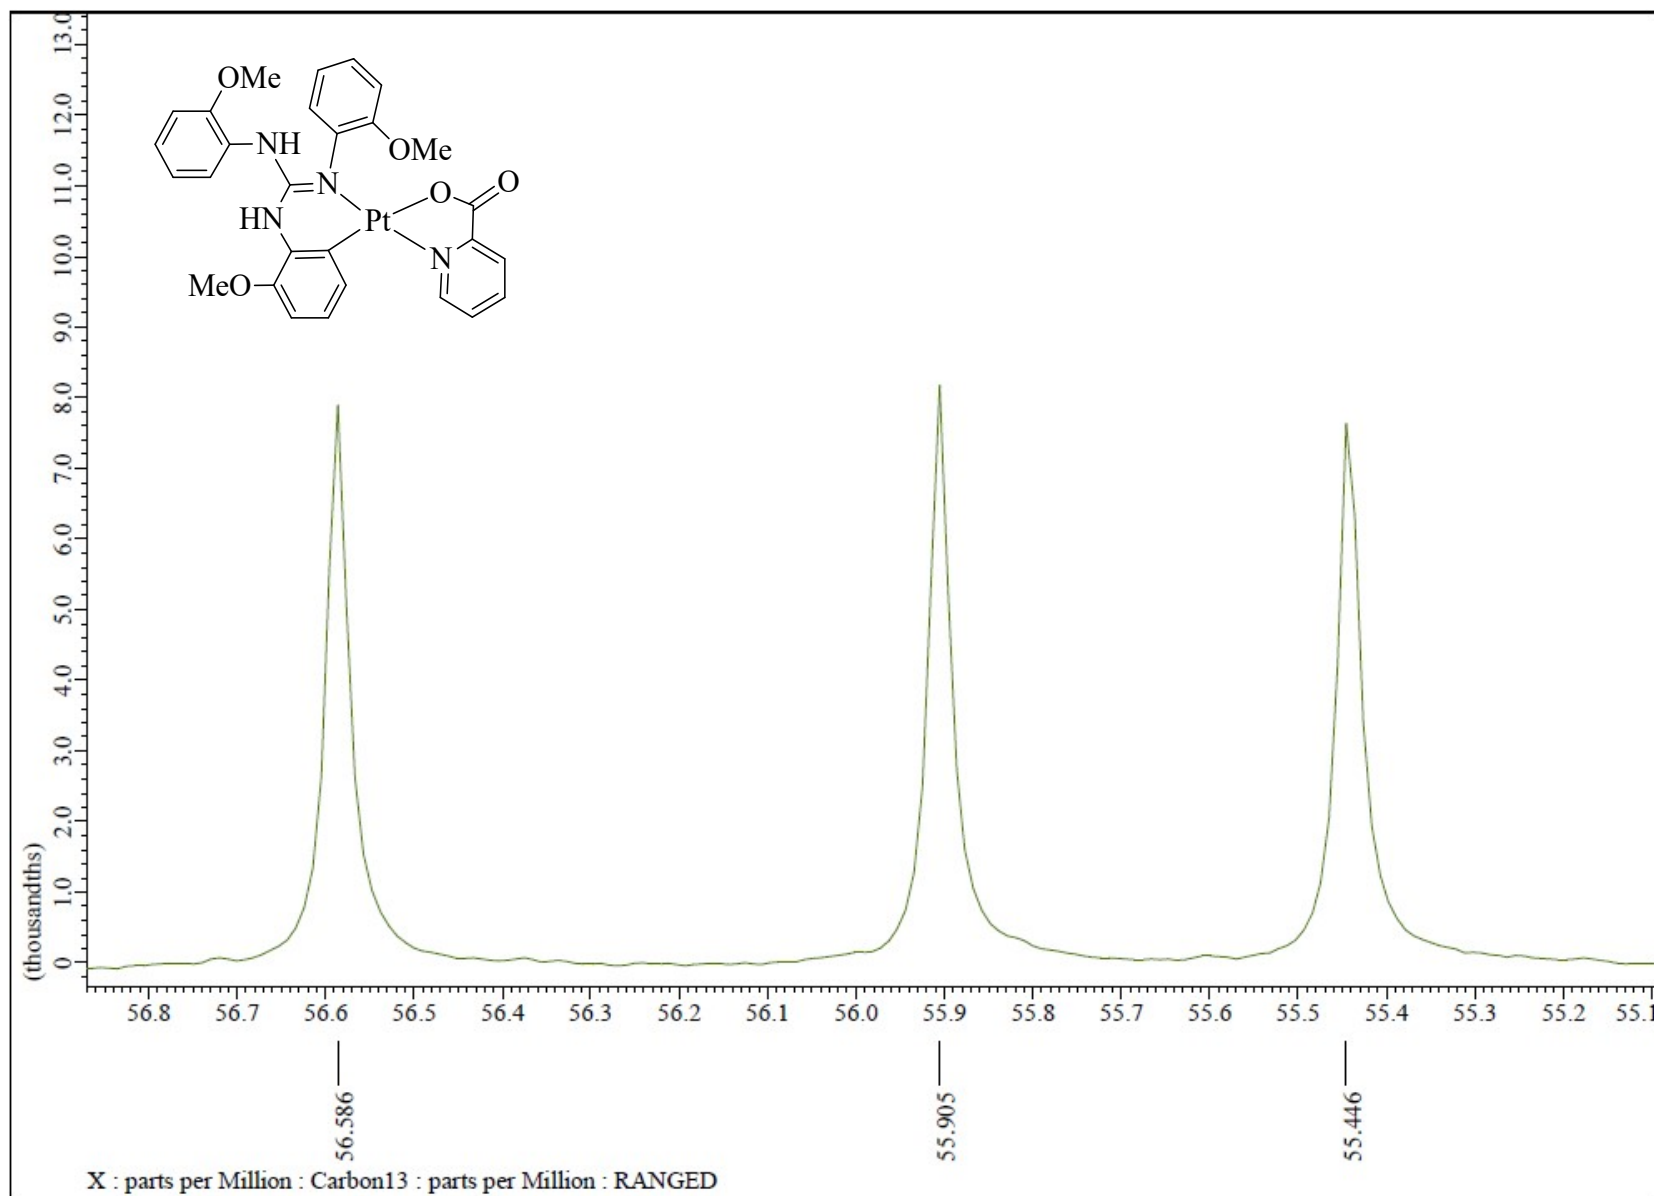

Fig. S182  $^{13}\text{C}\{^1\text{H}\}$  NMR ( $\text{CDCl}_3$ , 100.5 MHz) spectrum of **19** in the indicated region.



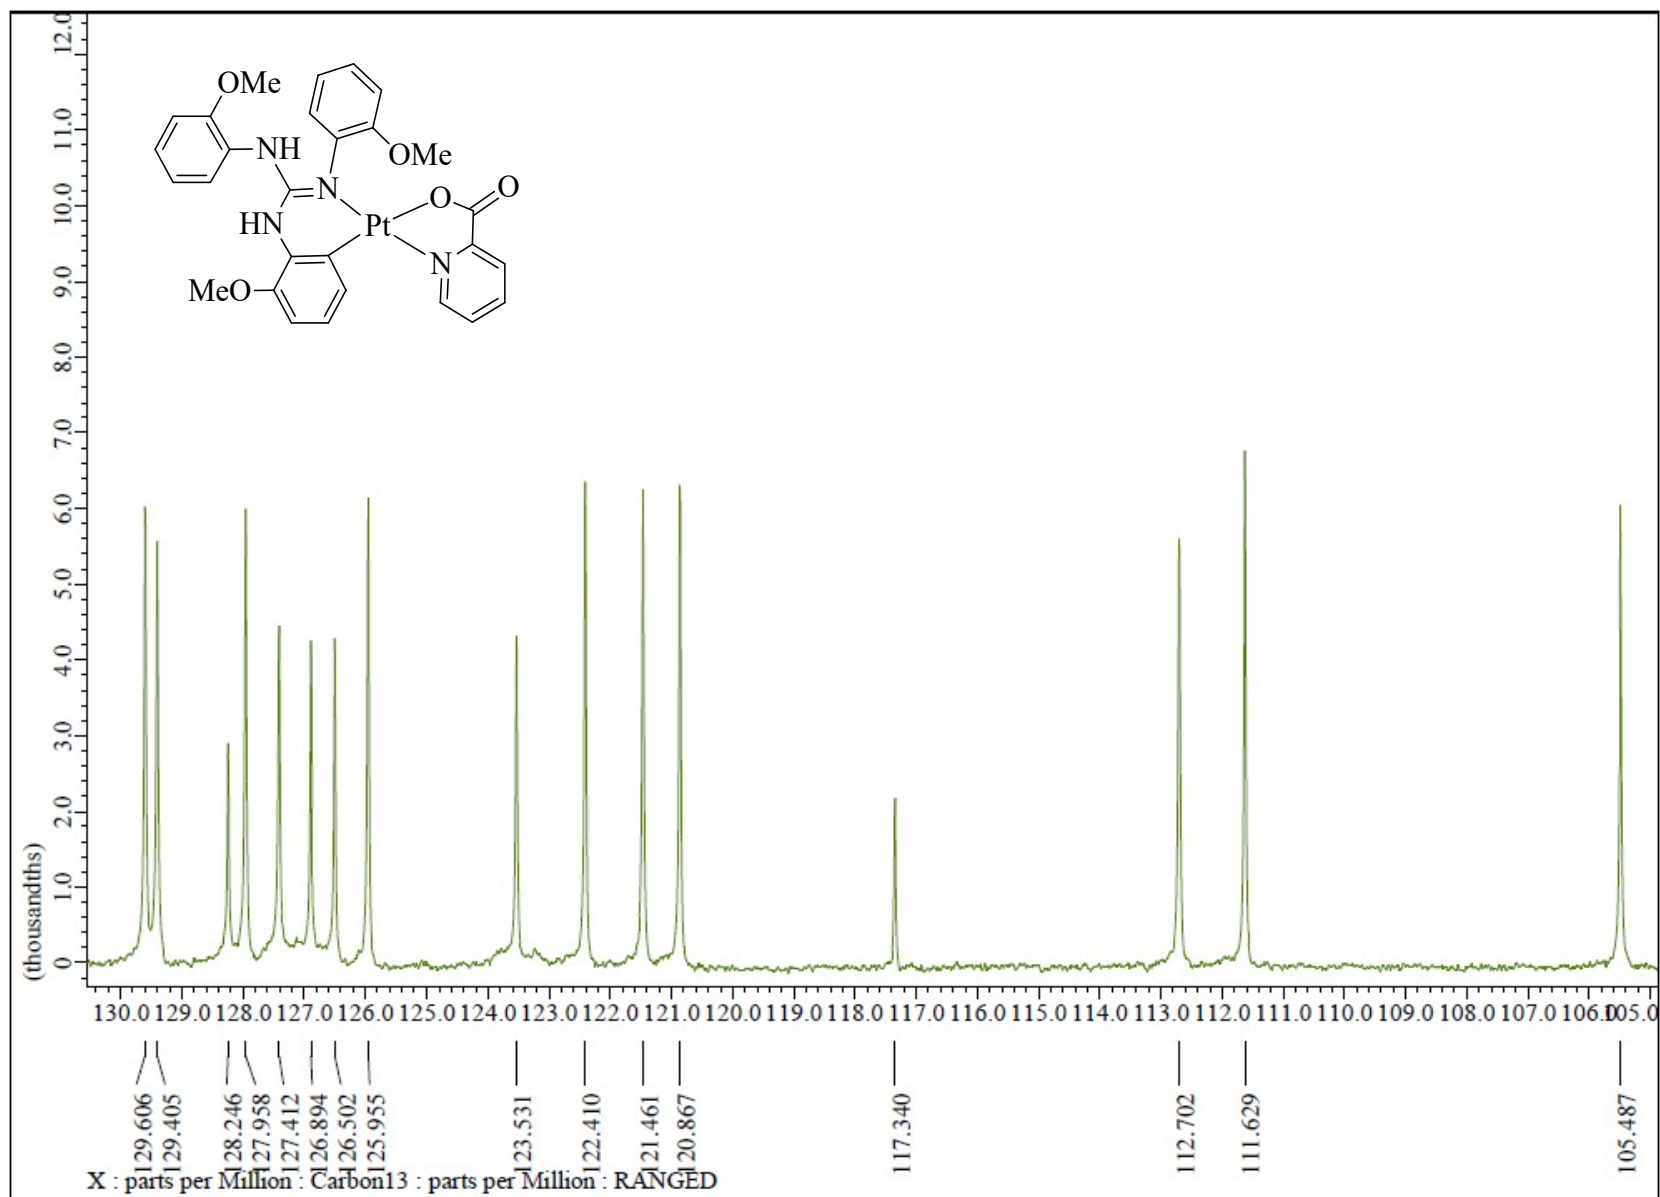

Fig. S183  $^{13}\text{C}\{^1\text{H}\}$  NMR (CDCl<sub>3</sub>, 100.5 MHz) spectrum of **19** in the indicated region.

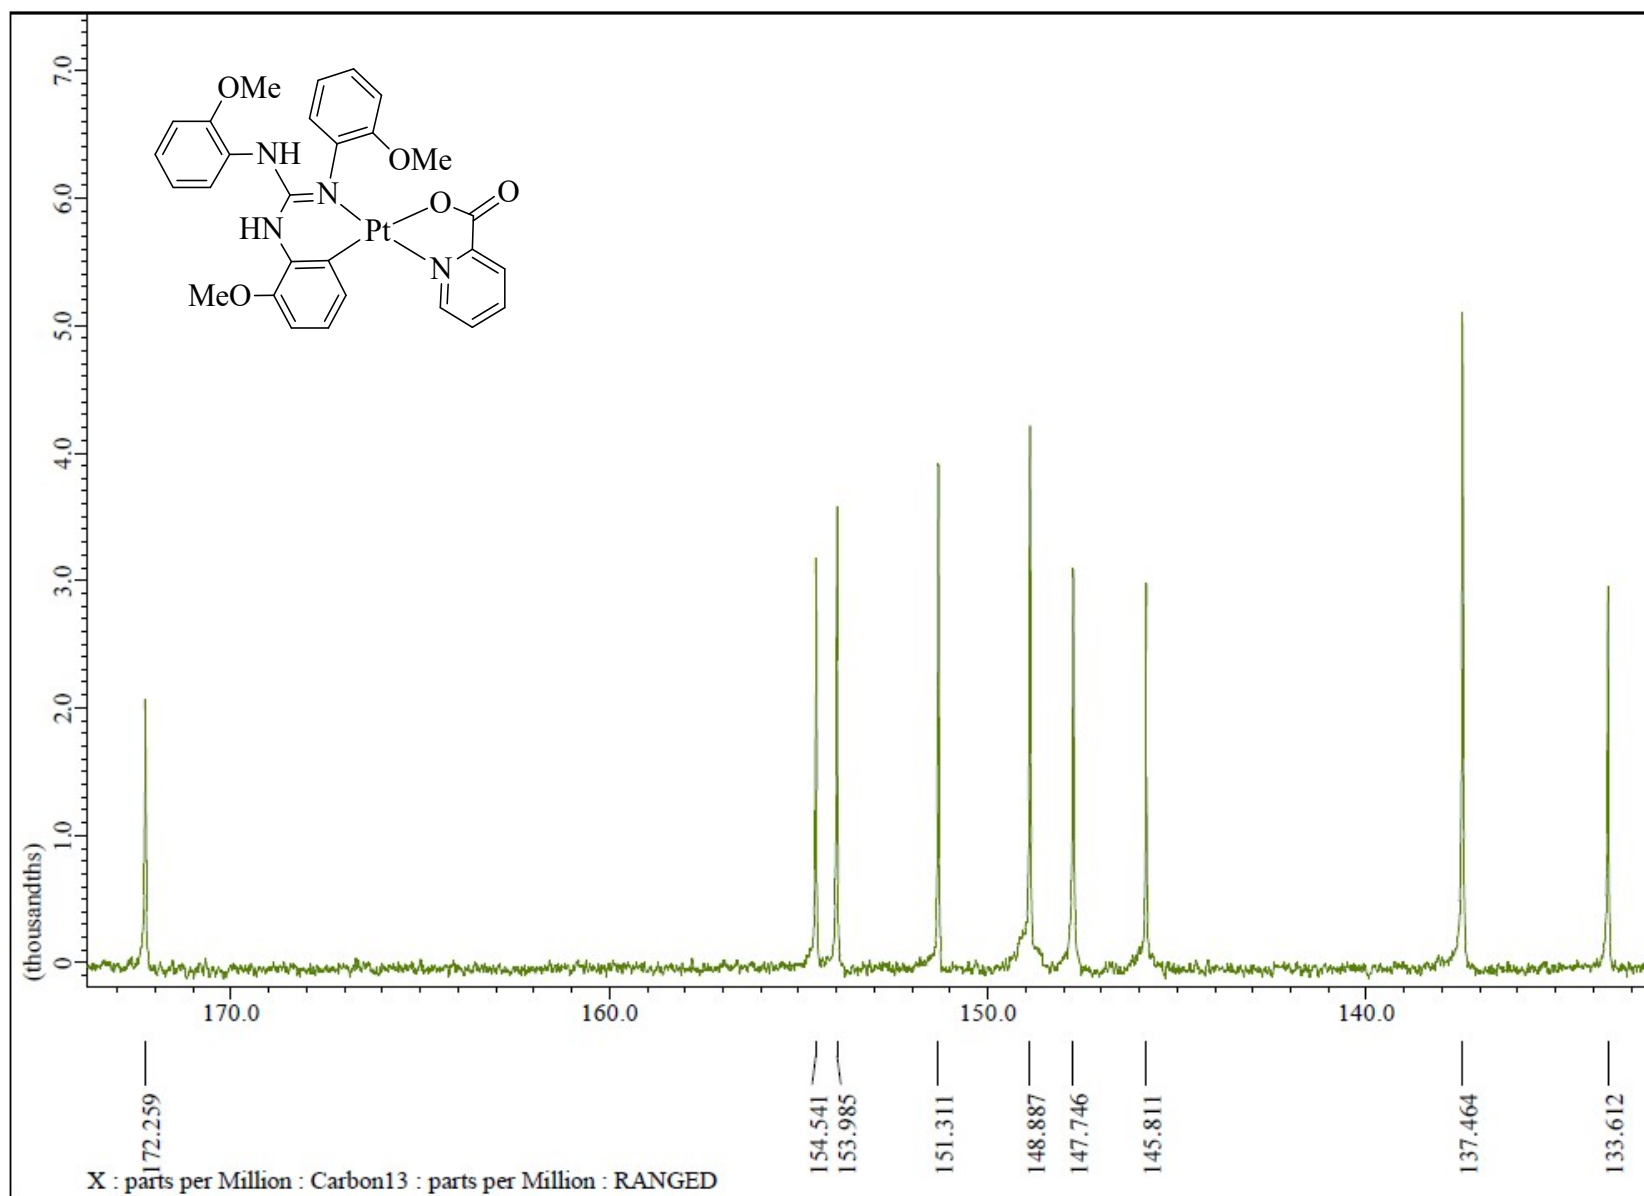

Fig. S184  $^{13}\text{C}\{^1\text{H}\}$  NMR (CDCl<sub>3</sub>, 100.5 MHz) spectrum of **19** in the indicated region.

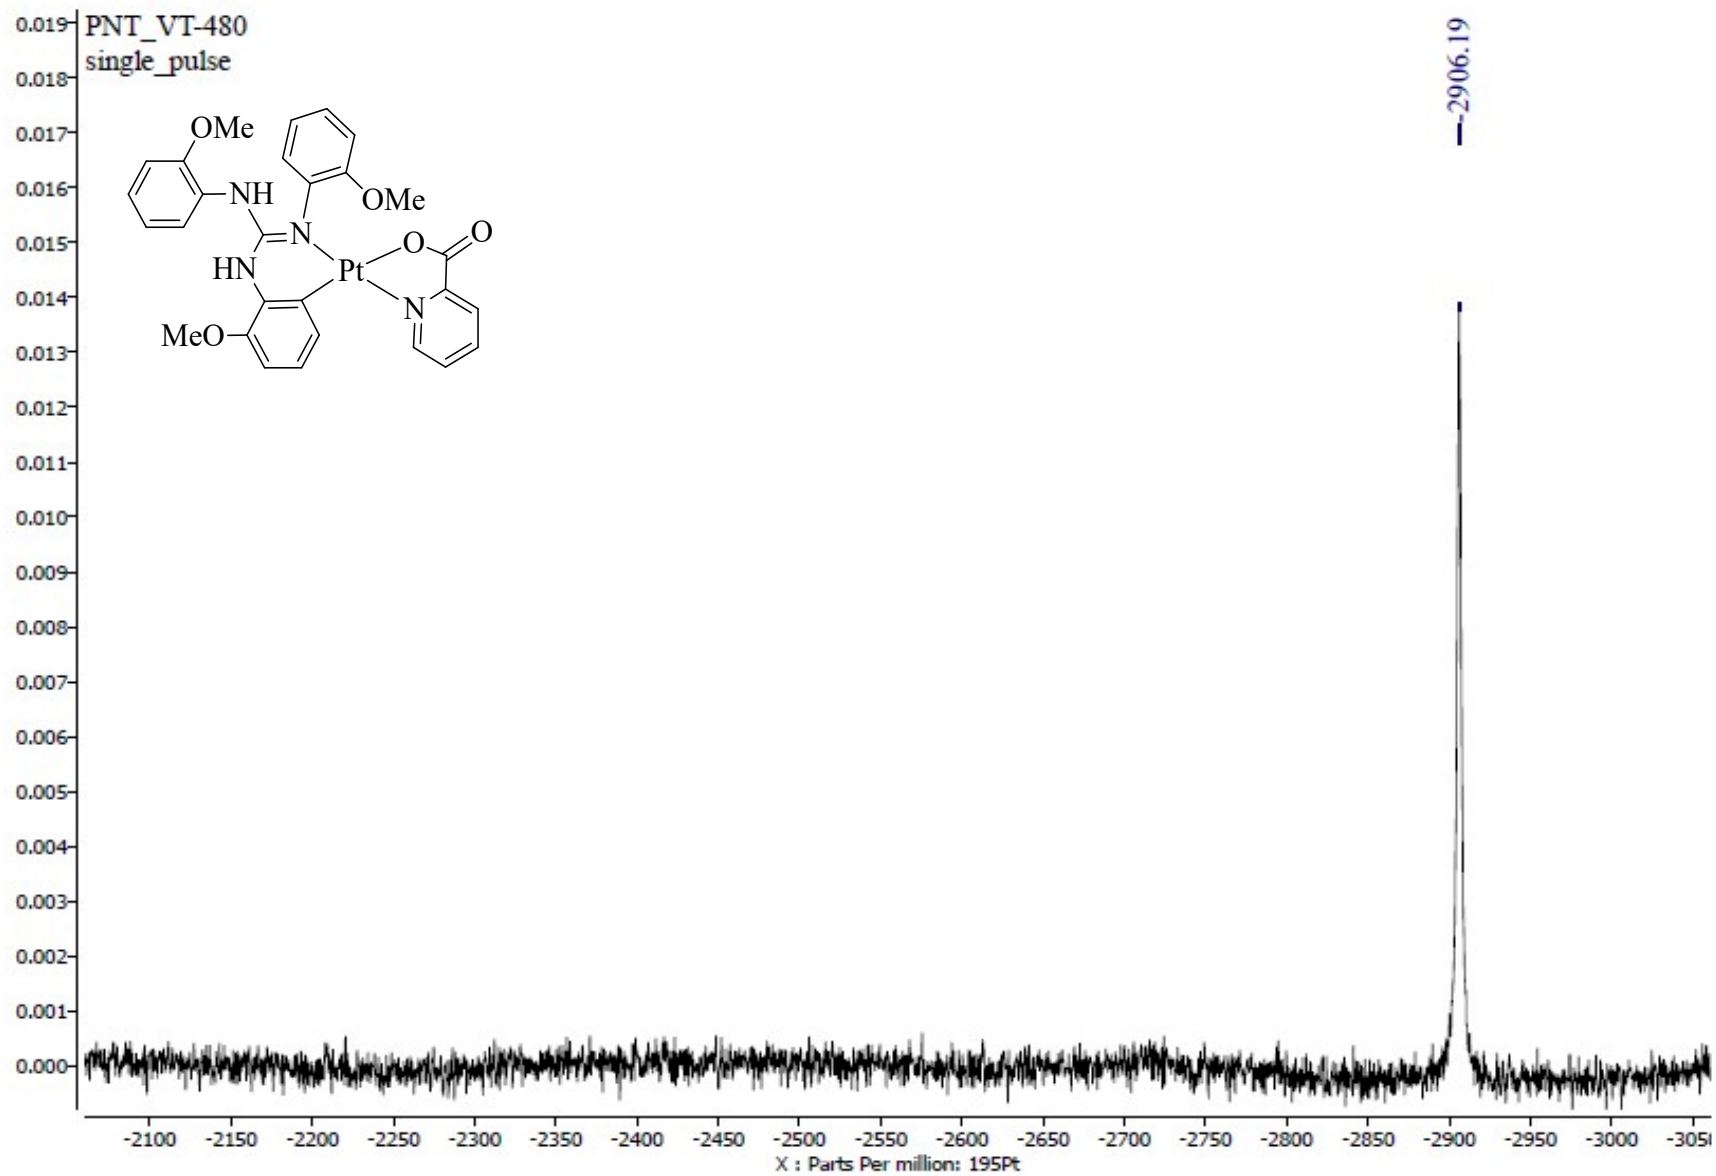

Fig. S185  $^{195}\text{Pt}\{^1\text{H}\}$  NMR ( $\text{CDCl}_3$ , 85.8 MHz) spectrum of **19**.

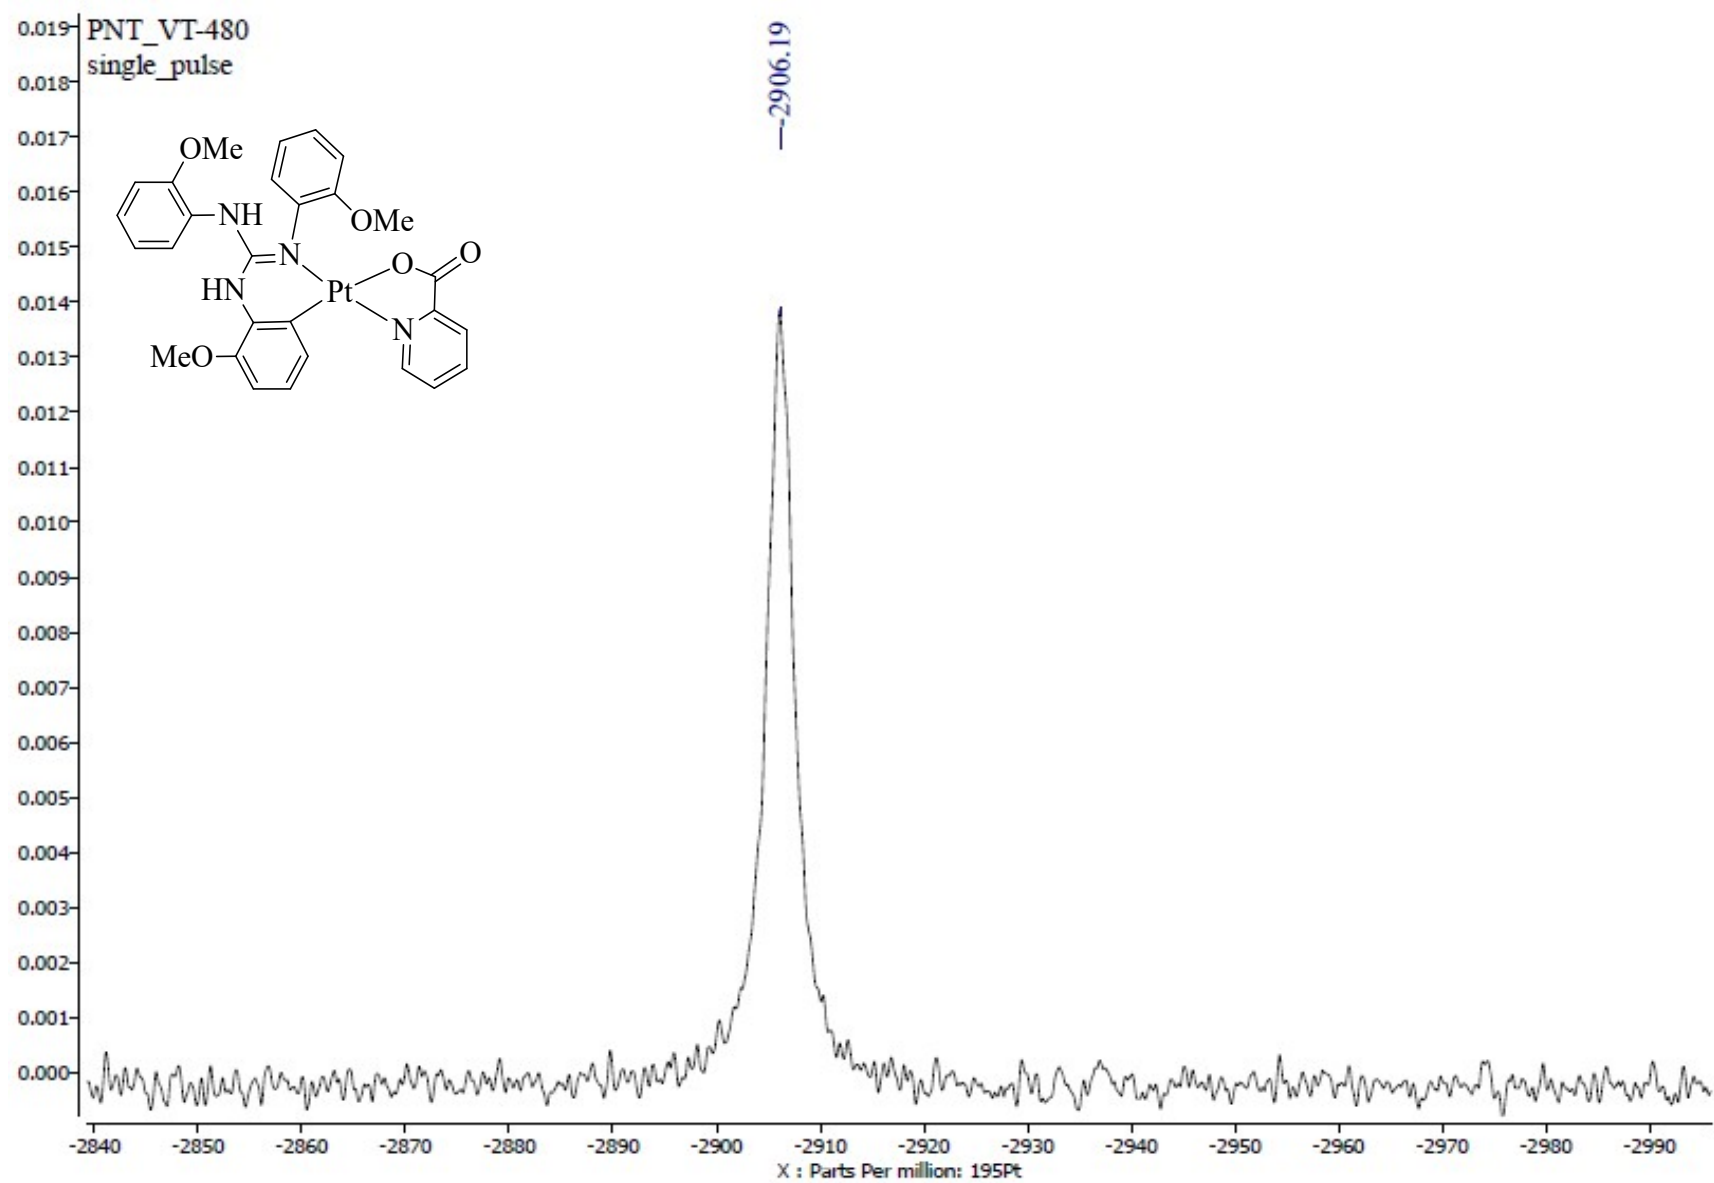

Fig. S186  $^{195}\text{Pt}\{^1\text{H}\}$  NMR ( $\text{CDCl}_3$ , 85.8 MHz) spectrum of **19** in the indicated region.

a

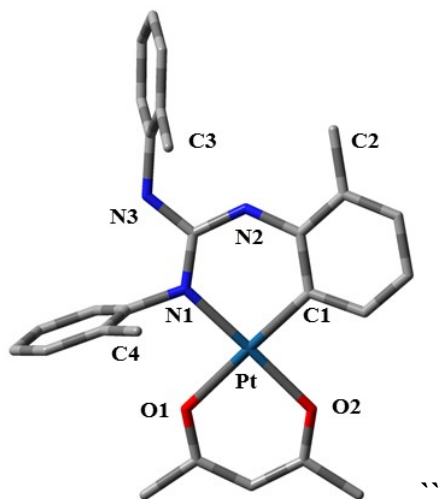

b

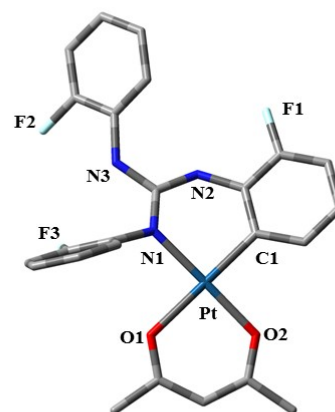

c

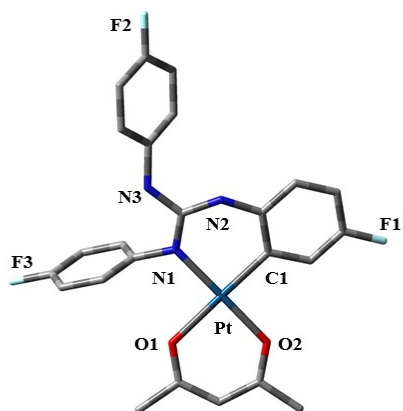

d

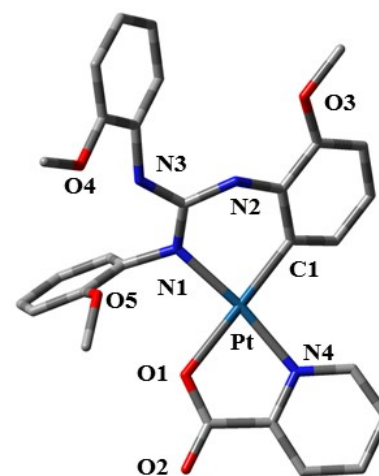

**Fig. S187** Optimized geometries of **11** (a), **15** (b), **18** (c) and **19** (d). All the hydrogen atoms have been deleted for the sake of clarity.

**Table S9** Selected bond angles (°) and bond lengths (Å) of **11**, **15**, **18** and **19** in ground state.

| Bond Lengths (Å) | <b>11</b> | <b>15</b> | <b>18</b> | <b>19</b> |
|------------------|-----------|-----------|-----------|-----------|
| Pt-N1            | 2.047     | 2.053     | 2.050     | 2.045     |
| Pt-C1            | 2.004     | 1.995     | 1.999     | 2.009     |
| Pt-O1            | 2.157     | 2.144     | 2.147     | 2.147     |
| Pt-O2/N4         | 2.056     | 2.046     | 2.048     | 2.068     |
| Bond Angles (°)  |           |           |           |           |
| N1-Pt-C1         | 91.78     | 91.10     | 91.18     | 86.87     |
| N1-Pt-O1         | 89.27     | 88.75     | 89.61     | 92.45     |
| O1-Pt-O2         | 89.07     | 90.34     | 89.76     | 79.18     |
| C1-Pt-O2         | 89.87     | 89.81     | 89.45     | 101.55    |

**Table S10** Total energies in hartrees (a.u.) of **11**, **15**, **18** and **19** in ground state.

| Conformer | E (gas phase)<br>(hartree) | E<br>(dichloromethane)<br>(hartree) |
|-----------|----------------------------|-------------------------------------|
| <b>11</b> | -1480.2726165              | -1478.8011715                       |
| <b>15</b> | -1660.0225111              | -1659.1726203                       |
| <b>18</b> | -1660.0200515              | -1658.8768318                       |
| <b>19</b> | -1796.9522634              | -1795.5061360                       |

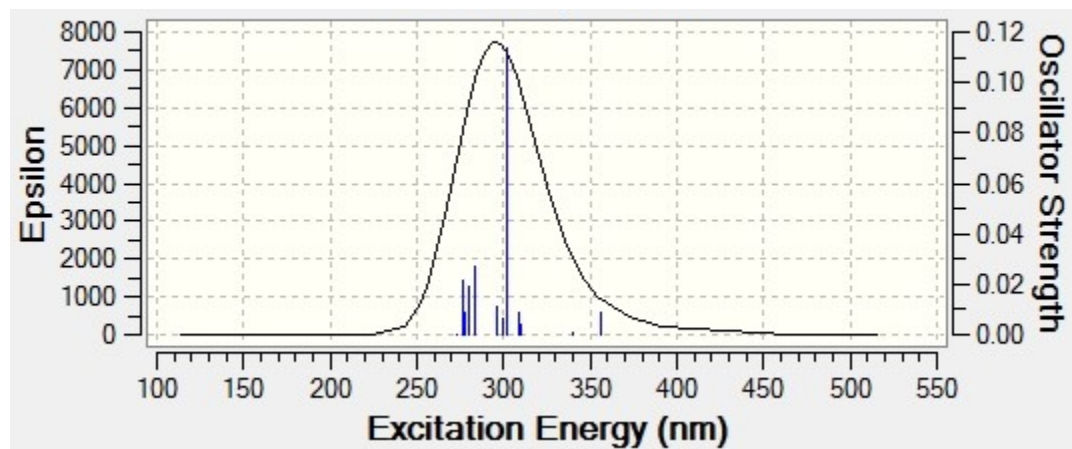

**Fig. S188.** TD-DFT predicted absorption spectra of **11**.

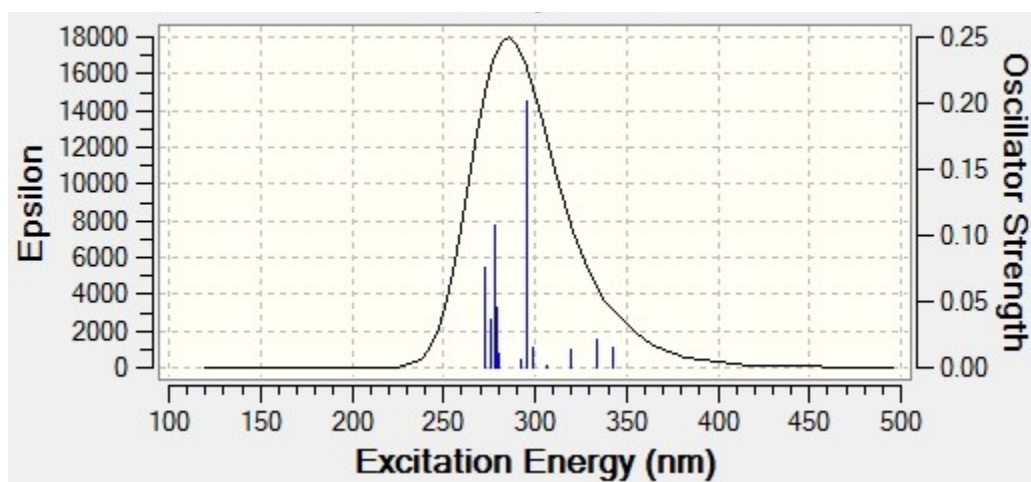

**Fig. S189.** TD-DFT predicted absorption spectra of **15**.

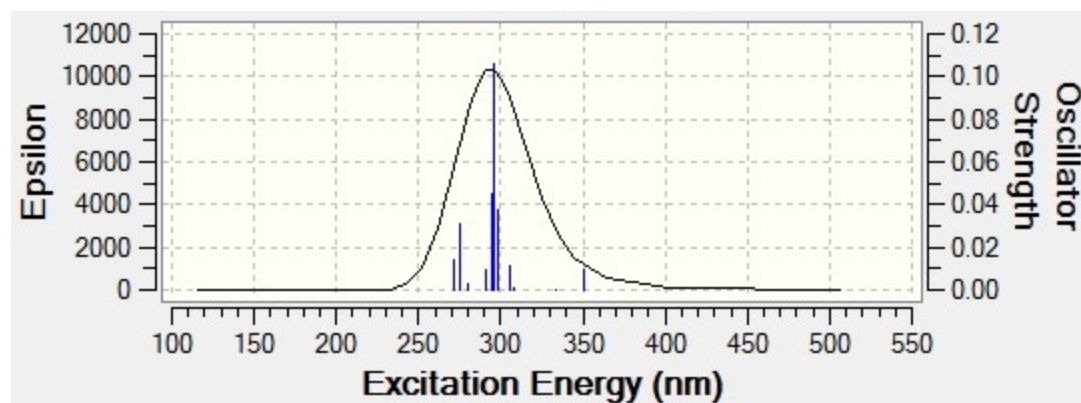

**Fig. S190.** TD-DFT predicted absorption spectra of **18**.

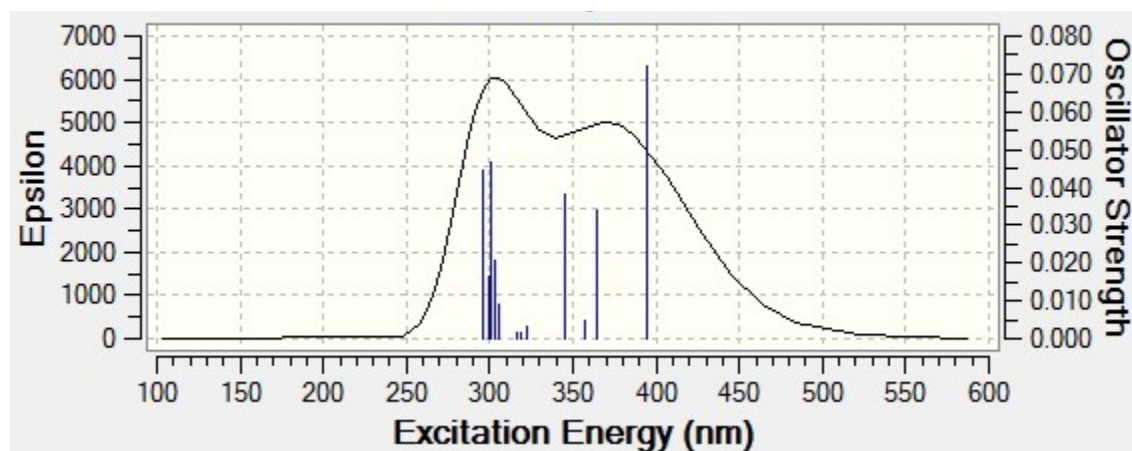

**Fig. S191.** TD-DFT predicted absorption spectra of **19**.



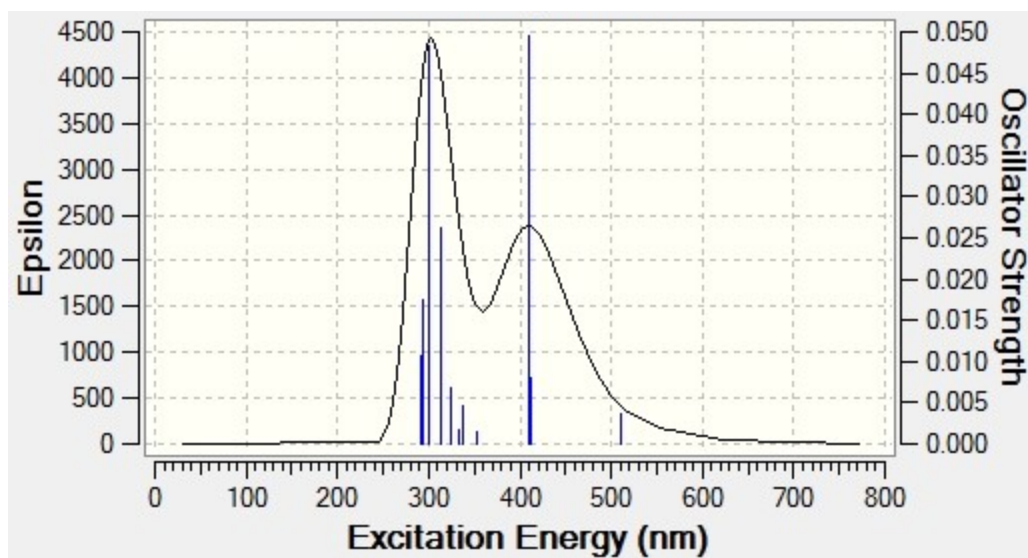

**Fig S192** TD-DFT predicated emission spectra of **11**.

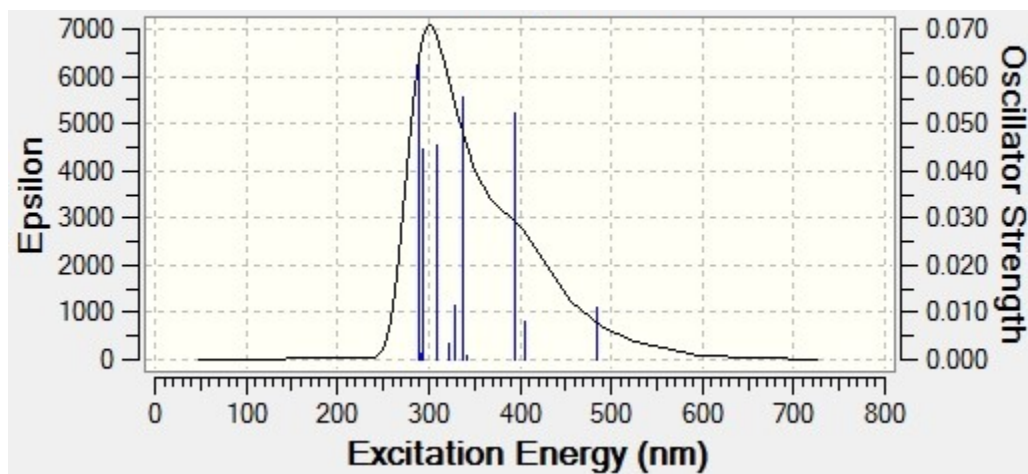

**Fig. S193** TD-DFT predicated emission spectra of **15**.

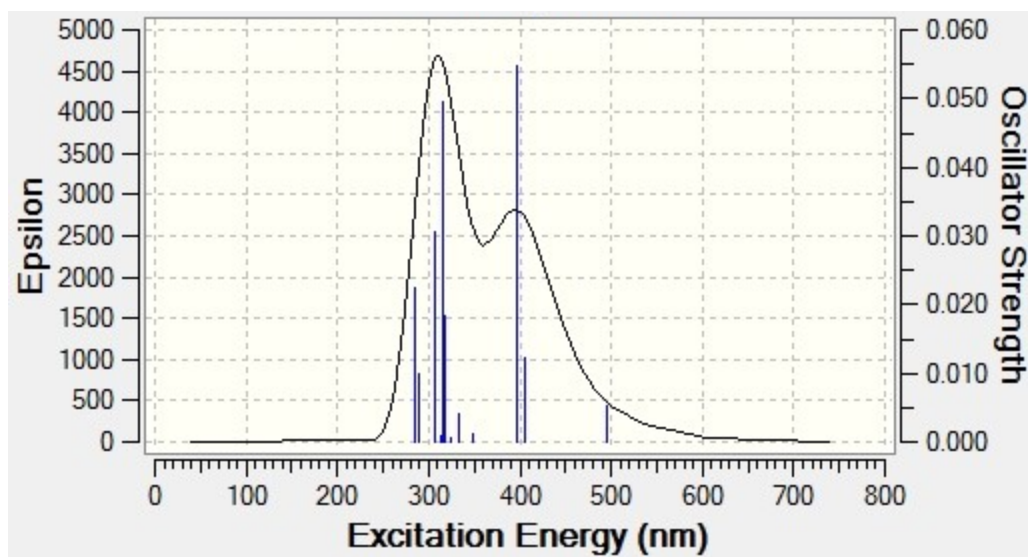

Fig. S194. TD-DFT predicted emission spectra of **18**.

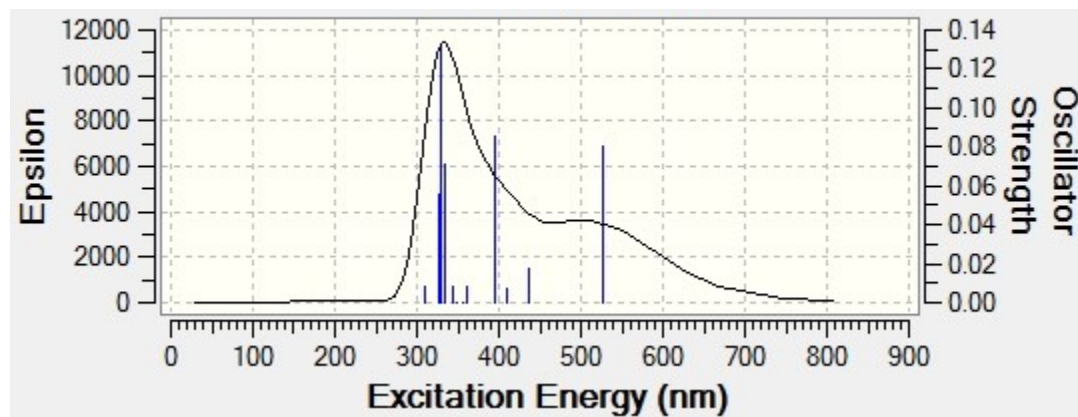

Fig. S195 TD-DFT predicted emission spectra of **19**.

**Table S11** The energies (nm), oscillator strength (*f*), type of transition and the contribution of the main orbitals involved in the absorption spectra (in %) for **11**, **15**, **18** and **19** using TD-DFT.

| Energy (nm) | Oscillator strength ( <i>f</i> ) | Transitions                            | Energy (nm) | Oscillator strength ( <i>f</i> ) | Transitions                             |
|-------------|----------------------------------|----------------------------------------|-------------|----------------------------------|-----------------------------------------|
| <b>11</b>   |                                  |                                        | <b>18</b>   |                                  |                                         |
| <b>302</b>  | <b>0.1137</b>                    | <b>HOMO-1→LUMO (83%)</b>               | 298         | 0.0379                           | HOMO→LUMO +1 (27%)                      |
| 283         | 0.0271                           | HOMO→LUMO + 3 (67%)                    | <b>296</b>  | <b>0.1063</b>                    | <b>HOMO-1→LUMO (59%)</b>                |
| 279         | 0.0192                           | HOMO-3→LUMO (26%)<br>HOMO-2→LUMO (47%) | 294         | 0.0447                           | HOMO→LUMO +2 (29%)                      |
| 276         | 0.0217                           | HOMO→LUMO + 5 (39%)                    | 275         | 0.0309                           | HOMO→LUMO +5 (71%)                      |
| <b>15</b>   |                                  |                                        | <b>19</b>   |                                  |                                         |
| <b>295</b>  | <b>0.2017</b>                    | <b>HOMO-1→LUMO (89%)</b>               | <b>395</b>  | <b>0.0721</b>                    | <b>HOMO→LUMO (91%)</b>                  |
| 278         | 0.107                            | HOMO→LUMO +4 (53%)                     | 365         | 0.0337                           | HOMO-2→LUMO (61%)                       |
| 272         | 0.0757                           | HOMO-3→LUMO +1 (23%)                   | 346         | 0.0379                           | HOMO-1→LUMO (66%)                       |
|             |                                  |                                        | 301         | 0.0468                           | HOMO→LUMO +2 (62%)                      |
|             |                                  |                                        | 296         | 0.0447                           | HOMO-7→LUMO (28%),<br>HOMO-6→LUMO (28%) |

**Table S12** Some of the selected energies (nm), oscillator strength ( $f$ ), type of transition and the contribution of the main orbitals involved in the emission spectra (in %) for **11**, **15**, **18** and **19** using TD-DFT.

| Energy (nm) | Oscillator strength ( $f$ ) | Transitions                                | Energy (nm) | Oscillator strength ( $f$ ) | Transitions                                                       |
|-------------|-----------------------------|--------------------------------------------|-------------|-----------------------------|-------------------------------------------------------------------|
| <b>11</b>   |                             |                                            | <b>18</b>   |                             |                                                                   |
| 512         | <b>0.0037</b>               | LUMO → HOMO (22%)                          | 494         | 0.0052                      | LUMO → HOMO (23%)                                                 |
| <b>410</b>  | <b>0.0494</b>               | <b>LUMO → HOMO-1 (93%)</b>                 | <b>396</b>  | <b>0.0548</b>               | <b>LUMO → HOMO-1 (82%)</b>                                        |
| 313         | 0.0263                      | LUMO → HOMO-5 (47%)                        | 316         | 0.0496                      | LUMO+2 → HOMO (34%)<br>LUMO+3 → HOMO (54%)                        |
| 301         | 0.0483                      | LUMO+3 → HOMO (36%)                        | 306         | 0.0306                      | LUMO → HOMO-8 (21%)<br>LUMO → HOMO-7 (18%)<br>LUMO → HOMO-6 (18%) |
|             |                             |                                            | 284         | 0.0224                      | LUMO+5 → HOMO (34%)                                               |
| <b>15</b>   |                             |                                            | <b>19</b>   |                             |                                                                   |
| 484         | 0.0109                      | LUMO → HOMO (27%)                          | <b>525</b>  | <b>0.0808</b>               | <b>LUMO → HOMO (96%)</b>                                          |
| <b>394</b>  | <b>0.052</b>                | <b>LUMO → HOMO-1 (92%)</b>                 | 396         | 0.0995                      | LUMO → HOMO (91%)                                                 |
| 337         | 0.0556                      | LUMO+1 → HOMO (90%)                        | 333         | 0.0725                      | LUMO+2 → HOMO (51%)<br>LUMO+3 → HOMO (31%)                        |
| 309         | 0.0455                      | LUMO → HOMO-8 (34%)<br>LUMO → HOMO-4 (33%) | 330         | 0.13                        | LUMO+2 → HOMO (68%)                                               |
| 292         | 0.0446                      | LUMO+4 → HOMO (48%)                        | 327         | 0.0568                      | LUMO+2 → HOMO (27%)<br>LUMO+3 → HOMO (50%)                        |
| 289         | 0.064                       | LUMO+1 → HOMO-1 (35%)                      |             |                             |                                                                   |

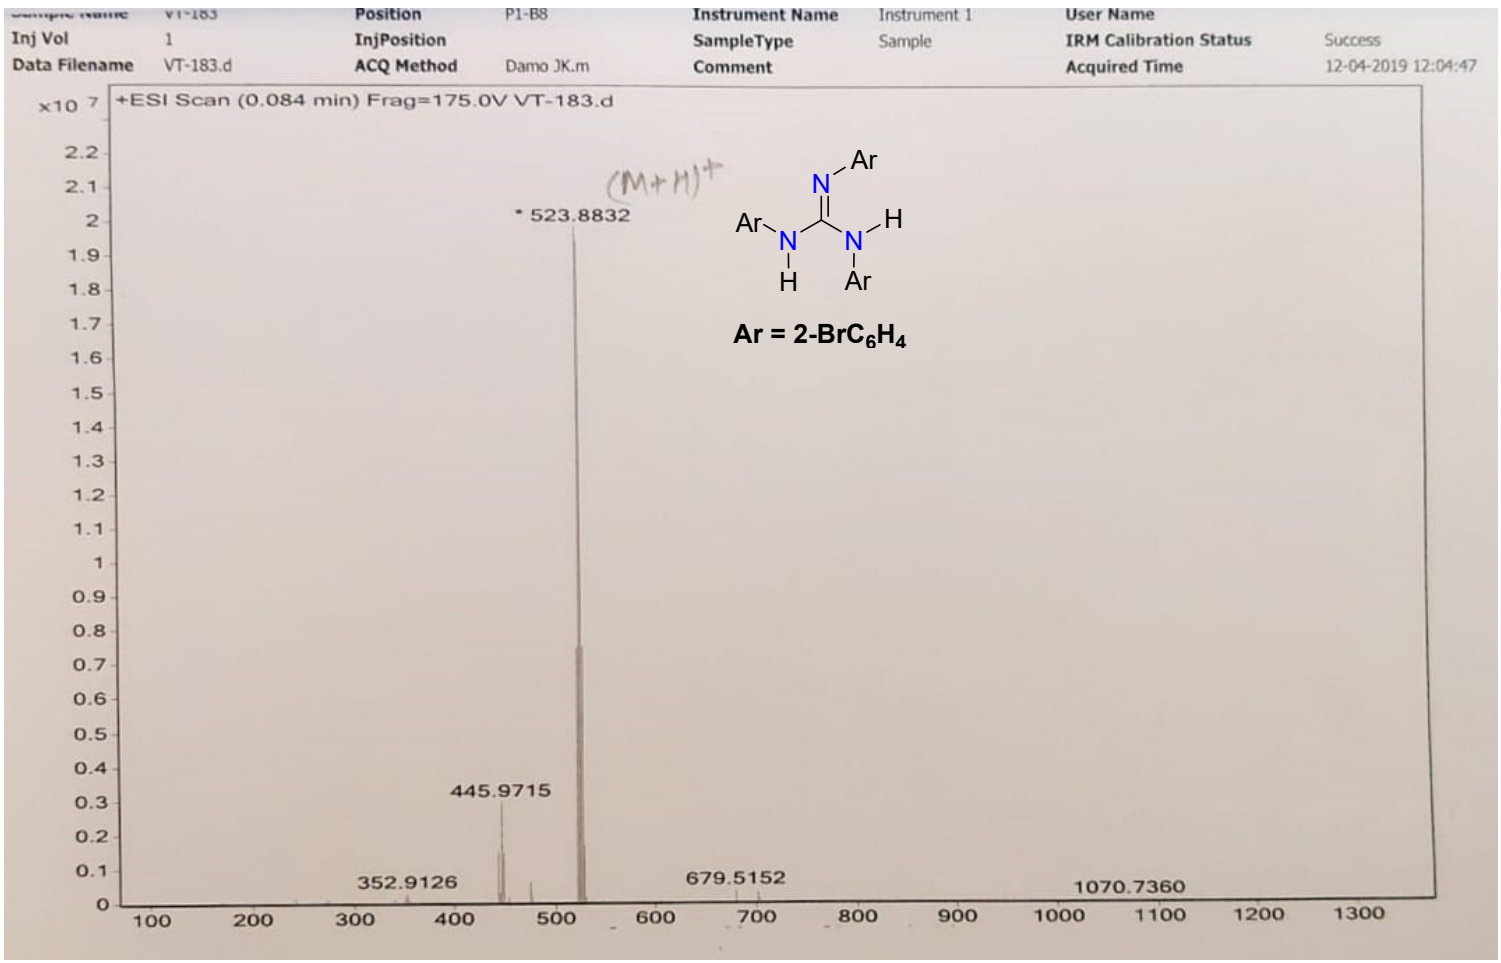

|               |          |             |           |                 |              |                        |                     |
|---------------|----------|-------------|-----------|-----------------|--------------|------------------------|---------------------|
| Inj Vol       | 1        | InjPosition | F1.D0     | Instrument Name | Instrument 1 | User Name              |                     |
| Data Filename | VT-183.d | ACQ Method  | Damo JK.m | SampleType      | Sample       | IRM Calibration Status | Success             |
|               |          |             |           | Comment         |              | Acquired Time          | 12-04-2019 12:04:47 |

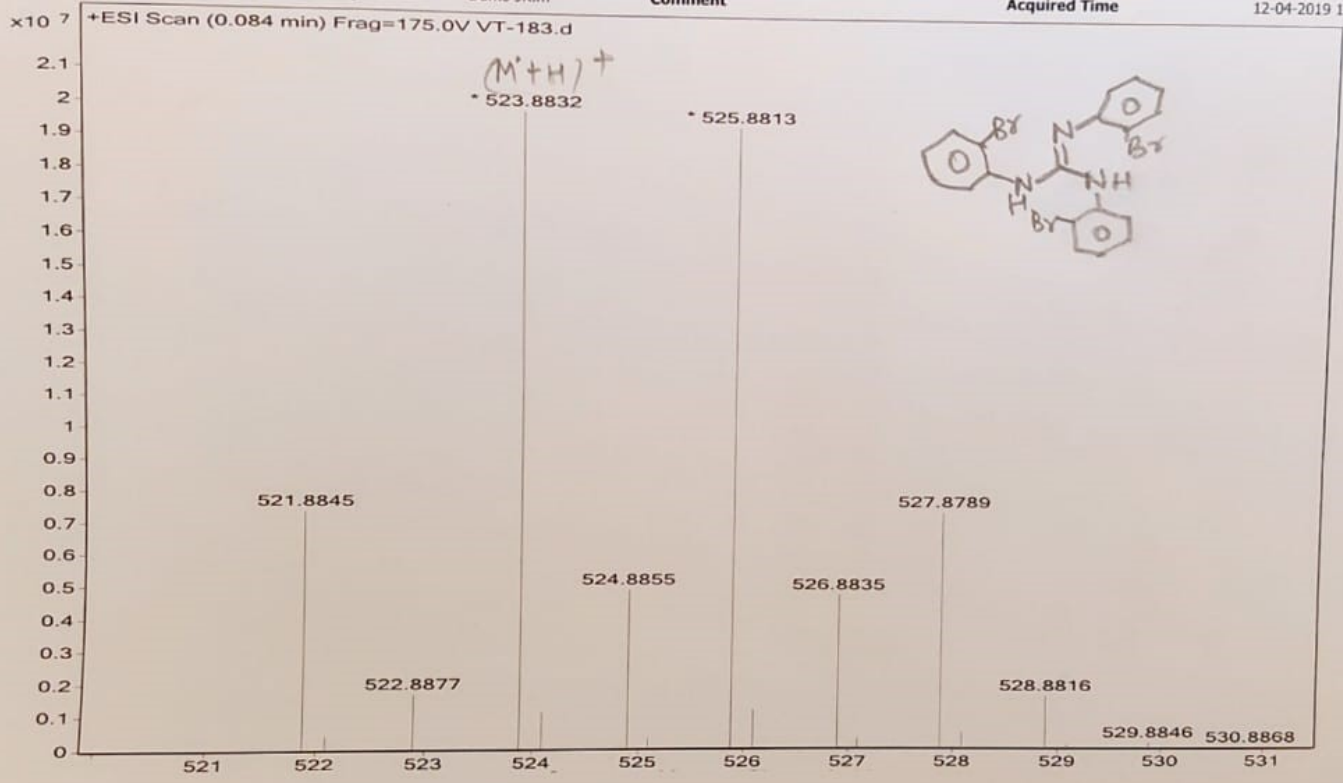

|               |          |             |              |                 |              |                        |                     |
|---------------|----------|-------------|--------------|-----------------|--------------|------------------------|---------------------|
| Sample Name   | NKS-35   | Position    | P1-C2        | Instrument Name | Instrument 1 | User Name              |                     |
| Inj Vol       | 1        | InjPosition |              | SampleType      | Sample       | IRM Calibration Status | Success             |
| Data Filename | NKS-35.d | ACQ Method  | 29.10.2014.m | Comment         |              | Acquired Time          | 30-05-2017 15:27:59 |

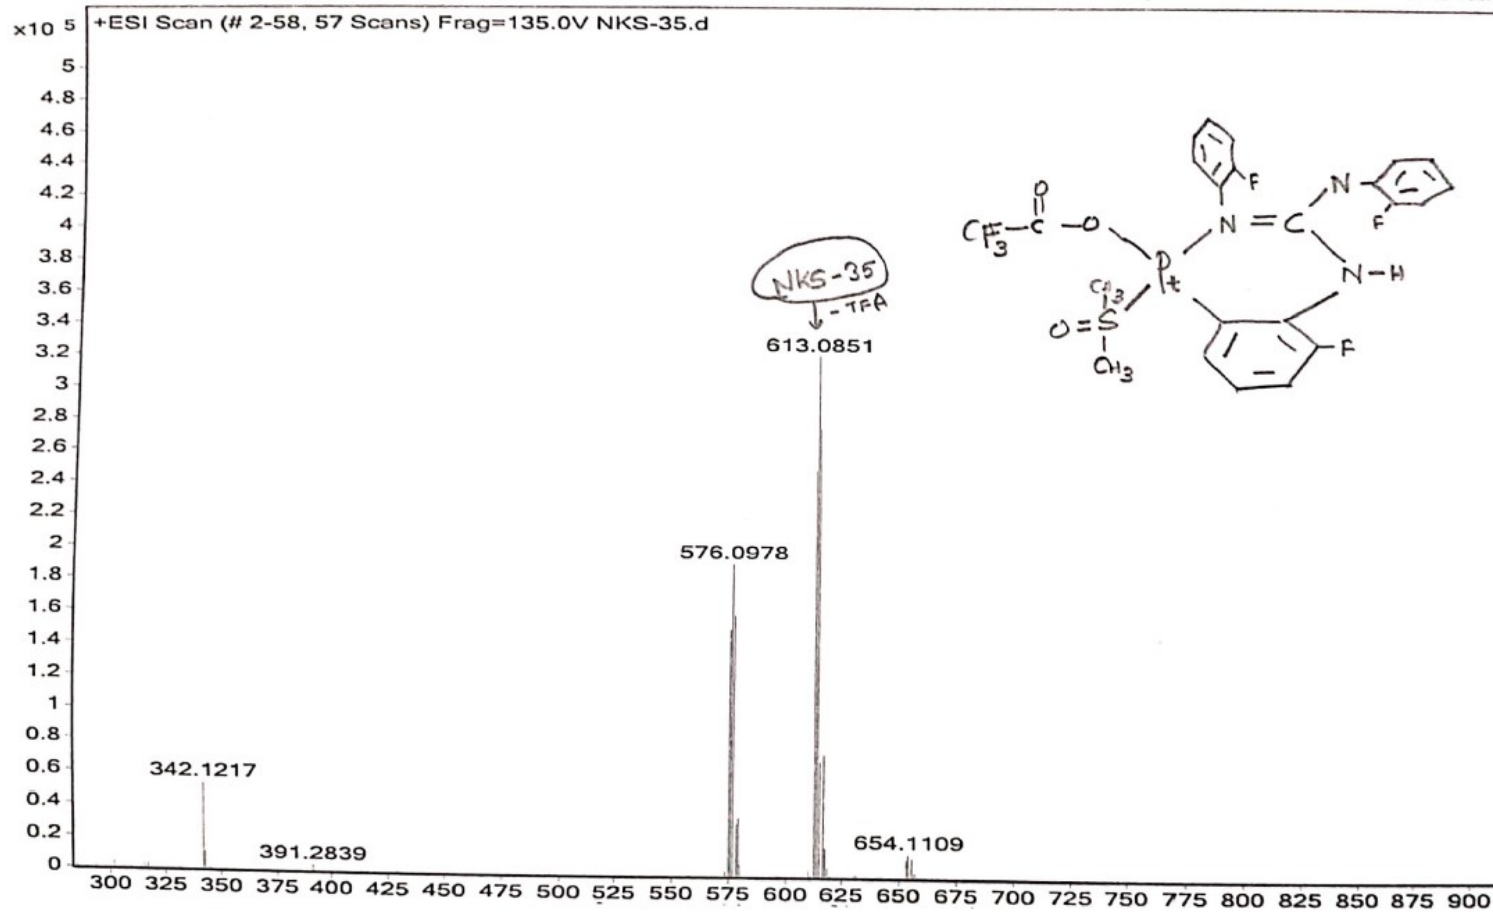

Complex 6

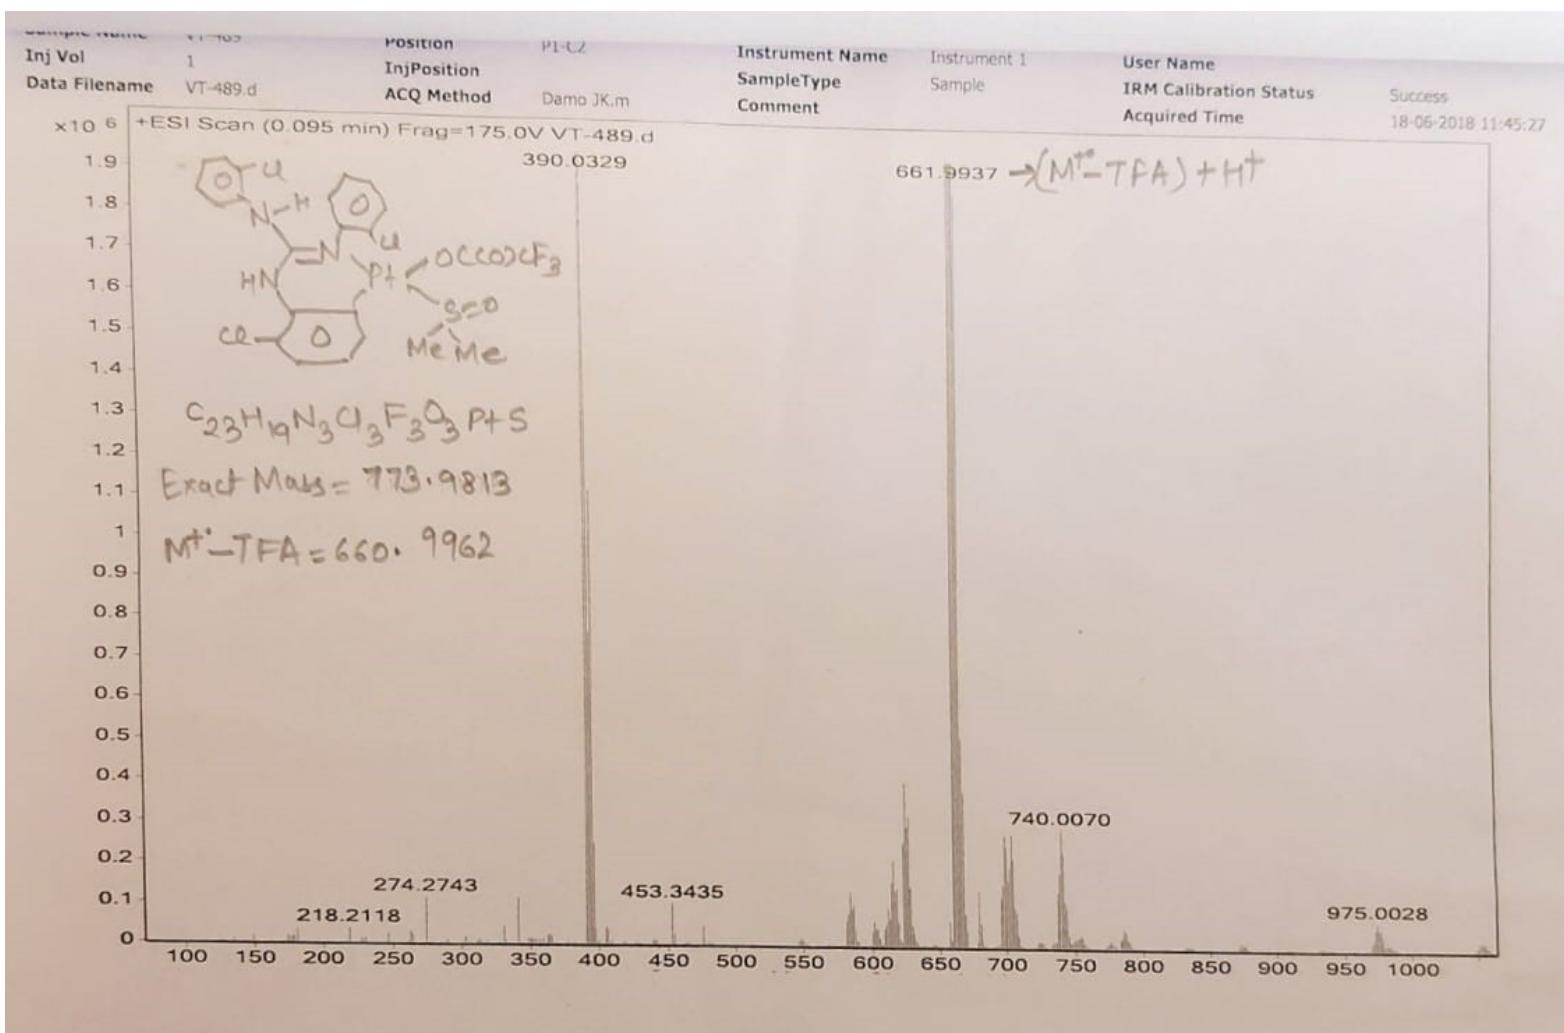

**Complex 7**



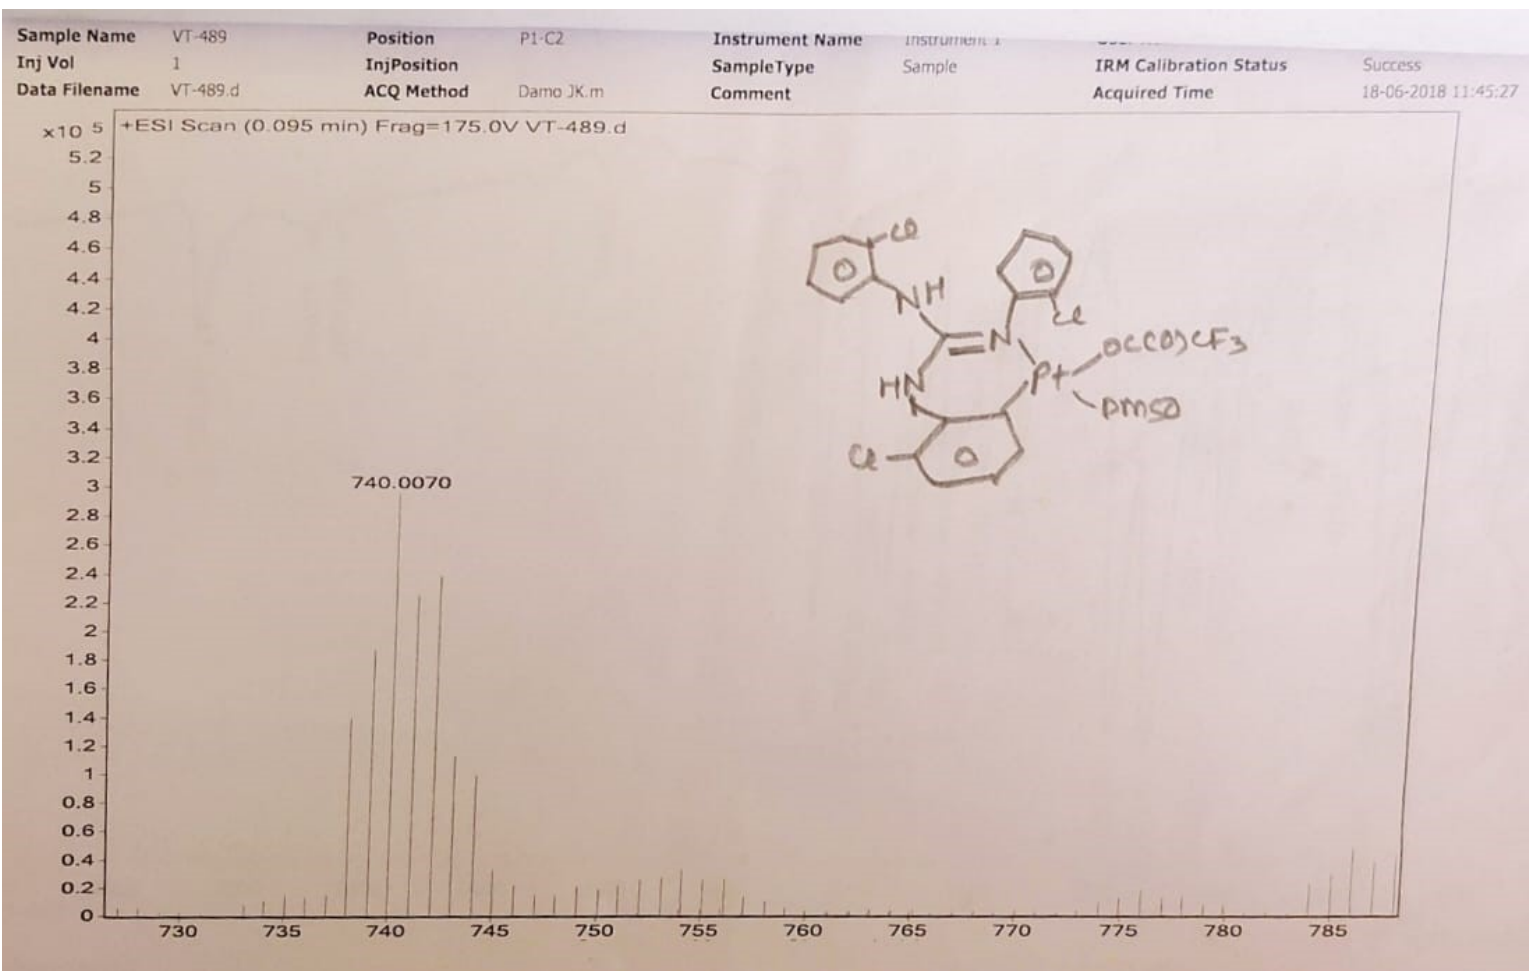

**Complex 7**

|               |          |             |           |                 |              |                        |                     |
|---------------|----------|-------------|-----------|-----------------|--------------|------------------------|---------------------|
| Sample Name   | VT-495   | Position    | P1-C3     | Instrument Name | Instrument 1 | User Name              |                     |
| Inj Vol       | 1        | InjPosition |           | SampleType      | Sample       | IRM Calibration Status | Success             |
| Data Filename | VT-495.d | ACQ Method  | Damo JK.m | Comment         |              | Acquired Time          | 18-06-2018 11:47:09 |

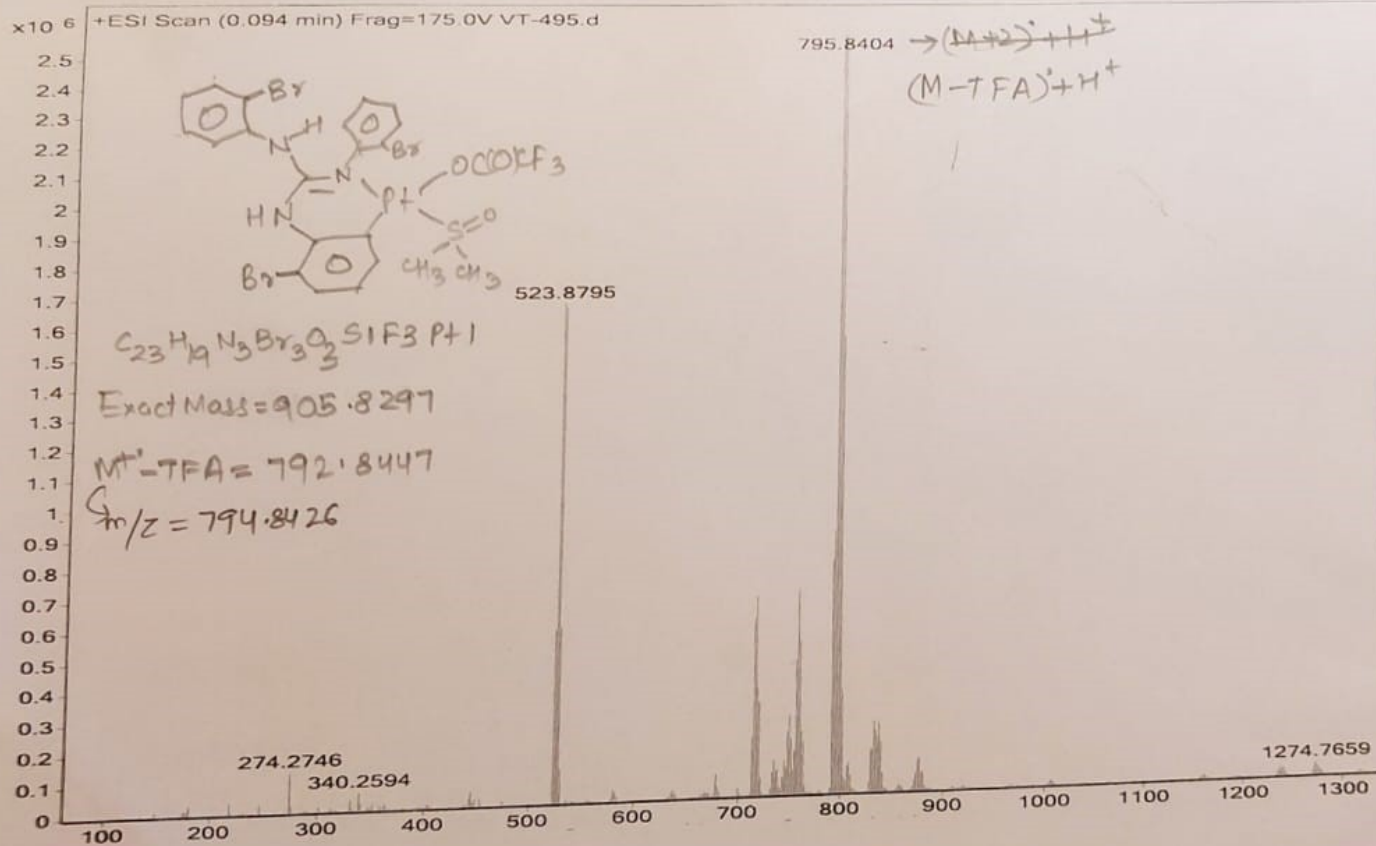

Complex 8

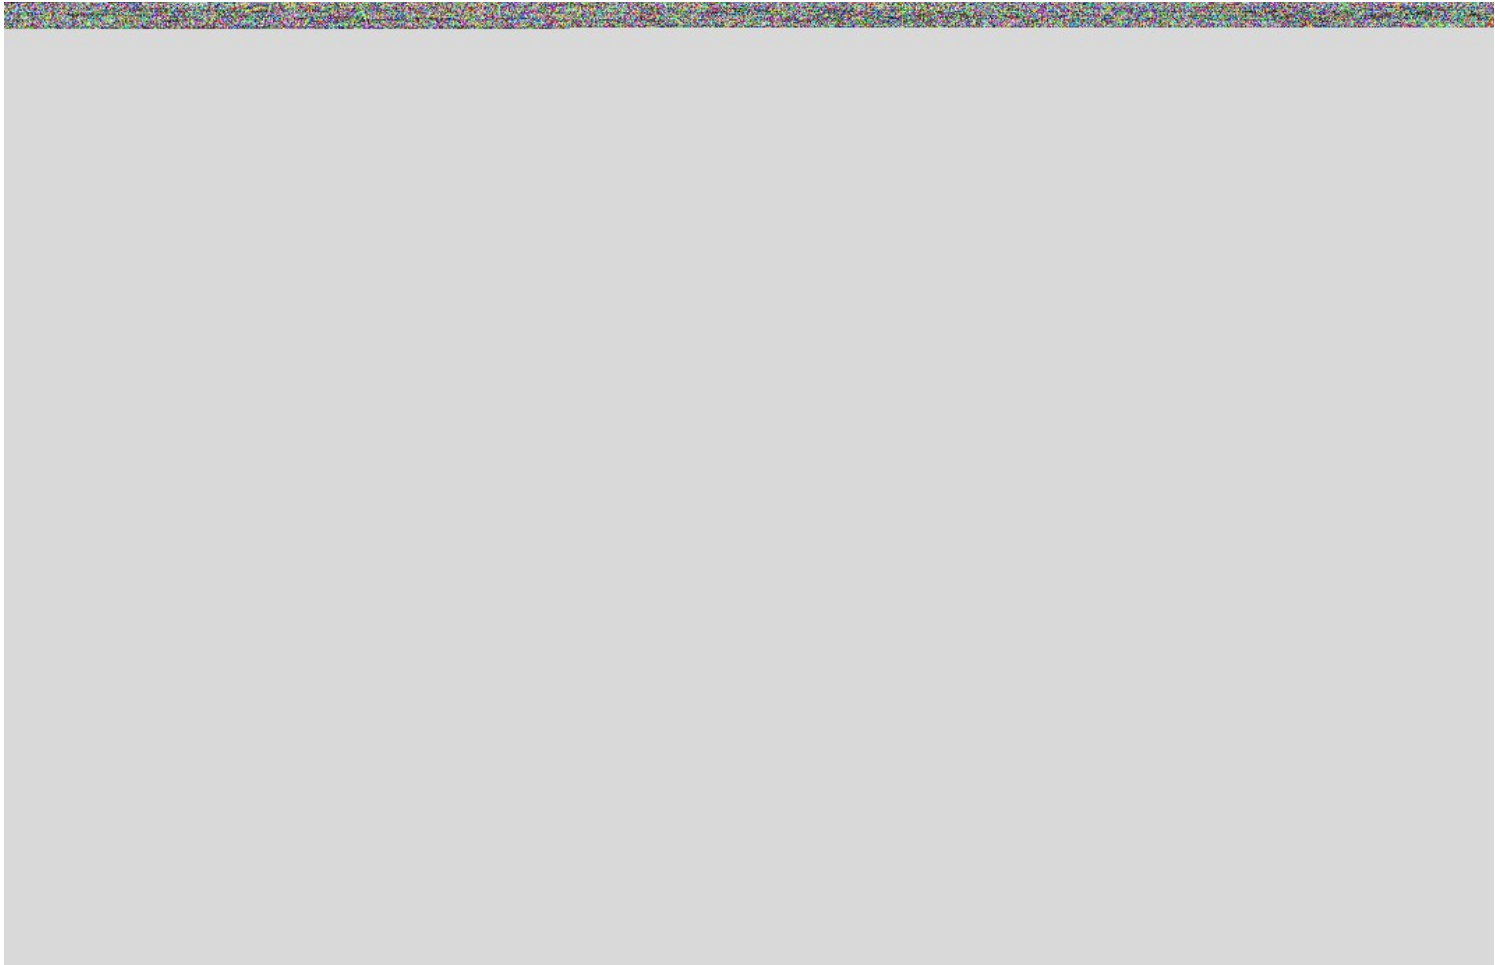

**Complex 8**

S211

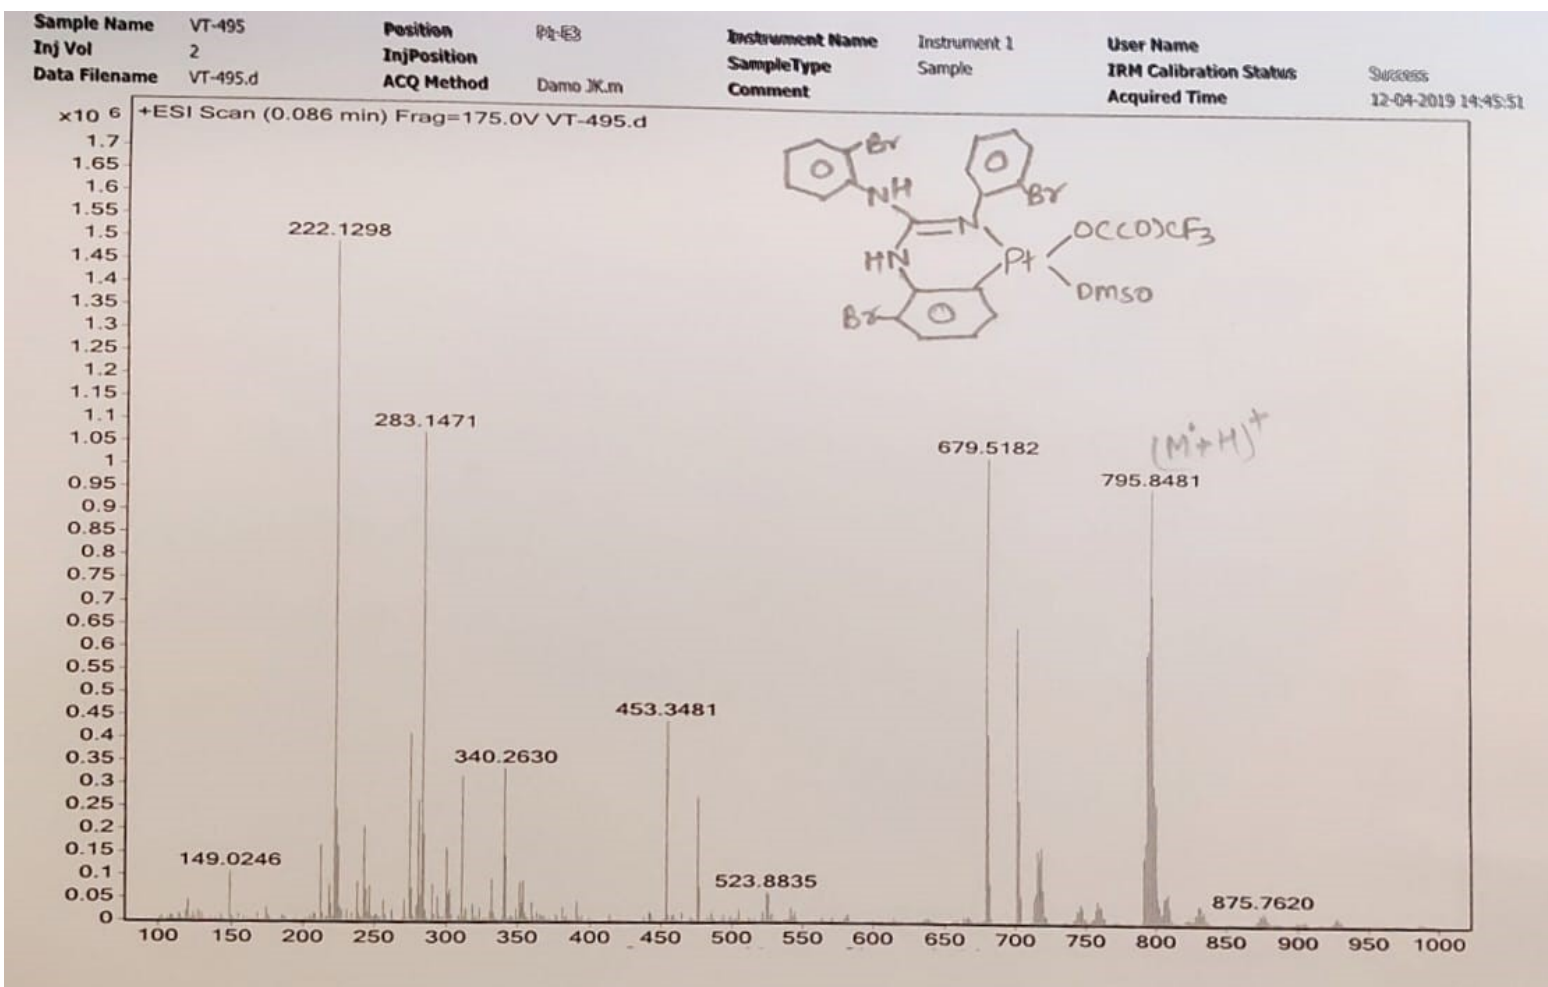

Complex 8

|               |          |             |           |                 |              |                        |                     |
|---------------|----------|-------------|-----------|-----------------|--------------|------------------------|---------------------|
| Sample Name   | VT-495   | Position    | P1-C3     | Instrument Name | Instrument 1 | User Name              |                     |
| Inj Vol       | 1        | InjPosition |           | SampleType      | Sample       | IRM Calibration Status | Success             |
| Data Filename | VT-495.d | ACQ Method  | Damo JK.m | Comment         |              | Acquired Time          | 18-06-2018 11:47:09 |

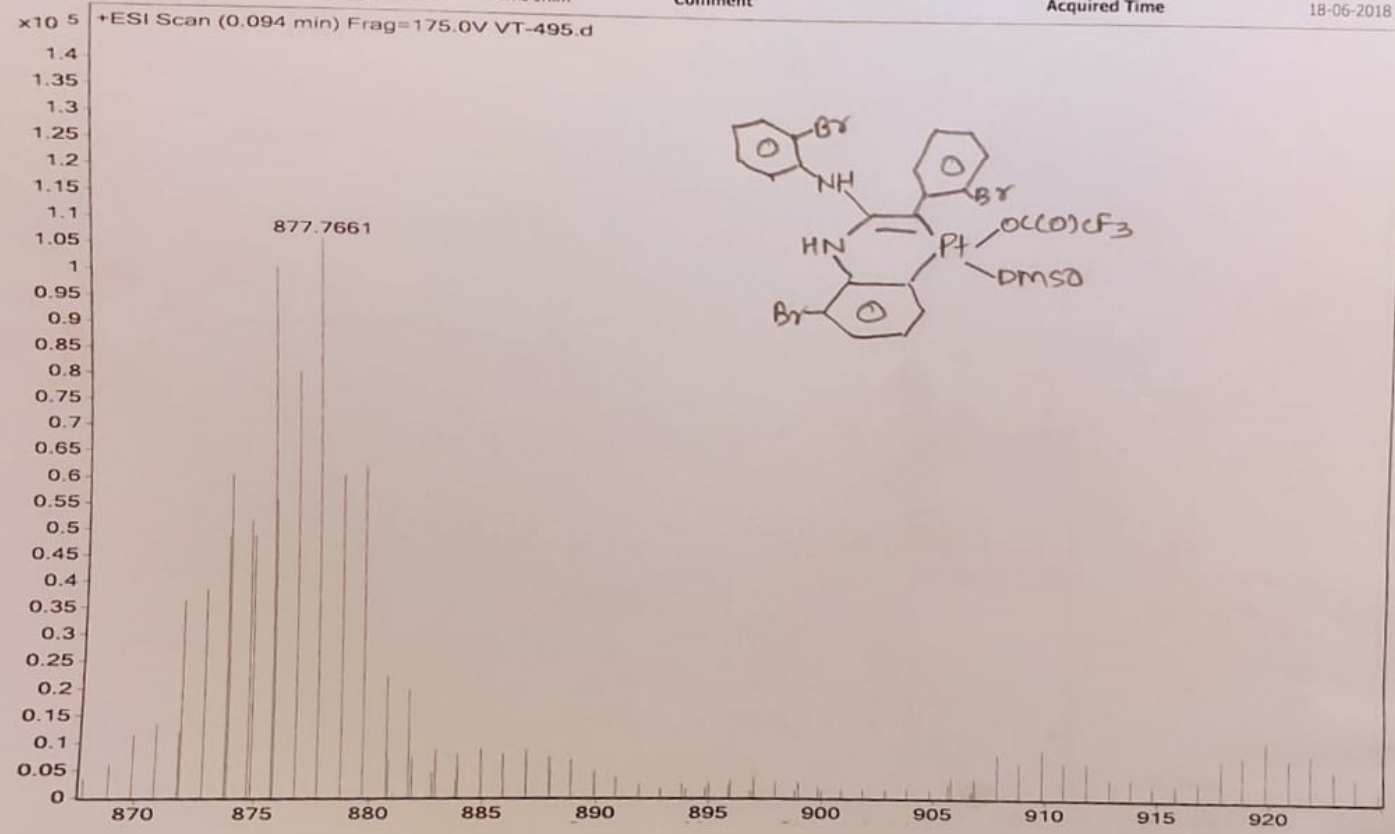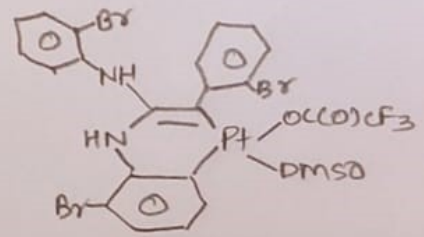

**Complex 8**

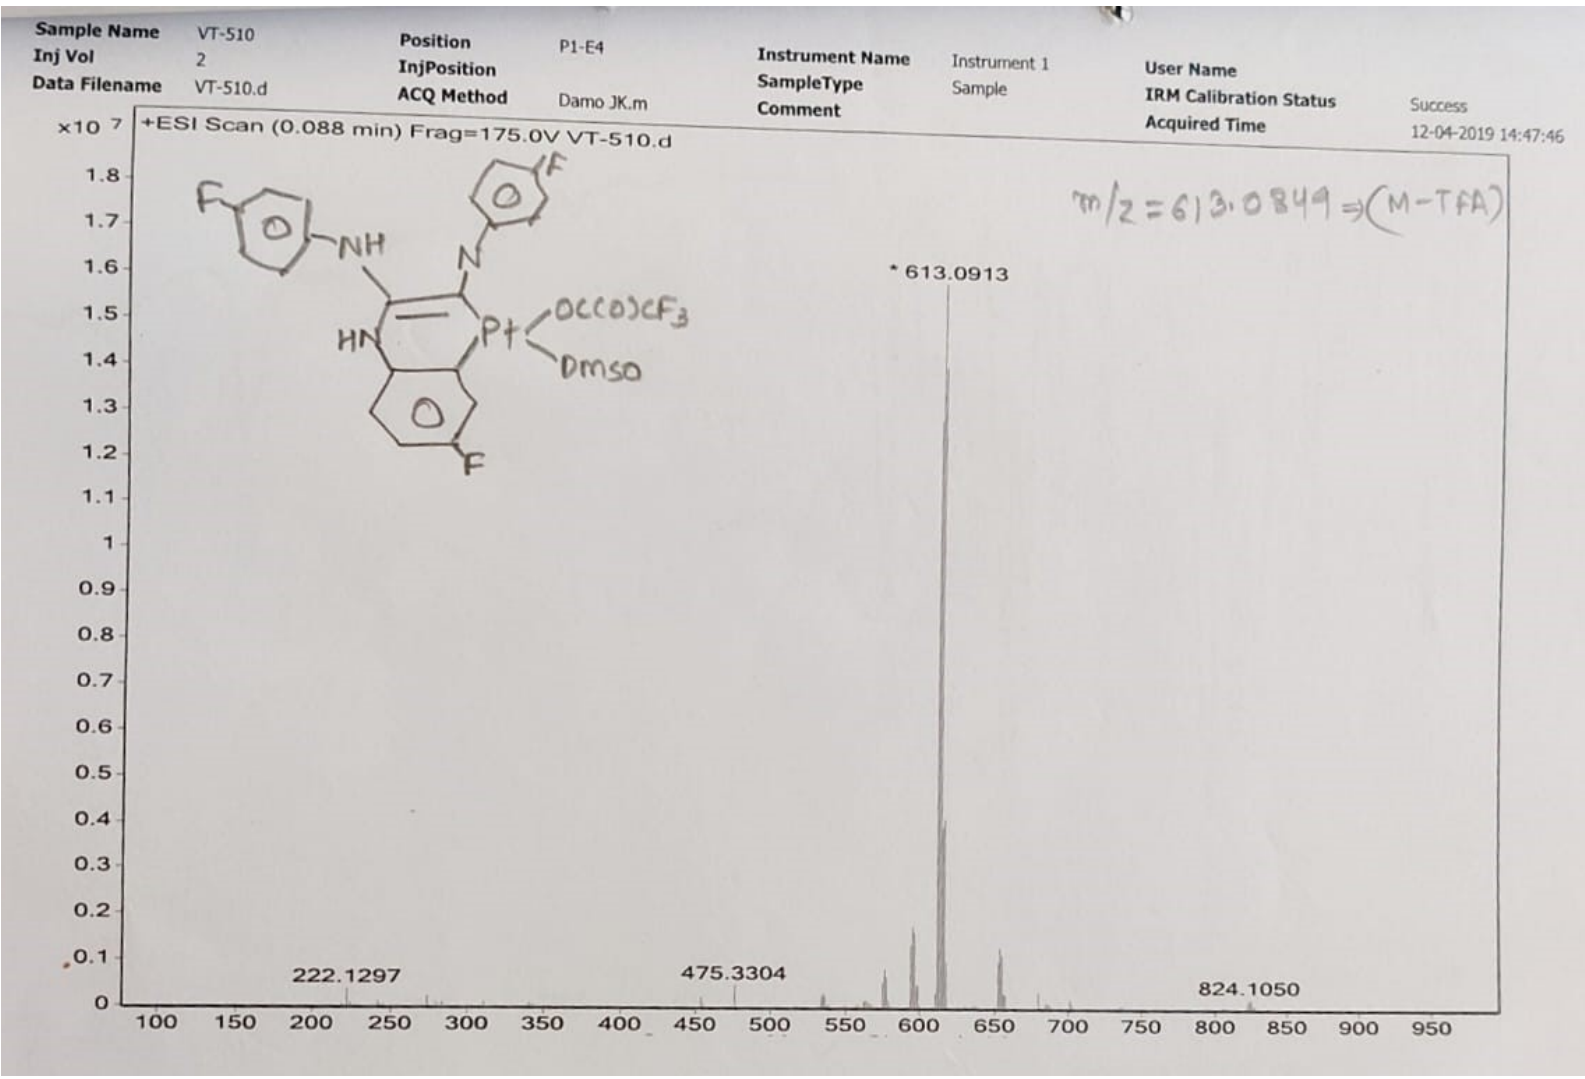

Complex 9

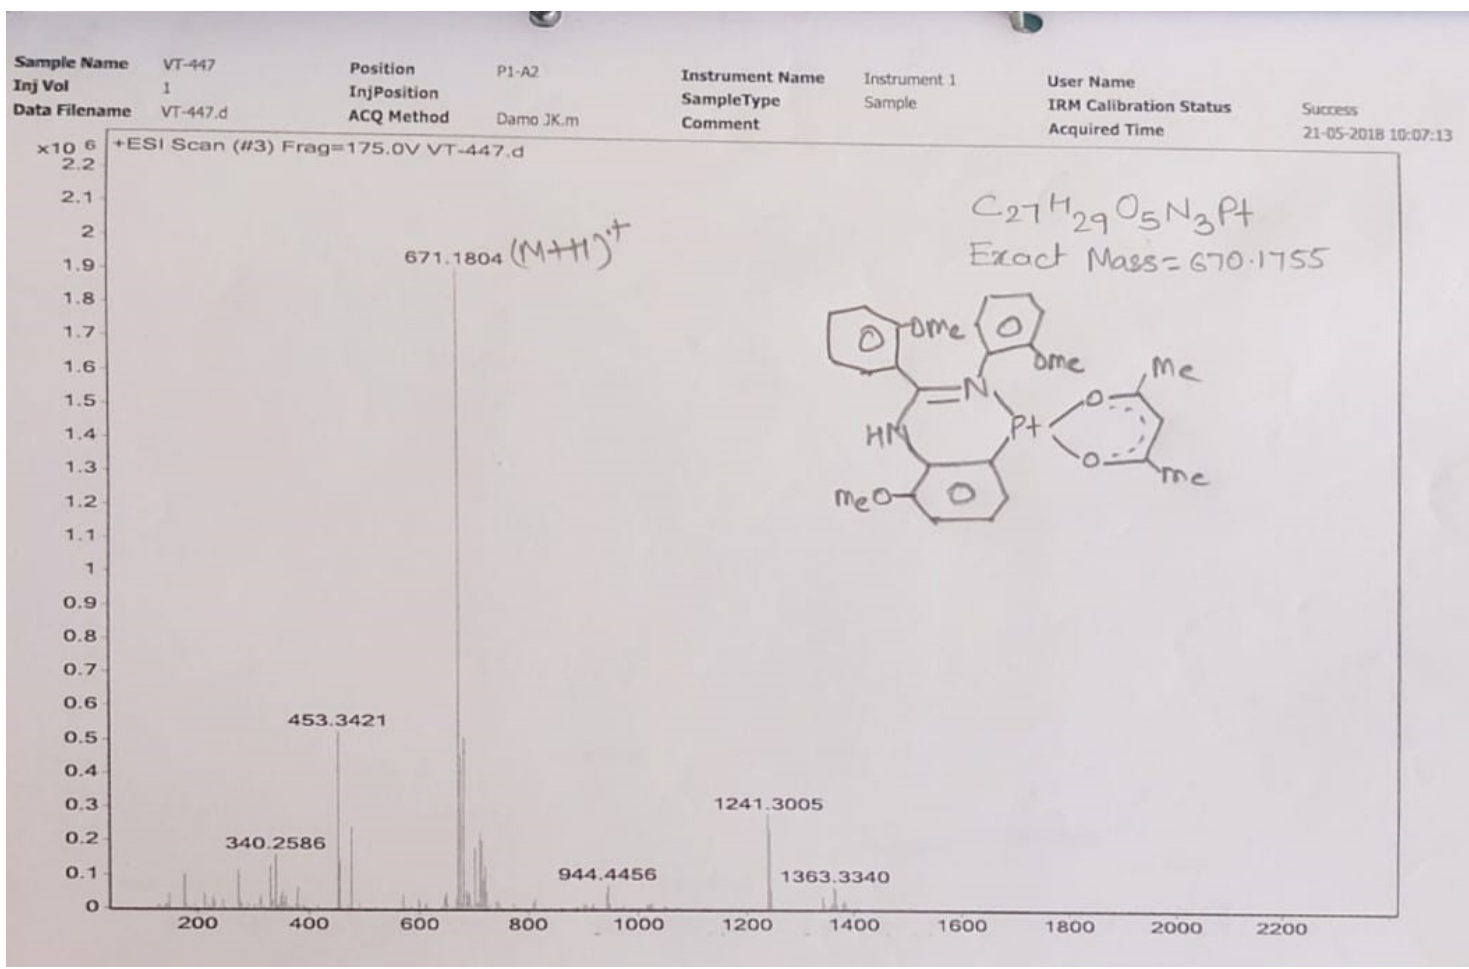

Complex 10

# Qualitative Compound Report

Data File: VT-449.d  
 Sample Type: Sample  
 Instrument Name: Instrument 1  
 Acq Method: Demo JK.m  
 IRM Calibration Status: Success  
 Comment:   
 Sample Name: VT-449  
 Position: P1-A1  
 User Name:   
 Acquired Time: 21-05-2018 10:05:27  
 DA Method: Default.m

Sample Group:   
 Acquisition SW: 6200 series TOF/6500 series  
 Version: Q-TOF B.05.01 (B5125.1)  
 Info:

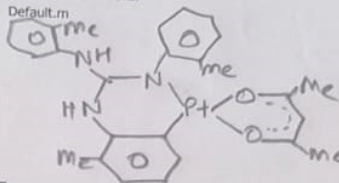

### Compound Table

| Compound Label | RT | Mass     | MFG Formula |
|----------------|----|----------|-------------|
| Cpd 2: 4       | 4  | 625.1741 | <none>      |

| Compound Label | m/z      | RT | Algorithm                 | Mass     |
|----------------|----------|----|---------------------------|----------|
| Cpd 2: 4       | 626.1814 | 4  | Find by Molecular Feature | 625.1741 |

### MFE MS Spectrum

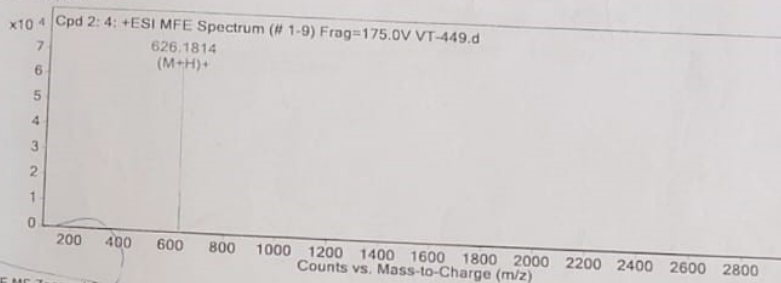

### MFE MS Zoomed Spectrum

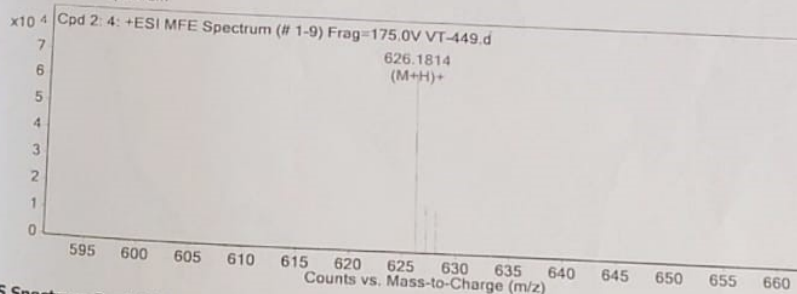

### MS Spectrum Peak List

| m/z      | z | Abund    | Ion    |
|----------|---|----------|--------|
| 626.1814 | 1 | 66196.11 | (M+H)+ |
| 627.1837 | 1 | 16867.11 | (M+H)+ |
| 628.1796 | 1 | 15321.1  | (M+H)+ |

--- End Of Report ---

Complex 11

S216



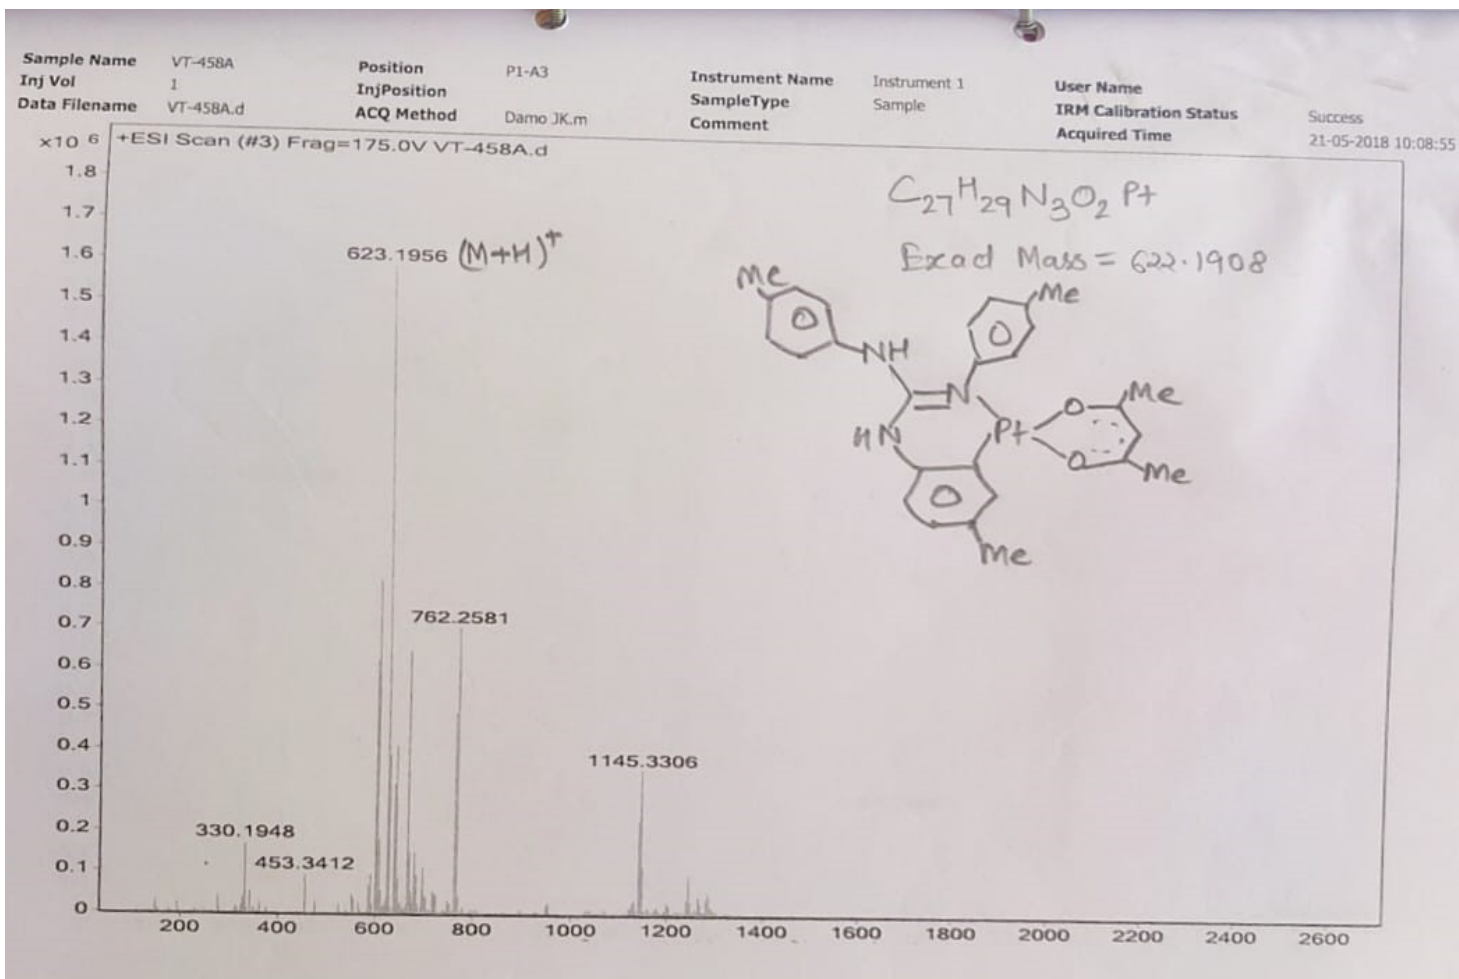

Complex 12

# Qualitative Compound Report

Data File: VT-466.d  
 Sample Type: Sample  
 Instrument Name: Instrument 1  
 Acq Method: Damo JK.m  
 IRM Calibration Status: Success  
 Comment: XXXXXXXXXX

Sample Name: VT-466  
 Position: P1-A1  
 User Name:   
 Acquired Time: 05-07-2018 11:33:55  
 DA Method: Default.m

Sample Group:   
 Acquisition SW: 6200 series TOF/6500 series  
 Version: Q-TOF B.05.01 (B5125.1)

Info.

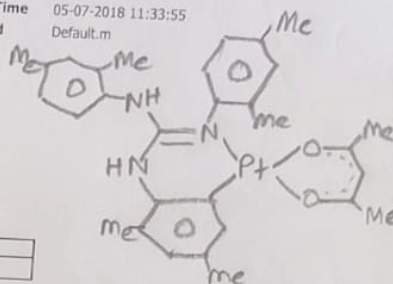

## Compound Table

| Compound Label | RT   | Mass     | MFG Formula |
|----------------|------|----------|-------------|
| Cpd 4: 0.090   | 0.09 | 664.2383 | <none>      |

| Compound Label | m/z      | RT   | Algorithm                 | Mass     |
|----------------|----------|------|---------------------------|----------|
| Cpd 4: 0.090   | 665.2456 | 0.09 | Find by Molecular Feature | 664.2383 |

## MFE MS Spectrum

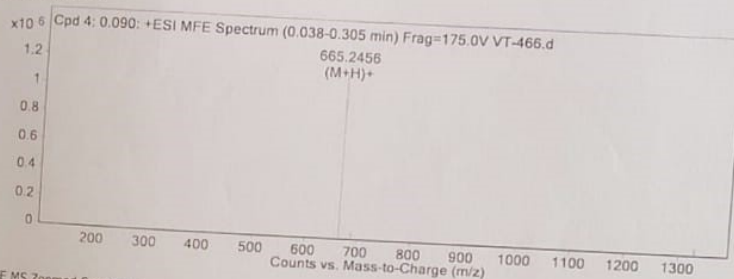

## MFE MS Zoomed Spectrum

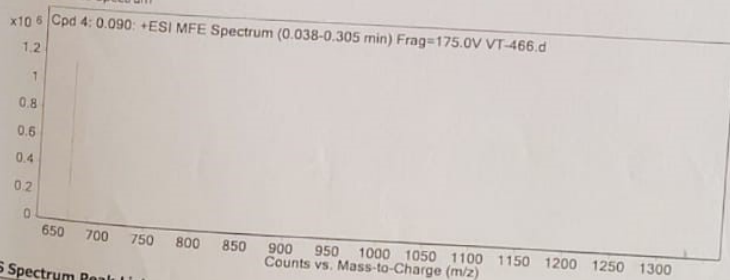

## MS Spectrum Peak List

| m/z       | z | Abund      | Ion     |
|-----------|---|------------|---------|
| 665.2456  | 1 | 1139623.38 | (M+H)+  |
| 687.2261  | 1 | 43533.89   | (M+Na)+ |
| 1329.4813 | 1 | 55080.16   | (2M+H)+ |
| 1330.4829 | 1 | 50781.88   | (2M+H)+ |
| 1331.4847 | 1 | 35908.16   | (2M+H)+ |

Complex 13

S218

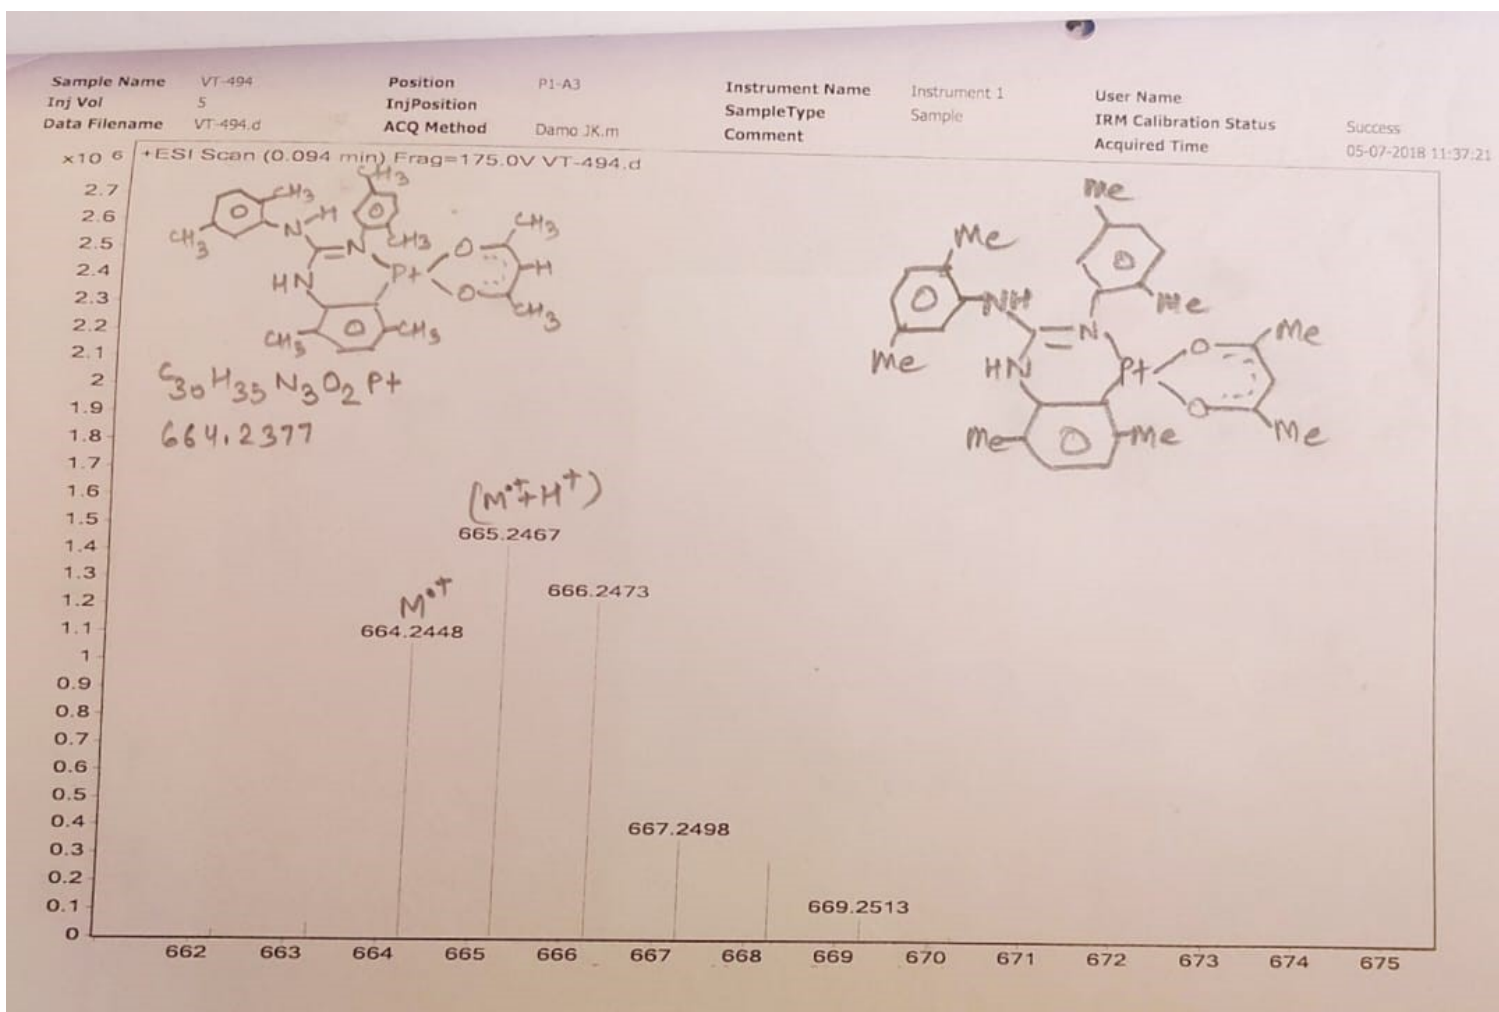

Complex 14

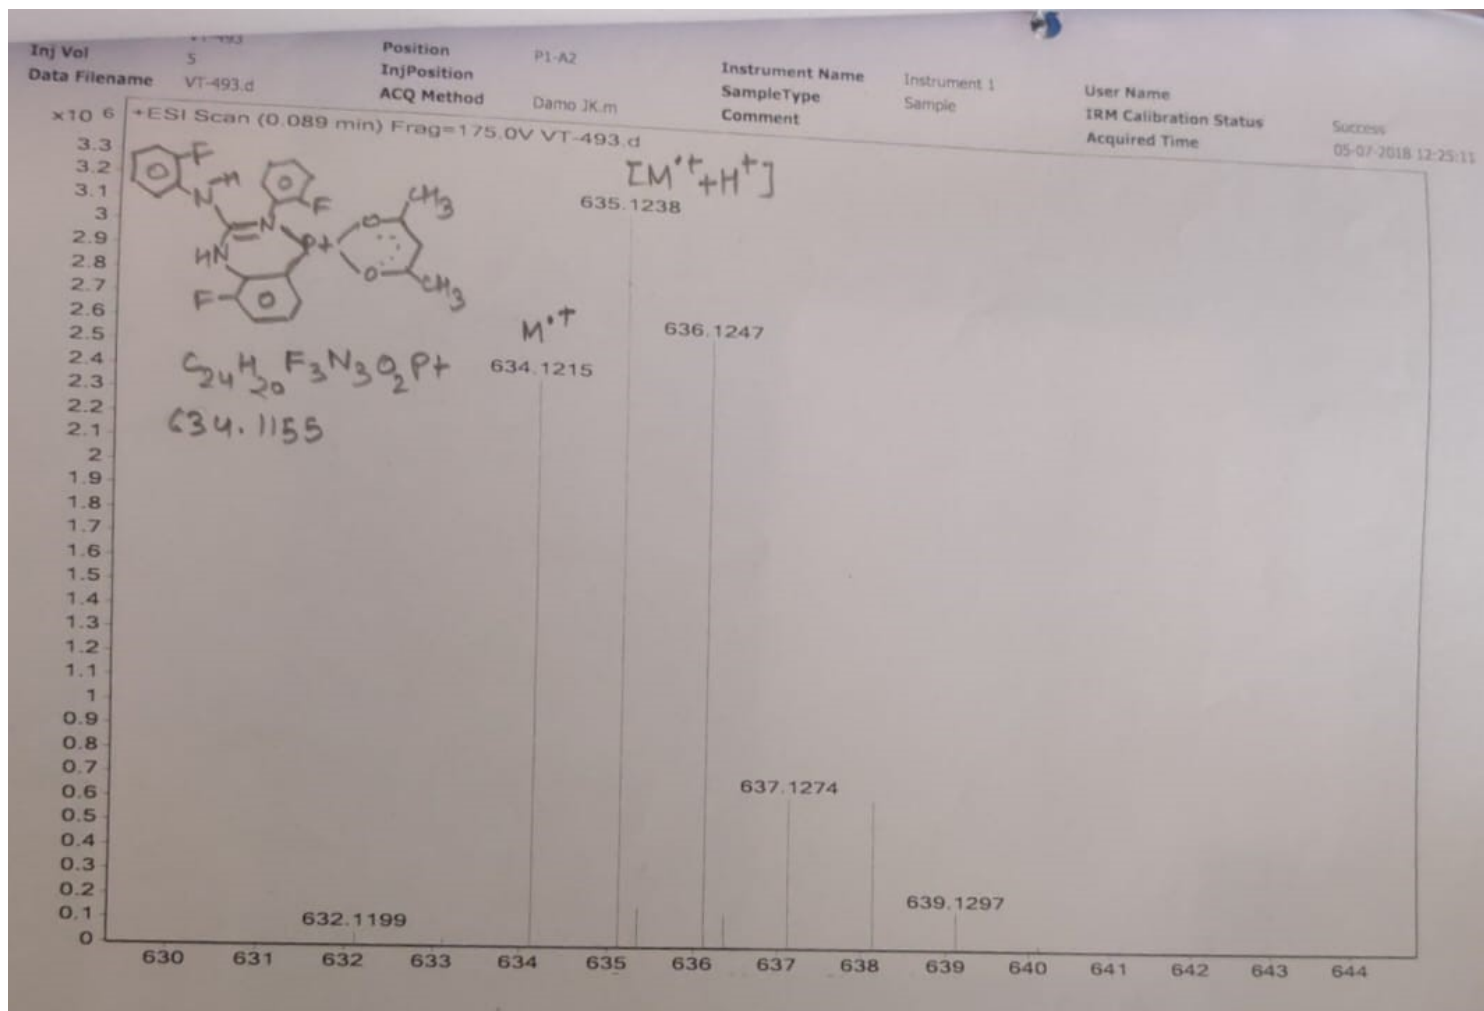

Complex 15

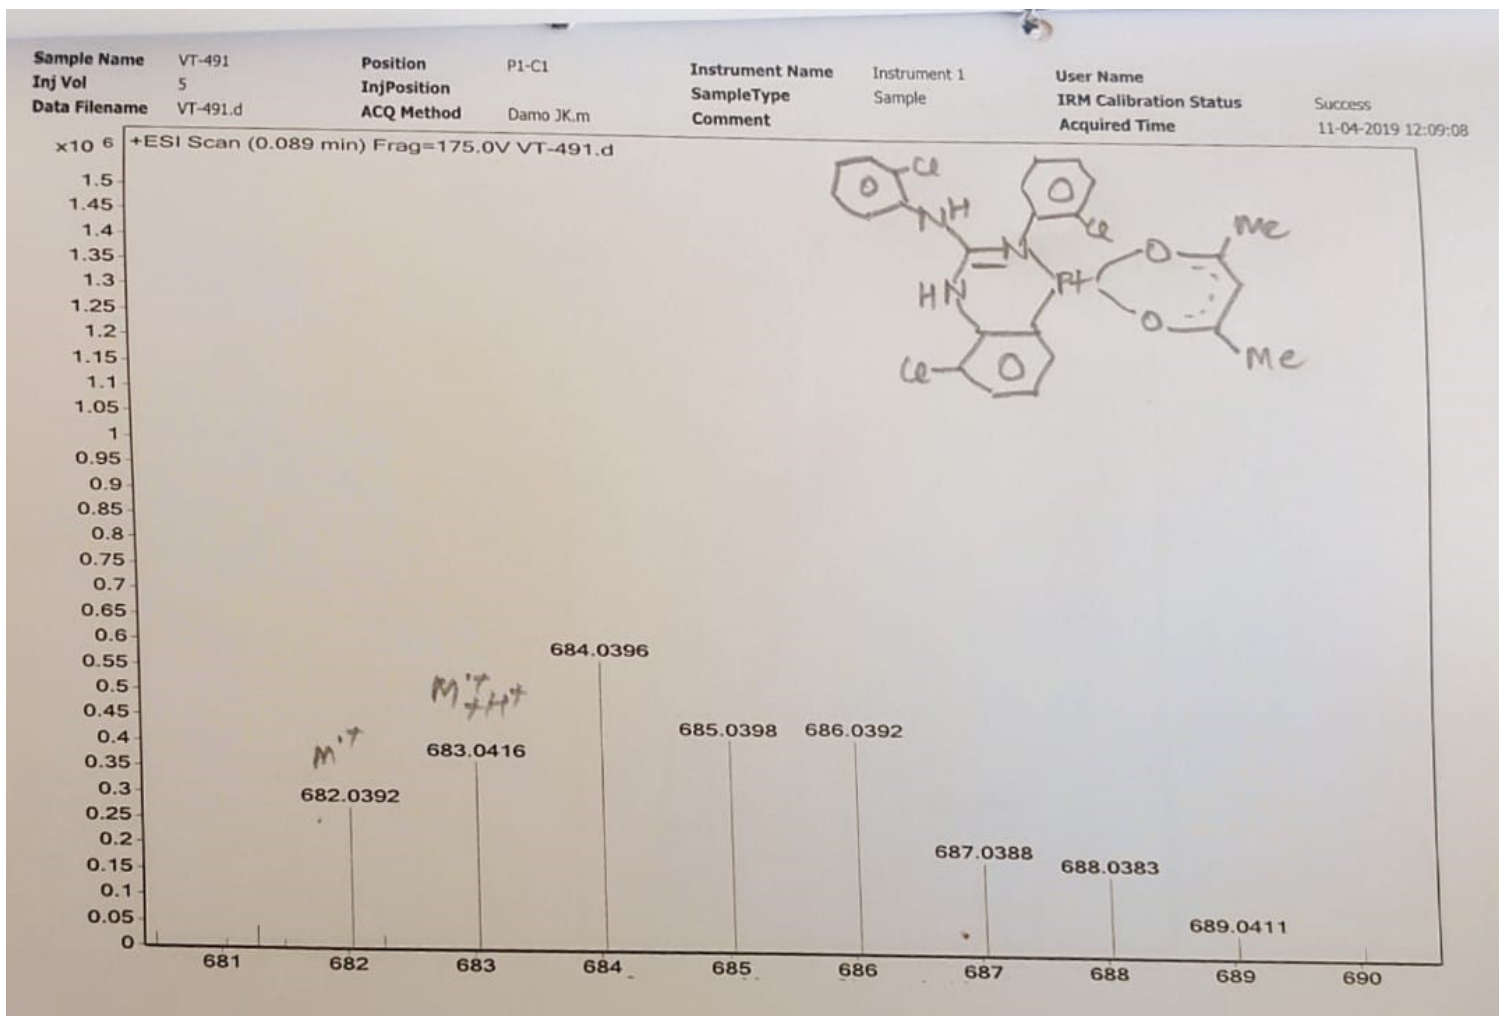

Complex 16

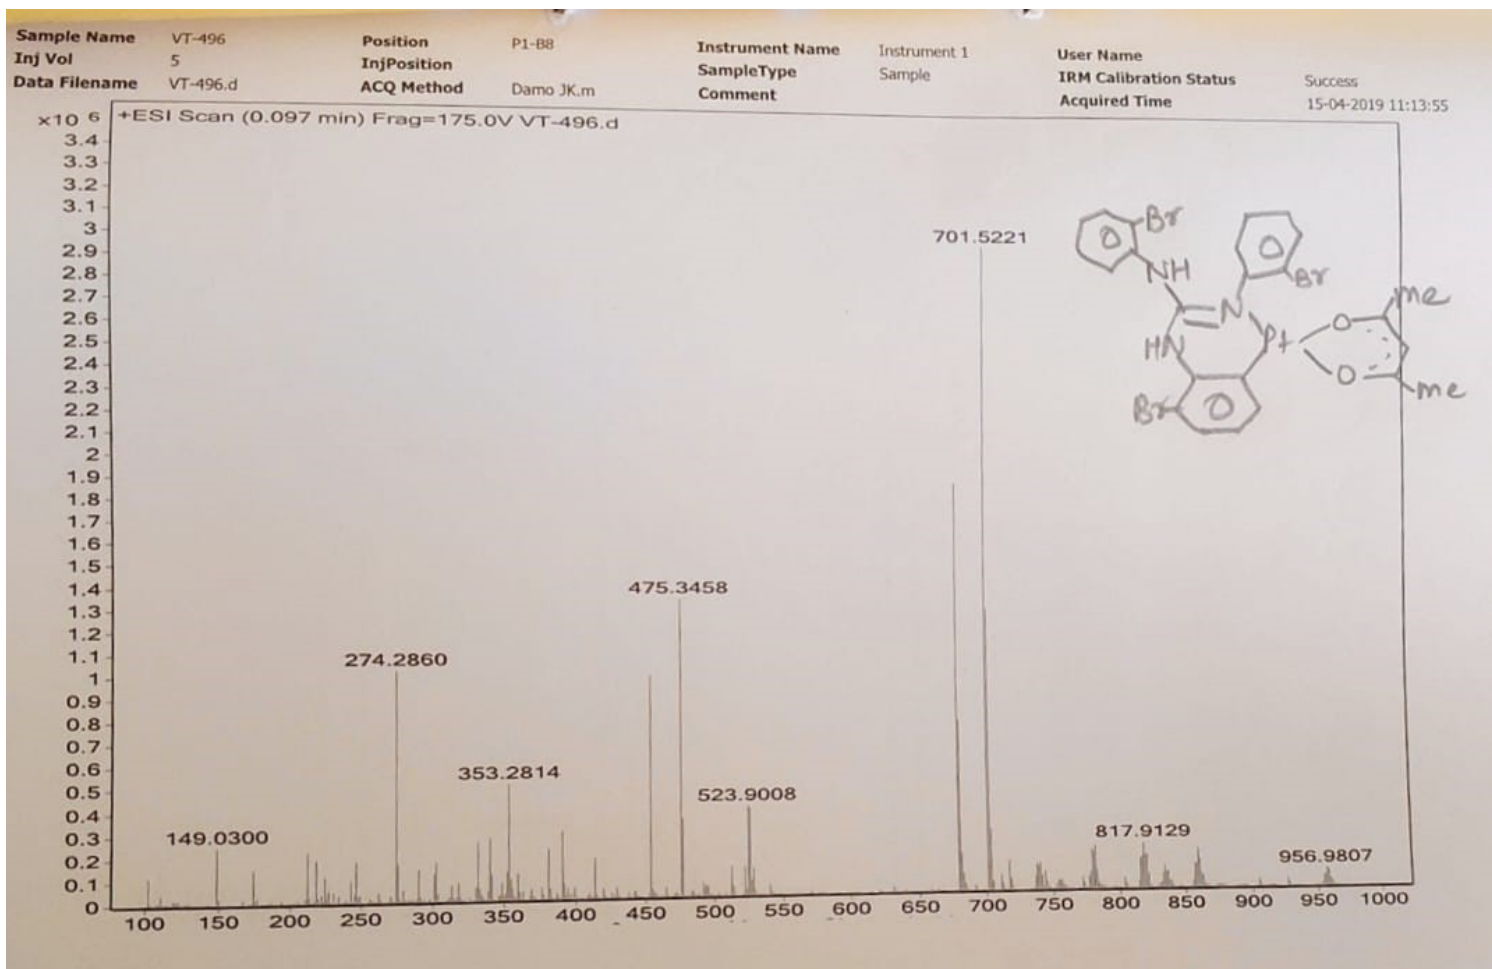

Complex 17

| Sample Name   | Position    | Instrument Name | User Name              |
|---------------|-------------|-----------------|------------------------|
| VT-511        | P1-C3       | Instrument 1    |                        |
| Inj Vol       | InjPosition | SampleType      | IRM Calibration Status |
| 5             |             | Sample          | Success                |
| Data Filename | ACQ Method  | Comment         | Acquired Time          |
| VT-511.d      | Damo JK.m   |                 | 11-04-2019 12:13:03    |

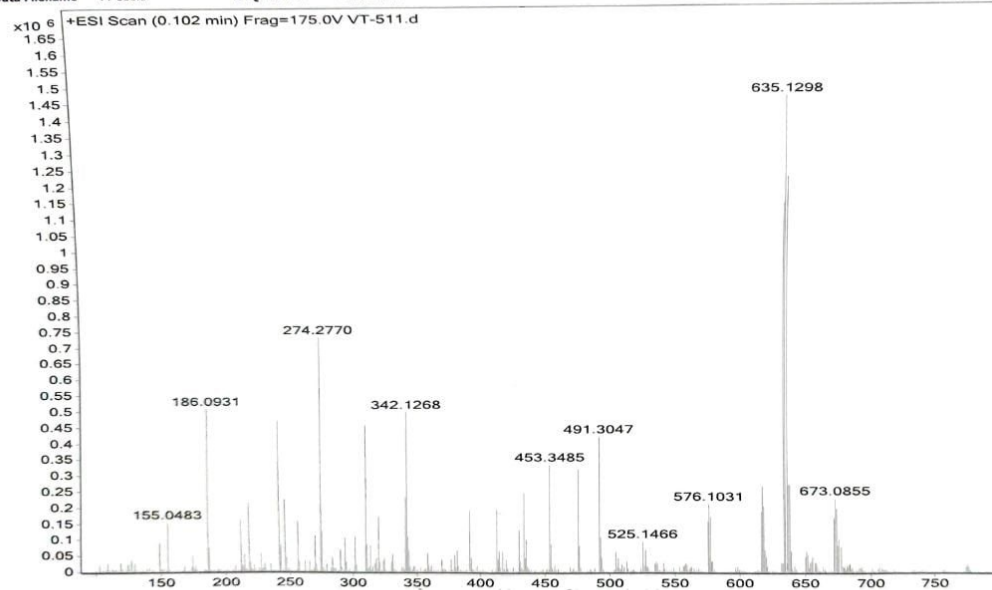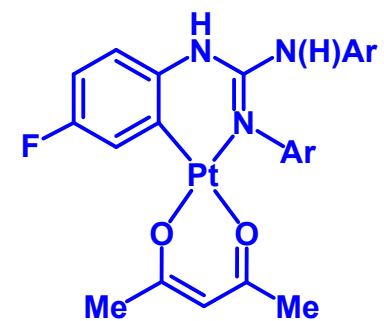

Ar = 4-FC<sub>6</sub>H<sub>4</sub> (**18**)

|               |          |             |           |                 |              |                        |                     |
|---------------|----------|-------------|-----------|-----------------|--------------|------------------------|---------------------|
| Sample Name   | VT-480   | Position    | P1-B7     | Instrument Name | Instrument 1 | User Name              |                     |
| Inj Vol       | 1        | InjPosition |           | SampleType      | Sample       | IRM Calibration Status | Success             |
| Data Filename | VT-480.d | ACQ Method  | Damo JK.m | Comment         |              | Acquired Time          | 12-04-2019 12:02:49 |

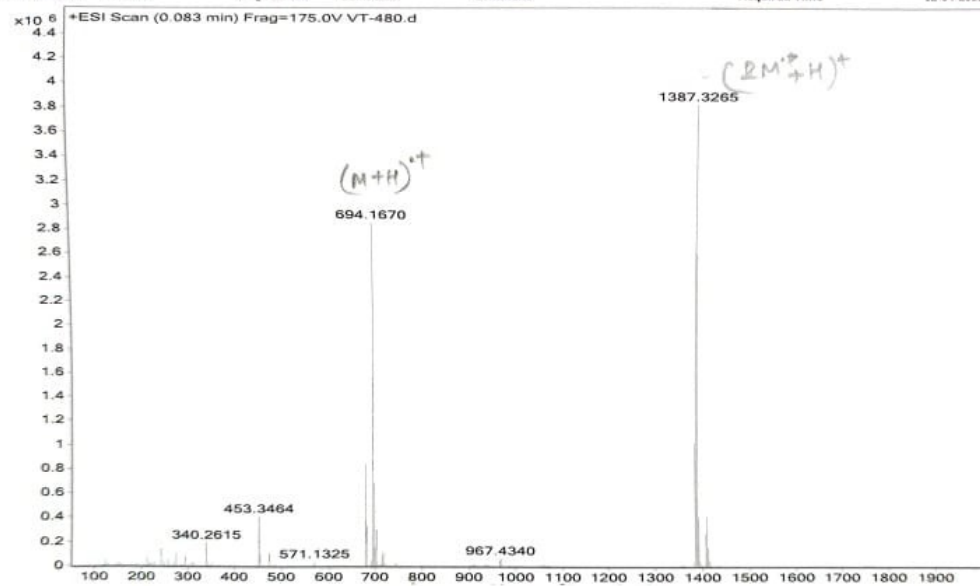

### Complex 19

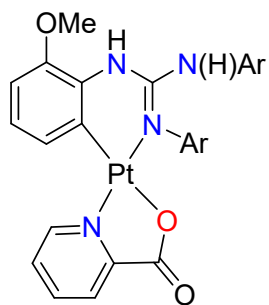



## References

1. K. Pradeesh, J. J. Baumberg, and G. V. Prakash, *Optic Express*, 2009, **17**, 22171–22178.
2. K. Gopi, B. Rathi and N. Thirupathi, *J. Chem. Sci.* 2010, **122**, 157–167.
3. P. Elumalai, N. Thirupathi and M. Nethaji, *Inorg. Chem.* 2013, **52**, 1883–1894.
4. R. Kumar and N. Thirupathi, *RSC Adv.* 2017, **7**, 33890–33904.
5. N. K. Sinha, V. Mishra and N. Thirupathi, *Inorg. Chem.* 2023, **62**, 7644–7661.
6. V. Mishra and N. Thirupathi, *ACS Omega* 2018, **3**, 6075–6090.
7. Bruker (2004). *APEX2*. Bruker AXS Inc., Madison, Wisconsin, USA.
8. Bruker (2004). *SAINT/XPREP*. Bruker AXS Inc., Madison, Wisconsin, USA.
9. Bruker (1999). *SADABS*. Bruker AXS Inc., Madison, Wisconsin, USA.
10. Rigaku Oxford Diffraction (2015). *CrysAlis PRO and CrysAlis RED*. Oxford Diffraction Ltd, Abingdon, England.
11. *CrysAlisPro*, version 1.171.34.49; Oxford Diffraction Ltd: Oxford, U.K., 2011.
12. (a) G. M. Sheldrick, University of Gottingen, Gottingen, Germany, 2017. (b) L. J. Farrugia, WinGX Suite for Small Molecule Single-Crystal Crystallography. *J. Appl. Crystallogr.* 1999, **32**, 837–838.
13. O. V. Dolomanov, L. J. Bourhis, R. J. Gildea and J. A. K. Howard, H. Puschmann, OLEX2: A complete structure solution, refinement and analysis program. *J. Appl. Crystallogr.* 2009, **42**, 339–341.
14. G. Cavallo, P. Metrangolo, R. Milani, T. Pilati, A. Priimagi, G. Resnati and G. Terraneo, *Chem. Rev.*, 2016, **116**, 2478–2601.

15. V. V. Sivchik, A. I. Solomatina, Y. Chen, A. J. Karttunen, S. P. Tunik, P. Chou and I. O. Koshevoy, *Angew. Chem.*, 2015, **127**, 14263–14266.
